# Supplementary material for: Differential long non-coding RNA expression profiles in human oocytes and cumulus cells
Source: PubMed Central journal article supplement (PMC5797088; doi:10.1038/s41598-018-20727-0), 2018-02-02
Supplement: 41598_2018_20727_MOESM1_ESM.pdf [file 41598_2018_20727_MOESM1_ESM.pdf]

# **Differential long non-coding RNA expression profiles in human oocytes and cumulus cells**

Julien Bouckenheimer, Patricia Fauque, Charles-Henri Lecellier, Céline Bruno, Thérèse

Commes, Jean-Marc Lemaître, John De Vos, Said Assou

**Supplementary Figure S1: Expression of known markers of MII oocytes and cumulus granulosa cells.**

Box-and-whisker plots showing the expression level of MII oocyte markers (*NLRP4*, *WEE2*, *AURKC*, *OOEP*, *DPPA5*, *DNMT1*, *ZP4* and *SOX30*) and cumulus cell markers (*SCD*, *StAR*, *HSPG2*, *GJA1*, *LHCGR*, *INHBA*, *ADAMTS1* and *IL1R1*) in MII oocyte (n=10) and cumulus granulosa samples (n=10), based on the SAM analysis of RNA-seq expression data. The resulting data demonstrated the high and specific expression pattern of these markers. O: Oocytes, C: Cumulus granulosa cells.

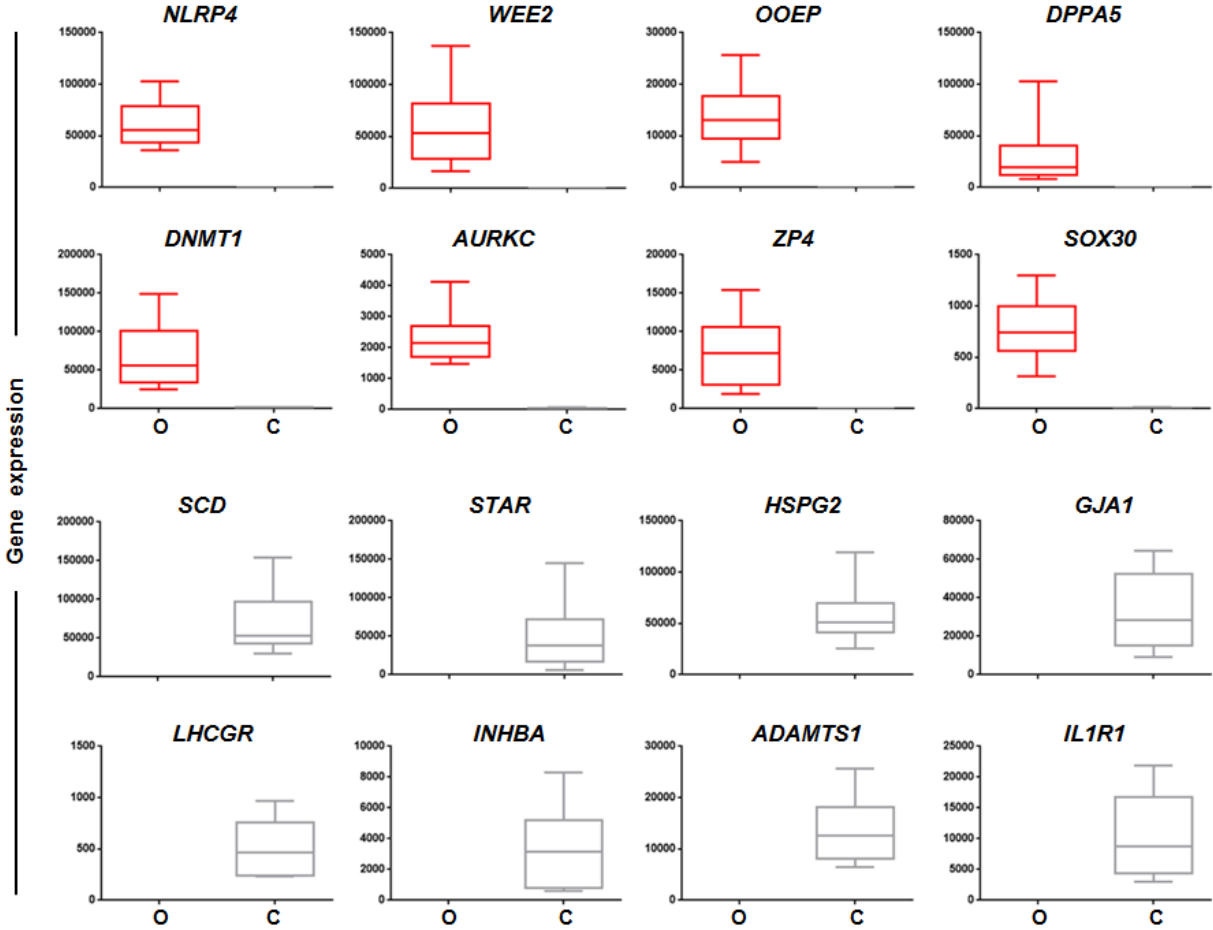

**Supplementary Figure S2:** Ingenuity Pathway Analysis (IPA) showing the molecular and cellular functions of age-related lncRNAs.

**Molecular and cellular functions**

| Name                        |                                                                                     | p-value range       |
|-----------------------------|-------------------------------------------------------------------------------------|---------------------|
| Lipid Metabolism            |  | 2,42E-02 - 5,62E-04 |
| Small Molecule Biochemistry |  | 2,42E-02 - 5,62E-04 |
| Molecular Transport         |  | 1,26E-02 - 8,42E-04 |
| Carbohydrate Metabolism     |  | 2,42E-02 - 1,12E-03 |
| Cell Cycle                  |  | 1,17E-02 - 1,40E-03 |

1 1 1 1 1 1 1 1 1 1  
1 2 3 4 5 6 7 8 9 >
