# Supplementary material for: Differential long non-coding RNA expression profiles in human oocytes and cumulus cells
Source: PubMed Central journal article supplement (PMC5797088; doi:10.1038/s41598-018-20727-0), 2018-02-02
Supplement: 41598_2018_20727_MOESM2_ESM.pdf [file 41598_2018_20727_MOESM2_ESM.pdf]

# **Differential long non-coding RNA expression profiles in human oocytes and cumulus cells**

Julien Bouckenheimer, Patricia Fauque, Charles-Henri Lecellier, Céline Bruno, Thérèse

Commes, Jean-Marc Lemaître, John De Vos, Said Assou

**Supplementary Table S1: List of the 2,421 protein-coding genes upregulated in MII oocytes**

| Gene ID         | Gene Name | Chromoso | Start_position | End_position | Gene_biotype   | Fold Change | q-value(%) |
|-----------------|-----------|----------|----------------|--------------|----------------|-------------|------------|
| ENSG00000178804 | H1FOO     | 3        | 129543214      | 129551467    | protein_coding | 74217,18    | 0,0000000  |
| ENSG00000187569 | DPPA3     | 12       | 7711454        | 7717559      | protein_coding | 58356,00    | 0,0000000  |
| ENSG00000160505 | NLRP4     | 19       | 55836578       | 55881854     | protein_coding | 56065,82    | 0,0000000  |
| ENSG00000261456 | TUBB8     | 10       | 46892          | 74163        | protein_coding | 33504,36    | 0,0000000  |
| ENSG00000185467 | KPNA7     | 7        | 99173574       | 99207506     | protein_coding | 33463,61    | 0,0000000  |
| ENSG00000100721 | TCL1A     | 14       | 95709967       | 95714196     | protein_coding | 32215,40    | 0,0000000  |
| ENSG00000203909 | DPPA5     | 6        | 73353062       | 73354295     | protein_coding | 30731,00    | 0,0000000  |
| ENSG00000173572 | NLRP13    | 19       | 55891699       | 55932336     | protein_coding | 23823,10    | 0,0000000  |
| ENSG00000214102 | WEE2      | 7        | 141708353      | 141731271    | protein_coding | 21431,22    | 0,0000000  |
| ENSG00000149507 | OOSP2     | 11       | 60040275       | 60048044     | protein_coding | 16859,40    | 0,0000000  |
| ENSG00000189167 | ZAR1L     | 13       | 32303700       | 32315344     | protein_coding | 11219,60    | 0,0000000  |
| ENSG00000117148 | ACTL8     | 1        | 17755313       | 17827063     | protein_coding | 8839,67     | 0,0000000  |
| ENSG00000103310 | ZP2       | 16       | 21197450       | 21214510     | protein_coding | 8571,30     | 0,0000000  |
| ENSG00000203907 | OOEP      | 6        | 73368555       | 73395133     | protein_coding | 7564,72     | 0,0000000  |
| ENSG00000116996 | ZP4       | 1        | 237877864      | 237890922    | protein_coding | 7444,40     | 0,0000000  |
| ENSG00000187690 | CXorf67   | X        | 51406915       | 51408843     | protein_coding | 6624,55     | 0,0000000  |
| ENSG00000223601 | EBLN1     | 10       | 22208814       | 22210021     | protein_coding | 6453,20     | 0,0000000  |
| ENSG00000137875 | BCL2L10   | 15       | 52109263       | 52112775     | protein_coding | 6383,54     | 0,0000000  |
| ENSG00000203908 | KHDC3L    | 6        | 73362677       | 73364171     | protein_coding | 5558,95     | 0,0000000  |
| ENSG00000165588 | OTX2      | 14       | 56799905       | 56810479     | protein_coding | 4931,20     | 0,0000000  |
| ENSG00000248485 | PCP4L1    | 1        | 161258727      | 161285450    | protein_coding | 4165,22     | 0,0000000  |
| ENSG00000179873 | NLRP11    | 19       | 55785397       | 55836800     | protein_coding | 3383,97     | 0,0000000  |
| ENSG00000137707 | BTG4      | 11       | 111467526      | 111512354    | protein_coding | 3346,52     | 0,0000000  |
| ENSG00000180438 | TPRXL     | 3        | 13937256       | 14082811     | protein_coding | 3071,22     | 0,0000000  |
| ENSG00000205022 | PABPN1L   | 16       | 88863333       | 88866660     | protein_coding | 2886,10     | 0,0000000  |
| ENSG00000137766 | UNC13C    | 15       | 54012904       | 54633414     | protein_coding | 2813,75     | 0,0000000  |
| ENSG00000141738 | GRB7      | 17       | 39737927       | 39747291     | protein_coding | 2718,28     | 0,0000000  |
| ENSG00000102290 | PCDH11X   | X        | 91779261       | 92623230     | protein_coding | 2392,86     | 0,0000000  |
| ENSG00000172680 | MOS       | 8        | 56112942       | 56113982     | protein_coding | 2392,40     | 0,0000000  |
| ENSG00000104413 | ESRP1     | 8        | 94641074       | 94707466     | protein_coding | 2206,58     | 0,0000000  |
| ENSG00000114455 | HHLA2     | 3        | 108296490      | 108378285    | protein_coding | 2060,80     | 0,0000000  |
| ENSG00000152670 | DDX4      | 5        | 55738017       | 55817157     | protein_coding | 1971,90     | 0,0000000  |
| ENSG00000092345 | DAZL      | 3        | 16586792       | 16670306     | protein_coding | 1906,00     | 0,0000000  |
| ENSG00000124610 | HIST1H1A  | 6        | 26017085       | 26017732     | protein_coding | 1866,80     | 0,0006696  |
| ENSG00000185155 | MIXL1     | 1        | 226223618      | 226227054    | protein_coding | 1847,59     | 0,0000000  |
| ENSG00000149506 | ZP1       | 11       | 60867562       | 60875693     | protein_coding | 1815,09     | 0,0000000  |
| ENSG00000143194 | MAEL      | 1        | 166975582      | 167022214    | protein_coding | 1812,71     | 0,0000000  |
| ENSG00000214414 | TRIM77    | 11       | 89710299       | 89717872     | protein_coding | 1795,50     | 0,0000000  |
| ENSG00000276747 | PADI6     | 1        | 17372196       | 17401699     | protein_coding | 1614,00     | 0,0000000  |
| ENSG00000167634 | NLRP7     | 19       | 54923509       | 54966312     | protein_coding | 1592,13     | 0,0000000  |
| ENSG00000143006 | DMRTB1    | 1        | 53459399       | 53467488     | protein_coding | 1498,10     | 0,0000000  |
| ENSG00000221818 | EBF2      | 8        | 25841730       | 26045397     | protein_coding | 1300,27     | 0,0000000  |
| ENSG00000205126 | ACCSL     | 11       | 44047981       | 44059977     | protein_coding | 1249,74     | 0,0000000  |
| ENSG00000120051 | CFAP58    | 10       | 104353764      | 104455090    | protein_coding | 1223,48     | 0,0000000  |
| ENSG00000165970 | SLC6A5    | 11       | 20599400       | 20659285     | protein_coding | 1088,65     | 0,0000000  |
| ENSG00000127743 | IL17B     | 5        | 149371324      | 149404202    | protein_coding | 1071,92     | 0,0000000  |
| ENSG00000104953 | TLE6      | 19       | 2977446        | 2995184      | protein_coding | 1055,38     | 0,0000000  |
| ENSG00000008196 | TFAP2B    | 6        | 50818723       | 50847613     | protein_coding | 1035,20     | 0,0006696  |
| ENSG00000159166 | LAD1      | 1        | 201373244      | 201399915    | protein_coding | 1017,90     | 0,0000000  |
| ENSG00000112333 | NR2E1     | 6        | 108166058      | 108188809    | protein_coding | 1012,75     | 0,0000000  |
| ENSG00000137434 | C6orf52   | 6        | 10671418       | 10694797     | protein_coding | 997,85      | 0,0000000  |
| ENSG00000162949 | CAPN13    | 2        | 30722771       | 30820542     | protein_coding | 993,55      | 0,0000000  |

|                 |          |    |           |           |                |        |           |
|-----------------|----------|----|-----------|-----------|----------------|--------|-----------|
| ENSG00000161905 | ALOX15   | 17 | 4630902   | 4642294   | protein_coding | 947,32 | 0,0000000 |
| ENSG00000154102 | C1orf74  | 16 | 85690084  | 85751129  | protein_coding | 929,26 | 0,0000000 |
| ENSG00000178796 | RIIAD1   | 1  | 151710433 | 151729805 | protein_coding | 925,33 | 0,0000000 |
| ENSG00000121690 | DEPDC7   | 11 | 33015864  | 33033582  | protein_coding | 887,73 | 0,0000000 |
| ENSG00000146038 | DCDC2    | 6  | 24171756  | 24358052  | protein_coding | 882,93 | 0,0000000 |
| ENSG00000164611 | PTTG1    | 5  | 160421822 | 160428744 | protein_coding | 867,31 | 0,0000000 |
| ENSG00000137948 | BRDT     | 1  | 91949371  | 92014426  | protein_coding | 793,70 | 0,0000000 |
| ENSG00000087495 | PHACTR3  | 20 | 59577509  | 59847711  | protein_coding | 750,58 | 0,0000000 |
| ENSG00000147655 | RSPO2    | 8  | 107899316 | 108083648 | protein_coding | 744,21 | 0,0000000 |
| ENSG00000112494 | UNC93A   | 6  | 167271169 | 167316019 | protein_coding | 743,30 | 0,0000000 |
| ENSG00000184571 | PIWIL3   | 22 | 24719034  | 24774720  | protein_coding | 732,10 | 0,0000000 |
| ENSG00000104321 | TRPA1    | 8  | 72019917  | 72075617  | protein_coding | 728,50 | 0,0000000 |
| ENSG00000185792 | NLRP9    | 19 | 55708432  | 55738402  | protein_coding | 726,93 | 0,0000000 |
| ENSG00000148702 | HABP2    | 10 | 113550837 | 113589602 | protein_coding | 725,17 | 0,0000000 |
| ENSG00000176979 | TRIM60   | 4  | 165031953 | 165041744 | protein_coding | 709,30 | 0,0000000 |
| ENSG00000154319 | FAM167A  | 8  | 11421463  | 11474715  | protein_coding | 674,64 | 0,0000000 |
| ENSG00000183185 | GABRR3   | 3  | 97986673  | 98035304  | protein_coding | 667,30 | 0,0000000 |
| ENSG00000124092 | CTCF     | 20 | 57495966  | 57525652  | protein_coding | 666,44 | 0,0000000 |
| ENSG00000176204 | LRRTM4   | 2  | 76747719  | 77593319  | protein_coding | 663,40 | 0,0000000 |
| ENSG00000253313 | C1orf210 | 1  | 43281883  | 43285617  | protein_coding | 636,82 | 0,0000000 |
| ENSG00000163380 | LMOD3    | 3  | 69106872  | 69123032  | protein_coding | 627,91 | 0,0000000 |
| ENSG00000164113 | ADAD1    | 4  | 122378966 | 122429802 | protein_coding | 626,92 | 0,0000000 |
| ENSG00000188372 | ZP3      | 7  | 76397518  | 76442071  | protein_coding | 613,16 | 0,0000000 |
| ENSG00000183324 | REC114   | 15 | 73443158  | 73560014  | protein_coding | 605,33 | 0,0000000 |
| ENSG00000144583 | 04-mars  | 2  | 216257865 | 216372027 | protein_coding | 575,41 | 0,0000000 |
| ENSG00000255298 | OR8G5    | 11 | 124264827 | 124265867 | protein_coding | 573,90 | 0,0000000 |
| ENSG00000157927 | RADIL    | 7  | 4797055   | 4883719   | protein_coding | 571,96 | 0,0000000 |
| ENSG00000120669 | SOHLH2   | 13 | 36168208  | 36214615  | protein_coding | 558,21 | 0,0000000 |
| ENSG00000158486 | DNAH3    | 16 | 20933111  | 21159441  | protein_coding | 556,13 | 0,0000000 |
| ENSG00000204710 | SPDYC    | 11 | 65170154  | 65173244  | protein_coding | 545,40 | 0,0000000 |
| ENSG00000176302 | FOXR1    | 11 | 118971707 | 118981291 | protein_coding | 534,47 | 0,0000000 |
| ENSG00000117322 | CR2      | 1  | 207454230 | 207489895 | protein_coding | 534,00 | 0,0000000 |
| ENSG00000171487 | NLRP5    | 19 | 55999726  | 56061813  | protein_coding | 524,71 | 0,0000000 |
| ENSG00000130385 | BMP15    | X  | 50910784  | 50916607  | protein_coding | 516,50 | 0,0006696 |
| ENSG00000095627 | TDRD1    | 10 | 114179270 | 114232304 | protein_coding | 495,42 | 0,0000000 |
| ENSG00000016082 | ISL1     | 5  | 51383391  | 51394738  | protein_coding | 484,09 | 0,0000000 |
| ENSG00000163377 | FAM19A4  | 3  | 68731766  | 68953297  | protein_coding | 479,70 | 0,0000000 |
| ENSG00000166840 | GLYATL1  | 11 | 58905398  | 59043527  | protein_coding | 472,91 | 0,0000000 |
| ENSG00000089225 | TBX5     | 12 | 114353931 | 114408442 | protein_coding | 469,50 | 0,0000000 |
| ENSG00000075340 | ADD2     | 2  | 70607618  | 70768225  | protein_coding | 464,06 | 0,0000000 |
| ENSG00000198054 | DSCR8    | 21 | 38121451  | 38188016  | protein_coding | 463,10 | 0,0000000 |
| ENSG00000140538 | NTRK3    | 15 | 87859751  | 88256768  | protein_coding | 456,71 | 0,0000000 |
| ENSG00000079102 | RUNX1T1  | 8  | 91954967  | 92103286  | protein_coding | 456,41 | 0,0000000 |
| ENSG00000077800 | FKBP6    | 7  | 73328164  | 73358637  | protein_coding | 456,40 | 0,0000000 |
| ENSG00000103528 | SYT17    | 16 | 19167971  | 19268334  | protein_coding | 442,58 | 0,0012807 |
| ENSG00000179709 | NLRP8    | 19 | 55947832  | 55988629  | protein_coding | 442,10 | 0,0000000 |
| ENSG00000164265 | SCGB3A2  | 5  | 147870682 | 147882191 | protein_coding | 436,30 | 0,0000000 |
| ENSG00000155875 | SAXO1    | 9  | 18927658  | 19049354  | protein_coding | 429,42 | 0,0000000 |
| ENSG00000148123 | PLPPR1   | 9  | 101028709 | 101325135 | protein_coding | 427,60 | 0,0000000 |
| ENSG00000165973 | NELL1    | 11 | 20669551  | 21575681  | protein_coding | 421,90 | 0,0000000 |
| ENSG00000001626 | CFTR     | 7  | 117465784 | 117715971 | protein_coding | 417,13 | 0,0000000 |
| ENSG00000175077 | RTP1     | 3  | 187197486 | 187201465 | protein_coding | 412,90 | 0,0000000 |
| ENSG00000102466 | FGF14    | 13 | 101710804 | 102402457 | protein_coding | 406,98 | 0,0000000 |
| ENSG00000206557 | TRIM71   | 3  | 32818018  | 32897826  | protein_coding | 400,19 | 0,0000000 |
| ENSG00000171987 | C11orf40 | 11 | 4571423   | 4577820   | protein_coding | 400,10 | 0,0000000 |

|                 |          |    |           |           |                |        |           |
|-----------------|----------|----|-----------|-----------|----------------|--------|-----------|
| ENSG00000184221 | OLIG1    | 21 | 33070144  | 33072420  | protein_coding | 397,86 | 0,0000000 |
| ENSG00000183625 | CCR3     | 3  | 46163604  | 46266706  | protein_coding | 396,63 | 0,0000000 |
| ENSG00000101443 | WFDC2    | 20 | 45469706  | 45481532  | protein_coding | 396,50 | 0,0000000 |
| ENSG00000164049 | FBXW12   | 3  | 48372219  | 48401259  | protein_coding | 396,16 | 0,0000000 |
| ENSG00000237521 | OR7E24   | 19 | 9250930   | 9252479   | protein_coding | 384,20 | 0,0000000 |
| ENSG00000197893 | NRAP     | 10 | 113588716 | 113664127 | protein_coding | 369,50 | 0,0000000 |
| ENSG00000005471 | ABCB4    | 7  | 87401697  | 87480435  | protein_coding | 369,32 | 0,0000000 |
| ENSG00000162592 | CCDC27   | 1  | 3752398   | 3771645   | protein_coding | 366,18 | 0,0000000 |
| ENSG00000132164 | SLC6A11  | 3  | 10816200  | 10940733  | protein_coding | 364,40 | 0,0000000 |
| ENSG00000087586 | AURKA    | 20 | 56369389  | 56392337  | protein_coding | 359,04 | 0,0000000 |
| ENSG00000162624 | LHX8     | 1  | 75128434  | 75161533  | protein_coding | 357,20 | 0,0000000 |
| ENSG00000078725 | BRINP1   | 9  | 119153458 | 119369467 | protein_coding | 350,04 | 0,0000000 |
| ENSG00000114656 | KIAA1257 | 3  | 128909866 | 129002690 | protein_coding | 346,15 | 0,0000000 |
| ENSG00000083307 | GRHL2    | 8  | 101492432 | 101669726 | protein_coding | 343,75 | 0,0012807 |
| ENSG00000105251 | SHD      | 19 | 4278601   | 4290724   | protein_coding | 339,85 | 0,0000000 |
| ENSG00000174498 | IGDCC3   | 15 | 65327127  | 65378040  | protein_coding | 338,16 | 0,0000000 |
| ENSG00000156269 | NAA11    | 4  | 79225694  | 79326050  | protein_coding | 334,40 | 0,0000000 |
| ENSG00000008197 | TFAP2D   | 6  | 50713828  | 50772988  | protein_coding | 323,60 | 0,0006696 |
| ENSG00000175766 | EIF4E1B  | 5  | 176630682 | 176646641 | protein_coding | 312,40 | 0,0000000 |
| ENSG00000073282 | TP63     | 3  | 189631416 | 189897279 | protein_coding | 309,82 | 0,0000000 |
| ENSG00000156395 | SORCS3   | 10 | 104641101 | 105265235 | protein_coding | 308,80 | 0,0000000 |
| ENSG00000149735 | GPHA2    | 11 | 64934471  | 64935888  | protein_coding | 305,90 | 0,0000000 |
| ENSG00000187546 | AGMO     | 7  | 15200318  | 15562015  | protein_coding | 305,40 | 0,0000000 |
| ENSG00000136231 | IGF2BP3  | 7  | 23310209  | 23470467  | protein_coding | 300,89 | 0,0000000 |
| ENSG00000183733 | FIGLA    | 2  | 70777310  | 70790643  | protein_coding | 300,60 | 0,0000000 |
| ENSG00000047936 | ROS1     | 6  | 117288300 | 117425855 | protein_coding | 299,20 | 0,0000000 |
| ENSG00000106689 | LHX2     | 9  | 124001670 | 124033301 | protein_coding | 296,50 | 0,0006696 |
| ENSG00000170627 | GTSF1    | 12 | 54455950  | 54473602  | protein_coding | 295,26 | 0,0000000 |
| ENSG00000164675 | IQUB     | 7  | 123452400 | 123535077 | protein_coding | 281,42 | 0,0000000 |
| ENSG00000165623 | UCMA     | 10 | 13221767  | 13234334  | protein_coding | 279,40 | 0,0000000 |
| ENSG00000089169 | RPH3A    | 12 | 112570380 | 112898881 | protein_coding | 274,23 | 0,0000000 |
| ENSG00000196335 | STK31    | 7  | 23710167  | 23832513  | protein_coding | 270,58 | 0,0000000 |
| ENSG00000135638 | EMX1     | 2  | 72916260  | 72936071  | protein_coding | 266,81 | 0,0000000 |
| ENSG00000203910 | C1orf146 | 1  | 92217940  | 92245813  | protein_coding | 264,29 | 0,0000000 |
| ENSG00000176571 | CNBD1    | 8  | 86866442  | 87615219  | protein_coding | 259,00 | 0,0000000 |
| ENSG00000080166 | DCT      | 13 | 94436808  | 94479682  | protein_coding | 257,19 | 0,0000000 |
| ENSG00000179796 | LRRC3B   | 3  | 26622806  | 26710776  | protein_coding | 255,50 | 0,0000000 |
| ENSG00000177414 | UBE2U    | 1  | 64203627  | 64267368  | protein_coding | 247,70 | 0,0000000 |
| ENSG00000137392 | CLPS     | 6  | 35794982  | 35797344  | protein_coding | 247,40 | 0,0000000 |
| ENSG00000149548 | CCDC15   | 11 | 124954121 | 125041489 | protein_coding | 244,54 | 0,0000000 |
| ENSG00000158865 | SLC5A11  | 16 | 24845841  | 24911628  | protein_coding | 244,20 | 0,0000000 |
| ENSG00000182223 | ZAR1     | 4  | 48490252  | 48494389  | protein_coding | 242,45 | 0,0000000 |
| ENSG00000147676 | MAL2     | 8  | 119165034 | 119245673 | protein_coding | 241,00 | 0,0000000 |
| ENSG00000129354 | AP1M2    | 19 | 10572671  | 10587315  | protein_coding | 235,60 | 0,0000000 |
| ENSG00000148584 | A1CF     | 10 | 50799409  | 50885675  | protein_coding | 231,10 | 0,0006696 |
| ENSG00000156509 | FBXO43   | 8  | 100133360 | 100145800 | protein_coding | 228,74 | 0,0000000 |
| ENSG00000104313 | EYA1     | 8  | 71197433  | 71362232  | protein_coding | 226,73 | 0,0000000 |
| ENSG00000122592 | HOXA7    | 7  | 27153716  | 27157936  | protein_coding | 226,31 | 0,0000000 |
| ENSG00000154274 | C4orf19  | 4  | 37453941  | 37623495  | protein_coding | 225,18 | 0,0000000 |
| ENSG00000150275 | PCDH15   | 10 | 53802771  | 55627942  | protein_coding | 223,20 | 0,0000000 |
| ENSG00000164330 | EBF1     | 5  | 158695916 | 159099761 | protein_coding | 220,90 | 0,0000000 |
| ENSG00000178462 | TUBAL3   | 10 | 5393098   | 5404830   | protein_coding | 216,80 | 0,0000000 |
| ENSG00000183508 | FAM46C   | 1  | 117605934 | 117628372 | protein_coding | 216,09 | 0,0000000 |
| ENSG00000206075 | SERPINB5 | 18 | 63476761  | 63505085  | protein_coding | 216,00 | 0,0000000 |
| ENSG00000066468 | FGFR2    | 10 | 121478334 | 121598458 | protein_coding | 215,06 | 0,0000000 |

|                 |          |    |           |           |                |        |           |
|-----------------|----------|----|-----------|-----------|----------------|--------|-----------|
| ENSG00000105894 | PTN      | 7  | 137227341 | 137343865 | protein_coding | 214,93 | 0,0000000 |
| ENSG00000173769 | TOPAZ1   | 3  | 44241886  | 44332098  | protein_coding | 212,20 | 0,0006696 |
| ENSG00000125207 | PIWIL1   | 12 | 130337887 | 130372637 | protein_coding | 211,00 | 0,0000000 |
| ENSG00000131914 | LIN28A   | 1  | 26410778  | 26429722  | protein_coding | 210,90 | 0,0000000 |
| ENSG00000250254 | PTTG2    | 4  | 37960435  | 37961125  | protein_coding | 210,54 | 0,2229774 |
| ENSG00000174898 | CATSPERD | 19 | 5720677   | 5778734   | protein_coding | 209,91 | 0,0000000 |
| ENSG00000113520 | IL4      | 5  | 132673986 | 132682676 | protein_coding | 209,36 | 0,0000000 |
| ENSG00000276043 | UHRF1    | 19 | 4903080   | 4962154   | protein_coding | 205,52 | 0,0000000 |
| ENSG00000173406 | DAB1     | 1  | 56994778  | 58546734  | protein_coding | 205,20 | 0,0000000 |
| ENSG00000039600 | SOX30    | 5  | 157625679 | 157671480 | protein_coding | 204,03 | 0,0000000 |
| ENSG00000206384 | COL6A6   | 3  | 130560334 | 130678155 | protein_coding | 199,69 | 0,0000000 |
| ENSG00000273045 | C2orf15  | 2  | 99141485  | 99151487  | protein_coding | 199,18 | 0,0000000 |
| ENSG00000240204 | SMKR1    | 7  | 129502479 | 129512932 | protein_coding | 198,04 | 0,0000000 |
| ENSG00000156049 | GNA14    | 9  | 77423079  | 77648307  | protein_coding | 197,81 | 0,0000000 |
| ENSG00000157703 | SVOPL    | 7  | 138594285 | 138701352 | protein_coding | 194,94 | 0,0000000 |
| ENSG00000144285 | SCN1A    | 2  | 165989160 | 166128047 | protein_coding | 193,40 | 0,0006696 |
| ENSG00000179915 | NRXN1    | 2  | 49918505  | 51225564  | protein_coding | 192,18 | 0,0000000 |
| ENSG00000091704 | CPA1     | 7  | 130380339 | 130388114 | protein_coding | 190,83 | 0,0000000 |
| ENSG00000197561 | ELANE    | 19 | 851014    | 856247    | protein_coding | 188,00 | 0,0006696 |
| ENSG00000015413 | DPEP1    | 16 | 89613308  | 89638456  | protein_coding | 186,62 | 0,0012807 |
| ENSG00000176399 | DMRTA1   | 9  | 22446841  | 22455740  | protein_coding | 184,67 | 0,0000000 |
| ENSG00000166796 | LDHC     | 11 | 18412307  | 18452058  | protein_coding | 184,61 | 0,0000000 |
| ENSG00000138795 | LEF1     | 4  | 108047545 | 108168956 | protein_coding | 183,12 | 0,0000000 |
| ENSG00000107018 | RLN1     | 9  | 5334969   | 5339873   | protein_coding | 183,07 | 0,0000000 |
| ENSG00000183117 | CSMD1    | 8  | 2935353   | 4994972   | protein_coding | 182,40 | 0,0000000 |
| ENSG00000181847 | TIGIT    | 3  | 114276913 | 114310288 | protein_coding | 177,00 | 0,0012807 |
| ENSG00000273079 | GRIN2B   | 12 | 13537337  | 13981957  | protein_coding | 174,30 | 0,0000000 |
| ENSG00000043039 | BARX2    | 11 | 129375940 | 129452279 | protein_coding | 173,50 | 0,0006696 |
| ENSG00000101746 | NOL4     | 18 | 33851100  | 34224952  | protein_coding | 172,00 | 0,0000000 |
| ENSG00000188032 | C19orf67 | 19 | 14081619  | 14085875  | protein_coding | 169,17 | 0,0012807 |
| ENSG00000172987 | HPSE2    | 10 | 98457077  | 99235862  | protein_coding | 168,69 | 0,0000000 |
| ENSG00000183166 | CALN1    | 7  | 71779491  | 72447151  | protein_coding | 168,18 | 0,0000000 |
| ENSG00000149054 | ZNF215   | 11 | 6926404   | 6984632   | protein_coding | 167,97 | 0,0000000 |
| ENSG00000131055 | COX4I2   | 20 | 31637888  | 31645006  | protein_coding | 166,40 | 0,0000000 |
| ENSG00000102104 | RS1      | X  | 18639910  | 18672109  | protein_coding | 163,47 | 0,0000000 |
| ENSG00000148482 | SLC39A12 | 10 | 17951839  | 18043292  | protein_coding | 162,40 | 0,0000000 |
| ENSG00000196277 | GRM7     | 3  | 6770001   | 7741533   | protein_coding | 160,36 | 0,0000000 |
| ENSG00000118307 | CASC1    | 12 | 25108420  | 25195162  | protein_coding | 159,66 | 0,0000000 |
| ENSG00000158806 | NPM2     | 8  | 22024125  | 22036897  | protein_coding | 159,65 | 0,0012807 |
| ENSG00000167889 | MGAT5B   | 17 | 76868456  | 76950393  | protein_coding | 157,36 | 0,0000000 |
| ENSG00000145721 | LIX1     | 5  | 97091867  | 97142872  | protein_coding | 156,30 | 0,0006696 |
| ENSG00000070808 | CAMK2A   | 5  | 150219491 | 150290291 | protein_coding | 155,90 | 0,0000000 |
| ENSG00000198178 | CLEC4C   | 12 | 7729415   | 7751605   | protein_coding | 154,70 | 0,0000000 |
| ENSG00000158077 | NLRP14   | 11 | 7020446   | 7071308   | protein_coding | 153,31 | 0,0000000 |
| ENSG00000133808 | MICALCL  | 11 | 12276080  | 12359144  | protein_coding | 153,24 | 0,0000000 |
| ENSG00000109794 | FAM149A  | 4  | 186104419 | 186172667 | protein_coding | 151,80 | 0,0000000 |
| ENSG00000152953 | STK32B   | 4  | 5051442   | 5500998   | protein_coding | 149,77 | 0,0000000 |
| ENSG00000152669 | CCNO     | 5  | 55231152  | 55233680  | protein_coding | 149,06 | 0,0000000 |
| ENSG00000124493 | GRM4     | 6  | 34018645  | 34155622  | protein_coding | 148,80 | 0,0000000 |
| ENSG00000164404 | GDF9     | 5  | 132861181 | 132866884 | protein_coding | 147,06 | 0,0000000 |
| ENSG00000169862 | CTNND2   | 5  | 10971840  | 11904043  | protein_coding | 146,91 | 0,0000000 |
| ENSG00000159495 | TGM7     | 15 | 43276280  | 43302255  | protein_coding | 144,40 | 0,0000000 |
| ENSG00000168702 | LRP1B    | 2  | 140231423 | 142131701 | protein_coding | 143,88 | 0,0000000 |
| ENSG00000162639 | HENMT1   | 1  | 108648290 | 108661526 | protein_coding | 143,45 | 0,0000000 |
| ENSG00000168843 | FSTL5    | 4  | 161383897 | 162164035 | protein_coding | 142,40 | 0,0006696 |

|                 |          |    |           |           |                |        |           |
|-----------------|----------|----|-----------|-----------|----------------|--------|-----------|
| ENSG00000156218 | ADAMTSL3 | 15 | 83654086  | 84039842  | protein_coding | 142,31 | 0,0000000 |
| ENSG00000185518 | SV2B     | 15 | 91099950  | 91301309  | protein_coding | 142,00 | 0,0000000 |
| ENSG00000102468 | HTR2A    | 13 | 46831550  | 46897076  | protein_coding | 141,80 | 0,0000000 |
| ENSG00000146049 | KAAG1    | 6  | 24356903  | 24358284  | protein_coding | 141,08 | 0,0050271 |
| ENSG00000040608 | RTN4R    | 22 | 20241415  | 20283246  | protein_coding | 140,88 | 0,0000000 |
| ENSG00000135960 | EDAR     | 2  | 108894471 | 108989372 | protein_coding | 140,25 | 0,0000000 |
| ENSG00000188886 | ASTL     | 2  | 96123850  | 96138436  | protein_coding | 140,19 | 0,0012807 |
| ENSG00000176566 | DCAF4L2  | 8  | 87870743  | 87874068  | protein_coding | 138,65 | 0,0000000 |
| ENSG00000138798 | EGF      | 4  | 109912884 | 110012266 | protein_coding | 135,88 | 0,0000000 |
| ENSG00000198807 | PAX9     | 14 | 36657568  | 36679715  | protein_coding | 135,55 | 0,0000000 |
| ENSG00000132514 | CLEC10A  | 17 | 7074537   | 7080307   | protein_coding | 135,51 | 0,0000000 |
| ENSG00000134258 | VTCN1    | 1  | 117143587 | 117210960 | protein_coding | 135,42 | 0,0000000 |
| ENSG00000069018 | TRPC7    | 5  | 136213320 | 136365537 | protein_coding | 133,90 | 0,0012807 |
| ENSG00000132972 | RNF17    | 13 | 24764152  | 24879921  | protein_coding | 132,75 | 0,0000000 |
| ENSG00000151952 | TMEM132D | 12 | 129071725 | 129903666 | protein_coding | 132,50 | 0,0006696 |
| ENSG00000178217 | SH2D4B   | 10 | 80537902  | 80646560  | protein_coding | 129,18 | 0,0006696 |
| ENSG00000058335 | RASGRF1  | 15 | 78959947  | 79090773  | protein_coding | 128,92 | 0,0000000 |
| ENSG00000187889 | C1orf168 | 1  | 56718804  | 56819696  | protein_coding | 127,70 | 0,0006696 |
| ENSG00000275896 | PRSS2    | 7  | 142748662 | 142774564 | protein_coding | 127,40 | 0,0000000 |
| ENSG00000173207 | CKS1B    | 1  | 154974653 | 154979249 | protein_coding | 126,64 | 0,0000000 |
| ENSG00000139287 | TPH2     | 12 | 71938846  | 72186618  | protein_coding | 126,58 | 0,0000000 |
| ENSG00000126787 | DLGAP5   | 14 | 55148112  | 55191678  | protein_coding | 124,20 | 0,0000000 |
| ENSG00000080709 | KCNN2    | 5  | 114360945 | 114496500 | protein_coding | 123,72 | 0,0000000 |
| ENSG00000149972 | CNTN5    | 11 | 99020953  | 100358885 | protein_coding | 123,45 | 0,0012807 |
| ENSG00000170927 | PKHD1    | 6  | 51615300  | 52087625  | protein_coding | 121,50 | 0,0000000 |
| ENSG00000126016 | AMOT     | X  | 112774503 | 112840815 | protein_coding | 120,31 | 0,0000000 |
| ENSG00000187094 | CCK      | 3  | 42257825  | 42266207  | protein_coding | 118,40 | 0,0000000 |
| ENSG00000141255 | SPATA22  | 17 | 3440019   | 3513852   | protein_coding | 116,21 | 0,0000000 |
| ENSG00000269964 | MEI4     | 6  | 77690658  | 77926974  | protein_coding | 114,79 | 0,0000000 |
| ENSG00000179023 | KLHDC7A  | 1  | 18480982  | 18486126  | protein_coding | 113,40 | 0,0000000 |
| ENSG00000243910 | TUBA4B   | 2  | 219253243 | 219272188 | protein_coding | 112,00 | 0,0000000 |
| ENSG00000132698 | RAB25    | 1  | 156061160 | 156070514 | protein_coding | 110,06 | 0,0000000 |
| ENSG00000196074 | SYCP2    | 20 | 59863563  | 59933655  | protein_coding | 109,83 | 0,0000000 |
| ENSG00000177398 | UMODL1   | 21 | 42062959  | 42143453  | protein_coding | 109,59 | 0,0000000 |
| ENSG00000153237 | CCDC148  | 2  | 158171081 | 158456753 | protein_coding | 109,22 | 0,0000000 |
| ENSG00000080007 | DDX43    | 6  | 73394748  | 73417569  | protein_coding | 108,31 | 0,0000000 |
| ENSG00000169594 | BNC1     | 15 | 83255903  | 83284716  | protein_coding | 107,93 | 0,0000000 |
| ENSG00000112273 | HDGFL1   | 6  | 22569493  | 22571666  | protein_coding | 107,10 | 0,0000000 |
| ENSG00000102837 | OLFM4    | 13 | 53028759  | 53052057  | protein_coding | 107,09 | 0,0000000 |
| ENSG00000180113 | TDRD6    | 6  | 46687875  | 46704319  | protein_coding | 106,74 | 0,0000000 |
| ENSG00000152503 | TRIM36   | 5  | 115124762 | 115180546 | protein_coding | 106,67 | 0,0000000 |
| ENSG00000203805 | PLPP4    | 10 | 120456954 | 120589855 | protein_coding | 106,59 | 0,0000000 |
| ENSG00000187123 | LYPD6    | 2  | 149329985 | 149474148 | protein_coding | 106,49 | 0,0000000 |
| ENSG00000106927 | AMBP     | 9  | 114060127 | 114078472 | protein_coding | 105,43 | 0,0000000 |
| ENSG00000205129 | C4orf47  | 4  | 185426249 | 185449826 | protein_coding | 105,31 | 0,0000000 |
| ENSG00000166800 | LDHAL6A  | 11 | 18455824  | 18479600  | protein_coding | 104,81 | 0,0000000 |
| ENSG00000060709 | RIMBP2   | 12 | 130396137 | 130716281 | protein_coding | 104,22 | 0,0000000 |
| ENSG00000118308 | LRMP     | 12 | 25021002  | 25108334  | protein_coding | 103,04 | 0,0000000 |
| ENSG00000132321 | IQCA1    | 2  | 236324147 | 236507542 | protein_coding | 101,63 | 0,0000000 |
| ENSG00000137473 | TTC29    | 4  | 146706638 | 146945882 | protein_coding | 101,40 | 0,0000000 |
| ENSG00000157219 | HTR5A    | 7  | 155070324 | 155085749 | protein_coding | 101,00 | 0,0012807 |
| ENSG00000256463 | SALL3    | 18 | 78980275  | 79002677  | protein_coding | 100,89 | 0,0012807 |
| ENSG00000077152 | UBE2T    | 1  | 202331657 | 202341980 | protein_coding | 100,43 | 0,0000000 |
| ENSG00000132646 | PCNA     | 20 | 5114953   | 5126626   | protein_coding | 99,73  | 0,0000000 |
| ENSG00000149403 | GRIK4    | 11 | 120511759 | 120988904 | protein_coding | 99,39  | 0,0000000 |

|                 |            |    |           |           |                |       |           |
|-----------------|------------|----|-----------|-----------|----------------|-------|-----------|
| ENSG00000215018 | COL28A1    | 7  | 7356203   | 7535853   | protein_coding | 99,29 | 0,0000000 |
| ENSG00000105146 | AURKC      | 19 | 57230802  | 57235548  | protein_coding | 99,19 | 0,0000000 |
| ENSG00000187695 | ENSG000001 | 3  | 128909874 | 128971330 | protein_coding | 98,46 | 0,0111464 |
| ENSG00000157168 | NRG1       | 8  | 31639386  | 32767959  | protein_coding | 97,68 | 0,0000000 |
| ENSG00000177181 | RIMKLA     | 1  | 42380795  | 42422578  | protein_coding | 97,63 | 0,0000000 |
| ENSG00000108849 | PPY        | 17 | 43940804  | 43942468  | protein_coding | 97,60 | 0,0000000 |
| ENSG00000188869 | TMC3       | 15 | 81331217  | 81374213  | protein_coding | 97,47 | 0,0012807 |
| ENSG00000179148 | ALOXE3     | 17 | 8095900   | 8119047   | protein_coding | 97,07 | 0,0000000 |
| ENSG00000269699 | ZIM2       | 19 | 56774552  | 56840729  | protein_coding | 96,53 | 0,0000000 |
| ENSG00000244476 | ERVFRD-1   | 6  | 11102489  | 11111732  | protein_coding | 95,60 | 0,0000000 |
| ENSG00000169427 | KCNK9      | 8  | 139600838 | 139703056 | protein_coding | 94,83 | 0,0105771 |
| ENSG00000169836 | TACR3      | 4  | 103586031 | 103719816 | protein_coding | 94,38 | 0,0000000 |
| ENSG00000082126 | MPP4       | 2  | 201644870 | 201698694 | protein_coding | 94,04 | 0,0000000 |
| ENSG00000156299 | TIAM1      | 21 | 31118416  | 31559977  | protein_coding | 93,16 | 0,0000000 |
| ENSG00000214866 | DCDC2C     | 2  | 3703592   | 3847408   | protein_coding | 92,50 | 0,0006696 |
| ENSG00000197181 | PIWIL2     | 8  | 22275297  | 22357563  | protein_coding | 92,35 | 0,0000000 |
| ENSG00000259040 | BLOC1S5-TX | 6  | 7881522   | 8064364   | protein_coding | 92,04 | 0,0000000 |
| ENSG00000180828 | BHLHE22    | 8  | 64580367  | 64583628  | protein_coding | 91,40 | 0,0000000 |
| ENSG00000276087 | ENSG000001 | 2  | 24124366  | 24190436  | protein_coding | 91,31 | 0,0012807 |
| ENSG00000048052 | HDAC9      | 7  | 18086949  | 19002416  | protein_coding | 90,87 | 0,0000000 |
| ENSG00000163092 | XIRP2      | 2  | 166888487 | 167259753 | protein_coding | 90,30 | 0,0025348 |
| ENSG00000215915 | ATAD3C     | 1  | 1449689   | 1470158   | protein_coding | 90,10 | 0,0000000 |
| ENSG00000128645 | HOXD1      | 2  | 176188579 | 176190907 | protein_coding | 89,23 | 0,0000000 |
| ENSG00000180210 | F2         | 11 | 46719180  | 46739506  | protein_coding | 89,09 | 0,0012807 |
| ENSG00000039068 | CDH1       | 16 | 68737225  | 68835548  | protein_coding | 88,99 | 0,0012807 |
| ENSG00000134057 | CCNB1      | 5  | 69167010  | 69178245  | protein_coding | 88,50 | 0,0000000 |
| ENSG00000197361 | FBXL22     | 15 | 63597353  | 63602428  | protein_coding | 88,26 | 0,0000000 |
| ENSG00000171505 | OR1N1      | 9  | 122526358 | 122527296 | protein_coding | 88,20 | 0,0000000 |
| ENSG00000101115 | SALL4      | 20 | 51782331  | 51802520  | protein_coding | 87,60 | 0,0012807 |
| ENSG00000214575 | CPEB1      | 15 | 82543201  | 82648861  | protein_coding | 87,13 | 0,0000000 |
| ENSG00000147082 | CCNB3      | X  | 50202713  | 50351910  | protein_coding | 87,11 | 0,0012807 |
| ENSG00000185053 | SGCZ       | 8  | 14089864  | 15238339  | protein_coding | 86,73 | 0,0000000 |
| ENSG00000119915 | ELOVL3     | 10 | 102226328 | 102229589 | protein_coding | 86,06 | 0,0012807 |
| ENSG00000101405 | OXT        | 20 | 3071620   | 3072517   | protein_coding | 86,05 | 0,0000000 |
| ENSG00000113905 | HRG        | 3  | 186660216 | 186678240 | protein_coding | 85,30 | 0,0000000 |
| ENSG00000134460 | IL2RA      | 10 | 6010689   | 6062325   | protein_coding | 84,95 | 0,0000000 |
| ENSG00000196944 | OR2T4      | 1  | 248361581 | 248362627 | protein_coding | 84,90 | 0,0000000 |
| ENSG00000056050 | C4orf27    | 4  | 169729465 | 169757953 | protein_coding | 84,25 | 0,0000000 |
| ENSG00000164841 | TMEM74     | 8  | 108606850 | 108787615 | protein_coding | 84,20 | 0,0012807 |
| ENSG00000118690 | ARMC2      | 6  | 108848416 | 108974472 | protein_coding | 82,83 | 0,0000000 |
| ENSG00000172244 | C5orf34    | 5  | 43486701  | 43515145  | protein_coding | 82,17 | 0,0000000 |
| ENSG00000186487 | MYT1L      | 2  | 1789113   | 2331260   | protein_coding | 82,00 | 0,0000000 |
| ENSG00000036672 | USP2       | 11 | 119355215 | 119381726 | protein_coding | 81,19 | 0,0000000 |
| ENSG00000186075 | ZBP2       | 17 | 39868164  | 39877896  | protein_coding | 81,10 | 0,0006696 |
| ENSG00000112499 | SLC22A2    | 6  | 160171061 | 160277638 | protein_coding | 80,40 | 0,0000000 |
| ENSG00000160396 | HIPK4      | 19 | 40379271  | 40390187  | protein_coding | 79,84 | 0,0012807 |
| ENSG00000279956 | ENSG000001 | 2  | 48632291  | 48755724  | protein_coding | 78,93 | 0,0000000 |
| ENSG00000189108 | IL1RAPL2   | X  | 104566315 | 105767829 | protein_coding | 78,25 | 0,0012807 |
| ENSG00000140955 | ADAD2      | 16 | 84191138  | 84197168  | protein_coding | 78,13 | 0,0012807 |
| ENSG00000111249 | CUX2       | 12 | 111034024 | 111350554 | protein_coding | 77,90 | 0,0000000 |
| ENSG00000144821 | MYH15      | 3  | 108380369 | 108529322 | protein_coding | 77,78 | 0,0012807 |
| ENSG00000154118 | JPH3       | 16 | 87601835  | 87698156  | protein_coding | 77,63 | 0,0000000 |
| ENSG00000130201 | EXOC3L2    | 19 | 45212621  | 45234211  | protein_coding | 77,14 | 0,0000000 |
| ENSG00000166578 | IQCD       | 12 | 113195441 | 113221094 | protein_coding | 77,13 | 0,0000000 |
| ENSG00000178397 | FAM220A    | 7  | 6329409   | 6348981   | protein_coding | 76,44 | 0,0000000 |

|                 |          |    |           |           |                |       |           |
|-----------------|----------|----|-----------|-----------|----------------|-------|-----------|
| ENSG00000260027 | HOXB7    | 17 | 48607227  | 48633572  | protein_coding | 76,20 | 0,0012807 |
| ENSG00000175063 | UBE2C    | 20 | 45812576  | 45816957  | protein_coding | 75,21 | 0,0000000 |
| ENSG00000181778 | TMEM252  | 9  | 68536580  | 68540867  | protein_coding | 75,13 | 0,0012807 |
| ENSG00000141431 | ASXL3    | 18 | 33578615  | 33751192  | protein_coding | 74,94 | 0,0000000 |
| ENSG00000169402 | RSPH10B2 | 7  | 6754109   | 6799365   | protein_coding | 74,65 | 0,0012807 |
| ENSG00000154975 | CA10     | 17 | 51630313  | 52160017  | protein_coding | 74,60 | 0,0000000 |
| ENSG00000054803 | CBLN4    | 20 | 55997440  | 56005472  | protein_coding | 73,75 | 0,0000000 |
| ENSG00000013810 | TACC3    | 4  | 1721490   | 1745176   | protein_coding | 73,10 | 0,0000000 |
| ENSG00000094963 | FMO2     | 1  | 171185208 | 171211230 | protein_coding | 72,08 | 0,0012807 |
| ENSG00000106128 | GHRHR    | 7  | 30938669  | 30993254  | protein_coding | 69,70 | 0,0006696 |
| ENSG00000123977 | DAW1     | 2  | 227871054 | 227924344 | protein_coding | 69,48 | 0,0000000 |
| ENSG00000102678 | FGF9     | 13 | 21671383  | 21704498  | protein_coding | 69,15 | 0,0012807 |
| ENSG00000130226 | DPP6     | 7  | 153887097 | 154894285 | protein_coding | 69,15 | 0,0000000 |
| ENSG00000079112 | CDH17    | 8  | 94127171  | 94217303  | protein_coding | 68,97 | 0,0000000 |
| ENSG00000178222 | RNF212   | 4  | 1056250   | 1113562   | protein_coding | 68,97 | 0,0000000 |
| ENSG00000074211 | PPP2R2C  | 4  | 6320578   | 6563600   | protein_coding | 68,65 | 0,0012807 |
| ENSG00000188523 | CFAP77   | 9  | 132410043 | 132573317 | protein_coding | 68,38 | 0,0000000 |
| ENSG00000159374 | M1AP     | 2  | 74557883  | 74648338  | protein_coding | 68,23 | 0,0000000 |
| ENSG00000196139 | AKR1C3   | 10 | 5035354   | 5107686   | protein_coding | 68,10 | 0,0000000 |
| ENSG00000092054 | MYH7     | 14 | 23412738  | 23435718  | protein_coding | 68,09 | 0,0012807 |
| ENSG00000179314 | WSCD1    | 17 | 5772234   | 6124427   | protein_coding | 67,80 | 0,0000000 |
| ENSG00000071909 | MYO3B    | 2  | 170178145 | 170655171 | protein_coding | 67,72 | 0,0000000 |
| ENSG00000104147 | OIP5     | 15 | 41309268  | 41332621  | protein_coding | 67,34 | 0,0000000 |
| ENSG00000173432 | SAA1     | 11 | 18266174  | 18269977  | protein_coding | 67,27 | 0,0000000 |
| ENSG00000092853 | CLSPN    | 1  | 35720218  | 35769967  | protein_coding | 67,09 | 0,0012807 |
| ENSG00000175600 | SUGCT    | 7  | 40134977  | 40860763  | protein_coding | 66,91 | 0,0000000 |
| ENSG00000186377 | CYP4X1   | 1  | 47023568  | 47050751  | protein_coding | 66,83 | 0,0000000 |
| ENSG00000187997 | C17orf99 | 17 | 78146353  | 78166177  | protein_coding | 66,70 | 0,0012807 |
| ENSG00000184672 | RALYL    | 8  | 84182787  | 84921844  | protein_coding | 65,75 | 0,0000000 |
| ENSG00000086717 | PPEF1    | X  | 18675909  | 18827921  | protein_coding | 65,16 | 0,0000000 |
| ENSG00000019186 | CYP24A1  | 20 | 54153449  | 54173973  | protein_coding | 64,73 | 0,0000000 |
| ENSG00000176771 | NCKAP5   | 2  | 132671799 | 133568463 | protein_coding | 63,86 | 0,0000000 |
| ENSG00000168070 | C11orf85 | 11 | 64937517  | 64972085  | protein_coding | 63,67 | 0,0000000 |
| ENSG00000126778 | SIX1     | 14 | 60643415  | 60658259  | protein_coding | 63,50 | 0,0025348 |
| ENSG00000229453 | SPINK8   | 3  | 48306842  | 48328341  | protein_coding | 63,20 | 0,0000000 |
| ENSG00000183742 | MACC1    | 7  | 20134655  | 20217404  | protein_coding | 63,18 | 0,0012807 |
| ENSG00000145604 | SKP2     | 5  | 36151989  | 36184319  | protein_coding | 63,10 | 0,0000000 |
| ENSG00000128606 | LRRC17   | 7  | 102912991 | 102944949 | protein_coding | 63,05 | 0,0000000 |
| ENSG00000133937 | GSC      | 14 | 94768216  | 94770230  | protein_coding | 62,58 | 0,0000000 |
| ENSG00000184185 | KCNJ12   | 17 | 21376197  | 21419872  | protein_coding | 62,45 | 0,0184474 |
| ENSG00000135175 | OCM2     | 7  | 97984684  | 97991169  | protein_coding | 62,30 | 0,0006696 |
| ENSG00000145832 | SLC25A48 | 5  | 135834649 | 135888637 | protein_coding | 62,00 | 0,0000000 |
| ENSG00000146453 | PNLDC1   | 6  | 159800249 | 159820704 | protein_coding | 61,25 | 0,0000000 |
| ENSG00000135451 | TROAP    | 12 | 49323236  | 49331731  | protein_coding | 61,22 | 0,0000000 |
| ENSG00000164920 | OSR2     | 8  | 98944403  | 98952104  | protein_coding | 61,06 | 0,0000000 |
| ENSG00000179284 | DAND5    | 19 | 12965159  | 12974762  | protein_coding | 59,64 | 0,0025348 |
| ENSG00000237136 | C4orf51  | 4  | 145680204 | 145771032 | protein_coding | 59,40 | 0,0000000 |
| ENSG00000152804 | HHEX     | 10 | 92689951  | 92695646  | protein_coding | 59,21 | 0,0000000 |
| ENSG00000137261 | KIAA0319 | 6  | 24544104  | 24646155  | protein_coding | 58,78 | 0,0000000 |
| ENSG00000066405 | CLDN18   | 3  | 137998735 | 138033655 | protein_coding | 58,23 | 0,0012807 |
| ENSG00000151090 | THRB     | 3  | 24117160  | 24495282  | protein_coding | 58,15 | 0,0000000 |
| ENSG00000147724 | FAM135B  | 8  | 138130023 | 138496822 | protein_coding | 58,10 | 0,0000000 |
| ENSG00000104722 | NEFM     | 8  | 24913012  | 24919098  | protein_coding | 58,04 | 0,0062591 |
| ENSG00000165490 | DDIAS    | 11 | 82899975  | 82958277  | protein_coding | 57,98 | 0,0000000 |
| ENSG00000131620 | ANO1     | 11 | 70078302  | 70189528  | protein_coding | 57,92 | 0,0000000 |



|                 |           |    |           |           |                |       |           |
|-----------------|-----------|----|-----------|-----------|----------------|-------|-----------|
| ENSG00000281370 | ENSG00000 | 12 | 102075068 | 102075229 | protein_coding | 57,75 | 0,0000000 |
| ENSG00000130816 | DNMT1     | 19 | 10133345  | 10231286  | protein_coding | 57,62 | 0,0000000 |
| ENSG00000263513 | FAM72C    | 1  | 143955364 | 143971965 | protein_coding | 57,43 | 0,0000000 |
| ENSG00000134020 | PEBP4     | 8  | 22713251  | 23000000  | protein_coding | 57,32 | 0,0012807 |
| ENSG00000173976 | RAX2      | 19 | 3769089   | 3772221   | protein_coding | 56,90 | 0,0012807 |
| ENSG00000132446 | FTHL17    | X  | 31071241  | 31072053  | protein_coding | 56,70 | 0,0006696 |
| ENSG00000249961 | CCDC79    | 16 | 66754976  | 66801620  | protein_coding | 56,36 | 0,0012807 |
| ENSG00000144460 | NYAP2     | 2  | 225400648 | 225654018 | protein_coding | 56,32 | 0,0000000 |
| ENSG00000105877 | DNAH11    | 7  | 21543215  | 21901839  | protein_coding | 56,02 | 0,0000000 |
| ENSG00000143032 | BARHL2    | 1  | 90711539  | 90717237  | protein_coding | 56,00 | 0,0012807 |
| ENSG00000143228 | NUF2      | 1  | 163266576 | 163355764 | protein_coding | 55,80 | 0,0012807 |
| ENSG00000164089 | ETNPPL    | 4  | 108742040 | 108763054 | protein_coding | 55,79 | 0,0025348 |
| ENSG00000106484 | MEST      | 7  | 130486171 | 130506296 | protein_coding | 55,63 | 0,0000000 |
| ENSG00000128408 | RIBC2     | 22 | 45413691  | 45432496  | protein_coding | 55,61 | 0,0148097 |
| ENSG00000136542 | GALNT5    | 2  | 157257598 | 157314211 | protein_coding | 55,60 | 0,0000000 |
| ENSG00000164109 | MAD2L1    | 4  | 120055608 | 120067074 | protein_coding | 55,34 | 0,0000000 |
| ENSG00000042781 | USH2A     | 1  | 215622894 | 216423396 | protein_coding | 55,24 | 0,0000000 |
| ENSG00000127780 | OR1E2     | 17 | 3432870   | 3433841   | protein_coding | 55,00 | 0,0000000 |
| ENSG00000168298 | HIST1H1E  | 6  | 26156354  | 26157107  | protein_coding | 54,37 | 0,0609506 |
| ENSG00000152214 | RIT2      | 18 | 42743227  | 43115691  | protein_coding | 54,30 | 0,0000000 |
| ENSG00000165304 | MELK      | 9  | 36572862  | 36677683  | protein_coding | 54,14 | 0,0000000 |
| ENSG00000151812 | SLC35F4   | 14 | 57563922  | 57982194  | protein_coding | 54,00 | 0,0000000 |
| ENSG00000198010 | DLGAP2    | 8  | 1501366   | 1708476   | protein_coding | 54,00 | 0,0012807 |
| ENSG00000094755 | GABRP     | 5  | 170763350 | 170814047 | protein_coding | 54,00 | 0,0006696 |
| ENSG00000156475 | PPP2R2B   | 5  | 146581146 | 147084784 | protein_coding | 53,36 | 0,0012807 |
| ENSG00000095464 | PDE6C     | 10 | 93612588  | 93666010  | protein_coding | 52,60 | 0,0050271 |
| ENSG00000173805 | HAP1      | 17 | 41717742  | 41734644  | protein_coding | 52,23 | 0,0012807 |
| ENSG00000261949 | GFY       | 19 | 49423749  | 49428818  | protein_coding | 52,20 | 0,0006696 |
| ENSG00000171848 | RRM2      | 2  | 10122328  | 10131419  | protein_coding | 52,02 | 0,0000000 |
| ENSG00000007001 | UPP2      | 2  | 157876702 | 158136154 | protein_coding | 51,90 | 0,0000000 |
| ENSG00000156265 | MAP3K7CL  | 21 | 29077471  | 29175889  | protein_coding | 51,69 | 0,0000000 |
| ENSG00000140015 | KCNH5     | 14 | 62699454  | 63102037  | protein_coding | 51,60 | 0,0006696 |
| ENSG00000122674 | CCZ1      | 7  | 5898725   | 5926550   | protein_coding | 51,52 | 0,0000000 |
| ENSG00000171587 | DSCAM     | 21 | 40010999  | 40847139  | protein_coding | 51,50 | 0,0006696 |
| ENSG00000182968 | SOX1      | 13 | 112067647 | 112070488 | protein_coding | 51,50 | 0,0006696 |
| ENSG00000182308 | DCAF4L1   | 4  | 41981696  | 41986467  | protein_coding | 51,44 | 0,0000000 |
| ENSG00000131979 | GCH1      | 14 | 54842008  | 54902852  | protein_coding | 51,28 | 0,0000000 |
| ENSG00000145919 | BOD1      | 5  | 173607514 | 173616660 | protein_coding | 51,07 | 0,0000000 |
| ENSG00000166509 | CLEC3A    | 16 | 78022515  | 78066761  | protein_coding | 51,00 | 0,0025348 |
| ENSG00000151322 | NPAS3     | 14 | 32934933  | 33804176  | protein_coding | 50,89 | 0,0000000 |
| ENSG00000139865 | TTC6      | 14 | 37595847  | 38041442  | protein_coding | 50,70 | 0,0006696 |
| ENSG00000174844 | DNAH12    | 3  | 57293699  | 57544344  | protein_coding | 50,43 | 0,0000000 |
| ENSG00000165105 | RASEF     | 9  | 82979585  | 83063177  | protein_coding | 50,34 | 0,0000000 |
| ENSG00000168928 | CTRB2     | 16 | 75204096  | 75207185  | protein_coding | 49,86 | 0,0000000 |
| ENSG00000229474 | PATL2     | 15 | 44665732  | 44711316  | protein_coding | 49,62 | 0,0012807 |
| ENSG00000168959 | GRM5      | 11 | 88504576  | 89065945  | protein_coding | 49,58 | 0,0012807 |
| ENSG00000166415 | WDR72     | 15 | 53513741  | 53762878  | protein_coding | 49,00 | 0,0000000 |
| ENSG00000090889 | KIF4A     | X  | 70290090  | 70420832  | protein_coding | 48,82 | 0,0000000 |
| ENSG00000172320 | OR5A1     | 11 | 59443144  | 59444194  | protein_coding | 48,80 | 0,0006696 |
| ENSG00000204711 | C9orf135  | 9  | 69820793  | 69906232  | protein_coding | 48,54 | 0,0012807 |
| ENSG00000162782 | TDRD5     | 1  | 179591613 | 179691272 | protein_coding | 48,46 | 0,0012807 |
| ENSG00000143921 | ABCG8     | 2  | 43838964  | 43878466  | protein_coding | 48,33 | 0,0000000 |
| ENSG00000105523 | FAM83E    | 19 | 48600810  | 48614854  | protein_coding | 48,12 | 0,0062591 |
| ENSG00000189056 | RELN      | 7  | 103471784 | 103989516 | protein_coding | 48,09 | 0,0000000 |
| ENSG00000156006 | NAT2      | 8  | 18391245  | 18401218  | protein_coding | 48,00 | 0,0000000 |

|                 |           |    |           |           |                |       |           |
|-----------------|-----------|----|-----------|-----------|----------------|-------|-----------|
| ENSG00000185272 | RBM11     | 21 | 14216130  | 14228372  | protein_coding | 47,98 | 0,0000000 |
| ENSG00000184661 | CDCA2     | 8  | 25458997  | 25507920  | protein_coding | 47,66 | 0,0012807 |
| ENSG00000183317 | EPHA10    | 1  | 37713880  | 37765133  | protein_coding | 47,64 | 0,0000000 |
| ENSG00000155511 | GRIA1     | 5  | 153489615 | 153813869 | protein_coding | 47,50 | 0,0012807 |
| ENSG00000273111 | LYPD4     | 19 | 41837074  | 41844697  | protein_coding | 47,40 | 0,0000000 |
| ENSG00000183560 | IZUMO1R   | 11 | 94305593  | 94307721  | protein_coding | 47,15 | 0,0012807 |
| ENSG00000104213 | PDGFRL    | 8  | 17576433  | 17644071  | protein_coding | 47,14 | 0,0000000 |
| ENSG00000163817 | SLC6A20   | 3  | 45755450  | 45796535  | protein_coding | 46,97 | 0,0006696 |
| ENSG00000206102 | KRTAP19-8 | 21 | 31038159  | 31038476  | protein_coding | 46,90 | 0,0006696 |
| ENSG00000167741 | GGT6      | 17 | 4556927   | 4560818   | protein_coding | 46,80 | 0,0006696 |
| ENSG00000198331 | HYLS1     | 11 | 125883614 | 125900648 | protein_coding | 46,62 | 0,0000000 |
| ENSG00000153233 | PTPRR     | 12 | 70638073  | 70920843  | protein_coding | 46,61 | 0,0000000 |
| ENSG00000006047 | YBX2      | 17 | 7288252   | 7294615   | protein_coding | 46,33 | 0,0000000 |
| ENSG00000124391 | IL17C     | 16 | 88638591  | 88640473  | protein_coding | 46,30 | 0,0012807 |
| ENSG00000164756 | SLC30A8   | 8  | 116950273 | 117176714 | protein_coding | 46,21 | 0,0000000 |
| ENSG00000117399 | CDC20     | 1  | 43358955  | 43363203  | protein_coding | 45,95 | 0,0000000 |
| ENSG00000157111 | TMEM171   | 5  | 73120292  | 73131817  | protein_coding | 45,94 | 0,0000000 |
| ENSG00000171243 | SOSTDC1   | 7  | 16461481  | 16530580  | protein_coding | 45,87 | 0,0000000 |
| ENSG00000205549 | C9orf92   | 9  | 16203935  | 16276313  | protein_coding | 45,20 | 0,0000000 |
| ENSG00000157152 | SYN2      | 3  | 12004402  | 12191400  | protein_coding | 45,08 | 0,0000000 |
| ENSG00000077935 | SMC1B     | 22 | 45344063  | 45413619  | protein_coding | 44,85 | 0,0012807 |
| ENSG00000128040 | SPINK2    | 4  | 56809860  | 56821742  | protein_coding | 44,30 | 0,0012807 |
| ENSG00000165828 | PRAP1     | 10 | 133309410 | 133352683 | protein_coding | 44,18 | 0,0000000 |
| ENSG00000153898 | MCOLN2    | 1  | 84925583  | 84997113  | protein_coding | 44,13 | 0,0000000 |
| ENSG00000181143 | MUC16     | 19 | 8848844   | 8981342   | protein_coding | 44,00 | 0,0012807 |
| ENSG00000181541 | MAB21L2   | 4  | 150581922 | 150584693 | protein_coding | 43,83 | 0,0184474 |
| ENSG00000153162 | BMP6      | 6  | 7726797   | 7881422   | protein_coding | 43,81 | 0,0000000 |
| ENSG00000119125 | GDA       | 9  | 72114595  | 72257193  | protein_coding | 43,46 | 0,0012807 |
| ENSG00000133980 | VRTN      | 14 | 74303069  | 74360008  | protein_coding | 43,30 | 0,0006696 |
| ENSG00000156970 | BUB1B     | 15 | 40161023  | 40221136  | protein_coding | 43,04 | 0,0000000 |
| ENSG00000070501 | POLB      | 8  | 42338454  | 42371808  | protein_coding | 42,83 | 0,0000000 |
| ENSG00000172331 | BPGM      | 7  | 134646808 | 134679813 | protein_coding | 42,75 | 0,0000000 |
| ENSG00000006747 | SCIN      | 7  | 12570577  | 12660179  | protein_coding | 42,65 | 0,0000000 |
| ENSG00000174527 | MYO1H     | 12 | 109347903 | 109455523 | protein_coding | 42,62 | 0,0037996 |
| ENSG00000140563 | MCTP2     | 15 | 94231538  | 94483952  | protein_coding | 42,50 | 0,0000000 |
| ENSG00000155026 | RSPH10B   | 7  | 5925550   | 5970683   | protein_coding | 42,32 | 0,0000000 |
| ENSG00000158813 | EDA       | X  | 69616067  | 70039469  | protein_coding | 42,21 | 0,0000000 |
| ENSG00000138778 | CENPE     | 4  | 103105806 | 103198409 | protein_coding | 42,13 | 0,0000000 |
| ENSG00000109927 | TECTA     | 11 | 121101173 | 121191493 | protein_coding | 42,08 | 0,0000000 |
| ENSG00000123485 | HJURP     | 2  | 233833416 | 233854566 | protein_coding | 42,03 | 0,0000000 |
| ENSG00000165863 | C10orf82  | 10 | 116663696 | 116670264 | protein_coding | 41,76 | 0,0000000 |
| ENSG00000274997 | HIST1H2AH | 6  | 27147129  | 27147515  | protein_coding | 41,71 | 0,0012807 |
| ENSG00000115163 | CENPA     | 2  | 26764289  | 26801067  | protein_coding | 41,55 | 0,0000000 |
| ENSG00000164508 | HIST1H2AA | 6  | 25726132  | 25726527  | protein_coding | 41,40 | 0,0418702 |
| ENSG00000185056 | C5orf47   | 5  | 173973779 | 174006140 | protein_coding | 41,37 | 0,0000000 |
| ENSG00000093009 | CDC45     | 22 | 19479459  | 19520612  | protein_coding | 41,35 | 0,0000000 |
| ENSG00000143333 | RGS16     | 1  | 182598623 | 182604408 | protein_coding | 41,04 | 0,0000000 |
| ENSG00000007944 | MYLIP     | 6  | 16129125  | 16148248  | protein_coding | 40,87 | 0,0000000 |
| ENSG00000121152 | NCAPH     | 2  | 96335787  | 96373845  | protein_coding | 40,43 | 0,0075075 |
| ENSG00000144893 | MED12L    | 3  | 151085697 | 151437072 | protein_coding | 40,40 | 0,0000000 |
| ENSG00000183801 | OLFML1    | 11 | 7485388   | 7511377   | protein_coding | 40,40 | 0,0000000 |
| ENSG00000187021 | PNLIPRP1  | 10 | 116590385 | 116609175 | protein_coding | 40,00 | 0,0006696 |
| ENSG00000215784 | FAM72D    | 1  | 145096000 | 145112696 | protein_coding | 40,00 | 0,0000000 |
| ENSG00000157456 | CCNB2     | 15 | 59105078  | 59125045  | protein_coding | 39,91 | 0,0000000 |
| ENSG00000142789 | CELA3A    | 1  | 22001656  | 22012539  | protein_coding | 39,90 | 0,0418702 |

|                 |           |    |           |           |                |       |           |
|-----------------|-----------|----|-----------|-----------|----------------|-------|-----------|
| ENSG00000154227 | CERS3     | 15 | 100400395 | 100544995 | protein_coding | 39,30 | 0,0006696 |
| ENSG00000277481 | PKD1L3    | 16 | 71929538  | 71999978  | protein_coding | 39,00 | 0,0000000 |
| ENSG00000153157 | SYCP2L    | 6  | 10886831  | 10979320  | protein_coding | 39,00 | 0,0000000 |
| ENSG00000134215 | VAV3      | 1  | 107571160 | 107965144 | protein_coding | 38,64 | 0,0000000 |
| ENSG00000119973 | PRLHR     | 10 | 118589989 | 118595699 | protein_coding | 38,45 | 0,0000000 |
| ENSG00000121211 | MND1      | 4  | 153344649 | 153415118 | protein_coding | 38,35 | 0,0000000 |
| ENSG00000121236 | TRIM6     | 11 | 5596109   | 5612958   | protein_coding | 38,26 | 0,0000000 |
| ENSG00000105011 | ASF1B     | 19 | 14119509  | 14136956  | protein_coding | 38,20 | 0,0000000 |
| ENSG00000149554 | CHEK1     | 11 | 125625136 | 125676255 | protein_coding | 38,17 | 0,0000000 |
| ENSG00000138617 | PARP16    | 15 | 65234460  | 65300618  | protein_coding | 38,00 | 0,0000000 |
| ENSG00000154493 | C10orf90  | 10 | 126424997 | 126670446 | protein_coding | 38,00 | 0,0000000 |
| ENSG00000105173 | CCNE1     | 19 | 29811898  | 29824308  | protein_coding | 37,54 | 0,0000000 |
| ENSG00000158089 | GALNT14   | 2  | 30910467  | 31155202  | protein_coding | 37,27 | 0,0000000 |
| ENSG00000184611 | KCNH7     | 2  | 162371407 | 162838730 | protein_coding | 36,43 | 0,0012807 |
| ENSG00000156876 | SASS6     | 1  | 100083563 | 100132955 | protein_coding | 36,40 | 0,0000000 |
| ENSG00000183559 | C10orf120 | 10 | 122697709 | 122699822 | protein_coding | 36,40 | 0,0000000 |
| ENSG00000169436 | COL22A1   | 8  | 138588235 | 138914006 | protein_coding | 36,27 | 0,0075075 |
| ENSG00000065328 | MCM10     | 10 | 13161554  | 13211104  | protein_coding | 35,94 | 0,0000000 |
| ENSG00000171435 | KSR2      | 12 | 117453012 | 117968983 | protein_coding | 35,80 | 0,0012807 |
| ENSG00000273983 | HIST1H3G  | 6  | 26269405  | 26271815  | protein_coding | 35,63 | 0,0012807 |
| ENSG00000182256 | GABRG3    | 15 | 26971282  | 27541991  | protein_coding | 35,50 | 0,0000000 |
| ENSG00000062038 | CDH3      | 16 | 68636189  | 68722616  | protein_coding | 35,42 | 0,0000000 |
| ENSG00000182334 | OR5P3     | 11 | 7825037   | 7825972   | protein_coding | 35,40 | 0,0012807 |
| ENSG00000131773 | KHDRBS3   | 8  | 135457457 | 135656722 | protein_coding | 35,40 | 0,0000000 |
| ENSG00000021826 | CPS1      | 2  | 210477682 | 210679107 | protein_coding | 35,34 | 0,0000000 |
| ENSG00000006788 | MYH13     | 17 | 10298084  | 10373130  | protein_coding | 35,27 | 0,0012807 |
| ENSG00000203995 | ZYG11A    | 1  | 52842511  | 52894998  | protein_coding | 35,03 | 0,0000000 |
| ENSG00000039139 | DNAH5     | 5  | 13690331  | 13944543  | protein_coding | 34,95 | 0,0012807 |
| ENSG00000204595 | DPRX      | 19 | 53632056  | 53637009  | protein_coding | 34,90 | 0,0000000 |
| ENSG00000175879 | HOXD8     | 2  | 176129694 | 176132695 | protein_coding | 34,86 | 0,0000000 |
| ENSG00000157303 | SUSD3     | 9  | 93058688  | 93085138  | protein_coding | 34,76 | 0,0000000 |
| ENSG00000112706 | IMPG1     | 6  | 75921115  | 76072678  | protein_coding | 34,72 | 0,0000000 |
| ENSG00000138376 | BARD1     | 2  | 214725646 | 214809711 | protein_coding | 34,65 | 0,0000000 |
| ENSG00000179603 | GRM8      | 7  | 126438598 | 127253294 | protein_coding | 34,63 | 0,0000000 |
| ENSG00000165899 | OTOGL     | 12 | 80209453  | 80379090  | protein_coding | 34,50 | 0,0000000 |
| ENSG00000112941 | PAPD7     | 5  | 6713007   | 6757048   | protein_coding | 34,38 | 0,0000000 |
| ENSG00000183273 | CCDC60    | 12 | 119334712 | 119541047 | protein_coding | 34,36 | 0,0000000 |
| ENSG00000171643 | S100Z     | 5  | 76850001  | 76921650  | protein_coding | 34,28 | 0,0012807 |
| ENSG00000085552 | IGSF9     | 1  | 159927039 | 159945604 | protein_coding | 34,25 | 0,0000000 |
| ENSG00000164674 | SYTL3     | 6  | 158650014 | 158764876 | protein_coding | 34,13 | 0,0000000 |
| ENSG00000239642 | MEIKIN    | 5  | 131806993 | 131945698 | protein_coding | 34,00 | 0,0006696 |
| ENSG00000151475 | SLC25A31  | 4  | 127730378 | 127774299 | protein_coding | 33,82 | 0,0000000 |
| ENSG00000166748 | AGBL1     | 15 | 86141996  | 87029052  | protein_coding | 33,80 | 0,0000000 |
| ENSG00000160188 | RSPH1     | 21 | 42472486  | 42496354  | protein_coding | 33,76 | 0,0000000 |
| ENSG00000183840 | GPR39     | 2  | 132416574 | 132646559 | protein_coding | 33,68 | 0,0000000 |
| ENSG00000157542 | KCNJ6     | 21 | 37607376  | 37916446  | protein_coding | 33,67 | 0,0000000 |
| ENSG00000132801 | ZSWIM3    | 20 | 45857617  | 45879122  | protein_coding | 33,66 | 0,0000000 |
| ENSG00000153266 | FEZF2     | 3  | 62369681  | 62374324  | protein_coding | 33,44 | 0,0025348 |
| ENSG00000172073 | TEX37     | 2  | 88524651  | 88529584  | protein_coding | 33,30 | 0,0025348 |
| ENSG00000077279 | DCX       | X  | 111293780 | 111412375 | protein_coding | 33,30 | 0,0025348 |
| ENSG00000184029 | DSCR4     | 21 | 37951425  | 38121360  | protein_coding | 33,20 | 0,0006696 |
| ENSG00000229544 | NKX1-2    | 10 | 124445239 | 124450184 | protein_coding | 33,17 | 0,0000000 |
| ENSG00000139618 | BRCA2     | 13 | 32315474  | 32400266  | protein_coding | 32,97 | 0,0012807 |
| ENSG00000181215 | C4orf50   | 4  | 5897591   | 5989818   | protein_coding | 32,58 | 0,0025348 |
| ENSG00000180785 | OR51E1    | 11 | 4643420   | 4655488   | protein_coding | 32,12 | 0,0012807 |

|                 |         |    |           |           |                |       |           |
|-----------------|---------|----|-----------|-----------|----------------|-------|-----------|
| ENSG00000144550 | CPNE9   | 3  | 9703807   | 9729908   | protein_coding | 32,02 | 0,0000000 |
| ENSG00000165023 | DIRAS2  | 9  | 90609832  | 90643104  | protein_coding | 32,00 | 0,0050271 |
| ENSG00000082516 | GEMIN5  | 5  | 154887416 | 154938209 | protein_coding | 31,86 | 0,0000000 |
| ENSG00000131153 | GINS2   | 16 | 85676198  | 85690073  | protein_coding | 31,85 | 0,0000000 |
| ENSG00000184305 | CCSER1  | 4  | 90127535  | 91601913  | protein_coding | 31,73 | 0,0000000 |
| ENSG00000170289 | CNGB3   | 8  | 86553977  | 86743675  | protein_coding | 31,64 | 0,0335607 |
| ENSG00000249751 | ECSCR   | 5  | 139448556 | 139462743 | protein_coding | 31,64 | 0,0012807 |
| ENSG00000143473 | KCNH1   | 1  | 210678315 | 211134115 | protein_coding | 31,62 | 0,0000000 |
| ENSG00000178999 | AURKB   | 17 | 8204733   | 8210600   | protein_coding | 31,51 | 0,0000000 |
| ENSG00000154027 | AK5     | 1  | 77282051  | 77559969  | protein_coding | 31,48 | 0,0000000 |
| ENSG00000131730 | CKMT2   | 5  | 81233285  | 81266397  | protein_coding | 31,41 | 0,0000000 |
| ENSG00000183378 | OVCH2   | 11 | 7689438   | 7706421   | protein_coding | 31,40 | 0,0006696 |
| ENSG00000170775 | GPR37   | 7  | 124745997 | 124765627 | protein_coding | 31,37 | 0,0000000 |
| ENSG00000088992 | TESC    | 12 | 117038923 | 117099479 | protein_coding | 31,29 | 0,0000000 |
| ENSG00000171320 | ESCO2   | 8  | 27771949  | 27812640  | protein_coding | 30,98 | 0,0000000 |
| ENSG00000176092 | AIM1L   | 1  | 26321859  | 26354130  | protein_coding | 30,82 | 0,0050271 |
| ENSG00000160145 | KALRN   | 3  | 124080023 | 124726325 | protein_coding | 30,56 | 0,0000000 |
| ENSG00000147246 | HTR2C   | X  | 114584078 | 114910061 | protein_coding | 30,55 | 0,0012807 |
| ENSG00000132297 | HHLA1   | 8  | 132061486 | 132111159 | protein_coding | 30,50 | 0,0006696 |
| ENSG00000142025 | DMRTC2  | 19 | 41844743  | 41852333  | protein_coding | 30,40 | 0,0006696 |
| ENSG00000150394 | CDH8    | 16 | 61647242  | 62037035  | protein_coding | 30,34 | 0,0012807 |
| ENSG00000188487 | INSC    | 11 | 15112424  | 15247208  | protein_coding | 30,27 | 0,0000000 |
| ENSG00000134690 | CDCA8   | 1  | 37692418  | 37709719  | protein_coding | 30,16 | 0,0000000 |
| ENSG00000118322 | ATP10B  | 5  | 160563120 | 160852214 | protein_coding | 30,10 | 0,0006696 |
| ENSG00000197430 | OPALIN  | 10 | 96343216  | 96359365  | protein_coding | 30,08 | 0,0012807 |
| ENSG00000158825 | CDA     | 1  | 20588948  | 20618908  | protein_coding | 30,00 | 0,0000000 |
| ENSG00000177570 | SAMD12  | 8  | 118189459 | 118621995 | protein_coding | 29,99 | 0,0000000 |
| ENSG00000129810 | SGOL1   | 3  | 20160593  | 20186292  | protein_coding | 29,94 | 0,0000000 |
| ENSG00000146574 | CCZ1B   | 7  | 6794134   | 6826770   | protein_coding | 29,92 | 0,0000000 |
| ENSG00000176273 | SLC35G1 | 10 | 93893973  | 93956062  | protein_coding | 29,91 | 0,0000000 |
| ENSG00000043355 | ZIC2    | 13 | 99981772  | 99986773  | protein_coding | 29,90 | 0,0000000 |
| ENSG00000186795 | KCNK18  | 10 | 117197489 | 117210299 | protein_coding | 29,70 | 0,0012807 |
| ENSG00000204531 | POU5F1  | 6  | 31164337  | 31180731  | protein_coding | 29,70 | 0,0000000 |
| ENSG00000226650 | KIF4B   | 5  | 155013755 | 155018132 | protein_coding | 29,68 | 0,0012807 |
| ENSG00000277586 | NEFL    | 8  | 24950955  | 24957110  | protein_coding | 29,50 | 0,0012807 |
| ENSG00000155465 | SLC7A7  | 14 | 22773222  | 22829820  | protein_coding | 29,46 | 0,0000000 |
| ENSG00000120675 | DNAJC15 | 13 | 43023203  | 43114224  | protein_coding | 29,43 | 0,0000000 |
| ENSG00000134058 | CDK7    | 5  | 69234795  | 69277430  | protein_coding | 29,35 | 0,0000000 |
| ENSG00000186871 | ERCC6L  | X  | 72204657  | 72239047  | protein_coding | 29,34 | 0,0111464 |
| ENSG00000168546 | GFRA2   | 8  | 21690403  | 21812357  | protein_coding | 29,23 | 0,0000000 |
| ENSG00000274286 | ADRA2B  | 2  | 96112875  | 96116245  | protein_coding | 29,22 | 0,0012807 |
| ENSG00000107672 | NSMCE4A | 10 | 121957088 | 121975217 | protein_coding | 29,19 | 0,0000000 |
| ENSG00000143476 | DTL     | 1  | 212035553 | 212107400 | protein_coding | 28,88 | 0,0000000 |
| ENSG00000119888 | EPCAM   | 2  | 47345158  | 47387601  | protein_coding | 28,82 | 0,0000000 |
| ENSG00000140968 | IRF8    | 16 | 85898803  | 85922609  | protein_coding | 28,75 | 0,0000000 |
| ENSG00000163808 | KIF15   | 3  | 44761717  | 44873376  | protein_coding | 28,63 | 0,0000000 |
| ENSG00000111404 | RERGL   | 12 | 18080869  | 18320107  | protein_coding | 28,60 | 0,0006696 |
| ENSG00000140025 | EFCAB11 | 14 | 89794669  | 89954777  | protein_coding | 28,55 | 0,0000000 |
| ENSG00000187151 | ANGPTL5 | 11 | 101890674 | 101916522 | protein_coding | 28,50 | 0,0000000 |
| ENSG00000168672 | FAM84B  | 8  | 126552442 | 126558393 | protein_coding | 28,39 | 0,0000000 |
| ENSG00000115468 | EFHD1   | 2  | 232606057 | 232682781 | protein_coding | 28,39 | 0,0000000 |
| ENSG00000204740 | MALRD1  | 10 | 19048771  | 19790401  | protein_coding | 28,17 | 0,0000000 |
| ENSG00000151365 | THRSP   | 11 | 78063861  | 78068351  | protein_coding | 28,06 | 0,0012807 |
| ENSG00000174607 | UGT8    | 4  | 114598455 | 114678224 | protein_coding | 28,04 | 0,0000000 |
| ENSG00000176714 | CCDC121 | 2  | 27625639  | 27629012  | protein_coding | 27,99 | 0,0000000 |

|                 |            |    |           |           |                |       |           |
|-----------------|------------|----|-----------|-----------|----------------|-------|-----------|
| ENSG00000163002 | NUP35      | 2  | 183117513 | 183161680 | protein_coding | 27,63 | 0,0000000 |
| ENSG00000198542 | ITGBL1     | 13 | 101452593 | 101720856 | protein_coding | 27,56 | 0,0000000 |
| ENSG00000173258 | ZNF483     | 9  | 111525159 | 111577844 | protein_coding | 27,36 | 0,0184474 |
| ENSG00000168772 | CXXC4      | 4  | 104468312 | 104494901 | protein_coding | 27,36 | 0,0000000 |
| ENSG00000021488 | SLC7A9     | 19 | 32830509  | 32869766  | protein_coding | 27,14 | 0,0000000 |
| ENSG00000160191 | PDE9A      | 21 | 42653636  | 42775509  | protein_coding | 27,12 | 0,0012807 |
| ENSG00000172572 | PDE3A      | 12 | 20369245  | 20684381  | protein_coding | 27,09 | 0,0000000 |
| ENSG00000187416 | LHFPL3     | 7  | 104328656 | 104907232 | protein_coding | 26,69 | 0,0012807 |
| ENSG00000188580 | NKAIN2     | 6  | 123804141 | 124825657 | protein_coding | 26,69 | 0,0012807 |
| ENSG00000172159 | FRMD3      | 9  | 83242990  | 83538546  | protein_coding | 26,57 | 0,0012807 |
| ENSG00000150551 | LYPD1      | 2  | 132644853 | 132671579 | protein_coding | 26,56 | 0,0000000 |
| ENSG00000103534 | TMC5       | 16 | 19410496  | 19499113  | protein_coding | 26,53 | 0,0000000 |
| ENSG00000145703 | IQGAP2     | 5  | 76403249  | 76708132  | protein_coding | 26,47 | 0,0000000 |
| ENSG00000174015 | SPERT      | 13 | 45702311  | 45714559  | protein_coding | 26,40 | 0,0012807 |
| ENSG00000176160 | HSF5       | 17 | 58420167  | 58488384  | protein_coding | 26,37 | 0,0000000 |
| ENSG00000188779 | SKOR1      | 15 | 67819704  | 67834561  | protein_coding | 26,23 | 0,0000000 |
| ENSG00000139973 | SYT16      | 14 | 61995823  | 62112550  | protein_coding | 26,16 | 0,0000000 |
| ENSG00000189057 | FAM111B    | 11 | 59107185  | 59127410  | protein_coding | 26,06 | 0,0111464 |
| ENSG00000138640 | FAM13A     | 4  | 88725955  | 89111398  | protein_coding | 26,05 | 0,0000000 |
| ENSG00000239887 | C1orf226   | 1  | 162366908 | 162386818 | protein_coding | 25,96 | 0,0000000 |
| ENSG00000070182 | SPTB       | 14 | 64746283  | 64879883  | protein_coding | 25,81 | 0,0000000 |
| ENSG00000237693 | IRGM       | 5  | 150846523 | 150900736 | protein_coding | 25,80 | 0,0000000 |
| ENSG00000170633 | RNF34      | 12 | 121400041 | 121430623 | protein_coding | 25,69 | 0,0000000 |
| ENSG00000183629 | GOLGA8G    | 15 | 28519611  | 28533014  | protein_coding | 25,40 | 0,1245284 |
| ENSG00000070159 | PTPN3      | 9  | 109375466 | 109498313 | protein_coding | 25,24 | 0,0000000 |
| ENSG00000107105 | ELAVL2     | 9  | 23690104  | 23826337  | protein_coding | 25,19 | 0,0000000 |
| ENSG00000111247 | RAD51AP1   | 12 | 4538798   | 4560048   | protein_coding | 25,14 | 0,0000000 |
| ENSG00000172602 | RND1       | 12 | 48857145  | 48865898  | protein_coding | 25,13 | 0,0062591 |
| ENSG00000136267 | DGKB       | 7  | 14145049  | 14974777  | protein_coding | 25,09 | 0,0000000 |
| ENSG00000124678 | TCP11      | 6  | 35118071  | 35148610  | protein_coding | 24,71 | 0,0000000 |
| ENSG00000155816 | FMN2       | 1  | 240014348 | 240475189 | protein_coding | 24,71 | 0,0000000 |
| ENSG00000144339 | TMEFF2     | 2  | 191949043 | 192195709 | protein_coding | 24,66 | 0,0000000 |
| ENSG00000142945 | KIF2C      | 1  | 44739818  | 44767767  | protein_coding | 24,65 | 0,0075075 |
| ENSG00000119865 | CNRIP1     | 2  | 68284171  | 68320051  | protein_coding | 24,62 | 0,0000000 |
| ENSG00000275674 | ENSG000002 | 15 | 90266317  | 90314499  | protein_coding | 24,60 | 0,0012807 |
| ENSG00000280188 | ENSG000002 | 14 | 71965306  | 71966899  | protein_coding | 24,60 | 0,0006696 |
| ENSG00000154175 | ABI3BP     | 3  | 100749156 | 100993515 | protein_coding | 24,56 | 0,0000000 |
| ENSG00000112742 | TTK        | 6  | 80003887  | 80042527  | protein_coding | 24,49 | 0,0000000 |
| ENSG00000005421 | PON1       | 7  | 95297676  | 95324707  | protein_coding | 24,45 | 0,0012807 |
| ENSG00000077092 | RARB       | 3  | 25174332  | 25597932  | protein_coding | 24,45 | 0,0000000 |
| ENSG00000214336 | FOXI3      | 2  | 88446787  | 88452656  | protein_coding | 24,33 | 0,0062591 |
| ENSG00000162999 | DUSP19     | 2  | 183078559 | 183100005 | protein_coding | 24,29 | 0,0000000 |
| ENSG00000156575 | PRG3       | 11 | 57376769  | 57381150  | protein_coding | 24,20 | 0,0000000 |
| ENSG00000166450 | PRTG       | 15 | 55611546  | 55743090  | protein_coding | 24,07 | 0,0000000 |
| ENSG00000214511 | HIGD1C     | 12 | 50953922  | 50970506  | protein_coding | 23,90 | 0,0111464 |
| ENSG00000175311 | ANKS4B     | 16 | 21233665  | 21253845  | protein_coding | 23,83 | 0,0012807 |
| ENSG00000155269 | GPR78      | 4  | 8558725   | 8619761   | protein_coding | 23,78 | 0,0025348 |
| ENSG00000103316 | CRYM       | 16 | 21238874  | 21303083  | protein_coding | 23,72 | 0,0000000 |
| ENSG00000182175 | RGMA       | 15 | 93035273  | 93089204  | protein_coding | 23,71 | 0,0012807 |
| ENSG00000136982 | DSCC1      | 8  | 119833976 | 119856010 | protein_coding | 23,27 | 0,0000000 |
| ENSG00000175707 | KDF1       | 1  | 26949562  | 26960406  | protein_coding | 23,20 | 0,0025348 |
| ENSG00000141665 | FBXO15     | 18 | 74073353  | 74147865  | protein_coding | 23,08 | 0,0000000 |
| ENSG00000197826 | C4orf22    | 4  | 80335720  | 80963756  | protein_coding | 23,08 | 0,0000000 |
| ENSG00000163632 | C3orf49    | 3  | 63819362  | 63848636  | protein_coding | 23,04 | 0,4808196 |
| ENSG00000275004 | ZNF280B    | 22 | 22484421  | 22509154  | protein_coding | 22,93 | 0,0000000 |

|                 |           |    |           |           |                |       |           |
|-----------------|-----------|----|-----------|-----------|----------------|-------|-----------|
| ENSG00000165120 | SSMEM1    | 7  | 130207860 | 130216843 | protein_coding | 22,90 | 0,0012807 |
| ENSG00000181965 | NEUROG1   | 5  | 135534282 | 135535949 | protein_coding | 22,80 | 0,0418702 |
| ENSG00000137821 | LRRC49    | 15 | 70853239  | 71053657  | protein_coding | 22,78 | 0,0000000 |
| ENSG00000083454 | P2RX5     | 17 | 3672199   | 3696404   | protein_coding | 22,71 | 0,0025348 |
| ENSG00000105289 | TJP3      | 19 | 3708109   | 3750813   | protein_coding | 22,70 | 0,0006696 |
| ENSG00000126583 | PRKCG     | 19 | 53879190  | 53907652  | protein_coding | 22,68 | 0,0000000 |
| ENSG00000182521 | TBPL2     | 14 | 55413541  | 55456726  | protein_coding | 22,64 | 0,0012807 |
| ENSG00000110427 | KIAA1549L | 11 | 33542072  | 33674102  | protein_coding | 22,62 | 0,0000000 |
| ENSG00000187772 | LIN28B    | 6  | 104957048 | 105083332 | protein_coding | 22,60 | 0,0012807 |
| ENSG00000187581 | COX8C     | 14 | 93347191  | 93348356  | protein_coding | 22,55 | 0,0012807 |
| ENSG00000101938 | CHRD1     | X  | 110673856 | 110795819 | protein_coding | 22,48 | 0,0111464 |
| ENSG00000101951 | PAGE4     | X  | 49829260  | 49833973  | protein_coding | 22,40 | 0,0111464 |
| ENSG00000154438 | ASZ1      | 7  | 117363222 | 117428123 | protein_coding | 22,30 | 0,0006696 |
| ENSG00000117650 | NEK2      | 1  | 211658657 | 211675630 | protein_coding | 22,25 | 0,0075075 |
| ENSG00000160207 | HSF2BP    | 21 | 43529192  | 43659493  | protein_coding | 22,25 | 0,0000000 |
| ENSG00000075188 | NUP37     | 12 | 102073103 | 102120124 | protein_coding | 22,22 | 0,0000000 |
| ENSG00000040275 | SPDL1     | 5  | 169583634 | 169604778 | protein_coding | 22,07 | 0,0000000 |
| ENSG00000234965 | SHISA8    | 22 | 41909554  | 41914667  | protein_coding | 22,00 | 0,0000000 |
| ENSG00000170743 | SYT9      | 11 | 7238778   | 7469042   | protein_coding | 22,00 | 0,0000000 |
| ENSG00000129194 | SOX15     | 17 | 7588178   | 7590170   | protein_coding | 21,99 | 0,0000000 |
| ENSG00000176532 | PRR15     | 7  | 29563811  | 29567295  | protein_coding | 21,90 | 0,0000000 |
| ENSG00000166960 | CCDC178   | 18 | 32937402  | 33441101  | protein_coding | 21,77 | 0,0148097 |
| ENSG00000164142 | FAM160A1  | 4  | 151409216 | 151663632 | protein_coding | 21,72 | 0,0075075 |
| ENSG00000197410 | DCHS2     | 4  | 154232037 | 154491716 | protein_coding | 21,72 | 0,0000000 |
| ENSG00000182348 | ZNF804B   | 7  | 88759368  | 89337057  | protein_coding | 21,70 | 0,0025348 |
| ENSG00000175806 | MSRA      | 8  | 10054268  | 10428891  | protein_coding | 21,67 | 0,0000000 |
| ENSG00000104499 | GML       | 8  | 142834247 | 142916506 | protein_coding | 21,50 | 0,0006696 |
| ENSG00000111875 | ASF1A     | 6  | 118894220 | 118909167 | protein_coding | 21,42 | 0,0000000 |
| ENSG00000174145 | NWD2      | 4  | 37244220  | 37449465  | protein_coding | 21,42 | 0,0012807 |
| ENSG00000108242 | CYP2C18   | 10 | 94683621  | 94736190  | protein_coding | 21,40 | 0,0025348 |
| ENSG00000183347 | GBP6      | 1  | 89364058  | 89386461  | protein_coding | 21,25 | 0,0793786 |
| ENSG00000138308 | PLA2G12B  | 10 | 72935170  | 72954778  | protein_coding | 21,23 | 0,0000000 |
| ENSG00000167670 | CHAF1A    | 19 | 4402662   | 4445018   | protein_coding | 21,22 | 0,0037996 |
| ENSG00000168754 | FAM178B   | 2  | 96875882  | 96986592  | protein_coding | 21,20 | 0,0006696 |
| ENSG00000145850 | TIMD4     | 5  | 156919282 | 156963255 | protein_coding | 21,17 | 0,0000000 |
| ENSG00000180090 | OR3A1     | 17 | 3291635   | 3292600   | protein_coding | 21,10 | 0,0025348 |
| ENSG00000059145 | UNKL      | 16 | 1363205   | 1414751   | protein_coding | 21,04 | 0,0000000 |
| ENSG00000182667 | NTM       | 11 | 131370478 | 132336822 | protein_coding | 21,00 | 0,0006696 |
| ENSG00000118492 | ADGB      | 6  | 146598965 | 146815462 | protein_coding | 21,00 | 0,0006696 |
| ENSG00000178084 | HTR3C     | 3  | 184053047 | 184060671 | protein_coding | 20,82 | 0,0012807 |
| ENSG00000111863 | ADTRP     | 6  | 11712054  | 11807046  | protein_coding | 20,71 | 0,0012807 |
| ENSG00000184258 | CDR1      | X  | 140782405 | 140784871 | protein_coding | 20,70 | 0,0586426 |
| ENSG00000188596 | CFAP54    | 12 | 96489571  | 96875555  | protein_coding | 20,68 | 0,0012807 |
| ENSG00000048540 | LMO3      | 12 | 16548373  | 16610594  | protein_coding | 20,63 | 0,0000000 |
| ENSG00000105549 | THEG      | 19 | 361747    | 376670    | protein_coding | 20,60 | 0,0111464 |
| ENSG00000165125 | TRPV6     | 7  | 142871203 | 142885762 | protein_coding | 20,53 | 0,0105771 |
| ENSG00000134317 | GRHL1     | 2  | 9951693   | 10002277  | protein_coding | 20,52 | 0,0000000 |
| ENSG00000275714 | HIST1H3A  | 6  | 26020490  | 26020900  | protein_coding | 20,26 | 0,0000000 |
| ENSG00000168826 | ZBTB49    | 4  | 4290251   | 4321786   | protein_coding | 20,26 | 0,0025348 |
| ENSG00000138162 | TACC2     | 10 | 121989174 | 122254545 | protein_coding | 20,20 | 0,0000000 |
| ENSG00000105605 | CACNG7    | 19 | 53909335  | 53943941  | protein_coding | 20,17 | 0,0012807 |
| ENSG00000161243 | FBXO27    | 19 | 38990714  | 39032785  | protein_coding | 20,09 | 0,0012807 |
| ENSG00000177602 | GSG2      | 17 | 3723903   | 3726699   | protein_coding | 20,01 | 0,0000000 |
| ENSG00000213231 | TCL1B     | 14 | 95686417  | 95692643  | protein_coding | 20,00 | 0,0000000 |
| ENSG00000170381 | SEMA3E    | 7  | 83363906  | 83649010  | protein_coding | 20,00 | 0,0012807 |

|                 |          |    |           |           |                |       |           |
|-----------------|----------|----|-----------|-----------|----------------|-------|-----------|
| ENSG00000175471 | MCTP1    | 5  | 94703741  | 95284575  | protein_coding | 19,95 | 0,0000000 |
| ENSG00000122547 | EEDP1    | 7  | 36153149  | 36301543  | protein_coding | 19,94 | 0,0000000 |
| ENSG00000152969 | JAKMIP1  | 4  | 6026199   | 6200591   | protein_coding | 19,86 | 0,0000000 |
| ENSG00000148019 | CEP78    | 9  | 78236062  | 78279690  | protein_coding | 19,84 | 0,0000000 |
| ENSG00000164626 | KCNK5    | 6  | 39188973  | 39229450  | protein_coding | 19,83 | 0,0000000 |
| ENSG00000183844 | FAM3B    | 21 | 41304212  | 41357431  | protein_coding | 19,82 | 0,0012807 |
| ENSG00000129038 | LOXL1    | 15 | 73925989  | 73952137  | protein_coding | 19,78 | 0,0000000 |
| ENSG00000166558 | SLC38A8  | 16 | 84009667  | 84042636  | protein_coding | 19,76 | 0,0006696 |
| ENSG00000122735 | DNAI1    | 9  | 34457414  | 34520989  | protein_coding | 19,60 | 0,0012807 |
| ENSG00000150054 | MPP7     | 10 | 28050993  | 28334486  | protein_coding | 19,45 | 0,0000000 |
| ENSG00000091262 | ABCC6    | 16 | 16148928  | 16223522  | protein_coding | 19,40 | 0,0000000 |
| ENSG00000184811 | TUSC5    | 17 | 1279663   | 1300987   | protein_coding | 19,36 | 0,0000000 |
| ENSG00000122584 | NXPH1    | 7  | 8433955   | 8752963   | protein_coding | 19,30 | 0,0025348 |
| ENSG00000184368 | MAP7D2   | X  | 20006713  | 20116917  | protein_coding | 19,28 | 0,0000000 |
| ENSG00000064270 | ATP2C2   | 16 | 84368527  | 84464187  | protein_coding | 19,27 | 0,0000000 |
| ENSG00000212993 | POU5F1B  | 8  | 127414290 | 127420069 | protein_coding | 19,25 | 0,0062591 |
| ENSG00000007174 | DNAH9    | 17 | 11598431  | 11969748  | protein_coding | 19,24 | 0,0000000 |
| ENSG00000164045 | CDC25A   | 3  | 48157146  | 48188402  | protein_coding | 19,21 | 0,0075075 |
| ENSG00000186188 | FFAR4    | 10 | 93566665  | 93604480  | protein_coding | 19,10 | 0,0025348 |
| ENSG00000131126 | TEX101   | 19 | 43401496  | 43418597  | protein_coding | 19,07 | 0,0000000 |
| ENSG00000162594 | IL23R    | 1  | 67166400  | 67259979  | protein_coding | 19,02 | 0,0000000 |
| ENSG00000163116 | STPG2    | 4  | 97184093  | 98143240  | protein_coding | 18,97 | 0,0012807 |
| ENSG00000159625 | DRC7     | 16 | 57694793  | 57731805  | protein_coding | 18,93 | 0,0000000 |
| ENSG00000121210 | KIAA0922 | 4  | 153466346 | 153636711 | protein_coding | 18,92 | 0,0000000 |
| ENSG00000264424 | MYH4     | 17 | 10443290  | 10469559  | protein_coding | 18,90 | 0,0012807 |
| ENSG00000273706 | LHX1     | 17 | 36936785  | 36944612  | protein_coding | 18,90 | 0,0012807 |
| ENSG00000174776 | WDR49    | 3  | 167478684 | 167653983 | protein_coding | 18,90 | 0,0012807 |
| ENSG00000146755 | TRIM50   | 7  | 73312539  | 73328082  | protein_coding | 18,80 | 0,0012807 |
| ENSG00000185737 | NRG3     | 10 | 81875314  | 82987179  | protein_coding | 18,70 | 0,0006696 |
| ENSG00000144820 | ADGRG7   | 3  | 100609589 | 100695479 | protein_coding | 18,70 | 0,0111464 |
| ENSG00000157404 | KIT      | 4  | 54657918  | 54740715  | protein_coding | 18,69 | 0,0000000 |
| ENSG00000176029 | C11orf16 | 11 | 8920076   | 8933006   | protein_coding | 18,68 | 0,0000000 |
| ENSG00000042088 | TDP1     | 14 | 89954939  | 90044768  | protein_coding | 18,61 | 0,0000000 |
| ENSG00000153930 | ANKFN1   | 17 | 56110958  | 56511659  | protein_coding | 18,56 | 0,0012807 |
| ENSG00000152377 | SPOCK1   | 5  | 136975298 | 137598379 | protein_coding | 18,51 | 0,0000000 |
| ENSG00000198901 | PRC1     | 15 | 90966038  | 90995629  | protein_coding | 18,47 | 0,0000000 |
| ENSG00000101144 | BMP7     | 20 | 57168748  | 57266629  | protein_coding | 18,46 | 0,0012807 |
| ENSG00000213185 | FAM24B   | 10 | 122849078 | 122879641 | protein_coding | 18,44 | 0,0012807 |
| ENSG00000130957 | FBP2     | 9  | 94558720  | 94593793  | protein_coding | 18,40 | 0,0025348 |
| ENSG00000175193 | PARL     | 3  | 183829385 | 183884933 | protein_coding | 18,36 | 0,0000000 |
| ENSG00000110675 | ELMOD1   | 11 | 107591091 | 107666779 | protein_coding | 18,34 | 0,0000000 |
| ENSG00000121005 | CRISPLD1 | 8  | 74984515  | 75034558  | protein_coding | 18,34 | 0,0000000 |
| ENSG00000106013 | ANKRD7   | 7  | 118214669 | 118496171 | protein_coding | 18,33 | 0,0075075 |
| ENSG00000158055 | GRHL3    | 1  | 24319322  | 24364482  | protein_coding | 18,31 | 0,0000000 |
| ENSG00000155890 | TRIM42   | 3  | 140678039 | 140701150 | protein_coding | 18,26 | 0,0012807 |
| ENSG00000155886 | SLC24A2  | 9  | 19507452  | 19786928  | protein_coding | 18,19 | 0,0012807 |
| ENSG00000035499 | DEPDC1B  | 5  | 60596912  | 60700190  | protein_coding | 18,12 | 0,0000000 |
| ENSG00000006377 | DLX6     | 7  | 97005548  | 97011039  | protein_coding | 18,07 | 0,0025348 |
| ENSG00000159055 | MIS18A   | 21 | 32268219  | 32279069  | protein_coding | 17,98 | 0,0000000 |
| ENSG00000168079 | SCARA5   | 8  | 27869882  | 27992727  | protein_coding | 17,97 | 0,0000000 |
| ENSG00000145365 | TIFA     | 4  | 112274542 | 112285903 | protein_coding | 17,88 | 0,0000000 |
| ENSG00000179520 | SLC17A8  | 12 | 100357079 | 100422059 | protein_coding | 17,83 | 0,0012807 |
| ENSG00000146410 | MTRF2    | 6  | 136231024 | 136250335 | protein_coding | 17,81 | 0,0037996 |
| ENSG00000161609 | CCDC155  | 19 | 49388218  | 49417994  | protein_coding | 17,80 | 0,0012807 |
| ENSG00000101850 | GPR143   | X  | 9725346   | 9786297   | protein_coding | 17,66 | 0,0000000 |

|                 |          |    |           |           |                |       |           |
|-----------------|----------|----|-----------|-----------|----------------|-------|-----------|
| ENSG00000144362 | PHOSPHO2 | 2  | 169694454 | 169701708 | protein_coding | 17,64 | 0,0012807 |
| ENSG00000168952 | STXBP6   | 14 | 24809656  | 25050297  | protein_coding | 17,56 | 0,0000000 |
| ENSG00000175262 | C1orf127 | 1  | 10946471  | 10982037  | protein_coding | 17,55 | 0,0012807 |
| ENSG00000169306 | IL1RAPL1 | X  | 28587399  | 29956723  | protein_coding | 17,51 | 0,0000000 |
| ENSG00000145386 | CCNA2    | 4  | 121816444 | 121823933 | protein_coding | 17,51 | 0,0000000 |
| ENSG00000091128 | LAMB4    | 7  | 108023548 | 108130356 | protein_coding | 17,47 | 0,0000000 |
| ENSG00000165084 | C8orf34  | 8  | 68330722  | 68819022  | protein_coding | 17,45 | 0,0000000 |
| ENSG00000183032 | SLC25A21 | 14 | 36677921  | 37172866  | protein_coding | 17,40 | 0,0006696 |
| ENSG00000075218 | GTSE1    | 22 | 46296741  | 46330810  | protein_coding | 17,33 | 0,0012807 |
| ENSG00000086570 | FAT2     | 5  | 151504093 | 151568944 | protein_coding | 17,32 | 0,0000000 |
| ENSG00000145839 | IL9      | 5  | 135892246 | 135895827 | protein_coding | 17,30 | 0,0025348 |
| ENSG00000177275 | OR2AJ1   | 1  | 247933769 | 247934755 | protein_coding | 17,30 | 0,0418702 |
| ENSG00000095981 | KCNK16   | 6  | 39314698  | 39322968  | protein_coding | 17,20 | 0,0012807 |
| ENSG00000198929 | NOS1AP   | 1  | 162069774 | 162370475 | protein_coding | 17,18 | 0,0148097 |
| ENSG00000134873 | CLDN10   | 13 | 95433604  | 95579759  | protein_coding | 16,86 | 0,0000000 |
| ENSG00000198028 | ZNF560   | 19 | 9466507   | 9498607   | protein_coding | 16,86 | 0,0000000 |
| ENSG00000186314 | PRELID2  | 5  | 145471799 | 145835369 | protein_coding | 16,84 | 0,0000000 |
| ENSG00000164440 | TXLNB    | 6  | 139240061 | 139292139 | protein_coding | 16,82 | 0,0000000 |
| ENSG00000149488 | TMC2     | 20 | 2536607   | 2641784   | protein_coding | 16,80 | 0,0000000 |
| ENSG00000166426 | CRABP1   | 15 | 78340324  | 78348230  | protein_coding | 16,76 | 0,0000000 |
| ENSG00000153779 | TGIF2LX  | X  | 89921882  | 89922883  | protein_coding | 16,70 | 0,0012807 |
| ENSG00000123219 | CENPK    | 5  | 65517766  | 65563171  | protein_coding | 16,55 | 0,0000000 |
| ENSG00000248905 | FMN1     | 15 | 32765545  | 33194733  | protein_coding | 16,54 | 0,0000000 |
| ENSG00000173175 | ADCY5    | 3  | 123282296 | 123449758 | protein_coding | 16,54 | 0,0012807 |
| ENSG00000261652 | C15orf65 | 15 | 55408548  | 55418764  | protein_coding | 16,52 | 0,0300092 |
| ENSG00000180044 | C3orf80  | 3  | 160225636 | 160228213 | protein_coding | 16,50 | 0,0012807 |
| ENSG00000091651 | ORC6     | 16 | 46689643  | 46698394  | protein_coding | 16,38 | 0,0000000 |
| ENSG00000134343 | ANO3     | 11 | 26309599  | 26663288  | protein_coding | 16,34 | 0,0300092 |
| ENSG00000197721 | CR1L     | 1  | 207645113 | 207738416 | protein_coding | 16,30 | 0,0025348 |
| ENSG00000129173 | E2F8     | 11 | 19224063  | 19241620  | protein_coding | 16,28 | 0,0000000 |
| ENSG00000066279 | ASPM     | 1  | 197084128 | 197146694 | protein_coding | 16,20 | 0,0000000 |
| ENSG00000163535 | SGOL2    | 2  | 200510008 | 200583782 | protein_coding | 16,12 | 0,0000000 |
| ENSG00000189320 | FAM180A  | 7  | 135728348 | 135748846 | protein_coding | 16,09 | 0,0793786 |
| ENSG00000101958 | GLRA2    | X  | 14529298  | 14731812  | protein_coding | 16,05 | 0,0012807 |
| ENSG00000105357 | MYH14    | 19 | 50188186  | 50310545  | protein_coding | 16,00 | 0,0184474 |
| ENSG00000142920 | AZIN2    | 1  | 33081104  | 33120530  | protein_coding | 15,92 | 0,0000000 |
| ENSG00000197849 | OR8G1    | 11 | 124249676 | 124250611 | protein_coding | 15,90 | 0,0012807 |
| ENSG00000177186 | OR2M7    | 1  | 248323630 | 248324568 | protein_coding | 15,90 | 0,0006696 |
| ENSG00000169247 | SH3TC2   | 5  | 148923639 | 149063163 | protein_coding | 15,88 | 0,0000000 |
| ENSG00000125878 | TCF15    | 20 | 603797    | 610398    | protein_coding | 15,81 | 0,0000000 |
| ENSG00000110195 | FOLR1    | 11 | 72189558  | 72196301  | protein_coding | 15,80 | 0,0025348 |
| ENSG00000134533 | RERG     | 12 | 15107783  | 15348675  | protein_coding | 15,76 | 0,0012807 |
| ENSG00000170044 | ZPLD1    | 3  | 102099244 | 102479841 | protein_coding | 15,73 | 0,0012807 |
| ENSG00000105852 | PON3     | 7  | 95359944  | 95396368  | protein_coding | 15,67 | 0,0000000 |
| ENSG00000135476 | ESPL1    | 12 | 53268299  | 53293643  | protein_coding | 15,60 | 0,0000000 |
| ENSG00000187527 | ATP13A5  | 3  | 193274790 | 193378843 | protein_coding | 15,55 | 0,0050271 |
| ENSG00000180116 | C12orf40 | 12 | 39626167  | 39908300  | protein_coding | 15,53 | 0,0012807 |
| ENSG00000167014 | C15orf43 | 15 | 44956702  | 44979229  | protein_coding | 15,50 | 0,0006696 |
| ENSG00000175183 | CSRP2    | 12 | 76858715  | 76879060  | protein_coding | 15,45 | 0,0000000 |
| ENSG00000104814 | MAP4K1   | 19 | 38587641  | 38618882  | protein_coding | 15,35 | 0,0012807 |
| ENSG00000175305 | CCNE2    | 8  | 94879770  | 94896678  | protein_coding | 15,34 | 0,0025348 |
| ENSG00000159259 | CHAF1B   | 21 | 36385378  | 36419015  | protein_coding | 15,28 | 0,0000000 |
| ENSG00000165730 | STOX1    | 10 | 68827541  | 68895432  | protein_coding | 15,25 | 0,0012807 |
| ENSG00000203972 | GLYATL3  | 6  | 49499958  | 49527047  | protein_coding | 15,20 | 0,0000000 |
| ENSG00000228198 | OR2M3    | 1  | 248203068 | 248204006 | protein_coding | 15,20 | 0,0012807 |



|                 |            |    |           |           |                |       |           |
|-----------------|------------|----|-----------|-----------|----------------|-------|-----------|
| ENSG00000119938 | PPP1R3C    | 10 | 91628442  | 91633054  | protein_coding | 15,11 | 0,0000000 |
| ENSG00000180347 | CCDC129    | 7  | 31514071  | 31658720  | protein_coding | 15,10 | 0,0006696 |
| ENSG00000149527 | PLCH2      | 1  | 2425980   | 2505530   | protein_coding | 15,07 | 0,0000000 |
| ENSG00000145491 | ROPN1L     | 5  | 10441524  | 10472029  | protein_coding | 15,07 | 0,0111464 |
| ENSG00000237515 | SHISA9     | 16 | 12901620  | 13240413  | protein_coding | 15,00 | 0,0012807 |
| ENSG00000185038 | MROH2A     | 2  | 233775679 | 233833423 | protein_coding | 15,00 | 0,0111464 |
| ENSG00000165124 | SVEP1      | 9  | 110365251 | 110579880 | protein_coding | 14,98 | 0,0000000 |
| ENSG00000120685 | PROSER1    | 13 | 39009866  | 39038076  | protein_coding | 14,93 | 0,0000000 |
| ENSG00000183654 | 11-mars    | 5  | 16067139  | 16180762  | protein_coding | 14,91 | 0,0012807 |
| ENSG00000074317 | SNCB       | 5  | 176620084 | 176630556 | protein_coding | 14,91 | 0,0000000 |
| ENSG00000015133 | CCDC88C    | 14 | 91271323  | 91417844  | protein_coding | 14,82 | 0,0000000 |
| ENSG00000112984 | KIF20A     | 5  | 138178719 | 138187715 | protein_coding | 14,64 | 0,0000000 |
| ENSG00000157087 | ATP2B2     | 3  | 10324023  | 10708031  | protein_coding | 14,63 | 0,0012807 |
| ENSG00000066923 | STAG3      | 7  | 100177563 | 100221488 | protein_coding | 14,45 | 0,0000000 |
| ENSG00000105219 | CNTD2      | 19 | 40222208  | 40226690  | protein_coding | 14,43 | 0,0000000 |
| ENSG00000163281 | GNPDA2     | 4  | 44682200  | 44726595  | protein_coding | 14,43 | 0,0006696 |
| ENSG00000156469 | MTERF3     | 8  | 96239398  | 96261610  | protein_coding | 14,37 | 0,0000000 |
| ENSG00000164086 | DUSP7      | 3  | 52048919  | 52056550  | protein_coding | 14,36 | 0,0000000 |
| ENSG00000111783 | RFX4       | 12 | 106582907 | 106762803 | protein_coding | 14,36 | 0,0062591 |
| ENSG00000022556 | NLRP2      | 19 | 54953130  | 55001142  | protein_coding | 14,35 | 0,0000000 |
| ENSG00000152580 | IGSF10     | 3  | 151425384 | 151458709 | protein_coding | 14,32 | 0,0000000 |
| ENSG00000167346 | MMP26      | 11 | 4704927   | 4992429   | protein_coding | 14,30 | 0,0111464 |
| ENSG00000138669 | PRKG2      | 4  | 81087370  | 81215117  | protein_coding | 14,29 | 0,0025348 |
| ENSG00000132825 | PPP1R3D    | 20 | 59936668  | 59940297  | protein_coding | 14,25 | 0,0000000 |
| ENSG00000169064 | ZBBX       | 3  | 167240287 | 167381346 | protein_coding | 14,19 | 0,0062591 |
| ENSG00000112214 | FHL5       | 6  | 96562548  | 96616636  | protein_coding | 14,14 | 0,0012807 |
| ENSG00000164123 | C4orf45    | 4  | 158893134 | 159038760 | protein_coding | 14,12 | 0,0012807 |
| ENSG00000184347 | SLIT3      | 5  | 168661733 | 169301129 | protein_coding | 14,12 | 0,0012807 |
| ENSG00000214107 | MAGEB1     | X  | 30243730  | 30252038  | protein_coding | 14,10 | 0,0025348 |
| ENSG00000135362 | PRR5L      | 11 | 36296288  | 36465204  | protein_coding | 14,05 | 0,0000000 |
| ENSG00000182010 | RTKN2      | 10 | 62183035  | 62268707  | protein_coding | 14,01 | 0,0000000 |
| ENSG00000152910 | CNTNAP4    | 16 | 76277278  | 76559238  | protein_coding | 13,94 | 0,0000000 |
| ENSG00000104381 | GDAP1      | 8  | 74321130  | 74488872  | protein_coding | 13,80 | 0,0000000 |
| ENSG00000075043 | KCNQ2      | 20 | 63400210  | 63472677  | protein_coding | 13,80 | 0,0025348 |
| ENSG00000011426 | ANLN       | 7  | 36389806  | 36453791  | protein_coding | 13,69 | 0,0000000 |
| ENSG00000133958 | UNC79      | 14 | 93333219  | 93707876  | protein_coding | 13,62 | 0,0000000 |
| ENSG00000142512 | SIGLEC10   | 19 | 51410021  | 51417803  | protein_coding | 13,61 | 0,0000000 |
| ENSG00000187323 | DCC        | 18 | 52340172  | 53535903  | protein_coding | 13,58 | 0,0012807 |
| ENSG00000142973 | CYP4B1     | 1  | 46757838  | 46819413  | protein_coding | 13,55 | 0,0050271 |
| ENSG00000132386 | SERPINF1   | 17 | 1761959   | 1777574   | protein_coding | 13,53 | 0,0000000 |
| ENSG00000086506 | HBQ1       | 16 | 180453    | 181181    | protein_coding | 13,53 | 0,0148097 |
| ENSG00000139351 | SYCP3      | 12 | 101728648 | 101739472 | protein_coding | 13,51 | 0,0000000 |
| ENSG00000033122 | LRRC7      | 1  | 69568398  | 70151945  | protein_coding | 13,45 | 0,0000000 |
| ENSG00000280148 | ENSG000000 | 6  | 143857318 | 143938471 | protein_coding | 13,40 | 0,0111464 |
| ENSG00000173890 | GPR160     | 3  | 170037929 | 170085403 | protein_coding | 13,34 | 0,0012807 |
| ENSG00000153347 | FAM81B     | 5  | 95391344  | 95450454  | protein_coding | 13,25 | 0,0037996 |
| ENSG00000214050 | FBXO16     | 8  | 28348287  | 28490318  | protein_coding | 13,21 | 0,0000000 |
| ENSG00000101695 | RNF125     | 18 | 32018372  | 32073213  | protein_coding | 13,19 | 0,0006696 |
| ENSG00000172239 | PAIP1      | 5  | 43526267  | 43557758  | protein_coding | 13,19 | 0,0000000 |
| ENSG00000054282 | SDCCAG8    | 1  | 243256034 | 243500092 | protein_coding | 13,19 | 0,0000000 |
| ENSG00000205358 | MT1H       | 16 | 56669814  | 56671129  | protein_coding | 13,16 | 0,0062591 |
| ENSG00000163449 | TMEM169    | 2  | 216081866 | 216102783 | protein_coding | 13,16 | 0,0012807 |
| ENSG00000136943 | CTSV       | 9  | 97029679  | 97039643  | protein_coding | 13,11 | 0,0000000 |
| ENSG00000182698 | RESP18     | 2  | 219327409 | 219333177 | protein_coding | 13,10 | 0,0418702 |
| ENSG00000183831 | ANKRD45    | 1  | 173609561 | 173669862 | protein_coding | 13,02 | 0,0012807 |

|                 |            |    |           |           |                |       |           |
|-----------------|------------|----|-----------|-----------|----------------|-------|-----------|
| ENSG00000176225 | RTTN       | 18 | 70003793  | 70205945  | protein_coding | 13,02 | 0,0000000 |
| ENSG00000109674 | NEIL3      | 4  | 177309836 | 177362943 | protein_coding | 13,01 | 0,0000000 |
| ENSG00000115194 | SLC30A3    | 2  | 27253684  | 27275817  | protein_coding | 12,99 | 0,0012807 |
| ENSG00000135127 | CCDC64     | 12 | 119989869 | 120094494 | protein_coding | 12,94 | 0,0000000 |
| ENSG00000174016 | FAM46D     | X  | 80335504  | 80445311  | protein_coding | 12,93 | 0,0012807 |
| ENSG00000135218 | CD36       | 7  | 80369575  | 80679277  | protein_coding | 12,90 | 0,0000000 |
| ENSG00000187672 | ERC2       | 3  | 55508308  | 56468363  | protein_coding | 12,88 | 0,0000000 |
| ENSG00000164451 | FAM26D     | 6  | 116529013 | 116558868 | protein_coding | 12,86 | 0,1775672 |
| ENSG00000154479 | CCDC173    | 2  | 169645425 | 169694433 | protein_coding | 12,81 | 0,0062591 |
| ENSG00000064692 | SNCAIP     | 5  | 122311354 | 122464219 | protein_coding | 12,79 | 0,0025348 |
| ENSG00000113231 | PDE8B      | 5  | 77210449  | 77429807  | protein_coding | 12,73 | 0,0012807 |
| ENSG00000175866 | BAIAP2     | 17 | 81035122  | 81117432  | protein_coding | 12,72 | 0,0000000 |
| ENSG00000263715 | ENSG000000 | 17 | 45620344  | 45835826  | protein_coding | 12,70 | 0,0012807 |
| ENSG00000189350 | FAM179A    | 2  | 28956611  | 29061373  | protein_coding | 12,70 | 0,0000000 |
| ENSG00000150361 | KLHL1      | 13 | 69700594  | 70108493  | protein_coding | 12,67 | 0,0012807 |
| ENSG00000164379 | FOXQ1      | 6  | 1312473   | 1314187   | protein_coding | 12,64 | 0,0012807 |
| ENSG00000181690 | PLAG1      | 8  | 56160904  | 56211324  | protein_coding | 12,62 | 0,0000000 |
| ENSG00000166569 | CPLX4      | 18 | 59275156  | 59318649  | protein_coding | 12,58 | 0,0335607 |
| ENSG00000080644 | CHRNA3     | 15 | 78593052  | 78621295  | protein_coding | 12,43 | 0,0000000 |
| ENSG00000109832 | DDX25      | 11 | 125903376 | 125928829 | protein_coding | 12,41 | 0,0012807 |
| ENSG00000106018 | VIPR2      | 7  | 159028175 | 159144957 | protein_coding | 12,38 | 0,0335607 |
| ENSG00000174514 | MFSD4      | 1  | 205568885 | 205602918 | protein_coding | 12,38 | 0,0006696 |
| ENSG00000124140 | SLC12A5    | 20 | 46021690  | 46060152  | protein_coding | 12,35 | 0,0000000 |
| ENSG00000187950 | OVCH1      | 12 | 29412474  | 29497686  | protein_coding | 12,28 | 0,0075075 |
| ENSG00000155719 | OTOA       | 16 | 21678514  | 21760729  | protein_coding | 12,27 | 0,0000000 |
| ENSG00000185352 | HS6ST3     | 13 | 96090839  | 96839562  | protein_coding | 12,27 | 0,0012807 |
| ENSG00000178795 | GDPD4      | 11 | 77216558  | 77301687  | protein_coding | 12,25 | 0,0050271 |
| ENSG00000165553 | NGB        | 14 | 77265483  | 77271312  | protein_coding | 12,23 | 0,0062591 |
| ENSG00000157851 | DPYSL5     | 2  | 26847747  | 26950351  | protein_coding | 12,23 | 0,0335607 |
| ENSG00000134864 | GGACT      | 13 | 100530164 | 100589528 | protein_coding | 12,21 | 0,0000000 |
| ENSG00000138075 | ABCG5      | 2  | 43812472  | 43838865  | protein_coding | 12,21 | 0,0012807 |
| ENSG00000126337 | KRT36      | 17 | 41486136  | 41492546  | protein_coding | 12,20 | 0,0012807 |
| ENSG00000112038 | OPRM1      | 6  | 154010496 | 154246867 | protein_coding | 12,20 | 0,0111464 |
| ENSG00000168903 | BTNL3      | 5  | 180988845 | 181006727 | protein_coding | 12,20 | 0,1245284 |
| ENSG00000111665 | CDCA3      | 12 | 6844793   | 6852066   | protein_coding | 12,13 | 0,0000000 |
| ENSG00000029993 | HMGB3      | X  | 150980509 | 150990775 | protein_coding | 12,12 | 0,0000000 |
| ENSG00000004948 | CALCR      | 7  | 93424487  | 93574730  | protein_coding | 12,10 | 0,6142622 |
| ENSG00000203760 | CENPW      | 6  | 126340174 | 126348875 | protein_coding | 12,08 | 0,0000000 |
| ENSG00000185532 | PRKG1      | 10 | 50991358  | 52298350  | protein_coding | 12,06 | 0,0000000 |
| ENSG00000169635 | HIC2       | 22 | 21417404  | 21451463  | protein_coding | 12,03 | 0,0025348 |
| ENSG00000166387 | PPFIBP2    | 11 | 7513298   | 7657127   | protein_coding | 12,01 | 0,0012807 |
| ENSG00000178184 | PARD6G     | 18 | 80157232  | 80247546  | protein_coding | 12,01 | 0,0000000 |
| ENSG00000150656 | CNDP1      | 18 | 74534440  | 74587212  | protein_coding | 12,00 | 0,0025348 |
| ENSG00000136155 | SCEL       | 13 | 77535674  | 77645263  | protein_coding | 12,00 | 0,0012807 |
| ENSG00000037241 | RPL26L1    | 5  | 172958729 | 172969771 | protein_coding | 11,95 | 0,0000000 |
| ENSG00000136250 | AOAH       | 7  | 36512949  | 36724549  | protein_coding | 11,94 | 0,0000000 |
| ENSG00000215475 | SIAH3      | 13 | 45777243  | 45851736  | protein_coding | 11,93 | 0,0111464 |
| ENSG00000151962 | RBM46      | 4  | 154781213 | 154828813 | protein_coding | 11,91 | 0,0000000 |
| ENSG00000129422 | MTUS1      | 8  | 17643795  | 17800917  | protein_coding | 11,89 | 0,0000000 |
| ENSG00000241484 | ARHGAP8    | 22 | 44752558  | 44862788  | protein_coding | 11,87 | 0,0012807 |
| ENSG00000162849 | KIF26B     | 1  | 245154985 | 245709431 | protein_coding | 11,84 | 0,0000000 |
| ENSG00000248746 | ACTN3      | 11 | 66546395  | 66563329  | protein_coding | 11,82 | 0,6003007 |
| ENSG00000173894 | CBX2       | 17 | 79778132  | 79787983  | protein_coding | 11,80 | 0,0000000 |
| ENSG00000145321 | GC         | 4  | 71741693  | 71804041  | protein_coding | 11,80 | 0,0012807 |
| ENSG00000100749 | VRK1       | 14 | 96797304  | 96931722  | protein_coding | 11,74 | 0,0000000 |

|                 |           |    |           |           |                |       |           |
|-----------------|-----------|----|-----------|-----------|----------------|-------|-----------|
| ENSG00000196511 | TPK1      | 7  | 144451941 | 144836395 | protein_coding | 11,72 | 0,0000000 |
| ENSG00000164627 | KIF6      | 6  | 39329990  | 39725405  | protein_coding | 11,71 | 0,0012807 |
| ENSG00000067715 | SYT1      | 12 | 78863993  | 79452008  | protein_coding | 11,69 | 0,0062591 |
| ENSG00000115289 | PCGF1     | 2  | 74505043  | 74508580  | protein_coding | 11,67 | 0,0000000 |
| ENSG00000155275 | TRMT44    | 4  | 8436140   | 8493531   | protein_coding | 11,66 | 0,0000000 |
| ENSG00000079101 | CLUL1     | 18 | 596988    | 650334    | protein_coding | 11,52 | 0,0012807 |
| ENSG00000157212 | PAXIP1    | 7  | 154943687 | 155003084 | protein_coding | 11,50 | 0,0000000 |
| ENSG00000108423 | TUBD1     | 17 | 59859482  | 59892945  | protein_coding | 11,43 | 0,0000000 |
| ENSG00000166971 | AKTIP     | 16 | 53491040  | 53504411  | protein_coding | 11,43 | 0,0000000 |
| ENSG00000135697 | BCO1      | 16 | 81238448  | 81291142  | protein_coding | 11,43 | 0,0012807 |
| ENSG00000205089 | CCNI2     | 5  | 132747445 | 132754403 | protein_coding | 11,41 | 0,0012807 |
| ENSG00000104369 | JPH1      | 8  | 74234700  | 74321328  | protein_coding | 11,39 | 0,0012807 |
| ENSG00000139187 | KLRG1     | 12 | 8950044   | 9010760   | protein_coding | 11,38 | 0,0012807 |
| ENSG00000158246 | FAM46B    | 1  | 27005020  | 27012836  | protein_coding | 11,35 | 0,0050271 |
| ENSG00000108852 | MPP2      | 17 | 43875357  | 43909711  | protein_coding | 11,32 | 0,0050271 |
| ENSG00000180287 | PLD5      | 1  | 242082986 | 242524696 | protein_coding | 11,29 | 0,0012807 |
| ENSG00000157423 | HYDIN     | 16 | 70807378  | 71230722  | protein_coding | 11,28 | 0,0012807 |
| ENSG00000138079 | SLC3A1    | 2  | 44275458  | 44321494  | protein_coding | 11,27 | 0,0000000 |
| ENSG00000051341 | POLQ      | 3  | 121431427 | 121546641 | protein_coding | 11,26 | 0,0000000 |
| ENSG00000134874 | DZIP1     | 13 | 95578202  | 95644703  | protein_coding | 11,23 | 0,0000000 |
| ENSG00000198846 | TOX       | 8  | 58805418  | 59119208  | protein_coding | 11,20 | 0,0000000 |
| ENSG00000188610 | FAM72B    | 1  | 121167646 | 121185539 | protein_coding | 11,18 | 0,0000000 |
| ENSG00000151575 | TEX9      | 15 | 56244009  | 56445997  | protein_coding | 11,16 | 0,0000000 |
| ENSG00000151136 | BTBD11    | 12 | 107318413 | 107659642 | protein_coding | 11,15 | 0,0000000 |
| ENSG00000157388 | CACNA1D   | 3  | 53494656  | 53813733  | protein_coding | 11,12 | 0,0000000 |
| ENSG00000089116 | LHX5      | 12 | 113462034 | 113472280 | protein_coding | 11,10 | 0,0418702 |
| ENSG00000165078 | CPA6      | 8  | 67422125  | 67746345  | protein_coding | 11,10 | 0,0012807 |
| ENSG00000172752 | COL6A5    | 3  | 130345516 | 130484844 | protein_coding | 11,10 | 0,0012807 |
| ENSG00000183631 | PRR32     | X  | 126819764 | 126821786 | protein_coding | 11,10 | 0,0025348 |
| ENSG00000137947 | GTF2B     | 1  | 88852932  | 88891944  | protein_coding | 11,07 | 0,0000000 |
| ENSG00000133302 | SLF1      | 5  | 94618347  | 94739436  | protein_coding | 11,07 | 0,0000000 |
| ENSG00000121101 | TEX14     | 17 | 58556678  | 58692055  | protein_coding | 11,06 | 0,0000000 |
| ENSG00000135063 | FAM189A2  | 9  | 69324572  | 69392455  | protein_coding | 11,03 | 0,0000000 |
| ENSG00000197653 | DNAH10    | 12 | 123762188 | 123936206 | protein_coding | 11,03 | 0,0000000 |
| ENSG00000205212 | CCDC144NL | 17 | 20836447  | 20896140  | protein_coding | 11,00 | 0,0025348 |
| ENSG00000164815 | ORC5      | 7  | 104126341 | 104208047 | protein_coding | 10,99 | 0,0000000 |
| ENSG00000182329 | KIAA2012  | 2  | 202073255 | 202197862 | protein_coding | 10,98 | 0,0105771 |
| ENSG00000144278 | GALNT13   | 2  | 153871913 | 154453849 | protein_coding | 10,97 | 0,0025348 |
| ENSG00000141052 | MYOCD     | 17 | 12665890  | 12768949  | protein_coding | 10,96 | 0,0012807 |
| ENSG00000127337 | YEATS4    | 12 | 69359703  | 69390796  | protein_coding | 10,93 | 0,0012807 |
| ENSG00000153044 | CENPH     | 5  | 69189548  | 69210357  | protein_coding | 10,92 | 0,0012807 |
| ENSG00000205409 | OR52E6    | 11 | 5840928   | 5841952   | protein_coding | 10,90 | 0,0111464 |
| ENSG00000100628 | ASB2      | 14 | 93934153  | 93976791  | protein_coding | 10,88 | 0,0012807 |
| ENSG00000137767 | SQRDL     | 15 | 45631148  | 45691294  | protein_coding | 10,88 | 0,0006696 |
| ENSG00000111664 | GNB3      | 12 | 6839954   | 6847393   | protein_coding | 10,81 | 0,0012807 |
| ENSG00000012048 | BRCA1     | 17 | 43044295  | 43170245  | protein_coding | 10,80 | 0,0012807 |
| ENSG00000166352 | C11orf74  | 11 | 36594493  | 36659290  | protein_coding | 10,79 | 0,0025348 |
| ENSG00000163624 | CDS1      | 4  | 84582979  | 84651338  | protein_coding | 10,79 | 0,0000000 |
| ENSG00000168925 | CTRB1     | 16 | 75219000  | 75224924  | protein_coding | 10,75 | 0,0025348 |
| ENSG00000065057 | NTHL1     | 16 | 2039815   | 2047866   | protein_coding | 10,74 | 0,0012807 |
| ENSG00000181355 | OFCC1     | 6  | 9596110   | 10211608  | protein_coding | 10,70 | 0,0006696 |
| ENSG00000064655 | EYA2      | 20 | 46894624  | 47188844  | protein_coding | 10,68 | 0,0000000 |
| ENSG00000075884 | ARHGAP15  | 2  | 143091362 | 143768352 | protein_coding | 10,67 | 0,0012807 |
| ENSG00000046651 | OFD1      | X  | 13734745  | 13769353  | protein_coding | 10,64 | 0,0418702 |
| ENSG00000145375 | SPATA5    | 4  | 122923074 | 123319450 | protein_coding | 10,61 | 0,0000000 |

|                 |          |    |           |           |                |       |           |
|-----------------|----------|----|-----------|-----------|----------------|-------|-----------|
| ENSG00000140859 | KIFC3    | 16 | 57758217  | 57863053  | protein_coding | 10,59 | 0,0012807 |
| ENSG00000145506 | NKD2     | 5  | 1008829   | 1038943   | protein_coding | 10,59 | 0,0418702 |
| ENSG00000085117 | CD82     | 11 | 44564427  | 44620363  | protein_coding | 10,55 | 0,0257457 |
| ENSG00000112053 | SLC26A8  | 6  | 35943514  | 36024868  | protein_coding | 10,54 | 0,0050271 |
| ENSG00000144559 | TAMM41   | 3  | 11790442  | 11846919  | protein_coding | 10,51 | 0,0000000 |
| ENSG00000078053 | AMPH     | 7  | 38383704  | 38631567  | protein_coding | 10,51 | 0,0012807 |
| ENSG00000050405 | LIMA1    | 12 | 50175788  | 50283546  | protein_coding | 10,50 | 0,0000000 |
| ENSG00000111837 | MAK      | 6  | 10762723  | 10838555  | protein_coding | 10,50 | 0,0000000 |
| ENSG00000142408 | CACNG8   | 19 | 53963040  | 53990215  | protein_coding | 10,50 | 0,0075075 |
| ENSG00000140534 | TICRR    | 15 | 89575482  | 89631056  | protein_coding | 10,44 | 0,0000000 |
| ENSG00000076043 | REXO2    | 11 | 114439386 | 114450279 | protein_coding | 10,42 | 0,0012807 |
| ENSG00000180176 | TH       | 11 | 2163929   | 2171877   | protein_coding | 10,40 | 0,1245284 |
| ENSG00000225830 | ERCC6    | 10 | 49455368  | 49539538  | protein_coding | 10,31 | 0,0000000 |
| ENSG00000184156 | KCNQ3    | 8  | 132120859 | 132480953 | protein_coding | 10,25 | 0,0006696 |
| ENSG00000167311 | ART5     | 11 | 3638503   | 3642316   | protein_coding | 10,20 | 0,0012807 |
| ENSG00000114805 | PLCH1    | 3  | 155375580 | 155745067 | protein_coding | 10,20 | 0,0184474 |
| ENSG00000172935 | MRGPRF   | 11 | 69004395  | 69013409  | protein_coding | 10,18 | 0,0012807 |
| ENSG00000141452 | C18orf8  | 18 | 23503470  | 23531807  | protein_coding | 10,18 | 0,0000000 |
| ENSG00000167281 | RBFOX3   | 17 | 79089345  | 79516148  | protein_coding | 10,18 | 0,0012807 |
| ENSG00000135951 | TSGA10   | 2  | 98997261  | 99154964  | protein_coding | 10,18 | 0,0000000 |
| ENSG00000182111 | ZNF716   | 7  | 57450177  | 57473546  | protein_coding | 10,17 | 0,0062591 |
| ENSG00000140743 | CDR2     | 16 | 22345936  | 22437165  | protein_coding | 10,14 | 0,0000000 |
| ENSG00000175894 | TSPEAR   | 21 | 44497892  | 44711580  | protein_coding | 10,13 | 0,0037996 |
| ENSG00000166823 | MESP1    | 15 | 89748661  | 89751310  | protein_coding | 10,11 | 0,0012807 |
| ENSG00000139151 | PLCZ1    | 12 | 18683169  | 18738057  | protein_coding | 10,10 | 0,1245284 |
| ENSG00000150750 | C11orf53 | 11 | 111255982 | 111286401 | protein_coding | 10,05 | 0,2600087 |
| ENSG00000164941 | INTS8    | 8  | 94813311  | 94881746  | protein_coding | 10,02 | 0,0012807 |
| ENSG00000115425 | PECR     | 2  | 215996329 | 216082955 | protein_coding | 9,99  | 0,0000000 |
| ENSG00000133640 | LRR1Q1   | 12 | 85036314  | 85263224  | protein_coding | 9,97  | 0,0075075 |
| ENSG00000175449 | RFESD    | 5  | 95646754  | 95684773  | protein_coding | 9,97  | 0,0012807 |
| ENSG00000180305 | WFDC10A  | 20 | 45629526  | 45631196  | protein_coding | 9,91  | 0,0184474 |
| ENSG00000106648 | GALNTL5  | 7  | 151956379 | 152019934 | protein_coding | 9,90  | 0,3269660 |
| ENSG00000157445 | CACNA2D3 | 3  | 54122547  | 55074557  | protein_coding | 9,88  | 0,0000000 |
| ENSG00000070882 | OSBPL3   | 7  | 24796539  | 24981634  | protein_coding | 9,87  | 0,0000000 |
| ENSG00000148513 | ANKRD30A | 10 | 37125788  | 37384111  | protein_coding | 9,80  | 0,0418702 |
| ENSG00000177174 | OR14C36  | 1  | 248348775 | 248349713 | protein_coding | 9,80  | 0,1245284 |
| ENSG00000085871 | MGST2    | 4  | 139665768 | 139740745 | protein_coding | 9,73  | 0,0000000 |
| ENSG00000121057 | AKAP1    | 17 | 57085092  | 57121349  | protein_coding | 9,72  | 0,0075075 |
| ENSG00000164270 | HTR4     | 5  | 148451032 | 148677235 | protein_coding | 9,70  | 0,0025348 |
| ENSG00000128594 | LRRC4    | 7  | 128027071 | 128032107 | protein_coding | 9,70  | 0,1245284 |
| ENSG00000103056 | SMPD3    | 16 | 68358325  | 68448688  | protein_coding | 9,64  | 0,0012807 |
| ENSG00000162755 | KLHDC9   | 1  | 161098361 | 161100346 | protein_coding | 9,62  | 0,0012807 |
| ENSG00000164162 | ANAPC10  | 4  | 144967112 | 145098541 | protein_coding | 9,60  | 0,0050271 |
| ENSG00000143355 | LHX9     | 1  | 197911902 | 197935478 | protein_coding | 9,60  | 0,0012807 |
| ENSG00000147262 | GPR119   | X  | 130384440 | 130385447 | protein_coding | 9,60  | 0,0418702 |
| ENSG00000143507 | DUSP10   | 1  | 221701424 | 221742176 | protein_coding | 9,60  | 0,0012807 |
| ENSG00000127423 | AUNIP    | 1  | 25831913  | 25859458  | protein_coding | 9,56  | 0,0000000 |
| ENSG00000145700 | ANKRD31  | 5  | 75068275  | 75236878  | protein_coding | 9,53  | 0,0012807 |
| ENSG00000178997 | EXD1     | 15 | 41182725  | 41230743  | protein_coding | 9,53  | 0,0000000 |
| ENSG00000042062 | FAM65C   | 20 | 50586108  | 50691528  | protein_coding | 9,48  | 0,0000000 |
| ENSG00000151725 | CENPU    | 4  | 184694618 | 184734133 | protein_coding | 9,46  | 0,0000000 |
| ENSG00000206043 | C18orf63 | 18 | 74315813  | 74359187  | protein_coding | 9,45  | 0,2229774 |
| ENSG00000177675 | CD163L1  | 12 | 7346685   | 7479897   | protein_coding | 9,42  | 0,0012807 |
| ENSG00000167550 | RHEBL1   | 12 | 49064685  | 49070025  | protein_coding | 9,42  | 0,0012807 |
| ENSG00000244020 | MT1HL1   | 1  | 237004103 | 237004418 | protein_coding | 9,36  | 0,0062591 |

|                 |           |    |           |           |                |      |           |
|-----------------|-----------|----|-----------|-----------|----------------|------|-----------|
| ENSG00000135423 | GLS2      | 12 | 56470944  | 56488414  | protein_coding | 9,36 | 0,0012807 |
| ENSG00000148200 | NR6A1     | 9  | 124517275 | 124771310 | protein_coding | 9,35 | 0,0000000 |
| ENSG00000164430 | MB21D1    | 6  | 73413515  | 73452276  | protein_coding | 9,31 | 0,0000000 |
| ENSG00000138182 | KIF20B    | 10 | 89701610  | 89774939  | protein_coding | 9,29 | 0,0000000 |
| ENSG00000129048 | ACKR4     | 3  | 132597237 | 132618967 | protein_coding | 9,28 | 0,0012807 |
| ENSG00000111799 | COL12A1   | 6  | 75084326  | 75206051  | protein_coding | 9,26 | 0,0000000 |
| ENSG00000182459 | TEX19     | 17 | 82359247  | 82363776  | protein_coding | 9,25 | 0,0418702 |
| ENSG00000137501 | SYTL2     | 11 | 85694224  | 85811159  | protein_coding | 9,25 | 0,0000000 |
| ENSG00000173578 | XCR1      | 3  | 46017024  | 46027742  | protein_coding | 9,24 | 0,0050271 |
| ENSG00000171804 | WDR87     | 19 | 37884823  | 37906677  | protein_coding | 9,23 | 0,0050271 |
| ENSG00000160801 | PTH1R     | 3  | 46877746  | 46903799  | protein_coding | 9,23 | 0,0012807 |
| ENSG00000038295 | TLL1      | 4  | 165873258 | 166103895 | protein_coding | 9,19 | 0,0000000 |
| ENSG00000130167 | TSPAN16   | 19 | 11296139  | 11326996  | protein_coding | 9,17 | 0,0062591 |
| ENSG00000122543 | OCM       | 7  | 5879827   | 5886362   | protein_coding | 9,17 | 0,2600087 |
| ENSG00000214814 | FER1L6    | 8  | 123851987 | 124120061 | protein_coding | 9,16 | 0,0025348 |
| ENSG00000134709 | HOOK1     | 1  | 59814786  | 59876378  | protein_coding | 9,15 | 0,0000000 |
| ENSG00000186710 | CFAP73    | 12 | 113149858 | 113159276 | protein_coding | 9,15 | 0,0012807 |
| ENSG00000174469 | CNTNAP2   | 7  | 146116002 | 148420998 | protein_coding | 9,14 | 0,0000000 |
| ENSG00000142405 | NLRP12    | 19 | 53793603  | 53824394  | protein_coding | 9,12 | 0,0012807 |
| ENSG00000129007 | CALML4    | 15 | 68190705  | 68206110  | protein_coding | 9,11 | 0,0538744 |
| ENSG00000177103 | DSCAML1   | 11 | 117427773 | 117817525 | protein_coding | 9,11 | 0,0050271 |
| ENSG00000100354 | TNRC6B    | 22 | 40044817  | 40335808  | protein_coding | 9,09 | 0,0538744 |
| ENSG00000123473 | STIL      | 1  | 47250139  | 47314147  | protein_coding | 9,06 | 0,0000000 |
| ENSG00000197734 | C14orf178 | 14 | 77760830  | 77769742  | protein_coding | 9,05 | 0,0609506 |
| ENSG00000077327 | SPAG6     | 10 | 22345445  | 22454224  | protein_coding | 9,04 | 0,0000000 |
| ENSG00000172673 | THEMIS    | 6  | 127708072 | 127918631 | protein_coding | 9,03 | 0,0000000 |
| ENSG00000115297 | TLX2      | 2  | 74513463  | 74517147  | protein_coding | 9,00 | 0,0025348 |
| ENSG00000075275 | CELSR1    | 22 | 46360834  | 46537170  | protein_coding | 8,99 | 0,0000000 |
| ENSG00000172000 | ZNF556    | 19 | 2867335   | 2883445   | protein_coding | 8,98 | 0,0075075 |
| ENSG00000148835 | TAF5      | 10 | 103367967 | 103389065 | protein_coding | 8,96 | 0,0012807 |
| ENSG00000183690 | EFHC2     | X  | 44147882  | 44343672  | protein_coding | 8,96 | 0,0000000 |
| ENSG00000150628 | SPATA4    | 4  | 176184638 | 176195671 | protein_coding | 8,94 | 0,0000000 |
| ENSG00000145220 | LYAR      | 4  | 4267701   | 4290169   | protein_coding | 8,92 | 0,0012807 |
| ENSG00000145934 | TENM2     | 5  | 167284799 | 168264157 | protein_coding | 8,92 | 0,0062591 |
| ENSG00000140876 | NUDT7     | 16 | 77722492  | 77742260  | protein_coding | 8,92 | 0,0012807 |
| ENSG00000189252 | SPANXN3   | X  | 143508735 | 143517475 | protein_coding | 8,90 | 0,0025348 |
| ENSG00000140367 | UBE2Q2    | 15 | 75843285  | 75901078  | protein_coding | 8,90 | 0,0006696 |
| ENSG00000105929 | ATP6VOA4  | 7  | 138706295 | 138799560 | protein_coding | 8,85 | 0,0062591 |
| ENSG00000168062 | BATF2     | 11 | 64987943  | 64997045  | protein_coding | 8,83 | 0,0012807 |
| ENSG00000257743 | MGAM2     | 7  | 142111749 | 14222324  | protein_coding | 8,83 | 0,0586426 |
| ENSG00000102452 | NALCN     | 13 | 101053776 | 101416492 | protein_coding | 8,82 | 0,0000000 |
| ENSG00000173702 | MUC13     | 3  | 124905442 | 124953819 | protein_coding | 8,82 | 0,0717418 |
| ENSG00000174567 | GOLT1A    | 1  | 204198160 | 204214092 | protein_coding | 8,82 | 0,0184474 |
| ENSG00000124019 | FAM124B   | 2  | 224378698 | 224402085 | protein_coding | 8,81 | 0,0012807 |
| ENSG00000036448 | MYOM2     | 8  | 2045040   | 2165552   | protein_coding | 8,80 | 0,0111464 |
| ENSG00000151789 | ZNF385D   | 3  | 21412222  | 22373321  | protein_coding | 8,75 | 0,0006696 |
| ENSG00000164929 | BAALC     | 8  | 103140710 | 103230305 | protein_coding | 8,75 | 0,0000000 |
| ENSG00000169567 | HINT1     | 5  | 131159027 | 131171735 | protein_coding | 8,71 | 0,0000000 |
| ENSG00000113302 | IL12B     | 5  | 159314783 | 159330887 | protein_coding | 8,70 | 0,0012807 |
| ENSG00000163132 | MSX1      | 4  | 4859666   | 4863936   | protein_coding | 8,70 | 0,0012807 |
| ENSG00000150672 | DLG2      | 11 | 83455012  | 85627922  | protein_coding | 8,69 | 0,0000000 |
| ENSG00000134183 | GNAT2     | 1  | 109603267 | 109619929 | protein_coding | 8,68 | 0,0012807 |
| ENSG00000005075 | POLR2J    | 7  | 102473118 | 102478907 | protein_coding | 8,66 | 0,0012807 |
| ENSG00000148948 | LRRC4C    | 11 | 40114203  | 41459773  | protein_coding | 8,64 | 0,0717418 |
| ENSG00000162643 | WDR63     | 1  | 84999147  | 85133138  | protein_coding | 8,61 | 0,0172684 |

|                 |          |    |           |           |                |      |           |
|-----------------|----------|----|-----------|-----------|----------------|------|-----------|
| ENSG00000167210 | LOXHD1   | 18 | 46476972  | 46657033  | protein_coding | 8,60 | 0,0012807 |
| ENSG00000197971 | MBP      | 18 | 76978827  | 77133683  | protein_coding | 8,57 | 0,0000000 |
| ENSG00000169933 | FRMPD4   | X  | 12138466  | 12724523  | protein_coding | 8,57 | 0,0012807 |
| ENSG00000142609 | CFAP74   | 1  | 1921951   | 2003837   | protein_coding | 8,57 | 0,0025348 |
| ENSG00000186453 | FAM228A  | 2  | 24175069  | 24200849  | protein_coding | 8,56 | 0,0148097 |
| ENSG00000128944 | KNSTRN   | 15 | 40382721  | 40394246  | protein_coding | 8,55 | 0,0000000 |
| ENSG00000124641 | MED20    | 6  | 41905354  | 41921139  | protein_coding | 8,54 | 0,0006696 |
| ENSG00000132749 | MTL5     | 11 | 68707440  | 68751564  | protein_coding | 8,51 | 0,0006696 |
| ENSG00000204952 | FBXO47   | 17 | 38936432  | 38967402  | protein_coding | 8,50 | 0,0111464 |
| ENSG00000188124 | OR2AG2   | 11 | 6767987   | 6769055   | protein_coding | 8,50 | 0,0111464 |
| ENSG00000083457 | ITGAE    | 17 | 3714628   | 3801243   | protein_coding | 8,48 | 0,0012807 |
| ENSG00000112312 | GMNN     | 6  | 24774931  | 24786099  | protein_coding | 8,46 | 0,0000000 |
| ENSG00000174928 | C3orf33  | 3  | 155762617 | 155806351 | protein_coding | 8,46 | 0,0000000 |
| ENSG00000189046 | ALKBH2   | 12 | 109088188 | 109093631 | protein_coding | 8,45 | 0,0012807 |
| ENSG00000135090 | TAOK3    | 12 | 118149801 | 118372945 | protein_coding | 8,44 | 0,0012807 |
| ENSG00000147419 | CCDC25   | 8  | 27733311  | 27772653  | protein_coding | 8,42 | 0,0000000 |
| ENSG00000231274 | SBK3     | 19 | 55540656  | 55545543  | protein_coding | 8,40 | 0,0418702 |
| ENSG00000167941 | SOST     | 17 | 43753731  | 43758788  | protein_coding | 8,38 | 0,0172684 |
| ENSG00000073111 | MCM2     | 3  | 127598223 | 127622436 | protein_coding | 8,36 | 0,0000000 |
| ENSG00000178752 | FAM132B  | 2  | 238158982 | 238168900 | protein_coding | 8,34 | 0,0000000 |
| ENSG00000151655 | ITIH2    | 10 | 7703269   | 7749520   | protein_coding | 8,33 | 0,0012807 |
| ENSG00000124784 | RIOK1    | 6  | 7389496   | 7418037   | protein_coding | 8,32 | 0,0000000 |
| ENSG00000171729 | TMEM51   | 1  | 15152532  | 15220480  | protein_coding | 8,32 | 0,0050271 |
| ENSG00000187720 | THSD4    | 15 | 71096952  | 71783383  | protein_coding | 8,32 | 0,0000000 |
| ENSG00000122550 | KLHL7    | 7  | 23105758  | 23177914  | protein_coding | 8,31 | 0,0000000 |
| ENSG00000186832 | KRT16    | 17 | 41609778  | 41615899  | protein_coding | 8,30 | 0,1245284 |
| ENSG00000007933 | FMO3     | 1  | 171090877 | 171117819 | protein_coding | 8,30 | 0,1245284 |
| ENSG00000113356 | POLR3G   | 5  | 90471748  | 90514553  | protein_coding | 8,28 | 0,0000000 |
| ENSG00000197769 | MAP1LC3C | 1  | 241995490 | 241999073 | protein_coding | 8,27 | 0,0418702 |
| ENSG00000088002 | SULT2B1  | 19 | 48552075  | 48599425  | protein_coding | 8,26 | 0,0037996 |
| ENSG00000105499 | PLA2G4C  | 19 | 48047843  | 48110817  | protein_coding | 8,25 | 0,0000000 |
| ENSG00000198825 | INPP5F   | 10 | 119726097 | 119829278 | protein_coding | 8,24 | 0,0012807 |
| ENSG00000161040 | FBXL13   | 7  | 102813230 | 103074843 | protein_coding | 8,23 | 0,0335607 |
| ENSG00000169856 | ONECUT1  | 15 | 52756989  | 52791078  | protein_coding | 8,22 | 0,0025348 |
| ENSG00000180016 | OR1E1    | 17 | 3397104   | 3398410   | protein_coding | 8,20 | 0,1245284 |
| ENSG00000166596 | CFAP52   | 17 | 9576627   | 9643459   | protein_coding | 8,17 | 0,0509539 |
| ENSG00000103995 | CEP152   | 15 | 48712928  | 48811146  | protein_coding | 8,16 | 0,0000000 |
| ENSG00000171817 | ZNF540   | 19 | 37551406  | 37614097  | protein_coding | 8,16 | 0,0012807 |
| ENSG00000214694 | ARHGEF33 | 2  | 38889880  | 38975449  | protein_coding | 8,15 | 0,0012807 |
| ENSG00000122691 | TWIST1   | 7  | 19020991  | 19117672  | protein_coding | 8,15 | 0,0000000 |
| ENSG00000106603 | COA1     | 7  | 43608456  | 43729717  | protein_coding | 8,15 | 0,0000000 |
| ENSG00000167077 | MEI1     | 22 | 41699499  | 41799456  | protein_coding | 8,13 | 0,0012807 |
| ENSG00000182103 | FAM181B  | 11 | 82729941  | 82733864  | protein_coding | 8,12 | 0,0012807 |
| ENSG00000059378 | PARP12   | 7  | 140023744 | 140063721 | protein_coding | 8,11 | 0,0000000 |
| ENSG00000100024 | UPB1     | 22 | 24494107  | 24528390  | protein_coding | 8,11 | 0,0257457 |
| ENSG00000135931 | ARMC9    | 2  | 231198546 | 231374837 | protein_coding | 8,10 | 0,0000000 |
| ENSG00000148156 | ACTL7B   | 9  | 108854589 | 108856967 | protein_coding | 8,07 | 0,0586426 |
| ENSG00000107371 | EXOSC3   | 9  | 37766978  | 37801437  | protein_coding | 8,01 | 0,0012807 |
| ENSG00000186231 | KLHL32   | 6  | 96924620  | 97140754  | protein_coding | 8,01 | 0,0000000 |
| ENSG00000204086 | RPA4     | X  | 96883908  | 96885467  | protein_coding | 8,01 | 0,0012807 |
| ENSG00000070190 | DAPP1    | 4  | 99816833  | 99870154  | protein_coding | 8,01 | 0,6606414 |
| ENSG00000144401 | METTL21A | 2  | 207580631 | 207625928 | protein_coding | 8,00 | 0,0000000 |
| ENSG00000153684 | GOLGA8F  | 15 | 28378621  | 28392018  | protein_coding | 8,00 | 0,3269660 |
| ENSG00000139610 | CELA1    | 12 | 51328443  | 51346679  | protein_coding | 8,00 | 0,0012807 |
| ENSG00000187790 | FANCM    | 14 | 45135940  | 45200890  | protein_coding | 7,99 | 0,0000000 |

|                 |            |    |           |           |                |      |           |
|-----------------|------------|----|-----------|-----------|----------------|------|-----------|
| ENSG00000096433 | ITPR3      | 6  | 33620365  | 33696574  | protein_coding | 7,98 | 0,0000000 |
| ENSG00000104290 | FZD3       | 8  | 28494205  | 28574268  | protein_coding | 7,97 | 0,0000000 |
| ENSG00000066629 | EML1       | 14 | 99737693  | 99942060  | protein_coding | 7,97 | 0,0000000 |
| ENSG00000148798 | INA        | 10 | 103277163 | 103290351 | protein_coding | 7,96 | 0,0075075 |
| ENSG00000163950 | SLBP       | 4  | 1692800   | 1712555   | protein_coding | 7,96 | 0,0000000 |
| ENSG00000233757 | ENSG000002 | 2  | 95207535  | 95259774  | protein_coding | 7,95 | 0,1245284 |
| ENSG00000121104 | FAM117A    | 17 | 49710332  | 49789180  | protein_coding | 7,92 | 0,0000000 |
| ENSG00000056277 | ZNF280C    | X  | 130202711 | 130268899 | protein_coding | 7,92 | 0,0000000 |
| ENSG00000112029 | FBXO5      | 6  | 152970519 | 152983579 | protein_coding | 7,91 | 0,1245284 |
| ENSG00000072657 | TRHDE      | 12 | 72087266  | 72670757  | protein_coding | 7,91 | 0,0012807 |
| ENSG00000177301 | KCNA2      | 1  | 110593580 | 110631474 | protein_coding | 7,91 | 0,0184474 |
| ENSG00000145808 | ADAMTS19   | 5  | 129460265 | 129738683 | protein_coding | 7,90 | 0,6142622 |
| ENSG00000256061 | DYX1C1     | 15 | 55410525  | 55508234  | protein_coding | 7,90 | 0,0012807 |
| ENSG00000168078 | PBK        | 8  | 27809620  | 27838095  | protein_coding | 7,90 | 0,0012807 |
| ENSG00000136014 | USP44      | 12 | 95516560  | 95551490  | protein_coding | 7,89 | 0,0012807 |
| ENSG00000156374 | PCGF6      | 10 | 103302796 | 103351134 | protein_coding | 7,89 | 0,0025348 |
| ENSG00000008083 | JARID2     | 6  | 15246296  | 15522040  | protein_coding | 7,86 | 0,0000000 |
| ENSG00000109458 | GAB1       | 4  | 143336762 | 143474568 | protein_coding | 7,82 | 0,0000000 |
| ENSG00000090932 | DLL3       | 19 | 39498895  | 39508481  | protein_coding | 7,82 | 0,0012807 |
| ENSG00000173610 | UGT2A1     | 4  | 69588417  | 69653249  | protein_coding | 7,80 | 0,0418702 |
| ENSG00000156853 | ZNF689     | 16 | 30602558  | 30624012  | protein_coding | 7,75 | 0,1598647 |
| ENSG00000071539 | TRIP13     | 5  | 892643    | 919357    | protein_coding | 7,75 | 0,0000000 |
| ENSG00000164104 | HMGB2      | 4  | 173331695 | 173335125 | protein_coding | 7,73 | 0,0000000 |
| ENSG00000183571 | PGPEP1L    | 15 | 98968230  | 99007795  | protein_coding | 7,72 | 0,0184474 |
| ENSG00000119801 | YPEL5      | 2  | 30146941  | 30160533  | protein_coding | 7,71 | 0,0012807 |
| ENSG00000143033 | MTF2       | 1  | 93079235  | 93139081  | protein_coding | 7,71 | 0,0025348 |
| ENSG00000109881 | CCDC34     | 11 | 27330827  | 27363868  | protein_coding | 7,71 | 0,0257457 |
| ENSG00000135346 | CGA        | 6  | 87085498  | 87095406  | protein_coding | 7,70 | 0,0418702 |
| ENSG00000172179 | PRL        | 6  | 22287244  | 22297501  | protein_coding | 7,70 | 0,0111464 |
| ENSG00000169752 | NRG4       | 15 | 75935969  | 76059795  | protein_coding | 7,69 | 0,0000000 |
| ENSG00000168785 | TSPAN5     | 4  | 98470367  | 98658629  | protein_coding | 7,65 | 0,0000000 |
| ENSG00000187537 | POTEG      | 14 | 19402486  | 19434341  | protein_coding | 7,62 | 0,1245284 |
| ENSG00000164362 | TERT       | 5  | 1253147   | 1295069   | protein_coding | 7,60 | 0,0418702 |
| ENSG00000162460 | TMEM82     | 1  | 15742422  | 15747982  | protein_coding | 7,60 | 0,1245284 |
| ENSG00000073350 | LLGL2      | 17 | 75525080  | 75575208  | protein_coding | 7,58 | 0,0050271 |
| ENSG00000180448 | HMHA1      | 19 | 1065923   | 1086628   | protein_coding | 7,54 | 0,0000000 |
| ENSG00000153993 | SEMA3D     | 7  | 84995553  | 85186855  | protein_coding | 7,50 | 0,0012807 |
| ENSG00000237452 | BHMG1      | 19 | 45733251  | 45764534  | protein_coding | 7,50 | 0,3269660 |
| ENSG00000198759 | EGFL6      | X  | 13569605  | 13633575  | protein_coding | 7,50 | 0,2229774 |
| ENSG00000196550 | FAM72A     | 1  | 206186179 | 206204414 | protein_coding | 7,48 | 0,0000000 |
| ENSG00000101384 | JAG1       | 20 | 10637684  | 10674107  | protein_coding | 7,48 | 0,0062591 |
| ENSG00000167977 | KCTD5      | 16 | 2682475   | 2709030   | protein_coding | 7,47 | 0,0012807 |
| ENSG00000156697 | UTP14A     | X  | 129906121 | 129929761 | protein_coding | 7,46 | 0,0000000 |
| ENSG00000188452 | CERKL      | 2  | 181536676 | 181680665 | protein_coding | 7,41 | 0,0000000 |
| ENSG00000136319 | TTC5       | 14 | 20256558  | 20305994  | protein_coding | 7,37 | 0,0000000 |
| ENSG00000178031 | ADAMTSL1   | 9  | 18473894  | 18910950  | protein_coding | 7,37 | 0,0012807 |
| ENSG00000144161 | ZC3H8      | 2  | 112211525 | 112255136 | protein_coding | 7,36 | 0,0000000 |
| ENSG00000112414 | ADGRG6     | 6  | 142301854 | 142446266 | protein_coding | 7,34 | 0,0012807 |
| ENSG00000127585 | FBXL16     | 16 | 692498    | 705829    | protein_coding | 7,33 | 0,0012807 |
| ENSG00000137807 | KIF23      | 15 | 69414246  | 69448427  | protein_coding | 7,32 | 0,0000000 |
| ENSG00000165480 | SKA3       | 13 | 21153595  | 21176602  | protein_coding | 7,32 | 0,0000000 |
| ENSG00000185306 | C12orf56   | 12 | 64264762  | 64391192  | protein_coding | 7,30 | 0,1245284 |
| ENSG00000183775 | KCTD16     | 5  | 144170832 | 144485686 | protein_coding | 7,28 | 0,1867869 |
| ENSG00000115687 | PASK       | 2  | 241106099 | 241150264 | protein_coding | 7,27 | 0,0000000 |
| ENSG00000164287 | CDC20B     | 5  | 55112995  | 55173175  | protein_coding | 7,27 | 0,0717418 |

|                 |            |    |           |           |                |      |           |
|-----------------|------------|----|-----------|-----------|----------------|------|-----------|
| ENSG00000134597 | RBMX2      | X  | 130401969 | 130413343 | protein_coding | 7,27 | 0,0012807 |
| ENSG00000133106 | EPSTI1     | 13 | 42886388  | 42992271  | protein_coding | 7,26 | 0,0000000 |
| ENSG00000106415 | GLCCI1     | 7  | 7968794   | 8094272   | protein_coding | 7,26 | 0,0000000 |
| ENSG00000186094 | AGBL4      | 1  | 48532855  | 50023913  | protein_coding | 7,25 | 0,0111464 |
| ENSG00000072571 | HMMR       | 5  | 163460203 | 163491945 | protein_coding | 7,23 | 0,0609506 |
| ENSG00000184990 | SIVA1      | 14 | 104753100 | 104768494 | protein_coding | 7,22 | 0,0012807 |
| ENSG00000164414 | SLC35A1    | 6  | 87470623  | 87512336  | protein_coding | 7,22 | 0,6702615 |
| ENSG00000034971 | MYOC       | 1  | 171635417 | 171652683 | protein_coding | 7,21 | 0,0105771 |
| ENSG00000184933 | OR6A2      | 11 | 6794627   | 6795783   | protein_coding | 7,20 | 0,3269660 |
| ENSG00000167487 | KLHL26     | 19 | 18636965  | 18671714  | protein_coding | 7,19 | 0,0000000 |
| ENSG00000166860 | ZBTB39     | 12 | 56998834  | 57006446  | protein_coding | 7,19 | 0,0075075 |
| ENSG00000137812 | CASC5      | 15 | 40594020  | 40664342  | protein_coding | 7,17 | 0,0111464 |
| ENSG00000187398 | LUZP2      | 11 | 24496970  | 25082631  | protein_coding | 7,16 | 0,0012807 |
| ENSG00000172301 | COPRS      | 17 | 31851864  | 31859337  | protein_coding | 7,15 | 0,0012807 |
| ENSG00000198691 | ABCA4      | 1  | 93992835  | 94121132  | protein_coding | 7,14 | 0,0257457 |
| ENSG00000198121 | LPAR1      | 9  | 110873263 | 111038458 | protein_coding | 7,13 | 0,0025348 |
| ENSG00000151611 | MMAA       | 4  | 145618263 | 145660035 | protein_coding | 7,11 | 0,0006696 |
| ENSG00000162961 | DPY30      | 2  | 31867809  | 32039812  | protein_coding | 7,11 | 0,0025348 |
| ENSG00000168418 | KCNG4      | 16 | 84218667  | 84239750  | protein_coding | 7,10 | 0,1245284 |
| ENSG00000171815 | PCDHB1     | 5  | 141051135 | 141059344 | protein_coding | 7,10 | 0,0012807 |
| ENSG00000157890 | MEGF11     | 15 | 65895079  | 66253747  | protein_coding | 7,10 | 0,0012807 |
| ENSG00000091181 | IL5RA      | 3  | 3066326   | 3126613   | protein_coding | 7,07 | 0,0037996 |
| ENSG00000166535 | A2ML1      | 12 | 8822472   | 8887001   | protein_coding | 7,06 | 0,0075075 |
| ENSG00000263155 | MYZAP      | 15 | 57591941  | 57685364  | protein_coding | 7,06 | 0,0000000 |
| ENSG00000217442 | SYCE3      | 22 | 50551112  | 50562905  | protein_coding | 7,06 | 0,0012807 |
| ENSG00000092470 | WDR76      | 15 | 43826963  | 43868419  | protein_coding | 7,05 | 0,0000000 |
| ENSG00000130762 | ARHGEF16   | 1  | 3454426   | 3481113   | protein_coding | 7,04 | 0,0012807 |
| ENSG00000268744 | ENSG000000 | 19 | 12379189  | 12401274  | protein_coding | 7,00 | 0,0012807 |
| ENSG00000133710 | SPINK5     | 5  | 148025683 | 148137289 | protein_coding | 7,00 | 0,3269660 |
| ENSG00000189023 | MAGEB16    | X  | 35798342  | 35803735  | protein_coding | 7,00 | 0,0418702 |
| ENSG00000154237 | LRRK1      | 15 | 100919215 | 101078254 | protein_coding | 6,99 | 0,0000000 |
| ENSG00000204564 | C6orf136   | 6  | 30647039  | 30653210  | protein_coding | 6,99 | 0,0000000 |
| ENSG00000189227 | C15orf61   | 15 | 67521068  | 67530143  | protein_coding | 6,98 | 0,0012807 |
| ENSG00000158402 | CDC25C     | 5  | 138285265 | 138338355 | protein_coding | 6,95 | 0,0111464 |
| ENSG00000196132 | MYT1       | 20 | 64151791  | 64242253  | protein_coding | 6,94 | 0,0184474 |
| ENSG00000137210 | TMEM14B    | 6  | 10747759  | 10852753  | protein_coding | 6,94 | 0,0012807 |
| ENSG00000197299 | BLM        | 15 | 90717327  | 90816165  | protein_coding | 6,93 | 0,0000000 |
| ENSG00000125872 | LRRN4      | 20 | 6040778   | 6054049   | protein_coding | 6,90 | 0,0012807 |
| ENSG00000259120 | SMIM6      | 17 | 75646243  | 75647977  | protein_coding | 6,90 | 0,0012807 |
| ENSG00000170325 | PRDM10     | 11 | 129899706 | 130002835 | protein_coding | 6,89 | 0,0000000 |
| ENSG00000175279 | APITD1     | 1  | 10430443  | 10442809  | protein_coding | 6,89 | 0,0418702 |
| ENSG00000165164 | CFAP47     | X  | 35919734  | 36385319  | protein_coding | 6,88 | 0,0012807 |
| ENSG00000184860 | SDR42E1    | 16 | 81988855  | 82011488  | protein_coding | 6,88 | 0,0050271 |
| ENSG00000112293 | GPLD1      | 6  | 24424565  | 24495205  | protein_coding | 6,85 | 0,0300092 |
| ENSG00000143842 | SOX13      | 1  | 204073115 | 204127743 | protein_coding | 6,84 | 0,0000000 |
| ENSG00000162385 | MAGOH      | 1  | 53226892  | 53238610  | protein_coding | 6,82 | 0,0000000 |
| ENSG00000198478 | SH3BGR2    | 6  | 79631283  | 79703659  | protein_coding | 6,81 | 0,0025348 |
| ENSG00000196581 | AJAP1      | 1  | 4654732   | 4792534   | protein_coding | 6,80 | 0,0418702 |
| ENSG00000181938 | GINS3      | 16 | 58295080  | 58406144  | protein_coding | 6,79 | 0,0000000 |
| ENSG00000188611 | ASAH2      | 10 | 50182778  | 50248610  | protein_coding | 6,78 | 0,0000000 |
| ENSG00000186952 | TMEM232    | 5  | 110289233 | 110738956 | protein_coding | 6,78 | 0,0012807 |
| ENSG00000198633 | ZNF534     | 19 | 52429187  | 52452315  | protein_coding | 6,77 | 0,0335607 |
| ENSG00000100592 | DAAM1      | 14 | 59188646  | 59371405  | protein_coding | 6,77 | 0,0012807 |
| ENSG00000224689 | ZNF812     | 19 | 9689924   | 9700817   | protein_coding | 6,77 | 0,6606414 |
| ENSG00000157368 | IL34       | 16 | 70579895  | 70660682  | protein_coding | 6,77 | 0,0062591 |



|                 |          |    |           |           |                |      |           |
|-----------------|----------|----|-----------|-----------|----------------|------|-----------|
| ENSG00000144962 | SPATA16  | 3  | 172889358 | 173141268 | protein_coding | 6,77 | 0,0062591 |
| ENSG00000165959 | CLMN     | 14 | 95181940  | 95319906  | protein_coding | 6,76 | 0,0025348 |
| ENSG00000185442 | FAM174B  | 15 | 92617443  | 92809884  | protein_coding | 6,75 | 0,0000000 |
| ENSG00000089101 | CFAP61   | 20 | 20052514  | 20360702  | protein_coding | 6,75 | 0,0000000 |
| ENSG00000100600 | LGMN     | 14 | 92703807  | 92748702  | protein_coding | 6,74 | 0,0000000 |
| ENSG00000157657 | ZNF618   | 9  | 113876282 | 114056591 | protein_coding | 6,74 | 0,1245284 |
| ENSG00000011332 | DPF1     | 19 | 38211006  | 38229714  | protein_coding | 6,74 | 0,2600087 |
| ENSG00000161944 | ASGR2    | 17 | 7101322   | 7115700   | protein_coding | 6,73 | 0,1867869 |
| ENSG00000187240 | DYNC2H1  | 11 | 103109431 | 103479863 | protein_coding | 6,72 | 0,0000000 |
| ENSG00000178381 | ZFAND2A  | 7  | 1152071   | 1160759   | protein_coding | 6,70 | 0,0000000 |
| ENSG00000154548 | SRSF12   | 6  | 89095959  | 89118081  | protein_coding | 6,70 | 0,0006696 |
| ENSG00000130347 | RTN4IP1  | 6  | 106571971 | 106629487 | protein_coding | 6,69 | 0,0000000 |
| ENSG00000186281 | GPAT2    | 2  | 96021946  | 96039451  | protein_coding | 6,69 | 0,1775672 |
| ENSG00000256525 | POLG2    | 17 | 64477785  | 64497036  | protein_coding | 6,67 | 0,0000000 |
| ENSG00000145526 | CDH18    | 5  | 19472951  | 20575873  | protein_coding | 6,66 | 0,0012807 |
| ENSG00000164758 | MED30    | 8  | 117520713 | 117540262 | protein_coding | 6,66 | 0,0012807 |
| ENSG00000091073 | DTX2     | 7  | 76461676  | 76505995  | protein_coding | 6,66 | 0,0012807 |
| ENSG00000152193 | RNF219   | 13 | 78614291  | 78659179  | protein_coding | 6,65 | 0,0000000 |
| ENSG00000144407 | PTH2R    | 2  | 208359714 | 208854503 | protein_coding | 6,64 | 0,0111464 |
| ENSG00000120332 | TNN      | 1  | 175067858 | 175148066 | protein_coding | 6,64 | 0,0050271 |
| ENSG00000087086 | FTL      | 19 | 48965301  | 48966878  | protein_coding | 6,64 | 0,0000000 |
| ENSG00000004468 | CD38     | 4  | 15778275  | 15853230  | protein_coding | 6,63 | 0,0012807 |
| ENSG00000180263 | FGD6     | 12 | 95076749  | 95217482  | protein_coding | 6,63 | 0,0000000 |
| ENSG00000142449 | FBN3     | 19 | 8065402   | 8149846   | protein_coding | 6,63 | 0,0717418 |
| ENSG00000166619 | BLCAP    | 20 | 37492472  | 37527931  | protein_coding | 6,61 | 0,0000000 |
| ENSG00000136573 | BLK      | 8  | 11494001  | 11564604  | protein_coding | 6,60 | 0,0538744 |
| ENSG00000146143 | PRIM2    | 6  | 57314805  | 57646849  | protein_coding | 6,59 | 0,0000000 |
| ENSG00000110944 | IL23A    | 12 | 56334174  | 56340410  | protein_coding | 6,58 | 0,0012807 |
| ENSG00000154646 | TMPRSS15 | 21 | 18269116  | 18485879  | protein_coding | 6,57 | 0,0012807 |
| ENSG00000114346 | ECT2     | 3  | 172750682 | 172821474 | protein_coding | 6,57 | 0,0000000 |
| ENSG00000180855 | ZNF443   | 19 | 12429707  | 12441112  | protein_coding | 6,56 | 0,0012807 |
| ENSG00000165632 | TAF3     | 10 | 7818504   | 8016627   | protein_coding | 6,54 | 0,1245284 |
| ENSG00000122952 | ZWINT    | 10 | 56357228  | 56361275  | protein_coding | 6,54 | 0,0000000 |
| ENSG00000130475 | FCHO1    | 19 | 17747718  | 17788568  | protein_coding | 6,53 | 0,0012807 |
| ENSG00000120647 | CCDC77   | 12 | 389273    | 442645    | protein_coding | 6,52 | 0,0000000 |
| ENSG00000057757 | PITHD1   | 1  | 23778405  | 23788232  | protein_coding | 6,51 | 0,0000000 |
| ENSG00000140374 | ETFA     | 15 | 76215355  | 76311472  | protein_coding | 6,50 | 0,0006696 |
| ENSG00000218819 | TDRD15   | 2  | 21123917  | 21143272  | protein_coding | 6,50 | 0,0025348 |
| ENSG00000004848 | ARX      | X  | 25003694  | 25015948  | protein_coding | 6,50 | 0,3269660 |
| ENSG00000203952 | CCDC160  | X  | 134237047 | 134246207 | protein_coding | 6,48 | 0,0012807 |
| ENSG00000134070 | IRAK2    | 3  | 10164865  | 10243743  | protein_coding | 6,47 | 0,0000000 |
| ENSG00000076248 | UNG      | 12 | 109097574 | 109110992 | protein_coding | 6,44 | 0,0000000 |
| ENSG00000115539 | PDCL3    | 2  | 100562690 | 100576735 | protein_coding | 6,43 | 0,0012807 |
| ENSG00000133641 | C12orf29 | 12 | 88033846  | 88050160  | protein_coding | 6,42 | 0,0025348 |
| ENSG00000066032 | CTNNA2   | 2  | 79185231  | 80648861  | protein_coding | 6,42 | 0,0000000 |
| ENSG00000150625 | GPM6A    | 4  | 175632934 | 176002664 | protein_coding | 6,39 | 0,0012807 |
| ENSG00000173409 | ARV1     | 1  | 230978981 | 231000595 | protein_coding | 6,39 | 0,0075075 |
| ENSG00000100629 | CEP128   | 14 | 80476983  | 80959517  | protein_coding | 6,38 | 0,0000000 |
| ENSG00000065609 | SNAP91   | 6  | 83552880  | 83709691  | protein_coding | 6,36 | 0,0012807 |
| ENSG00000139835 | GRTP1    | 13 | 113324164 | 113364148 | protein_coding | 6,34 | 0,0000000 |
| ENSG00000163508 | EOMES    | 3  | 27715949  | 27722711  | protein_coding | 6,32 | 0,2600087 |
| ENSG00000153140 | CETN3    | 5  | 90392261  | 90409786  | protein_coding | 6,31 | 0,1245284 |
| ENSG00000163249 | CCNYL1   | 2  | 207711540 | 207761839 | protein_coding | 6,31 | 0,0012807 |
| ENSG00000118194 | TNNT2    | 1  | 201359008 | 201377762 | protein_coding | 6,31 | 0,0335607 |
| ENSG00000128683 | GAD1     | 2  | 170813213 | 170861151 | protein_coding | 6,31 | 0,0012807 |

|                 |          |    |           |           |                |      |           |
|-----------------|----------|----|-----------|-----------|----------------|------|-----------|
| ENSG00000101624 | CEP76    | 18 | 12661833  | 12702777  | protein_coding | 6,29 | 0,0000000 |
| ENSG00000183765 | CHEK2    | 22 | 28687743  | 28742422  | protein_coding | 6,28 | 0,0012807 |
| ENSG00000141469 | SLC14A1  | 18 | 45724127  | 45752520  | protein_coding | 6,28 | 0,0012807 |
| ENSG00000213551 | DNAJC9   | 10 | 73183362  | 73248862  | protein_coding | 6,27 | 0,0012807 |
| ENSG00000187862 | TTC24    | 1  | 156579727 | 156586770 | protein_coding | 6,26 | 0,0111464 |
| ENSG00000100330 | MTMR3    | 22 | 29883155  | 30030866  | protein_coding | 6,25 | 0,0000000 |
| ENSG00000105278 | ZFR2     | 19 | 3804024   | 3869032   | protein_coding | 6,23 | 0,2127456 |
| ENSG00000113749 | HRH2     | 5  | 175658030 | 175686242 | protein_coding | 6,21 | 0,0012807 |
| ENSG00000066379 | ZNRD1    | 6  | 30058899  | 30064909  | protein_coding | 6,21 | 0,0000000 |
| ENSG00000154040 | CABYR    | 18 | 24138956  | 24161603  | protein_coding | 6,21 | 0,0000000 |
| ENSG00000164532 | TBX20    | 7  | 35202430  | 35254147  | protein_coding | 6,20 | 0,0418702 |
| ENSG00000257365 | FNTB     | 14 | 64986720  | 65062652  | protein_coding | 6,19 | 0,0012807 |
| ENSG00000133863 | TEX15    | 8  | 30831544  | 30890606  | protein_coding | 6,17 | 0,0012807 |
| ENSG00000056291 | NPFFR2   | 4  | 72031804  | 72148067  | protein_coding | 6,17 | 0,0995111 |
| ENSG00000078487 | ZCWPW1   | 7  | 100400826 | 100428992 | protein_coding | 6,14 | 0,0538744 |
| ENSG00000127824 | TUBA4A   | 2  | 219249711 | 219278170 | protein_coding | 6,14 | 0,0012807 |
| ENSG00000090581 | GNPTG    | 16 | 1351923   | 1364113   | protein_coding | 6,13 | 0,0000000 |
| ENSG00000214491 | SEC14L6  | 22 | 30522799  | 30546682  | protein_coding | 6,12 | 0,0012807 |
| ENSG00000158516 | CPA2     | 7  | 130266827 | 130289798 | protein_coding | 6,09 | 0,0012807 |
| ENSG00000169946 | ZFPM2    | 8  | 104590733 | 105804532 | protein_coding | 6,09 | 0,0000000 |
| ENSG00000197124 | ZNF682   | 19 | 19997058  | 20039506  | protein_coding | 6,09 | 0,0012807 |
| ENSG00000106069 | CHN2     | 7  | 29122274  | 29514328  | protein_coding | 6,08 | 0,0000000 |
| ENSG00000164070 | HSPA4L   | 4  | 127781821 | 127840733 | protein_coding | 6,08 | 0,0012807 |
| ENSG00000166664 | CHRFAM7A | 15 | 30357766  | 30393849  | protein_coding | 6,07 | 0,0000000 |
| ENSG00000081059 | TCF7     | 5  | 134114711 | 134151865 | protein_coding | 6,06 | 0,0000000 |
| ENSG00000173846 | PLK3     | 1  | 44800225  | 44805990  | protein_coding | 6,05 | 0,0012807 |
| ENSG00000065320 | NTN1     | 17 | 9021542   | 9244000   | protein_coding | 6,04 | 0,0012807 |
| ENSG00000140835 | CHST4    | 16 | 71525233  | 71538746  | protein_coding | 6,04 | 0,0538744 |
| ENSG00000176769 | TCERG1L  | 10 | 131092391 | 131311721 | protein_coding | 6,04 | 0,1598647 |
| ENSG00000072832 | CRMP1    | 4  | 5748084   | 5893058   | protein_coding | 6,03 | 0,0000000 |
| ENSG00000121621 | KIF18A   | 11 | 28020620  | 28108308  | protein_coding | 6,03 | 0,0000000 |
| ENSG00000137601 | NEK1     | 4  | 169393275 | 169612629 | protein_coding | 6,03 | 0,0000000 |
| ENSG00000111199 | TRPV4    | 12 | 109783085 | 109833401 | protein_coding | 6,03 | 0,1598647 |
| ENSG00000118402 | ELOVL4   | 6  | 79914812  | 79947580  | protein_coding | 6,02 | 0,0012807 |
| ENSG00000169894 | MUC3A    | 7  | 100949555 | 100968346 | protein_coding | 6,02 | 0,0006696 |
| ENSG00000186732 | MPPED1   | 22 | 43411196  | 43507848  | protein_coding | 6,00 | 0,0025348 |
| ENSG00000140798 | ABCC12   | 16 | 48082973  | 48156018  | protein_coding | 6,00 | 0,0111464 |
| ENSG00000156206 | CFAP161  | 15 | 81007033  | 81149175  | protein_coding | 6,00 | 0,0062591 |
| ENSG00000105996 | HOXA2    | 7  | 27100354  | 27102811  | protein_coding | 6,00 | 0,0062591 |
| ENSG00000186352 | ANKRD37  | 4  | 185396021 | 185400628 | protein_coding | 6,00 | 0,0000000 |
| ENSG00000063127 | SLC6A16  | 19 | 49289638  | 49325225  | protein_coding | 5,99 | 0,0000000 |
| ENSG00000171365 | CLCN5    | X  | 49922615  | 50099235  | protein_coding | 5,99 | 0,0111464 |
| ENSG00000117477 | CCDC181  | 1  | 169394870 | 169460669 | protein_coding | 5,98 | 0,0062591 |
| ENSG00000118197 | DDX59    | 1  | 200623896 | 200669969 | protein_coding | 5,98 | 0,0012807 |
| ENSG00000176371 | ZSCAN2   | 15 | 84600986  | 84627796  | protein_coding | 5,97 | 0,0000000 |
| ENSG00000186153 | WVOX     | 16 | 78099413  | 79212667  | protein_coding | 5,96 | 0,0075075 |
| ENSG00000163864 | NMNAT3   | 3  | 139560180 | 139678017 | protein_coding | 5,95 | 0,0000000 |
| ENSG00000261115 | TMEM178B | 7  | 141074232 | 141480380 | protein_coding | 5,95 | 0,0012807 |
| ENSG00000185947 | ZNF267   | 16 | 31873758  | 31917357  | protein_coding | 5,94 | 0,0000000 |
| ENSG00000111145 | ELK3     | 12 | 96194382  | 96269835  | protein_coding | 5,94 | 0,0012807 |
| ENSG00000149050 | ZNF214   | 11 | 6999318   | 7020368   | protein_coding | 5,93 | 0,0000000 |
| ENSG00000186777 | ZNF732   | 4  | 270675    | 305321    | protein_coding | 5,92 | 0,0000000 |
| ENSG00000184349 | EFNA5    | 5  | 107376889 | 107670895 | protein_coding | 5,91 | 0,0037996 |
| ENSG00000165471 | MBL2     | 10 | 52765380  | 52771700  | protein_coding | 5,90 | 0,6142622 |
| ENSG00000166897 | ELFN2    | 22 | 37367960  | 37427470  | protein_coding | 5,89 | 0,0793786 |

|                 |          |    |           |           |                |      |           |
|-----------------|----------|----|-----------|-----------|----------------|------|-----------|
| ENSG00000100253 | MIOX     | 22 | 50486784  | 50490648  | protein_coding | 5,88 | 0,0793786 |
| ENSG00000196653 | ZNF502   | 3  | 44712643  | 44723831  | protein_coding | 5,86 | 0,0012807 |
| ENSG00000130176 | CNN1     | 19 | 11538717  | 11550323  | protein_coding | 5,85 | 0,0012807 |
| ENSG00000136928 | GABBR2   | 9  | 98288082  | 98709197  | protein_coding | 5,84 | 0,0006696 |
| ENSG00000174371 | EXO1     | 1  | 241847967 | 241895148 | protein_coding | 5,84 | 0,0050271 |
| ENSG00000104848 | KCNA7    | 19 | 49067418  | 49072941  | protein_coding | 5,83 | 0,0793786 |
| ENSG00000164989 | CCDC171  | 9  | 15552897  | 16061663  | protein_coding | 5,83 | 0,0111464 |
| ENSG00000187268 | FAM9C    | X  | 13035618  | 13044682  | protein_coding | 5,81 | 0,0012807 |
| ENSG00000130545 | CRB3     | 19 | 6463777   | 6467221   | protein_coding | 5,80 | 0,0418702 |
| ENSG00000214216 | IQCJ     | 3  | 158962928 | 159266307 | protein_coding | 5,80 | 0,0111464 |
| ENSG00000003147 | ICA1     | 7  | 8113184   | 8262687   | protein_coding | 5,80 | 0,0012807 |
| ENSG00000184992 | BRI3BP   | 12 | 124993700 | 125031231 | protein_coding | 5,79 | 0,0000000 |
| ENSG00000151500 | THYN1    | 11 | 134248279 | 134253370 | protein_coding | 5,77 | 0,0012807 |
| ENSG00000214456 | PLIN5    | 19 | 4522531   | 4535224   | protein_coding | 5,77 | 0,3963183 |
| ENSG00000078246 | TULP3    | 12 | 2877223   | 2941140   | protein_coding | 5,77 | 0,0000000 |
| ENSG00000124143 | ARHGAP40 | 20 | 38601934  | 38651035  | protein_coding | 5,77 | 0,0062591 |
| ENSG00000077514 | POLD3    | 11 | 74493851  | 74669117  | protein_coding | 5,76 | 0,0012807 |
| ENSG00000163507 | KIAA1524 | 3  | 108549869 | 108589644 | protein_coding | 5,76 | 0,1168222 |
| ENSG00000167553 | TUBA1C   | 12 | 49188736  | 49274603  | protein_coding | 5,74 | 0,0012807 |
| ENSG00000119147 | C2orf40  | 2  | 106063246 | 106078159 | protein_coding | 5,73 | 0,0184474 |
| ENSG00000213123 | TCTEX1D2 | 3  | 196291219 | 196318299 | protein_coding | 5,72 | 0,0586426 |
| ENSG00000183960 | KCNH8    | 3  | 19148454  | 19535646  | protein_coding | 5,71 | 0,0012807 |
| ENSG00000100601 | ALKBH1   | 14 | 77672404  | 77708020  | protein_coding | 5,70 | 0,0000000 |
| ENSG00000198208 | RPS6KL1  | 14 | 74903954  | 74923396  | protein_coding | 5,68 | 0,0025348 |
| ENSG00000078081 | LAMP3    | 3  | 183122213 | 183163839 | protein_coding | 5,68 | 0,0012807 |
| ENSG00000137804 | NUSAP1   | 15 | 41332694  | 41381050  | protein_coding | 5,67 | 0,0000000 |
| ENSG00000119969 | HELLS    | 10 | 94501434  | 94613905  | protein_coding | 5,66 | 0,0000000 |
| ENSG00000114124 | GRK7     | 3  | 141778148 | 141818490 | protein_coding | 5,66 | 0,0793786 |
| ENSG00000120210 | INSL6    | 9  | 5131979   | 5185668   | protein_coding | 5,64 | 0,0995111 |
| ENSG00000113430 | IRX4     | 5  | 1877413   | 1887236   | protein_coding | 5,64 | 0,0184474 |
| ENSG00000221866 | PLXNA4   | 7  | 132123332 | 132648688 | protein_coding | 5,64 | 0,0111464 |
| ENSG00000178404 | CEP295NL | 17 | 78870910  | 78903217  | protein_coding | 5,63 | 0,0335607 |
| ENSG00000104626 | ERI1     | 8  | 9002147   | 9116746   | protein_coding | 5,63 | 0,0012807 |
| ENSG00000137962 | ARHGAP29 | 1  | 94148988  | 94275068  | protein_coding | 5,62 | 0,0300092 |
| ENSG00000152359 | POC5     | 5  | 75674124  | 75717481  | protein_coding | 5,62 | 0,0000000 |
| ENSG00000125144 | MT1G     | 16 | 56666731  | 56668065  | protein_coding | 5,62 | 0,0300092 |
| ENSG00000166153 | DEPDC4   | 12 | 100203669 | 100267079 | protein_coding | 5,61 | 0,0012807 |
| ENSG00000182606 | TRAK1    | 3  | 42013802  | 42225889  | protein_coding | 5,60 | 0,0000000 |
| ENSG00000069248 | NUP133   | 1  | 229440260 | 229508341 | protein_coding | 5,60 | 0,0012807 |
| ENSG00000106536 | POU6F2   | 7  | 38977998  | 39493095  | protein_coding | 5,59 | 0,0335607 |
| ENSG00000124226 | RNF114   | 20 | 49936336  | 49953892  | protein_coding | 5,58 | 0,0000000 |
| ENSG00000167034 | NKX3-1   | 8  | 23678693  | 23682927  | protein_coding | 5,58 | 0,0148097 |
| ENSG00000266265 | KLF14    | 7  | 130731235 | 130734061 | protein_coding | 5,57 | 0,0025348 |
| ENSG00000144152 | FBLN7    | 2  | 112138385 | 112188216 | protein_coding | 5,57 | 0,0025348 |
| ENSG00000186976 | EFCAB6   | 22 | 43528744  | 43812337  | protein_coding | 5,56 | 0,0006696 |
| ENSG00000122507 | BBS9     | 7  | 33129244  | 33606068  | protein_coding | 5,55 | 0,0012807 |
| ENSG00000117595 | IRF6     | 1  | 209785623 | 209806175 | protein_coding | 5,55 | 0,0000000 |
| ENSG00000168297 | PXK      | 3  | 58332880  | 58426126  | protein_coding | 5,55 | 0,0793786 |
| ENSG00000160282 | FTCD     | 21 | 46136262  | 46155567  | protein_coding | 5,54 | 0,0538744 |
| ENSG00000084453 | SLCO1A2  | 12 | 21264600  | 21419594  | protein_coding | 5,54 | 0,0037996 |
| ENSG00000129028 | THAP10   | 15 | 70881342  | 70892785  | protein_coding | 5,53 | 0,0000000 |
| ENSG00000177042 | TMEM80   | 11 | 695428    | 705028    | protein_coding | 5,53 | 0,0006696 |
| ENSG00000158480 | SPATA2   | 20 | 49903391  | 49915508  | protein_coding | 5,52 | 0,0000000 |
| ENSG00000111845 | PAK1IP1  | 6  | 10694695  | 10709782  | protein_coding | 5,51 | 0,0025348 |
| ENSG00000155849 | ELMO1    | 7  | 36854361  | 37449249  | protein_coding | 5,51 | 0,0000000 |

|                 |          |    |           |           |                |      |           |
|-----------------|----------|----|-----------|-----------|----------------|------|-----------|
| ENSG00000181963 | OR52K2   | 11 | 4449295   | 4450361   | protein_coding | 5,50 | 0,1245284 |
| ENSG00000140386 | SCAPER   | 15 | 76347904  | 76905444  | protein_coding | 5,49 | 0,0062591 |
| ENSG00000132554 | RGS22    | 8  | 99960936  | 100131268 | protein_coding | 5,49 | 0,0075075 |
| ENSG00000120696 | KBTBD7   | 13 | 41189833  | 41194566  | protein_coding | 5,46 | 0,0000000 |
| ENSG00000167797 | CDK2AP2  | 11 | 67506497  | 67508649  | protein_coding | 5,46 | 0,0000000 |
| ENSG00000140297 | GCNT3    | 15 | 59594875  | 59640239  | protein_coding | 5,46 | 0,0025348 |
| ENSG00000076554 | TPD52    | 8  | 80034745  | 80231232  | protein_coding | 5,45 | 0,0172684 |
| ENSG00000188312 | CENPP    | 9  | 92325484  | 92620533  | protein_coding | 5,45 | 0,0012807 |
| ENSG00000115232 | ITGA4    | 2  | 181457202 | 181536187 | protein_coding | 5,45 | 0,0012807 |
| ENSG00000122966 | CIT      | 12 | 119685790 | 119877291 | protein_coding | 5,44 | 0,0000000 |
| ENSG00000135211 | TMEM60   | 7  | 77793728  | 77798580  | protein_coding | 5,44 | 0,0037996 |
| ENSG00000113396 | SLC27A6  | 5  | 128538013 | 129033642 | protein_coding | 5,44 | 0,0000000 |
| ENSG00000151623 | NR3C2    | 4  | 148078762 | 148444698 | protein_coding | 5,43 | 0,0012807 |
| ENSG00000088305 | DNMT3B   | 20 | 32762385  | 32809356  | protein_coding | 5,43 | 0,0000000 |
| ENSG00000159079 | C21orf59 | 21 | 32592079  | 32612866  | protein_coding | 5,42 | 0,0050271 |
| ENSG00000131941 | RHPN2    | 19 | 32978593  | 33064888  | protein_coding | 5,42 | 0,0012807 |
| ENSG00000180767 | CHST13   | 3  | 126524283 | 126543291 | protein_coding | 5,41 | 0,0148097 |
| ENSG00000197275 | RAD54B   | 8  | 94371960  | 94475109  | protein_coding | 5,41 | 0,0012807 |
| ENSG00000143106 | PSMA5    | 1  | 109399031 | 109426427 | protein_coding | 5,40 | 0,0012807 |
| ENSG00000104044 | OCA2     | 15 | 27754875  | 28099358  | protein_coding | 5,39 | 0,0012807 |
| ENSG00000140527 | WDR93    | 15 | 89690797  | 89743638  | protein_coding | 5,39 | 0,5364729 |
| ENSG00000196071 | OR2L13   | 1  | 247937191 | 248100922 | protein_coding | 5,39 | 0,0148097 |
| ENSG00000163793 | DNAJC5G  | 2  | 27275421  | 27281499  | protein_coding | 5,38 | 0,0148097 |
| ENSG00000187288 | CIDEC    | 3  | 9866711   | 9880254   | protein_coding | 5,35 | 0,2600087 |
| ENSG00000168263 | KCNV2    | 9  | 2717502   | 2730037   | protein_coding | 5,34 | 0,0586426 |
| ENSG00000104611 | SH2D4A   | 8  | 19313617  | 19396218  | protein_coding | 5,34 | 0,0000000 |
| ENSG00000185736 | ADARB2   | 10 | 1177318   | 1737476   | protein_coding | 5,33 | 0,2127456 |
| ENSG00000184838 | PRR16    | 5  | 120464278 | 120687332 | protein_coding | 5,33 | 0,0012807 |
| ENSG00000081479 | LRP2     | 2  | 169127109 | 169362685 | protein_coding | 5,33 | 0,1245284 |
| ENSG00000161381 | PLXDC1   | 17 | 39063303  | 39154394  | protein_coding | 5,32 | 0,0025348 |
| ENSG00000131437 | KIF3A    | 5  | 132692628 | 132737638 | protein_coding | 5,32 | 0,0025348 |
| ENSG00000114854 | TNNC1    | 3  | 52451102  | 52454070  | protein_coding | 5,30 | 0,0418702 |
| ENSG00000159173 | TNNI1    | 1  | 201403768 | 201429866 | protein_coding | 5,30 | 0,1245284 |
| ENSG00000273274 | ZBTB8B   | 1  | 32465069  | 32496686  | protein_coding | 5,29 | 0,0012807 |
| ENSG00000180611 | MB21D2   | 3  | 192796815 | 192918161 | protein_coding | 5,28 | 0,0012807 |
| ENSG00000118193 | KIF14    | 1  | 200551497 | 200620734 | protein_coding | 5,27 | 0,0012807 |
| ENSG00000036530 | CYP46A1  | 14 | 99684304  | 99727301  | protein_coding | 5,26 | 0,0012807 |
| ENSG00000187726 | DNAJB13  | 11 | 73950319  | 73970366  | protein_coding | 5,26 | 0,0050271 |
| ENSG00000166407 | LMO1     | 11 | 8224304   | 8268716   | protein_coding | 5,26 | 0,0012807 |
| ENSG00000095002 | MSH2     | 2  | 47402969  | 47562311  | protein_coding | 5,25 | 0,0000000 |
| ENSG00000185798 | WDR53    | 3  | 196554177 | 196568674 | protein_coding | 5,24 | 0,0012807 |
| ENSG00000129993 | CBFA2T3  | 16 | 88874858  | 88977204  | protein_coding | 5,24 | 0,0418702 |
| ENSG00000198650 | TAT      | 16 | 71565660  | 71577130  | protein_coding | 5,24 | 0,0037996 |
| ENSG00000178568 | ERBB4    | 2  | 211375717 | 212538841 | protein_coding | 5,23 | 0,0000000 |
| ENSG00000146263 | MMS22L   | 6  | 97142161  | 97283217  | protein_coding | 5,23 | 0,0000000 |
| ENSG00000135040 | NAA35    | 9  | 85941146  | 86022298  | protein_coding | 5,22 | 0,0012807 |
| ENSG00000131018 | SYNE1    | 6  | 152121684 | 152637801 | protein_coding | 5,20 | 0,0000000 |
| ENSG00000165097 | KDM1B    | 6  | 18155329  | 18223853  | protein_coding | 5,18 | 0,0012807 |
| ENSG00000175344 | CHRNA7   | 15 | 32030488  | 32172521  | protein_coding | 5,18 | 0,0012807 |
| ENSG00000213066 | FGFR1OP  | 6  | 166999182 | 167052713 | protein_coding | 5,17 | 0,0012807 |
| ENSG00000100351 | GRAP2    | 22 | 39901082  | 39973721  | protein_coding | 5,14 | 0,2725752 |
| ENSG00000136842 | TMOD1    | 9  | 97501180  | 97601748  | protein_coding | 5,11 | 0,0012807 |
| ENSG00000143633 | C1orf131 | 1  | 231223763 | 231241187 | protein_coding | 5,11 | 0,0012807 |
| ENSG00000167703 | SLC43A2  | 17 | 1569267   | 1628886   | protein_coding | 5,11 | 0,0012807 |
| ENSG00000197006 | METTL9   | 16 | 21597218  | 21657473  | protein_coding | 5,10 | 0,0012807 |

|                 |          |    |           |           |                |      |           |
|-----------------|----------|----|-----------|-----------|----------------|------|-----------|
| ENSG00000104442 | ARMC1    | 8  | 65602456  | 65634217  | protein_coding | 5,10 | 0,0000000 |
| ENSG00000196169 | KIF19    | 17 | 74326210  | 74355820  | protein_coding | 5,10 | 0,1245284 |
| ENSG00000214215 | C12orf74 | 12 | 92702843  | 92708549  | protein_coding | 5,10 | 0,0418702 |
| ENSG00000188958 | UTS2B    | 3  | 191267168 | 191330536 | protein_coding | 5,10 | 0,2229774 |
| ENSG00000129221 | AIPL1    | 17 | 6393693   | 6435199   | protein_coding | 5,09 | 0,0717418 |
| ENSG00000120656 | TAF12    | 1  | 28589323  | 28643085  | protein_coding | 5,09 | 0,0000000 |
| ENSG00000077063 | CTTNBP2  | 7  | 117710651 | 117874139 | protein_coding | 5,09 | 0,0012807 |
| ENSG00000123737 | EXOSC9   | 4  | 121801317 | 121817021 | protein_coding | 5,09 | 0,0012807 |
| ENSG00000146243 | IRAK1BP1 | 6  | 78867472  | 78946440  | protein_coding | 5,07 | 0,0000000 |
| ENSG00000198924 | DCLRE1A  | 10 | 113834725 | 113854383 | protein_coding | 5,07 | 0,0995111 |
| ENSG00000111834 | RSPH4A   | 6  | 116616479 | 116632985 | protein_coding | 5,06 | 0,0012807 |
| ENSG00000077585 | GPR137B  | 1  | 236142505 | 236221865 | protein_coding | 5,06 | 0,0000000 |
| ENSG00000128340 | RAC2     | 22 | 37225261  | 37244448  | protein_coding | 5,06 | 0,0012807 |
| ENSG00000170965 | PLAC1    | X  | 134565838 | 134764322 | protein_coding | 5,05 | 0,0012807 |
| ENSG00000037042 | TUBG2    | 17 | 42659305  | 42667006  | protein_coding | 5,05 | 0,0000000 |
| ENSG00000125319 | C17orf53 | 17 | 44141906  | 44162476  | protein_coding | 5,05 | 0,0012807 |
| ENSG00000074319 | TSG101   | 11 | 18468336  | 18527232  | protein_coding | 5,04 | 0,0006696 |
| ENSG00000105143 | SLC1A6   | 19 | 14950034  | 15022990  | protein_coding | 5,04 | 0,0012807 |
| ENSG00000075914 | EXOSC7   | 3  | 44975241  | 45036066  | protein_coding | 5,04 | 0,0000000 |
| ENSG00000106399 | RPA3     | 7  | 7636518   | 7718607   | protein_coding | 5,02 | 0,0335607 |
| ENSG00000173681 | CXorf23  | X  | 19912860  | 19970298  | protein_coding | 5,00 | 0,0012807 |
| ENSG00000175318 | GRAMD2   | 15 | 72159807  | 72197785  | protein_coding | 5,00 | 0,0105771 |
| ENSG00000181609 | OR52D1   | 11 | 5488685   | 5489749   | protein_coding | 5,00 | 0,1245284 |
| ENSG00000148426 | PROSER2  | 10 | 11823339  | 11872277  | protein_coding | 4,99 | 0,0184474 |
| ENSG00000112118 | MCM3     | 6  | 52264009  | 52284881  | protein_coding | 4,98 | 0,0335607 |
| ENSG00000185989 | RASA3    | 13 | 113977783 | 114132611 | protein_coding | 4,98 | 0,0000000 |
| ENSG00000139220 | PPFIA2   | 12 | 81257975  | 81759553  | protein_coding | 4,98 | 0,0012807 |
| ENSG00000148925 | BTBD10   | 11 | 13388001  | 13463297  | protein_coding | 4,97 | 0,0012807 |
| ENSG00000138433 | CIR1     | 2  | 174348022 | 174395715 | protein_coding | 4,97 | 0,1867869 |
| ENSG00000105784 | RUNDC3B  | 7  | 87627548  | 87832296  | protein_coding | 4,96 | 0,0075075 |
| ENSG00000139915 | MDGA2    | 14 | 46839629  | 47674954  | protein_coding | 4,95 | 0,0012807 |
| ENSG00000171094 | ALK      | 2  | 29192774  | 29921566  | protein_coding | 4,95 | 0,0148097 |
| ENSG00000170448 | NFXL1    | 4  | 47847233  | 47914667  | protein_coding | 4,93 | 0,0012807 |
| ENSG00000188738 | FSIP2    | 2  | 185738628 | 185833290 | protein_coding | 4,92 | 0,0586426 |
| ENSG00000169914 | OTUD3    | 1  | 19882513  | 19912945  | protein_coding | 4,92 | 0,0000000 |
| ENSG00000133398 | MED10    | 5  | 6371881   | 6378594   | protein_coding | 4,91 | 0,0012807 |
| ENSG00000185087 | FAM169B  | 15 | 98437162  | 98514382  | protein_coding | 4,90 | 0,0025348 |
| ENSG00000152944 | MED21    | 12 | 27022546  | 27066343  | protein_coding | 4,89 | 0,0793786 |
| ENSG00000158023 | WDR66    | 12 | 121917862 | 122003927 | protein_coding | 4,88 | 0,0012807 |
| ENSG00000258986 | TMEM179  | 14 | 104474678 | 104605647 | protein_coding | 4,88 | 0,0184474 |
| ENSG00000099958 | DERL3    | 22 | 23834503  | 23839128  | protein_coding | 4,88 | 0,0012807 |
| ENSG00000132436 | FIGNL1   | 7  | 50444128  | 50542535  | protein_coding | 4,88 | 0,0012807 |
| ENSG00000170390 | DCLK2    | 4  | 150078274 | 150257457 | protein_coding | 4,87 | 0,0012807 |
| ENSG00000148660 | CAMK2G   | 10 | 73812501  | 73874591  | protein_coding | 4,87 | 0,0335607 |
| ENSG00000143001 | TMEM61   | 1  | 54980792  | 54992293  | protein_coding | 4,87 | 0,0335607 |
| ENSG00000145757 | SPATA9   | 5  | 95652181  | 95698711  | protein_coding | 4,86 | 0,0025348 |
| ENSG00000033867 | SLC4A7   | 3  | 27372721  | 27484420  | protein_coding | 4,86 | 0,0025348 |
| ENSG00000213186 | TRIM59   | 3  | 160432445 | 160485773 | protein_coding | 4,85 | 0,0793786 |
| ENSG00000112167 | SAYSD1   | 6  | 39104064  | 39115189  | protein_coding | 4,84 | 0,0006696 |
| ENSG00000070718 | AP3M2    | 8  | 42152946  | 42171673  | protein_coding | 4,81 | 0,0012807 |
| ENSG00000121898 | CPXM2    | 10 | 123706207 | 123940267 | protein_coding | 4,81 | 0,0184474 |
| ENSG00000179930 | ZNF648   | 1  | 182054570 | 182061712 | protein_coding | 4,80 | 0,6142622 |
| ENSG00000198729 | PPP1R14C | 6  | 150143076 | 150250357 | protein_coding | 4,79 | 0,0012807 |
| ENSG00000187098 | MITF     | 3  | 69739435  | 69968337  | protein_coding | 4,78 | 0,0012807 |
| ENSG00000196466 | ZNF799   | 19 | 12390016  | 12401271  | protein_coding | 4,78 | 0,0012807 |

|                 |          |    |           |           |                |      |           |
|-----------------|----------|----|-----------|-----------|----------------|------|-----------|
| ENSG00000149418 | ST14     | 11 | 130159562 | 130210376 | protein_coding | 4,78 | 0,0184474 |
| ENSG00000165181 | C9orf84  | 9  | 111686173 | 111795008 | protein_coding | 4,77 | 0,2725752 |
| ENSG00000105865 | DUS4L    | 7  | 107563484 | 107578464 | protein_coding | 4,77 | 0,0000000 |
| ENSG00000145781 | COMMD10  | 5  | 116084991 | 116412762 | protein_coding | 4,76 | 0,0418702 |
| ENSG00000260314 | MRC1     | 10 | 17809344  | 17911170  | protein_coding | 4,75 | 0,0012807 |
| ENSG00000129235 | TXNDC17  | 17 | 6640758   | 6644541   | protein_coding | 4,75 | 0,0050271 |
| ENSG00000173698 | ADGRG2   | X  | 18989309  | 19122637  | protein_coding | 4,74 | 0,0006696 |
| ENSG00000135540 | NHSL1    | 6  | 138422043 | 138692571 | protein_coding | 4,71 | 0,0000000 |
| ENSG00000059588 | TARBP1   | 1  | 234391313 | 234479103 | protein_coding | 4,71 | 0,0050271 |
| ENSG00000136011 | STAB2    | 12 | 103587273 | 103766727 | protein_coding | 4,70 | 0,0012807 |
| ENSG00000132780 | NASP     | 1  | 45583846  | 45618904  | protein_coding | 4,70 | 0,0000000 |
| ENSG00000170584 | NUDCD2   | 5  | 163446526 | 163460140 | protein_coding | 4,69 | 0,0012807 |
| ENSG00000100479 | POLE2    | 14 | 49643555  | 49688422  | protein_coding | 4,69 | 0,0609506 |
| ENSG00000170807 | LMOD2    | 7  | 123655807 | 123664290 | protein_coding | 4,68 | 0,3785161 |
| ENSG00000131944 | FAAP24   | 19 | 32972209  | 32978222  | protein_coding | 4,67 | 0,1488645 |
| ENSG00000188385 | JAKMIP3  | 10 | 132104671 | 132184809 | protein_coding | 4,66 | 0,0037996 |
| ENSG00000132874 | SLC14A2  | 18 | 45212995  | 45683686  | protein_coding | 4,66 | 0,0012807 |
| ENSG00000041353 | RAB27B   | 18 | 54717860  | 54895516  | protein_coding | 4,65 | 0,0012807 |
| ENSG00000172209 | GPR22    | 7  | 107470018 | 107475659 | protein_coding | 4,64 | 0,0184474 |
| ENSG00000151332 | MBIP     | 14 | 36298558  | 36320676  | protein_coding | 4,63 | 0,0012807 |
| ENSG00000172687 | ZNF738   | 19 | 21358930  | 21379302  | protein_coding | 4,62 | 0,0012807 |
| ENSG00000214189 | ZNF788   | 19 | 12092263  | 12137235  | protein_coding | 4,60 | 0,0050271 |
| ENSG00000134049 | IER3IP1  | 18 | 47152998  | 47176374  | protein_coding | 4,59 | 0,1245284 |
| ENSG00000177459 | ERICH5   | 8  | 98064311  | 98093610  | protein_coding | 4,58 | 0,0000000 |
| ENSG00000188613 | NANOS1   | 10 | 119029716 | 119033732 | protein_coding | 4,57 | 0,0012807 |
| ENSG00000072952 | MRVI1    | 11 | 10573091  | 10693988  | protein_coding | 4,57 | 0,0006696 |
| ENSG00000160813 | PPP1R35  | 7  | 100435282 | 100436565 | protein_coding | 4,57 | 0,0012807 |
| ENSG00000165929 | TC2N     | 14 | 91779751  | 91867536  | protein_coding | 4,57 | 0,0006696 |
| ENSG00000182004 | SNRPE    | 1  | 203861603 | 203870550 | protein_coding | 4,57 | 0,0257457 |
| ENSG00000101003 | GINS1    | 20 | 25407727  | 25452628  | protein_coding | 4,55 | 0,0012807 |
| ENSG00000156831 | NSMCE2   | 8  | 125091679 | 125367120 | protein_coding | 4,54 | 0,0062591 |
| ENSG00000134758 | RNF138   | 18 | 32091855  | 32131561  | protein_coding | 4,53 | 0,2127456 |
| ENSG00000186625 | KATNA1   | 6  | 149594873 | 149648972 | protein_coding | 4,53 | 0,0012807 |
| ENSG00000143375 | CGN      | 1  | 151510510 | 151538692 | protein_coding | 4,53 | 0,0012807 |
| ENSG00000203965 | EFCAB7   | 1  | 63523372  | 63572693  | protein_coding | 4,52 | 0,6142622 |
| ENSG00000135045 | C9orf40  | 9  | 74946581  | 74952886  | protein_coding | 4,52 | 0,0050271 |
| ENSG00000106034 | CPED1    | 7  | 120988677 | 121297444 | protein_coding | 4,52 | 0,0000000 |
| ENSG00000109452 | INPP4B   | 4  | 142023160 | 142847432 | protein_coding | 4,51 | 0,0012807 |
| ENSG00000113734 | BNIP1    | 5  | 173144442 | 173164387 | protein_coding | 4,51 | 0,0000000 |
| ENSG00000120156 | TEK      | 9  | 27109141  | 27230175  | protein_coding | 4,51 | 0,0012807 |
| ENSG00000166266 | CUL5     | 11 | 108008733 | 108107776 | protein_coding | 4,51 | 0,0000000 |
| ENSG00000175779 | C15orf53 | 15 | 38696598  | 38700038  | protein_coding | 4,50 | 0,6142622 |
| ENSG00000179088 | C12orf42 | 12 | 103237591 | 103496010 | protein_coding | 4,50 | 0,0111464 |
| ENSG00000146013 | GFRA3    | 5  | 138252379 | 138274671 | protein_coding | 4,50 | 0,0006696 |
| ENSG00000071243 | ING3     | 7  | 120950749 | 120977216 | protein_coding | 4,50 | 0,0793786 |
| ENSG00000147905 | ZCCHC7   | 9  | 37120539  | 37358149  | protein_coding | 4,49 | 0,0335607 |
| ENSG00000242950 | ERVW-1   | 7  | 92468380  | 92477986  | protein_coding | 4,49 | 0,0075075 |
| ENSG00000205111 | CDKL4    | 2  | 39175646  | 39229588  | protein_coding | 4,48 | 0,0075075 |
| ENSG00000149636 | DSN1     | 20 | 36751791  | 36773818  | protein_coding | 4,48 | 0,4999662 |
| ENSG00000140284 | SLC27A2  | 15 | 50182196  | 50236395  | protein_coding | 4,47 | 0,0012807 |
| ENSG00000154277 | UCHL1    | 4  | 41256413  | 41268455  | protein_coding | 4,47 | 0,0257457 |
| ENSG00000101811 | CSTF2    | X  | 100820359 | 100840932 | protein_coding | 4,47 | 0,0000000 |
| ENSG00000051596 | THOC3    | 5  | 175917873 | 176034680 | protein_coding | 4,46 | 0,0006696 |
| ENSG00000107833 | NPM3     | 10 | 101781325 | 101783413 | protein_coding | 4,45 | 0,0037996 |
| ENSG00000177138 | FAM9B    | X  | 9024232   | 9164639   | protein_coding | 4,44 | 0,0335607 |

|                 |            |    |           |           |                |      |           |
|-----------------|------------|----|-----------|-----------|----------------|------|-----------|
| ENSG00000163166 | IWS1       | 2  | 127436207 | 127526886 | protein_coding | 4,44 | 0,1598647 |
| ENSG00000136824 | SMC2       | 9  | 104094260 | 104141417 | protein_coding | 4,44 | 0,0050271 |
| ENSG00000120533 | ENY2       | 8  | 109334324 | 109345953 | protein_coding | 4,43 | 0,0111464 |
| ENSG00000055609 | KMT2C      | 7  | 152134922 | 152436005 | protein_coding | 4,43 | 0,0012807 |
| ENSG00000083635 | NUFIP1     | 13 | 44939249  | 44989483  | protein_coding | 4,43 | 0,0062591 |
| ENSG00000115252 | PDE1A      | 2  | 182140036 | 182523192 | protein_coding | 4,42 | 0,0000000 |
| ENSG00000116525 | TRIM62     | 1  | 33145402  | 33182059  | protein_coding | 4,42 | 0,0000000 |
| ENSG00000183527 | PSMG1      | 21 | 39174769  | 39183851  | protein_coding | 4,42 | 0,0012807 |
| ENSG00000088325 | TPX2       | 20 | 31739271  | 31801805  | protein_coding | 4,40 | 0,0000000 |
| ENSG00000054796 | SPO11      | 20 | 57329759  | 57343994  | protein_coding | 4,40 | 0,0418702 |
| ENSG00000088256 | GNA11      | 19 | 3094410   | 3124004   | protein_coding | 4,39 | 0,3963183 |
| ENSG00000257093 | KIAA1147   | 7  | 141656728 | 141702153 | protein_coding | 4,39 | 0,0000000 |
| ENSG00000272886 | DCP1A      | 3  | 53283428  | 53347610  | protein_coding | 4,38 | 0,0000000 |
| ENSG00000172817 | CYP7B1     | 8  | 64587763  | 64798761  | protein_coding | 4,38 | 0,0105771 |
| ENSG00000106686 | SPATA6L    | 9  | 4553386   | 4666674   | protein_coding | 4,38 | 0,0012807 |
| ENSG00000135334 | AKIRIN2    | 6  | 87675072  | 87702209  | protein_coding | 4,38 | 0,0037996 |
| ENSG00000166529 | ZSCAN21    | 7  | 100049774 | 100065038 | protein_coding | 4,38 | 0,0000000 |
| ENSG00000248710 | ENSG000000 | 3  | 160227454 | 160449829 | protein_coding | 4,38 | 0,6142622 |
| ENSG00000120306 | CYSTM1     | 5  | 140174642 | 140282052 | protein_coding | 4,37 | 0,0000000 |
| ENSG00000166851 | PLK1       | 16 | 23677656  | 23690367  | protein_coding | 4,37 | 0,0148097 |
| ENSG00000111554 | MDM1       | 12 | 68272443  | 68332381  | protein_coding | 4,36 | 0,0012807 |
| ENSG00000137393 | RNF144B    | 6  | 18387350  | 18468874  | protein_coding | 4,36 | 0,0012807 |
| ENSG00000196876 | SCN8A      | 12 | 51590266  | 51812864  | protein_coding | 4,35 | 0,0012807 |
| ENSG00000115705 | TPO        | 2  | 1374223   | 1543711   | protein_coding | 4,34 | 0,0717418 |
| ENSG00000135094 | SDS        | 12 | 113392445 | 113426301 | protein_coding | 4,33 | 0,0012807 |
| ENSG00000169379 | ARL13B     | 3  | 93980139  | 94055668  | protein_coding | 4,32 | 0,0025348 |
| ENSG00000172530 | BANP       | 16 | 87949244  | 88118422  | protein_coding | 4,32 | 0,0257457 |
| ENSG00000135205 | CCDC146    | 7  | 77122434  | 77329533  | protein_coding | 4,32 | 0,0538744 |
| ENSG00000058729 | RIOK2      | 5  | 97160867  | 97183260  | protein_coding | 4,30 | 0,0025348 |
| ENSG00000168907 | PLA2G4F    | 15 | 42139034  | 42156636  | protein_coding | 4,30 | 0,0111464 |
| ENSG00000235711 | ANKRD34C   | 15 | 79293285  | 79298235  | protein_coding | 4,30 | 0,0012807 |
| ENSG00000162456 | KNCN       | 1  | 46545644  | 46551527  | protein_coding | 4,30 | 0,0418702 |
| ENSG00000099715 | PCDH11Y    | X  | 5000226   | 5742224   | protein_coding | 4,30 | 0,0012807 |
| ENSG00000147003 | TMEM27     | X  | 15627318  | 15665031  | protein_coding | 4,29 | 0,0793786 |
| ENSG00000197128 | ZNF772     | 19 | 57466663  | 57477570  | protein_coding | 4,28 | 0,0012807 |
| ENSG00000095777 | MYO3A      | 10 | 25934267  | 26212527  | protein_coding | 4,27 | 0,2229774 |
| ENSG00000112759 | SLC29A1    | 6  | 44219505  | 44234151  | protein_coding | 4,27 | 0,0012807 |
| ENSG00000174473 | GALNTL6    | 4  | 171812254 | 173041559 | protein_coding | 4,26 | 0,0717418 |
| ENSG00000173065 | FAM222B    | 17 | 28755978  | 28855232  | protein_coding | 4,26 | 0,0012807 |
| ENSG00000086967 | MYBPC2     | 19 | 50432903  | 50466321  | protein_coding | 4,25 | 0,0148097 |
| ENSG00000112379 | ARFGEF3    | 6  | 138161921 | 138344663 | protein_coding | 4,24 | 0,0172684 |
| ENSG00000132383 | RPA1       | 17 | 1829702   | 1900082   | protein_coding | 4,24 | 0,0006696 |
| ENSG00000154783 | FGD5       | 3  | 14818962  | 14934565  | protein_coding | 4,23 | 0,0075075 |
| ENSG00000011083 | SLC6A7     | 5  | 150189957 | 150222788 | protein_coding | 4,23 | 0,1245284 |
| ENSG00000116741 | RGS2       | 1  | 192809039 | 192812283 | protein_coding | 4,22 | 0,0012807 |
| ENSG00000174667 | OR7D4      | 19 | 9213850   | 9214871   | protein_coding | 4,20 | 0,0418702 |
| ENSG00000176239 | OR51B6     | 11 | 5351508   | 5352446   | protein_coding | 4,20 | 0,1245284 |
| ENSG00000182674 | KCNB2      | 8  | 72537391  | 72938349  | protein_coding | 4,20 | 0,0111464 |
| ENSG00000278705 | HIST1H4B   | 6  | 26026815  | 26027252  | protein_coding | 4,20 | 0,0418702 |
| ENSG00000104327 | CALB1      | 8  | 90058608  | 90095475  | protein_coding | 4,20 | 0,0335607 |
| ENSG00000137692 | DCUN1D5    | 11 | 103062076 | 103092215 | protein_coding | 4,19 | 0,0062591 |
| ENSG00000175097 | RAG2       | 11 | 36575574  | 36598279  | protein_coding | 4,19 | 0,0025348 |
| ENSG00000163012 | ZSWIM2     | 2  | 186827835 | 186849208 | protein_coding | 4,18 | 0,0184474 |
| ENSG00000078401 | EDN1       | 6  | 12290363  | 12297194  | protein_coding | 4,18 | 0,0184474 |
| ENSG00000149308 | NPAT       | 11 | 108157215 | 108222642 | protein_coding | 4,18 | 0,1245284 |

|                 |             |    |           |           |                |      |           |
|-----------------|-------------|----|-----------|-----------|----------------|------|-----------|
| ENSG0000028839  | TBPL1       | 6  | 133952170 | 133990432 | protein_coding | 4,17 | 0,0012807 |
| ENSG00000183569 | SERHL2      | 22 | 42553617  | 42574382  | protein_coding | 4,16 | 0,0012807 |
| ENSG00000032389 | TSSC1       | 2  | 3188925   | 3377882   | protein_coding | 4,16 | 0,0012807 |
| ENSG00000146267 | FAXC        | 6  | 99271169  | 99350062  | protein_coding | 4,15 | 0,0300092 |
| ENSG00000116273 | PHF13       | 1  | 6613685   | 6624033   | protein_coding | 4,15 | 0,0000000 |
| ENSG00000165643 | SOHLH1      | 9  | 135693407 | 135699528 | protein_coding | 4,15 | 0,4999662 |
| ENSG00000181378 | CCDC108     | 2  | 219002846 | 219041527 | protein_coding | 4,14 | 0,0075075 |
| ENSG00000164253 | WDR41       | 5  | 77425970  | 77620611  | protein_coding | 4,13 | 0,0148097 |
| ENSG00000174013 | FBXO45      | 3  | 196568611 | 196589059 | protein_coding | 4,13 | 0,0075075 |
| ENSG00000162607 | USP1        | 1  | 62436297  | 62451804  | protein_coding | 4,13 | 0,0012807 |
| ENSG00000105849 | TWISTNB     | 7  | 19695462  | 19709087  | protein_coding | 4,12 | 0,0075075 |
| ENSG00000267909 | CCDC177     | 14 | 69569816  | 69574837  | protein_coding | 4,12 | 0,0012807 |
| ENSG00000064652 | SNX24       | 5  | 122843439 | 123029354 | protein_coding | 4,11 | 0,0062591 |
| ENSG00000110108 | TMEM109     | 11 | 60913874  | 60923443  | protein_coding | 4,11 | 0,0000000 |
| ENSG00000163159 | VPS72       | 1  | 151169987 | 151195321 | protein_coding | 4,10 | 0,0418702 |
| ENSG00000136944 | LMX1B       | 9  | 126614443 | 126701032 | protein_coding | 4,10 | 0,0418702 |
| ENSG00000131686 | CA6         | 1  | 8945867   | 8975092   | protein_coding | 4,10 | 0,0418702 |
| ENSG00000176208 | ATAD5       | 17 | 30831970  | 30895869  | protein_coding | 4,09 | 0,0538744 |
| ENSG00000175267 | VWA3A       | 16 | 22092538  | 22156966  | protein_coding | 4,09 | 0,0012807 |
| ENSG00000158435 | CNOT11      | 2  | 101252802 | 101270316 | protein_coding | 4,09 | 0,0025348 |
| ENSG00000135100 | HNF1A       | 12 | 120978543 | 121002512 | protein_coding | 4,08 | 0,0111464 |
| ENSG00000107864 | CPEB3       | 10 | 92046692  | 92291087  | protein_coding | 4,08 | 0,0062591 |
| ENSG00000198948 | MFAP3L      | 4  | 169986597 | 170033031 | protein_coding | 4,08 | 0,0062591 |
| ENSG00000088926 | F11         | 4  | 186265945 | 186288806 | protein_coding | 4,08 | 0,0075075 |
| ENSG00000135838 | NPL         | 1  | 182789293 | 182830384 | protein_coding | 4,07 | 0,2229774 |
| ENSG00000159596 | TMEM69      | 1  | 45687214  | 45694443  | protein_coding | 4,07 | 0,0012807 |
| ENSG00000239521 | GATS        | 7  | 100200653 | 100272218 | protein_coding | 4,07 | 0,0012807 |
| ENSG00000137075 | RNF38       | 9  | 36336396  | 36487548  | protein_coding | 4,05 | 0,0012807 |
| ENSG00000163935 | SFMBT1      | 3  | 52903572  | 53046750  | protein_coding | 4,05 | 0,0012807 |
| ENSG00000152382 | TADA1       | 1  | 166856510 | 166876327 | protein_coding | 4,05 | 0,0050271 |
| ENSG00000108001 | EBF3        | 10 | 129835283 | 129963841 | protein_coding | 4,05 | 0,0184474 |
| ENSG00000176896 | TCEANC      | X  | 13653189  | 13681964  | protein_coding | 4,05 | 0,0050271 |
| ENSG00000116016 | EPAS1       | 2  | 46293667  | 46386703  | protein_coding | 4,05 | 0,0000000 |
| ENSG00000151892 | GFRA1       | 10 | 116056925 | 116273467 | protein_coding | 4,04 | 0,0111464 |
| ENSG00000166920 | C15orf48    | 15 | 45430529  | 45448761  | protein_coding | 4,04 | 0,0025348 |
| ENSG00000103942 | HOMER2      | 15 | 82836946  | 82986153  | protein_coding | 4,04 | 0,0000000 |
| ENSG00000130349 | C6orf203    | 6  | 107028213 | 107051342 | protein_coding | 4,03 | 0,0257457 |
| ENSG00000167600 | CYP2S1      | 19 | 41193049  | 41207539  | protein_coding | 4,03 | 0,1488645 |
| ENSG00000147010 | SH3KBP1     | X  | 19533975  | 19887601  | protein_coding | 4,02 | 0,0000000 |
| ENSG00000065154 | OAT         | 10 | 124397303 | 124418976 | protein_coding | 4,01 | 0,0012807 |
| ENSG00000169607 | CKAP2L      | 2  | 112736607 | 112764677 | protein_coding | 4,01 | 0,0172684 |
| ENSG00000172728 | FUT10       | 8  | 33370824  | 33473422  | protein_coding | 4,00 | 0,0000000 |
| ENSG00000108055 | SMC3        | 10 | 110567691 | 110604636 | protein_coding | 4,00 | 0,0000000 |
| ENSG00000169032 | MAP2K1      | 15 | 66386817  | 66492312  | protein_coding | 4,00 | 0,0012807 |
| ENSG00000096092 | TMEM14A     | 6  | 52671109  | 52686588  | protein_coding | 4,00 | 0,0062591 |
| ENSG00000161973 | CCDC42      | 17 | 8729934   | 8745219   | protein_coding | 4,00 | 0,3269660 |
| ENSG00000139767 | SRRM4       | 12 | 118981495 | 119163051 | protein_coding | 4,00 | 0,1245284 |
| ENSG00000259305 | ZHX1-C8orf7 | 8  | 123226189 | 123274284 | protein_coding | 4,00 | 0,3785161 |
| ENSG00000272636 | DOC2B       | 17 | 142789    | 181636    | protein_coding | 3,98 | 0,0050271 |
| ENSG00000065457 | ADAT1       | 16 | 75596981  | 75623300  | protein_coding | 3,98 | 0,0000000 |
| ENSG00000059728 | MXD1        | 2  | 69897688  | 69942945  | protein_coding | 3,98 | 0,0000000 |
| ENSG00000137880 | GCHFR       | 15 | 40764020  | 40767710  | protein_coding | 3,97 | 0,1598647 |
| ENSG00000141854 | ENSG000001  | 19 | 14072536  | 14075062  | protein_coding | 3,96 | 0,0075075 |
| ENSG00000214960 | ISPD        | 7  | 16087527  | 16421322  | protein_coding | 3,96 | 0,0012807 |
| ENSG00000070019 | GUCY2C      | 12 | 14612632  | 14696585  | protein_coding | 3,96 | 0,0012807 |



|                 |           |    |           |           |                |      |           |
|-----------------|-----------|----|-----------|-----------|----------------|------|-----------|
| ENSG00000157570 | TSPAN18   | 11 | 44726465  | 44932421  | protein_coding | 3,95 | 0,0793786 |
| ENSG00000112110 | MRPL18    | 6  | 159789812 | 159798436 | protein_coding | 3,95 | 0,0006696 |
| ENSG00000161920 | MED11     | 17 | 4731428   | 4733610   | protein_coding | 3,95 | 0,0012807 |
| ENSG00000127152 | BCL11B    | 14 | 99169287  | 99271524  | protein_coding | 3,95 | 0,1598647 |
| ENSG00000170365 | SMAD1     | 4  | 145481194 | 145558079 | protein_coding | 3,94 | 0,1867869 |
| ENSG00000162493 | PDPN      | 1  | 13583465  | 13617957  | protein_coding | 3,93 | 0,0012807 |
| ENSG00000174827 | PDZK1     | 1  | 145670852 | 145708148 | protein_coding | 3,92 | 0,0000000 |
| ENSG00000255529 | POLR2M    | 15 | 57706629  | 57782762  | protein_coding | 3,92 | 0,0000000 |
| ENSG00000131148 | EMC8      | 16 | 85771758  | 85799608  | protein_coding | 3,91 | 0,0000000 |
| ENSG00000176890 | TYMS      | 18 | 657604    | 673578    | protein_coding | 3,90 | 0,0025348 |
| ENSG00000111046 | MYF6      | 12 | 80707498  | 80709474  | protein_coding | 3,90 | 0,3269660 |
| ENSG00000186280 | KDM4D     | 11 | 94973681  | 94999518  | protein_coding | 3,89 | 0,0335607 |
| ENSG00000137273 | FOXF2     | 6  | 1389834   | 1395597   | protein_coding | 3,88 | 0,0335607 |
| ENSG00000129295 | LRRC6     | 8  | 132571953 | 132675617 | protein_coding | 3,87 | 0,0105771 |
| ENSG00000138346 | DNA2      | 10 | 68414064  | 68472121  | protein_coding | 3,87 | 0,0000000 |
| ENSG00000176124 | DLEU1     | 13 | 50082171  | 50723236  | protein_coding | 3,87 | 0,0257457 |
| ENSG00000080986 | NDC80     | 18 | 2571511   | 2616635   | protein_coding | 3,86 | 0,0050271 |
| ENSG00000166831 | RBPM52    | 15 | 64739892  | 64775587  | protein_coding | 3,86 | 0,0050271 |
| ENSG00000143195 | ILDR2     | 1  | 166895711 | 166975482 | protein_coding | 3,86 | 0,0012807 |
| ENSG00000122873 | CISD1     | 10 | 58269058  | 58289586  | protein_coding | 3,86 | 0,4999662 |
| ENSG00000205464 | ATP6AP1L  | 5  | 82279462  | 82386977  | protein_coding | 3,86 | 0,0609506 |
| ENSG00000171984 | C20orf196 | 20 | 5750393   | 5863912   | protein_coding | 3,85 | 0,0037996 |
| ENSG00000129460 | NGDN      | 14 | 23469688  | 23509862  | protein_coding | 3,83 | 0,0025348 |
| ENSG00000215421 | ZNF407    | 18 | 74597870  | 75065671  | protein_coding | 3,83 | 0,0000000 |
| ENSG00000182732 | RGS6      | 14 | 71932439  | 72566529  | protein_coding | 3,82 | 0,0025348 |
| ENSG00000141664 | ZCCHC2    | 18 | 62523007  | 62587709  | protein_coding | 3,82 | 0,0257457 |
| ENSG00000105185 | PDCD5     | 19 | 32581068  | 32587452  | protein_coding | 3,80 | 0,1867869 |
| ENSG00000136153 | LMO7      | 13 | 75620434  | 75859870  | protein_coding | 3,80 | 0,0000000 |
| ENSG00000141458 | NPC1      | 18 | 23506184  | 23586898  | protein_coding | 3,80 | 0,0000000 |
| ENSG00000177047 | IFNW1     | 9  | 21140214  | 21142145  | protein_coding | 3,80 | 0,1245284 |
| ENSG00000106541 | AGR2      | 7  | 16791811  | 16833433  | protein_coding | 3,80 | 0,0111464 |
| ENSG00000197323 | TRIM33    | 1  | 114392777 | 114511160 | protein_coding | 3,79 | 0,0012807 |
| ENSG00000115271 | GCA       | 2  | 162318840 | 162371595 | protein_coding | 3,79 | 0,1598647 |
| ENSG00000102054 | RBBP7     | X  | 16839283  | 16870414  | protein_coding | 3,79 | 0,0012807 |
| ENSG00000148950 | IMMP1L    | 11 | 31432401  | 31509645  | protein_coding | 3,77 | 0,0050271 |
| ENSG00000185666 | SYN3      | 22 | 32512552  | 33058372  | protein_coding | 3,77 | 0,0335607 |
| ENSG00000184277 | TM2D3     | 15 | 101621444 | 101652391 | protein_coding | 3,76 | 0,0012807 |
| ENSG00000135900 | MRPL44    | 2  | 223957404 | 223967714 | protein_coding | 3,76 | 0,0012807 |
| ENSG00000164900 | GBX1      | 7  | 151148589 | 151174745 | protein_coding | 3,75 | 0,0062591 |
| ENSG00000277149 | TYW1B     | 7  | 72558744  | 72828198  | protein_coding | 3,75 | 0,0300092 |
| ENSG00000141540 | TTYH2     | 17 | 74213514  | 74262020  | protein_coding | 3,74 | 0,0148097 |
| ENSG00000175691 | ZNF77     | 19 | 2933218   | 2944971   | protein_coding | 3,74 | 0,0012807 |
| ENSG00000129170 | CSRP3     | 11 | 19182030  | 19210573  | protein_coding | 3,74 | 0,6606414 |
| ENSG00000125898 | FAM110A   | 20 | 833715    | 857463    | protein_coding | 3,74 | 0,0012807 |
| ENSG00000109685 | WHSC1     | 4  | 1871424   | 1982207   | protein_coding | 3,72 | 0,0012807 |
| ENSG00000099282 | TSPAN15   | 10 | 69451473  | 69507669  | protein_coding | 3,72 | 0,0257457 |
| ENSG00000123612 | ACVR1C    | 2  | 157526767 | 157629005 | protein_coding | 3,72 | 0,0075075 |
| ENSG00000221988 | PPT2      | 6  | 32153441  | 32163680  | protein_coding | 3,71 | 0,0012807 |
| ENSG00000101331 | CCM2L     | 20 | 32010450  | 32032180  | protein_coding | 3,70 | 0,0184474 |
| ENSG00000158901 | WFDC8     | 20 | 45551153  | 45579326  | protein_coding | 3,70 | 0,1245284 |
| ENSG00000223638 | RFPL4A    | 19 | 55759014  | 55763175  | protein_coding | 3,70 | 0,6142622 |
| ENSG00000166368 | OR2D2     | 11 | 6891490   | 6892599   | protein_coding | 3,70 | 0,0418702 |
| ENSG00000170819 | BFSP2     | 3  | 133399995 | 133475222 | protein_coding | 3,70 | 0,1245284 |
| ENSG00000133773 | CCDC59    | 12 | 82223681  | 82358805  | protein_coding | 3,69 | 0,1598647 |
| ENSG00000132938 | MTUS2     | 13 | 28820348  | 29505947  | protein_coding | 3,69 | 0,0586426 |

|                 |          |    |           |           |                |      |           |
|-----------------|----------|----|-----------|-----------|----------------|------|-----------|
| ENSG00000139131 | YARS2    | 12 | 32727490  | 32755902  | protein_coding | 3,69 | 0,0012807 |
| ENSG00000157680 | DGKI     | 7  | 137381037 | 137847092 | protein_coding | 3,69 | 0,0050271 |
| ENSG00000132016 | C19orf57 | 19 | 13882348  | 13906452  | protein_coding | 3,68 | 0,0012807 |
| ENSG00000088766 | CRLS1    | 20 | 6006090   | 6040053   | protein_coding | 3,68 | 0,0995111 |
| ENSG00000163634 | THOC7    | 3  | 63833870  | 63863903  | protein_coding | 3,68 | 0,0995111 |
| ENSG00000121851 | POLR3GL  | 1  | 145964702 | 145978848 | protein_coding | 3,67 | 0,1867869 |
| ENSG00000165113 | GKAP1    | 9  | 83739421  | 83829516  | protein_coding | 3,67 | 0,0335607 |
| ENSG00000137221 | TJAP1    | 6  | 43477523  | 43506556  | protein_coding | 3,67 | 0,0000000 |
| ENSG00000143190 | POU2F1   | 1  | 167220829 | 167427345 | protein_coding | 3,66 | 0,1245284 |
| ENSG00000172361 | CFAP53   | 18 | 50227193  | 50266522  | protein_coding | 3,65 | 0,0050271 |
| ENSG00000108984 | MAP2K6   | 17 | 69414698  | 69543331  | protein_coding | 3,64 | 0,0335607 |
| ENSG00000158715 | SLC45A3  | 1  | 205657851 | 205680459 | protein_coding | 3,64 | 0,0000000 |
| ENSG00000130695 | CEP85    | 1  | 26234153  | 26279038  | protein_coding | 3,63 | 0,0012807 |
| ENSG00000196660 | SLC30A10 | 1  | 219685427 | 219958647 | protein_coding | 3,63 | 0,4463415 |
| ENSG00000153012 | LGI2     | 4  | 24998847  | 25030879  | protein_coding | 3,62 | 0,0172684 |
| ENSG00000102738 | MRPS31   | 13 | 40729135  | 40771173  | protein_coding | 3,62 | 0,2725752 |
| ENSG00000138801 | PAPSS1   | 4  | 107590276 | 107720452 | protein_coding | 3,62 | 0,0000000 |
| ENSG00000273611 | ZNHIT3   | 17 | 36486629  | 36499310  | protein_coding | 3,62 | 0,0012807 |
| ENSG00000273559 | CWC25    | 17 | 38800434  | 38825481  | protein_coding | 3,61 | 0,0793786 |
| ENSG00000145979 | TBC1D7   | 6  | 13266542  | 13328583  | protein_coding | 3,61 | 0,0012807 |
| ENSG00000148700 | ADD3     | 10 | 109996368 | 110135565 | protein_coding | 3,60 | 0,0012807 |
| ENSG00000138136 | LBX1     | 10 | 101226195 | 101229794 | protein_coding | 3,60 | 0,6142622 |
| ENSG00000101981 | F9       | X  | 139530758 | 139563458 | protein_coding | 3,60 | 0,3269660 |
| ENSG00000054654 | SYNE2    | 14 | 63852983  | 64226433  | protein_coding | 3,60 | 0,1245284 |
| ENSG00000171202 | TMEM126A | 11 | 85647967  | 85656547  | protein_coding | 3,59 | 0,0418702 |
| ENSG00000156273 | BACH1    | 21 | 29194071  | 29630751  | protein_coding | 3,59 | 0,0000000 |
| ENSG00000151572 | ANO4     | 12 | 100717526 | 101128641 | protein_coding | 3,58 | 0,0000000 |
| ENSG00000144395 | CCDC150  | 2  | 196639554 | 196763490 | protein_coding | 3,58 | 0,0000000 |
| ENSG00000109944 | C11orf63 | 11 | 122882528 | 122959798 | protein_coding | 3,58 | 0,2127456 |
| ENSG00000149970 | CNKSR2   | X  | 21374418  | 21654695  | protein_coding | 3,58 | 0,0012807 |
| ENSG00000214212 | C19orf38 | 19 | 10836575  | 10869790  | protein_coding | 3,58 | 0,4999662 |
| ENSG00000121039 | RDH10    | 8  | 73294612  | 73325281  | protein_coding | 3,57 | 0,0025348 |
| ENSG00000158545 | ZC3H18   | 16 | 88570381  | 88631966  | protein_coding | 3,57 | 0,4999662 |
| ENSG00000116791 | CRYZ     | 1  | 74705482  | 74733408  | protein_coding | 3,57 | 0,0012807 |
| ENSG00000164778 | EN2      | 7  | 155458129 | 155464831 | protein_coding | 3,57 | 0,0509539 |
| ENSG00000144554 | FANCD2   | 3  | 10026414  | 10101930  | protein_coding | 3,56 | 0,0538744 |
| ENSG00000152192 | POU4F1   | 13 | 78598362  | 78603560  | protein_coding | 3,56 | 0,1245284 |
| ENSG00000112394 | SLC16A10 | 6  | 111087503 | 111231194 | protein_coding | 3,56 | 0,0012807 |
| ENSG00000166455 | C16orf46 | 16 | 81053497  | 81077267  | protein_coding | 3,56 | 0,0050271 |
| ENSG00000167065 | DUSP18   | 22 | 30652051  | 30667890  | protein_coding | 3,54 | 0,0037996 |
| ENSG00000177483 | RBM44    | 2  | 237798389 | 237842808 | protein_coding | 3,54 | 0,1867869 |
| ENSG00000160588 | MPZL3    | 11 | 118226690 | 118252350 | protein_coding | 3,54 | 0,0586426 |
| ENSG00000115363 | EVA1A    | 2  | 75469302  | 75569722  | protein_coding | 3,54 | 0,3963183 |
| ENSG00000187908 | DMBT1    | 10 | 122560665 | 122643736 | protein_coding | 3,53 | 0,4808196 |
| ENSG00000204842 | ATXN2    | 12 | 111452214 | 111599676 | protein_coding | 3,53 | 0,1245284 |
| ENSG00000178966 | RMI1     | 9  | 83980711  | 84004074  | protein_coding | 3,52 | 0,0012807 |
| ENSG00000166452 | AKIP1    | 11 | 8911139   | 8920084   | protein_coding | 3,52 | 0,0012807 |
| ENSG00000168589 | DYNLRB2  | 16 | 80540734  | 80550760  | protein_coding | 3,51 | 0,1598647 |
| ENSG00000134222 | PSRC1    | 1  | 109279556 | 109283186 | protein_coding | 3,51 | 0,0000000 |
| ENSG00000183431 | SF3A3    | 1  | 37956975  | 37990921  | protein_coding | 3,50 | 0,0012807 |
| ENSG00000164105 | SAP30    | 4  | 173369969 | 173377532 | protein_coding | 3,50 | 0,0257457 |
| ENSG00000176177 | ENTHD1   | 22 | 39743044  | 39893864  | protein_coding | 3,50 | 0,1245284 |
| ENSG00000137090 | DMRT1    | 9  | 841690    | 969090    | protein_coding | 3,50 | 0,1245284 |
| ENSG00000168913 | ENHO     | 9  | 34521040  | 34523041  | protein_coding | 3,50 | 0,1775672 |
| ENSG00000178919 | FOXE1    | 9  | 97853254  | 97856715  | protein_coding | 3,50 | 0,0418702 |

|                 |         |    |           |           |                |      |           |
|-----------------|---------|----|-----------|-----------|----------------|------|-----------|
| ENSG00000130368 | MAS1    | 6  | 159906690 | 159916530 | protein_coding | 3,50 | 0,0111464 |
| ENSG00000065534 | MYLK    | 3  | 123610049 | 123884331 | protein_coding | 3,49 | 0,0050271 |
| ENSG00000169375 | SIN3A   | 15 | 75369379  | 75455842  | protein_coding | 3,49 | 0,0000000 |
| ENSG00000067798 | NAV3    | 12 | 77830905  | 78213008  | protein_coding | 3,49 | 0,0012807 |
| ENSG00000198604 | BAZ1A   | 14 | 34752731  | 34875647  | protein_coding | 3,48 | 0,0075075 |
| ENSG00000085840 | ORC1    | 1  | 52372829  | 52404459  | protein_coding | 3,48 | 0,1867869 |
| ENSG00000121274 | PAPD5   | 16 | 50152918  | 50235310  | protein_coding | 3,47 | 0,0793786 |
| ENSG00000115758 | ODC1    | 2  | 10439968  | 10448504  | protein_coding | 3,47 | 0,0012807 |
| ENSG00000181333 | HEPHL1  | 11 | 94021361  | 94113751  | protein_coding | 3,47 | 0,0111464 |
| ENSG00000163618 | CADPS   | 3  | 62398346  | 62875389  | protein_coding | 3,46 | 0,0012807 |
| ENSG00000105991 | HOXA1   | 7  | 27092993  | 27095996  | protein_coding | 3,45 | 0,0075075 |
| ENSG00000151164 | RAD9B   | 12 | 110501655 | 110532086 | protein_coding | 3,45 | 0,3096079 |
| ENSG00000159208 | CIART   | 1  | 150282543 | 150287093 | protein_coding | 3,44 | 0,0012807 |
| ENSG00000179270 | C2orf71 | 2  | 29060976  | 29074261  | protein_coding | 3,43 | 0,0062591 |
| ENSG00000139168 | ZCRB1   | 12 | 42312078  | 42326118  | protein_coding | 3,43 | 0,2229774 |
| ENSG00000131747 | TOP2A   | 17 | 40388516  | 40417950  | protein_coding | 3,42 | 0,0335607 |
| ENSG00000183023 | SLC8A1  | 2  | 40097270  | 40611053  | protein_coding | 3,41 | 0,0012807 |
| ENSG00000081870 | HSPB11  | 1  | 53916574  | 53945929  | protein_coding | 3,41 | 0,0538744 |
| ENSG00000121542 | SEC22A  | 3  | 123201927 | 123274130 | protein_coding | 3,41 | 0,0075075 |
| ENSG00000139350 | NEDD1   | 12 | 96907223  | 96953777  | protein_coding | 3,40 | 0,0075075 |
| ENSG00000186106 | ANKRD46 | 8  | 100509752 | 100559784 | protein_coding | 3,40 | 0,0184474 |
| ENSG00000182578 | CSF1R   | 5  | 150053291 | 150113372 | protein_coding | 3,40 | 0,0012807 |
| ENSG00000197977 | ELOVL2  | 6  | 10980759  | 11044314  | protein_coding | 3,39 | 0,0012807 |
| ENSG00000113318 | MSH3    | 5  | 80654648  | 80876460  | protein_coding | 3,39 | 0,0025348 |
| ENSG00000187775 | DNAH17  | 17 | 78423697  | 78577394  | protein_coding | 3,38 | 0,0300092 |
| ENSG00000135945 | REV1    | 2  | 99400475  | 99490035  | protein_coding | 3,38 | 0,0012807 |
| ENSG00000151948 | GLT1D1  | 12 | 128853427 | 128984968 | protein_coding | 3,38 | 0,0012807 |
| ENSG00000167554 | ZNF610  | 19 | 52336245  | 52367778  | protein_coding | 3,37 | 0,1245284 |
| ENSG00000185480 | PARBP   | 12 | 102120185 | 102197520 | protein_coding | 3,37 | 0,0000000 |
| ENSG00000154611 | PSMA8   | 18 | 26133852  | 26193355  | protein_coding | 3,37 | 0,0300092 |
| ENSG00000154914 | USP43   | 17 | 9644698   | 9729691   | protein_coding | 3,37 | 0,2725752 |
| ENSG00000146857 | STRA8   | 7  | 135231979 | 135258492 | protein_coding | 3,36 | 0,2229774 |
| ENSG00000102984 | ZNF821  | 16 | 71859680  | 71895336  | protein_coding | 3,36 | 0,0012807 |
| ENSG00000086061 | DNAJA1  | 9  | 33025211  | 33039907  | protein_coding | 3,35 | 0,0075075 |
| ENSG00000169564 | PCBP1   | 2  | 70087454  | 70089203  | protein_coding | 3,34 | 0,0012807 |
| ENSG00000131626 | PPFIA1  | 11 | 70270700  | 70384403  | protein_coding | 3,34 | 0,0000000 |
| ENSG00000085449 | WDFY1   | 2  | 223855716 | 223945387 | protein_coding | 3,34 | 0,0025348 |
| ENSG00000205038 | PKHD1L1 | 8  | 109362477 | 109530330 | protein_coding | 3,33 | 0,3785161 |
| ENSG00000157191 | NECAP2  | 1  | 16440672  | 16460078  | protein_coding | 3,33 | 0,0012807 |
| ENSG00000172575 | RASGRP1 | 15 | 38488103  | 38565575  | protein_coding | 3,33 | 0,0000000 |
| ENSG00000130560 | UBAC1   | 9  | 135932969 | 135961380 | protein_coding | 3,32 | 0,0012807 |
| ENSG00000133477 | FAM83F  | 22 | 39994949  | 40043529  | protein_coding | 3,32 | 0,1488645 |
| ENSG00000141858 | SAMD1   | 19 | 14087840  | 14091036  | protein_coding | 3,32 | 0,0717418 |
| ENSG00000162244 | RPL29   | 3  | 51993600  | 51995942  | protein_coding | 3,30 | 0,0335607 |
| ENSG00000124196 | GTSF1L  | 20 | 43726164  | 43726998  | protein_coding | 3,30 | 0,0418702 |
| ENSG00000204671 | IL31    | 12 | 122172030 | 122174199 | protein_coding | 3,30 | 0,3269660 |
| ENSG00000122194 | PLG     | 6  | 160702238 | 160753315 | protein_coding | 3,30 | 0,0111464 |
| ENSG00000181867 | FTMT    | 5  | 121851955 | 121852833 | protein_coding | 3,30 | 0,1245284 |
| ENSG00000162490 | DRAXIN  | 1  | 11691729  | 11725857  | protein_coding | 3,30 | 0,0418702 |
| ENSG00000268988 | SPANXN2 | X  | 143711955 | 143721423 | protein_coding | 3,30 | 0,1245284 |
| ENSG00000197928 | ZNF677  | 19 | 53235381  | 53254898  | protein_coding | 3,30 | 0,0075075 |
| ENSG00000089006 | SNX5    | 20 | 17941597  | 17968980  | protein_coding | 3,30 | 0,0012807 |
| ENSG00000138193 | PLCE1   | 10 | 93993989  | 94332823  | protein_coding | 3,30 | 0,1867869 |
| ENSG00000094804 | CDC6    | 17 | 40287633  | 40304657  | protein_coding | 3,29 | 0,1867869 |
| ENSG00000183814 | LIN9    | 1  | 226231149 | 226309869 | protein_coding | 3,29 | 0,0012807 |

|                 |                 |    |           |           |                |      |           |
|-----------------|-----------------|----|-----------|-----------|----------------|------|-----------|
| ENSG00000186184 | POLR1D          | 13 | 27620742  | 27667415  | protein_coding | 3,28 | 0,0335607 |
| ENSG00000141576 | RNF157          | 17 | 76142453  | 76240373  | protein_coding | 3,28 | 0,0793786 |
| ENSG00000006634 | DBF4            | 7  | 87876216  | 87909541  | protein_coding | 3,28 | 0,1867869 |
| ENSG00000167513 | CDT1            | 16 | 88803213  | 88809258  | protein_coding | 3,28 | 0,0037996 |
| ENSG00000075035 | WSCD2           | 12 | 108129471 | 108250537 | protein_coding | 3,27 | 0,0793786 |
| ENSG00000148942 | SLC5A12         | 11 | 26667019  | 26723427  | protein_coding | 3,27 | 0,2600087 |
| ENSG00000197077 | KIAA1671        | 22 | 24952730  | 25197448  | protein_coding | 3,27 | 0,0000000 |
| ENSG00000164114 | MAP9            | 4  | 155342658 | 155376970 | protein_coding | 3,27 | 0,1245284 |
| ENSG00000001460 | STPG1           | 1  | 24356999  | 24416934  | protein_coding | 3,26 | 0,0000000 |
| ENSG00000173253 | DMRT2           | 9  | 1049858   | 1057552   | protein_coding | 3,26 | 0,3269660 |
| ENSG00000185267 | CDNF            | 10 | 14819250  | 14838575  | protein_coding | 3,26 | 0,0793786 |
| ENSG00000241978 | AKAP2           | 9  | 110048598 | 110172512 | protein_coding | 3,26 | 0,1598647 |
| ENSG00000120833 | SOCS2           | 12 | 93569814  | 93583487  | protein_coding | 3,25 | 0,0012807 |
| ENSG00000115109 | EPB41L5         | 2  | 120013005 | 120179119 | protein_coding | 3,24 | 0,0025348 |
| ENSG00000149596 | JPH2            | 20 | 44111695  | 44187578  | protein_coding | 3,24 | 0,2127456 |
| ENSG00000042813 | ZBPB            | 7  | 49850421  | 50121329  | protein_coding | 3,24 | 0,1598647 |
| ENSG00000032219 | ARID4A          | 14 | 58298385  | 58373887  | protein_coding | 3,22 | 0,1867869 |
| ENSG00000151748 | SAV1            | 14 | 50632058  | 50668331  | protein_coding | 3,22 | 0,0012807 |
| ENSG00000182759 | MAFA            | 8  | 143419182 | 143430406 | protein_coding | 3,21 | 0,1775672 |
| ENSG00000144645 | OSBPL10         | 3  | 31657890  | 32077580  | protein_coding | 3,21 | 0,0012807 |
| ENSG00000131351 | HAUS8           | 19 | 17049729  | 17075625  | protein_coding | 3,21 | 0,0418702 |
| ENSG00000004779 | NDUFAB1         | 16 | 23581002  | 23596356  | protein_coding | 3,21 | 0,0025348 |
| ENSG00000139445 | FOXN4           | 12 | 109277979 | 109309220 | protein_coding | 3,21 | 0,1168222 |
| ENSG00000133020 | MYH8            | 17 | 10390322  | 10421950  | protein_coding | 3,20 | 0,1245284 |
| ENSG00000103355 | PRSS33          | 16 | 2783953   | 2787948   | protein_coding | 3,20 | 0,3269660 |
| ENSG00000149452 | SLC22A8         | 11 | 62989154  | 63015839  | protein_coding | 3,20 | 0,0418702 |
| ENSG00000168267 | PTF1A           | 10 | 23192327  | 23194252  | protein_coding | 3,20 | 0,3269660 |
| ENSG00000260220 | CCDC187         | 9  | 136280942 | 136306901 | protein_coding | 3,20 | 0,6142622 |
| ENSG00000106302 | HYAL4           | 7  | 123828983 | 123877478 | protein_coding | 3,20 | 0,6142622 |
| ENSG00000156925 | ZIC3            | X  | 137566142 | 137577691 | protein_coding | 3,20 | 0,0111464 |
| ENSG00000069020 | MAST4           | 5  | 66596361  | 67169595  | protein_coding | 3,19 | 0,0184474 |
| ENSG00000124596 | OARD1           | 6  | 41033627  | 41097787  | protein_coding | 3,19 | 0,0012807 |
| ENSG00000263809 | ENSG00000263809 | 17 | 8368638   | 8383187   | protein_coding | 3,19 | 0,4999662 |
| ENSG00000144452 | ABCA12          | 2  | 214931542 | 215138428 | protein_coding | 3,19 | 0,0000000 |
| ENSG00000205838 | TTC23L          | 5  | 34838833  | 34899456  | protein_coding | 3,18 | 0,2600087 |
| ENSG00000215186 | GOLGA6B         | 15 | 72654738  | 72666394  | protein_coding | 3,18 | 0,2229774 |
| ENSG00000140543 | DET1            | 15 | 88511559  | 88546675  | protein_coding | 3,18 | 0,0012807 |
| ENSG00000168216 | LMBRD1          | 6  | 69675802  | 69797111  | protein_coding | 3,17 | 0,1245284 |
| ENSG00000120149 | MSX2            | 5  | 174724533 | 174730893 | protein_coding | 3,17 | 0,0050271 |
| ENSG00000241186 | TDGF1           | 3  | 46574555  | 46626543  | protein_coding | 3,17 | 0,3269660 |
| ENSG00000005108 | THSD7A          | 7  | 11370357  | 11832198  | protein_coding | 3,16 | 0,1245284 |
| ENSG00000136925 | TSTD2           | 9  | 97600080  | 97633575  | protein_coding | 3,16 | 0,0012807 |
| ENSG00000197808 | ZNF461          | 19 | 36637192  | 36666853  | protein_coding | 3,16 | 0,0335607 |
| ENSG00000146707 | POMZP3          | 7  | 76609986  | 76627261  | protein_coding | 3,16 | 0,0025348 |
| ENSG00000183150 | GPR19           | 12 | 12660891  | 12696207  | protein_coding | 3,16 | 0,0062591 |
| ENSG00000151849 | CENPJ           | 13 | 24882284  | 24922889  | protein_coding | 3,16 | 0,0717418 |
| ENSG00000087302 | C14orf166       | 14 | 51989475  | 52010691  | protein_coding | 3,16 | 0,0111464 |
| ENSG00000160886 | LY6K            | 8  | 142700111 | 142705127 | protein_coding | 3,15 | 0,0148097 |
| ENSG00000168658 | VWA3B           | 2  | 98087116  | 98313299  | protein_coding | 3,15 | 0,3963183 |
| ENSG00000157470 | FAM81A          | 15 | 59372693  | 59523549  | protein_coding | 3,15 | 0,0012807 |
| ENSG00000106305 | AIMP2           | 7  | 6009245   | 6023834   | protein_coding | 3,14 | 0,0012807 |
| ENSG00000175354 | PTPN2           | 18 | 12785478  | 12929643  | protein_coding | 3,14 | 0,0025348 |
| ENSG00000131969 | ABHD12B         | 14 | 50872160  | 50904970  | protein_coding | 3,13 | 0,0335607 |
| ENSG00000156983 | BRPF1           | 3  | 9731729   | 9748018   | protein_coding | 3,13 | 0,4999662 |
| ENSG00000184635 | ZNF93           | 19 | 19900913  | 19935575  | protein_coding | 3,13 | 0,0012807 |

|                 |          |    |           |           |                |      |           |
|-----------------|----------|----|-----------|-----------|----------------|------|-----------|
| ENSG00000144451 | SPAG16   | 2  | 213284379 | 214410501 | protein_coding | 3,13 | 0,0012807 |
| ENSG00000149658 | YTHDF1   | 20 | 63195429  | 63216234  | protein_coding | 3,12 | 0,0012807 |
| ENSG00000114737 | CISH     | 3  | 50606490  | 50611831  | protein_coding | 3,12 | 0,0184474 |
| ENSG00000115128 | SF3B6    | 2  | 24067584  | 24076443  | protein_coding | 3,10 | 0,3269660 |
| ENSG00000166004 | CEP295   | 11 | 93661639  | 93730358  | protein_coding | 3,10 | 0,0012807 |
| ENSG00000196504 | PRPF40A  | 2  | 152651593 | 152717997 | protein_coding | 3,10 | 0,2229774 |
| ENSG00000169129 | AFAP1L2  | 10 | 114294824 | 114404756 | protein_coding | 3,10 | 0,1168222 |
| ENSG00000181035 | SLC25A42 | 19 | 19063999  | 19112888  | protein_coding | 3,10 | 0,0012807 |
| ENSG00000151025 | GPR158   | 10 | 25175062  | 25602226  | protein_coding | 3,09 | 0,0335607 |
| ENSG00000134852 | CLOCK    | 4  | 55427903  | 55547138  | protein_coding | 3,09 | 0,0111464 |
| ENSG00000262655 | SPON1    | 11 | 13962689  | 14267884  | protein_coding | 3,09 | 0,0012807 |
| ENSG00000196470 | SIAH1    | 16 | 48356364  | 48448402  | protein_coding | 3,09 | 0,0111464 |
| ENSG00000181826 | RELL1    | 4  | 37590800  | 37686376  | protein_coding | 3,08 | 0,0995111 |
| ENSG00000137513 | NARS2    | 11 | 78435961  | 78574874  | protein_coding | 3,08 | 0,0025348 |
| ENSG00000111913 | FAM65B   | 6  | 24804282  | 25042168  | protein_coding | 3,07 | 0,0335607 |
| ENSG00000005020 | SKAP2    | 7  | 26667062  | 26995239  | protein_coding | 3,07 | 0,0111464 |
| ENSG00000179399 | GPC5     | 13 | 91398607  | 92873682  | protein_coding | 3,07 | 0,0184474 |
| ENSG00000006757 | PNPLA4   | X  | 7898247   | 7927739   | protein_coding | 3,06 | 0,0012807 |
| ENSG00000164236 | ANKRD33B | 5  | 10564330  | 10657816  | protein_coding | 3,06 | 0,0793786 |
| ENSG00000170854 | MINA     | 3  | 97941818  | 97972457  | protein_coding | 3,06 | 0,0012807 |
| ENSG00000186812 | ZNF397   | 18 | 35241030  | 35267133  | protein_coding | 3,06 | 0,0609506 |
| ENSG00000065717 | TLE2     | 19 | 2997638   | 3047635   | protein_coding | 3,05 | 0,2725752 |
| ENSG00000139988 | RDH12    | 14 | 67701886  | 67734452  | protein_coding | 3,05 | 0,1775672 |
| ENSG00000132819 | RBM38    | 20 | 57391407  | 57409333  | protein_coding | 3,04 | 0,1245284 |
| ENSG00000186868 | MAPT     | 17 | 45894382  | 46028334  | protein_coding | 3,04 | 0,2725752 |
| ENSG00000169599 | NFU1     | 2  | 69395750  | 69437628  | protein_coding | 3,03 | 0,0075075 |
| ENSG00000154839 | SKA1     | 18 | 50374995  | 50394173  | protein_coding | 3,03 | 0,1168222 |
| ENSG00000197576 | HOXA4    | 7  | 27128507  | 27130799  | protein_coding | 3,02 | 0,0509539 |
| ENSG00000169155 | ZBTB43   | 9  | 126805006 | 126838210 | protein_coding | 3,02 | 0,0184474 |
| ENSG00000166477 | LEO1     | 15 | 51938025  | 51971806  | protein_coding | 3,02 | 0,0025348 |
| ENSG00000181274 | FRAT2    | 10 | 97332497  | 97334709  | protein_coding | 3,02 | 0,0012807 |
| ENSG00000128276 | RFPL3    | 22 | 32354885  | 32361161  | protein_coding | 3,01 | 0,0025348 |
| ENSG00000153064 | BANK1    | 4  | 101411286 | 102074812 | protein_coding | 3,01 | 0,0075075 |
| ENSG00000183230 | CTNNA3   | 10 | 65912518  | 67696169  | protein_coding | 3,01 | 0,0025348 |
| ENSG00000136045 | PWP1     | 12 | 107685732 | 107713167 | protein_coding | 3,01 | 0,0075075 |
| ENSG00000102781 | KATNAL1  | 13 | 30202630  | 30307484  | protein_coding | 3,00 | 0,0012807 |
| ENSG00000138767 | CNOT6L   | 4  | 77713387  | 77819615  | protein_coding | 3,00 | 0,0012807 |
| ENSG00000196091 | MYBPC1   | 12 | 101568353 | 101686018 | protein_coding | 3,00 | 0,1245284 |
| ENSG00000170290 | SLN      | 11 | 107707378 | 107719693 | protein_coding | 3,00 | 0,0184474 |
| ENSG00000183715 | OPCML    | 11 | 132414977 | 133532519 | protein_coding | 3,00 | 0,0418702 |
| ENSG00000183621 | ZNF438   | 10 | 30820207  | 31031937  | protein_coding | 3,00 | 0,0012807 |
| ENSG00000013293 | SLC7A14  | 3  | 170459584 | 170586074 | protein_coding | 3,00 | 0,3269660 |
| ENSG00000205086 | C2orf91  | 2  | 41935368  | 41954266  | protein_coding | 3,00 | 0,1245284 |
| ENSG00000170340 | B3GNT2   | 2  | 62196113  | 62224731  | protein_coding | 2,99 | 0,0075075 |
| ENSG00000160563 | MED27    | 9  | 131860107 | 132079908 | protein_coding | 2,99 | 0,0012807 |
| ENSG00000164116 | GUCY1A3  | 4  | 155666711 | 155732349 | protein_coding | 2,99 | 0,2600087 |
| ENSG00000112182 | BACH2    | 6  | 89926529  | 90296908  | protein_coding | 2,97 | 0,0335607 |
| ENSG00000111581 | NUP107   | 12 | 68686734  | 68745809  | protein_coding | 2,97 | 0,1245284 |
| ENSG00000198780 | FAM169A  | 5  | 74777574  | 74866951  | protein_coding | 2,96 | 0,0012807 |
| ENSG00000171914 | TLN2     | 15 | 62390526  | 62844631  | protein_coding | 2,95 | 0,0418702 |
| ENSG00000105928 | DFNA5    | 7  | 24698353  | 24758113  | protein_coding | 2,95 | 0,0012807 |
| ENSG00000132326 | PER2     | 2  | 238244038 | 238290102 | protein_coding | 2,95 | 0,0012807 |
| ENSG00000100281 | HMGXB4   | 22 | 35257452  | 35295807  | protein_coding | 2,94 | 0,0184474 |
| ENSG00000114648 | KLHL18   | 3  | 47282917  | 47346816  | protein_coding | 2,94 | 0,0111464 |
| ENSG00000261794 | GOLGA8H  | 15 | 30604126  | 30614561  | protein_coding | 2,94 | 0,5364729 |

|                 |           |    |           |           |                |      |           |
|-----------------|-----------|----|-----------|-----------|----------------|------|-----------|
| ENSG00000164615 | CAMLG     | 5  | 134738501 | 134752160 | protein_coding | 2,94 | 0,0418702 |
| ENSG00000183780 | SLC35F3   | 1  | 233904933 | 234324516 | protein_coding | 2,94 | 0,0257457 |
| ENSG00000175906 | ARL4D     | 17 | 43398959  | 43401137  | protein_coding | 2,93 | 0,0148097 |
| ENSG00000170310 | STX8      | 17 | 9250471   | 9576591   | protein_coding | 2,93 | 0,1867869 |
| ENSG00000156076 | WIF1      | 12 | 65050626  | 65121566  | protein_coding | 2,93 | 0,0995111 |
| ENSG00000171055 | FEZ2      | 2  | 36531805  | 36646087  | protein_coding | 2,93 | 0,0335607 |
| ENSG00000109762 | SNX25     | 4  | 185204237 | 185370185 | protein_coding | 2,93 | 0,0012807 |
| ENSG00000266094 | RASSF5    | 1  | 206507530 | 206589283 | protein_coding | 2,92 | 0,0793786 |
| ENSG00000184949 | FAM227A   | 22 | 38578120  | 38656629  | protein_coding | 2,92 | 0,0335607 |
| ENSG00000136492 | BRIP1     | 17 | 61681266  | 61863521  | protein_coding | 2,91 | 0,0037996 |
| ENSG00000115652 | UXS1      | 2  | 106093303 | 106194339 | protein_coding | 2,90 | 0,0012807 |
| ENSG00000215455 | KRTAP10-1 | 21 | 44538981  | 44540195  | protein_coding | 2,90 | 0,6142622 |
| ENSG00000185372 | OR2V1     | 5  | 181124357 | 181125304 | protein_coding | 2,90 | 0,0418702 |
| ENSG00000184022 | OR2T10    | 1  | 248592830 | 248593768 | protein_coding | 2,90 | 0,3269660 |
| ENSG00000138400 | MDH1B     | 2  | 206737763 | 206765547 | protein_coding | 2,90 | 0,0148097 |
| ENSG00000170322 | NFRKB     | 11 | 129863636 | 129895590 | protein_coding | 2,89 | 0,0012807 |
| ENSG00000076650 | GPATCH1   | 19 | 33080880  | 33130542  | protein_coding | 2,89 | 0,1867869 |
| ENSG00000172795 | DCP2      | 5  | 112976702 | 113020970 | protein_coding | 2,89 | 0,0000000 |
| ENSG00000146670 | CDCA5     | 11 | 65066300  | 65084164  | protein_coding | 2,89 | 0,0037996 |
| ENSG00000119397 | CNTRL     | 9  | 121074863 | 121177610 | protein_coding | 2,89 | 0,0793786 |
| ENSG00000083093 | PALB2     | 16 | 23603160  | 23641310  | protein_coding | 2,89 | 0,0012807 |
| ENSG00000186469 | GNG2      | 14 | 51826195  | 51979342  | protein_coding | 2,89 | 0,0075075 |
| ENSG00000213390 | ARHGAP19  | 10 | 97222173  | 97292673  | protein_coding | 2,88 | 0,0075075 |
| ENSG00000114790 | ARHGEF26  | 3  | 154121003 | 154257827 | protein_coding | 2,88 | 0,1598647 |
| ENSG00000135823 | STX6      | 1  | 180972712 | 181023121 | protein_coding | 2,88 | 0,0012807 |
| ENSG00000113558 | SKP1      | 5  | 134148935 | 134177038 | protein_coding | 2,87 | 0,1598647 |
| ENSG00000126226 | PCID2     | 13 | 113177539 | 113208715 | protein_coding | 2,87 | 0,0012807 |
| ENSG00000065600 | TMEM206   | 1  | 212363931 | 212414901 | protein_coding | 2,87 | 0,0012807 |
| ENSG00000100625 | SIX4      | 14 | 60709528  | 60724348  | protein_coding | 2,87 | 0,5364729 |
| ENSG00000159197 | KCNE2     | 21 | 34364024  | 34371389  | protein_coding | 2,86 | 0,0586426 |
| ENSG00000127903 | ZNF835    | 19 | 56661981  | 56671783  | protein_coding | 2,86 | 0,0793786 |
| ENSG00000162396 | PARS2     | 1  | 54756898  | 54764514  | protein_coding | 2,86 | 0,0025348 |
| ENSG00000140416 | TPM1      | 15 | 63042632  | 63071915  | protein_coding | 2,85 | 0,0335607 |
| ENSG00000132475 | H3F3B     | 17 | 75776434  | 75785893  | protein_coding | 2,85 | 0,0037996 |
| ENSG00000010539 | ZNF200    | 16 | 3222325   | 3236221   | protein_coding | 2,85 | 0,0062591 |
| ENSG00000166546 | BEAN1     | 16 | 66427297  | 66493529  | protein_coding | 2,85 | 0,0995111 |
| ENSG00000131931 | THAP1     | 8  | 42836674  | 42843325  | protein_coding | 2,84 | 0,0184474 |
| ENSG00000151552 | QDPR      | 4  | 17460261  | 17512234  | protein_coding | 2,84 | 0,0062591 |
| ENSG00000152348 | ATG10     | 5  | 81972025  | 82276857  | protein_coding | 2,84 | 0,3269660 |
| ENSG00000126249 | PDCD2L    | 19 | 34404384  | 34426168  | protein_coding | 2,84 | 0,0793786 |
| ENSG00000150556 | LYPD6B    | 2  | 149038107 | 149215262 | protein_coding | 2,83 | 0,0717418 |
| ENSG00000162076 | FLYWCH2   | 16 | 2883186   | 2899382   | protein_coding | 2,83 | 0,4999662 |
| ENSG00000205853 | RFPL3S    | 22 | 32359906  | 32382052  | protein_coding | 2,82 | 0,0012807 |
| ENSG00000250091 | DNAH10OS  | 12 | 123926424 | 123934984 | protein_coding | 2,82 | 0,0006696 |
| ENSG00000174720 | LARP7     | 4  | 112636964 | 112657592 | protein_coding | 2,81 | 0,4463415 |
| ENSG00000144895 | EIF2A     | 3  | 150546678 | 150584242 | protein_coding | 2,80 | 0,1598647 |
| ENSG00000133115 | STOML3    | 13 | 38965925  | 38991066  | protein_coding | 2,80 | 0,3269660 |
| ENSG00000187918 | OR51I2    | 11 | 5453489   | 5454427   | protein_coding | 2,80 | 0,3269660 |
| ENSG00000030304 | MUSK      | 9  | 110668771 | 110801620 | protein_coding | 2,80 | 0,1245284 |
| ENSG00000183148 | ANKRD20A2 | 9  | 40223285  | 40266392  | protein_coding | 2,80 | 0,6142622 |
| ENSG00000163666 | HESX1     | 3  | 57197843  | 57226521  | protein_coding | 2,80 | 0,4463415 |
| ENSG00000064933 | PMS1      | 2  | 189784085 | 189877629 | protein_coding | 2,80 | 0,0037996 |
| ENSG00000118655 | DCLRE1B   | 1  | 113905141 | 113914086 | protein_coding | 2,79 | 0,0148097 |
| ENSG00000131044 | TTLL9     | 20 | 31870702  | 31944963  | protein_coding | 2,79 | 0,0012807 |
| ENSG00000157554 | ERG       | 21 | 38380027  | 38661780  | protein_coding | 2,79 | 0,0050271 |

|                 |            |    |           |           |                |      |           |
|-----------------|------------|----|-----------|-----------|----------------|------|-----------|
| ENSG00000100162 | CENPM      | 22 | 41938721  | 41947164  | protein_coding | 2,78 | 0,1168222 |
| ENSG00000148384 | INPP5E     | 9  | 136428619 | 136439822 | protein_coding | 2,78 | 0,0050271 |
| ENSG00000183091 | NEB        | 2  | 151485336 | 151734487 | protein_coding | 2,78 | 0,0793786 |
| ENSG00000204920 | ZNF155     | 19 | 43967862  | 43998325  | protein_coding | 2,78 | 0,0050271 |
| ENSG00000138279 | ANXA7      | 10 | 73375101  | 73414076  | protein_coding | 2,78 | 0,0025348 |
| ENSG00000047579 | DTNBP1     | 6  | 15522801  | 15663058  | protein_coding | 2,78 | 0,0012807 |
| ENSG00000130921 | C12orf65   | 12 | 123232916 | 123257959 | protein_coding | 2,77 | 0,1245284 |
| ENSG00000108733 | PEX12      | 17 | 35574795  | 35578863  | protein_coding | 2,77 | 0,0184474 |
| ENSG00000204116 | CHIC1      | X  | 73563200  | 73687102  | protein_coding | 2,77 | 0,2229774 |
| ENSG00000169918 | OTUD7A     | 15 | 31475398  | 31870789  | protein_coding | 2,76 | 0,2600087 |
| ENSG00000114739 | ACVR2B     | 3  | 38453851  | 38493142  | protein_coding | 2,76 | 0,0609506 |
| ENSG00000100276 | RASL10A    | 22 | 29312933  | 29319679  | protein_coding | 2,76 | 0,4307702 |
| ENSG00000183723 | CMTM4      | 16 | 66614750  | 66696707  | protein_coding | 2,75 | 0,0012807 |
| ENSG00000136141 | LRCH1      | 13 | 46553168  | 46753040  | protein_coding | 2,75 | 0,0000000 |
| ENSG00000108684 | ASIC2      | 17 | 33013087  | 34174964  | protein_coding | 2,75 | 0,0793786 |
| ENSG00000197579 | TOPORS     | 9  | 32540544  | 32552553  | protein_coding | 2,75 | 0,0995111 |
| ENSG00000169087 | HSPBAP1    | 3  | 122740003 | 122793824 | protein_coding | 2,74 | 0,0418702 |
| ENSG00000140600 | SH3GL3     | 15 | 83447228  | 83618743  | protein_coding | 2,74 | 0,0075075 |
| ENSG00000204147 | ASAH2B     | 10 | 50739318  | 50816495  | protein_coding | 2,74 | 0,0025348 |
| ENSG00000173914 | RBM4B      | 11 | 66664998  | 66677921  | protein_coding | 2,74 | 0,3785161 |
| ENSG00000196976 | LAGE3      | X  | 154477769 | 154479257 | protein_coding | 2,74 | 0,0050271 |
| ENSG00000166478 | ZNF143     | 11 | 9460319   | 9528524   | protein_coding | 2,74 | 0,0012807 |
| ENSG00000140368 | PSTPIP1    | 15 | 76993359  | 77037332  | protein_coding | 2,74 | 0,0538744 |
| ENSG00000185046 | ANKS1B     | 12 | 98726457  | 99984654  | protein_coding | 2,73 | 0,0075075 |
| ENSG00000184486 | POU3F2     | 6  | 98834592  | 98839490  | protein_coding | 2,73 | 0,0793786 |
| ENSG00000198740 | ZNF652     | 17 | 49289206  | 49362473  | protein_coding | 2,72 | 0,2725752 |
| ENSG00000211456 | SACM1L     | 3  | 45689056  | 45745424  | protein_coding | 2,71 | 0,0609506 |
| ENSG00000188001 | TPRG1      | 3  | 188947214 | 189325304 | protein_coding | 2,71 | 0,0012807 |
| ENSG00000133704 | IPO8       | 12 | 30628988  | 30695986  | protein_coding | 2,71 | 0,0000000 |
| ENSG00000172765 | TMCC1      | 3  | 129647792 | 129893576 | protein_coding | 2,71 | 0,0012807 |
| ENSG00000181472 | ZBTB2      | 6  | 151364117 | 151391548 | protein_coding | 2,71 | 0,0025348 |
| ENSG00000155827 | RNF20      | 9  | 101533851 | 101563344 | protein_coding | 2,71 | 0,1245284 |
| ENSG00000120526 | NUDCD1     | 8  | 109240919 | 109334385 | protein_coding | 2,71 | 0,0012807 |
| ENSG00000095585 | BLNK       | 10 | 96191702  | 96271587  | protein_coding | 2,71 | 0,0509539 |
| ENSG00000204389 | HSPA1A     | 6  | 31815464  | 31817946  | protein_coding | 2,71 | 0,0995111 |
| ENSG00000221947 | XKR9       | 8  | 70669365  | 70790371  | protein_coding | 2,71 | 0,3785161 |
| ENSG00000147257 | GPC3       | X  | 133535745 | 133985895 | protein_coding | 2,70 | 0,4999662 |
| ENSG00000150527 | CTAGE5     | 14 | 39265284  | 39388513  | protein_coding | 2,70 | 0,0025348 |
| ENSG00000279219 | ENSG000002 | 22 | 32191094  | 32191452  | protein_coding | 2,70 | 0,0025348 |
| ENSG00000187791 | FAM205C    | 9  | 34889064  | 34895778  | protein_coding | 2,70 | 0,3269660 |
| ENSG00000128872 | TMOD2      | 15 | 51751561  | 51816368  | protein_coding | 2,70 | 0,0037996 |
| ENSG00000244405 | ETV5       | 3  | 186046308 | 186110318 | protein_coding | 2,70 | 0,0111464 |
| ENSG00000189195 | BTBD8      | 1  | 92080305  | 92147836  | protein_coding | 2,70 | 0,2229774 |
| ENSG00000100027 | YPEL1      | 22 | 21697544  | 21735834  | protein_coding | 2,69 | 0,0050271 |
| ENSG00000141837 | CACNA1A    | 19 | 13206442  | 13623990  | protein_coding | 2,69 | 0,0418702 |
| ENSG00000124659 | TBCC       | 6  | 42744481  | 42746096  | protein_coding | 2,69 | 0,0793786 |
| ENSG00000178105 | DDX10      | 11 | 108665025 | 108940930 | protein_coding | 2,69 | 0,0995111 |
| ENSG00000006530 | AGK        | 7  | 141551189 | 141655244 | protein_coding | 2,69 | 0,0037996 |
| ENSG00000235631 | RNF148     | 7  | 122701664 | 122702967 | protein_coding | 2,69 | 0,5364729 |
| ENSG00000172059 | KLF11      | 2  | 10042849  | 10054836  | protein_coding | 2,68 | 0,0012807 |
| ENSG00000203724 | C1orf53    | 1  | 197902647 | 197907367 | protein_coding | 2,67 | 0,2229774 |
| ENSG00000119946 | CNNM1      | 10 | 99329099  | 99394330  | protein_coding | 2,67 | 0,0995111 |
| ENSG00000151320 | AKAP6      | 14 | 32329273  | 32837681  | protein_coding | 2,67 | 0,1598647 |
| ENSG00000168497 | SDPR       | 2  | 191834302 | 191847255 | protein_coding | 2,67 | 0,0050271 |
| ENSG00000278311 | GGNBP2     | 17 | 36544888  | 36589848  | protein_coding | 2,67 | 0,0609506 |

|                 |            |    |           |           |                |      |           |
|-----------------|------------|----|-----------|-----------|----------------|------|-----------|
| ENSG00000135148 | TRAFD1     | 12 | 112125501 | 112153609 | protein_coding | 2,67 | 0,0012807 |
| ENSG0000007038  | PRSS21     | 16 | 2817180   | 2826304   | protein_coding | 2,67 | 0,5736135 |
| ENSG00000100884 | CPNE6      | 14 | 24070837  | 24078100  | protein_coding | 2,67 | 0,3963183 |
| ENSG00000100246 | DNAL4      | 22 | 38778508  | 38794198  | protein_coding | 2,66 | 0,0148097 |
| ENSG00000198826 | ARHGAP11A  | 15 | 32615144  | 32639949  | protein_coding | 2,66 | 0,0012807 |
| ENSG0000008405  | CRY1       | 12 | 106991364 | 107093829 | protein_coding | 2,66 | 0,0012807 |
| ENSG00000055130 | CUL1       | 7  | 148697914 | 148801036 | protein_coding | 2,66 | 0,0012807 |
| ENSG00000157110 | RBPMS      | 8  | 30384479  | 30572261  | protein_coding | 2,66 | 0,0050271 |
| ENSG00000143498 | TAF1A      | 1  | 222557902 | 222589933 | protein_coding | 2,66 | 0,0037996 |
| ENSG00000169760 | NLGN1      | 3  | 173396284 | 174286644 | protein_coding | 2,66 | 0,0075075 |
| ENSG00000155085 | AK9        | 6  | 109492856 | 109691217 | protein_coding | 2,65 | 0,0148097 |
| ENSG00000034693 | PEX3       | 6  | 143450807 | 143490010 | protein_coding | 2,65 | 0,5736135 |
| ENSG00000185774 | KCNIP4     | 4  | 20728616  | 21948799  | protein_coding | 2,65 | 0,0148097 |
| ENSG00000106588 | PSMA2      | 7  | 42916857  | 42932223  | protein_coding | 2,64 | 0,4307702 |
| ENSG00000186446 | ZNF501     | 3  | 44729596  | 44737083  | protein_coding | 2,64 | 0,0012807 |
| ENSG00000152409 | JMY        | 5  | 79236189  | 79327215  | protein_coding | 2,64 | 0,0012807 |
| ENSG00000149929 | HIRIP3     | 16 | 29992321  | 29996436  | protein_coding | 2,64 | 0,0257457 |
| ENSG00000144644 | GADL1      | 3  | 30726200  | 30894765  | protein_coding | 2,64 | 0,2229774 |
| ENSG00000107951 | MTPAP      | 10 | 30309801  | 30374448  | protein_coding | 2,63 | 0,0257457 |
| ENSG00000086619 | ERO1B      | 1  | 236215555 | 236281985 | protein_coding | 2,63 | 0,0995111 |
| ENSG00000143858 | SYT2       | 1  | 202590596 | 202710417 | protein_coding | 2,63 | 0,0075075 |
| ENSG00000100906 | NFKBIA     | 14 | 35401511  | 35404749  | protein_coding | 2,62 | 0,0025348 |
| ENSG0000010318  | PHF7       | 3  | 52410561  | 52423641  | protein_coding | 2,62 | 0,0105771 |
| ENSG00000125245 | GPR18      | 13 | 99254714  | 99261744  | protein_coding | 2,62 | 0,1867869 |
| ENSG00000075429 | CACNG5     | 17 | 66835117  | 66885486  | protein_coding | 2,62 | 0,5364729 |
| ENSG00000152454 | ZNF256     | 19 | 57940833  | 57947675  | protein_coding | 2,61 | 0,0037996 |
| ENSG00000160404 | TOR2A      | 9  | 127731524 | 127735317 | protein_coding | 2,61 | 0,0335607 |
| ENSG00000119698 | PPP4R4     | 14 | 94146128  | 94279735  | protein_coding | 2,61 | 0,0050271 |
| ENSG00000133884 | DPF2       | 11 | 65333754  | 65353249  | protein_coding | 2,60 | 0,0025348 |
| ENSG00000274391 | TPTE       | 21 | 10521553  | 10606140  | protein_coding | 2,60 | 0,6142622 |
| ENSG00000161652 | IZUMO2     | 19 | 50152548  | 50163195  | protein_coding | 2,60 | 0,6142622 |
| ENSG00000178690 | DYNAP      | 18 | 54587757  | 54599493  | protein_coding | 2,60 | 0,3269660 |
| ENSG00000188716 | DUPD1      | 10 | 75037836  | 75058514  | protein_coding | 2,60 | 0,6142622 |
| ENSG00000171855 | IFNB1      | 9  | 21077105  | 21077963  | protein_coding | 2,60 | 0,0111464 |
| ENSG00000173612 | GPRC6A     | 6  | 116792085 | 116829037 | protein_coding | 2,60 | 0,3269660 |
| ENSG00000263020 | ENSG000002 | 6  | 31666102  | 31673546  | protein_coding | 2,60 | 0,1245284 |
| ENSG00000169783 | LINGO1     | 15 | 77613027  | 77820900  | protein_coding | 2,60 | 0,6606414 |
| ENSG00000158411 | MITD1      | 2  | 99161427  | 99181058  | protein_coding | 2,60 | 0,0717418 |
| ENSG00000145819 | ARHGAP26   | 5  | 142770384 | 143229011 | protein_coding | 2,59 | 0,0012807 |
| ENSG00000049759 | NEDD4L     | 18 | 58044367  | 58401540  | protein_coding | 2,59 | 0,0025348 |
| ENSG0000008324  | SS18L2     | 3  | 42581840  | 42595114  | protein_coding | 2,59 | 0,0111464 |
| ENSG00000113593 | PPWD1      | 5  | 65563236  | 65587549  | protein_coding | 2,59 | 0,4463415 |
| ENSG00000141639 | MAPK4      | 18 | 50560078  | 50731824  | protein_coding | 2,59 | 0,0012807 |
| ENSG00000092036 | HAUS4      | 14 | 22946228  | 22957161  | protein_coding | 2,59 | 0,2725752 |
| ENSG00000187231 | SESTD1     | 2  | 179101692 | 179264790 | protein_coding | 2,58 | 0,0418702 |
| ENSG00000105641 | SLC5A5     | 19 | 17871973  | 17895174  | protein_coding | 2,58 | 0,3096079 |
| ENSG00000188243 | COMMD6     | 13 | 75525219  | 75549439  | protein_coding | 2,58 | 0,0995111 |
| ENSG00000206559 | ZCWPW2     | 3  | 28349146  | 28538122  | protein_coding | 2,58 | 0,0609506 |
| ENSG00000205456 | TP53TG3D   | 16 | 32252719  | 32255922  | protein_coding | 2,57 | 0,0586426 |
| ENSG00000197943 | PLCG2      | 16 | 81739097  | 81962693  | protein_coding | 2,57 | 0,0418702 |
| ENSG00000116830 | TTF2       | 1  | 117060303 | 117107453 | protein_coding | 2,56 | 0,2725752 |
| ENSG00000075702 | WDR62      | 19 | 36054881  | 36105106  | protein_coding | 2,55 | 0,0335607 |
| ENSG00000105072 | C19orf44   | 19 | 16496311  | 16521352  | protein_coding | 2,55 | 0,0012807 |
| ENSG00000140009 | ESR2       | 14 | 64084232  | 64338112  | protein_coding | 2,55 | 0,0105771 |
| ENSG00000127564 | PKMYT1     | 16 | 2968024   | 2980539   | protein_coding | 2,55 | 0,0586426 |



|                 |         |    |           |           |                |      |           |
|-----------------|---------|----|-----------|-----------|----------------|------|-----------|
| ENSG00000152128 | TMEM163 | 2  | 134455759 | 134719000 | protein_coding | 2,55 | 0,0012807 |
| ENSG00000101138 | CSTF1   | 20 | 56392371  | 56406369  | protein_coding | 2,54 | 0,0012807 |
| ENSG00000115295 | CLIP4   | 2  | 29097705  | 29189643  | protein_coding | 2,54 | 0,0335607 |
| ENSG00000140463 | BBS4    | 15 | 72686179  | 72738476  | protein_coding | 2,54 | 0,0012807 |
| ENSG00000066651 | TRMT11  | 6  | 125986430 | 126039276 | protein_coding | 2,54 | 0,0418702 |
| ENSG00000054392 | HHAT    | 1  | 210328252 | 210676296 | protein_coding | 2,54 | 0,0012807 |
| ENSG00000168038 | ULK4    | 3  | 41246599  | 41962430  | protein_coding | 2,53 | 0,0050271 |
| ENSG00000196683 | TOMM7   | 7  | 22812628  | 22822852  | protein_coding | 2,53 | 0,0050271 |
| ENSG00000157578 | LCA5L   | 21 | 39405844  | 39445805  | protein_coding | 2,53 | 0,0335607 |
| ENSG00000144619 | CNTN4   | 3  | 2098813   | 3057956   | protein_coding | 2,53 | 0,0184474 |
| ENSG00000128918 | ALDH1A2 | 15 | 57953424  | 58497866  | protein_coding | 2,53 | 0,0012807 |
| ENSG00000181915 | ADO     | 10 | 62804857  | 62808483  | protein_coding | 2,53 | 0,3269660 |
| ENSG00000103540 | CCP110  | 16 | 19523811  | 19553408  | protein_coding | 2,52 | 0,0075075 |
| ENSG00000171475 | WIPF2   | 17 | 40219304  | 40284136  | protein_coding | 2,52 | 0,1775672 |
| ENSG00000120262 | CCDC170 | 6  | 151494030 | 151621193 | protein_coding | 2,51 | 0,0184474 |
| ENSG00000164707 | SLC13A4 | 7  | 135681237 | 135729258 | protein_coding | 2,51 | 0,1488645 |
| ENSG00000144485 | HES6    | 2  | 238238267 | 238240662 | protein_coding | 2,51 | 0,0335607 |
| ENSG00000125851 | PCSK2   | 20 | 17226107  | 17484578  | protein_coding | 2,50 | 0,3269660 |
| ENSG00000134538 | SLCO1B1 | 12 | 21131202  | 21239246  | protein_coding | 2,50 | 0,1245284 |
| ENSG00000108018 | SORCS1  | 10 | 106573663 | 107164534 | protein_coding | 2,50 | 0,0062591 |
| ENSG00000082458 | DLG3    | X  | 70444861  | 70505490  | protein_coding | 2,50 | 0,0111464 |
| ENSG00000177981 | ASB8    | 12 | 48147788  | 48181213  | protein_coding | 2,49 | 0,0538744 |
| ENSG00000132849 | INADL   | 1  | 61742477  | 62178675  | protein_coding | 2,49 | 0,0037996 |
| ENSG00000146592 | CREB5   | 7  | 28299321  | 28825894  | protein_coding | 2,49 | 0,0025348 |
| ENSG00000118496 | FBXO30  | 6  | 145793502 | 145814753 | protein_coding | 2,49 | 0,4463415 |
| ENSG00000182963 | GJC1    | 17 | 44798448  | 44830816  | protein_coding | 2,49 | 0,0793786 |
| ENSG00000009780 | FAM76A  | 1  | 27725979  | 27763122  | protein_coding | 2,49 | 0,0335607 |
| ENSG00000132388 | UBE2G1  | 17 | 4269259   | 4366628   | protein_coding | 2,49 | 0,3963183 |
| ENSG00000120334 | CENPL   | 1  | 173799550 | 173824720 | protein_coding | 2,49 | 0,0111464 |
| ENSG00000156787 | TBC1D31 | 8  | 123041968 | 123152153 | protein_coding | 2,49 | 0,0012807 |
| ENSG00000214595 | EML6    | 2  | 54723499  | 54972025  | protein_coding | 2,48 | 0,0012807 |
| ENSG00000144677 | CTDSPL  | 3  | 37861960  | 37984469  | protein_coding | 2,48 | 0,3269660 |
| ENSG00000151651 | ADAM8   | 10 | 133262403 | 133276868 | protein_coding | 2,48 | 0,0335607 |
| ENSG00000163754 | GYG1    | 3  | 148991341 | 149027668 | protein_coding | 2,48 | 0,0050271 |
| ENSG00000181007 | ZFP82   | 19 | 36383120  | 36418656  | protein_coding | 2,48 | 0,0025348 |
| ENSG00000133069 | TMCC2   | 1  | 205228176 | 205273343 | protein_coding | 2,48 | 0,0111464 |
| ENSG00000103044 | HAS3    | 16 | 69105564  | 69118719  | protein_coding | 2,48 | 0,0148097 |
| ENSG00000173275 | ZNF449  | X  | 135344796 | 135363152 | protein_coding | 2,48 | 0,0257457 |
| ENSG00000159593 | NAE1    | 16 | 66802875  | 66873256  | protein_coding | 2,47 | 0,1245284 |
| ENSG00000170293 | CMTM8   | 3  | 32238679  | 32370325  | protein_coding | 2,47 | 0,0012807 |
| ENSG00000156298 | TSPAN7  | X  | 38561370  | 38688920  | protein_coding | 2,47 | 0,0335607 |
| ENSG00000066185 | ZMYND12 | 1  | 42430329  | 42456267  | protein_coding | 2,46 | 0,0538744 |
| ENSG00000171649 | ZIK1    | 19 | 57578456  | 57593777  | protein_coding | 2,46 | 0,0148097 |
| ENSG00000141552 | ANAPC11 | 17 | 81890790  | 81900991  | protein_coding | 2,46 | 0,0995111 |
| ENSG00000138587 | MNS1    | 15 | 56421544  | 56465137  | protein_coding | 2,46 | 0,4999662 |
| ENSG00000248383 | PCDHAC1 | 5  | 140926369 | 141012344 | protein_coding | 2,46 | 0,1488645 |
| ENSG00000171772 | SYCE1   | 10 | 133553901 | 133569835 | protein_coding | 2,45 | 0,3096079 |
| ENSG00000198515 | CNGA1   | 4  | 47935977  | 48016672  | protein_coding | 2,45 | 0,5364729 |
| ENSG00000119929 | CUTC    | 10 | 99702558  | 99756134  | protein_coding | 2,45 | 0,0418702 |
| ENSG00000219438 | FAM19A5 | 22 | 48489460  | 48850912  | protein_coding | 2,45 | 0,0793786 |
| ENSG00000110958 | PTGES3  | 12 | 56663341  | 56688408  | protein_coding | 2,45 | 0,0609506 |
| ENSG00000117643 | MAN1C1  | 1  | 25617468  | 25786207  | protein_coding | 2,44 | 0,1598647 |
| ENSG00000115368 | WDR75   | 2  | 189441433 | 189475565 | protein_coding | 2,44 | 0,0111464 |
| ENSG00000122870 | BICC1   | 10 | 58513140  | 58831437  | protein_coding | 2,44 | 0,0793786 |
| ENSG00000204815 | TTC25   | 17 | 41930635  | 41965651  | protein_coding | 2,44 | 0,4999662 |

|                 |           |    |           |           |                |      |           |
|-----------------|-----------|----|-----------|-----------|----------------|------|-----------|
| ENSG00000110700 | RPS13     | 11 | 17074389  | 17077787  | protein_coding | 2,43 | 0,0793786 |
| ENSG00000153006 | SREK1IP1  | 5  | 64718144  | 64768685  | protein_coding | 2,43 | 0,0995111 |
| ENSG00000131196 | NFATC1    | 18 | 79395856  | 79529325  | protein_coding | 2,43 | 0,0418702 |
| ENSG00000118160 | SLC8A2    | 19 | 47428017  | 47472168  | protein_coding | 2,42 | 0,1168222 |
| ENSG00000180061 | TMEM150B  | 19 | 55312801  | 55334048  | protein_coding | 2,42 | 0,5364729 |
| ENSG00000100784 | RPS6KA5   | 14 | 90847862  | 91060636  | protein_coding | 2,42 | 0,0257457 |
| ENSG00000072864 | NDE1      | 16 | 15643267  | 15726353  | protein_coding | 2,41 | 0,2725752 |
| ENSG00000163995 | ABLIM2    | 4  | 7965310   | 8158832   | protein_coding | 2,41 | 0,0609506 |
| ENSG00000172995 | ARPP21    | 3  | 35638945  | 35794496  | protein_coding | 2,40 | 0,1775672 |
| ENSG00000205268 | PDE7A     | 8  | 65717510  | 65842322  | protein_coding | 2,40 | 0,0025348 |
| ENSG00000186509 | OR9Q1     | 11 | 58023881  | 58181616  | protein_coding | 2,40 | 0,6142622 |
| ENSG00000163746 | PLSCR2    | 3  | 146391421 | 146495991 | protein_coding | 2,40 | 0,3269660 |
| ENSG00000071677 | PRLH      | 2  | 237566574 | 237567175 | protein_coding | 2,40 | 0,6142622 |
| ENSG00000174306 | ZHX3      | 20 | 41178448  | 41317672  | protein_coding | 2,40 | 0,0609506 |
| ENSG00000051180 | RAD51     | 15 | 40694774  | 40732339  | protein_coding | 2,40 | 0,0062591 |
| ENSG00000138028 | CGREF1    | 2  | 27098889  | 27119115  | protein_coding | 2,40 | 0,1598647 |
| ENSG00000232040 | ZBED9     | 6  | 28571630  | 28616212  | protein_coding | 2,39 | 0,0037996 |
| ENSG00000154429 | CCSAP     | 1  | 229321005 | 229343294 | protein_coding | 2,39 | 0,0995111 |
| ENSG00000143156 | NME7      | 1  | 169132531 | 169367967 | protein_coding | 2,38 | 0,3963183 |
| ENSG00000163492 | CCDC141   | 2  | 178829757 | 179050086 | protein_coding | 2,38 | 0,0335607 |
| ENSG00000077943 | ITGA8     | 10 | 15513949  | 15720125  | protein_coding | 2,38 | 0,0184474 |
| ENSG00000031691 | CENPQ     | 6  | 49463378  | 49493107  | protein_coding | 2,38 | 0,2725752 |
| ENSG00000182253 | SYNM      | 15 | 99098217  | 99135593  | protein_coding | 2,37 | 0,2229774 |
| ENSG00000164919 | COX6C     | 8  | 99873200  | 99894062  | protein_coding | 2,37 | 0,2229774 |
| ENSG00000213988 | ZNF90     | 19 | 20077994  | 20127076  | protein_coding | 2,37 | 0,0037996 |
| ENSG00000165995 | CACNB2    | 10 | 18140677  | 18541869  | protein_coding | 2,36 | 0,5736135 |
| ENSG00000151150 | ANK3      | 10 | 60026298  | 60733490  | protein_coding | 2,36 | 0,0538744 |
| ENSG00000107295 | SH3GL2    | 9  | 17579082  | 17797129  | protein_coding | 2,36 | 0,1598647 |
| ENSG00000125351 | UPF3B     | X  | 119834022 | 119852998 | protein_coding | 2,36 | 0,0793786 |
| ENSG00000047346 | FAM214A   | 15 | 52581317  | 52709817  | protein_coding | 2,36 | 0,0111464 |
| ENSG00000155011 | DKK2      | 4  | 106921802 | 107283806 | protein_coding | 2,36 | 0,0586426 |
| ENSG00000131462 | TUBG1     | 17 | 42609676  | 42615234  | protein_coding | 2,36 | 0,0037996 |
| ENSG00000118997 | DNAH7     | 2  | 195737703 | 196068812 | protein_coding | 2,36 | 0,0184474 |
| ENSG00000021300 | PLEKHB1   | 11 | 73646178  | 73662819  | protein_coding | 2,35 | 0,0111464 |
| ENSG00000023330 | ALAS1     | 3  | 52198086  | 52214327  | protein_coding | 2,35 | 0,0335607 |
| ENSG00000101871 | MID1      | X  | 10445310  | 10833654  | protein_coding | 2,35 | 0,0025348 |
| ENSG00000171316 | CHD7      | 8  | 60678778  | 60868028  | protein_coding | 2,34 | 0,1245284 |
| ENSG00000205659 | LIN52     | 14 | 74084796  | 74201235  | protein_coding | 2,33 | 0,1598647 |
| ENSG00000212935 | KRTAP10-3 | 21 | 44557790  | 44558760  | protein_coding | 2,33 | 0,0995111 |
| ENSG00000174990 | CA5A      | 16 | 87881546  | 87936529  | protein_coding | 2,33 | 0,1488645 |
| ENSG00000204538 | PSORS1C2  | 6  | 31137536  | 31139350  | protein_coding | 2,33 | 0,3269660 |
| ENSG00000185055 | EFCAB10   | 7  | 105565120 | 105600875 | protein_coding | 2,33 | 0,0075075 |
| ENSG00000144730 | IL17RD    | 3  | 57089982  | 57170306  | protein_coding | 2,33 | 0,0012807 |
| ENSG00000130255 | RPL36     | 19 | 5674947   | 5691876   | protein_coding | 2,33 | 0,0257457 |
| ENSG00000196116 | TDRD7     | 9  | 97411950  | 97496125  | protein_coding | 2,33 | 0,0037996 |
| ENSG00000010810 | FYN       | 6  | 111660332 | 111873452 | protein_coding | 2,33 | 0,2229774 |
| ENSG00000276234 | TADA2A    | 17 | 37406874  | 37479730  | protein_coding | 2,32 | 0,0609506 |
| ENSG00000181773 | GPR3      | 1  | 27392644  | 27395814  | protein_coding | 2,32 | 0,0609506 |
| ENSG00000120539 | MASTL     | 10 | 27154824  | 27186924  | protein_coding | 2,32 | 0,0184474 |
| ENSG00000132964 | CDK8      | 13 | 26254104  | 26405238  | protein_coding | 2,32 | 0,0257457 |
| ENSG00000070886 | EPHA8     | 1  | 22563564  | 22603594  | protein_coding | 2,31 | 0,4307702 |
| ENSG00000147854 | UHRF2     | 9  | 6413151   | 6507054   | protein_coding | 2,30 | 0,0257457 |
| ENSG00000049656 | CLPTM1L   | 5  | 1317744   | 1345099   | protein_coding | 2,30 | 0,0148097 |
| ENSG00000070814 | TCOF1     | 5  | 150357639 | 150400308 | protein_coding | 2,30 | 0,4463415 |
| ENSG00000108468 | CBX1      | 17 | 48070052  | 48101521  | protein_coding | 2,30 | 0,0335607 |

|                 |          |    |           |           |                |      |           |
|-----------------|----------|----|-----------|-----------|----------------|------|-----------|
| ENSG00000128253 | RFPL2    | 22 | 32190435  | 32203477  | protein_coding | 2,30 | 0,6702615 |
| ENSG00000163286 | ALPLL2   | 2  | 232406843 | 232410714 | protein_coding | 2,30 | 0,3269660 |
| ENSG00000148053 | NTRK2    | 9  | 84668551  | 85027070  | protein_coding | 2,29 | 0,0111464 |
| ENSG00000128487 | SPECC1   | 17 | 20009344  | 20319026  | protein_coding | 2,29 | 0,0025348 |
| ENSG00000121073 | SLC35B1  | 17 | 49700943  | 49709014  | protein_coding | 2,29 | 0,0037996 |
| ENSG00000106052 | TAX1BP1  | 7  | 27739331  | 27844564  | protein_coding | 2,29 | 0,0418702 |
| ENSG00000249222 | ATP5L2   | 22 | 42639803  | 42640601  | protein_coding | 2,29 | 0,6003007 |
| ENSG00000215182 | MUC5AC   | 11 | 1157953   | 1201138   | protein_coding | 2,29 | 0,3096079 |
| ENSG00000130559 | CAMSAP1  | 9  | 135808487 | 135907228 | protein_coding | 2,28 | 0,0012807 |
| ENSG00000204947 | ZNF425   | 7  | 149102784 | 149126346 | protein_coding | 2,28 | 0,1598647 |
| ENSG00000058272 | PPP1R12A | 12 | 79773563  | 79935460  | protein_coding | 2,28 | 0,0538744 |
| ENSG00000005194 | CIAPIN1  | 16 | 57428169  | 57447528  | protein_coding | 2,27 | 0,0025348 |
| ENSG00000140873 | ADAMTS18 | 16 | 77247813  | 77435114  | protein_coding | 2,27 | 0,0075075 |
| ENSG00000125482 | TTF1     | 9  | 132375548 | 132406851 | protein_coding | 2,27 | 0,0609506 |
| ENSG00000100711 | ZFYVE21  | 14 | 103715730 | 103733668 | protein_coding | 2,27 | 0,0050271 |
| ENSG00000115112 | TFCP2L1  | 2  | 121216587 | 121285207 | protein_coding | 2,26 | 0,1245284 |
| ENSG00000155858 | LSM11    | 5  | 157743695 | 157760709 | protein_coding | 2,26 | 0,2725752 |
| ENSG00000113319 | RASGRF2  | 5  | 80960672  | 81230156  | protein_coding | 2,26 | 0,0050271 |
| ENSG00000186472 | PCLO     | 7  | 82754013  | 83162930  | protein_coding | 2,26 | 0,0012807 |
| ENSG00000144868 | TMEM108  | 3  | 133038391 | 133397792 | protein_coding | 2,25 | 0,0793786 |
| ENSG00000006128 | TAC1     | 7  | 97731908  | 97740472  | protein_coding | 2,25 | 0,3963183 |
| ENSG00000139354 | GAS2L3   | 12 | 100573683 | 100628286 | protein_coding | 2,25 | 0,6702615 |
| ENSG00000136161 | RCBTB2   | 13 | 48488959  | 48533256  | protein_coding | 2,25 | 0,0257457 |
| ENSG00000143353 | LYPLAL1  | 1  | 219173844 | 219212865 | protein_coding | 2,24 | 0,2725752 |
| ENSG00000204390 | HSPA1L   | 6  | 31809619  | 31815065  | protein_coding | 2,24 | 0,6606414 |
| ENSG00000184983 | NDUFA6   | 22 | 42085525  | 42090955  | protein_coding | 2,24 | 0,2725752 |
| ENSG00000126246 | IGFLR1   | 19 | 35738801  | 35742453  | protein_coding | 2,24 | 0,0148097 |
| ENSG00000138964 | PARVG    | 22 | 44172956  | 44219533  | protein_coding | 2,24 | 0,0075075 |
| ENSG00000188396 | TCTEX1D4 | 1  | 44805913  | 44806675  | protein_coding | 2,24 | 0,0075075 |
| ENSG00000105732 | ZNF574   | 19 | 42068477  | 42081565  | protein_coding | 2,24 | 0,3963183 |
| ENSG00000213190 | MLLT11   | 1  | 151057758 | 151068497 | protein_coding | 2,23 | 0,0793786 |
| ENSG00000171056 | SOX7     | 8  | 10723768  | 10730512  | protein_coding | 2,23 | 0,0586426 |
| ENSG00000145416 | 01-mars  | 4  | 163524298 | 164384050 | protein_coding | 2,22 | 0,0418702 |
| ENSG00000109445 | ZNF330   | 4  | 141220887 | 141234697 | protein_coding | 2,22 | 0,0184474 |
| ENSG00000156574 | NODAL    | 10 | 70432315  | 70447951  | protein_coding | 2,22 | 0,0995111 |
| ENSG00000168890 | TMEM150A | 2  | 85598548  | 85603196  | protein_coding | 2,22 | 0,0075075 |
| ENSG00000121989 | ACVR2A   | 2  | 147844517 | 147930826 | protein_coding | 2,22 | 0,0025348 |
| ENSG00000205209 | SCGB2B2  | 19 | 34593329  | 34675699  | protein_coding | 2,22 | 0,6702615 |
| ENSG00000152689 | RASGRP3  | 2  | 33436324  | 33564750  | protein_coding | 2,22 | 0,0075075 |
| ENSG00000076321 | KLHL20   | 1  | 173714941 | 173786702 | protein_coding | 2,21 | 0,0538744 |
| ENSG00000112149 | CD83     | 6  | 14117256  | 14136918  | protein_coding | 2,21 | 0,0184474 |
| ENSG00000107249 | GLIS3    | 9  | 3824127   | 4348392   | protein_coding | 2,21 | 0,3269660 |
| ENSG00000100473 | COCH     | 14 | 30874514  | 30895065  | protein_coding | 2,21 | 0,0609506 |
| ENSG00000175093 | SPSB4    | 3  | 141051402 | 141148611 | protein_coding | 2,21 | 0,6003007 |
| ENSG00000173013 | CCDC96   | 4  | 7040849   | 7042939   | protein_coding | 2,21 | 0,2600087 |
| ENSG00000197472 | ZNF695   | 1  | 246945547 | 247008093 | protein_coding | 2,21 | 0,2725752 |
| ENSG00000108244 | KRT23    | 17 | 40922696  | 40937634  | protein_coding | 2,21 | 0,4999662 |
| ENSG00000164713 | BRI3     | 7  | 98252379  | 98310441  | protein_coding | 2,21 | 0,0335607 |
| ENSG00000163521 | GLB1L    | 2  | 219236606 | 219245478 | protein_coding | 2,20 | 0,0793786 |
| ENSG00000196646 | ZNF136   | 19 | 12163064  | 12189881  | protein_coding | 2,20 | 0,5736135 |
| ENSG00000187689 | AMTN     | 4  | 70518540  | 70532742  | protein_coding | 2,20 | 0,6142622 |
| ENSG00000114204 | SERPINI2 | 3  | 167441789 | 167479004 | protein_coding | 2,20 | 0,1245284 |
| ENSG00000066583 | ISOC1    | 5  | 129094751 | 129114028 | protein_coding | 2,20 | 0,0995111 |
| ENSG00000128242 | GAL3ST1  | 22 | 30554635  | 30574587  | protein_coding | 2,19 | 0,1488645 |
| ENSG00000152380 | FAM151B  | 5  | 80487969  | 80542563  | protein_coding | 2,19 | 0,4999662 |

|                 |          |    |           |           |                |      |           |
|-----------------|----------|----|-----------|-----------|----------------|------|-----------|
| ENSG00000182117 | NOP10    | 15 | 34341713  | 34343177  | protein_coding | 2,19 | 0,0538744 |
| ENSG00000166526 | ZNF3     | 7  | 100064033 | 100082548 | protein_coding | 2,19 | 0,0148097 |
| ENSG00000105649 | RAB3A    | 19 | 18196784  | 18204074  | protein_coding | 2,18 | 0,0148097 |
| ENSG00000125703 | ATG4C    | 1  | 62784135  | 62865513  | protein_coding | 2,18 | 0,4999662 |
| ENSG00000141384 | TAF4B    | 18 | 26225936  | 26391685  | protein_coding | 2,18 | 0,3963183 |
| ENSG00000153574 | RPIA     | 2  | 88691644  | 88750935  | protein_coding | 2,18 | 0,0538744 |
| ENSG00000158423 | RIBC1    | X  | 53422690  | 53431120  | protein_coding | 2,18 | 0,4808196 |
| ENSG00000112592 | TBP      | 6  | 170554302 | 170572870 | protein_coding | 2,18 | 0,0062591 |
| ENSG00000169758 | TMEM266  | 15 | 76059837  | 76229121  | protein_coding | 2,17 | 0,2127456 |
| ENSG00000135972 | MRPS9    | 2  | 105037983 | 105099960 | protein_coding | 2,17 | 0,0037996 |
| ENSG00000039560 | RAI14    | 5  | 34656237  | 34832627  | protein_coding | 2,17 | 0,0037996 |
| ENSG00000183647 | ZNF530   | 19 | 57599885  | 57612722  | protein_coding | 2,17 | 0,6899576 |
| ENSG00000116213 | WRAP73   | 1  | 3630767   | 3652761   | protein_coding | 2,17 | 0,0257457 |
| ENSG00000214941 | ZSWIM7   | 17 | 15976560  | 15999717  | protein_coding | 2,16 | 0,0418702 |
| ENSG00000119688 | ABCD4    | 14 | 74285423  | 74303056  | protein_coding | 2,16 | 0,0335607 |
| ENSG00000101040 | ZMYND8   | 20 | 47209214  | 47356889  | protein_coding | 2,16 | 0,2725752 |
| ENSG00000196368 | NUDT11   | X  | 51490011  | 51496596  | protein_coding | 2,16 | 0,0300092 |
| ENSG00000151693 | ASAP2    | 2  | 9206765   | 9405683   | protein_coding | 2,16 | 0,0586426 |
| ENSG00000140153 | WDR20    | 14 | 102139503 | 102224847 | protein_coding | 2,15 | 0,0075075 |
| ENSG00000169876 | MUC17    | 7  | 101020072 | 101058745 | protein_coding | 2,15 | 0,3096079 |
| ENSG00000124126 | PREX1    | 20 | 48624252  | 48827883  | protein_coding | 2,15 | 0,3963183 |
| ENSG00000164002 | EXO5     | 1  | 40508741  | 40516556  | protein_coding | 2,15 | 0,0184474 |
| ENSG00000176927 | EFCAB5   | 17 | 29929200  | 30108452  | protein_coding | 2,15 | 0,2127456 |
| ENSG00000136940 | PDCL     | 9  | 122798389 | 122828631 | protein_coding | 2,15 | 0,0012807 |
| ENSG00000168350 | DEGS2    | 14 | 100143957 | 100160163 | protein_coding | 2,15 | 0,4307702 |
| ENSG00000183439 | TRIM61   | 4  | 164954446 | 164977668 | protein_coding | 2,14 | 0,1168222 |
| ENSG00000187815 | ZFP69    | 1  | 40477215  | 40496343  | protein_coding | 2,14 | 0,0257457 |
| ENSG00000111596 | CNOT2    | 12 | 70242994  | 70354993  | protein_coding | 2,14 | 0,1867869 |
| ENSG00000171960 | PPIH     | 1  | 42658425  | 42676758  | protein_coding | 2,14 | 0,0995111 |
| ENSG00000129071 | MBD4     | 3  | 129430944 | 129440179 | protein_coding | 2,14 | 0,0111464 |
| ENSG00000106443 | PHF14    | 7  | 10973872  | 11169630  | protein_coding | 2,14 | 0,0609506 |
| ENSG00000169612 | FAM103A1 | 15 | 82986207  | 82991057  | protein_coding | 2,13 | 0,0609506 |
| ENSG00000137656 | BUD13    | 11 | 116748170 | 116772988 | protein_coding | 2,13 | 0,0025348 |
| ENSG00000078304 | PPP2R5C  | 14 | 101761798 | 101927989 | protein_coding | 2,13 | 0,0184474 |
| ENSG00000140807 | NKD1     | 16 | 50548330  | 50640739  | protein_coding | 2,12 | 0,0012807 |
| ENSG00000117697 | NSL1     | 1  | 212726153 | 212791782 | protein_coding | 2,12 | 0,0418702 |
| ENSG00000162976 | PQLC3    | 2  | 11155198  | 11178874  | protein_coding | 2,12 | 0,4999662 |
| ENSG00000065675 | PRKCQ    | 10 | 6427143   | 6580301   | protein_coding | 2,12 | 0,0075075 |
| ENSG00000136960 | ENPP2    | 8  | 119557086 | 119673453 | protein_coding | 2,12 | 0,0257457 |
| ENSG00000070018 | LRP6     | 12 | 12116025  | 12267012  | protein_coding | 2,12 | 0,0793786 |
| ENSG00000076641 | PAG1     | 8  | 80967810  | 81112068  | protein_coding | 2,11 | 0,0538744 |
| ENSG00000229859 | PGA3     | 11 | 61203307  | 61213098  | protein_coding | 2,11 | 0,3785161 |
| ENSG00000106993 | CDC37L1  | 9  | 4679559   | 4708398   | protein_coding | 2,11 | 0,0111464 |
| ENSG00000110002 | VWA5A    | 11 | 124115362 | 124147721 | protein_coding | 2,11 | 0,0012807 |
| ENSG00000187109 | NAP1L1   | 12 | 76036587  | 76085033  | protein_coding | 2,11 | 0,2229774 |
| ENSG00000183134 | PTGDR2   | 11 | 60850940  | 60855971  | protein_coding | 2,10 | 0,4307702 |
| ENSG00000187258 | NPSR1    | 7  | 34658239  | 34878332  | protein_coding | 2,10 | 0,0418702 |
| ENSG00000278637 | HIST1H4A | 6  | 26021679  | 26021990  | protein_coding | 2,10 | 0,3269660 |
| ENSG00000088726 | TMEM40   | 3  | 12733525  | 12769457  | protein_coding | 2,10 | 0,6142622 |
| ENSG00000020922 | MRE11A   | 11 | 94415578  | 94493908  | protein_coding | 2,10 | 0,0418702 |
| ENSG00000086475 | SEPHS1   | 10 | 13317424  | 13348298  | protein_coding | 2,10 | 0,0050271 |
| ENSG00000158417 | EIF5B    | 2  | 99337353  | 99401326  | protein_coding | 2,10 | 0,0184474 |
| ENSG00000171827 | ZNF570   | 19 | 37467585  | 37488652  | protein_coding | 2,10 | 0,0062591 |
| ENSG00000126216 | TUBGCP3  | 13 | 112485005 | 112588167 | protein_coding | 2,10 | 0,0012807 |
| ENSG00000101146 | RAE1     | 20 | 57351010  | 57379211  | protein_coding | 2,09 | 0,0062591 |

|                 |          |    |           |           |                |      |           |
|-----------------|----------|----|-----------|-----------|----------------|------|-----------|
| ENSG00000138101 | DTNB     | 2  | 25377198  | 25673647  | protein_coding | 2,09 | 0,0111464 |
| ENSG00000204524 | ZNF805   | 19 | 57240685  | 57255135  | protein_coding | 2,09 | 0,0184474 |
| ENSG00000138395 | CDK15    | 2  | 201790461 | 201895550 | protein_coding | 2,09 | 0,0538744 |
| ENSG00000118276 | B4GALT6  | 18 | 31622247  | 31685836  | protein_coding | 2,09 | 0,2229774 |
| ENSG00000152049 | KCNE4    | 2  | 223051814 | 223198399 | protein_coding | 2,08 | 0,4999662 |
| ENSG00000163026 | C2orf44  | 2  | 24029340  | 24049575  | protein_coding | 2,08 | 0,0995111 |
| ENSG00000138286 | FAM149B1 | 10 | 73168166  | 73244504  | protein_coding | 2,08 | 0,2725752 |
| ENSG00000197168 | NEK5     | 13 | 52033611  | 52129078  | protein_coding | 2,08 | 0,0111464 |
| ENSG00000255150 | EID3     | 12 | 104303739 | 104305202 | protein_coding | 2,07 | 0,0062591 |
| ENSG00000107485 | GATA3    | 10 | 8053604   | 8075198   | protein_coding | 2,07 | 0,0793786 |
| ENSG00000111877 | MCM9     | 6  | 118813442 | 118935162 | protein_coding | 2,07 | 0,4999662 |
| ENSG00000087338 | GMCL1    | 2  | 69829642  | 69881396  | protein_coding | 2,07 | 0,0025348 |
| ENSG00000146122 | DAAM2    | 6  | 39792298  | 39904877  | protein_coding | 2,06 | 0,1867869 |
| ENSG00000171450 | CDK5R2   | 2  | 218959655 | 218962162 | protein_coding | 2,06 | 0,0793786 |
| ENSG00000170315 | UBB      | 17 | 16380798  | 16382745  | protein_coding | 2,06 | 0,0075075 |
| ENSG00000101182 | PSMA7    | 20 | 62136735  | 62143440  | protein_coding | 2,06 | 0,5736135 |
| ENSG00000166192 | SENPA8   | 15 | 72114258  | 72143688  | protein_coding | 2,06 | 0,0050271 |
| ENSG00000173145 | NOC3L    | 10 | 94333226  | 94362959  | protein_coding | 2,06 | 0,4463415 |
| ENSG00000177058 | SLC38A9  | 5  | 55625845  | 55773194  | protein_coding | 2,05 | 0,1598647 |
| ENSG00000164597 | COG5     | 7  | 107201555 | 107564514 | protein_coding | 2,05 | 0,0037996 |
| ENSG00000173226 | IQCB1    | 3  | 121769763 | 121835079 | protein_coding | 2,05 | 0,0148097 |
| ENSG00000173113 | TRMT112  | 11 | 64316460  | 64318084  | protein_coding | 2,05 | 0,0111464 |
| ENSG00000101187 | SLCO4A1  | 20 | 62642445  | 62685785  | protein_coding | 2,04 | 0,6899576 |
| ENSG00000127720 | METTL25  | 12 | 82358497  | 82479236  | protein_coding | 2,04 | 0,2229774 |
| ENSG00000101412 | E2F1     | 20 | 33675683  | 33686404  | protein_coding | 2,04 | 0,1775672 |
| ENSG00000103599 | IQCH     | 15 | 67254800  | 67502260  | protein_coding | 2,04 | 0,0793786 |
| ENSG00000092871 | RFFL     | 17 | 35005990  | 35089319  | protein_coding | 2,04 | 0,2725752 |
| ENSG00000089048 | ESF1     | 20 | 13714322  | 13784886  | protein_coding | 2,04 | 0,4999662 |
| ENSG00000169193 | CCDC126  | 7  | 23597379  | 23644708  | protein_coding | 2,03 | 0,0538744 |
| ENSG00000205683 | DPF3     | 14 | 72619296  | 72894116  | protein_coding | 2,03 | 0,1598647 |
| ENSG00000147654 | EBAG9    | 8  | 109539711 | 109565996 | protein_coding | 2,03 | 0,2229774 |
| ENSG00000123064 | DDX54    | 12 | 113157174 | 113185479 | protein_coding | 2,03 | 0,6142622 |
| ENSG00000242866 | STRC     | 15 | 43599398  | 43618800  | protein_coding | 2,03 | 0,6003007 |
| ENSG00000023608 | SNAPC1   | 14 | 61762357  | 61796428  | protein_coding | 2,03 | 0,6702615 |
| ENSG00000158201 | ABHD3    | 18 | 21650897  | 21704805  | protein_coding | 2,02 | 0,0793786 |
| ENSG00000149089 | APIP     | 11 | 34853094  | 34916499  | protein_coding | 2,02 | 0,3963183 |
| ENSG00000083097 | DOPEY1   | 6  | 83067666  | 83171350  | protein_coding | 2,02 | 0,2229774 |
| ENSG00000187959 | CPSF4L   | 17 | 73248449  | 73262352  | protein_coding | 2,02 | 0,0012807 |
| ENSG00000145075 | CCDC39   | 3  | 180602858 | 180871005 | protein_coding | 2,02 | 0,0538744 |
| ENSG00000088448 | ANKRD10  | 13 | 110878540 | 110915069 | protein_coding | 2,02 | 0,0148097 |
| ENSG00000101224 | CDC25B   | 20 | 3786772   | 3806121   | protein_coding | 2,02 | 0,0609506 |
| ENSG00000136108 | CKAP2    | 13 | 52455429  | 52476628  | protein_coding | 2,02 | 0,0037996 |
| ENSG00000103174 | NAGPA    | 16 | 5024844   | 5034141   | protein_coding | 2,02 | 0,0075075 |
| ENSG00000063245 | EPN1     | 19 | 55675226  | 55709858  | protein_coding | 2,02 | 0,0995111 |
| ENSG00000100567 | PSMA3    | 14 | 58244831  | 58272012  | protein_coding | 2,02 | 0,1245284 |
| ENSG00000154678 | PDE1C    | 7  | 31751179  | 32299329  | protein_coding | 2,02 | 0,1245284 |
| ENSG00000181481 | RNF135   | 17 | 30968785  | 30999911  | protein_coding | 2,01 | 0,0050271 |
| ENSG00000117020 | AKT3     | 1  | 243488233 | 243851079 | protein_coding | 2,01 | 0,0184474 |
| ENSG00000153786 | ZDHHC7   | 16 | 84974181  | 85011535  | protein_coding | 2,01 | 0,0050271 |
| ENSG00000179021 | C3orf38  | 3  | 88149743  | 88168729  | protein_coding | 2,01 | 0,0012807 |
| ENSG00000196104 | SPOCK3   | 4  | 166733384 | 167234796 | protein_coding | 2,00 | 0,0538744 |
| ENSG00000205856 | C22orf42 | 22 | 32149006  | 32159322  | protein_coding | 2,00 | 0,6142622 |
| ENSG00000196218 | RYR1     | 19 | 38433699  | 38587564  | protein_coding | 2,00 | 0,5364729 |
| ENSG00000185974 | GRK1     | 13 | 113667155 | 113737735 | protein_coding | 2,00 | 0,5736135 |
| ENSG00000254466 | OR4D10   | 11 | 59477373  | 59478396  | protein_coding | 2,00 | 0,6142622 |

|                 |         |   |           |           |                |      |           |
|-----------------|---------|---|-----------|-----------|----------------|------|-----------|
| ENSG00000170279 | C7orf33 | 7 | 148590565 | 148615860 | protein_coding | 2,00 | 0,3269660 |
| ENSG00000272514 | CFAP206 | 6 | 87407983  | 87464465  | protein_coding | 2,00 | 0,1245284 |
| ENSG00000163376 | KBTD8   | 3 | 66998307  | 67011210  | protein_coding | 2,00 | 0,0793786 |
| ENSG00000173699 | SPATA3  | 2 | 230996121 | 231025055 | protein_coding | 2,00 | 0,1245284 |

**Supplementary Table S2: List of the 9,045 protein-coding genes upregulated in cumulus granulosa cells**

| Gene ID         | Gene Name | Chromosome | Start_position | End_position | Gene_biotype   | Fold Change | q-value(%) |
|-----------------|-----------|------------|----------------|--------------|----------------|-------------|------------|
| ENSG00000099194 | SCD       | 10         | 100347124      | 100364834    | protein_coding | 62207,91    | 0          |
| ENSG00000147465 | STAR      | 8          | 38143649       | 38151265     | protein_coding | 48811,50    | 0          |
| ENSG00000166710 | B2M       | 15         | 44711477       | 44718877     | protein_coding | 43073,00    | 0          |
| ENSG00000142798 | HSPG2     | 1          | 21822245       | 21937297     | protein_coding | 36646,63    | 0          |
| ENSG00000152661 | GJA1      | 6          | 121435692      | 121449727    | protein_coding | 33062,80    | 0          |
| ENSG00000117594 | HSD11B1   | 1          | 209686178      | 209734950    | protein_coding | 30510,33    | 0          |
| ENSG00000102038 | SMARCA1   | X          | 129446501      | 129523500    | protein_coding | 30296,38    | 0          |
| ENSG00000106366 | SERPINE1  | 7          | 101127089      | 101139266    | protein_coding | 29155,10    | 0          |
| ENSG00000041982 | TNC       | 9          | 115019578      | 115118257    | protein_coding | 28368,50    | 0          |
| ENSG00000023171 | GRAMD1B   | 11         | 123454398      | 123627774    | protein_coding | 26643,80    | 0          |
| ENSG00000187498 | COL4A1    | 13         | 110148963      | 110307149    | protein_coding | 25779,40    | 0          |
| ENSG00000142494 | SLC47A1   | 17         | 19495385       | 19579034     | protein_coding | 23234,10    | 0          |
| ENSG00000124942 | AHNAK     | 11         | 62433542       | 62556235     | protein_coding | 22059,55    | 0          |
| ENSG00000172201 | ID4       | 6          | 19837386       | 19840684     | protein_coding | 20956,70    | 0          |
| ENSG00000185070 | FLRT2     | 14         | 85530144       | 85654426     | protein_coding | 20326,80    | 0          |
| ENSG00000197747 | S100A10   | 1          | 151982915      | 151994390    | protein_coding | 18689,91    | 0          |
| ENSG00000140459 | CYP11A1   | 15         | 74337759       | 74367740     | protein_coding | 18656,10    | 0          |
| ENSG00000147872 | PLIN2     | 9          | 19108375       | 19149290     | protein_coding | 18403,75    | 0          |
| ENSG00000140279 | DUOX2     | 15         | 45092650       | 45114344     | protein_coding | 16442,30    | 0          |
| ENSG00000203859 | HSD3B2    | 1          | 119414931      | 119423035    | protein_coding | 16001,40    | 0          |
| ENSG00000120885 | CLU       | 8          | 27596917       | 27615031     | protein_coding | 14190,94    | 0          |
| ENSG00000073756 | PTGS2     | 1          | 186671791      | 186680427    | protein_coding | 14000,90    | 0          |
| ENSG00000177606 | JUN       | 1          | 58780788       | 58784327     | protein_coding | 13614,60    | 0          |
| ENSG00000154734 | ADAMTS1   | 21         | 26835747       | 26845409     | protein_coding | 13530,80    | 0          |
| ENSG00000143878 | RHOB      | 2          | 20447074       | 20449445     | protein_coding | 13305,70    | 0          |
| ENSG00000169908 | TM4SF1    | 3          | 149369022      | 149377865    | protein_coding | 13015,20    | 0          |
| ENSG00000034510 | TMSB10    | 2          | 84905625       | 84906675     | protein_coding | 12722,91    | 0          |
| ENSG00000182718 | ANXA2     | 15         | 60347134       | 60402883     | protein_coding | 12628,91    | 0          |
| ENSG00000137801 | THBS1     | 15         | 39581079       | 39599466     | protein_coding | 12458,67    | 0          |
| ENSG00000123999 | INHA      | 2          | 219569162      | 219575713    | protein_coding | 12421,42    | 0          |
| ENSG00000102271 | KLHL4     | X          | 87517749       | 87670050     | protein_coding | 12077,60    | 0          |
| ENSG00000204262 | COL5A2    | 2          | 189031896      | 189179879    | protein_coding | 12073,30    | 0          |
| ENSG00000172037 | LAMB2     | 3          | 49121114       | 49133118     | protein_coding | 11669,30    | 0          |
| ENSG00000123560 | PLP1      | X          | 103773718      | 103792619    | protein_coding | 11373,36    | 0          |
| ENSG00000139329 | LUM       | 12         | 91102629       | 91111831     | protein_coding | 11134,50    | 0          |
| ENSG00000167460 | TPM4      | 19         | 16067021       | 16103005     | protein_coding | 10791,00    | 0          |
| ENSG00000108679 | LGALS3BP  | 17         | 78971238       | 78980109     | protein_coding | 10724,00    | 0          |
| ENSG00000102265 | TIMP1     | X          | 47582313       | 47586789     | protein_coding | 10633,57    | 0          |
| ENSG00000187942 | LDLRAD2   | 1          | 21812265       | 21825221     | protein_coding | 10493,20    | 0          |
| ENSG00000204525 | HLA-C     | 6          | 31268749       | 31272130     | protein_coding | 10441,10    | 0          |
| ENSG00000115594 | IL1R1     | 2          | 102064544      | 102179874    | protein_coding | 10398,00    | 0          |
| ENSG00000099250 | NRP1      | 10         | 33177492       | 33336262     | protein_coding | 10000,60    | 0          |
| ENSG00000115380 | EFEMP1    | 2          | 55865967       | 55924139     | protein_coding | 9517,73     | 0          |
| ENSG00000113657 | DPYSL3    | 5          | 147390811      | 147510056    | protein_coding | 9269,66     | 0          |
| ENSG00000122863 | CHST3     | 10         | 71964365       | 72013564     | protein_coding | 9073,80     | 0          |
| ENSG00000166033 | HTRA1     | 10         | 122461525      | 122514908    | protein_coding | 8813,00     | 0          |
| ENSG00000113140 | SPARC     | 5          | 151661096      | 151687165    | protein_coding | 8733,44     | 0          |
| ENSG00000141756 | FKBP10    | 17         | 41812680       | 41823217     | protein_coding | 8639,80     | 0          |
| ENSG00000163430 | FSTL1     | 3          | 120392293      | 120451253    | protein_coding | 8486,80     | 0          |
| ENSG00000163661 | PTX3      | 3          | 157436789      | 157443628    | protein_coding | 8423,40     | 0          |
| ENSG00000060982 | BCAT1     | 12         | 24810022       | 24949459     | protein_coding | 8184,26     | 0          |
| ENSG00000112936 | C7        | 5          | 40909252       | 40982939     | protein_coding | 8080,40     | 0          |
| ENSG00000164125 | FAM198B   | 4          | 158124474      | 158173318    | protein_coding | 8018,60     | 0          |
| ENSG00000102316 | MAGED2    | X          | 54807599       | 54816012     | protein_coding | 7970,71     | 0          |
| ENSG00000187479 | C11orf96  | 11         | 43925342       | 43944338     | protein_coding | 7810,70     | 0          |

|                 |         |    |           |           |                |         |   |
|-----------------|---------|----|-----------|-----------|----------------|---------|---|
| ENSG00000107742 | SPOCK2  | 10 | 72059035  | 72089032  | protein_coding | 7399,20 | 0 |
| ENSG00000206503 | HLA-A   | 6  | 29941260  | 29945884  | protein_coding | 7260,50 | 0 |
| ENSG00000141448 | GATA6   | 18 | 22169443  | 22202528  | protein_coding | 7144,30 | 0 |
| ENSG00000014257 | ACPP    | 3  | 132317367 | 132368298 | protein_coding | 7042,90 | 0 |
| ENSG00000159403 | C1R     | 12 | 7080209   | 7092607   | protein_coding | 7028,40 | 0 |
| ENSG00000092421 | SEMA6A  | 5  | 116443616 | 116574934 | protein_coding | 6855,00 | 0 |
| ENSG00000164171 | ITGA2   | 5  | 52989326  | 53094779  | protein_coding | 6819,27 | 0 |
| ENSG00000134285 | FKBP11  | 12 | 48921518  | 48926474  | protein_coding | 6766,55 | 0 |
| ENSG00000105825 | TFPI2   | 7  | 93885397  | 93890991  | protein_coding | 6753,20 | 0 |
| ENSG00000110148 | CCKBR   | 11 | 6259736   | 6272127   | protein_coding | 6451,40 | 0 |
| ENSG00000171223 | JUNB    | 19 | 12791496  | 12793315  | protein_coding | 6423,40 | 0 |
| ENSG00000272398 | CD24    | 6  | 106969831 | 106975627 | protein_coding | 6392,18 | 0 |
| ENSG00000156515 | HK1     | 10 | 69269984  | 69401882  | protein_coding | 6386,00 | 0 |
| ENSG00000147065 | MSN     | X  | 65588377  | 65741931  | protein_coding | 6351,90 | 0 |
| ENSG00000234745 | HLA-B   | 6  | 31353872  | 31357188  | protein_coding | 6338,35 | 0 |
| ENSG00000122862 | SRGN    | 10 | 69088106  | 69104811  | protein_coding | 6237,80 | 0 |
| ENSG00000135404 | CD63    | 12 | 55725323  | 55729707  | protein_coding | 6135,70 | 0 |
| ENSG00000145730 | PAM     | 5  | 102753981 | 103031105 | protein_coding | 6069,64 | 0 |
| ENSG00000177469 | PTRF    | 17 | 42402452  | 42423517  | protein_coding | 5805,60 | 0 |
| ENSG00000101439 | CST3    | 20 | 23626706  | 23638473  | protein_coding | 5799,80 | 0 |
| ENSG00000179388 | EGR3    | 8  | 22687659  | 22693302  | protein_coding | 5727,30 | 0 |
| ENSG00000124813 | RUNX2   | 6  | 45328157  | 45664349  | protein_coding | 5722,20 | 0 |
| ENSG00000185650 | ZFP36L1 | 14 | 68787660  | 68796253  | protein_coding | 5653,53 | 0 |
| ENSG00000186854 | TRABD2A | 2  | 84821650  | 84907008  | protein_coding | 5620,10 | 0 |
| ENSG00000136717 | BIN1    | 2  | 127048027 | 127107355 | protein_coding | 5595,90 | 0 |
| ENSG00000166681 | NGFRAP1 | X  | 103376340 | 103378077 | protein_coding | 5590,80 | 0 |
| ENSG00000089199 | CHGB    | 20 | 5911430   | 5925361   | protein_coding | 5580,60 | 0 |
| ENSG00000171303 | KCNK3   | 2  | 26692690  | 26733420  | protein_coding | 5563,20 | 0 |
| ENSG00000113389 | NPR3    | 5  | 32689070  | 32791724  | protein_coding | 5368,27 | 0 |
| ENSG00000204592 | HLA-E   | 6  | 30489467  | 30494205  | protein_coding | 5363,50 | 0 |
| ENSG00000108821 | COL1A1  | 17 | 50183289  | 50201632  | protein_coding | 5333,00 | 0 |
| ENSG00000114115 | RBP1    | 3  | 139517434 | 139539829 | protein_coding | 5199,78 | 0 |
| ENSG00000130203 | APOE    | 19 | 44905754  | 44909393  | protein_coding | 5037,16 | 0 |
| ENSG00000122574 | WIPF3   | 7  | 29806486  | 29917066  | protein_coding | 5009,20 | 0 |
| ENSG00000011465 | DCN     | 12 | 91140484  | 91183123  | protein_coding | 4997,10 | 0 |
| ENSG00000064666 | CNN2    | 19 | 1026581   | 1039068   | protein_coding | 4926,60 | 0 |
| ENSG00000049449 | RCN1    | 11 | 31812391  | 32105755  | protein_coding | 4814,20 | 0 |
| ENSG00000188643 | S100A16 | 1  | 153606886 | 153613145 | protein_coding | 4730,86 | 0 |
| ENSG00000084628 | NKAIN1  | 1  | 31179745  | 31239554  | protein_coding | 4664,90 | 0 |
| ENSG00000111716 | LDHB    | 12 | 21635342  | 21757857  | protein_coding | 4602,56 | 0 |
| ENSG00000130202 | PVRL2   | 19 | 44846175  | 44889228  | protein_coding | 4563,00 | 0 |
| ENSG00000168461 | RAB31   | 18 | 9708165   | 9862551   | protein_coding | 4447,40 | 0 |
| ENSG00000145284 | SCD5    | 4  | 82629539  | 82798857  | protein_coding | 4437,20 | 0 |
| ENSG00000185222 | WBP5    | X  | 103356445 | 103358469 | protein_coding | 4418,80 | 0 |
| ENSG00000178695 | KCTD12  | 13 | 76880166  | 76886390  | protein_coding | 4339,10 | 0 |
| ENSG00000116133 | DHCR24  | 1  | 54849633  | 54887218  | protein_coding | 4260,04 | 0 |
| ENSG00000148344 | PTGES   | 9  | 129738331 | 129753047 | protein_coding | 4131,09 | 0 |
| ENSG00000106236 | NPTX2   | 7  | 98617297  | 98629868  | protein_coding | 4092,69 | 0 |
| ENSG00000250722 | SEPP1   | 5  | 42799880  | 42887392  | protein_coding | 4033,60 | 0 |
| ENSG00000050165 | DKK3    | 11 | 11963106  | 12009769  | protein_coding | 4031,80 | 0 |
| ENSG0000024422  | EHD2    | 19 | 47713343  | 47743134  | protein_coding | 3968,70 | 0 |
| ENSG00000114771 | AADAC   | 3  | 151814037 | 151828488 | protein_coding | 3931,00 | 0 |
| ENSG00000079432 | CIC     | 19 | 42268537  | 42295797  | protein_coding | 3930,50 | 0 |
| ENSG00000256235 | SMIM3   | 5  | 150777946 | 150796734 | protein_coding | 3919,50 | 0 |
| ENSG00000184731 | FAM110C | 2  | 38814     | 46870     | protein_coding | 3918,90 | 0 |
| ENSG00000136002 | ARHGEF4 | 2  | 130836916 | 131047263 | protein_coding | 3910,10 | 0 |
| ENSG00000108551 | RASD1   | 17 | 17494437  | 17496395  | protein_coding | 3907,92 | 0 |
| ENSG00000112715 | VEGFA   | 6  | 43770184  | 43786487  | protein_coding | 3907,20 | 0 |



|                 |          |    |           |           |                |         |   |
|-----------------|----------|----|-----------|-----------|----------------|---------|---|
| ENSG00000134824 | FADS2    | 11 | 61792980  | 61867354  | protein_coding | 3905,42 | 0 |
| ENSG00000133169 | BEX1     | X  | 103062651 | 103064240 | protein_coding | 3847,90 | 0 |
| ENSG00000102359 | SRPX2    | X  | 100644218 | 100671299 | protein_coding | 3808,50 | 0 |
| ENSG00000142089 | IFITM3   | 11 | 319669    | 327537    | protein_coding | 3711,46 | 0 |
| ENSG00000101335 | MYL9     | 20 | 36541484  | 36551447  | protein_coding | 3684,30 | 0 |
| ENSG00000134352 | IL6ST    | 5  | 55935095  | 55994993  | protein_coding | 3643,50 | 0 |
| ENSG00000108786 | HSD17B1  | 17 | 42549214  | 42555213  | protein_coding | 3632,00 | 0 |
| ENSG00000149257 | SERPINH1 | 11 | 75562056  | 75572783  | protein_coding | 3600,21 | 0 |
| ENSG00000168542 | COL3A1   | 2  | 188974320 | 189012746 | protein_coding | 3584,70 | 0 |
| ENSG00000075618 | FSCN1    | 7  | 5592823   | 5606655   | protein_coding | 3536,20 | 0 |
| ENSG00000141753 | IGFBP4   | 17 | 40443461  | 40457731  | protein_coding | 3518,70 | 0 |
| ENSG00000176978 | DPP7     | 9  | 137110542 | 137115177 | protein_coding | 3509,91 | 0 |
| ENSG00000154930 | ACSS1    | 20 | 25006230  | 25058980  | protein_coding | 3506,60 | 0 |
| ENSG00000083444 | PLOD1    | 1  | 11934205  | 11975538  | protein_coding | 3475,63 | 0 |
| ENSG00000124882 | EREG     | 4  | 74365143  | 74388751  | protein_coding | 3450,20 | 0 |
| ENSG00000115641 | FHL2     | 2  | 105357712 | 105438513 | protein_coding | 3418,64 | 0 |
| ENSG00000135272 | MDFIC    | 7  | 114922154 | 115019916 | protein_coding | 3401,20 | 0 |
| ENSG00000106624 | AEBP1    | 7  | 44104361  | 44114562  | protein_coding | 3396,60 | 0 |
| ENSG00000116983 | HPCAL4   | 1  | 39678648  | 39691689  | protein_coding | 3394,75 | 0 |
| ENSG00000169116 | PARM1    | 4  | 74933095  | 75050115  | protein_coding | 3389,80 | 0 |
| ENSG00000197956 | S100A6   | 1  | 153534599 | 153536244 | protein_coding | 3361,25 | 0 |
| ENSG00000135424 | ITGA7    | 12 | 55684568  | 55716043  | protein_coding | 3316,27 | 0 |
| ENSG00000122641 | INHBA    | 7  | 41685114  | 41703108  | protein_coding | 3305,70 | 0 |
| ENSG00000171227 | TMEM37   | 2  | 119429901 | 119438520 | protein_coding | 3271,30 | 0 |
| ENSG00000165757 | KIAA1462 | 10 | 30012800  | 30115494  | protein_coding | 3270,78 | 0 |
| ENSG00000163565 | IFI16    | 1  | 158999968 | 159055155 | protein_coding | 3195,90 | 0 |
| ENSG00000109072 | VTN      | 17 | 28367276  | 28373091  | protein_coding | 3192,30 | 0 |
| ENSG00000140961 | OSGIN1   | 16 | 83948282  | 83966332  | protein_coding | 3176,30 | 0 |
| ENSG00000167601 | AXL      | 19 | 41219203  | 41261766  | protein_coding | 3170,50 | 0 |
| ENSG00000139514 | SLC7A1   | 13 | 29509410  | 29595688  | protein_coding | 3146,70 | 0 |
| ENSG00000053747 | LAMA3    | 18 | 23689443  | 23955066  | protein_coding | 3119,80 | 0 |
| ENSG00000000971 | CFH      | 1  | 196651878 | 196747504 | protein_coding | 3083,60 | 0 |
| ENSG00000067182 | TNFRSF1A | 12 | 6328757   | 6342114   | protein_coding | 3057,64 | 0 |
| ENSG00000108175 | ZMIZ1    | 10 | 79069035  | 79316528  | protein_coding | 3054,80 | 0 |
| ENSG00000169871 | TRIM56   | 7  | 101085439 | 101097967 | protein_coding | 3050,60 | 0 |
| ENSG00000171992 | SYNPO    | 5  | 150601080 | 150659220 | protein_coding | 3041,58 | 0 |
| ENSG00000196507 | TCEAL3   | X  | 103607451 | 103629690 | protein_coding | 3035,80 | 0 |
| ENSG00000012779 | ALOX5    | 10 | 45374176  | 45446119  | protein_coding | 3027,80 | 0 |
| ENSG00000130822 | PNCK     | X  | 153669730 | 153689010 | protein_coding | 3027,70 | 0 |
| ENSG00000205403 | CFI      | 4  | 109740694 | 109802179 | protein_coding | 2991,70 | 0 |
| ENSG00000076770 | MBNL3    | X  | 132369317 | 132489968 | protein_coding | 2972,45 | 0 |
| ENSG00000122786 | CALD1    | 7  | 134744252 | 134970728 | protein_coding | 2967,00 | 0 |
| ENSG00000061273 | HDAC7    | 12 | 47782722  | 47833132  | protein_coding | 2936,50 | 0 |
| ENSG00000175445 | LPL      | 8  | 19901717  | 19967258  | protein_coding | 2910,45 | 0 |
| ENSG00000111321 | LTBR     | 12 | 6375045   | 6391571   | protein_coding | 2873,70 | 0 |
| ENSG00000249242 | TMEM150C | 4  | 82483170  | 82562357  | protein_coding | 2865,20 | 0 |
| ENSG00000120057 | SFRP5    | 10 | 97766751  | 97771952  | protein_coding | 2817,32 | 0 |
| ENSG00000179222 | MAGED1   | X  | 51803007  | 51902357  | protein_coding | 2811,67 | 0 |
| ENSG00000106571 | GLI3     | 7  | 41960950  | 42237870  | protein_coding | 2788,20 | 0 |
| ENSG00000175164 | ABO      | 9  | 133250401 | 133275214 | protein_coding | 2783,40 | 0 |
| ENSG00000164692 | COL1A2   | 7  | 94394561  | 94431232  | protein_coding | 2765,56 | 0 |
| ENSG00000104415 | WISP1    | 8  | 133191039 | 133230344 | protein_coding | 2747,80 | 0 |
| ENSG00000166888 | STAT6    | 12 | 57095408  | 57132139  | protein_coding | 2722,60 | 0 |
| ENSG00000166250 | CLMP     | 11 | 123069865 | 123195281 | protein_coding | 2701,90 | 0 |
| ENSG00000196924 | FLNA     | X  | 154348524 | 154374638 | protein_coding | 2686,88 | 0 |
| ENSG00000198865 | CCDC152  | 5  | 42756801  | 42802360  | protein_coding | 2674,30 | 0 |
| ENSG00000124145 | SDC4     | 20 | 45325288  | 45348424  | protein_coding | 2672,00 | 0 |
| ENSG00000123689 | GOS2     | 1  | 209675420 | 209676388 | protein_coding | 2637,00 | 0 |

|                 |          |    |           |           |                |         |   |
|-----------------|----------|----|-----------|-----------|----------------|---------|---|
| ENSG00000146676 | PURB     | 7  | 44876293  | 44885361  | protein_coding | 2634,27 | 0 |
| ENSG00000102024 | PLS3     | X  | 115561174 | 115650861 | protein_coding | 2634,00 | 0 |
| ENSG00000198467 | TPM2     | 9  | 35681992  | 35691020  | protein_coding | 2619,64 | 0 |
| ENSG00000160360 | GPSM1    | 9  | 136327476 | 136359605 | protein_coding | 2617,00 | 0 |
| ENSG00000026025 | VIM      | 10 | 17228259  | 17237593  | protein_coding | 2616,51 | 0 |
| ENSG00000117525 | F3       | 1  | 94529225  | 94541800  | protein_coding | 2601,30 | 0 |
| ENSG00000122877 | EGR2     | 10 | 62811996  | 62919900  | protein_coding | 2592,90 | 0 |
| ENSG00000171867 | PRNP     | 20 | 4686236   | 4701590   | protein_coding | 2590,90 | 0 |
| ENSG00000167580 | AQP2     | 12 | 49950741  | 49958881  | protein_coding | 2587,00 | 0 |
| ENSG00000109107 | ALDOC    | 17 | 28573115  | 28577264  | protein_coding | 2580,30 | 0 |
| ENSG00000164442 | CITED2   | 6  | 139371807 | 139374620 | protein_coding | 2577,70 | 0 |
| ENSG00000157227 | MMP14    | 14 | 22836557  | 22849027  | protein_coding | 2561,90 | 0 |
| ENSG00000197122 | SRC      | 20 | 37344685  | 37406050  | protein_coding | 2554,50 | 0 |
| ENSG00000038427 | VCAN     | 5  | 83471465  | 83582303  | protein_coding | 2543,69 | 0 |
| ENSG00000100403 | ZC3H7B   | 22 | 41301522  | 41360147  | protein_coding | 2525,70 | 0 |
| ENSG00000146648 | EGFR     | 7  | 55019021  | 55256620  | protein_coding | 2524,80 | 0 |
| ENSG00000136158 | SPRY2    | 13 | 80335976  | 80340951  | protein_coding | 2507,90 | 0 |
| ENSG00000159388 | BTG2     | 1  | 203305491 | 203309602 | protein_coding | 2493,80 | 0 |
| ENSG00000019582 | CD74     | 5  | 150401637 | 150412929 | protein_coding | 2479,30 | 0 |
| ENSG00000159164 | SV2A     | 1  | 149903318 | 149917882 | protein_coding | 2477,00 | 0 |
| ENSG00000102007 | PLP2     | X  | 49171926  | 49175239  | protein_coding | 2462,73 | 0 |
| ENSG00000120659 | TNFSF11  | 13 | 42562736  | 42608013  | protein_coding | 2454,70 | 0 |
| ENSG00000169710 | FASN     | 17 | 82078333  | 82098332  | protein_coding | 2434,14 | 0 |
| ENSG00000124570 | SERPINB6 | 6  | 2948159   | 2972165   | protein_coding | 2425,90 | 0 |
| ENSG00000162772 | ATF3     | 1  | 212565334 | 212620777 | protein_coding | 2424,80 | 0 |
| ENSG00000002587 | HS3ST1   | 4  | 11393150  | 11429765  | protein_coding | 2402,50 | 0 |
| ENSG00000197635 | DPP4     | 2  | 161992241 | 162074542 | protein_coding | 2402,20 | 0 |
| ENSG00000099949 | LZTR1    | 22 | 20979462  | 20999038  | protein_coding | 2377,82 | 0 |
| ENSG00000184897 | H1FX     | 3  | 129314771 | 129316277 | protein_coding | 2370,90 | 0 |
| ENSG00000170899 | GSTA4    | 6  | 52977948  | 52995378  | protein_coding | 2352,00 | 0 |
| ENSG00000186432 | KPNA4    | 3  | 160494995 | 160565588 | protein_coding | 2340,45 | 0 |
| ENSG00000169554 | ZEB2     | 2  | 144384081 | 144524583 | protein_coding | 2333,57 | 0 |
| ENSG00000163083 | INHBB    | 2  | 120346143 | 120351808 | protein_coding | 2319,90 | 0 |
| ENSG00000103855 | CD276    | 15 | 73683966  | 73714518  | protein_coding | 2318,85 | 0 |
| ENSG00000182871 | COL18A1  | 21 | 45405137  | 45513720  | protein_coding | 2296,70 | 0 |
| ENSG00000196230 | TUBB     | 6  | 30720201  | 30725426  | protein_coding | 2293,98 | 0 |
| ENSG00000159069 | FBXW5    | 9  | 136940435 | 136944696 | protein_coding | 2279,42 | 0 |
| ENSG00000144655 | CSRNP1   | 3  | 39141855  | 39154562  | protein_coding | 2262,00 | 0 |
| ENSG00000102409 | BEX4     | X  | 103215092 | 103217246 | protein_coding | 2259,50 | 0 |
| ENSG00000140682 | TGFB1I1  | 16 | 31471585  | 31477960  | protein_coding | 2253,36 | 0 |
| ENSG00000004139 | SARM1    | 17 | 28364356  | 28404049  | protein_coding | 2237,90 | 0 |
| ENSG00000172638 | EFEMP2   | 11 | 65866441  | 65873592  | protein_coding | 2227,10 | 0 |
| ENSG00000163191 | S100A11  | 1  | 152032506 | 152047907 | protein_coding | 2225,67 | 0 |
| ENSG00000136931 | NR5A1    | 9  | 124481236 | 124507430 | protein_coding | 2225,10 | 0 |
| ENSG00000123358 | NR4A1    | 12 | 52022832  | 52059507  | protein_coding | 2219,70 | 0 |
| ENSG00000231925 | TAPBP    | 6  | 33299694  | 33314387  | protein_coding | 2214,85 | 0 |
| ENSG00000153721 | CNKSR3   | 6  | 154159828 | 154510659 | protein_coding | 2210,92 | 0 |
| ENSG00000119138 | KLF9     | 9  | 70384597  | 70414624  | protein_coding | 2209,10 | 0 |
| ENSG00000118418 | HMGN3    | 6  | 79201245  | 79234738  | protein_coding | 2208,30 | 0 |
| ENSG00000147119 | CHST7    | X  | 46573784  | 46598408  | protein_coding | 2189,45 | 0 |
| ENSG00000102401 | ARMCX3   | X  | 101622797 | 101627843 | protein_coding | 2183,30 | 0 |
| ENSG00000012171 | SEMA3B   | 3  | 50267558  | 50277546  | protein_coding | 2178,60 | 0 |
| ENSG00000171310 | CHST11   | 12 | 104455295 | 104762014 | protein_coding | 2163,50 | 0 |
| ENSG00000148926 | ADM      | 11 | 10304680  | 10307397  | protein_coding | 2147,40 | 0 |
| ENSG00000185559 | DLK1     | 14 | 100725705 | 100738224 | protein_coding | 2145,90 | 0 |
| ENSG00000161638 | ITGA5    | 12 | 54395261  | 54419460  | protein_coding | 2130,77 | 0 |
| ENSG00000186635 | ARAP1    | 11 | 72685069  | 72793599  | protein_coding | 2112,58 | 0 |
| ENSG00000134121 | CHL1     | 3  | 196596    | 409417    | protein_coding | 2107,20 | 0 |

|                 |            |    |           |           |                |         |   |
|-----------------|------------|----|-----------|-----------|----------------|---------|---|
| ENSG00000177697 | CD151      | 11 | 832843    | 839831    | protein_coding | 2093,56 | 0 |
| ENSG00000137463 | MGARP      | 4  | 139266163 | 139280338 | protein_coding | 2077,27 | 0 |
| ENSG00000082212 | ME2        | 18 | 50879049  | 50954257  | protein_coding | 2072,52 | 0 |
| ENSG00000091428 | RAPGEF4    | 2  | 172735274 | 173052893 | protein_coding | 2068,20 | 0 |
| ENSG00000198563 | DDX39B     | 6  | 31530219  | 31542448  | protein_coding | 2049,50 | 0 |
| ENSG00000198300 | PEG3       | 19 | 56810083  | 56840728  | protein_coding | 2040,59 | 0 |
| ENSG00000140931 | CMTM3      | 16 | 66603874  | 66613892  | protein_coding | 2035,91 | 0 |
| ENSG00000165507 | C10orf10   | 10 | 44970981  | 44978810  | protein_coding | 2033,70 | 0 |
| ENSG00000003436 | TFPI       | 2  | 187464230 | 187565760 | protein_coding | 2032,59 | 0 |
| ENSG00000139289 | PHLDA1     | 12 | 76025447  | 76033932  | protein_coding | 2030,54 | 0 |
| ENSG00000109787 | KLF3       | 4  | 38664196  | 38701042  | protein_coding | 1990,40 | 0 |
| ENSG00000149639 | SOGA1      | 20 | 36777442  | 36863686  | protein_coding | 1988,83 | 0 |
| ENSG00000111674 | ENO2       | 12 | 6913745   | 6923698   | protein_coding | 1980,80 | 0 |
| ENSG00000168394 | TAP1       | 6  | 32845209  | 32853978  | protein_coding | 1957,70 | 0 |
| ENSG00000279576 | ENSG000002 | 11 | 65502034  | 65503622  | protein_coding | 1957,63 | 0 |
| ENSG00000143515 | ATP8B2     | 1  | 154325553 | 154351307 | protein_coding | 1956,00 | 0 |
| ENSG00000072422 | RHOBTB1    | 10 | 60869438  | 61001440  | protein_coding | 1933,70 | 0 |
| ENSG00000107796 | ACTA2      | 10 | 88935074  | 88991390  | protein_coding | 1930,18 | 0 |
| ENSG00000076351 | SLC46A1    | 17 | 28394756  | 28407197  | protein_coding | 1920,50 | 0 |
| ENSG00000100003 | SEC14L2    | 22 | 30396857  | 30425317  | protein_coding | 1906,14 | 0 |
| ENSG00000136295 | TTYH3      | 7  | 2631951   | 2664802   | protein_coding | 1905,83 | 0 |
| ENSG00000082175 | PGR        | 11 | 101029624 | 101130524 | protein_coding | 1903,60 | 0 |
| ENSG00000134871 | COL4A2     | 13 | 110305812 | 110513027 | protein_coding | 1898,52 | 0 |
| ENSG00000111684 | LPCAT3     | 12 | 6976186   | 7018510   | protein_coding | 1881,62 | 0 |
| ENSG00000116711 | PLA2G4A    | 1  | 186828953 | 186988981 | protein_coding | 1879,50 | 0 |
| ENSG00000118137 | APOA1      | 11 | 116835751 | 116837950 | protein_coding | 1850,08 | 0 |
| ENSG00000136997 | MYC        | 8  | 127735434 | 127741434 | protein_coding | 1837,00 | 0 |
| ENSG00000165801 | ARHGEF40   | 14 | 21070270  | 21090240  | protein_coding | 1833,60 | 0 |
| ENSG00000184557 | SOCS3      | 17 | 78356778  | 78360077  | protein_coding | 1821,60 | 0 |
| ENSG00000107819 | SFXN3      | 10 | 101031234 | 101041244 | protein_coding | 1815,60 | 0 |
| ENSG00000171812 | COL8A2     | 1  | 36095236  | 36125220  | protein_coding | 1797,90 | 0 |
| ENSG00000130589 | HELZ2      | 20 | 63558086  | 63574239  | protein_coding | 1781,23 | 0 |
| ENSG00000140263 | SORD       | 15 | 45023104  | 45077185  | protein_coding | 1765,86 | 0 |
| ENSG00000118523 | CTGF       | 6  | 131948176 | 131951373 | protein_coding | 1763,18 | 0 |
| ENSG00000121060 | TRIM25     | 17 | 56887909  | 56914038  | protein_coding | 1762,30 | 0 |
| ENSG00000265107 | GJA5       | 1  | 147756199 | 147773362 | protein_coding | 1757,20 | 0 |
| ENSG00000120129 | DUSP1      | 5  | 172768090 | 172771195 | protein_coding | 1754,15 | 0 |
| ENSG00000165169 | DYNLT3     | X  | 37836757  | 37847637  | protein_coding | 1744,20 | 0 |
| ENSG00000169429 | CXCL8      | 4  | 73740506  | 73743716  | protein_coding | 1740,70 | 0 |
| ENSG00000162745 | OLFML2B    | 1  | 161983192 | 162023854 | protein_coding | 1740,10 | 0 |
| ENSG00000140937 | CDH11      | 16 | 64943753  | 65126112  | protein_coding | 1719,60 | 0 |
| ENSG00000144802 | NFKBIZ     | 3  | 101827991 | 101861022 | protein_coding | 1718,70 | 0 |
| ENSG00000243955 | GSTA1      | 6  | 52791664  | 52803910  | protein_coding | 1712,30 | 0 |
| ENSG00000173334 | TRIB1      | 8  | 125430321 | 125438405 | protein_coding | 1709,93 | 0 |
| ENSG00000196576 | PLXNB2     | 22 | 50274979  | 50307627  | protein_coding | 1705,08 | 0 |
| ENSG00000134250 | NOTCH2     | 1  | 119911553 | 120069626 | protein_coding | 1703,02 | 0 |
| ENSG00000130821 | SLC6A8     | X  | 153688099 | 153696593 | protein_coding | 1682,08 | 0 |
| ENSG00000101680 | LAMA1      | 18 | 6941744   | 7117814   | protein_coding | 1676,11 | 0 |
| ENSG00000197586 | ENTPD6     | 20 | 25195693  | 25226729  | protein_coding | 1668,33 | 0 |
| ENSG00000152785 | BMP3       | 4  | 81030965  | 81057531  | protein_coding | 1662,64 | 0 |
| ENSG00000145391 | SETD7      | 4  | 139495941 | 139606699 | protein_coding | 1649,20 | 0 |
| ENSG00000128342 | LIF        | 22 | 30240447  | 30246851  | protein_coding | 1643,30 | 0 |
| ENSG00000182636 | NDN        | 15 | 23685400  | 23687330  | protein_coding | 1637,10 | 0 |
| ENSG00000140853 | NLRC5      | 16 | 56989485  | 57083531  | protein_coding | 1628,30 | 0 |
| ENSG00000122642 | FKBP9      | 7  | 32957404  | 33006931  | protein_coding | 1621,80 | 0 |
| ENSG00000143384 | MCL1       | 1  | 150574551 | 150579738 | protein_coding | 1613,10 | 0 |
| ENSG00000111371 | SLC38A1    | 12 | 46183063  | 46270017  | protein_coding | 1606,50 | 0 |
| ENSG00000130222 | GADD45G    | 9  | 89605013  | 89606555  | protein_coding | 1601,40 | 0 |

|                 |          |    |           |           |                |         |   |
|-----------------|----------|----|-----------|-----------|----------------|---------|---|
| ENSG00000100242 | SUN2     | 22 | 38734725  | 38794143  | protein_coding | 1582,67 | 0 |
| ENSG00000117114 | ADGRL2   | 1  | 81306160  | 81992436  | protein_coding | 1576,17 | 0 |
| ENSG00000100441 | KHNYN    | 14 | 24429286  | 24441834  | protein_coding | 1573,61 | 0 |
| ENSG00000147044 | CASK     | X  | 41514934  | 41923463  | protein_coding | 1569,24 | 0 |
| ENSG00000107731 | UNC5B    | 10 | 71212570  | 71302864  | protein_coding | 1561,40 | 0 |
| ENSG00000170989 | S1PR1    | 1  | 101236888 | 101241518 | protein_coding | 1559,10 | 0 |
| ENSG00000124225 | PMEPA1   | 20 | 57648392  | 57711536  | protein_coding | 1554,80 | 0 |
| ENSG00000100504 | PYGL     | 14 | 50857891  | 50944736  | protein_coding | 1550,80 | 0 |
| ENSG00000109113 | RAB34    | 17 | 28714281  | 28718429  | protein_coding | 1538,00 | 0 |
| ENSG00000078018 | MAP2     | 2  | 209424058 | 209734118 | protein_coding | 1528,70 | 0 |
| ENSG00000205903 | ZNF316   | 7  | 6637322   | 6656432   | protein_coding | 1521,40 | 0 |
| ENSG00000137331 | IER3     | 6  | 30743199  | 30744554  | protein_coding | 1518,91 | 0 |
| ENSG00000213965 | NUDT19   | 19 | 32691961  | 32713796  | protein_coding | 1515,50 | 0 |
| ENSG00000187688 | TRPV2    | 17 | 16415542  | 16437003  | protein_coding | 1512,60 | 0 |
| ENSG00000170017 | ALCAM    | 3  | 105366909 | 105576900 | protein_coding | 1499,70 | 0 |
| ENSG00000205678 | TECRL    | 4  | 64275257  | 64409468  | protein_coding | 1491,90 | 0 |
| ENSG00000081189 | MEF2C    | 5  | 88717117  | 88904257  | protein_coding | 1481,58 | 0 |
| ENSG00000133636 | NTS      | 12 | 85874295  | 85882992  | protein_coding | 1481,40 | 0 |
| ENSG00000188313 | PLSCR1   | 3  | 146515180 | 146544864 | protein_coding | 1474,00 | 0 |
| ENSG00000198734 | F5       | 1  | 169514166 | 169586588 | protein_coding | 1470,70 | 0 |
| ENSG00000145431 | PDGFC    | 4  | 156760454 | 156971394 | protein_coding | 1467,80 | 0 |
| ENSG00000204681 | GABBR1   | 6  | 29555629  | 29633976  | protein_coding | 1453,10 | 0 |
| ENSG00000167716 | WDR81    | 17 | 1716523   | 1738599   | protein_coding | 1448,60 | 0 |
| ENSG00000129675 | ARHGEF6  | X  | 136665547 | 136782088 | protein_coding | 1446,71 | 0 |
| ENSG00000137509 | PRCP     | 11 | 82823502  | 82970584  | protein_coding | 1446,64 | 0 |
| ENSG00000143390 | RFX5     | 1  | 151340640 | 151347357 | protein_coding | 1444,60 | 0 |
| ENSG00000139116 | KIF21A   | 12 | 39293228  | 39443390  | protein_coding | 1440,00 | 0 |
| ENSG00000163389 | POGLUT1  | 3  | 119468938 | 119494708 | protein_coding | 1431,80 | 0 |
| ENSG00000168685 | IL7R     | 5  | 35852695  | 35879603  | protein_coding | 1425,70 | 0 |
| ENSG00000077522 | ACTN2    | 1  | 236686454 | 236764631 | protein_coding | 1421,09 | 0 |
| ENSG00000141338 | ABCA8    | 17 | 68867292  | 68955392  | protein_coding | 1418,31 | 0 |
| ENSG00000090924 | PLEKHG2  | 19 | 39412585  | 39428415  | protein_coding | 1416,10 | 0 |
| ENSG00000090376 | IRAK3    | 12 | 66188879  | 66254622  | protein_coding | 1416,00 | 0 |
| ENSG00000225614 | ZNF469   | 16 | 88427471  | 88440757  | protein_coding | 1399,30 | 0 |
| ENSG00000100968 | NFATC4   | 14 | 24365673  | 24379604  | protein_coding | 1394,14 | 0 |
| ENSG00000104964 | AES      | 19 | 3052910   | 3063107   | protein_coding | 1375,58 | 0 |
| ENSG00000266714 | MYO15B   | 17 | 75588058  | 75626501  | protein_coding | 1373,68 | 0 |
| ENSG00000026508 | CD44     | 11 | 35138870  | 35232402  | protein_coding | 1366,10 | 0 |
| ENSG00000140332 | TLE3     | 15 | 70047790  | 70098176  | protein_coding | 1363,36 | 0 |
| ENSG00000180914 | OXTR     | 3  | 8750408   | 8769628   | protein_coding | 1361,60 | 0 |
| ENSG00000000003 | TSPAN6   | X  | 100627109 | 100639991 | protein_coding | 1360,55 | 0 |
| ENSG00000189186 | DCAF8L2  | X  | 27590382  | 27748821  | protein_coding | 1359,10 | 0 |
| ENSG00000074800 | ENO1     | 1  | 8861002   | 8879249   | protein_coding | 1357,95 | 0 |
| ENSG00000153714 | LURAP1L  | 9  | 12775021  | 12822131  | protein_coding | 1356,60 | 0 |
| ENSG00000170369 | CST2     | 20 | 23823769  | 23826731  | protein_coding | 1354,00 | 0 |
| ENSG00000134042 | MRO      | 18 | 50795120  | 50825402  | protein_coding | 1353,17 | 0 |
| ENSG00000165802 | NSMF     | 9  | 137447570 | 137459334 | protein_coding | 1350,86 | 0 |
| ENSG00000141504 | SAT2     | 17 | 7626234   | 7627876   | protein_coding | 1349,80 | 0 |
| ENSG00000166825 | ANPEP    | 15 | 89784889  | 89815401  | protein_coding | 1344,50 | 0 |
| ENSG00000221972 | C3orf36  | 3  | 133928145 | 133929812 | protein_coding | 1339,00 | 0 |
| ENSG00000102034 | ELF4     | X  | 130064874 | 130110716 | protein_coding | 1333,00 | 0 |
| ENSG00000131171 | SH3BGR1  | X  | 81201943  | 81298547  | protein_coding | 1318,00 | 0 |
| ENSG00000064726 | BTBD1    | 15 | 83016422  | 83067354  | protein_coding | 1313,50 | 0 |
| ENSG00000197872 | FAM49A   | 2  | 16549459  | 16666331  | protein_coding | 1312,20 | 0 |
| ENSG00000019549 | SNAI2    | 8  | 48917690  | 48921740  | protein_coding | 1311,80 | 0 |
| ENSG00000142227 | EMP3     | 19 | 48321509  | 48330553  | protein_coding | 1296,08 | 0 |
| ENSG00000143382 | ADAMTSL4 | 1  | 150549369 | 150560937 | protein_coding | 1289,30 | 0 |
| ENSG00000182326 | C1S      | 12 | 6988259   | 7071032   | protein_coding | 1286,28 | 0 |

|                 |          |    |           |           |                |         |   |
|-----------------|----------|----|-----------|-----------|----------------|---------|---|
| ENSG00000184613 | NELL2    | 12 | 44508275  | 44921848  | protein_coding | 1282,20 | 0 |
| ENSG00000113916 | BCL6     | 3  | 187721377 | 187745727 | protein_coding | 1276,86 | 0 |
| ENSG00000105767 | CADM4    | 19 | 43622368  | 43639839  | protein_coding | 1264,80 | 0 |
| ENSG00000116717 | GADD45A  | 1  | 67685061  | 67688338  | protein_coding | 1263,95 | 0 |
| ENSG00000139211 | AMIGO2   | 12 | 47075707  | 47079951  | protein_coding | 1263,50 | 0 |
| ENSG00000085491 | SLC25A24 | 1  | 108134036 | 108200849 | protein_coding | 1256,40 | 0 |
| ENSG00000172465 | TCEAL1   | X  | 103628704 | 103630953 | protein_coding | 1253,00 | 0 |
| ENSG00000079308 | TNS1     | 2  | 217799789 | 218002995 | protein_coding | 1251,08 | 0 |
| ENSG00000160752 | FDPS     | 1  | 155308748 | 155320666 | protein_coding | 1250,88 | 0 |
| ENSG00000176155 | CCDC57   | 17 | 82101460  | 82212830  | protein_coding | 1250,38 | 0 |
| ENSG00000196954 | CASP4    | 11 | 104942866 | 104969436 | protein_coding | 1248,40 | 0 |
| ENSG00000131435 | PDLIM4   | 5  | 132257671 | 132273454 | protein_coding | 1248,00 | 0 |
| ENSG00000180921 | FAM83H   | 8  | 143723933 | 143733801 | protein_coding | 1246,15 | 0 |
| ENSG00000105939 | ZC3HAV1  | 7  | 139043520 | 139109719 | protein_coding | 1238,52 | 0 |
| ENSG00000144843 | ADPRH    | 3  | 119579268 | 119589945 | protein_coding | 1229,30 | 0 |
| ENSG00000198753 | PLXNB3   | X  | 153764196 | 153779346 | protein_coding | 1227,70 | 0 |
| ENSG00000031081 | ARHGAP31 | 3  | 119294373 | 119420714 | protein_coding | 1222,68 | 0 |
| ENSG00000181458 | TMEM45A  | 3  | 100492619 | 100577444 | protein_coding | 1218,30 | 0 |
| ENSG00000086289 | EPDR1    | 7  | 37683843  | 37951941  | protein_coding | 1214,30 | 0 |
| ENSG00000157766 | ACAN     | 15 | 88803443  | 88875354  | protein_coding | 1213,74 | 0 |
| ENSG00000106868 | SUSD1    | 9  | 112040785 | 112175408 | protein_coding | 1209,10 | 0 |
| ENSG00000181751 | C5orf30  | 5  | 103258702 | 103278660 | protein_coding | 1202,90 | 0 |
| ENSG00000163840 | DTX3L    | 3  | 122564238 | 122575203 | protein_coding | 1191,80 | 0 |
| ENSG00000275832 | ARHGAP23 | 17 | 38419280  | 38512392  | protein_coding | 1188,90 | 0 |
| ENSG00000197043 | ANXA6    | 5  | 151100712 | 151157882 | protein_coding | 1187,82 | 0 |
| ENSG00000104881 | PPP1R13L | 19 | 45379634  | 45406349  | protein_coding | 1186,00 | 0 |
| ENSG00000185565 | LSAMP    | 3  | 115802363 | 117139389 | protein_coding | 1184,57 | 0 |
| ENSG00000182087 | TMEM259  | 19 | 1009648   | 1021179   | protein_coding | 1180,98 | 0 |
| ENSG00000188522 | FAM83G   | 17 | 18968789  | 19004804  | protein_coding | 1179,20 | 0 |
| ENSG00000165449 | SLC16A9  | 10 | 59650761  | 59736002  | protein_coding | 1170,50 | 0 |
| ENSG00000165795 | NDRG2    | 14 | 21016763  | 21070872  | protein_coding | 1169,40 | 0 |
| ENSG00000124920 | MYRF     | 11 | 61752642  | 61788518  | protein_coding | 1168,70 | 0 |
| ENSG00000078596 | ITM2A    | X  | 79360384  | 79367667  | protein_coding | 1168,50 | 0 |
| ENSG00000178951 | ZBTB7A   | 19 | 4044364   | 4066945   | protein_coding | 1166,09 | 0 |
| ENSG00000125398 | SOX9     | 17 | 72121020  | 72126420  | protein_coding | 1164,03 | 0 |
| ENSG00000178814 | OPLAH    | 8  | 144051266 | 144063832 | protein_coding | 1158,50 | 0 |
| ENSG00000117152 | RGS4     | 1  | 163068775 | 163076802 | protein_coding | 1157,69 | 0 |
| ENSG00000109099 | PMP22    | 17 | 15229777  | 15265326  | protein_coding | 1154,20 | 0 |
| ENSG00000112343 | TRIM38   | 6  | 25962802  | 25991226  | protein_coding | 1149,10 | 0 |
| ENSG00000156587 | UBE2L6   | 11 | 57551656  | 57568284  | protein_coding | 1148,90 | 0 |
| ENSG00000111981 | ULBP1    | 6  | 149964007 | 149973710 | protein_coding | 1146,60 | 0 |
| ENSG00000204287 | HLA-DRA  | 6  | 32439842  | 32445046  | protein_coding | 1142,10 | 0 |
| ENSG00000169499 | PLEKHA2  | 8  | 38901235  | 38973909  | protein_coding | 1140,00 | 0 |
| ENSG00000244509 | APOBEC3C | 22 | 39014083  | 39020352  | protein_coding | 1130,00 | 0 |
| ENSG00000176049 | JAKMIP2  | 5  | 147585439 | 147782848 | protein_coding | 1129,80 | 0 |
| ENSG00000166340 | TPP1     | 11 | 6612763   | 6619461   | protein_coding | 1128,69 | 0 |
| ENSG00000132793 | LPIN3    | 20 | 41340920  | 41360582  | protein_coding | 1120,10 | 0 |
| ENSG00000054356 | PTPRN    | 2  | 219289623 | 219309648 | protein_coding | 1114,52 | 0 |
| ENSG00000003402 | CFLAR    | 2  | 201116104 | 201176687 | protein_coding | 1112,82 | 0 |
| ENSG00000133121 | STARD13  | 13 | 33103135  | 33350630  | protein_coding | 1106,29 | 0 |
| ENSG00000140320 | BAHD1    | 15 | 40439721  | 40468242  | protein_coding | 1106,20 | 0 |
| ENSG00000178209 | PLEC     | 8  | 143915147 | 143976734 | protein_coding | 1104,43 | 0 |
| ENSG00000086544 | ITPKC    | 19 | 40717103  | 40740860  | protein_coding | 1102,69 | 0 |
| ENSG00000134668 | SPOCD1   | 1  | 31790422  | 31816051  | protein_coding | 1101,33 | 0 |
| ENSG00000162413 | KLHL21   | 1  | 6590724   | 6614607   | protein_coding | 1092,10 | 0 |
| ENSG00000118596 | SLC16A7  | 12 | 59596067  | 59789855  | protein_coding | 1091,60 | 0 |
| ENSG00000164251 | F2RL1    | 5  | 76818933  | 76835315  | protein_coding | 1091,50 | 0 |
| ENSG00000157514 | TSC22D3  | X  | 107713221 | 107777342 | protein_coding | 1089,71 | 0 |

|                 |          |    |           |           |                |         |   |
|-----------------|----------|----|-----------|-----------|----------------|---------|---|
| ENSG00000180964 | TCEAL8   | X  | 103252995 | 103255203 | protein_coding | 1089,36 | 0 |
| ENSG00000126709 | IFI6     | 1  | 27666061  | 27672218  | protein_coding | 1087,20 | 0 |
| ENSG00000044090 | CUL7     | 6  | 43037617  | 43053945  | protein_coding | 1086,29 | 0 |
| ENSG00000146833 | TRIM4    | 7  | 99876958  | 99919600  | protein_coding | 1085,18 | 0 |
| ENSG00000149289 | ZC3H12C  | 11 | 110093361 | 110171841 | protein_coding | 1083,46 | 0 |
| ENSG00000184500 | PROS1    | 3  | 93873033  | 93974066  | protein_coding | 1082,90 | 0 |
| ENSG00000115850 | LCT      | 2  | 135787840 | 135837180 | protein_coding | 1070,30 | 0 |
| ENSG00000110719 | TCIRG1   | 11 | 68039016  | 68050895  | protein_coding | 1069,25 | 0 |
| ENSG00000104774 | MAN2B1   | 19 | 12646511  | 12666742  | protein_coding | 1065,62 | 0 |
| ENSG00000183943 | PRKX     | X  | 3604370   | 3713608   | protein_coding | 1064,14 | 0 |
| ENSG00000166922 | SCG5     | 15 | 32641676  | 32697098  | protein_coding | 1063,50 | 0 |
| ENSG00000165175 | MID1P1   | X  | 38801432  | 38806537  | protein_coding | 1062,70 | 0 |
| ENSG00000177426 | TGIF1    | 18 | 3411608   | 3459978   | protein_coding | 1062,00 | 0 |
| ENSG00000185880 | TRIM69   | 15 | 44728988  | 44767829  | protein_coding | 1061,80 | 0 |
| ENSG00000152766 | ANKRD22  | 10 | 88822132  | 88851818  | protein_coding | 1059,92 | 0 |
| ENSG00000165476 | REEP3    | 10 | 63521363  | 63625123  | protein_coding | 1058,41 | 0 |
| ENSG00000087152 | ATXN7L3  | 17 | 44191805  | 44200113  | protein_coding | 1053,88 | 0 |
| ENSG00000183853 | KIRREL   | 1  | 157993273 | 158100262 | protein_coding | 1050,90 | 0 |
| ENSG00000136720 | HS6ST1   | 2  | 128236716 | 128318577 | protein_coding | 1046,29 | 0 |
| ENSG0000010818  | HIVEP2   | 6  | 142751467 | 142945201 | protein_coding | 1045,40 | 0 |
| ENSG00000134294 | SLC38A2  | 12 | 46358189  | 46372867  | protein_coding | 1044,57 | 0 |
| ENSG00000171451 | DSEL     | 18 | 67506582  | 67516980  | protein_coding | 1042,00 | 0 |
| ENSG00000188488 | SERPINA5 | 14 | 94561442  | 94593120  | protein_coding | 1035,25 | 0 |
| ENSG00000005486 | RHBDD2   | 7  | 75842602  | 75888926  | protein_coding | 1029,46 | 0 |
| ENSG00000166341 | DCHS1    | 11 | 6621323   | 6655854   | protein_coding | 1028,23 | 0 |
| ENSG00000138834 | MAPK8IP3 | 16 | 1706183   | 1770317   | protein_coding | 1019,68 | 0 |
| ENSG00000143862 | ARL8A    | 1  | 202133404 | 202144743 | protein_coding | 1018,60 | 0 |
| ENSG00000115290 | GRB14    | 2  | 164492812 | 164621848 | protein_coding | 1016,73 | 0 |
| ENSG00000139178 | C1RL     | 12 | 7089587   | 7109273   | protein_coding | 1015,69 | 0 |
| ENSG00000134504 | KCTD1    | 18 | 26454910  | 26657401  | protein_coding | 1005,20 | 0 |
| ENSG00000185340 | GAS2L1   | 22 | 29306582  | 29312785  | protein_coding | 1003,20 | 0 |
| ENSG00000178685 | PARP10   | 8  | 143977153 | 144012772 | protein_coding | 1000,60 | 0 |
| ENSG00000168283 | BMI1     | 10 | 22321211  | 22331484  | protein_coding | 996,59  | 0 |
| ENSG00000109321 | AREG     | 4  | 74445134  | 74455009  | protein_coding | 985,95  | 0 |
| ENSG00000173621 | LRFN4    | 11 | 66856647  | 66860475  | protein_coding | 985,40  | 0 |
| ENSG00000163359 | COL6A3   | 2  | 237324003 | 237414375 | protein_coding | 976,79  | 0 |
| ENSG00000006283 | CACNA1G  | 17 | 50561068  | 50627474  | protein_coding | 974,10  | 0 |
| ENSG00000091972 | CD200    | 3  | 112332347 | 112362812 | protein_coding | 971,40  | 0 |
| ENSG00000039523 | FAM65A   | 16 | 67518418  | 67546788  | protein_coding | 967,10  | 0 |
| ENSG00000175592 | FOSL1    | 11 | 65892049  | 65900573  | protein_coding | 965,75  | 0 |
| ENSG00000158769 | F11R     | 1  | 160995211 | 161021348 | protein_coding | 963,10  | 0 |
| ENSG00000171551 | ECEL1    | 2  | 232479827 | 232487828 | protein_coding | 958,60  | 0 |
| ENSG00000126458 | RRAS     | 19 | 49635292  | 49640201  | protein_coding | 954,54  | 0 |
| ENSG00000140274 | DUOXA2   | 15 | 45114321  | 45118421  | protein_coding | 953,10  | 0 |
| ENSG00000136147 | PHF11    | 13 | 49495610  | 49528987  | protein_coding | 951,90  | 0 |
| ENSG00000171557 | FGG      | 4  | 154604134 | 154612967 | protein_coding | 950,20  | 0 |
| ENSG00000131069 | ACSS2    | 20 | 34872146  | 34927962  | protein_coding | 947,91  | 0 |
| ENSG00000113369 | ARRDC3   | 5  | 91368724  | 91383359  | protein_coding | 940,24  | 0 |
| ENSG00000101160 | CTSZ     | 20 | 58995185  | 59007247  | protein_coding | 939,43  | 0 |
| ENSG00000102119 | EMD      | X  | 154379197 | 154381523 | protein_coding | 925,54  | 0 |
| ENSG00000163297 | ANTXR2   | 4  | 79901149  | 80125454  | protein_coding | 924,66  | 0 |
| ENSG00000153071 | DAB2     | 5  | 39371675  | 39462300  | protein_coding | 923,00  | 0 |
| ENSG00000067445 | TRO      | X  | 54920462  | 54931431  | protein_coding | 921,90  | 0 |
| ENSG00000179431 | FJX1     | 11 | 35618419  | 35620868  | protein_coding | 921,36  | 0 |
| ENSG00000173083 | HPSE     | 4  | 83292461  | 83335153  | protein_coding | 918,40  | 0 |
| ENSG00000160796 | NBEAL2   | 3  | 46979683  | 47009703  | protein_coding | 916,90  | 0 |
| ENSG00000117228 | GBP1     | 1  | 89052319  | 89065360  | protein_coding | 916,90  | 0 |
| ENSG00000141526 | SLC16A3  | 17 | 82228397  | 82261129  | protein_coding | 915,33  | 0 |

|                 |         |    |           |           |                |        |   |
|-----------------|---------|----|-----------|-----------|----------------|--------|---|
| ENSG00000123342 | MMP19   | 12 | 55835433  | 55842966  | protein_coding | 914,67 | 0 |
| ENSG00000163347 | CLDN1   | 3  | 190305701 | 190322475 | protein_coding | 914,40 | 0 |
| ENSG00000006042 | TMEM98  | 17 | 32927910  | 32945106  | protein_coding | 914,30 | 0 |
| ENSG00000163694 | RBM47   | 4  | 40423267  | 40630875  | protein_coding | 912,80 | 0 |
| ENSG00000177679 | SRRM3   | 7  | 76201900  | 76287288  | protein_coding | 912,70 | 0 |
| ENSG00000153443 | UBALD1  | 16 | 4608883   | 4615027   | protein_coding | 910,58 | 0 |
| ENSG00000161513 | FDXR    | 17 | 74862497  | 74873031  | protein_coding | 910,46 | 0 |
| ENSG00000131471 | AOC3    | 17 | 42851184  | 42858130  | protein_coding | 906,48 | 0 |
| ENSG00000197457 | STMN3   | 20 | 63639705  | 63657682  | protein_coding | 904,75 | 0 |
| ENSG00000104899 | AMH     | 19 | 2249309   | 2252073   | protein_coding | 904,60 | 0 |
| ENSG00000008056 | SYN1    | X  | 47571898  | 47619853  | protein_coding | 903,35 | 0 |
| ENSG00000114019 | AMOTL2  | 3  | 134355874 | 134375479 | protein_coding | 901,92 | 0 |
| ENSG00000146067 | FAM193B | 5  | 177519788 | 177554541 | protein_coding | 901,56 | 0 |
| ENSG00000136167 | LCP1    | 13 | 46125920  | 46211871  | protein_coding | 899,75 | 0 |
| ENSG00000129566 | TEP1    | 14 | 20365667  | 20413429  | protein_coding | 895,80 | 0 |
| ENSG00000173706 | HEG1    | 3  | 124965710 | 125055958 | protein_coding | 893,38 | 0 |
| ENSG00000112763 | BTN2A1  | 6  | 26457904  | 26476621  | protein_coding | 892,60 | 0 |
| ENSG00000013288 | MAN2B2  | 4  | 6575175   | 6623362   | protein_coding | 892,37 | 0 |
| ENSG00000151176 | PLBD2   | 12 | 113358566 | 113391625 | protein_coding | 887,74 | 0 |
| ENSG00000181104 | F2R     | 5  | 76716043  | 76735781  | protein_coding | 886,60 | 0 |
| ENSG00000118503 | TNFAIP3 | 6  | 137867188 | 137883312 | protein_coding | 880,09 | 0 |
| ENSG00000184254 | ALDH1A3 | 15 | 100877714 | 100916626 | protein_coding | 877,60 | 0 |
| ENSG00000144057 | ST6GAL2 | 2  | 106801600 | 106887108 | protein_coding | 877,40 | 0 |
| ENSG00000119508 | NR4A3   | 9  | 99821855  | 99866891  | protein_coding | 874,60 | 0 |
| ENSG00000178467 | P4HTM   | 3  | 48989886  | 49007154  | protein_coding | 873,60 | 0 |
| ENSG00000111859 | NEDD9   | 6  | 11183298  | 11382348  | protein_coding | 871,40 | 0 |
| ENSG00000143622 | RIT1    | 1  | 155897808 | 155911404 | protein_coding | 868,09 | 0 |
| ENSG00000112419 | PHACTR2 | 6  | 143536845 | 143831185 | protein_coding | 867,14 | 0 |
| ENSG00000213949 | ITGA1   | 5  | 52787896  | 52959210  | protein_coding | 865,59 | 0 |
| ENSG00000126522 | ASL     | 7  | 66075798  | 66093558  | protein_coding | 865,50 | 0 |
| ENSG00000116574 | RHOU    | 1  | 228735077 | 228746669 | protein_coding | 862,59 | 0 |
| ENSG00000143344 | RGL1    | 1  | 183636085 | 183928531 | protein_coding | 855,55 | 0 |
| ENSG00000185201 | IFITM2  | 11 | 307631    | 315272    | protein_coding | 853,21 | 0 |
| ENSG00000179532 | DNHD1   | 11 | 6497260   | 6593758   | protein_coding | 852,75 | 0 |
| ENSG00000100911 | PSME2   | 14 | 24143362  | 24147570  | protein_coding | 848,09 | 0 |
| ENSG00000142552 | RCN3    | 19 | 49527618  | 49546962  | protein_coding | 847,90 | 0 |
| ENSG00000125931 | CITED1  | X  | 72301638  | 72307187  | protein_coding | 847,40 | 0 |
| ENSG00000105974 | CAV1    | 7  | 116524785 | 116561184 | protein_coding | 847,00 | 0 |
| ENSG00000070404 | FSTL3   | 19 | 676365    | 683399    | protein_coding | 845,20 | 0 |
| ENSG0000018408  | WWTR1   | 3  | 149517235 | 149736714 | protein_coding | 844,43 | 0 |
| ENSG00000100234 | TIMP3   | 22 | 32801701  | 32863043  | protein_coding | 844,32 | 0 |
| ENSG00000073060 | SCARB1  | 12 | 124776856 | 124882668 | protein_coding | 840,57 | 0 |
| ENSG00000204264 | PSMB8   | 6  | 32840717  | 32844703  | protein_coding | 834,50 | 0 |
| ENSG00000099326 | MZF1    | 19 | 58561931  | 58573575  | protein_coding | 833,10 | 0 |
| ENSG00000188641 | DPYD    | 1  | 97077743  | 97921049  | protein_coding | 829,26 | 0 |
| ENSG00000100445 | SDR39U1 | 14 | 24439766  | 24442905  | protein_coding | 828,30 | 0 |
| ENSG00000118515 | SGK1    | 6  | 134169246 | 134318112 | protein_coding | 825,25 | 0 |
| ENSG00000134755 | DSC2    | 18 | 31058840  | 31102415  | protein_coding | 821,70 | 0 |
| ENSG00000168916 | ZNF608  | 5  | 124636913 | 124748807 | protein_coding | 813,10 | 0 |
| ENSG00000130303 | BST2    | 19 | 17402939  | 17405648  | protein_coding | 811,10 | 0 |
| ENSG00000122824 | NUDT10  | X  | 51332231  | 51337525  | protein_coding | 809,73 | 0 |
| ENSG00000119900 | OGFRL1  | 6  | 71288803  | 71308950  | protein_coding | 802,91 | 0 |
| ENSG00000089597 | GANAB   | 11 | 62624826  | 62646726  | protein_coding | 799,96 | 0 |
| ENSG00000162302 | RPS6KA4 | 11 | 64359148  | 64372215  | protein_coding | 799,20 | 0 |
| ENSG00000096696 | DSP     | 6  | 7541575   | 7586717   | protein_coding | 794,78 | 0 |
| ENSG00000141696 | P3H4    | 17 | 41801947  | 41812604  | protein_coding | 791,40 | 0 |
| ENSG00000035681 | NSMAF   | 8  | 58583504  | 58659844  | protein_coding | 786,31 | 0 |
| ENSG00000167508 | MVD     | 16 | 88651935  | 88663161  | protein_coding | 785,31 | 0 |

|                 |           |    |           |           |                |        |   |
|-----------------|-----------|----|-----------|-----------|----------------|--------|---|
| ENSG00000198624 | CCDC69    | 5  | 151181052 | 151224145 | protein_coding | 785,03 | 0 |
| ENSG00000103257 | SLC7A5    | 16 | 87830023  | 87869488  | protein_coding | 784,06 | 0 |
| ENSG00000186919 | ZACN      | 17 | 76071961  | 76083666  | protein_coding | 782,69 | 0 |
| ENSG00000174640 | SLCO2A1   | 3  | 133932696 | 134052184 | protein_coding | 780,75 | 0 |
| ENSG00000115884 | SDC1      | 2  | 20200797  | 20225433  | protein_coding | 778,10 | 0 |
| ENSG00000164050 | PLXNB1    | 3  | 48403854  | 48430051  | protein_coding | 776,80 | 0 |
| ENSG00000165168 | CYBB      | X  | 37780011  | 37813461  | protein_coding | 775,80 | 0 |
| ENSG00000108963 | DPH1      | 17 | 2030110   | 2043430   | protein_coding | 774,40 | 0 |
| ENSG00000196878 | LAMB3     | 1  | 209614870 | 209652466 | protein_coding | 773,10 | 0 |
| ENSG00000159674 | SPON2     | 4  | 1166932   | 1208962   | protein_coding | 771,97 | 0 |
| ENSG00000134138 | MEIS2     | 15 | 36889204  | 37101299  | protein_coding | 771,62 | 0 |
| ENSG00000102181 | CD99L2    | X  | 150766337 | 150898816 | protein_coding | 771,61 | 0 |
| ENSG00000256043 | CTSO      | 4  | 155924118 | 155953917 | protein_coding | 768,50 | 0 |
| ENSG00000162734 | PEA15     | 1  | 160205337 | 160215376 | protein_coding | 766,86 | 0 |
| ENSG00000160408 | ST6GALNAC | 9  | 127885321 | 127905408 | protein_coding | 764,15 | 0 |
| ENSG00000168386 | FILIP1L   | 3  | 99830141  | 100114513 | protein_coding | 761,90 | 0 |
| ENSG00000159899 | NPR2      | 9  | 35792154  | 35809732  | protein_coding | 761,09 | 0 |
| ENSG00000132669 | RIN2      | 20 | 19886521  | 20002457  | protein_coding | 759,69 | 0 |
| ENSG00000138735 | PDE5A     | 4  | 119494395 | 119628991 | protein_coding | 752,62 | 0 |
| ENSG00000198833 | UBE2J1    | 6  | 89326625  | 89352848  | protein_coding | 748,09 | 0 |
| ENSG00000004799 | PDK4      | 7  | 95583499  | 95596491  | protein_coding | 747,10 | 0 |
| ENSG00000162511 | LAPTM5    | 1  | 30732469  | 30757820  | protein_coding | 747,00 | 0 |
| ENSG00000111275 | ALDH2     | 12 | 111766887 | 111817529 | protein_coding | 743,86 | 0 |
| ENSG00000144579 | CTDSP1    | 2  | 218398256 | 218405941 | protein_coding | 743,58 | 0 |
| ENSG00000133800 | LYVE1     | 11 | 10556966  | 10611689  | protein_coding | 742,00 | 0 |
| ENSG00000198932 | GPRASP1   | X  | 102651366 | 102659083 | protein_coding | 741,00 | 0 |
| ENSG00000142156 | COL6A1    | 21 | 45981737  | 46005050  | protein_coding | 740,87 | 0 |
| ENSG00000137267 | TUBB2A    | 6  | 3153669   | 3157526   | protein_coding | 740,14 | 0 |
| ENSG00000106483 | SFRP4     | 7  | 37905932  | 38025695  | protein_coding | 730,40 | 0 |
| ENSG00000196159 | FAT4      | 4  | 125316399 | 125492932 | protein_coding | 730,10 | 0 |
| ENSG00000101955 | SRPX      | X  | 38149336  | 38220924  | protein_coding | 729,83 | 0 |
| ENSG00000171517 | LPAR3     | 1  | 84811602  | 84893213  | protein_coding | 729,80 | 0 |
| ENSG00000162873 | KLHDC8A   | 1  | 205336065 | 205357090 | protein_coding | 728,00 | 0 |
| ENSG00000184867 | ARMCX2    | X  | 101655281 | 101659891 | protein_coding | 725,80 | 0 |
| ENSG00000125848 | FLRT3     | 20 | 14322988  | 14337616  | protein_coding | 724,80 | 0 |
| ENSG00000114923 | SLC4A3    | 2  | 219627327 | 219641980 | protein_coding | 721,55 | 0 |
| ENSG00000135625 | EGR4      | 2  | 73290929  | 73293705  | protein_coding | 718,00 | 0 |
| ENSG00000134531 | EMP1      | 12 | 13196716  | 13219939  | protein_coding | 717,60 | 0 |
| ENSG00000146112 | PPP1R18   | 6  | 30676389  | 30687895  | protein_coding | 713,59 | 0 |
| ENSG00000115461 | IGFBP5    | 2  | 216672105 | 216695525 | protein_coding | 712,29 | 0 |
| ENSG00000099377 | HSD3B7    | 16 | 30985207  | 30989152  | protein_coding | 710,20 | 0 |
| ENSG00000115155 | OTOF      | 2  | 26457203  | 26558698  | protein_coding | 708,50 | 0 |
| ENSG00000103154 | NECAB2    | 16 | 83968632  | 84002776  | protein_coding | 705,73 | 0 |
| ENSG00000203963 | C1orf141  | 1  | 67092165  | 67231853  | protein_coding | 702,00 | 0 |
| ENSG00000100439 | ABHD4     | 14 | 22598237  | 22613215  | protein_coding | 700,92 | 0 |
| ENSG00000116584 | ARHGEF2   | 1  | 155946851 | 156007070 | protein_coding | 699,30 | 0 |
| ENSG00000026103 | FAS       | 10 | 88990531  | 89015785  | protein_coding | 696,00 | 0 |
| ENSG00000013297 | CLDN11    | 3  | 170418865 | 170860380 | protein_coding | 695,45 | 0 |
| ENSG00000177943 | MAMDC4    | 9  | 136850943 | 136860799 | protein_coding | 695,00 | 0 |
| ENSG00000182752 | PAPPA     | 9  | 116153804 | 116402322 | protein_coding | 694,78 | 0 |
| ENSG00000237441 | RGL2      | 6  | 33291654  | 33299324  | protein_coding | 694,59 | 0 |
| ENSG00000138615 | CILP      | 15 | 65194758  | 65211488  | protein_coding | 693,67 | 0 |
| ENSG00000025708 | TYMP      | 22 | 50525752  | 50530056  | protein_coding | 693,30 | 0 |
| ENSG00000130513 | GDF15     | 19 | 18374731  | 18389176  | protein_coding | 692,18 | 0 |
| ENSG00000168477 | TNXB      | 6  | 32041154  | 32115334  | protein_coding | 690,90 | 0 |
| ENSG00000185924 | RTN4RL1   | 17 | 1934677   | 2025345   | protein_coding | 685,90 | 0 |
| ENSG00000153029 | MR1       | 1  | 181033425 | 181061938 | protein_coding | 685,60 | 0 |
| ENSG00000152092 | ASTN1     | 1  | 176857302 | 177164973 | protein_coding | 684,80 | 0 |



|                 |          |    |           |           |                |        |   |
|-----------------|----------|----|-----------|-----------|----------------|--------|---|
| ENSG00000126947 | ARMCX1   | X  | 101550531 | 101554700 | protein_coding | 684,10 | 0 |
| ENSG00000147140 | NONO     | X  | 71283192  | 71301168  | protein_coding | 682,24 | 0 |
| ENSG00000143768 | LEFTY2   | 1  | 225936598 | 225941489 | protein_coding | 679,90 | 0 |
| ENSG00000204520 | MICA     | 6  | 31399784  | 31415315  | protein_coding | 677,70 | 0 |
| ENSG00000143869 | GDF7     | 2  | 20666664  | 20679245  | protein_coding | 675,90 | 0 |
| ENSG00000142669 | SH3BGL3  | 1  | 26279176  | 26281522  | protein_coding | 674,00 | 0 |
| ENSG00000147576 | ADHFE1   | 8  | 66430185  | 66471601  | protein_coding | 673,40 | 0 |
| ENSG00000102178 | UBL4A    | X  | 154483717 | 154486670 | protein_coding | 673,10 | 0 |
| ENSG00000101199 | ARFGAP1  | 20 | 63272785  | 63289793  | protein_coding | 672,61 | 0 |
| ENSG00000068079 | IFI35    | 17 | 43006725  | 43014456  | protein_coding | 672,10 | 0 |
| ENSG00000213462 | ERV3-1   | 7  | 64990809  | 65006743  | protein_coding | 672,10 | 0 |
| ENSG00000244734 | HBB      | 11 | 5225464   | 5229395   | protein_coding | 670,30 | 0 |
| ENSG00000071889 | FAM3A    | X  | 154506159 | 154516242 | protein_coding | 670,15 | 0 |
| ENSG00000085719 | CPNE3    | 8  | 86484830  | 86561498  | protein_coding | 665,05 | 0 |
| ENSG00000185149 | NPY2R    | 4  | 155208629 | 155217078 | protein_coding | 663,10 | 0 |
| ENSG00000073737 | DHRS9    | 2  | 169064789 | 169096167 | protein_coding | 662,91 | 0 |
| ENSG00000196411 | EPHB4    | 7  | 100802565 | 100827521 | protein_coding | 662,80 | 0 |
| ENSG00000197283 | SYNGAP1  | 6  | 33420070  | 33457541  | protein_coding | 662,45 | 0 |
| ENSG00000173281 | PPP1R3B  | 8  | 9136255   | 9151574   | protein_coding | 662,28 | 0 |
| ENSG00000087077 | TRIP6    | 7  | 100867138 | 100873454 | protein_coding | 661,04 | 0 |
| ENSG00000214021 | TTL3     | 3  | 9808086   | 9855138   | protein_coding | 660,86 | 0 |
| ENSG00000167615 | LENG8    | 19 | 54448887  | 54462037  | protein_coding | 660,38 | 0 |
| ENSG00000167543 | TP53I13  | 17 | 29566052  | 29573157  | protein_coding | 657,10 | 0 |
| ENSG00000167925 | GHDC     | 17 | 42188799  | 42194532  | protein_coding | 656,90 | 0 |
| ENSG00000135083 | CCNJL    | 5  | 160251652 | 160345396 | protein_coding | 656,20 | 0 |
| ENSG00000005238 | FAM214B  | 9  | 35104112  | 35116341  | protein_coding | 654,27 | 0 |
| ENSG00000105971 | CAV2     | 7  | 116287380 | 116508541 | protein_coding | 654,11 | 0 |
| ENSG00000198108 | CHSY3    | 5  | 129904472 | 130186634 | protein_coding | 653,50 | 0 |
| ENSG00000071655 | MBD3     | 19 | 1573596   | 1592801   | protein_coding | 652,93 | 0 |
| ENSG00000140553 | UNC45A   | 15 | 90930180  | 90954093  | protein_coding | 652,75 | 0 |
| ENSG00000230657 | PRB4     | 12 | 11307083  | 11310435  | protein_coding | 652,50 | 0 |
| ENSG00000125817 | CENPB    | 20 | 3783851   | 3786690   | protein_coding | 651,61 | 0 |
| ENSG00000175899 | A2M      | 12 | 9067664   | 9116229   | protein_coding | 649,50 | 0 |
| ENSG00000133083 | DCLK1    | 13 | 35768652  | 36131306  | protein_coding | 645,80 | 0 |
| ENSG00000213366 | GSTM2    | 1  | 109668022 | 109709551 | protein_coding | 645,40 | 0 |
| ENSG00000140691 | ARMC5    | 16 | 31458080  | 31467166  | protein_coding | 645,00 | 0 |
| ENSG00000077713 | SLC25A43 | X  | 119399060 | 119454478 | protein_coding | 641,18 | 0 |
| ENSG00000148730 | EIF4EBP2 | 10 | 70404379  | 70428618  | protein_coding | 640,89 | 0 |
| ENSG00000175602 | CCDC85B  | 11 | 65890112  | 65891635  | protein_coding | 640,00 | 0 |
| ENSG00000138449 | SLC40A1  | 2  | 189560579 | 189583758 | protein_coding | 637,90 | 0 |
| ENSG00000120594 | PLXDC2   | 10 | 19816239  | 20289856  | protein_coding | 636,88 | 0 |
| ENSG00000118785 | SPP1     | 4  | 87975650  | 87983426  | protein_coding | 636,50 | 0 |
| ENSG00000141736 | ERBB2    | 17 | 39687914  | 39730426  | protein_coding | 635,95 | 0 |
| ENSG00000137869 | CYP19A1  | 15 | 51208057  | 51338610  | protein_coding | 633,73 | 0 |
| ENSG00000162378 | ZYG11B   | 1  | 52726467  | 52827342  | protein_coding | 633,56 | 0 |
| ENSG00000093010 | COMT     | 22 | 19941607  | 19969975  | protein_coding | 633,03 | 0 |
| ENSG00000231389 | HLA-DPA1 | 6  | 33064569  | 33080775  | protein_coding | 630,90 | 0 |
| ENSG00000157214 | STEAP2   | 7  | 90167590  | 90238137  | protein_coding | 630,50 | 0 |
| ENSG00000132274 | TRIM22   | 11 | 5689689   | 5737089   | protein_coding | 630,40 | 0 |
| ENSG00000174808 | BTC      | 4  | 74744759  | 74794686  | protein_coding | 628,80 | 0 |
| ENSG00000239713 | APOBEC3G | 22 | 39040961  | 39087743  | protein_coding | 626,80 | 0 |
| ENSG00000157873 | TNFRSF14 | 1  | 2555639   | 2565382   | protein_coding | 625,70 | 0 |
| ENSG00000169083 | AR       | X  | 67544032  | 67730619  | protein_coding | 623,50 | 0 |
| ENSG00000155287 | SLC25A28 | 10 | 99610522  | 99620609  | protein_coding | 621,69 | 0 |
| ENSG00000177732 | SOX12    | 20 | 325401    | 330224    | protein_coding | 621,41 | 0 |
| ENSG00000163932 | PRKCD    | 3  | 53156009  | 53192717  | protein_coding | 620,74 | 0 |
| ENSG00000140400 | MAN2C1   | 15 | 75355207  | 75368630  | protein_coding | 619,91 | 0 |
| ENSG00000114841 | DNAH1    | 3  | 52316319  | 52400491  | protein_coding | 618,17 | 0 |

|                 |          |    |           |           |                |        |   |
|-----------------|----------|----|-----------|-----------|----------------|--------|---|
| ENSG00000182179 | UBA7     | 3  | 49805207  | 49813946  | protein_coding | 616,10 | 0 |
| ENSG00000120708 | TGFBI    | 5  | 136028895 | 136063818 | protein_coding | 615,80 | 0 |
| ENSG00000067082 | KLF6     | 10 | 3775996   | 3785281   | protein_coding | 615,53 | 0 |
| ENSG00000180155 | LYNX1    | 8  | 142764334 | 142778224 | protein_coding | 615,40 | 0 |
| ENSG00000177575 | CD163    | 12 | 7470813   | 7503893   | protein_coding | 610,60 | 0 |
| ENSG00000147650 | LRP12    | 8  | 104489231 | 104589024 | protein_coding | 610,37 | 0 |
| ENSG00000162733 | DDR2     | 1  | 162631373 | 162787400 | protein_coding | 606,49 | 0 |
| ENSG00000140479 | PCSK6    | 15 | 101297142 | 101525202 | protein_coding | 604,85 | 0 |
| ENSG00000176170 | SPHK1    | 17 | 76376584  | 76387860  | protein_coding | 602,50 | 0 |
| ENSG00000180304 | OAZ2     | 15 | 64687573  | 64703281  | protein_coding | 601,33 | 0 |
| ENSG00000096060 | FKBP5    | 6  | 35573585  | 35728583  | protein_coding | 601,13 | 0 |
| ENSG00000177225 | PDDC1    | 11 | 767220    | 777488    | protein_coding | 601,00 | 0 |
| ENSG00000130449 | ZSWIM6   | 5  | 61332273  | 61546170  | protein_coding | 600,40 | 0 |
| ENSG00000167107 | ACSF2    | 17 | 50426158  | 50474845  | protein_coding | 599,60 | 0 |
| ENSG00000064205 | WISP2    | 20 | 44714844  | 44728509  | protein_coding | 599,52 | 0 |
| ENSG00000105429 | MEGF8    | 19 | 42325609  | 42378769  | protein_coding | 594,53 | 0 |
| ENSG00000125384 | PTGER2   | 14 | 52314305  | 52328606  | protein_coding | 593,30 | 0 |
| ENSG00000099960 | SLC7A4   | 22 | 21028718  | 21032840  | protein_coding | 591,70 | 0 |
| ENSG00000115129 | TP53I3   | 2  | 24077433  | 24085861  | protein_coding | 590,70 | 0 |
| ENSG00000137460 | FHDC1    | 4  | 152936352 | 152979696 | protein_coding | 590,55 | 0 |
| ENSG00000118762 | PKD2     | 4  | 88007668  | 88077777  | protein_coding | 589,10 | 0 |
| ENSG00000162687 | KCNT2    | 1  | 196225779 | 196609225 | protein_coding | 587,50 | 0 |
| ENSG00000176046 | NUPR1    | 16 | 28532708  | 28539174  | protein_coding | 586,10 | 0 |
| ENSG00000093072 | CECR1    | 22 | 17178790  | 17221989  | protein_coding | 584,50 | 0 |
| ENSG00000177628 | GBA      | 1  | 155234452 | 155244699 | protein_coding | 584,50 | 0 |
| ENSG00000183741 | CBX6     | 22 | 38861450  | 38872314  | protein_coding | 580,13 | 0 |
| ENSG00000132535 | DLG4     | 17 | 7189890   | 7219702   | protein_coding | 580,10 | 0 |
| ENSG00000220205 | VAMP2    | 17 | 8159149   | 8163546   | protein_coding | 577,12 | 0 |
| ENSG00000162241 | SLC25A45 | 11 | 65375192  | 65383701  | protein_coding | 576,69 | 0 |
| ENSG00000189077 | TMEM120A | 7  | 75986837  | 75994659  | protein_coding | 575,92 | 0 |
| ENSG00000151883 | PARP8    | 5  | 50665899  | 50846522  | protein_coding | 573,70 | 0 |
| ENSG00000177432 | NAP1L5   | 4  | 88695915  | 88698235  | protein_coding | 572,50 | 0 |
| ENSG00000197496 | SLC2A10  | 20 | 46709487  | 46736347  | protein_coding | 571,10 | 0 |
| ENSG00000135452 | TSPAN31  | 12 | 57738013  | 57750211  | protein_coding | 570,58 | 0 |
| ENSG00000154262 | ABCA6    | 17 | 69078702  | 69141888  | protein_coding | 570,38 | 0 |
| ENSG00000106605 | BLVRA    | 7  | 43758680  | 43807342  | protein_coding | 570,30 | 0 |
| ENSG00000182492 | BGN      | X  | 153494939 | 153509554 | protein_coding | 568,70 | 0 |
| ENSG00000131981 | LGALS3   | 14 | 55124110  | 55145413  | protein_coding | 568,65 | 0 |
| ENSG00000067066 | SP100    | 2  | 230415942 | 230544090 | protein_coding | 568,29 | 0 |
| ENSG00000173442 | EHBP1L1  | 11 | 65576038  | 65592650  | protein_coding | 566,60 | 0 |
| ENSG00000103264 | FBXO31   | 16 | 87326987  | 87392142  | protein_coding | 566,57 | 0 |
| ENSG00000124253 | PCK1     | 20 | 57561080  | 57568112  | protein_coding | 564,70 | 0 |
| ENSG00000165891 | E2F7     | 12 | 77021247  | 77065580  | protein_coding | 563,19 | 0 |
| ENSG00000160959 | LRRC14   | 8  | 144517992 | 144525178 | protein_coding | 562,81 | 0 |
| ENSG00000184384 | MAML2    | 11 | 95976598  | 96343180  | protein_coding | 562,05 | 0 |
| ENSG00000010704 | HFE      | 6  | 26087281  | 26098343  | protein_coding | 560,60 | 0 |
| ENSG00000198286 | CARD11   | 7  | 2906141   | 3043945   | protein_coding | 560,20 | 0 |
| ENSG00000110237 | ARHGEF17 | 11 | 73308289  | 73369091  | protein_coding | 559,24 | 0 |
| ENSG00000140254 | DUOXA1   | 15 | 45117367  | 45129938  | protein_coding | 558,10 | 0 |
| ENSG00000111344 | RASAL1   | 12 | 113098819 | 113136239 | protein_coding | 557,60 | 0 |
| ENSG00000148677 | ANKRD1   | 10 | 90912096  | 90921276  | protein_coding | 557,30 | 0 |
| ENSG00000277443 | MARCKS   | 6  | 113857362 | 113863471 | protein_coding | 556,77 | 0 |
| ENSG00000165215 | CLDN3    | 7  | 73768997  | 73770270  | protein_coding | 555,80 | 0 |
| ENSG00000197355 | UAP1L1   | 9  | 137077501 | 137084539 | protein_coding | 554,50 | 0 |
| ENSG00000076928 | ARHGEF1  | 19 | 41883161  | 41930150  | protein_coding | 553,53 | 0 |
| ENSG00000204439 | C6orf47  | 6  | 31658298  | 31660772  | protein_coding | 551,40 | 0 |
| ENSG00000115226 | FNDC4    | 2  | 27491883  | 27495245  | protein_coding | 551,35 | 0 |
| ENSG00000156869 | FRRS1    | 1  | 99708703  | 99766631  | protein_coding | 550,70 | 0 |

|                 |            |    |           |           |                |        |   |
|-----------------|------------|----|-----------|-----------|----------------|--------|---|
| ENSG00000168310 | IRF2       | 4  | 184387713 | 184474580 | protein_coding | 549,89 | 0 |
| ENSG00000129103 | SUMF2      | 7  | 56064002  | 56080670  | protein_coding | 549,52 | 0 |
| ENSG00000165633 | VSTM4      | 10 | 49014245  | 49115509  | protein_coding | 549,10 | 0 |
| ENSG00000123595 | RAB9A      | X  | 13689121  | 13710506  | protein_coding | 546,38 | 0 |
| ENSG00000130518 | KIAA1683   | 19 | 18257097  | 18274509  | protein_coding | 543,60 | 0 |
| ENSG00000144815 | NXPE3      | 3  | 101779202 | 101828229 | protein_coding | 543,22 | 0 |
| ENSG00000124067 | SLC12A4    | 16 | 67943474  | 67969601  | protein_coding | 541,21 | 0 |
| ENSG00000149591 | TAGLN      | 11 | 117199321 | 117204782 | protein_coding | 541,20 | 0 |
| ENSG00000183337 | BCOR       | X  | 40049815  | 40177329  | protein_coding | 541,00 | 0 |
| ENSG00000006118 | TMEM132A   | 11 | 60924463  | 60937159  | protein_coding | 538,31 | 0 |
| ENSG00000196123 | KIAA0895L  | 16 | 67175602  | 67184040  | protein_coding | 537,74 | 0 |
| ENSG00000114251 | WNT5A      | 3  | 55465715  | 55490539  | protein_coding | 537,38 | 0 |
| ENSG00000075399 | VPS9D1     | 16 | 89707134  | 89720986  | protein_coding | 533,88 | 0 |
| ENSG00000166886 | NAB2       | 12 | 57088894  | 57095476  | protein_coding | 533,75 | 0 |
| ENSG00000152926 | ZNF117     | 7  | 64971776  | 65006684  | protein_coding | 533,52 | 0 |
| ENSG00000011478 | QPCTL      | 19 | 45692483  | 45703989  | protein_coding | 532,70 | 0 |
| ENSG00000198959 | TGM2       | 20 | 38127387  | 38166578  | protein_coding | 532,40 | 0 |
| ENSG00000138134 | STAMBPL1   | 10 | 88879734  | 88975153  | protein_coding | 530,90 | 0 |
| ENSG00000214193 | SH3D21     | 1  | 36306387  | 36324886  | protein_coding | 529,36 | 0 |
| ENSG00000119314 | PTBP3      | 9  | 112217716 | 112333667 | protein_coding | 526,89 | 0 |
| ENSG00000169604 | ANTXR1     | 2  | 69013178  | 69249327  | protein_coding | 526,25 | 0 |
| ENSG00000115107 | STEAP3     | 2  | 119223831 | 119265652 | protein_coding | 526,10 | 0 |
| ENSG00000213722 | DDAH2      | 6  | 31727038  | 31730617  | protein_coding | 525,76 | 0 |
| ENSG00000156466 | GDF6       | 8  | 96142330  | 96160792  | protein_coding | 525,09 | 0 |
| ENSG00000110697 | PITPNM1    | 11 | 67491768  | 67506263  | protein_coding | 525,00 | 0 |
| ENSG00000149809 | TM7SF2     | 11 | 65111845  | 65116384  | protein_coding | 524,40 | 0 |
| ENSG00000105204 | DYRK1B     | 19 | 39825350  | 39834201  | protein_coding | 523,90 | 0 |
| ENSG00000101665 | SMAD7      | 18 | 48919853  | 48950711  | protein_coding | 523,70 | 0 |
| ENSG00000163898 | LIPH       | 3  | 185506262 | 185552613 | protein_coding | 523,55 | 0 |
| ENSG00000138039 | LHCGR      | 2  | 48686775  | 48755730  | protein_coding | 523,10 | 0 |
| ENSG00000174233 | ADCY6      | 12 | 48766194  | 48789037  | protein_coding | 522,55 | 0 |
| ENSG00000088899 | ENSG000000 | 20 | 3162617   | 3173592   | protein_coding | 521,92 | 0 |
| ENSG00000149131 | SERPING1   | 11 | 57597387  | 57614853  | protein_coding | 521,70 | 0 |
| ENSG00000186310 | NAP1L3     | X  | 93670930  | 93673568  | protein_coding | 521,60 | 0 |
| ENSG00000167552 | TUBA1A     | 12 | 49184796  | 49189324  | protein_coding | 521,49 | 0 |
| ENSG00000114270 | COL7A1     | 3  | 48564073  | 48595267  | protein_coding | 520,69 | 0 |
| ENSG00000137124 | ALDH1B1    | 9  | 38392664  | 38398661  | protein_coding | 520,67 | 0 |
| ENSG00000105701 | FKBP8      | 19 | 18531751  | 18544077  | protein_coding | 520,51 | 0 |
| ENSG00000177613 | CSTF2T     | 10 | 51695487  | 51699591  | protein_coding | 518,12 | 0 |
| ENSG00000155252 | PI4K2A     | 10 | 97640686  | 97676434  | protein_coding | 518,00 | 0 |
| ENSG00000188157 | AGRN       | 1  | 1020123   | 1056118   | protein_coding | 516,68 | 0 |
| ENSG00000179862 | CITED4     | 1  | 40861051  | 40862366  | protein_coding | 515,06 | 0 |
| ENSG00000059804 | SLC2A3     | 12 | 7919230   | 7936275   | protein_coding | 514,47 | 0 |
| ENSG00000158301 | GPRASP2    | X  | 102712176 | 102717733 | protein_coding | 514,30 | 0 |
| ENSG00000162236 | STX5       | 11 | 62806897  | 62832088  | protein_coding | 512,80 | 0 |
| ENSG00000214026 | MRPL23     | 11 | 1947278   | 1984522   | protein_coding | 512,64 | 0 |
| ENSG00000160712 | IL6R       | 1  | 154405193 | 154469450 | protein_coding | 510,20 | 0 |
| ENSG00000189369 | GSPT2      | X  | 51743431  | 51746232  | protein_coding | 509,80 | 0 |
| ENSG00000014914 | MTMR11     | 1  | 149928651 | 149936898 | protein_coding | 508,82 | 0 |
| ENSG00000105137 | SYDE1      | 19 | 15107403  | 15114988  | protein_coding | 507,40 | 0 |
| ENSG00000184905 | TCEAL2     | X  | 102125688 | 102127711 | protein_coding | 506,90 | 0 |
| ENSG00000065357 | DGKA       | 12 | 55927319  | 55954027  | protein_coding | 505,79 | 0 |
| ENSG00000105135 | ILVBL      | 19 | 15114984  | 15125785  | protein_coding | 505,22 | 0 |
| ENSG00000173548 | SNX33      | 15 | 75647906  | 75662301  | protein_coding | 504,90 | 0 |
| ENSG00000159348 | CYB5R1     | 1  | 202961869 | 202967280 | protein_coding | 504,70 | 0 |
| ENSG00000155090 | KLF10      | 8  | 102648779 | 102655902 | protein_coding | 503,13 | 0 |
| ENSG00000173230 | GOLGB1     | 3  | 121663199 | 121749767 | protein_coding | 501,23 | 0 |
| ENSG00000173114 | LRRN3      | 7  | 111091006 | 111125454 | protein_coding | 498,40 | 0 |

|                 |          |    |           |           |                |        |   |
|-----------------|----------|----|-----------|-----------|----------------|--------|---|
| ENSG00000254470 | AP5B1    | 11 | 65775893  | 65780802  | protein_coding | 496,60 | 0 |
| ENSG00000196126 | HLA-DRB1 | 6  | 32552990  | 32589848  | protein_coding | 496,40 | 0 |
| ENSG00000183770 | FOXL2    | 3  | 138944224 | 138947140 | protein_coding | 495,90 | 0 |
| ENSG00000178252 | WDR6     | 3  | 49007062  | 49015953  | protein_coding | 494,23 | 0 |
| ENSG00000160255 | ITGB2    | 21 | 44885953  | 44931989  | protein_coding | 493,50 | 0 |
| ENSG00000176165 | FOXG1    | 14 | 28765388  | 28770277  | protein_coding | 492,50 | 0 |
| ENSG00000105329 | TGFB1    | 19 | 41301587  | 41353911  | protein_coding | 492,37 | 0 |
| ENSG00000105810 | CDK6     | 7  | 92604921  | 92836594  | protein_coding | 491,40 | 0 |
| ENSG00000186470 | BTN3A2   | 6  | 26365159  | 26378320  | protein_coding | 489,00 | 0 |
| ENSG00000103066 | PLA2G15  | 16 | 68245304  | 68261062  | protein_coding | 488,80 | 0 |
| ENSG00000099860 | GADD45B  | 19 | 2476122   | 2478259   | protein_coding | 488,46 | 0 |
| ENSG00000140939 | NOL3     | 16 | 67170154  | 67175735  | protein_coding | 486,86 | 0 |
| ENSG00000104936 | DMPK     | 19 | 45769717  | 45782552  | protein_coding | 486,76 | 0 |
| ENSG00000172315 | TP53RK   | 20 | 46684365  | 46689779  | protein_coding | 486,20 | 0 |
| ENSG00000117298 | ECE1     | 1  | 21217247  | 21345504  | protein_coding | 484,58 | 0 |
| ENSG00000163884 | KLF15    | 3  | 126342635 | 126357442 | protein_coding | 484,14 | 0 |
| ENSG00000179094 | PER1     | 17 | 8140472   | 8156506   | protein_coding | 483,70 | 0 |
| ENSG00000082684 | SEMA5B   | 3  | 122909193 | 123028605 | protein_coding | 482,90 | 0 |
| ENSG00000143147 | GPR161   | 1  | 168079543 | 168137667 | protein_coding | 481,92 | 0 |
| ENSG00000160683 | CXCR5    | 11 | 118883766 | 118897799 | protein_coding | 481,16 | 0 |
| ENSG00000055118 | KCNH2    | 7  | 150944961 | 150978315 | protein_coding | 480,08 | 0 |
| ENSG00000196155 | PLEKHG4  | 16 | 67277510  | 67289499  | protein_coding | 479,40 | 0 |
| ENSG00000177595 | PIDD1    | 11 | 799179    | 809753    | protein_coding | 479,23 | 0 |
| ENSG00000110455 | ACCS     | 11 | 44065925  | 44084222  | protein_coding | 479,10 | 0 |
| ENSG00000117335 | CD46     | 1  | 207752057 | 207795513 | protein_coding | 478,73 | 0 |
| ENSG00000057019 | DCBLD2   | 3  | 98795941  | 98901689  | protein_coding | 478,66 | 0 |
| ENSG00000164897 | TMUB1    | 7  | 151081080 | 151083546 | protein_coding | 477,79 | 0 |
| ENSG00000146373 | RNF217   | 6  | 124962545 | 125092633 | protein_coding | 476,80 | 0 |
| ENSG00000130066 | SAT1     | X  | 23783173  | 23786226  | protein_coding | 476,59 | 0 |
| ENSG00000184271 | POU6F1   | 12 | 51186936  | 51217693  | protein_coding | 476,10 | 0 |
| ENSG00000139266 | 09-mars  | 12 | 57755098  | 57760407  | protein_coding | 474,50 | 0 |
| ENSG00000100596 | SPTLC2   | 14 | 77505997  | 77616773  | protein_coding | 474,49 | 0 |
| ENSG00000051523 | CYBA     | 16 | 88643283  | 88651152  | protein_coding | 470,50 | 0 |
| ENSG00000163739 | CXCL1    | 4  | 73869393  | 73871242  | protein_coding | 470,40 | 0 |
| ENSG00000139567 | ACVRL1   | 12 | 51906908  | 51923361  | protein_coding | 469,60 | 0 |
| ENSG00000013619 | MAMLD1   | X  | 150361422 | 150514178 | protein_coding | 468,80 | 0 |
| ENSG00000137857 | DUOX1    | 15 | 45129933  | 45165576  | protein_coding | 468,70 | 0 |
| ENSG00000143847 | PPFIA4   | 1  | 203026498 | 203078740 | protein_coding | 465,20 | 0 |
| ENSG00000125810 | CD93     | 20 | 23079349  | 23086340  | protein_coding | 463,30 | 0 |
| ENSG00000109323 | MANBA    | 4  | 102631488 | 102760994 | protein_coding | 462,60 | 0 |
| ENSG00000164128 | NPY1R    | 4  | 163323961 | 163344832 | protein_coding | 461,50 | 0 |
| ENSG00000205413 | SAMD9    | 7  | 93099513  | 93118023  | protein_coding | 461,18 | 0 |
| ENSG00000137628 | DDX60    | 4  | 168216293 | 168318807 | protein_coding | 460,70 | 0 |
| ENSG00000121966 | CXCR4    | 2  | 136114349 | 136118165 | protein_coding | 460,62 | 0 |
| ENSG00000099999 | RNF215   | 22 | 30368811  | 30421771  | protein_coding | 460,50 | 0 |
| ENSG00000110628 | SLC22A18 | 11 | 2899721   | 2925246   | protein_coding | 458,70 | 0 |
| ENSG00000198354 | DCAF12L2 | X  | 126164531 | 126165951 | protein_coding | 457,80 | 0 |
| ENSG00000129925 | TMEM8A   | 16 | 370773    | 387113    | protein_coding | 457,34 | 0 |
| ENSG00000137872 | SEMA6D   | 15 | 47184101  | 47774223  | protein_coding | 456,91 | 0 |
| ENSG00000128335 | APOL2    | 22 | 36226203  | 36239954  | protein_coding | 456,70 | 0 |
| ENSG00000124479 | NDP      | X  | 43948776  | 43973504  | protein_coding | 455,40 | 0 |
| ENSG00000113108 | APBB3    | 5  | 140558268 | 140593752 | protein_coding | 455,33 | 0 |
| ENSG00000111676 | ATN1     | 12 | 6924463   | 6942321   | protein_coding | 455,17 | 0 |
| ENSG00000147174 | ACRC     | X  | 71578411  | 71613583  | protein_coding | 455,00 | 0 |
| ENSG00000171864 | PRND     | 20 | 4721910   | 4728460   | protein_coding | 454,60 | 0 |
| ENSG00000180447 | GAS1     | 9  | 86944363  | 86947189  | protein_coding | 454,50 | 0 |
| ENSG00000132821 | VSTM2L   | 20 | 37903104  | 37945350  | protein_coding | 453,50 | 0 |
| ENSG00000142686 | C1orf216 | 1  | 35713875  | 35719472  | protein_coding | 453,00 | 0 |

|                 |           |    |           |           |                |        |   |
|-----------------|-----------|----|-----------|-----------|----------------|--------|---|
| ENSG00000168758 | SEMA4C    | 2  | 96859716  | 96870757  | protein_coding | 450,10 | 0 |
| ENSG00000153294 | ADGRF4    | 6  | 47685864  | 47722021  | protein_coding | 449,90 | 0 |
| ENSG00000154655 | L3MBTL4   | 18 | 5954706   | 6415237   | protein_coding | 449,18 | 0 |
| ENSG00000159167 | STC1      | 8  | 23841915  | 23854807  | protein_coding | 447,80 | 0 |
| ENSG00000133142 | TCEAL4    | X  | 103576231 | 103587736 | protein_coding | 447,35 | 0 |
| ENSG00000103249 | CLCN7     | 16 | 1444934   | 1475580   | protein_coding | 446,64 | 0 |
| ENSG00000160072 | ATAD3B    | 1  | 1471769   | 1497848   | protein_coding | 446,54 | 0 |
| ENSG00000135046 | ANXA1     | 9  | 73151757  | 73170393  | protein_coding | 446,30 | 0 |
| ENSG00000158859 | ADAMTS4   | 1  | 161184308 | 161199056 | protein_coding | 445,00 | 0 |
| ENSG00000152583 | SPARCL1   | 4  | 87473335  | 87531061  | protein_coding | 444,90 | 0 |
| ENSG00000162692 | VCAM1     | 1  | 100719742 | 100739045 | protein_coding | 444,32 | 0 |
| ENSG00000218336 | TENM3     | 4  | 182143987 | 182803024 | protein_coding | 442,73 | 0 |
| ENSG00000164889 | SLC4A2    | 7  | 151057210 | 151076527 | protein_coding | 442,61 | 0 |
| ENSG00000125746 | EML2      | 19 | 45606994  | 45645629  | protein_coding | 442,27 | 0 |
| ENSG00000123815 | ADCK4     | 19 | 40691529  | 40718207  | protein_coding | 442,23 | 0 |
| ENSG00000157350 | ST3GAL2   | 16 | 70375978  | 70439237  | protein_coding | 440,19 | 0 |
| ENSG00000092098 | RNF31     | 14 | 24146683  | 24160661  | protein_coding | 438,30 | 0 |
| ENSG00000142961 | MOB3C     | 1  | 46607715  | 46616891  | protein_coding | 436,90 | 0 |
| ENSG00000128283 | CDC42EP1  | 22 | 37560447  | 37569405  | protein_coding | 436,70 | 0 |
| ENSG00000090565 | RAB11FIP3 | 16 | 425619    | 523011    | protein_coding | 434,89 | 0 |
| ENSG00000140983 | RHOT2     | 16 | 668086    | 674174    | protein_coding | 434,73 | 0 |
| ENSG00000108352 | RAPGEFL1  | 17 | 40177010  | 40195656  | protein_coding | 432,70 | 0 |
| ENSG00000134853 | PDGFRA    | 4  | 54229097  | 54298247  | protein_coding | 431,90 | 0 |
| ENSG00000162415 | ZSWIM5    | 1  | 45016399  | 45306209  | protein_coding | 431,75 | 0 |
| ENSG00000129473 | BCL2L2    | 14 | 23298790  | 23311759  | protein_coding | 431,52 | 0 |
| ENSG00000071859 | FAM50A    | X  | 154444126 | 154450654 | protein_coding | 429,26 | 0 |
| ENSG00000139645 | ANKRD52   | 12 | 56237807  | 56258391  | protein_coding | 428,78 | 0 |
| ENSG00000007541 | PIGQ      | 16 | 566995    | 584136    | protein_coding | 428,62 | 0 |
| ENSG00000134684 | YARS      | 1  | 32775237  | 32818153  | protein_coding | 428,15 | 0 |
| ENSG00000137842 | TMEM62    | 15 | 43123279  | 43185146  | protein_coding | 426,90 | 0 |
| ENSG00000240972 | MIF       | 22 | 23894004  | 23895227  | protein_coding | 426,66 | 0 |
| ENSG00000137094 | DNAJB5    | 9  | 34989641  | 34998900  | protein_coding | 426,03 | 0 |
| ENSG00000115602 | IL1RL1    | 2  | 102311502 | 102352037 | protein_coding | 425,40 | 0 |
| ENSG00000143126 | CELSR2    | 1  | 109250019 | 109275750 | protein_coding | 425,40 | 0 |
| ENSG00000196263 | ZNF471    | 19 | 56507843  | 56530221  | protein_coding | 425,30 | 0 |
| ENSG00000198142 | SOWAHC    | 2  | 109614334 | 109618990 | protein_coding | 424,59 | 0 |
| ENSG00000116157 | GPX7      | 1  | 52602372  | 52609051  | protein_coding | 424,00 | 0 |
| ENSG00000212747 | FAM127C   | X  | 135020504 | 135022529 | protein_coding | 423,80 | 0 |
| ENSG00000257704 | INAFM1    | 19 | 47274453  | 47275707  | protein_coding | 423,62 | 0 |
| ENSG00000129538 | RNASE1    | 14 | 20801228  | 20803278  | protein_coding | 423,50 | 0 |
| ENSG00000145335 | SNCA      | 4  | 89724099  | 89838315  | protein_coding | 423,40 | 0 |
| ENSG00000148399 | DPH7      | 9  | 137554904 | 137578935 | protein_coding | 421,70 | 0 |
| ENSG00000127472 | PLA2G5    | 1  | 20028179  | 20091190  | protein_coding | 419,50 | 0 |
| ENSG00000106404 | CLDN15    | 7  | 101232092 | 101238820 | protein_coding | 418,08 | 0 |
| ENSG00000160233 | LRRC3     | 21 | 44455486  | 44462196  | protein_coding | 416,00 | 0 |
| ENSG00000006282 | SPATA20   | 17 | 50543058  | 50555852  | protein_coding | 415,71 | 0 |
| ENSG00000136305 | CIDEB     | 14 | 24305096  | 24311430  | protein_coding | 415,69 | 0 |
| ENSG00000163131 | CTSS      | 1  | 150730196 | 150765957 | protein_coding | 415,64 | 0 |
| ENSG00000110315 | RNF141    | 11 | 10511678  | 10541230  | protein_coding | 415,11 | 0 |
| ENSG00000069535 | MAOB      | X  | 43766611  | 43882447  | protein_coding | 415,00 | 0 |
| ENSG00000134184 | GSTM1     | 1  | 109687814 | 109709039 | protein_coding | 414,90 | 0 |
| ENSG00000075213 | SEMA3A    | 7  | 83955777  | 84492724  | protein_coding | 414,23 | 0 |
| ENSG00000158792 | SPATA2L   | 16 | 89696343  | 89701705  | protein_coding | 413,80 | 0 |
| ENSG00000198963 | RORB      | 9  | 74497365  | 74693177  | protein_coding | 413,60 | 0 |
| ENSG00000095739 | BAMBI     | 10 | 28677342  | 28682939  | protein_coding | 412,57 | 0 |
| ENSG00000037757 | MRI1      | 19 | 13764532  | 13774282  | protein_coding | 412,10 | 0 |
| ENSG00000161996 | WDR90     | 16 | 649311    | 667833    | protein_coding | 412,10 | 0 |
| ENSG00000026950 | BTN3A1    | 6  | 26402237  | 26415216  | protein_coding | 411,20 | 0 |

|                 |          |    |           |           |                |        |   |
|-----------------|----------|----|-----------|-----------|----------------|--------|---|
| ENSG00000114738 | MAPKAPK3 | 3  | 50611520  | 50649297  | protein_coding | 410,69 | 0 |
| ENSG00000143387 | CTSK     | 1  | 150796208 | 150808323 | protein_coding | 410,57 | 0 |
| ENSG00000172137 | CALB2    | 16 | 71358713  | 71390438  | protein_coding | 407,98 | 0 |
| ENSG00000250479 | CHCHD10  | 22 | 23765834  | 23768443  | protein_coding | 407,90 | 0 |
| ENSG00000131016 | AKAP12   | 6  | 151239999 | 151358557 | protein_coding | 407,45 | 0 |
| ENSG00000176845 | METRNL   | 17 | 83079691  | 83095119  | protein_coding | 406,12 | 0 |
| ENSG00000058453 | CROCC    | 1  | 16740273  | 16972979  | protein_coding | 404,80 | 0 |
| ENSG00000185818 | NAT8L    | 4  | 2059512   | 2069089   | protein_coding | 404,70 | 0 |
| ENSG00000197629 | MPEG1    | 11 | 59208510  | 59212951  | protein_coding | 404,00 | 0 |
| ENSG00000101276 | SLC52A3  | 20 | 760080    | 776015    | protein_coding | 403,80 | 0 |
| ENSG00000182173 | TSEN54   | 17 | 75516060  | 75524739  | protein_coding | 403,50 | 0 |
| ENSG00000166592 | RRAD     | 16 | 66921679  | 66925644  | protein_coding | 403,20 | 0 |
| ENSG00000130038 | CRACR2A  | 12 | 3606633   | 3764819   | protein_coding | 401,51 | 0 |
| ENSG00000169271 | HSPB3    | 5  | 54455601  | 54456384  | protein_coding | 400,80 | 0 |
| ENSG00000169992 | NLGN2    | 17 | 7404874   | 7419860   | protein_coding | 399,29 | 0 |
| ENSG00000160326 | SLC2A6   | 9  | 133471095 | 133479137 | protein_coding | 398,60 | 0 |
| ENSG00000104805 | NUCB1    | 19 | 48900050  | 48923372  | protein_coding | 397,75 | 0 |
| ENSG00000164032 | H2AFZ    | 4  | 99948086  | 99950388  | protein_coding | 397,65 | 0 |
| ENSG00000070610 | GBA2     | 9  | 35736866  | 35749228  | protein_coding | 397,01 | 0 |
| ENSG00000155760 | FZD7     | 2  | 202034587 | 202038445 | protein_coding | 396,64 | 0 |
| ENSG00000155256 | ZFYVE27  | 10 | 97737121  | 97760907  | protein_coding | 394,30 | 0 |
| ENSG00000100612 | DHRS7    | 14 | 60144120  | 60169856  | protein_coding | 393,71 | 0 |
| ENSG00000185432 | METTL7A  | 12 | 50923472  | 50932517  | protein_coding | 392,40 | 0 |
| ENSG00000135446 | CDK4     | 12 | 57747727  | 57756013  | protein_coding | 391,39 | 0 |
| ENSG00000123609 | NMI      | 2  | 151270465 | 151290057 | protein_coding | 391,10 | 0 |
| ENSG00000139531 | SUOX     | 12 | 55997180  | 56006641  | protein_coding | 390,30 | 0 |
| ENSG00000165282 | PIGO     | 9  | 35088688  | 35096601  | protein_coding | 390,13 | 0 |
| ENSG00000100342 | APOL1    | 22 | 36253010  | 36267530  | protein_coding | 389,70 | 0 |
| ENSG00000107551 | RASSF4   | 10 | 44959407  | 44995891  | protein_coding | 389,60 | 0 |
| ENSG00000162981 | FAM84A   | 2  | 14632686  | 14650814  | protein_coding | 388,40 | 0 |
| ENSG00000141959 | PFKL     | 21 | 44300051  | 44327376  | protein_coding | 388,27 | 0 |
| ENSG00000172216 | CEBPB    | 20 | 50190734  | 50192689  | protein_coding | 388,06 | 0 |
| ENSG00000184194 | GPR173   | X  | 53049091  | 53080615  | protein_coding | 387,90 | 0 |
| ENSG00000084652 | TXLNA    | 1  | 32179686  | 32198285  | protein_coding | 387,66 | 0 |
| ENSG00000170439 | METTL7B  | 12 | 55681546  | 55684611  | protein_coding | 387,60 | 0 |
| ENSG00000196440 | ARMCX4   | X  | 101418287 | 101533459 | protein_coding | 387,57 | 0 |
| ENSG00000168899 | VAMP5    | 2  | 85584408  | 85593412  | protein_coding | 386,70 | 0 |
| ENSG00000152778 | IFIT5    | 10 | 89414586  | 89421001  | protein_coding | 385,83 | 0 |
| ENSG00000176108 | CHMP6    | 17 | 80991598  | 81009517  | protein_coding | 385,62 | 0 |
| ENSG00000170004 | CHD3     | 17 | 7884806   | 7912760   | protein_coding | 385,37 | 0 |
| ENSG00000161960 | EIF4A1   | 17 | 7572706   | 7579005   | protein_coding | 384,27 | 0 |
| ENSG00000198816 | ZNF358   | 19 | 7515292   | 7521026   | protein_coding | 384,06 | 0 |
| ENSG00000048140 | TSPAN17  | 5  | 176647387 | 176659054 | protein_coding | 383,84 | 0 |
| ENSG00000187134 | AKR1C1   | 10 | 4963253   | 5107522   | protein_coding | 382,80 | 0 |
| ENSG00000144115 | THNSL2   | 2  | 88170295  | 88186636  | protein_coding | 382,80 | 0 |
| ENSG00000101194 | SLC17A9  | 20 | 62952647  | 62969585  | protein_coding | 382,15 | 0 |
| ENSG00000074181 | NOTCH3   | 19 | 15159038  | 15200981  | protein_coding | 381,10 | 0 |
| ENSG00000176248 | ANAPC2   | 9  | 137174784 | 137188549 | protein_coding | 380,83 | 0 |
| ENSG00000137076 | TLN1     | 9  | 35696948  | 35732395  | protein_coding | 380,53 | 0 |
| ENSG00000198892 | SHISA4   | 1  | 201888680 | 201892306 | protein_coding | 380,30 | 0 |
| ENSG00000133134 | BEX2     | X  | 103309346 | 103311046 | protein_coding | 380,23 | 0 |
| ENSG00000185324 | CDK10    | 16 | 89680737  | 89696364  | protein_coding | 378,49 | 0 |
| ENSG00000104824 | HNRNPL   | 19 | 38836388  | 38852347  | protein_coding | 377,80 | 0 |
| ENSG00000141026 | MED9     | 17 | 17476986  | 17493226  | protein_coding | 376,40 | 0 |
| ENSG00000185909 | KLHDC8B  | 3  | 49171611  | 49176486  | protein_coding | 376,40 | 0 |
| ENSG00000182916 | TCEAL7   | X  | 103330196 | 103332326 | protein_coding | 375,50 | 0 |
| ENSG00000127129 | EDN2     | 1  | 41478775  | 41484673  | protein_coding | 375,20 | 0 |
| ENSG00000173349 | SFT2D3   | 2  | 127701508 | 127705242 | protein_coding | 374,25 | 0 |

|                 |           |    |           |           |                |        |   |
|-----------------|-----------|----|-----------|-----------|----------------|--------|---|
| ENSG0000030110  | BAK1      | 6  | 33572547  | 33580293  | protein_coding | 374,00 | 0 |
| ENSG0000064989  | CALCL     | 2  | 187343129 | 187448460 | protein_coding | 373,80 | 0 |
| ENSG0000068366  | ACSL4     | X  | 109624244 | 109733403 | protein_coding | 372,91 | 0 |
| ENSG00000119986 | AVPI1     | 10 | 97677424  | 97687323  | protein_coding | 372,86 | 0 |
| ENSG00000185189 | NRBP2     | 8  | 143833594 | 143840974 | protein_coding | 372,72 | 0 |
| ENSG0000019991  | HGF       | 7  | 81699006  | 81770438  | protein_coding | 372,69 | 0 |
| ENSG00000150347 | ARID5B    | 10 | 61901300  | 62096944  | protein_coding | 371,93 | 0 |
| ENSG0000069399  | BCL3      | 19 | 44747705  | 44760044  | protein_coding | 371,85 | 0 |
| ENSG0000090382  | LYZ       | 12 | 69348341  | 69354234  | protein_coding | 371,50 | 0 |
| ENSG00000150687 | PRSS23    | 11 | 86791059  | 86952910  | protein_coding | 370,14 | 0 |
| ENSG00000164068 | RNF123    | 3  | 49689499  | 49721529  | protein_coding | 369,76 | 0 |
| ENSG00000165272 | AQP3      | 9  | 33441154  | 33447611  | protein_coding | 369,75 | 0 |
| ENSG00000179542 | SLITRK4   | X  | 143622790 | 143635777 | protein_coding | 369,30 | 0 |
| ENSG00000127920 | GNG11     | 7  | 93921699  | 93928610  | protein_coding | 368,80 | 0 |
| ENSG00000050327 | ARHGEF5   | 7  | 144355288 | 144380632 | protein_coding | 368,50 | 0 |
| ENSG00000258839 | MC1R      | 16 | 89912119  | 89920977  | protein_coding | 368,40 | 0 |
| ENSG00000123143 | PKN1      | 19 | 14433053  | 14471867  | protein_coding | 368,39 | 0 |
| ENSG00000162729 | IGSF8     | 1  | 160091340 | 160098943 | protein_coding | 368,00 | 0 |
| ENSG00000130775 | THEMIS2   | 1  | 27872543  | 27886685  | protein_coding | 367,87 | 0 |
| ENSG0000074590  | NUAK1     | 12 | 106063340 | 106140033 | protein_coding | 367,60 | 0 |
| ENSG00000225828 | FAM229A   | 1  | 32361270  | 32364278  | protein_coding | 366,70 | 0 |
| ENSG00000135828 | RNASEL    | 1  | 182573634 | 182589256 | protein_coding | 365,20 | 0 |
| ENSG00000196961 | AP2A1     | 19 | 49766968  | 49807113  | protein_coding | 364,62 | 0 |
| ENSG00000136279 | DBNL      | 7  | 44044640  | 44069456  | protein_coding | 363,84 | 0 |
| ENSG00000131584 | ACAP3     | 1  | 1292376   | 1309609   | protein_coding | 362,73 | 0 |
| ENSG00000196923 | PDLIM7    | 5  | 177483394 | 177497606 | protein_coding | 362,68 | 0 |
| ENSG00000134769 | DTNA      | 18 | 34493290  | 34891844  | protein_coding | 360,00 | 0 |
| ENSG00000149532 | CPSF7     | 11 | 61402641  | 61430031  | protein_coding | 359,65 | 0 |
| ENSG00000126524 | SBDS      | 7  | 66987677  | 66995601  | protein_coding | 359,58 | 0 |
| ENSG00000103245 | NARFL     | 16 | 729753    | 741329    | protein_coding | 359,41 | 0 |
| ENSG0000012124  | CD22      | 19 | 35319261  | 35347355  | protein_coding | 358,60 | 0 |
| ENSG00000107968 | MAP3K8    | 10 | 30433937  | 30461833  | protein_coding | 358,60 | 0 |
| ENSG00000170231 | FABP6     | 5  | 160187367 | 160238735 | protein_coding | 358,60 | 0 |
| ENSG00000145214 | DGKQ      | 4  | 958887    | 986895    | protein_coding | 358,40 | 0 |
| ENSG00000182095 | TNRC18    | 7  | 5306790   | 5425414   | protein_coding | 357,94 | 0 |
| ENSG00000184678 | HIST2H2BE | 1  | 149842204 | 149886652 | protein_coding | 357,93 | 0 |
| ENSG00000170801 | HTRA3     | 4  | 8269765   | 8307111   | protein_coding | 357,72 | 0 |
| ENSG00000072310 | SREBF1    | 17 | 17810399  | 17837002  | protein_coding | 357,25 | 0 |
| ENSG00000090975 | PITPNM2   | 12 | 122983480 | 123150015 | protein_coding | 356,90 | 0 |
| ENSG00000125430 | HS3ST3B1  | 17 | 14301083  | 14349404  | protein_coding | 356,60 | 0 |
| ENSG0000026559  | KCNG1     | 20 | 51003656  | 51023129  | protein_coding | 355,70 | 0 |
| ENSG00000175482 | POLD4     | 11 | 67350777  | 67356972  | protein_coding | 355,50 | 0 |
| ENSG00000105722 | ERF       | 19 | 42247572  | 42255157  | protein_coding | 355,48 | 0 |
| ENSG00000160284 | SPATC1L   | 21 | 46161148  | 46184476  | protein_coding | 355,27 | 0 |
| ENSG00000169242 | EFNA1     | 1  | 155127460 | 155134857 | protein_coding | 354,30 | 0 |
| ENSG00000127928 | GNGT1     | 7  | 93591573  | 93911265  | protein_coding | 354,20 | 0 |
| ENSG00000167702 | KIFC2     | 8  | 144466043 | 144474202 | protein_coding | 354,11 | 0 |
| ENSG00000152527 | PLEKHH2   | 2  | 43637273  | 43767987  | protein_coding | 353,95 | 0 |
| ENSG00000213694 | S1PR3     | 9  | 88991447  | 89005010  | protein_coding | 353,70 | 0 |
| ENSG00000100359 | SGSM3     | 22 | 40370591  | 40410289  | protein_coding | 353,67 | 0 |
| ENSG00000179588 | ZFPM1     | 16 | 88453317  | 88537016  | protein_coding | 353,67 | 0 |
| ENSG00000084734 | GCKR      | 2  | 27496842  | 27523684  | protein_coding | 353,24 | 0 |
| ENSG00000087250 | MT3       | 16 | 56589074  | 56591088  | protein_coding | 352,43 | 0 |
| ENSG00000169957 | ZNF768    | 16 | 30524001  | 30526821  | protein_coding | 352,05 | 0 |
| ENSG00000104325 | DECR1     | 8  | 90001405  | 90052092  | protein_coding | 352,00 | 0 |
| ENSG00000122490 | PQLC1     | 18 | 79902420  | 79951664  | protein_coding | 351,49 | 0 |
| ENSG00000162654 | GBP4      | 1  | 89181148  | 89198932  | protein_coding | 351,30 | 0 |
| ENSG00000168487 | BMP1      | 8  | 22164736  | 22212326  | protein_coding | 351,08 | 0 |

|                 |           |    |           |           |                |        |   |
|-----------------|-----------|----|-----------|-----------|----------------|--------|---|
| ENSG00000169213 | RAB3B     | 1  | 51907956  | 51990764  | protein_coding | 349,53 | 0 |
| ENSG00000119535 | CSF3R     | 1  | 36466043  | 36483278  | protein_coding | 349,20 | 0 |
| ENSG00000091986 | CCDC80    | 3  | 112596794 | 112649530 | protein_coding | 348,08 | 0 |
| ENSG00000166741 | NNMT      | 11 | 114257787 | 114313285 | protein_coding | 346,40 | 0 |
| ENSG00000136048 | DRAM1     | 12 | 101877351 | 102012130 | protein_coding | 346,15 | 0 |
| ENSG00000049089 | COL9A2    | 1  | 40300487  | 40317816  | protein_coding | 346,10 | 0 |
| ENSG00000100994 | PYGB      | 20 | 25248069  | 25298014  | protein_coding | 344,38 | 0 |
| ENSG00000171813 | PWWP2B    | 10 | 132397168 | 132417863 | protein_coding | 343,25 | 0 |
| ENSG00000170379 | TCAF2     | 7  | 143620950 | 143730409 | protein_coding | 340,79 | 0 |
| ENSG00000112972 | HMGCS1    | 5  | 43289395  | 43313512  | protein_coding | 340,56 | 0 |
| ENSG00000072042 | RDH11     | 14 | 67676801  | 67695814  | protein_coding | 340,51 | 0 |
| ENSG00000061656 | SPAG4     | 20 | 35615892  | 35621049  | protein_coding | 339,30 | 0 |
| ENSG00000071575 | TRIB2     | 2  | 12716889  | 12742734  | protein_coding | 338,96 | 0 |
| ENSG00000197296 | FITM2     | 20 | 44302838  | 44311169  | protein_coding | 338,75 | 0 |
| ENSG00000137411 | VARS2     | 6  | 30908242  | 30926459  | protein_coding | 338,63 | 0 |
| ENSG00000155111 | CDK19     | 6  | 110609978 | 110815958 | protein_coding | 337,84 | 0 |
| ENSG00000130175 | PRKCSH    | 19 | 11435288  | 11450968  | protein_coding | 337,57 | 0 |
| ENSG00000198455 | ZXDB      | X  | 57591652  | 57597545  | protein_coding | 337,36 | 0 |
| ENSG00000159792 | PSKH1     | 16 | 67893272  | 67929678  | protein_coding | 337,05 | 0 |
| ENSG00000159496 | RGL4      | 22 | 23688136  | 23699176  | protein_coding | 337,00 | 0 |
| ENSG00000167549 | CORO6     | 17 | 29614756  | 29622907  | protein_coding | 337,00 | 0 |
| ENSG00000181234 | TMEM132C  | 12 | 128267403 | 128707915 | protein_coding | 336,95 | 0 |
| ENSG00000159335 | PTMS      | 12 | 6765516   | 6770952   | protein_coding | 336,91 | 0 |
| ENSG00000132530 | XAF1      | 17 | 6755447   | 6775647   | protein_coding | 335,60 | 0 |
| ENSG00000090097 | PCBP4     | 3  | 51957454  | 51974016  | protein_coding | 335,06 | 0 |
| ENSG00000126391 | FRMD8     | 11 | 65386599  | 65413525  | protein_coding | 334,91 | 0 |
| ENSG00000104833 | TUBB4A    | 19 | 6494319   | 6502848   | protein_coding | 334,00 | 0 |
| ENSG00000180902 | D2HGDH    | 2  | 241734579 | 241768816 | protein_coding | 333,95 | 0 |
| ENSG00000197019 | SERTAD1   | 19 | 40421592  | 40426025  | protein_coding | 333,85 | 0 |
| ENSG00000222009 | BTBD19    | 1  | 44808482  | 44815585  | protein_coding | 333,28 | 0 |
| ENSG00000197774 | EME2      | 16 | 1773207   | 1781708   | protein_coding | 333,10 | 0 |
| ENSG00000137726 | FXYD6     | 11 | 117836976 | 117877486 | protein_coding | 333,00 | 0 |
| ENSG00000134590 | FAM127A   | X  | 135032366 | 135033546 | protein_coding | 333,00 | 0 |
| ENSG00000183722 | LHFP      | 13 | 39342892  | 39603528  | protein_coding | 332,88 | 0 |
| ENSG00000125637 | PSD4      | 2  | 113157325 | 113209396 | protein_coding | 332,50 | 0 |
| ENSG00000139192 | TAPBPL    | 12 | 6451690   | 6466517   | protein_coding | 331,60 | 0 |
| ENSG00000185483 | ROR1      | 1  | 63774022  | 64181498  | protein_coding | 330,75 | 0 |
| ENSG00000144476 | ACKR3     | 2  | 236567787 | 236582358 | protein_coding | 330,60 | 0 |
| ENSG00000188211 | NCR3LG1   | 11 | 17351726  | 17377341  | protein_coding | 329,88 | 0 |
| ENSG00000197249 | SERPINA1  | 14 | 94376747  | 94390693  | protein_coding | 329,60 | 0 |
| ENSG00000204267 | TAP2      | 6  | 32821833  | 32838780  | protein_coding | 329,60 | 0 |
| ENSG00000129968 | ABHD17A   | 19 | 1876810   | 1885547   | protein_coding | 329,29 | 0 |
| ENSG00000221963 | APOL6     | 22 | 35648395  | 35668409  | protein_coding | 328,25 | 0 |
| ENSG00000102780 | DGKH      | 13 | 42040036  | 42256578  | protein_coding | 327,73 | 0 |
| ENSG00000173530 | TNFRSF10D | 8  | 23135588  | 23164030  | protein_coding | 327,00 | 0 |
| ENSG00000115275 | MOGS      | 2  | 74461057  | 74465410  | protein_coding | 326,98 | 0 |
| ENSG00000118508 | RAB32     | 6  | 146543693 | 146554965 | protein_coding | 326,60 | 0 |
| ENSG00000104524 | PYCR1     | 8  | 143603913 | 143609773 | protein_coding | 326,40 | 0 |
| ENSG00000182141 | ZNF708    | 19 | 21221500  | 21329425  | protein_coding | 325,90 | 0 |
| ENSG00000124875 | CXCL6     | 4  | 73836497  | 73849064  | protein_coding | 325,80 | 0 |
| ENSG00000116962 | NID1      | 1  | 235975830 | 236065162 | protein_coding | 325,74 | 0 |
| ENSG00000170049 | KCNAB3    | 17 | 7921859   | 7929803   | protein_coding | 325,20 | 0 |
| ENSG00000115255 | REEP6     | 19 | 1490747   | 1497927   | protein_coding | 324,84 | 0 |
| ENSG00000105737 | GRIK5     | 19 | 41998321  | 42069498  | protein_coding | 324,71 | 0 |
| ENSG00000189171 | S100A13   | 1  | 153618787 | 153631360 | protein_coding | 324,70 | 0 |
| ENSG00000089060 | SLC8B1    | 12 | 113298759 | 113359493 | protein_coding | 324,62 | 0 |
| ENSG00000178947 | SMIM10L2A | X  | 135421943 | 135428074 | protein_coding | 324,30 | 0 |
| ENSG00000178719 | GRINA     | 8  | 143990058 | 143993415 | protein_coding | 324,20 | 0 |



|                 |           |    |           |           |                |        |   |
|-----------------|-----------|----|-----------|-----------|----------------|--------|---|
| ENSG00000146278 | PNRC1     | 6  | 89080751  | 89085160  | protein_coding | 324,19 | 0 |
| ENSG00000126759 | CFP       | X  | 47624213  | 47630305  | protein_coding | 323,70 | 0 |
| ENSG00000128159 | TUBGCP6   | 22 | 50217689  | 50244992  | protein_coding | 323,34 | 0 |
| ENSG00000086504 | MRPL28    | 16 | 367384    | 370527    | protein_coding | 322,96 | 0 |
| ENSG00000215041 | NEURL4    | 17 | 7315628   | 7329393   | protein_coding | 322,13 | 0 |
| ENSG00000161618 | ALDH16A1  | 19 | 49453169  | 49471048  | protein_coding | 321,85 | 0 |
| ENSG00000165915 | SLC39A13  | 11 | 47407132  | 47416501  | protein_coding | 321,03 | 0 |
| ENSG00000099385 | BCL7C     | 16 | 30833626  | 30894960  | protein_coding | 321,00 | 0 |
| ENSG00000101493 | ZNF516    | 18 | 76358190  | 76495190  | protein_coding | 320,56 | 0 |
| ENSG00000100321 | SYNGR1    | 22 | 39349925  | 39385588  | protein_coding | 320,23 | 0 |
| ENSG00000197712 | FAM114A1  | 4  | 38867677  | 38945739  | protein_coding | 320,00 | 0 |
| ENSG00000130224 | LRCH2     | X  | 115110616 | 115234072 | protein_coding | 319,60 | 0 |
| ENSG00000088882 | CPXM1     | 20 | 2794069   | 2800637   | protein_coding | 319,40 | 0 |
| ENSG00000103485 | QPRT      | 16 | 29679008  | 29698699  | protein_coding | 319,40 | 0 |
| ENSG00000092621 | PHGDH     | 1  | 119659798 | 119744215 | protein_coding | 318,60 | 0 |
| ENSG00000187601 | MAGEH1    | X  | 55452105  | 55453566  | protein_coding | 317,90 | 0 |
| ENSG00000167291 | TBC1D16   | 17 | 79932343  | 80035848  | protein_coding | 317,69 | 0 |
| ENSG00000141258 | SGSM2     | 17 | 2337498   | 2381058   | protein_coding | 317,68 | 0 |
| ENSG00000196372 | ASB13     | 10 | 5638867   | 5666595   | protein_coding | 317,40 | 0 |
| ENSG00000169122 | FAM110B   | 8  | 57994509  | 58204279  | protein_coding | 316,90 | 0 |
| ENSG00000114166 | KAT2B     | 3  | 20040023  | 20154404  | protein_coding | 316,23 | 0 |
| ENSG00000102225 | CDK16     | X  | 47217860  | 47229997  | protein_coding | 316,03 | 0 |
| ENSG00000094631 | HDAC6     | X  | 48801377  | 48824982  | protein_coding | 315,83 | 0 |
| ENSG00000203772 | SPRN      | 10 | 133420666 | 133424572 | protein_coding | 315,30 | 0 |
| ENSG00000127415 | IDUA      | 4  | 986997    | 1004506   | protein_coding | 314,50 | 0 |
| ENSG00000134698 | AGO4      | 1  | 35808172  | 35857890  | protein_coding | 314,33 | 0 |
| ENSG00000149948 | HMGA2     | 12 | 65824131  | 65966295  | protein_coding | 313,40 | 0 |
| ENSG00000173531 | MST1      | 3  | 49683947  | 49689501  | protein_coding | 313,00 | 0 |
| ENSG00000254402 | LRRC24    | 8  | 144522377 | 144527032 | protein_coding | 312,64 | 0 |
| ENSG00000178538 | CA8       | 8  | 60187347  | 60281412  | protein_coding | 312,40 | 0 |
| ENSG00000185561 | TLCD2     | 17 | 1702790   | 1710438   | protein_coding | 312,17 | 0 |
| ENSG00000114698 | PLSCR4    | 3  | 146192339 | 146251179 | protein_coding | 311,58 | 0 |
| ENSG00000099899 | TRMT2A    | 22 | 20111866  | 20117392  | protein_coding | 311,27 | 0 |
| ENSG00000215252 | GOLGA8B   | 15 | 34525207  | 34588503  | protein_coding | 310,95 | 0 |
| ENSG00000173193 | PARP14    | 3  | 122680618 | 122730840 | protein_coding | 309,55 | 0 |
| ENSG00000169016 | E2F6      | 2  | 11444375  | 11466177  | protein_coding | 309,38 | 0 |
| ENSG00000186174 | BCL9L     | 11 | 118893875 | 118925608 | protein_coding | 309,31 | 0 |
| ENSG00000169026 | MFSD7     | 4  | 681829    | 689441    | protein_coding | 309,00 | 0 |
| ENSG00000137504 | CREBZF    | 11 | 85659708  | 85682908  | protein_coding | 308,53 | 0 |
| ENSG00000134884 | ARGLU1    | 13 | 106541673 | 106568164 | protein_coding | 308,21 | 0 |
| ENSG00000178773 | CPNE7     | 16 | 89575768  | 89597246  | protein_coding | 307,56 | 0 |
| ENSG00000214655 | ZSWIM8    | 10 | 73785582  | 73801797  | protein_coding | 307,53 | 0 |
| ENSG00000183578 | TNFAIP8L3 | 15 | 51056598  | 51105276  | protein_coding | 307,20 | 0 |
| ENSG00000206262 | FOXL2NB   | 3  | 138947234 | 138953451 | protein_coding | 307,00 | 0 |
| ENSG00000204394 | VARS      | 6  | 31777518  | 31795953  | protein_coding | 306,63 | 0 |
| ENSG00000196943 | NOP9      | 14 | 24299862  | 24309124  | protein_coding | 306,05 | 0 |
| ENSG00000114853 | ZBTB47    | 3  | 42653684  | 42665854  | protein_coding | 305,80 | 0 |
| ENSG00000101825 | MXRA5     | X  | 3308565   | 3346641   | protein_coding | 305,80 | 0 |
| ENSG00000047230 | CTPS2     | X  | 16588003  | 16712936  | protein_coding | 305,27 | 0 |
| ENSG00000127863 | TNFRSF19  | 13 | 23570370  | 23676104  | protein_coding | 305,20 | 0 |
| ENSG00000205978 | NYNRIN    | 14 | 24398786  | 24419288  | protein_coding | 304,40 | 0 |
| ENSG00000160932 | LY6E      | 8  | 143017982 | 143023832 | protein_coding | 304,30 | 0 |
| ENSG00000105327 | BBC3      | 19 | 47220822  | 47232766  | protein_coding | 303,90 | 0 |
| ENSG00000122420 | PTGFR     | 1  | 78303884  | 78539749  | protein_coding | 303,90 | 0 |
| ENSG00000178802 | MPI       | 15 | 74890005  | 74902219  | protein_coding | 303,64 | 0 |
| ENSG00000136378 | ADAMTS7   | 15 | 78759203  | 78811431  | protein_coding | 302,90 | 0 |
| ENSG00000236609 | ZNF853    | 7  | 6615617   | 6624290   | protein_coding | 302,90 | 0 |
| ENSG00000196208 | GREB1     | 2  | 11482341  | 11642788  | protein_coding | 302,74 | 0 |

|                 |          |    |           |           |                |        |   |
|-----------------|----------|----|-----------|-----------|----------------|--------|---|
| ENSG00000157617 | C2CD2    | 21 | 41885112  | 41953890  | protein_coding | 302,71 | 0 |
| ENSG00000124507 | PACIN1   | 6  | 34466061  | 34535231  | protein_coding | 302,50 | 0 |
| ENSG00000068137 | PLEKHH3  | 17 | 42667914  | 42676994  | protein_coding | 302,09 | 0 |
| ENSG00000121716 | PILRB    | 7  | 100352176 | 100367733 | protein_coding | 301,90 | 0 |
| ENSG00000145247 | OCIAD2   | 4  | 48885019  | 48906937  | protein_coding | 301,75 | 0 |
| ENSG00000054690 | PLEKHH1  | 14 | 67533301  | 67589612  | protein_coding | 301,73 | 0 |
| ENSG00000174749 | C4orf32  | 4  | 112145397 | 112195256 | protein_coding | 301,60 | 0 |
| ENSG00000146386 | ABRACL   | 6  | 139028682 | 139043302 | protein_coding | 301,35 | 0 |
| ENSG00000161904 | LEMD2    | 6  | 33771202  | 33789136  | protein_coding | 301,24 | 0 |
| ENSG00000127586 | CHTF18   | 16 | 788046    | 800737    | protein_coding | 301,20 | 0 |
| ENSG00000138316 | ADAMTS14 | 10 | 70672803  | 70762441  | protein_coding | 300,91 | 0 |
| ENSG00000006534 | ALDH3B1  | 11 | 68008578  | 68029282  | protein_coding | 300,60 | 0 |
| ENSG00000120738 | EGR1     | 5  | 138465490 | 138469315 | protein_coding | 300,54 | 0 |
| ENSG00000116985 | BMP8B    | 1  | 39757182  | 39788861  | protein_coding | 299,69 | 0 |
| ENSG00000144935 | TRPC1    | 3  | 142724074 | 142807888 | protein_coding | 299,42 | 0 |
| ENSG00000112242 | E2F3     | 6  | 20401906  | 20493715  | protein_coding | 299,00 | 0 |
| ENSG00000198960 | ARMCX6   | X  | 101615118 | 101618001 | protein_coding | 298,40 | 0 |
| ENSG00000123329 | ARHGAP9  | 12 | 57472255  | 57488814  | protein_coding | 298,38 | 0 |
| ENSG00000142046 | TMEM91   | 19 | 41350911  | 41384083  | protein_coding | 298,35 | 0 |
| ENSG00000163040 | CCDC74A  | 2  | 131527675 | 131533666 | protein_coding | 298,00 | 0 |
| ENSG00000130707 | ASS1     | 9  | 130444929 | 130501274 | protein_coding | 297,40 | 0 |
| ENSG00000173511 | VEGFB    | 11 | 64234538  | 64238793  | protein_coding | 297,14 | 0 |
| ENSG00000185950 | IRS2     | 13 | 109752698 | 109786568 | protein_coding | 296,87 | 0 |
| ENSG00000198464 | ZNF480   | 19 | 52297177  | 52325922  | protein_coding | 296,70 | 0 |
| ENSG00000166189 | HPS6     | 10 | 102065390 | 102068038 | protein_coding | 295,50 | 0 |
| ENSG00000172828 | CES3     | 16 | 66961237  | 66975148  | protein_coding | 295,20 | 0 |
| ENSG00000148218 | ALAD     | 9  | 113386317 | 113401333 | protein_coding | 295,01 | 0 |
| ENSG00000157193 | LRP8     | 1  | 53242364  | 53328070  | protein_coding | 294,83 | 0 |
| ENSG00000223865 | HLA-DPB1 | 6  | 33075926  | 33087201  | protein_coding | 294,70 | 0 |
| ENSG00000185813 | PCYT2    | 17 | 81900965  | 81911464  | protein_coding | 294,42 | 0 |
| ENSG00000049283 | EPN3     | 17 | 50532543  | 50543750  | protein_coding | 294,27 | 0 |
| ENSG00000130204 | TOMM40   | 19 | 44890569  | 44903689  | protein_coding | 294,14 | 0 |
| ENSG00000213859 | KCTD11   | 17 | 7351889   | 7354944   | protein_coding | 293,65 | 0 |
| ENSG00000183963 | SMTN     | 22 | 31064105  | 31104757  | protein_coding | 293,60 | 0 |
| ENSG00000170604 | IRF2BP1  | 19 | 45883607  | 45886170  | protein_coding | 292,93 | 0 |
| ENSG00000139372 | TDG      | 12 | 103965804 | 103988874 | protein_coding | 292,63 | 0 |
| ENSG00000178301 | AQP11    | 11 | 77589391  | 77610355  | protein_coding | 292,54 | 0 |
| ENSG00000171476 | HOPX     | 4  | 56647988  | 56681899  | protein_coding | 292,20 | 0 |
| ENSG00000146587 | RBAK     | 7  | 5045821   | 5069488   | protein_coding | 292,15 | 0 |
| ENSG00000138650 | PCDH10   | 4  | 133149315 | 133208606 | protein_coding | 292,10 | 0 |
| ENSG00000108379 | WNT3     | 17 | 46762506  | 46833154  | protein_coding | 291,88 | 0 |
| ENSG00000196739 | COL27A1  | 9  | 114155560 | 114312511 | protein_coding | 291,09 | 0 |
| ENSG00000186416 | NKRF     | X  | 119588337 | 119605895 | protein_coding | 290,90 | 0 |
| ENSG00000105612 | DNASE2   | 19 | 12875211  | 12881468  | protein_coding | 290,73 | 0 |
| ENSG00000172936 | MYD88    | 3  | 38138478  | 38143022  | protein_coding | 289,48 | 0 |
| ENSG00000143319 | ISG20L2  | 1  | 156721891 | 156728799 | protein_coding | 288,19 | 0 |
| ENSG00000142192 | APP      | 21 | 25880550  | 26171128  | protein_coding | 287,38 | 0 |
| ENSG00000104332 | SFRP1    | 8  | 41261958  | 41309497  | protein_coding | 286,67 | 0 |
| ENSG00000185507 | IRF7     | 11 | 612553    | 615999    | protein_coding | 286,40 | 0 |
| ENSG00000167394 | ZNF668   | 16 | 31060843  | 31074320  | protein_coding | 285,50 | 0 |
| ENSG00000118526 | TCF21    | 6  | 133889138 | 133895553 | protein_coding | 285,30 | 0 |
| ENSG00000142102 | ATHL1    | 11 | 289135    | 296107    | protein_coding | 283,90 | 0 |
| ENSG00000185022 | MAFF     | 22 | 38200767  | 38216511  | protein_coding | 283,78 | 0 |
| ENSG00000149499 | EML3     | 11 | 62602218  | 62612765  | protein_coding | 282,82 | 0 |
| ENSG00000104361 | NIPAL2   | 8  | 98189833  | 98294393  | protein_coding | 282,60 | 0 |
| ENSG00000176842 | IRX5     | 16 | 54930862  | 54934485  | protein_coding | 281,80 | 0 |
| ENSG00000178662 | CSRNP3   | 2  | 165469647 | 165689407 | protein_coding | 281,17 | 0 |
| ENSG00000130522 | JUND     | 19 | 18279760  | 18281622  | protein_coding | 280,79 | 0 |

|                 |          |    |           |           |                |        |   |
|-----------------|----------|----|-----------|-----------|----------------|--------|---|
| ENSG00000138496 | PARP9    | 3  | 122527924 | 122564577 | protein_coding | 280,69 | 0 |
| ENSG00000088881 | EBF4     | 20 | 2692878   | 2760108   | protein_coding | 280,46 | 0 |
| ENSG00000243449 | C4orf48  | 4  | 2041993   | 2043970   | protein_coding | 279,27 | 0 |
| ENSG00000113494 | PRLR     | 5  | 35048756  | 35230589  | protein_coding | 279,07 | 0 |
| ENSG00000125733 | TRIP10   | 19 | 6737925   | 6751526   | protein_coding | 278,86 | 0 |
| ENSG00000188760 | TMEM198  | 2  | 219543663 | 219550595 | protein_coding | 278,80 | 0 |
| ENSG00000128000 | ZNF780B  | 19 | 40028260  | 40056209  | protein_coding | 278,50 | 0 |
| ENSG00000140678 | ITGAX    | 16 | 31355134  | 31382997  | protein_coding | 277,64 | 0 |
| ENSG00000183779 | ZNF703   | 8  | 37695751  | 37700021  | protein_coding | 277,60 | 0 |
| ENSG00000123989 | CHPF     | 2  | 219538947 | 219543787 | protein_coding | 276,54 | 0 |
| ENSG00000184584 | TMEM173  | 5  | 139475534 | 139482935 | protein_coding | 276,30 | 0 |
| ENSG00000112655 | PTK7     | 6  | 43076268  | 43161719  | protein_coding | 275,56 | 0 |
| ENSG00000109790 | KLHL5    | 4  | 39045039  | 39126857  | protein_coding | 275,53 | 0 |
| ENSG00000204103 | MAFB     | 20 | 40685848  | 40689240  | protein_coding | 275,18 | 0 |
| ENSG00000204305 | AGER     | 6  | 32180968  | 32184324  | protein_coding | 275,00 | 0 |
| ENSG00000103876 | FAH      | 15 | 80152490  | 80186946  | protein_coding | 274,18 | 0 |
| ENSG00000110074 | FOXRED1  | 11 | 126269055 | 126278131 | protein_coding | 273,67 | 0 |
| ENSG00000085265 | FCN1     | 9  | 134905890 | 134917963 | protein_coding | 273,20 | 0 |
| ENSG00000186350 | RXRA     | 9  | 134317098 | 134440585 | protein_coding | 273,15 | 0 |
| ENSG00000142632 | ARHGEF19 | 1  | 16197854  | 16212609  | protein_coding | 273,00 | 0 |
| ENSG00000162542 | TMCO4    | 1  | 19682213  | 19799945  | protein_coding | 272,90 | 0 |
| ENSG00000174705 | SH3PXD2B | 5  | 172325181 | 172454523 | protein_coding | 272,87 | 0 |
| ENSG00000106009 | BRAT1    | 7  | 2537877   | 2555727   | protein_coding | 272,66 | 0 |
| ENSG00000165458 | INPPL1   | 11 | 72223701  | 72239105  | protein_coding | 272,55 | 0 |
| ENSG00000161642 | ZNF385A  | 12 | 54369133  | 54391298  | protein_coding | 272,40 | 0 |
| ENSG00000065183 | WDR3     | 1  | 117929720 | 117966542 | protein_coding | 272,16 | 0 |
| ENSG00000135439 | AGAP2    | 12 | 57723761  | 57742157  | protein_coding | 272,00 | 0 |
| ENSG00000089057 | SLC23A2  | 20 | 4852356   | 5010293   | protein_coding | 271,43 | 0 |
| ENSG00000181191 | PJA1     | X  | 69160851  | 69165793  | protein_coding | 271,11 | 0 |
| ENSG00000161547 | SRSF2    | 17 | 76734115  | 76737374  | protein_coding | 270,99 | 0 |
| ENSG00000171659 | GPR34    | X  | 41688973  | 41697277  | protein_coding | 270,90 | 0 |
| ENSG00000109472 | CPE      | 4  | 165361194 | 165498320 | protein_coding | 269,54 | 0 |
| ENSG00000176928 | GCNT4    | 5  | 75025346  | 75030899  | protein_coding | 269,50 | 0 |
| ENSG00000173545 | ZNF622   | 5  | 16451519  | 16465792  | protein_coding | 268,27 | 0 |
| ENSG00000158773 | USF1     | 1  | 161039251 | 161045977 | protein_coding | 267,51 | 0 |
| ENSG00000137944 | CCBL2    | 1  | 88935773  | 88992953  | protein_coding | 266,44 | 0 |
| ENSG00000101255 | TRIB3    | 20 | 362835    | 397559    | protein_coding | 265,90 | 0 |
| ENSG00000164308 | ERAP2    | 5  | 96875939  | 96919716  | protein_coding | 265,80 | 0 |
| ENSG00000102871 | TRADD    | 16 | 67154180  | 67160298  | protein_coding | 265,18 | 0 |
| ENSG00000124508 | BTN2A2   | 6  | 26383096  | 26394874  | protein_coding | 265,10 | 0 |
| ENSG00000148803 | FUOM     | 10 | 133355154 | 133358035 | protein_coding | 264,50 | 0 |
| ENSG00000239264 | TXNDC5   | 6  | 7881517   | 7910814   | protein_coding | 264,30 | 0 |
| ENSG00000149115 | TNKS1BP1 | 11 | 57299638  | 57324952  | protein_coding | 264,00 | 0 |
| ENSG00000100726 | TELO2    | 16 | 1493344   | 1510457   | protein_coding | 263,23 | 0 |
| ENSG00000166483 | WEE1     | 11 | 9573681   | 9593457   | protein_coding | 263,00 | 0 |
| ENSG00000170458 | CD14     | 5  | 140631728 | 140633701 | protein_coding | 262,80 | 0 |
| ENSG00000136111 | TBC1D4   | 13 | 75284665  | 75482114  | protein_coding | 262,70 | 0 |
| ENSG00000143248 | RGS5     | 1  | 163111121 | 163321791 | protein_coding | 262,40 | 0 |
| ENSG00000131019 | ULBP3    | 6  | 150063150 | 150069095 | protein_coding | 262,10 | 0 |
| ENSG00000197226 | TBC1D9B  | 5  | 179862066 | 179907859 | protein_coding | 261,64 | 0 |
| ENSG00000204642 | HLA-F    | 6  | 29722775  | 29738528  | protein_coding | 261,40 | 0 |
| ENSG00000174684 | B4GAT1   | 11 | 66345372  | 66347692  | protein_coding | 261,36 | 0 |
| ENSG00000008517 | IL32     | 16 | 3065297   | 3082192   | protein_coding | 260,90 | 0 |
| ENSG00000134575 | ACP2     | 11 | 47239302  | 47248906  | protein_coding | 259,85 | 0 |
| ENSG00000017483 | SLC38A5  | X  | 48458537  | 48470256  | protein_coding | 259,00 | 0 |
| ENSG00000158106 | RHPN1    | 8  | 143368855 | 143384220 | protein_coding | 258,55 | 0 |
| ENSG00000240184 | PCDHGC3  | 5  | 141475947 | 141512979 | protein_coding | 258,50 | 0 |
| ENSG00000117226 | GBP3     | 1  | 89006666  | 89022894  | protein_coding | 258,50 | 0 |

|                 |          |    |           |           |                |        |   |
|-----------------|----------|----|-----------|-----------|----------------|--------|---|
| ENSG0000079435  | LIPE     | 19 | 42401507  | 42427426  | protein_coding | 258,41 | 0 |
| ENSG0000063587  | ZNF275   | X  | 153334155 | 153360110 | protein_coding | 258,32 | 0 |
| ENSG00000135763 | URB2     | 1  | 229626234 | 229660199 | protein_coding | 258,30 | 0 |
| ENSG00000213199 | ASIC3    | 7  | 151048292 | 151052756 | protein_coding | 257,57 | 0 |
| ENSG00000143774 | GUK1     | 1  | 228139962 | 228148984 | protein_coding | 257,53 | 0 |
| ENSG00000100889 | PCK2     | 14 | 24094053  | 24110598  | protein_coding | 257,40 | 0 |
| ENSG00000115267 | IFIH1    | 2  | 162267079 | 162318703 | protein_coding | 257,30 | 0 |
| ENSG00000167772 | ANGPTL4  | 19 | 8363289   | 8374373   | protein_coding | 257,21 | 0 |
| ENSG00000205336 | ADGRG1   | 16 | 57610652  | 57665580  | protein_coding | 255,15 | 0 |
| ENSG00000163702 | IL17RC   | 3  | 9917074   | 9933630   | protein_coding | 254,65 | 0 |
| ENSG00000089639 | GMIP     | 19 | 19629476  | 19643667  | protein_coding | 254,60 | 0 |
| ENSG00000115935 | WIPF1    | 2  | 174559572 | 174682916 | protein_coding | 253,36 | 0 |
| ENSG00000115828 | QPCT     | 2  | 37344574  | 37373322  | protein_coding | 253,30 | 0 |
| ENSG00000041880 | PARP3    | 3  | 51942345  | 51948867  | protein_coding | 252,40 | 0 |
| ENSG00000110344 | UBE4A    | 11 | 118359585 | 118399211 | protein_coding | 252,28 | 0 |
| ENSG00000113721 | PDGFRB   | 5  | 150113837 | 150155872 | protein_coding | 252,00 | 0 |
| ENSG00000126243 | LRFN3    | 19 | 35935358  | 35945767  | protein_coding | 251,62 | 0 |
| ENSG00000147027 | TMEM47   | X  | 34627064  | 34657288  | protein_coding | 251,60 | 0 |
| ENSG00000102390 | PBDC1    | X  | 76172936  | 76178204  | protein_coding | 250,67 | 0 |
| ENSG00000125534 | PPDPF    | 20 | 63520724  | 63522206  | protein_coding | 250,47 | 0 |
| ENSG00000167996 | FTH1     | 11 | 61959718  | 61967660  | protein_coding | 250,07 | 0 |
| ENSG00000176903 | PNMA1    | 14 | 73711783  | 73714372  | protein_coding | 249,54 | 0 |
| ENSG00000169047 | IRS1     | 2  | 226731317 | 226799759 | protein_coding | 249,42 | 0 |
| ENSG00000226742 | HSBP1L1  | 18 | 79964561  | 79970822  | protein_coding | 249,20 | 0 |
| ENSG00000127951 | FGL2     | 7  | 77193371  | 77199826  | protein_coding | 249,10 | 0 |
| ENSG00000165996 | HACD1    | 10 | 17589032  | 17617377  | protein_coding | 249,09 | 0 |
| ENSG00000143851 | PTPN7    | 1  | 202147013 | 202161588 | protein_coding | 249,00 | 0 |
| ENSG00000175634 | RPS6KB2  | 11 | 67428460  | 67435408  | protein_coding | 248,98 | 0 |
| ENSG00000198931 | APRT     | 16 | 88809339  | 88811944  | protein_coding | 248,74 | 0 |
| ENSG00000185122 | HSF1     | 8  | 144291591 | 144314722 | protein_coding | 248,69 | 0 |
| ENSG00000147124 | ZNF41    | X  | 47445879  | 47482946  | protein_coding | 248,65 | 0 |
| ENSG00000075426 | FOSL2    | 2  | 28392448  | 28417312  | protein_coding | 248,56 | 0 |
| ENSG00000173638 | SLC19A1  | 21 | 45493572  | 45544411  | protein_coding | 248,29 | 0 |
| ENSG00000167778 | SPRYD3   | 12 | 53064316  | 53079420  | protein_coding | 248,24 | 0 |
| ENSG00000143891 | GALM     | 2  | 38665910  | 38741237  | protein_coding | 248,12 | 0 |
| ENSG00000137070 | IL11RA   | 9  | 34650702  | 34661892  | protein_coding | 248,10 | 0 |
| ENSG00000149925 | ALDOA    | 16 | 30053090  | 30070457  | protein_coding | 247,30 | 0 |
| ENSG00000092096 | SLC22A17 | 14 | 23346306  | 23352912  | protein_coding | 246,80 | 0 |
| ENSG00000116455 | WDR77    | 1  | 111439890 | 111449376 | protein_coding | 246,77 | 0 |
| ENSG00000112562 | SMOC2    | 6  | 168441151 | 168673445 | protein_coding | 246,71 | 0 |
| ENSG00000178921 | PFAS     | 17 | 8247618   | 8270491   | protein_coding | 245,23 | 0 |
| ENSG00000186297 | GABRA5   | 15 | 26866363  | 26949207  | protein_coding | 245,20 | 0 |
| ENSG00000156103 | MMP16    | 8  | 88032009  | 88328025  | protein_coding | 244,77 | 0 |
| ENSG00000247596 | TWF2     | 3  | 52228610  | 52239260  | protein_coding | 244,74 | 0 |
| ENSG00000005700 | IBTK     | 6  | 82169983  | 82247754  | protein_coding | 244,64 | 0 |
| ENSG00000160307 | S100B    | 21 | 46598962  | 46605208  | protein_coding | 244,50 | 0 |
| ENSG00000091490 | SEL1L3   | 4  | 25747427  | 25863760  | protein_coding | 244,00 | 0 |
| ENSG00000243978 | RGAG1    | X  | 110358816 | 110456334 | protein_coding | 243,95 | 0 |
| ENSG00000150893 | FREM2    | 13 | 38687129  | 38887131  | protein_coding | 243,73 | 0 |
| ENSG00000105711 | SCN1B    | 19 | 35030684  | 35040448  | protein_coding | 243,70 | 0 |
| ENSG00000160469 | BRSK1    | 19 | 55282072  | 55312533  | protein_coding | 243,18 | 0 |
| ENSG00000116260 | QSOX1    | 1  | 180154834 | 180204030 | protein_coding | 243,05 | 0 |
| ENSG00000213398 | LCAT     | 16 | 67939750  | 67944131  | protein_coding | 242,60 | 0 |
| ENSG00000240771 | ARHGEF25 | 12 | 57610180  | 57619379  | protein_coding | 242,20 | 0 |
| ENSG00000177409 | SAMD9L   | 7  | 93130055  | 93148369  | protein_coding | 242,20 | 0 |
| ENSG00000161509 | GRIN2C   | 17 | 74842023  | 74861504  | protein_coding | 242,00 | 0 |
| ENSG00000132965 | ALOX5AP  | 13 | 30713478  | 30764426  | protein_coding | 241,70 | 0 |
| ENSG00000163563 | MNDA     | 1  | 158831317 | 158849506 | protein_coding | 241,60 | 0 |

|                 |          |    |           |           |                |        |   |
|-----------------|----------|----|-----------|-----------|----------------|--------|---|
| ENSG00000130749 | ZC3H4    | 19 | 47064187  | 47113752  | protein_coding | 241,30 | 0 |
| ENSG00000106636 | YKT6     | 7  | 44200968  | 44214294  | protein_coding | 241,25 | 0 |
| ENSG00000004399 | PLXND1   | 3  | 129555175 | 129606818 | protein_coding | 240,85 | 0 |
| ENSG00000163686 | ABHD6    | 3  | 58237506  | 58295693  | protein_coding | 240,10 | 0 |
| ENSG00000213445 | SIPA1    | 11 | 65585395  | 65650930  | protein_coding | 240,00 | 0 |
| ENSG00000159714 | ZDHHC1   | 16 | 67394419  | 67416833  | protein_coding | 239,80 | 0 |
| ENSG00000213246 | SUPT4H1  | 17 | 58345175  | 58353093  | protein_coding | 238,83 | 0 |
| ENSG00000112874 | NUDT12   | 5  | 103548855 | 103562793 | protein_coding | 238,46 | 0 |
| ENSG00000001630 | CYP51A1  | 7  | 92112151  | 92142952  | protein_coding | 237,79 | 0 |
| ENSG00000049130 | KITLG    | 12 | 88492793  | 88580851  | protein_coding | 237,00 | 0 |
| ENSG00000099821 | POLRMT   | 19 | 617224    | 633604    | protein_coding | 236,43 | 0 |
| ENSG00000135750 | KCNK1    | 1  | 233614004 | 233672512 | protein_coding | 236,00 | 0 |
| ENSG00000134318 | ROCK2    | 2  | 11179761  | 11348330  | protein_coding | 235,99 | 0 |
| ENSG00000134815 | DHX34    | 19 | 47349281  | 47382704  | protein_coding | 235,96 | 0 |
| ENSG00000068724 | TTC7A    | 2  | 46916157  | 47076137  | protein_coding | 235,90 | 0 |
| ENSG00000271601 | LIX1L    | 1  | 145933423 | 145958001 | protein_coding | 235,62 | 0 |
| ENSG00000104059 | FAM189A1 | 15 | 29120254  | 29570723  | protein_coding | 235,22 | 0 |
| ENSG00000174307 | PHLDA3   | 1  | 201464383 | 201469237 | protein_coding | 234,73 | 0 |
| ENSG00000109654 | TRIM2    | 4  | 153152342 | 153339320 | protein_coding | 234,46 | 0 |
| ENSG00000105643 | ARRDC2   | 19 | 18001132  | 18014102  | protein_coding | 234,29 | 0 |
| ENSG00000183597 | TANGO2   | 22 | 20017014  | 20065926  | protein_coding | 234,25 | 0 |
| ENSG00000102699 | PARP4    | 13 | 24420926  | 24512810  | protein_coding | 233,93 | 0 |
| ENSG00000197162 | ZNF785   | 16 | 30573740  | 30585771  | protein_coding | 233,92 | 0 |
| ENSG00000152518 | ZFP36L2  | 2  | 43222402  | 43226609  | protein_coding | 233,66 | 0 |
| ENSG00000139874 | SSTR1    | 14 | 38207999  | 38213067  | protein_coding | 233,60 | 0 |
| ENSG00000116815 | CD58     | 1  | 116514535 | 116571039 | protein_coding | 233,60 | 0 |
| ENSG00000204498 | NFKBIL1  | 6  | 31546870  | 31558829  | protein_coding | 233,20 | 0 |
| ENSG00000185339 | TCN2     | 22 | 30606838  | 30627278  | protein_coding | 233,00 | 0 |
| ENSG00000110446 | SLC15A3  | 11 | 60937083  | 60952530  | protein_coding | 232,60 | 0 |
| ENSG00000130881 | LRP3     | 19 | 33177603  | 33208867  | protein_coding | 232,50 | 0 |
| ENSG00000164823 | OSGIN2   | 8  | 89901859  | 89927888  | protein_coding | 232,37 | 0 |
| ENSG00000169750 | RAC3     | 17 | 82031624  | 82034204  | protein_coding | 232,30 | 0 |
| ENSG00000177875 | CCDC184  | 12 | 48183584  | 48185926  | protein_coding | 232,23 | 0 |
| ENSG00000166147 | FBN1     | 15 | 48408306  | 48645849  | protein_coding | 231,75 | 0 |
| ENSG00000165688 | PMPCA    | 9  | 136410570 | 136423761 | protein_coding | 231,51 | 0 |
| ENSG00000048342 | CC2D2A   | 4  | 15469865  | 15601557  | protein_coding | 231,50 | 0 |
| ENSG00000198925 | ATG9A    | 2  | 219209772 | 219229717 | protein_coding | 231,45 | 0 |
| ENSG00000162139 | NEU3     | 11 | 74988134  | 75018893  | protein_coding | 230,60 | 0 |
| ENSG00000127220 | ABHD8    | 19 | 17292131  | 17310236  | protein_coding | 230,50 | 0 |
| ENSG00000122386 | ZNF205   | 16 | 3112560   | 3120517   | protein_coding | 230,50 | 0 |
| ENSG00000197580 | BCO2     | 11 | 112175467 | 112224699 | protein_coding | 229,90 | 0 |
| ENSG00000002933 | TMEM176A | 7  | 150800403 | 150805120 | protein_coding | 229,90 | 0 |
| ENSG0000013583  | HEBP1    | 12 | 12974864  | 13000273  | protein_coding | 229,64 | 0 |
| ENSG00000148334 | PTGES2   | 9  | 128120693 | 128128462 | protein_coding | 229,37 | 0 |
| ENSG00000124749 | COL21A1  | 6  | 56056590  | 56394094  | protein_coding | 229,30 | 0 |
| ENSG00000187961 | KLHL17   | 1  | 960587    | 965715    | protein_coding | 229,29 | 0 |
| ENSG00000213096 | ZNF254   | 19 | 24033405  | 24129961  | protein_coding | 229,00 | 0 |
| ENSG00000145349 | CAMK2D   | 4  | 113451032 | 113761927 | protein_coding | 228,43 | 0 |
| ENSG00000173156 | RHOD     | 11 | 67056818  | 67072013  | protein_coding | 228,30 | 0 |
| ENSG00000182473 | EXOC7    | 17 | 76081017  | 76121576  | protein_coding | 227,49 | 0 |
| ENSG00000177096 | FAM109B  | 22 | 42074251  | 42079441  | protein_coding | 227,40 | 0 |
| ENSG00000162526 | TSSK3    | 1  | 32351521  | 32364312  | protein_coding | 227,10 | 0 |
| ENSG00000213719 | CLIC1    | 6  | 31730581  | 31739763  | protein_coding | 226,91 | 0 |
| ENSG00000229809 | ZNF688   | 16 | 30569346  | 30572734  | protein_coding | 226,60 | 0 |
| ENSG00000012211 | PRICKLE3 | X  | 49175264  | 49186528  | protein_coding | 226,30 | 0 |
| ENSG00000198682 | PAPSS2   | 10 | 87659613  | 87747705  | protein_coding | 225,81 | 0 |
| ENSG00000163071 | SPATA18  | 4  | 52051331  | 52097292  | protein_coding | 225,73 | 0 |
| ENSG00000184261 | KCNK12   | 2  | 47516581  | 47570939  | protein_coding | 225,62 | 0 |

|                 |           |    |           |           |                |        |   |
|-----------------|-----------|----|-----------|-----------|----------------|--------|---|
| ENSG00000185215 | TNFAIP2   | 14 | 103123442 | 103137439 | protein_coding | 225,30 | 0 |
| ENSG00000239305 | RNF103    | 2  | 86603393  | 86623866  | protein_coding | 224,47 | 0 |
| ENSG00000197136 | PCNXL3    | 11 | 65615773  | 65637439  | protein_coding | 224,29 | 0 |
| ENSG00000160803 | UBQLN4    | 1  | 156035301 | 156053794 | protein_coding | 224,23 | 0 |
| ENSG00000206561 | COLQ      | 3  | 15450133  | 15521751  | protein_coding | 224,20 | 0 |
| ENSG00000170581 | STAT2     | 12 | 56341597  | 56360155  | protein_coding | 224,13 | 0 |
| ENSG00000180573 | HIST1H2AC | 6  | 26124145  | 26139116  | protein_coding | 224,10 | 0 |
| ENSG00000088888 | MAVS      | 20 | 3846799   | 3876123   | protein_coding | 223,97 | 0 |
| ENSG00000168010 | ATG16L2   | 11 | 72814308  | 72843674  | protein_coding | 223,65 | 0 |
| ENSG00000013588 | GPRC5A    | 12 | 12890782  | 12917937  | protein_coding | 223,65 | 0 |
| ENSG00000196422 | PPP1R26   | 9  | 135479079 | 135488893 | protein_coding | 223,30 | 0 |
| ENSG00000250067 | YJEFN3    | 19 | 19528861  | 19537581  | protein_coding | 223,20 | 0 |
| ENSG00000123338 | NCKAP1L   | 12 | 54497711  | 54548238  | protein_coding | 223,20 | 0 |
| ENSG00000102882 | MAPK3     | 16 | 30114105  | 30123506  | protein_coding | 223,18 | 0 |
| ENSG00000168961 | LGALS9    | 17 | 27629798  | 27649560  | protein_coding | 222,70 | 0 |
| ENSG00000139793 | MBNL2     | 13 | 97221434  | 97394120  | protein_coding | 222,20 | 0 |
| ENSG00000121691 | CAT       | 11 | 34438925  | 34472062  | protein_coding | 222,19 | 0 |
| ENSG00000142279 | WTIP      | 19 | 34481638  | 34512304  | protein_coding | 222,13 | 0 |
| ENSG00000183798 | EMILIN3   | 20 | 41359966  | 41366827  | protein_coding | 222,10 | 0 |
| ENSG00000167992 | VWCE      | 11 | 61258286  | 61295424  | protein_coding | 221,90 | 0 |
| ENSG00000163879 | DNALI1    | 1  | 37556919  | 37566857  | protein_coding | 221,48 | 0 |
| ENSG00000160703 | NLRX1     | 11 | 119166568 | 119184016 | protein_coding | 221,40 | 0 |
| ENSG00000179715 | PCED1B    | 12 | 47079603  | 47236662  | protein_coding | 221,30 | 0 |
| ENSG00000136448 | NMT1      | 17 | 45051610  | 45109016  | protein_coding | 221,30 | 0 |
| ENSG00000179627 | ZBTB42    | 14 | 104800596 | 104804712 | protein_coding | 221,20 | 0 |
| ENSG00000010327 | STAB1     | 3  | 52495338  | 52524495  | protein_coding | 221,09 | 0 |
| ENSG00000180776 | ZDHHC20   | 13 | 21372573  | 21459370  | protein_coding | 220,91 | 0 |
| ENSG00000134333 | LDHA      | 11 | 18394388  | 18408425  | protein_coding | 220,76 | 0 |
| ENSG00000111077 | TNS2      | 12 | 53046969  | 53064372  | protein_coding | 219,88 | 0 |
| ENSG00000178033 | FAM26E    | 6  | 116511646 | 116524792 | protein_coding | 219,30 | 0 |
| ENSG00000033100 | CHPF2     | 7  | 151232489 | 151238827 | protein_coding | 219,27 | 0 |
| ENSG00000070614 | NDST1     | 5  | 150485818 | 150558211 | protein_coding | 219,25 | 0 |
| ENSG00000092094 | OSGEP     | 14 | 20446411  | 20455105  | protein_coding | 219,13 | 0 |
| ENSG00000158966 | CACHD1    | 1  | 64470792  | 64693058  | protein_coding | 218,77 | 0 |
| ENSG00000204272 | LINC01420 | X  | 56729259  | 56818380  | protein_coding | 217,56 | 0 |
| ENSG00000171105 | INSR      | 19 | 7112255   | 7294034   | protein_coding | 217,16 | 0 |
| ENSG00000143409 | FAM63A    | 1  | 150996086 | 151008375 | protein_coding | 217,00 | 0 |
| ENSG00000239857 | GET4      | 7  | 876552    | 896436    | protein_coding | 216,60 | 0 |
| ENSG00000111801 | BTN3A3    | 6  | 26440472  | 26453415  | protein_coding | 216,40 | 0 |
| ENSG00000125740 | FOSB      | 19 | 45467995  | 45475179  | protein_coding | 216,03 | 0 |
| ENSG00000101856 | PGRMC1    | X  | 119236245 | 119244466 | protein_coding | 216,02 | 0 |
| ENSG00000171314 | PGAM1     | 10 | 97426160  | 97433441  | protein_coding | 215,91 | 0 |
| ENSG00000136274 | NACAD     | 7  | 45080438  | 45088914  | protein_coding | 215,84 | 0 |
| ENSG00000184371 | CSF1      | 1  | 109910242 | 109930992 | protein_coding | 215,60 | 0 |
| ENSG00000131669 | NINJ1     | 9  | 93121489  | 93134288  | protein_coding | 215,55 | 0 |
| ENSG00000177548 | RABEP2    | 16 | 28904421  | 28936526  | protein_coding | 215,44 | 0 |
| ENSG00000172432 | GTPBP2    | 6  | 43605316  | 43629162  | protein_coding | 215,38 | 0 |
| ENSG00000149541 | B3GAT3    | 11 | 62615296  | 62622175  | protein_coding | 215,38 | 0 |
| ENSG00000112139 | MDGA1     | 6  | 37630679  | 37699306  | protein_coding | 215,20 | 0 |
| ENSG00000014216 | CAPN1     | 11 | 65180566  | 65212006  | protein_coding | 215,13 | 0 |
| ENSG00000139636 | LMBR1L    | 12 | 49096551  | 49110900  | protein_coding | 215,05 | 0 |
| ENSG00000119632 | IFI27L2   | 14 | 94127779  | 94130253  | protein_coding | 213,78 | 0 |
| ENSG00000112473 | SLC39A7   | 6  | 33200445  | 33204439  | protein_coding | 213,60 | 0 |
| ENSG00000169851 | PCDH7     | 4  | 30720415  | 31146805  | protein_coding | 213,50 | 0 |
| ENSG00000160113 | NR2F6     | 19 | 17231883  | 17245940  | protein_coding | 212,88 | 0 |
| ENSG00000066322 | ELOVL1    | 1  | 43363397  | 43368074  | protein_coding | 212,83 | 0 |
| ENSG00000160781 | PAQR6     | 1  | 156243321 | 156248117 | protein_coding | 212,70 | 0 |
| ENSG00000169515 | CCDC8     | 19 | 46410372  | 46413584  | protein_coding | 212,60 | 0 |

|                 |            |    |           |           |                |        |   |
|-----------------|------------|----|-----------|-----------|----------------|--------|---|
| ENSG00000165916 | PSMC3      | 11 | 47418769  | 47426473  | protein_coding | 212,34 | 0 |
| ENSG00000007129 | CEACAM21   | 19 | 41549518  | 41586844  | protein_coding | 212,10 | 0 |
| ENSG00000175264 | CHST1      | 11 | 45648877  | 45665622  | protein_coding | 211,80 | 0 |
| ENSG00000143772 | ITPKB      | 1  | 226631690 | 226739323 | protein_coding | 211,70 | 0 |
| ENSG00000166670 | MMP10      | 11 | 102770503 | 102780628 | protein_coding | 211,40 | 0 |
| ENSG00000108840 | HDAC5      | 17 | 44076746  | 44123702  | protein_coding | 211,38 | 0 |
| ENSG00000155254 | MARVELD1   | 10 | 97713173  | 97718152  | protein_coding | 211,27 | 0 |
| ENSG00000127507 | ADGRE2     | 19 | 14732393  | 14778541  | protein_coding | 211,10 | 0 |
| ENSG00000073605 | GSDMB      | 17 | 39904595  | 39919854  | protein_coding | 210,80 | 0 |
| ENSG00000107738 | C10orf54   | 10 | 71747559  | 71773498  | protein_coding | 210,60 | 0 |
| ENSG00000106479 | ZNF862     | 7  | 149838367 | 149867479 | protein_coding | 210,58 | 0 |
| ENSG00000088827 | SIGLEC1    | 20 | 3686970   | 3707128   | protein_coding | 210,40 | 0 |
| ENSG00000183397 | C19orf71   | 19 | 3539154   | 3544030   | protein_coding | 210,20 | 0 |
| ENSG00000165424 | ZCCHC24    | 10 | 79382325  | 79445627  | protein_coding | 209,89 | 0 |
| ENSG00000068903 | SIRT2      | 19 | 38878555  | 38899862  | protein_coding | 209,83 | 0 |
| ENSG00000113719 | ERGIC1     | 5  | 172834275 | 172952685 | protein_coding | 209,76 | 0 |
| ENSG00000106077 | ABHD11     | 7  | 73736094  | 73738867  | protein_coding | 209,72 | 0 |
| ENSG00000163344 | PMVK       | 1  | 154924734 | 154936991 | protein_coding | 209,69 | 0 |
| ENSG00000174738 | NR1D2      | 3  | 23945260  | 23980618  | protein_coding | 209,60 | 0 |
| ENSG00000165194 | PCDH19     | X  | 100291644 | 100410273 | protein_coding | 209,52 | 0 |
| ENSG00000176022 | B3GALT6    | 1  | 1232265   | 1235041   | protein_coding | 208,68 | 0 |
| ENSG00000155008 | APOOL      | X  | 85003826  | 85093316  | protein_coding | 208,65 | 0 |
| ENSG00000142871 | CYR61      | 1  | 85580761  | 85583962  | protein_coding | 208,50 | 0 |
| ENSG00000189339 | SLC35E2B   | 1  | 1659529   | 1692728   | protein_coding | 208,38 | 0 |
| ENSG00000163346 | PBXIP1     | 1  | 154944076 | 154956123 | protein_coding | 207,95 | 0 |
| ENSG00000185499 | MUC1       | 1  | 155185824 | 155192916 | protein_coding | 207,80 | 0 |
| ENSG00000203747 | FCGR3A     | 1  | 161541759 | 161550737 | protein_coding | 207,80 | 0 |
| ENSG00000162572 | SCNN1D     | 1  | 1280436   | 1292029   | protein_coding | 207,60 | 0 |
| ENSG00000213853 | EMP2       | 16 | 10528422  | 10580698  | protein_coding | 207,14 | 0 |
| ENSG00000089050 | RBBP9      | 20 | 18486540  | 18497243  | protein_coding | 207,00 | 0 |
| ENSG00000136193 | SCRN1      | 7  | 29920103  | 29990289  | protein_coding | 206,66 | 0 |
| ENSG0000026036  | RTEL1-TNFR | 20 | 63659300  | 63698684  | protein_coding | 206,30 | 0 |
| ENSG00000184207 | PGP        | 16 | 2211997   | 2214807   | protein_coding | 206,28 | 0 |
| ENSG00000239779 | WBP1       | 2  | 74458329  | 74460891  | protein_coding | 206,00 | 0 |
| ENSG00000169239 | CA5B       | X  | 15688830  | 15788409  | protein_coding | 205,90 | 0 |
| ENSG00000109846 | CRYAB      | 11 | 111908565 | 111923722 | protein_coding | 205,90 | 0 |
| ENSG00000185404 | SP140L     | 2  | 230327184 | 230403732 | protein_coding | 205,46 | 0 |
| ENSG00000124762 | CDKN1A     | 6  | 36676460  | 36687339  | protein_coding | 205,18 | 0 |
| ENSG00000155393 | HEATR3     | 16 | 50065941  | 50106387  | protein_coding | 205,12 | 0 |
| ENSG00000119326 | CTNNA1     | 9  | 108942569 | 109013529 | protein_coding | 205,11 | 0 |
| ENSG00000253276 | CCDC71L    | 7  | 106656765 | 106660996 | protein_coding | 204,80 | 0 |
| ENSG00000179909 | ZNF154     | 19 | 57697367  | 57709194  | protein_coding | 204,70 | 0 |
| ENSG00000138131 | LOXL4      | 10 | 98247690  | 98268250  | protein_coding | 204,50 | 0 |
| ENSG00000110080 | ST3GAL4    | 11 | 126355640 | 126440344 | protein_coding | 204,49 | 0 |
| ENSG00000018699 | TTC27      | 2  | 32628032  | 32821051  | protein_coding | 204,46 | 0 |
| ENSG00000271383 | NBPF19     | 1  | 149390623 | 149556361 | protein_coding | 204,40 | 0 |
| ENSG00000165682 | CLEC1B     | 12 | 9985642   | 10013424  | protein_coding | 204,30 | 0 |
| ENSG00000011028 | MRC2       | 17 | 62627401  | 62693597  | protein_coding | 204,21 | 0 |
| ENSG00000148600 | CDHR1      | 10 | 84194635  | 84219621  | protein_coding | 203,80 | 0 |
| ENSG00000136205 | TNS3       | 7  | 47275154  | 47582558  | protein_coding | 203,80 | 0 |
| ENSG00000242732 | RGAG4      | X  | 72127110  | 72131901  | protein_coding | 203,40 | 0 |
| ENSG00000136732 | GYPC       | 2  | 126655933 | 126696675 | protein_coding | 203,10 | 0 |
| ENSG00000138172 | CALHM2     | 10 | 103446786 | 103452402 | protein_coding | 203,08 | 0 |
| ENSG00000177352 | CCDC71     | 3  | 49162535  | 49166321  | protein_coding | 202,81 | 0 |
| ENSG00000102924 | CBLN1      | 16 | 49277917  | 49281831  | protein_coding | 202,79 | 0 |
| ENSG00000244094 | SPRR2F     | 1  | 153112114 | 153113515 | protein_coding | 202,30 | 0 |
| ENSG00000163220 | S100A9     | 1  | 153357854 | 153361027 | protein_coding | 201,90 | 0 |
| ENSG00000178726 | THBD       | 20 | 23045633  | 23049741  | protein_coding | 201,80 | 0 |

|                 |           |    |           |           |                |        |   |
|-----------------|-----------|----|-----------|-----------|----------------|--------|---|
| ENSG00000166188 | ZNF319    | 16 | 57994668  | 58000453  | protein_coding | 201,40 | 0 |
| ENSG00000170915 | PAQR8     | 6  | 52361421  | 52407777  | protein_coding | 201,11 | 0 |
| ENSG00000151640 | DPYSL4    | 10 | 132186900 | 132205776 | protein_coding | 201,10 | 0 |
| ENSG00000105227 | PRX       | 19 | 40393768  | 40413366  | protein_coding | 200,80 | 0 |
| ENSG00000133027 | PEMT      | 17 | 17505563  | 17591708  | protein_coding | 200,30 | 0 |
| ENSG00000150990 | DHX37     | 12 | 124946825 | 124989122 | protein_coding | 199,55 | 0 |
| ENSG00000119403 | PHF19     | 9  | 120855652 | 120894896 | protein_coding | 199,00 | 0 |
| ENSG00000137033 | IL33      | 9  | 6215786   | 6257983   | protein_coding | 199,00 | 0 |
| ENSG00000137965 | IFI44     | 1  | 78649796  | 78664078  | protein_coding | 198,90 | 0 |
| ENSG00000171791 | BCL2      | 18 | 63123346  | 63320128  | protein_coding | 198,70 | 0 |
| ENSG00000163873 | GRIK3     | 1  | 36795527  | 37034129  | protein_coding | 198,53 | 0 |
| ENSG00000160445 | ZER1      | 9  | 128729786 | 128772414 | protein_coding | 198,50 | 0 |
| ENSG00000124217 | MOCS3     | 20 | 50958826  | 50963931  | protein_coding | 198,25 | 0 |
| ENSG00000067191 | CACNB1    | 17 | 39173456  | 39197703  | protein_coding | 198,21 | 0 |
| ENSG00000100139 | MICALL1   | 22 | 37905657  | 37942822  | protein_coding | 198,20 | 0 |
| ENSG00000121577 | POPDC2    | 3  | 119636457 | 119665324 | protein_coding | 198,17 | 0 |
| ENSG00000112787 | FBRSL1    | 12 | 132489551 | 132585188 | protein_coding | 198,07 | 0 |
| ENSG00000240065 | PSMB9     | 6  | 32844136  | 32859585  | protein_coding | 197,50 | 0 |
| ENSG00000155966 | AFF2      | X  | 148500619 | 149000663 | protein_coding | 196,57 | 0 |
| ENSG00000150540 | HNMT      | 2  | 137964020 | 138016364 | protein_coding | 196,10 | 0 |
| ENSG00000166148 | AVPR1A    | 12 | 63142759  | 63150942  | protein_coding | 195,94 | 0 |
| ENSG00000204673 | AKT1S1    | 19 | 49869033  | 49878459  | protein_coding | 195,71 | 0 |
| ENSG00000100897 | DCAF11    | 14 | 24114195  | 24125242  | protein_coding | 195,65 | 0 |
| ENSG00000224877 | C17orf89  | 17 | 81239239  | 81241281  | protein_coding | 195,40 | 0 |
| ENSG00000126821 | SGPP1     | 14 | 63684214  | 63728039  | protein_coding | 195,32 | 0 |
| ENSG00000078061 | ARAF      | X  | 47561100  | 47571920  | protein_coding | 195,25 | 0 |
| ENSG00000182446 | NPLOC4    | 17 | 81556887  | 81648465  | protein_coding | 195,10 | 0 |
| ENSG00000099256 | PRTFDC1   | 10 | 24848607  | 24952604  | protein_coding | 195,10 | 0 |
| ENSG00000130653 | PNPLA7    | 9  | 137459953 | 137550534 | protein_coding | 195,07 | 0 |
| ENSG00000008710 | PKD1      | 16 | 2088710   | 2135898   | protein_coding | 194,99 | 0 |
| ENSG00000162614 | NEXN      | 1  | 77888513  | 77943895  | protein_coding | 194,80 | 0 |
| ENSG00000154025 | SLC5A10   | 17 | 18950345  | 19022595  | protein_coding | 194,50 | 0 |
| ENSG00000172578 | KLHL6     | 3  | 183487531 | 183555689 | protein_coding | 193,30 | 0 |
| ENSG00000138821 | SLC39A8   | 4  | 102251041 | 102431258 | protein_coding | 193,21 | 0 |
| ENSG00000006025 | OSBPL7    | 17 | 47807372  | 47821834  | protein_coding | 193,00 | 0 |
| ENSG00000198898 | CAPZA2    | 7  | 116811070 | 116922049 | protein_coding | 192,98 | 0 |
| ENSG00000170234 | PWWP2A    | 5  | 160061801 | 160119423 | protein_coding | 192,98 | 0 |
| ENSG00000128394 | APOBEC3F  | 22 | 39040604  | 39053910  | protein_coding | 192,80 | 0 |
| ENSG00000120458 | MSANTD2   | 11 | 124766498 | 124800673 | protein_coding | 192,64 | 0 |
| ENSG00000169896 | ITGAM     | 16 | 31259990  | 31332892  | protein_coding | 192,60 | 0 |
| ENSG00000148824 | MTG1      | 10 | 133394094 | 133421307 | protein_coding | 192,55 | 0 |
| ENSG00000177508 | IRX3      | 16 | 54283304  | 54286763  | protein_coding | 192,20 | 0 |
| ENSG00000174775 | HRAS      | 11 | 532242    | 537287    | protein_coding | 191,89 | 0 |
| ENSG00000139546 | TARBP2    | 12 | 53500921  | 53506431  | protein_coding | 191,09 | 0 |
| ENSG00000119280 | C1orf198  | 1  | 230837119 | 230869589 | protein_coding | 191,07 | 0 |
| ENSG00000142396 | ERVK3-1   | 19 | 58305319  | 58315663  | protein_coding | 190,80 | 0 |
| ENSG00000182836 | PLCXD3    | 5  | 41306954  | 41510628  | protein_coding | 190,74 | 0 |
| ENSG00000111348 | ARHGDI1   | 12 | 14942017  | 14961728  | protein_coding | 190,10 | 0 |
| ENSG00000198797 | BRINP2    | 1  | 177171497 | 177282422 | protein_coding | 190,00 | 0 |
| ENSG00000165186 | PTCHD1    | X  | 23334015  | 23404372  | protein_coding | 190,00 | 0 |
| ENSG00000167995 | BEST1     | 11 | 61949821  | 61965515  | protein_coding | 189,87 | 0 |
| ENSG00000137338 | PGBD1     | 6  | 28281572  | 28302549  | protein_coding | 189,85 | 0 |
| ENSG00000204351 | SKIV2L    | 6  | 31959080  | 31969755  | protein_coding | 189,83 | 0 |
| ENSG00000168792 | ABHD15    | 17 | 29560547  | 29567137  | protein_coding | 189,60 | 0 |
| ENSG00000158373 | HIST1H2BD | 6  | 26158146  | 26171349  | protein_coding | 189,60 | 0 |
| ENSG00000129691 | ASH2L     | 8  | 38105242  | 38144076  | protein_coding | 189,59 | 0 |
| ENSG00000140688 | C16orf58  | 16 | 31489471  | 31509309  | protein_coding | 189,54 | 0 |
| ENSG00000149781 | FERMT3    | 11 | 64206678  | 64223886  | protein_coding | 189,50 | 0 |



|                 |          |    |           |           |                |        |   |
|-----------------|----------|----|-----------|-----------|----------------|--------|---|
| ENSG00000173540 | GMPPB    | 3  | 49716844  | 49723951  | protein_coding | 189,24 | 0 |
| ENSG00000165804 | ZNF219   | 14 | 21090046  | 21104722  | protein_coding | 189,10 | 0 |
| ENSG00000218891 | ZNF579   | 19 | 55576770  | 55580845  | protein_coding | 189,00 | 0 |
| ENSG00000107130 | NCS1     | 9  | 130172578 | 130237304 | protein_coding | 188,82 | 0 |
| ENSG00000032444 | PNPLA6   | 19 | 7534004   | 7561764   | protein_coding | 188,81 | 0 |
| ENSG00000119917 | IFIT3    | 10 | 89327894  | 89340971  | protein_coding | 188,80 | 0 |
| ENSG00000215271 | HOMEZ    | 14 | 23272422  | 23299447  | protein_coding | 188,52 | 0 |
| ENSG00000139899 | CBLN3    | 14 | 24426532  | 24430954  | protein_coding | 188,00 | 0 |
| ENSG00000138606 | SHF      | 15 | 45167214  | 45201175  | protein_coding | 187,62 | 0 |
| ENSG00000141682 | PMAIP1   | 18 | 59899948  | 59904306  | protein_coding | 187,50 | 0 |
| ENSG00000204065 | TCEAL5   | X  | 103273691 | 103276872 | protein_coding | 187,20 | 0 |
| ENSG00000104870 | FCGRT    | 19 | 49506816  | 49526333  | protein_coding | 186,49 | 0 |
| ENSG00000072778 | ACADVL   | 17 | 7217125   | 7225273   | protein_coding | 186,30 | 0 |
| ENSG00000099625 | CBARP    | 19 | 1228287   | 1238027   | protein_coding | 186,21 | 0 |
| ENSG00000165949 | IFI27    | 14 | 94104836  | 94116698  | protein_coding | 185,93 | 0 |
| ENSG00000099337 | KCNK6    | 19 | 38319844  | 38332076  | protein_coding | 185,88 | 0 |
| ENSG00000185686 | PRAME    | 22 | 22547701  | 22559361  | protein_coding | 185,75 | 0 |
| ENSG00000140545 | MFGE8    | 15 | 88898683  | 88913411  | protein_coding | 185,16 | 0 |
| ENSG00000156113 | KCNMA1   | 10 | 76869601  | 77638595  | protein_coding | 184,83 | 0 |
| ENSG00000100908 | EMC9     | 14 | 24138959  | 24141588  | protein_coding | 184,79 | 0 |
| ENSG00000156381 | ANKRD9   | 14 | 102501760 | 102509799 | protein_coding | 184,65 | 0 |
| ENSG00000164294 | GPX8     | 5  | 55160118  | 55167071  | protein_coding | 184,50 | 0 |
| ENSG00000111652 | COPS7A   | 12 | 6723741   | 6731875   | protein_coding | 184,48 | 0 |
| ENSG00000134369 | NAV1     | 1  | 201622885 | 201826969 | protein_coding | 184,46 | 0 |
| ENSG00000163644 | PPM1K    | 4  | 88257620  | 88284769  | protein_coding | 184,40 | 0 |
| ENSG00000139641 | ESYT1    | 12 | 56118250  | 56144671  | protein_coding | 184,30 | 0 |
| ENSG00000177283 | FZD8     | 10 | 35638249  | 35642278  | protein_coding | 184,10 | 0 |
| ENSG00000180353 | HCLS1    | 3  | 121631399 | 121660927 | protein_coding | 183,50 | 0 |
| ENSG00000132357 | CARD6    | 5  | 40841184  | 40860175  | protein_coding | 183,40 | 0 |
| ENSG00000101265 | RASSF2   | 20 | 4780023   | 4823645   | protein_coding | 183,35 | 0 |
| ENSG00000198768 | APCDD1L  | 20 | 58459101  | 58515131  | protein_coding | 183,20 | 0 |
| ENSG00000076716 | GPC4     | X  | 133300103 | 133415490 | protein_coding | 183,14 | 0 |
| ENSG00000198952 | SMG5     | 1  | 156249224 | 156282825 | protein_coding | 183,13 | 0 |
| ENSG00000211445 | GPX3     | 5  | 151020438 | 151028993 | protein_coding | 182,95 | 0 |
| ENSG00000166848 | TERF2IP  | 16 | 75647786  | 75761872  | protein_coding | 182,85 | 0 |
| ENSG00000198889 | DCAF12L1 | X  | 126549383 | 126552851 | protein_coding | 182,40 | 0 |
| ENSG00000105339 | DENND3   | 8  | 141117278 | 141195808 | protein_coding | 182,39 | 0 |
| ENSG00000114735 | HEMK1    | 3  | 50569152  | 50596168  | protein_coding | 181,94 | 0 |
| ENSG00000095321 | CRAT     | 9  | 129094810 | 129111189 | protein_coding | 181,81 | 0 |
| ENSG00000168781 | PPIP5K1  | 15 | 43533462  | 43590253  | protein_coding | 181,73 | 0 |
| ENSG00000119943 | PYROXD2  | 10 | 98383565  | 98415184  | protein_coding | 181,60 | 0 |
| ENSG00000187837 | HIST1H1C | 6  | 26055787  | 26056428  | protein_coding | 181,57 | 0 |
| ENSG00000162747 | FCGR3B   | 1  | 161623196 | 161631963 | protein_coding | 181,40 | 0 |
| ENSG00000189292 | FAM150B  | 2  | 279558    | 288851    | protein_coding | 181,30 | 0 |
| ENSG00000174151 | CYB561D1 | 1  | 109494052 | 109502932 | protein_coding | 180,90 | 0 |
| ENSG00000138835 | RGS3     | 9  | 113444731 | 113597743 | protein_coding | 180,87 | 0 |
| ENSG00000169981 | ZNF35    | 3  | 44648727  | 44660791  | protein_coding | 180,82 | 0 |
| ENSG00000100151 | PICK1    | 22 | 38056311  | 38075701  | protein_coding | 180,42 | 0 |
| ENSG00000254585 | MAGEL2   | 15 | 23643544  | 23647841  | protein_coding | 180,40 | 0 |
| ENSG00000130988 | RGN      | X  | 47078355  | 47093314  | protein_coding | 180,40 | 0 |
| ENSG00000178691 | SUZ12    | 17 | 31937018  | 32001045  | protein_coding | 180,17 | 0 |
| ENSG00000141698 | NT5C3B   | 17 | 41825181  | 41836263  | protein_coding | 179,90 | 0 |
| ENSG00000164880 | INTS1    | 7  | 1470277   | 1504367   | protein_coding | 179,82 | 0 |
| ENSG00000198055 | GRK6     | 5  | 177403204 | 177442901 | protein_coding | 179,61 | 0 |
| ENSG00000185985 | SLITRK2  | X  | 145817832 | 145825842 | protein_coding | 179,40 | 0 |
| ENSG00000082014 | SMARCD3  | 7  | 151238764 | 151277896 | protein_coding | 179,38 | 0 |
| ENSG00000130731 | C16orf13 | 16 | 634427    | 636366    | protein_coding | 179,24 | 0 |
| ENSG00000185920 | PTCH1    | 9  | 95442980  | 95517057  | protein_coding | 179,05 | 0 |

|                 |           |    |           |           |                |        |   |
|-----------------|-----------|----|-----------|-----------|----------------|--------|---|
| ENSG00000100918 | REC8      | 14 | 24171853  | 24180257  | protein_coding | 179,00 | 0 |
| ENSG00000213047 | DENND1B   | 1  | 197504748 | 197775696 | protein_coding | 179,00 | 0 |
| ENSG00000169231 | THBS3     | 1  | 155195588 | 155209051 | protein_coding | 178,69 | 0 |
| ENSG00000007392 | LUC7L     | 16 | 188969    | 229463    | protein_coding | 178,42 | 0 |
| ENSG00000124212 | PTGIS     | 20 | 49503874  | 49568146  | protein_coding | 178,40 | 0 |
| ENSG00000170296 | GABARAP   | 17 | 7240014   | 7242770   | protein_coding | 177,95 | 0 |
| ENSG00000154556 | SORBS2    | 4  | 185585444 | 185956652 | protein_coding | 177,79 | 0 |
| ENSG00000174227 | PIGG      | 4  | 499210    | 540196    | protein_coding | 177,69 | 0 |
| ENSG00000155926 | SLA       | 8  | 133036724 | 133103054 | protein_coding | 177,50 | 0 |
| ENSG00000107957 | SH3PXD2A  | 10 | 103594027 | 103855543 | protein_coding | 177,40 | 0 |
| ENSG00000254087 | LYN       | 8  | 55879813  | 56014168  | protein_coding | 177,20 | 0 |
| ENSG00000103187 | COTL1     | 16 | 84565594  | 84618077  | protein_coding | 177,07 | 0 |
| ENSG00000164543 | STK17A    | 7  | 43582758  | 43626786  | protein_coding | 176,69 | 0 |
| ENSG00000137941 | TLL7      | 1  | 83865028  | 83999150  | protein_coding | 176,64 | 0 |
| ENSG00000235173 | HGH1      | 8  | 144137769 | 144140843 | protein_coding | 176,50 | 0 |
| ENSG00000180398 | MCFD2     | 2  | 46901870  | 46941855  | protein_coding | 176,34 | 0 |
| ENSG00000100478 | AP4S1     | 14 | 31025106  | 31096450  | protein_coding | 175,80 | 0 |
| ENSG00000136840 | ST6GALNAC | 9  | 127907886 | 127917038 | protein_coding | 175,70 | 0 |
| ENSG00000163428 | LRRC58    | 3  | 120324509 | 120349339 | protein_coding | 175,36 | 0 |
| ENSG00000042286 | AIFM2     | 10 | 70098223  | 70132934  | protein_coding | 175,30 | 0 |
| ENSG00000130962 | PRRG1     | X  | 37349275  | 37457295  | protein_coding | 175,26 | 0 |
| ENSG00000099364 | FBXL19    | 16 | 30923055  | 30948783  | protein_coding | 175,02 | 0 |
| ENSG00000184216 | IRAK1     | X  | 154010500 | 154019980 | protein_coding | 174,97 | 0 |
| ENSG00000198502 | HLA-DRB5  | 6  | 32517343  | 32530287  | protein_coding | 174,80 | 0 |
| ENSG00000128602 | SMO       | 7  | 129188872 | 129213545 | protein_coding | 174,50 | 0 |
| ENSG00000143554 | SLC27A3   | 1  | 153774354 | 153780157 | protein_coding | 174,20 | 0 |
| ENSG00000100083 | GGA1      | 22 | 37608475  | 37633564  | protein_coding | 174,11 | 0 |
| ENSG00000137486 | ARRB1     | 11 | 75264182  | 75351705  | protein_coding | 174,09 | 0 |
| ENSG00000127124 | HIVEP3    | 1  | 41506365  | 42035925  | protein_coding | 173,91 | 0 |
| ENSG00000124313 | IQSEC2    | X  | 53232876  | 53321324  | protein_coding | 173,80 | 0 |
| ENSG00000138061 | CYP1B1    | 2  | 38066973  | 38109902  | protein_coding | 173,74 | 0 |
| ENSG00000161640 | SIGLEC11  | 19 | 49948985  | 49961172  | protein_coding | 173,60 | 0 |
| ENSG00000085644 | ZNF213    | 16 | 3129777   | 3142805   | protein_coding | 173,48 | 0 |
| ENSG00000188803 | SHISA6    | 17 | 11241263  | 11564063  | protein_coding | 173,40 | 0 |
| ENSG00000090013 | BLVRB     | 19 | 40447789  | 40465840  | protein_coding | 173,36 | 0 |
| ENSG00000102309 | PIN4      | X  | 72181353  | 72302926  | protein_coding | 173,33 | 0 |
| ENSG00000141994 | DUS3L     | 19 | 5784832   | 5791238   | protein_coding | 173,28 | 0 |
| ENSG00000157502 | MUM1L1    | X  | 106168305 | 106208956 | protein_coding | 173,24 | 0 |
| ENSG00000131591 | C1orf159  | 1  | 1081818   | 1116361   | protein_coding | 173,24 | 0 |
| ENSG00000162931 | TRIM17    | 1  | 228407940 | 228416861 | protein_coding | 173,20 | 0 |
| ENSG00000166265 | CYR1      | 21 | 26466209  | 26573284  | protein_coding | 173,10 | 0 |
| ENSG00000138111 | TMEM180   | 10 | 102461395 | 102477045 | protein_coding | 172,80 | 0 |
| ENSG00000179593 | ALOX15B   | 17 | 8039017   | 8049134   | protein_coding | 172,40 | 0 |
| ENSG00000197093 | GAL3ST4   | 7  | 100159244 | 100168750 | protein_coding | 172,40 | 0 |
| ENSG00000174939 | ASPHD1    | 16 | 29900375  | 29919864  | protein_coding | 172,33 | 0 |
| ENSG00000165359 | DDX26B    | X  | 135520659 | 135582510 | protein_coding | 172,10 | 0 |
| ENSG00000127463 | EMC1      | 1  | 19215664  | 19251552  | protein_coding | 171,64 | 0 |
| ENSG00000180773 | SLC36A4   | 11 | 93144171  | 93197964  | protein_coding | 171,58 | 0 |
| ENSG00000102057 | KCND1     | X  | 48961378  | 48971569  | protein_coding | 170,90 | 0 |
| ENSG00000189143 | CLDN4     | 7  | 73799542  | 73832693  | protein_coding | 170,73 | 0 |
| ENSG00000177106 | EPS8L2    | 11 | 694438    | 727727    | protein_coding | 170,50 | 0 |
| ENSG00000275074 | NUDT18    | 8  | 22106872  | 22109419  | protein_coding | 170,50 | 0 |
| ENSG00000079215 | SLC1A3    | 5  | 36606355  | 36688334  | protein_coding | 170,50 | 0 |
| ENSG00000161956 | SENP3     | 17 | 7561875   | 7571969   | protein_coding | 170,40 | 0 |
| ENSG00000124587 | PEX6      | 6  | 42963870  | 42979220  | protein_coding | 170,28 | 0 |
| ENSG00000113083 | LOX       | 5  | 122063195 | 122078285 | protein_coding | 170,20 | 0 |
| ENSG00000147041 | SYTL5     | X  | 38006582  | 38128819  | protein_coding | 169,90 | 0 |
| ENSG00000088280 | ASAP3     | 1  | 23428563  | 23484568  | protein_coding | 169,77 | 0 |

|                 |            |    |           |           |                |        |   |
|-----------------|------------|----|-----------|-----------|----------------|--------|---|
| ENSG00000100241 | SBF1       | 22 | 50445000  | 50475024  | protein_coding | 169,51 | 0 |
| ENSG00000204839 | MROH6      | 8  | 143566187 | 143572971 | protein_coding | 169,36 | 0 |
| ENSG00000165140 | FBP1       | 9  | 94603133  | 94640249  | protein_coding | 169,30 | 0 |
| ENSG00000125538 | IL1B       | 2  | 112829751 | 112836903 | protein_coding | 169,20 | 0 |
| ENSG00000135409 | AMHR2      | 12 | 53423855  | 53431534  | protein_coding | 168,50 | 0 |
| ENSG00000166432 | ZMAT1      | X  | 101882288 | 101932031 | protein_coding | 168,43 | 0 |
| ENSG00000111671 | SPSB2      | 12 | 6870935   | 6889358   | protein_coding | 168,29 | 0 |
| ENSG00000166923 | GREM1      | 15 | 32717974  | 32745107  | protein_coding | 168,12 | 0 |
| ENSG00000187474 | FPR3       | 19 | 51795163  | 51826189  | protein_coding | 167,90 | 0 |
| ENSG00000132879 | FBXO44     | 1  | 11654375  | 11663327  | protein_coding | 167,80 | 0 |
| ENSG00000159212 | CLIC6      | 21 | 34669389  | 34718227  | protein_coding | 167,70 | 0 |
| ENSG00000130511 | SSBP4      | 19 | 18418864  | 18434562  | protein_coding | 167,67 | 0 |
| ENSG00000165030 | NFIL3      | 9  | 91409045  | 91423862  | protein_coding | 167,43 | 0 |
| ENSG00000099849 | RASSF7     | 11 | 560404    | 564021    | protein_coding | 167,42 | 0 |
| ENSG00000110324 | IL10RA     | 11 | 117986348 | 118001483 | protein_coding | 167,42 | 0 |
| ENSG00000187244 | BCAM       | 19 | 44809059  | 44821420  | protein_coding | 167,30 | 0 |
| ENSG00000170262 | MRAP       | 21 | 32291813  | 32314784  | protein_coding | 167,20 | 0 |
| ENSG00000110090 | CPT1A      | 11 | 68754620  | 68844410  | protein_coding | 167,20 | 0 |
| ENSG00000130270 | ATP8B3     | 19 | 1782075   | 1812276   | protein_coding | 167,10 | 0 |
| ENSG00000164221 | CCDC112    | 5  | 115267188 | 115296831 | protein_coding | 167,09 | 0 |
| ENSG00000136010 | ALDH1L2    | 12 | 105019784 | 105084577 | protein_coding | 167,08 | 0 |
| ENSG00000156804 | FBXO32     | 8  | 123497889 | 123541206 | protein_coding | 166,99 | 0 |
| ENSG00000125841 | NRSN2      | 20 | 346782    | 359660    | protein_coding | 166,99 | 0 |
| ENSG00000107816 | LZTS2      | 10 | 100996618 | 101007836 | protein_coding | 166,70 | 0 |
| ENSG00000188647 | PTAR1      | 9  | 69709522  | 69759959  | protein_coding | 166,28 | 0 |
| ENSG00000123427 | METTL21B   | 12 | 57771492  | 57782798  | protein_coding | 166,00 | 0 |
| ENSG00000143369 | ECM1       | 1  | 150508062 | 150513789 | protein_coding | 166,00 | 0 |
| ENSG00000196544 | BORCS6     | 17 | 8188333   | 8190907   | protein_coding | 165,92 | 0 |
| ENSG00000164237 | CMBL       | 5  | 10275875  | 10308026  | protein_coding | 165,91 | 0 |
| ENSG00000167244 | IGF2       | 11 | 2129112   | 2141238   | protein_coding | 165,82 | 0 |
| ENSG0000011347  | SYT7       | 11 | 61515313  | 61581148  | protein_coding | 165,59 | 0 |
| ENSG00000076555 | ACACB      | 12 | 109116595 | 109268226 | protein_coding | 165,32 | 0 |
| ENSG00000183258 | DDX41      | 5  | 177511577 | 177517469 | protein_coding | 165,30 | 0 |
| ENSG00000232434 | C9orf172   | 9  | 136844415 | 136848801 | protein_coding | 165,28 | 0 |
| ENSG00000125354 | 09/01/2006 | X  | 119615724 | 119693370 | protein_coding | 165,04 | 0 |
| ENSG00000163975 | MFI2       | 3  | 196988621 | 197029816 | protein_coding | 165,00 | 0 |
| ENSG00000119457 | SLC46A2    | 9  | 112878920 | 112890913 | protein_coding | 164,80 | 0 |
| ENSG00000064932 | SBNO2      | 19 | 1107636   | 1174283   | protein_coding | 164,50 | 0 |
| ENSG00000163453 | IGFBP7     | 4  | 57030773  | 57110385  | protein_coding | 164,46 | 0 |
| ENSG00000213699 | SLC35F6    | 2  | 26764284  | 26781231  | protein_coding | 164,23 | 0 |
| ENSG0000010610  | CD4        | 12 | 6786858   | 6820808   | protein_coding | 164,10 | 0 |
| ENSG00000173898 | SPTBN2     | 11 | 66685248  | 66729226  | protein_coding | 164,07 | 0 |
| ENSG00000141933 | TPGS1      | 19 | 507497    | 519654    | protein_coding | 164,00 | 0 |
| ENSG00000177427 | MIEF2      | 17 | 18260534  | 18266552  | protein_coding | 163,90 | 0 |
| ENSG00000114023 | FAM162A    | 3  | 122384176 | 122412334 | protein_coding | 163,81 | 0 |
| ENSG00000170545 | SMAGP      | 12 | 51244558  | 51270890  | protein_coding | 163,81 | 0 |
| ENSG00000136059 | VILL       | 3  | 37988059  | 38007188  | protein_coding | 163,73 | 0 |
| ENSG00000186814 | ZSCAN30    | 18 | 35251058  | 35290245  | protein_coding | 163,73 | 0 |
| ENSG00000025039 | RRAGD      | 6  | 89364636  | 89412270  | protein_coding | 163,45 | 0 |
| ENSG00000106948 | AKNA       | 9  | 114334156 | 114394405 | protein_coding | 162,95 | 0 |
| ENSG00000144681 | STAC       | 3  | 36380344  | 36548007  | protein_coding | 162,89 | 0 |
| ENSG00000081237 | PTPRC      | 1  | 198638671 | 198757283 | protein_coding | 162,76 | 0 |
| ENSG00000126091 | ST3GAL3    | 1  | 43705824  | 43931165  | protein_coding | 162,74 | 0 |
| ENSG00000166750 | SLFN5      | 17 | 35243036  | 35273655  | protein_coding | 162,73 | 0 |
| ENSG00000155659 | VSIG4      | X  | 66021738  | 66040125  | protein_coding | 162,60 | 0 |
| ENSG00000182511 | FES        | 15 | 90883695  | 90895776  | protein_coding | 162,42 | 0 |
| ENSG00000081014 | AP4E1      | 15 | 50908672  | 51005900  | protein_coding | 162,25 | 0 |
| ENSG00000151690 | MFSD6      | 2  | 190408355 | 190509205 | protein_coding | 162,05 | 0 |

|                 |            |    |           |           |                |        |   |
|-----------------|------------|----|-----------|-----------|----------------|--------|---|
| ENSG00000140450 | ARRDC4     | 15 | 97960698  | 97973838  | protein_coding | 161,78 | 0 |
| ENSG00000160219 | GAB3       | X  | 154675249 | 154751583 | protein_coding | 161,64 | 0 |
| ENSG00000157870 | FAM213B    | 1  | 2586491   | 2591469   | protein_coding | 161,07 | 0 |
| ENSG00000137491 | SLCO2B1    | 11 | 75100563  | 75206549  | protein_coding | 161,00 | 0 |
| ENSG00000168765 | GSTM4      | 1  | 109656081 | 109674836 | protein_coding | 161,00 | 0 |
| ENSG00000063660 | GPC1       | 2  | 240435671 | 240468078 | protein_coding | 160,83 | 0 |
| ENSG00000118946 | PCDH17     | 13 | 57631810  | 57729311  | protein_coding | 160,50 | 0 |
| ENSG00000188906 | LRRK2      | 12 | 40196744  | 40369285  | protein_coding | 160,20 | 0 |
| ENSG00000164111 | ANXA5      | 4  | 121667955 | 121697113 | protein_coding | 159,89 | 0 |
| ENSG00000108387 | 09/01/2004 | 17 | 58520250  | 58540818  | protein_coding | 159,70 | 0 |
| ENSG00000276600 | RAB7B      | 1  | 205976740 | 206003461 | protein_coding | 159,70 | 0 |
| ENSG00000130717 | UCK1       | 9  | 131523801 | 131531268 | protein_coding | 159,65 | 0 |
| ENSG00000130827 | PLXNA3     | X  | 154458281 | 154477779 | protein_coding | 159,37 | 0 |
| ENSG00000197763 | TXNRD3     | 3  | 126571779 | 126655155 | protein_coding | 159,18 | 0 |
| ENSG00000184588 | PDE4B      | 1  | 65792514  | 66374579  | protein_coding | 159,10 | 0 |
| ENSG00000158163 | DZIP1L     | 3  | 138061990 | 138115818 | protein_coding | 158,80 | 0 |
| ENSG00000172403 | SYNPO2     | 4  | 118850688 | 119061247 | protein_coding | 158,64 | 0 |
| ENSG00000128564 | VGF        | 7  | 101162509 | 101165593 | protein_coding | 158,30 | 0 |
| ENSG00000215183 | MSMP       | 9  | 35752990  | 35756613  | protein_coding | 157,83 | 0 |
| ENSG00000185477 | GPRIN3     | 4  | 89236386  | 89308010  | protein_coding | 157,70 | 0 |
| ENSG00000183617 | MRPL54     | 19 | 3762664   | 3768575   | protein_coding | 157,66 | 0 |
| ENSG00000144810 | COL8A1     | 3  | 99638475  | 99799226  | protein_coding | 157,60 | 0 |
| ENSG00000081985 | IL12RB2    | 1  | 67307364  | 67396900  | protein_coding | 157,50 | 0 |
| ENSG00000100299 | ARSA       | 22 | 50622754  | 50628173  | protein_coding | 157,46 | 0 |
| ENSG00000181744 | C3orf58    | 3  | 143971798 | 144048719 | protein_coding | 157,45 | 0 |
| ENSG00000108784 | NAGLU      | 17 | 42536172  | 42544449  | protein_coding | 157,44 | 0 |
| ENSG00000146072 | TNFRSF21   | 6  | 47231532  | 47309905  | protein_coding | 157,36 | 0 |
| ENSG00000007520 | TSR3       | 16 | 1349240   | 1351911   | protein_coding | 157,33 | 0 |
| ENSG00000267796 | LIN37      | 19 | 35748361  | 35754519  | protein_coding | 157,10 | 0 |
| ENSG00000204381 | LAYN       | 11 | 111540280 | 111561745 | protein_coding | 157,10 | 0 |
| ENSG00000148356 | LRSAM1     | 9  | 127451486 | 127503501 | protein_coding | 157,03 | 0 |
| ENSG00000185885 | IFITM1     | 11 | 313506    | 315272    | protein_coding | 156,70 | 0 |
| ENSG00000158560 | DYNC1I1    | 7  | 95772506  | 96110322  | protein_coding | 156,70 | 0 |
| ENSG00000179846 | NKPD1      | 19 | 45149750  | 45160150  | protein_coding | 156,60 | 0 |
| ENSG00000243678 | NME2       | 17 | 51165435  | 51171747  | protein_coding | 156,42 | 0 |
| ENSG00000183979 | NPB        | 17 | 81900745  | 81902905  | protein_coding | 156,30 | 0 |
| ENSG00000168056 | LTBP3      | 11 | 65538560  | 65558930  | protein_coding | 156,26 | 0 |
| ENSG00000177239 | MAN1B1     | 9  | 137086927 | 137109187 | protein_coding | 155,97 | 0 |
| ENSG00000164088 | PPM1M      | 3  | 52245793  | 52250597  | protein_coding | 155,90 | 0 |
| ENSG00000164849 | GPR146     | 7  | 1044576   | 1059261   | protein_coding | 155,70 | 0 |
| ENSG00000184702 | 09/01/2005 | 22 | 19714464  | 19724772  | protein_coding | 155,60 | 0 |
| ENSG00000073169 | ENSG000000 | 22 | 50200979  | 50217616  | protein_coding | 155,39 | 0 |
| ENSG00000175265 | GOLGA8A    | 15 | 34379068  | 34437466  | protein_coding | 155,37 | 0 |
| ENSG00000083814 | ZNF671     | 19 | 57719751  | 57727624  | protein_coding | 155,27 | 0 |
| ENSG00000103254 | FAM173A    | 16 | 720581    | 722601    | protein_coding | 154,75 | 0 |
| ENSG00000171617 | ENC1       | 5  | 74627406  | 74641424  | protein_coding | 154,72 | 0 |
| ENSG00000212864 | RNF208     | 9  | 137220247 | 137221581 | protein_coding | 154,60 | 0 |
| ENSG00000103226 | NOMO3      | 16 | 16232495  | 16294814  | protein_coding | 154,40 | 0 |
| ENSG00000123095 | BHLHE41    | 12 | 26120026  | 26125127  | protein_coding | 154,40 | 0 |
| ENSG00000215440 | NPEPL1     | 20 | 58689131  | 58719238  | protein_coding | 154,38 | 0 |
| ENSG00000184675 | AMER1      | X  | 64185117  | 64205744  | protein_coding | 154,30 | 0 |
| ENSG00000136877 | FPGS       | 9  | 127794597 | 127814327 | protein_coding | 153,95 | 0 |
| ENSG00000214357 | NEURL1B    | 5  | 172641266 | 172691540 | protein_coding | 153,90 | 0 |
| ENSG00000183837 | PNMA3      | X  | 153056409 | 153060467 | protein_coding | 153,73 | 0 |
| ENSG00000145242 | EPHA5      | 4  | 65319563  | 65670495  | protein_coding | 153,70 | 0 |
| ENSG00000105639 | JAK3       | 19 | 17824780  | 17848071  | protein_coding | 153,64 | 0 |
| ENSG00000005379 | BZRAP1     | 17 | 58301228  | 58328760  | protein_coding | 153,60 | 0 |
| ENSG00000111669 | TPI1       | 12 | 6867119   | 6870948   | protein_coding | 153,31 | 0 |

|                 |           |    |           |           |                |        |   |
|-----------------|-----------|----|-----------|-----------|----------------|--------|---|
| ENSG00000214706 | IFRD2     | 3  | 50287732  | 50292918  | protein_coding | 153,30 | 0 |
| ENSG00000163902 | RPN1      | 3  | 128619970 | 128681075 | protein_coding | 153,12 | 0 |
| ENSG00000182902 | SLC25A18  | 22 | 17563439  | 17590994  | protein_coding | 152,64 | 0 |
| ENSG00000160271 | RALGDS    | 9  | 133097720 | 133149334 | protein_coding | 152,29 | 0 |
| ENSG00000108557 | RAI1      | 17 | 17681473  | 17811453  | protein_coding | 152,26 | 0 |
| ENSG00000102218 | RP2       | X  | 46836940  | 46882358  | protein_coding | 152,25 | 0 |
| ENSG00000104518 | GSDMD     | 8  | 143553207 | 143563062 | protein_coding | 152,09 | 0 |
| ENSG00000162496 | DHRS3     | 1  | 12567910  | 12617731  | protein_coding | 152,08 | 0 |
| ENSG00000134030 | CTIF      | 18 | 48539046  | 48863217  | protein_coding | 152,05 | 0 |
| ENSG00000127054 | CPSF3L    | 1  | 1311585   | 1324691   | protein_coding | 151,97 | 0 |
| ENSG00000155970 | MICU3     | 8  | 17027238  | 17122644  | protein_coding | 151,70 | 0 |
| ENSG00000185973 | TMLHE     | X  | 155490115 | 155669944 | protein_coding | 151,50 | 0 |
| ENSG00000088543 | C3orf18   | 3  | 50558025  | 50571027  | protein_coding | 151,10 | 0 |
| ENSG00000179344 | HLA-DQB1  | 6  | 32659467  | 32668383  | protein_coding | 151,00 | 0 |
| ENSG00000111276 | CDKN1B    | 12 | 12715058  | 12722371  | protein_coding | 150,87 | 0 |
| ENSG00000180667 | YOD1      | 1  | 207043849 | 207052980 | protein_coding | 150,85 | 0 |
| ENSG00000079150 | FKBP7     | 2  | 178463664 | 178478600 | protein_coding | 150,82 | 0 |
| ENSG00000087088 | BAX       | 19 | 48954815  | 48961798  | protein_coding | 150,81 | 0 |
| ENSG00000179604 | CDC42EP4  | 17 | 73283624  | 73312175  | protein_coding | 150,73 | 0 |
| ENSG00000162777 | DENND2D   | 1  | 111187174 | 111204535 | protein_coding | 150,20 | 0 |
| ENSG00000124006 | OBSL1     | 2  | 219550729 | 219571859 | protein_coding | 150,18 | 0 |
| ENSG00000103168 | TAF1C     | 16 | 84177847  | 84187070  | protein_coding | 150,16 | 0 |
| ENSG00000120049 | KCNIP2    | 10 | 101825974 | 101843920 | protein_coding | 149,90 | 0 |
| ENSG00000172123 | SLFN12    | 17 | 35411060  | 35433283  | protein_coding | 149,80 | 0 |
| ENSG00000269190 | FBXO17    | 19 | 38941401  | 38975910  | protein_coding | 149,71 | 0 |
| ENSG00000125503 | PPP1R12C  | 19 | 55090913  | 55117559  | protein_coding | 149,66 | 0 |
| ENSG00000117586 | TNFSF4    | 1  | 173183734 | 173207313 | protein_coding | 149,64 | 0 |
| ENSG00000166275 | BORCS7    | 10 | 102854223 | 102864961 | protein_coding | 149,61 | 0 |
| ENSG00000170540 | ARL6IP1   | 16 | 18791667  | 18801678  | protein_coding | 149,59 | 0 |
| ENSG00000183833 | MAATS1    | 3  | 119703022 | 119767102 | protein_coding | 149,58 | 0 |
| ENSG00000100577 | GSTZ1     | 14 | 77320884  | 77331597  | protein_coding | 149,54 | 0 |
| ENSG00000151914 | DST       | 6  | 56457987  | 56954628  | protein_coding | 149,53 | 0 |
| ENSG00000171295 | ZNF440    | 19 | 11814284  | 11835201  | protein_coding | 149,50 | 0 |
| ENSG00000110876 | SELPLG    | 12 | 108622277 | 108633959 | protein_coding | 149,50 | 0 |
| ENSG00000181577 | C6orf223  | 6  | 44000580  | 44005958  | protein_coding | 149,20 | 0 |
| ENSG00000129932 | DOHH      | 19 | 3490821   | 3500940   | protein_coding | 149,17 | 0 |
| ENSG00000157259 | GATAD1    | 7  | 92447453  | 92458836  | protein_coding | 149,09 | 0 |
| ENSG00000112658 | SRF       | 6  | 43171299  | 43181507  | protein_coding | 148,79 | 0 |
| ENSG00000174428 | GTF2IRD2B | 7  | 75092573  | 75149817  | protein_coding | 148,50 | 0 |
| ENSG00000139679 | LPAR6     | 13 | 48389567  | 48444704  | protein_coding | 148,45 | 0 |
| ENSG00000100368 | CSF2RB    | 22 | 36913628  | 36940449  | protein_coding | 148,40 | 0 |
| ENSG00000171522 | PTGER4    | 5  | 40679498  | 40693735  | protein_coding | 148,40 | 0 |
| ENSG00000162065 | TBC1D24   | 16 | 2475118   | 2505734   | protein_coding | 148,31 | 0 |
| ENSG00000226763 | SRRM5     | 19 | 43596617  | 43614497  | protein_coding | 148,26 | 0 |
| ENSG00000181652 | ATG9B     | 7  | 151012209 | 151024499 | protein_coding | 148,18 | 0 |
| ENSG00000183323 | CCDC125   | 5  | 69280175  | 69332809  | protein_coding | 148,15 | 0 |
| ENSG00000111224 | PARP11    | 12 | 3791047   | 3873448   | protein_coding | 148,05 | 0 |
| ENSG00000109743 | BST1      | 4  | 15702950  | 15738313  | protein_coding | 148,00 | 0 |
| ENSG00000174099 | MSRB3     | 12 | 65278643  | 65488244  | protein_coding | 147,48 | 0 |
| ENSG00000089280 | FUS       | 16 | 31180110  | 31194871  | protein_coding | 147,46 | 0 |
| ENSG00000139044 | B4GALNT3  | 12 | 460364    | 563509    | protein_coding | 147,26 | 0 |
| ENSG00000136816 | TOR1B     | 9  | 129803153 | 129811281 | protein_coding | 147,14 | 0 |
| ENSG00000100345 | MYH9      | 22 | 36281281  | 36388018  | protein_coding | 147,12 | 0 |
| ENSG00000021355 | SERPINB1  | 6  | 2832332   | 2842006   | protein_coding | 147,02 | 0 |
| ENSG00000179409 | GEMIN4    | 17 | 744414    | 753999    | protein_coding | 146,97 | 0 |
| ENSG00000181284 | TMEM102   | 17 | 7435443   | 7437679   | protein_coding | 146,60 | 0 |
| ENSG00000167641 | PPP1R14A  | 19 | 38251237  | 38256591  | protein_coding | 146,50 | 0 |
| ENSG00000188404 | SELL      | 1  | 169690667 | 169711698 | protein_coding | 146,40 | 0 |

|                 |          |    |           |           |                |        |   |
|-----------------|----------|----|-----------|-----------|----------------|--------|---|
| ENSG00000160868 | CYP3A4   | 7  | 99756960  | 99784265  | protein_coding | 146,30 | 0 |
| ENSG00000139726 | DENR     | 12 | 122752774 | 122771064 | protein_coding | 146,26 | 0 |
| ENSG00000082074 | FYB      | 5  | 39105236  | 39274528  | protein_coding | 146,10 | 0 |
| ENSG00000119820 | YIPF4    | 2  | 32277910  | 32316594  | protein_coding | 145,90 | 0 |
| ENSG00000153234 | NR4A2    | 2  | 156324432 | 156342348 | protein_coding | 145,87 | 0 |
| ENSG00000135821 | GLUL     | 1  | 182381704 | 182392206 | protein_coding | 145,46 | 0 |
| ENSG00000116833 | NR5A2    | 1  | 200027602 | 200177424 | protein_coding | 145,39 | 0 |
| ENSG00000125962 | ARMCX5   | X  | 102599168 | 102604159 | protein_coding | 145,30 | 0 |
| ENSG00000172164 | SNTB1    | 8  | 120535745 | 120813273 | protein_coding | 145,26 | 0 |
| ENSG00000126247 | CAPNS1   | 19 | 36139575  | 36150353  | protein_coding | 145,19 | 0 |
| ENSG00000185504 | FAAP100  | 17 | 81539885  | 81553961  | protein_coding | 145,13 | 0 |
| ENSG00000197780 | TAF13    | 1  | 109062486 | 109076002 | protein_coding | 144,83 | 0 |
| ENSG00000184515 | BEX5     | X  | 102153708 | 102156057 | protein_coding | 144,80 | 0 |
| ENSG00000197746 | PSAP     | 10 | 71816298  | 71851375  | protein_coding | 144,60 | 0 |
| ENSG00000140675 | SLC5A2   | 16 | 31483002  | 31490860  | protein_coding | 143,52 | 0 |
| ENSG00000108590 | MED31    | 17 | 6643315   | 6651634   | protein_coding | 143,24 | 0 |
| ENSG00000163110 | PDLIM5   | 4  | 94451857  | 94668227  | protein_coding | 143,22 | 0 |
| ENSG00000005206 | SPPL2B   | 19 | 2328615   | 2354806   | protein_coding | 143,09 | 0 |
| ENSG00000166997 | CNPY4    | 7  | 100119613 | 100125511 | protein_coding | 143,00 | 0 |
| ENSG00000112964 | GHR      | 5  | 42423777  | 42721878  | protein_coding | 142,60 | 0 |
| ENSG00000188730 | VWC2     | 7  | 49773661  | 49921950  | protein_coding | 142,40 | 0 |
| ENSG00000164099 | PRSS12   | 4  | 118280038 | 118353003 | protein_coding | 142,40 | 0 |
| ENSG00000078808 | SDF4     | 1  | 1216908   | 1232031   | protein_coding | 142,35 | 0 |
| ENSG00000153976 | HS3ST3A1 | 17 | 13495689  | 13601927  | protein_coding | 142,30 | 0 |
| ENSG00000182534 | MXRA7    | 17 | 76672551  | 76711016  | protein_coding | 142,19 | 0 |
| ENSG00000130005 | GAMT     | 19 | 1397084   | 1401570   | protein_coding | 142,18 | 0 |
| ENSG00000196235 | SUPT5H   | 19 | 39436156  | 39476670  | protein_coding | 142,16 | 0 |
| ENSG00000197728 | RPS26    | 12 | 56041853  | 56044675  | protein_coding | 141,75 | 0 |
| ENSG00000185024 | BRF1     | 14 | 105209286 | 105315589 | protein_coding | 141,70 | 0 |
| ENSG00000228672 | PROB1    | 5  | 139390592 | 139395713 | protein_coding | 141,70 | 0 |
| ENSG00000132635 | PCED1A   | 20 | 2835314   | 2841190   | protein_coding | 141,68 | 0 |
| ENSG00000062716 | VMP1     | 17 | 59707192  | 59842255  | protein_coding | 141,55 | 0 |
| ENSG00000135002 | RFK      | 9  | 76385517  | 76394517  | protein_coding | 141,50 | 0 |
| ENSG00000132522 | GPS2     | 17 | 7311324   | 7315564   | protein_coding | 141,49 | 0 |
| ENSG00000157637 | SLC38A10 | 17 | 81245000  | 81295547  | protein_coding | 141,48 | 0 |
| ENSG00000168301 | KCTD6    | 3  | 58492114  | 58502360  | protein_coding | 141,43 | 0 |
| ENSG00000139508 | SLC46A3  | 13 | 28700064  | 28718970  | protein_coding | 141,40 | 0 |
| ENSG00000198794 | SCAMP5   | 15 | 74957219  | 75021496  | protein_coding | 141,20 | 0 |
| ENSG00000107147 | KCNT1    | 9  | 135702185 | 135795508 | protein_coding | 141,14 | 0 |
| ENSG00000166925 | TSC22D4  | 7  | 100463359 | 100479279 | protein_coding | 140,83 | 0 |
| ENSG00000185246 | PRPF39   | 14 | 45084099  | 45116282  | protein_coding | 140,60 | 0 |
| ENSG00000102996 | MMP15    | 16 | 58025566  | 58046901  | protein_coding | 140,33 | 0 |
| ENSG00000072274 | TFRC     | 3  | 196027183 | 196082189 | protein_coding | 140,15 | 0 |
| ENSG00000143398 | PIP5K1A  | 1  | 151197949 | 151249536 | protein_coding | 140,15 | 0 |
| ENSG00000129625 | REEP5    | 5  | 112876379 | 112922539 | protein_coding | 140,04 | 0 |
| ENSG00000114573 | ATP6V1A  | 3  | 113747019 | 113812056 | protein_coding | 139,84 | 0 |
| ENSG00000168116 | KIAA1586 | 6  | 57046532  | 57055239  | protein_coding | 139,73 | 0 |
| ENSG00000150977 | RILPL2   | 12 | 123410683 | 123436717 | protein_coding | 139,54 | 0 |
| ENSG00000148377 | IDI2     | 10 | 1018907   | 1025859   | protein_coding | 139,31 | 0 |
| ENSG00000157881 | PANK4    | 1  | 2508533   | 2526628   | protein_coding | 139,16 | 0 |
| ENSG00000139190 | VAMP1    | 12 | 6462237   | 6470987   | protein_coding | 139,10 | 0 |
| ENSG00000170370 | EMX2     | 10 | 117542444 | 117549546 | protein_coding | 138,93 | 0 |
| ENSG00000177706 | FAM20C   | 7  | 192969    | 260745    | protein_coding | 138,60 | 0 |
| ENSG00000181904 | C5orf24  | 5  | 134845680 | 134859737 | protein_coding | 138,53 | 0 |
| ENSG00000149927 | DOC2A    | 16 | 30005509  | 30023270  | protein_coding | 138,45 | 0 |
| ENSG00000018280 | SLC11A1  | 2  | 218382029 | 218396894 | protein_coding | 138,40 | 0 |
| ENSG00000148297 | MED22    | 9  | 133338323 | 133348131 | protein_coding | 138,37 | 0 |
| ENSG00000131080 | EDA2R    | X  | 66595637  | 66639298  | protein_coding | 138,00 | 0 |

|                 |          |    |           |           |                |        |   |
|-----------------|----------|----|-----------|-----------|----------------|--------|---|
| ENSG00000130309 | COLGALT1 | 19 | 17555594  | 17583162  | protein_coding | 138,00 | 0 |
| ENSG00000042493 | CAPG     | 2  | 85394748  | 85418432  | protein_coding | 137,94 | 0 |
| ENSG00000169031 | COL4A3   | 2  | 227164565 | 227314792 | protein_coding | 137,80 | 0 |
| ENSG00000113273 | ARSB     | 5  | 78777209  | 78986087  | protein_coding | 137,62 | 0 |
| ENSG00000215218 | UBE2QL1  | 5  | 6448623   | 6494909   | protein_coding | 137,50 | 0 |
| ENSG00000109066 | TMEM104  | 17 | 74776483  | 74839779  | protein_coding | 137,32 | 0 |
| ENSG00000114993 | RTKN     | 2  | 74425836  | 74442422  | protein_coding | 137,28 | 0 |
| ENSG00000072135 | PTPN18   | 2  | 130356007 | 130375409 | protein_coding | 137,08 | 0 |
| ENSG00000162032 | SPSB3    | 16 | 1776712   | 1793700   | protein_coding | 136,96 | 0 |
| ENSG00000143119 | CD53     | 1  | 110873154 | 110899928 | protein_coding | 136,92 | 0 |
| ENSG00000168874 | ATOH8    | 2  | 85751344  | 85788066  | protein_coding | 136,80 | 0 |
| ENSG00000000938 | FGR      | 1  | 27612064  | 27635277  | protein_coding | 136,70 | 0 |
| ENSG00000132932 | ATP8A2   | 13 | 25372071  | 26025851  | protein_coding | 136,50 | 0 |
| ENSG00000120832 | MTERF2   | 12 | 106977291 | 106987166 | protein_coding | 136,39 | 0 |
| ENSG00000189420 | ZFP92    | X  | 153418322 | 153426481 | protein_coding | 136,30 | 0 |
| ENSG00000091831 | ESR1     | 6  | 151656691 | 152129619 | protein_coding | 136,00 | 0 |
| ENSG00000138623 | SEMA7A   | 15 | 74409289  | 74434467  | protein_coding | 135,78 | 0 |
| ENSG00000197208 | SLC22A4  | 5  | 132294443 | 132344206 | protein_coding | 135,70 | 0 |
| ENSG00000198598 | MMP17    | 12 | 131828393 | 131851783 | protein_coding | 135,50 | 0 |
| ENSG00000125730 | C3       | 19 | 6677704   | 6730562   | protein_coding | 135,36 | 0 |
| ENSG00000163930 | BAP1     | 3  | 52401013  | 52410350  | protein_coding | 135,23 | 0 |
| ENSG00000130592 | LSP1     | 11 | 1852970   | 1892267   | protein_coding | 135,20 | 0 |
| ENSG00000135604 | STX11    | 6  | 144150526 | 144188370 | protein_coding | 135,17 | 0 |
| ENSG00000196141 | SPATS2L  | 2  | 200305881 | 200482263 | protein_coding | 135,04 | 0 |
| ENSG00000164038 | SLC9B2   | 4  | 103019868 | 103085829 | protein_coding | 134,93 | 0 |
| ENSG00000113805 | CNTN3    | 3  | 74262568  | 74521140  | protein_coding | 134,90 | 0 |
| ENSG00000157601 | MX1      | 21 | 41420304  | 41459214  | protein_coding | 134,61 | 0 |
| ENSG00000060749 | QSER1    | 11 | 32893178  | 32993316  | protein_coding | 134,51 | 0 |
| ENSG00000131042 | LILRB2   | 19 | 54238904  | 54281184  | protein_coding | 134,50 | 0 |
| ENSG00000227500 | SCAMP4   | 19 | 1905214   | 1926013   | protein_coding | 134,35 | 0 |
| ENSG00000173581 | CCDC106  | 19 | 55641062  | 55653161  | protein_coding | 134,19 | 0 |
| ENSG00000166501 | PRKCB    | 16 | 23836001  | 24220611  | protein_coding | 134,10 | 0 |
| ENSG00000143631 | FLG      | 1  | 152302175 | 152325203 | protein_coding | 133,91 | 0 |
| ENSG00000113263 | ITK      | 5  | 157142933 | 157255191 | protein_coding | 133,90 | 0 |
| ENSG00000166166 | TRMT61A  | 14 | 103529184 | 103537073 | protein_coding | 133,73 | 0 |
| ENSG00000240053 | LY6G5B   | 6  | 31670167  | 31673776  | protein_coding | 133,60 | 0 |
| ENSG00000054965 | FAM168A  | 11 | 73400487  | 73598189  | protein_coding | 133,36 | 0 |
| ENSG00000121413 | ZSCAN18  | 19 | 58083838  | 58118427  | protein_coding | 133,35 | 0 |
| ENSG00000173327 | MAP3K11  | 11 | 65597755  | 65615382  | protein_coding | 133,33 | 0 |
| ENSG00000196465 | MYL6B    | 12 | 56152256  | 56159647  | protein_coding | 133,24 | 0 |
| ENSG00000007384 | RHBDF1   | 16 | 58059     | 76355     | protein_coding | 133,20 | 0 |
| ENSG00000123131 | PRDX4    | X  | 23664262  | 23686399  | protein_coding | 133,17 | 0 |
| ENSG00000081041 | CXCL2    | 4  | 74097035  | 74099293  | protein_coding | 133,10 | 0 |
| ENSG00000095303 | PTGS1    | 9  | 122370530 | 122395703 | protein_coding | 133,06 | 0 |
| ENSG00000107562 | CXCL12   | 10 | 44370165  | 44386493  | protein_coding | 133,00 | 0 |
| ENSG00000153048 | CARHSP1  | 16 | 8852942   | 8869012   | protein_coding | 132,99 | 0 |
| ENSG00000051128 | HOMER3   | 19 | 18929201  | 18941261  | protein_coding | 132,93 | 0 |
| ENSG00000103253 | HAGHL    | 16 | 726936    | 735525    | protein_coding | 132,82 | 0 |
| ENSG00000100644 | HIF1A    | 14 | 61695513  | 61748259  | protein_coding | 132,49 | 0 |
| ENSG00000149480 | MTA2     | 11 | 62593214  | 62601840  | protein_coding | 132,20 | 0 |
| ENSG00000116604 | MEF2D    | 1  | 156463727 | 156500828 | protein_coding | 132,13 | 0 |
| ENSG00000113758 | DBN1     | 5  | 177456608 | 177474401 | protein_coding | 131,98 | 0 |
| ENSG00000100731 | PCNX     | 14 | 70907405  | 71115382  | protein_coding | 131,82 | 0 |
| ENSG00000106638 | TBL2     | 7  | 73568932  | 73578791  | protein_coding | 131,66 | 0 |
| ENSG00000179943 | FIZ1     | 19 | 55591371  | 55601970  | protein_coding | 131,36 | 0 |
| ENSG00000176871 | WSB2     | 12 | 118032694 | 118062430 | protein_coding | 131,34 | 0 |
| ENSG00000130829 | DUSP9    | X  | 153642492 | 153651326 | protein_coding | 131,20 | 0 |
| ENSG00000163463 | KRTCAP2  | 1  | 155169408 | 155173475 | protein_coding | 131,10 | 0 |

|                 |            |    |           |           |                |        |   |
|-----------------|------------|----|-----------|-----------|----------------|--------|---|
| ENSG00000168970 | JMJD7-PLA2 | 15 | 41828095  | 41848155  | protein_coding | 131,00 | 0 |
| ENSG00000146409 | SLC18B1    | 6  | 132769370 | 132798553 | protein_coding | 130,90 | 0 |
| ENSG00000270647 | TAF15      | 17 | 35713791  | 35864615  | protein_coding | 130,88 | 0 |
| ENSG00000171045 | TSNARE1    | 8  | 142212080 | 142403240 | protein_coding | 130,80 | 0 |
| ENSG00000130803 | ZNF317     | 19 | 9140380   | 9163424   | protein_coding | 130,75 | 0 |
| ENSG00000136444 | RSAD1      | 17 | 50478800  | 50485975  | protein_coding | 130,75 | 0 |
| ENSG00000125505 | MBOAT7     | 19 | 54173412  | 54189882  | protein_coding | 130,71 | 0 |
| ENSG00000169660 | HEXDC      | 17 | 82418318  | 82442645  | protein_coding | 130,65 | 0 |
| ENSG00000057657 | PRDM1      | 6  | 106086320 | 106109939 | protein_coding | 130,58 | 0 |
| ENSG00000111271 | ACAD10     | 12 | 111686056 | 111757107 | protein_coding | 130,42 | 0 |
| ENSG00000107897 | ACBD5      | 10 | 27195214  | 27242130  | protein_coding | 130,19 | 0 |
| ENSG00000147180 | ZNF711     | X  | 85244032  | 85273362  | protein_coding | 130,17 | 0 |
| ENSG00000106258 | CYP3A5     | 7  | 99648194  | 99679998  | protein_coding | 130,00 | 0 |
| ENSG00000182809 | CRIP2      | 14 | 105472962 | 105480170 | protein_coding | 129,90 | 0 |
| ENSG00000185262 | UBALD2     | 17 | 76265202  | 76271299  | protein_coding | 129,58 | 0 |
| ENSG00000110046 | ATG2A      | 11 | 64894546  | 64917248  | protein_coding | 129,35 | 0 |
| ENSG00000157823 | AP3S2      | 15 | 89830599  | 89894638  | protein_coding | 129,26 | 0 |
| ENSG00000186318 | BACE1      | 11 | 117285207 | 117316259 | protein_coding | 129,24 | 0 |
| ENSG00000122257 | RBBP6      | 16 | 24537693  | 24572863  | protein_coding | 128,99 | 0 |
| ENSG00000083838 | ZNF446     | 19 | 58474017  | 58481230  | protein_coding | 128,96 | 0 |
| ENSG00000123360 | PDE1B      | 12 | 54549350  | 54579239  | protein_coding | 128,90 | 0 |
| ENSG00000170962 | PDGFD      | 11 | 103907186 | 104164379 | protein_coding | 128,81 | 0 |
| ENSG00000213928 | IRF9       | 14 | 24161053  | 24166565  | protein_coding | 128,80 | 0 |
| ENSG00000125755 | SYMPK      | 19 | 45815410  | 45863290  | protein_coding | 128,79 | 0 |
| ENSG00000157326 | DHRS4      | 14 | 23953586  | 23969279  | protein_coding | 128,58 | 0 |
| ENSG00000213221 | DNLZ       | 9  | 136359480 | 136363789 | protein_coding | 128,20 | 0 |
| ENSG00000119777 | TMEM214    | 2  | 27032910  | 27041695  | protein_coding | 128,10 | 0 |
| ENSG00000146094 | DOK3       | 5  | 177501907 | 177511274 | protein_coding | 127,77 | 0 |
| ENSG00000130299 | GTPBP3     | 19 | 17334920  | 17342735  | protein_coding | 127,70 | 0 |
| ENSG00000125744 | RTN2       | 19 | 45485289  | 45497061  | protein_coding | 127,58 | 0 |
| ENSG00000172977 | KAT5       | 11 | 65711996  | 65719604  | protein_coding | 127,49 | 0 |
| ENSG00000270170 | NCBP2-AS2  | 3  | 196942623 | 196943540 | protein_coding | 127,40 | 0 |
| ENSG00000150594 | ADRA2A     | 10 | 111077163 | 111080907 | protein_coding | 127,30 | 0 |
| ENSG00000160226 | C21orf2    | 21 | 44328944  | 44339402  | protein_coding | 127,27 | 0 |
| ENSG00000115604 | IL18R1     | 2  | 102311529 | 102398775 | protein_coding | 127,14 | 0 |
| ENSG00000089127 | OAS1       | 12 | 112906777 | 112933222 | protein_coding | 126,90 | 0 |
| ENSG00000060718 | COL11A1    | 1  | 102876467 | 103108496 | protein_coding | 126,88 | 0 |
| ENSG00000167114 | SLC27A4    | 9  | 128340646 | 128361470 | protein_coding | 126,76 | 0 |
| ENSG00000049540 | ELN        | 7  | 74027789  | 74069907  | protein_coding | 126,58 | 0 |
| ENSG00000163823 | CCR1       | 3  | 46201709  | 46208396  | protein_coding | 126,55 | 0 |
| ENSG00000178202 | KDEL2      | 11 | 108472105 | 108498432 | protein_coding | 126,49 | 0 |
| ENSG00000180071 | ANKRD18A   | 9  | 38571358  | 38620660  | protein_coding | 126,40 | 0 |
| ENSG00000119737 | GPR75      | 2  | 53852913  | 53859989  | protein_coding | 126,29 | 0 |
| ENSG00000182108 | DEXI       | 16 | 10928891  | 10942460  | protein_coding | 126,26 | 0 |
| ENSG00000003400 | CASP10     | 2  | 201182881 | 201229406 | protein_coding | 126,23 | 0 |
| ENSG00000196998 | WDR45      | X  | 49071470  | 49101170  | protein_coding | 125,97 | 0 |
| ENSG00000102879 | CORO1A     | 16 | 30182827  | 30189076  | protein_coding | 125,80 | 0 |
| ENSG00000115041 | KCNIP3     | 2  | 95297304  | 95386083  | protein_coding | 125,80 | 0 |
| ENSG00000197818 | SLC9A8     | 20 | 49812713  | 49892242  | protein_coding | 125,50 | 0 |
| ENSG00000265681 | RPL17      | 18 | 49488453  | 49492523  | protein_coding | 125,50 | 0 |
| ENSG00000198814 | GK         | X  | 30653359  | 30731456  | protein_coding | 125,49 | 0 |
| ENSG00000003096 | KLHL13     | X  | 117897813 | 118117340 | protein_coding | 125,45 | 0 |
| ENSG00000198796 | ALPK2      | 18 | 58481247  | 58628957  | protein_coding | 125,20 | 0 |
| ENSG00000142207 | URB1       | 21 | 32311018  | 32393026  | protein_coding | 124,95 | 0 |
| ENSG00000074855 | ANO8       | 19 | 17323223  | 17334829  | protein_coding | 124,94 | 0 |
| ENSG00000169241 | SLC50A1    | 1  | 155135344 | 155138857 | protein_coding | 124,65 | 0 |
| ENSG00000175130 | MARCKSL1   | 1  | 32333832  | 32336379  | protein_coding | 124,65 | 0 |
| ENSG00000106565 | TMEM176B   | 7  | 150791285 | 150801360 | protein_coding | 124,36 | 0 |



|                 |            |    |           |           |                |        |   |
|-----------------|------------|----|-----------|-----------|----------------|--------|---|
| ENSG00000135740 | SLC9A5     | 16 | 67237683  | 67272190  | protein_coding | 124,31 | 0 |
| ENSG00000166183 | ASPG       | 14 | 104085679 | 104115581 | protein_coding | 124,30 | 0 |
| ENSG00000091622 | PITPNM3    | 17 | 6451264   | 6556494   | protein_coding | 124,19 | 0 |
| ENSG00000104946 | TBC1D17    | 19 | 49877425  | 49888749  | protein_coding | 124,18 | 0 |
| ENSG00000132024 | CC2D1A     | 19 | 13906201  | 13930879  | protein_coding | 124,06 | 0 |
| ENSG00000160877 | NACC1      | 19 | 13118103  | 13141141  | protein_coding | 124,05 | 0 |
| ENSG00000132170 | PPARG      | 3  | 12287368  | 12434356  | protein_coding | 124,04 | 0 |
| ENSG00000100292 | HMOX1      | 22 | 35380361  | 35394214  | protein_coding | 124,03 | 0 |
| ENSG00000162627 | SNX7       | 1  | 98661701  | 98760500  | protein_coding | 123,98 | 0 |
| ENSG00000279119 | ENSG000002 | 17 | 38727833  | 38728198  | protein_coding | 123,71 | 0 |
| ENSG00000128284 | APOL3      | 22 | 36140330  | 36166177  | protein_coding | 123,70 | 0 |
| ENSG00000166924 | NYAP1      | 7  | 100483927 | 100494799 | protein_coding | 123,70 | 0 |
| ENSG00000170275 | CRTAP      | 3  | 33113979  | 33147773  | protein_coding | 123,43 | 0 |
| ENSG00000204954 | C12orf73   | 12 | 103950202 | 103965708 | protein_coding | 123,29 | 0 |
| ENSG00000115459 | ELMOD3     | 2  | 85354394  | 85391752  | protein_coding | 123,18 | 0 |
| ENSG00000183783 | KCTD8      | 4  | 44173909  | 44448807  | protein_coding | 123,10 | 0 |
| ENSG00000131446 | MGAT1      | 5  | 180784782 | 180815652 | protein_coding | 122,81 | 0 |
| ENSG00000204248 | COL11A2    | 6  | 33162681  | 33192499  | protein_coding | 122,80 | 0 |
| ENSG00000164776 | PHKG1      | 7  | 56080283  | 56092996  | protein_coding | 122,79 | 0 |
| ENSG00000115902 | SLC1A4     | 2  | 64988477  | 65023865  | protein_coding | 122,77 | 0 |
| ENSG00000166927 | MS4A7      | 11 | 60378482  | 60395951  | protein_coding | 122,70 | 0 |
| ENSG00000150093 | ITGB1      | 10 | 32900319  | 33005792  | protein_coding | 122,66 | 0 |
| ENSG00000167972 | ABCA3      | 16 | 2275881   | 2340746   | protein_coding | 122,59 | 0 |
| ENSG00000130313 | PGLS       | 19 | 17511629  | 17521288  | protein_coding | 122,56 | 0 |
| ENSG00000136383 | ALPK3      | 15 | 84816680  | 84873482  | protein_coding | 122,37 | 0 |
| ENSG00000139597 | N4BP2L1    | 13 | 32400723  | 32428311  | protein_coding | 122,30 | 0 |
| ENSG00000197530 | MIB2       | 1  | 1615415   | 1630610   | protein_coding | 122,28 | 0 |
| ENSG00000115738 | ID2        | 2  | 8678845   | 8684453   | protein_coding | 122,26 | 0 |
| ENSG00000167378 | IRGQ       | 19 | 43584369  | 43596135  | protein_coding | 122,24 | 0 |
| ENSG00000120217 | CD274      | 9  | 5450503   | 5470566   | protein_coding | 122,10 | 0 |
| ENSG00000169105 | CHST14     | 15 | 40470998  | 40474571  | protein_coding | 121,86 | 0 |
| ENSG00000196639 | HRH1       | 3  | 11137093  | 11263557  | protein_coding | 121,83 | 0 |
| ENSG00000151692 | RNF144A    | 2  | 6917392   | 7068286   | protein_coding | 121,82 | 0 |
| ENSG00000161847 | RAVER1     | 19 | 10316212  | 10333640  | protein_coding | 121,77 | 0 |
| ENSG00000145029 | NICN1      | 3  | 49422946  | 49429326  | protein_coding | 121,63 | 0 |
| ENSG00000160323 | ADAMTS13   | 9  | 133414358 | 133459402 | protein_coding | 121,60 | 0 |
| ENSG00000166987 | MBD6       | 12 | 57520710  | 57530148  | protein_coding | 121,59 | 0 |
| ENSG00000006015 | C19orf60   | 19 | 18588685  | 18592336  | protein_coding | 121,52 | 0 |
| ENSG00000136160 | EDNRB      | 13 | 77895481  | 77919768  | protein_coding | 121,50 | 0 |
| ENSG00000166311 | SMPD1      | 11 | 6390431   | 6394998   | protein_coding | 121,49 | 0 |
| ENSG00000052802 | MSMO1      | 4  | 165327623 | 165343160 | protein_coding | 121,35 | 0 |
| ENSG00000243244 | STON1      | 2  | 48529383  | 48598513  | protein_coding | 120,79 | 0 |
| ENSG00000134970 | TMED7      | 5  | 115613508 | 115632992 | protein_coding | 120,61 | 0 |
| ENSG00000101986 | ABCD1      | X  | 153724868 | 153744762 | protein_coding | 120,60 | 0 |
| ENSG00000137404 | NRM        | 6  | 30688047  | 30691420  | protein_coding | 120,54 | 0 |
| ENSG00000119630 | PGF        | 14 | 74941834  | 74955784  | protein_coding | 120,47 | 0 |
| ENSG00000157557 | ETS2       | 21 | 38805307  | 38824955  | protein_coding | 120,25 | 0 |
| ENSG00000162300 | ZFPL1      | 11 | 65084223  | 65088400  | protein_coding | 120,04 | 0 |
| ENSG00000158019 | BRE        | 2  | 27889941  | 28338901  | protein_coding | 120,00 | 0 |
| ENSG00000169902 | TPST1      | 7  | 66205199  | 66420543  | protein_coding | 119,76 | 0 |
| ENSG00000164129 | NPY5R      | 4  | 163343939 | 163351934 | protein_coding | 119,70 | 0 |
| ENSG00000107874 | CUEDC2     | 10 | 102423245 | 102432661 | protein_coding | 119,46 | 0 |
| ENSG00000215251 | FASTKD5    | 20 | 3146519   | 3159897   | protein_coding | 119,39 | 0 |
| ENSG00000167874 | TMEM88     | 17 | 7855065   | 7856099   | protein_coding | 119,33 | 0 |
| ENSG00000101421 | CHMP4B     | 20 | 33811304  | 33854366  | protein_coding | 119,05 | 0 |
| ENSG00000245848 | CEBPA      | 19 | 33299934  | 33302564  | protein_coding | 119,00 | 0 |
| ENSG00000159640 | ACE        | 17 | 63477061  | 63498380  | protein_coding | 118,90 | 0 |
| ENSG00000107537 | PHYH       | 10 | 13277796  | 13302412  | protein_coding | 118,60 | 0 |

|                |            |    |           |           |                |        |   |
|----------------|------------|----|-----------|-----------|----------------|--------|---|
| ENSG0000055813 | CCDC85A    | 2  | 56184123  | 56386173  | protein_coding | 118,54 | 0 |
| ENSG0000102743 | SLC25A15   | 13 | 40789412  | 40810111  | protein_coding | 118,52 | 0 |
| ENSG0000109680 | TBC1D19    | 4  | 26576437  | 26755351  | protein_coding | 118,44 | 0 |
| ENSG0000165171 | WBSCR27    | 7  | 73834590  | 73842535  | protein_coding | 118,40 | 0 |
| ENSG0000198837 | DENND4B    | 1  | 153929501 | 153946696 | protein_coding | 118,32 | 0 |
| ENSG0000139344 | AMDHD1     | 12 | 95943293  | 95968716  | protein_coding | 118,08 | 0 |
| ENSG0000095015 | MAP3K1     | 5  | 56815574  | 56896152  | protein_coding | 118,08 | 0 |
| ENSG0000099910 | KLHL22     | 22 | 20441519  | 20495883  | protein_coding | 118,07 | 0 |
| ENSG0000062370 | ZNF112     | 19 | 44326555  | 44367217  | protein_coding | 118,00 | 0 |
| ENSG0000136068 | FLNB       | 3  | 58008400  | 58172251  | protein_coding | 117,93 | 0 |
| ENSG0000153936 | HS2ST1     | 1  | 86914648  | 87109998  | protein_coding | 117,71 | 0 |
| ENSG0000275342 | ENSG000002 | 8  | 8317736   | 8386498   | protein_coding | 117,60 | 0 |
| ENSG0000160789 | LMNA       | 1  | 156082573 | 156140089 | protein_coding | 117,52 | 0 |
| ENSG0000183260 | ABHD16B    | 20 | 63861498  | 63862988  | protein_coding | 117,50 | 0 |
| ENSG0000269335 | IKBKG      | X  | 154541199 | 154565046 | protein_coding | 117,19 | 0 |
| ENSG0000178026 | LRRC75B    | 22 | 24585620  | 24593208  | protein_coding | 117,00 | 0 |
| ENSG0000100802 | C14orf93   | 14 | 22985908  | 23010166  | protein_coding | 116,82 | 0 |
| ENSG0000162407 | PLPP3      | 1  | 56494747  | 56645301  | protein_coding | 116,79 | 0 |
| ENSG0000161395 | PGAP3      | 17 | 39671122  | 39696797  | protein_coding | 116,61 | 0 |
| ENSG0000135108 | FBXO21     | 12 | 117141988 | 117190531 | protein_coding | 116,50 | 0 |
| ENSG0000145536 | ADAMTS16   | 5  | 5140330   | 5320304   | protein_coding | 116,40 | 0 |
| ENSG0000117266 | CDK18      | 1  | 205504595 | 205532793 | protein_coding | 116,16 | 0 |
| ENSG0000137040 | RANBP6     | 9  | 6011043   | 6015625   | protein_coding | 116,13 | 0 |
| ENSG0000120318 | ARAP3      | 5  | 141653401 | 141682221 | protein_coding | 116,00 | 0 |
| ENSG0000143162 | CREG1      | 1  | 167529677 | 167553767 | protein_coding | 115,74 | 0 |
| ENSG0000138080 | EMILIN1    | 2  | 27078567  | 27086408  | protein_coding | 115,64 | 0 |
| ENSG0000149798 | CDC42EP2   | 11 | 65314818  | 65322429  | protein_coding | 115,23 | 0 |
| ENSG0000116001 | TIA1       | 2  | 70209444  | 70248660  | protein_coding | 115,16 | 0 |
| ENSG0000178761 | FAM219B    | 15 | 74899987  | 74907121  | protein_coding | 115,16 | 0 |
| ENSG0000163909 | HEYL       | 1  | 39624153  | 39639945  | protein_coding | 115,08 | 0 |
| ENSG0000183077 | AFMID      | 17 | 78187317  | 78207701  | protein_coding | 114,85 | 0 |
| ENSG0000100055 | CYTH4      | 22 | 37282027  | 37315345  | protein_coding | 114,80 | 0 |
| ENSG0000186998 | EMID1      | 22 | 29205851  | 29259597  | protein_coding | 114,79 | 0 |
| ENSG0000135678 | CPM        | 12 | 68842197  | 68971570  | protein_coding | 114,76 | 0 |
| ENSG0000169403 | PTAFR      | 1  | 28147166  | 28193936  | protein_coding | 114,70 | 0 |
| ENSG0000160973 | FOXH1      | 8  | 144473412 | 144476335 | protein_coding | 114,68 | 0 |
| ENSG0000090530 | P3H2       | 3  | 189956728 | 190122437 | protein_coding | 114,68 | 0 |
| ENSG0000161671 | EMC10      | 19 | 50476400  | 50490870  | protein_coding | 114,68 | 0 |
| ENSG0000132329 | RAMP1      | 2  | 237858893 | 237912114 | protein_coding | 114,53 | 0 |
| ENSG0000157800 | SLC37A3    | 7  | 140293693 | 140404433 | protein_coding | 114,48 | 0 |
| ENSG0000087085 | ACHE       | 7  | 100889994 | 100896974 | protein_coding | 114,29 | 0 |
| ENSG0000100379 | KCTD17     | 22 | 37051736  | 37063390  | protein_coding | 114,29 | 0 |
| ENSG0000174282 | ZBTB4      | 17 | 7459366   | 7484263   | protein_coding | 114,21 | 0 |
| ENSG0000198315 | ZKSCAN8    | 6  | 28141910  | 28159472  | protein_coding | 114,19 | 0 |
| ENSG0000108797 | CNTNAP1    | 17 | 42682613  | 42699814  | protein_coding | 114,10 | 0 |
| ENSG0000159788 | RGS12      | 4  | 3293028   | 3439913   | protein_coding | 113,80 | 0 |
| ENSG0000173930 | SLCO4C1    | 5  | 102233986 | 102296549 | protein_coding | 113,80 | 0 |
| ENSG0000168040 | FADD       | 11 | 70203163  | 70207390  | protein_coding | 113,66 | 0 |
| ENSG0000137700 | SLC37A4    | 11 | 119024114 | 119030906 | protein_coding | 113,58 | 0 |
| ENSG0000185522 | LMNTD2     | 11 | 554855    | 560779    | protein_coding | 113,42 | 0 |
| ENSG0000171033 | PKIA       | 8  | 78516139  | 78605267  | protein_coding | 113,36 | 0 |
| ENSG0000235961 | PNMA6A     | X  | 153072482 | 153075018 | protein_coding | 113,20 | 0 |
| ENSG0000172086 | KRCC1      | 2  | 88027205  | 88055729  | protein_coding | 113,09 | 0 |
| ENSG0000134955 | SLC37A2    | 11 | 125063067 | 125090312 | protein_coding | 112,90 | 0 |
| ENSG0000188747 | NOXA1      | 9  | 137423350 | 137434406 | protein_coding | 112,77 | 0 |
| ENSG0000125458 | NT5C       | 17 | 75130225  | 75131795  | protein_coding | 112,76 | 0 |
| ENSG0000179583 | CIITA      | 16 | 10877198  | 10932281  | protein_coding | 112,65 | 0 |
| ENSG0000144792 | ZNF660     | 3  | 44578223  | 44599694  | protein_coding | 112,58 | 0 |

|                 |          |    |           |           |                |        |   |
|-----------------|----------|----|-----------|-----------|----------------|--------|---|
| ENSG00000167536 | DHRS13   | 17 | 28897781  | 28903071  | protein_coding | 112,50 | 0 |
| ENSG00000075223 | SEMA3C   | 7  | 80742538  | 80922359  | protein_coding | 112,36 | 0 |
| ENSG00000149761 | NUDT22   | 11 | 64225941  | 64230686  | protein_coding | 112,34 | 0 |
| ENSG00000175970 | UNC119B  | 12 | 120710435 | 120723640 | protein_coding | 112,23 | 0 |
| ENSG00000067992 | PDK3     | X  | 24465221  | 24539837  | protein_coding | 112,21 | 0 |
| ENSG00000165259 | HDX      | X  | 84317874  | 84502479  | protein_coding | 112,20 | 0 |
| ENSG00000133138 | TBC1D8B  | X  | 106802680 | 106876145 | protein_coding | 112,19 | 0 |
| ENSG00000164488 | DACT2    | 6  | 168292830 | 168319754 | protein_coding | 112,10 | 0 |
| ENSG00000219607 | PPP1R3G  | 6  | 5084581   | 5089487   | protein_coding | 112,10 | 0 |
| ENSG00000205213 | LGR4     | 11 | 27365961  | 27472775  | protein_coding | 111,80 | 0 |
| ENSG00000071282 | LMCD1    | 3  | 8501707   | 8574673   | protein_coding | 111,78 | 0 |
| ENSG00000143401 | ANP32E   | 1  | 150218417 | 150236156 | protein_coding | 111,70 | 0 |
| ENSG00000099785 | 02-mars  | 19 | 8413270   | 8439017   | protein_coding | 111,66 | 0 |
| ENSG00000124731 | TREM1    | 6  | 41267926  | 41286719  | protein_coding | 111,50 | 0 |
| ENSG00000187608 | ISG15    | 1  | 1001138   | 1014541   | protein_coding | 111,36 | 0 |
| ENSG00000106266 | SNX8     | 7  | 2251770   | 2354318   | protein_coding | 111,33 | 0 |
| ENSG00000154065 | ANKRD29  | 18 | 23598926  | 23662885  | protein_coding | 111,27 | 0 |
| ENSG00000187066 | TMEM262  | 11 | 65084979  | 65089375  | protein_coding | 111,20 | 0 |
| ENSG00000106261 | ZKSCAN1  | 7  | 100015572 | 100041689 | protein_coding | 111,15 | 0 |
| ENSG00000160305 | DIP2A    | 21 | 46458899  | 46569852  | protein_coding | 111,10 | 0 |
| ENSG00000185634 | SHC4     | 15 | 48823735  | 48963444  | protein_coding | 111,03 | 0 |
| ENSG00000165655 | ZNF503   | 10 | 75397830  | 75401906  | protein_coding | 110,64 | 0 |
| ENSG00000102096 | PIM2     | X  | 48913182  | 48919024  | protein_coding | 110,45 | 0 |
| ENSG00000104866 | PPP1R37  | 19 | 45091396  | 45148077  | protein_coding | 110,03 | 0 |
| ENSG00000149179 | C11orf49 | 11 | 46936689  | 47164385  | protein_coding | 110,00 | 0 |
| ENSG00000124588 | NQO2     | 6  | 2987987   | 3028869   | protein_coding | 109,93 | 0 |
| ENSG00000181619 | GPR135   | 14 | 59429022  | 59465342  | protein_coding | 109,88 | 0 |
| ENSG00000125753 | VASP     | 19 | 45506579  | 45526983  | protein_coding | 109,80 | 0 |
| ENSG00000159314 | ARHGAP27 | 17 | 45393902  | 45434421  | protein_coding | 109,80 | 0 |
| ENSG00000204469 | PRRC2A   | 6  | 31620720  | 31637771  | protein_coding | 109,79 | 0 |
| ENSG00000204316 | MRPL38   | 17 | 75898643  | 75905413  | protein_coding | 109,60 | 0 |
| ENSG00000164574 | GALNT10  | 5  | 154190730 | 154420984 | protein_coding | 109,58 | 0 |
| ENSG00000168615 | ADAM9    | 8  | 38996869  | 39105144  | protein_coding | 109,57 | 0 |
| ENSG00000157625 | TAB3     | X  | 30827442  | 30975084  | protein_coding | 109,56 | 0 |
| ENSG00000063180 | CA11     | 19 | 48637942  | 48646312  | protein_coding | 109,30 | 0 |
| ENSG00000023892 | DEF6     | 6  | 35297852  | 35321771  | protein_coding | 109,20 | 0 |
| ENSG00000117411 | B4GALT2  | 1  | 43978943  | 43991170  | protein_coding | 108,98 | 0 |
| ENSG00000174080 | CTSF     | 11 | 66563463  | 66568841  | protein_coding | 108,96 | 0 |
| ENSG00000213523 | SRA1     | 5  | 140537340 | 140558310 | protein_coding | 108,87 | 0 |
| ENSG00000092841 | MYL6     | 12 | 56158161  | 56163496  | protein_coding | 108,78 | 0 |
| ENSG00000112320 | SOBP     | 6  | 107489958 | 107660167 | protein_coding | 108,61 | 0 |
| ENSG00000117394 | SLC2A1   | 1  | 42925375  | 42959173  | protein_coding | 108,47 | 0 |
| ENSG00000234224 | TMEM229A | 7  | 124030916 | 124033023 | protein_coding | 108,40 | 0 |
| ENSG00000205356 | TECPR1   | 7  | 98214624  | 98252251  | protein_coding | 108,14 | 0 |
| ENSG00000164512 | ANKRD55  | 5  | 56099678  | 56233359  | protein_coding | 108,10 | 0 |
| ENSG00000164124 | TMEM144  | 4  | 158201604 | 158255411 | protein_coding | 108,00 | 0 |
| ENSG00000172476 | RAB40A   | X  | 103499750 | 103519489 | protein_coding | 108,00 | 0 |
| ENSG00000179820 | MYADM    | 19 | 53866223  | 53876437  | protein_coding | 107,79 | 0 |
| ENSG00000104835 | SARS2    | 19 | 38915266  | 38930896  | protein_coding | 107,70 | 0 |
| ENSG00000197114 | ZGPAT    | 20 | 63707465  | 63736142  | protein_coding | 107,28 | 0 |
| ENSG00000105967 | TFEC     | 7  | 115935148 | 116159896 | protein_coding | 107,10 | 0 |
| ENSG00000165029 | ABCA1    | 9  | 104781002 | 104928237 | protein_coding | 106,89 | 0 |
| ENSG00000088756 | ARHGAP28 | 18 | 6729718   | 6915716   | protein_coding | 106,50 | 0 |
| ENSG00000184937 | WT1      | 11 | 32387775  | 32435630  | protein_coding | 106,30 | 0 |
| ENSG00000080819 | CPOX     | 3  | 98521132  | 98593723  | protein_coding | 106,24 | 0 |
| ENSG00000146063 | TRIM41   | 5  | 181222499 | 181235809 | protein_coding | 106,11 | 0 |
| ENSG00000183762 | KREMEN1  | 22 | 29073078  | 29168333  | protein_coding | 105,95 | 0 |
| ENSG00000174669 | SLC29A2  | 11 | 66362521  | 66372214  | protein_coding | 105,95 | 0 |

|                 |            |    |           |           |                |        |   |
|-----------------|------------|----|-----------|-----------|----------------|--------|---|
| ENSG00000162066 | AMDHD2     | 16 | 2520357   | 2531422   | protein_coding | 105,94 | 0 |
| ENSG00000130158 | DOCK6      | 19 | 11199295  | 11262481  | protein_coding | 105,78 | 0 |
| ENSG00000151917 | BEND6      | 6  | 56955126  | 57027342  | protein_coding | 105,59 | 0 |
| ENSG00000187266 | EPOR       | 19 | 11377205  | 11384342  | protein_coding | 105,54 | 0 |
| ENSG00000056998 | GYG2       | X  | 2828788   | 2882818   | protein_coding | 105,51 | 0 |
| ENSG00000120327 | PCDHB14    | 5  | 141222932 | 141227759 | protein_coding | 105,50 | 0 |
| ENSG00000066294 | CD84       | 1  | 160541095 | 160579516 | protein_coding | 105,40 | 0 |
| ENSG00000166165 | CKB        | 14 | 103519659 | 103523111 | protein_coding | 105,30 | 0 |
| ENSG00000185274 | WBSCR17    | 7  | 71132169  | 71713600  | protein_coding | 105,10 | 0 |
| ENSG00000135318 | NT5E       | 6  | 85449584  | 85495791  | protein_coding | 105,00 | 0 |
| ENSG00000165895 | ARHGAP42   | 11 | 100687653 | 100991937 | protein_coding | 104,92 | 0 |
| ENSG00000197779 | ZNF81      | X  | 47836902  | 48002561  | protein_coding | 104,92 | 0 |
| ENSG00000136859 | ANGPTL2    | 9  | 127087332 | 127122883 | protein_coding | 104,90 | 0 |
| ENSG00000137760 | ALKBH8     | 11 | 107502726 | 107565746 | protein_coding | 104,86 | 0 |
| ENSG00000198185 | ZNF334     | 20 | 46499630  | 46513559  | protein_coding | 104,78 | 0 |
| ENSG00000165025 | SYK        | 9  | 90801787  | 90898549  | protein_coding | 104,38 | 0 |
| ENSG00000169926 | KLF13      | 15 | 31326855  | 31435665  | protein_coding | 104,20 | 0 |
| ENSG00000141506 | PIK3R5     | 17 | 8878911   | 8965712   | protein_coding | 104,18 | 0 |
| ENSG00000083844 | ZNF264     | 19 | 57191500  | 57222846  | protein_coding | 104,03 | 0 |
| ENSG00000253250 | C8orf88    | 8  | 90958637  | 90985257  | protein_coding | 103,90 | 0 |
| ENSG00000262246 | CORO7      | 16 | 4354542   | 4425705   | protein_coding | 103,73 | 0 |
| ENSG00000065268 | WDR18      | 19 | 984271    | 998438    | protein_coding | 103,55 | 0 |
| ENSG00000204356 | NELFE      | 6  | 31952087  | 31959110  | protein_coding | 103,36 | 0 |
| ENSG00000167524 | ENSG000000 | 17 | 28607964  | 28614200  | protein_coding | 103,18 | 0 |
| ENSG00000112559 | MDFI       | 6  | 41636882  | 41654246  | protein_coding | 102,90 | 0 |
| ENSG00000171408 | PDE7B      | 6  | 135851696 | 136195574 | protein_coding | 102,89 | 0 |
| ENSG00000105968 | H2AFV      | 7  | 44826791  | 44848083  | protein_coding | 102,85 | 0 |
| ENSG00000254122 | PCDHGB7    | 5  | 141417645 | 141512979 | protein_coding | 102,80 | 0 |
| ENSG00000141744 | PNMT       | 17 | 39667981  | 39670475  | protein_coding | 102,77 | 0 |
| ENSG00000108691 | CCL2       | 17 | 34255218  | 34257203  | protein_coding | 102,60 | 0 |
| ENSG00000174327 | SLC16A13   | 17 | 7036075   | 7040121   | protein_coding | 102,55 | 0 |
| ENSG00000179526 | SHARPIN    | 8  | 144098633 | 144108124 | protein_coding | 102,32 | 0 |
| ENSG00000143546 | S100A8     | 1  | 153390032 | 153391188 | protein_coding | 102,10 | 0 |
| ENSG00000131015 | ULBP2      | 6  | 149942000 | 149949235 | protein_coding | 101,90 | 0 |
| ENSG00000167302 | ENTHD2     | 17 | 81228277  | 81239091  | protein_coding | 101,88 | 0 |
| ENSG00000069424 | KCNAB2     | 1  | 5991466   | 6101193   | protein_coding | 101,84 | 0 |
| ENSG00000025770 | NCAPH2     | 22 | 50508216  | 50523472  | protein_coding | 101,55 | 0 |
| ENSG00000180011 | ZADH2      | 18 | 75195108  | 75209348  | protein_coding | 101,51 | 0 |
| ENSG00000011021 | CLCN6      | 1  | 11806096  | 11843144  | protein_coding | 101,51 | 0 |
| ENSG00000126368 | NR1D1      | 17 | 40092787  | 40100725  | protein_coding | 101,16 | 0 |
| ENSG00000213689 | TREX1      | 3  | 48465811  | 48467645  | protein_coding | 101,10 | 0 |
| ENSG00000164161 | HHIP       | 4  | 144646021 | 144745271 | protein_coding | 101,00 | 0 |
| ENSG00000156675 | RAB11FIP1  | 8  | 37858618  | 37899467  | protein_coding | 100,88 | 0 |
| ENSG00000227057 | WDR46      | 6  | 33279108  | 33289527  | protein_coding | 100,88 | 0 |
| ENSG00000197696 | NMB        | 15 | 84655129  | 84658563  | protein_coding | 100,64 | 0 |
| ENSG00000116406 | EDEM3      | 1  | 184690231 | 184754913 | protein_coding | 100,26 | 0 |
| ENSG00000267534 | S1PR2      | 19 | 10221435  | 10231272  | protein_coding | 100,17 | 0 |
| ENSG00000141543 | EIF4A3     | 17 | 80135214  | 80147183  | protein_coding | 100,11 | 0 |
| ENSG00000175573 | C11orf68   | 11 | 65916808  | 65919117  | protein_coding | 100,07 | 0 |
| ENSG00000242028 | HYPK       | 15 | 43796142  | 43803043  | protein_coding | 100,00 | 0 |
| ENSG00000135829 | DHX9       | 1  | 182839369 | 182887751 | protein_coding | 99,75  | 0 |
| ENSG00000076604 | TRAF4      | 17 | 28743984  | 28750958  | protein_coding | 99,74  | 0 |
| ENSG00000101935 | AMMECR1    | X  | 110194186 | 110440233 | protein_coding | 99,58  | 0 |
| ENSG00000089692 | LAG3       | 12 | 6772512   | 6778455   | protein_coding | 99,50  | 0 |
| ENSG00000181873 | IBA57      | 1  | 228165815 | 228182257 | protein_coding | 99,43  | 0 |
| ENSG00000256574 | OR13A1     | 10 | 45302654  | 45315608  | protein_coding | 99,20  | 0 |
| ENSG00000176853 | FAM91A1    | 8  | 123768456 | 123815452 | protein_coding | 99,16  | 0 |
| ENSG00000173546 | CSPG4      | 15 | 75674322  | 75712848  | protein_coding | 99,00  | 0 |

|                 |          |    |           |           |                |       |   |
|-----------------|----------|----|-----------|-----------|----------------|-------|---|
| ENSG00000213903 | LTB4R    | 14 | 24311450  | 24318036  | protein_coding | 98,91 | 0 |
| ENSG00000145217 | SLC26A1  | 4  | 979073    | 993440    | protein_coding | 98,91 | 0 |
| ENSG00000168268 | NT5DC2   | 3  | 52524385  | 52535054  | protein_coding | 98,89 | 0 |
| ENSG00000154269 | ENPP3    | 6  | 131628442 | 131747418 | protein_coding | 98,75 | 0 |
| ENSG00000188153 | COL4A5   | X  | 108439844 | 108697545 | protein_coding | 98,70 | 0 |
| ENSG00000160293 | VAV2     | 9  | 133761894 | 133992604 | protein_coding | 98,64 | 0 |
| ENSG00000159784 | FAM131B  | 7  | 143353400 | 143362770 | protein_coding | 98,60 | 0 |
| ENSG00000157600 | TMEM164  | X  | 110002631 | 110182734 | protein_coding | 98,47 | 0 |
| ENSG00000147853 | AK3      | 9  | 4709559   | 4742043   | protein_coding | 98,46 | 0 |
| ENSG00000131899 | LLGL1    | 17 | 18225587  | 18244875  | protein_coding | 98,44 | 0 |
| ENSG00000205517 | RGL3     | 19 | 11384341  | 11419342  | protein_coding | 98,43 | 0 |
| ENSG00000085514 | PILRA    | 7  | 100367530 | 100400099 | protein_coding | 98,40 | 0 |
| ENSG00000128311 | TST      | 22 | 37010859  | 37020183  | protein_coding | 98,28 | 0 |
| ENSG00000205220 | PSMB10   | 16 | 67934502  | 67937087  | protein_coding | 98,07 | 0 |
| ENSG00000180035 | ZNF48    | 16 | 30378106  | 30400108  | protein_coding | 97,97 | 0 |
| ENSG00000079335 | CDC14A   | 1  | 100345025 | 100520277 | protein_coding | 97,55 | 0 |
| ENSG00000188419 | CHM      | X  | 85861180  | 86047562  | protein_coding | 97,41 | 0 |
| ENSG00000157399 | ARSE     | X  | 2934632   | 2968310   | protein_coding | 97,40 | 0 |
| ENSG00000100226 | GTPBP1   | 22 | 38705723  | 38738299  | protein_coding | 97,32 | 0 |
| ENSG00000132639 | SNAP25   | 20 | 10218830  | 10307418  | protein_coding | 97,30 | 0 |
| ENSG00000204219 | TCEA3    | 1  | 23381061  | 23424740  | protein_coding | 97,27 | 0 |
| ENSG00000171860 | C3AR1    | 12 | 8058302   | 8066471   | protein_coding | 97,20 | 0 |
| ENSG00000185338 | SOCS1    | 16 | 11254405  | 11256179  | protein_coding | 97,12 | 0 |
| ENSG00000184840 | TMED9    | 5  | 177592158 | 177596124 | protein_coding | 97,06 | 0 |
| ENSG00000131116 | ZNF428   | 19 | 43607219  | 43619874  | protein_coding | 97,03 | 0 |
| ENSG00000167074 | TEF      | 22 | 41367333  | 41399326  | protein_coding | 96,94 | 0 |
| ENSG00000172985 | SH3RF3   | 2  | 109129348 | 109504632 | protein_coding | 96,90 | 0 |
| ENSG00000196275 | GTF2IRD2 | 7  | 74796144  | 74851551  | protein_coding | 96,82 | 0 |
| ENSG00000212123 | PRR22    | 19 | 5782960   | 5784765   | protein_coding | 96,70 | 0 |
| ENSG00000106665 | CLIP2    | 7  | 74289475  | 74405943  | protein_coding | 96,70 | 0 |
| ENSG00000100219 | XBP1     | 22 | 28794555  | 28800597  | protein_coding | 96,58 | 0 |
| ENSG00000154640 | BTG3     | 21 | 17593653  | 17612947  | protein_coding | 96,45 | 0 |
| ENSG00000179403 | VWA1     | 1  | 1434861   | 1442882   | protein_coding | 96,40 | 0 |
| ENSG00000159840 | ZYX      | 7  | 143381080 | 143391111 | protein_coding | 96,31 | 0 |
| ENSG00000186407 | CD300E   | 17 | 74609887  | 74623738  | protein_coding | 96,30 | 0 |
| ENSG00000246705 | H2AFJ    | 12 | 14774383  | 14778002  | protein_coding | 96,29 | 0 |
| ENSG00000269858 | EGLN2    | 19 | 40798996  | 40808433  | protein_coding | 96,27 | 0 |
| ENSG00000162783 | IER5     | 1  | 181088712 | 181092899 | protein_coding | 96,25 | 0 |
| ENSG00000121316 | PLBD1    | 12 | 14503661  | 14568349  | protein_coding | 96,07 | 0 |
| ENSG00000148843 | PDCD11   | 10 | 103396648 | 103446292 | protein_coding | 96,06 | 0 |
| ENSG00000273604 | C17orf96 | 17 | 38671703  | 38675421  | protein_coding | 96,04 | 0 |
| ENSG00000106348 | IMPDH1   | 7  | 128392277 | 128410252 | protein_coding | 95,91 | 0 |
| ENSG00000221843 | C2orf16  | 2  | 27576522  | 27582720  | protein_coding | 95,91 | 0 |
| ENSG00000114650 | SCAP     | 3  | 47413694  | 47477126  | protein_coding | 95,88 | 0 |
| ENSG00000154511 | FAM69A   | 1  | 92832737  | 92961522  | protein_coding | 95,88 | 0 |
| ENSG00000135596 | MICAL1   | 6  | 109444062 | 109465968 | protein_coding | 95,77 | 0 |
| ENSG00000103569 | AQP9     | 15 | 58138169  | 58185911  | protein_coding | 95,75 | 0 |
| ENSG00000115956 | PLEK     | 2  | 68365173  | 68397453  | protein_coding | 95,75 | 0 |
| ENSG00000114988 | LMAN2L   | 2  | 96705929  | 96740064  | protein_coding | 95,69 | 0 |
| ENSG00000123104 | ITPR2    | 12 | 26336515  | 26833198  | protein_coding | 95,68 | 0 |
| ENSG00000137098 | SPAG8    | 9  | 35808045  | 35812272  | protein_coding | 95,60 | 0 |
| ENSG00000143416 | SELENBP1 | 1  | 151364302 | 151372733 | protein_coding | 95,50 | 0 |
| ENSG00000126456 | IRF3     | 19 | 49659569  | 49665875  | protein_coding | 95,20 | 0 |
| ENSG00000179813 | FAM216B  | 13 | 42781550  | 42791549  | protein_coding | 95,20 | 0 |
| ENSG00000175040 | CHST2    | 3  | 143119331 | 143124014 | protein_coding | 95,10 | 0 |
| ENSG00000162341 | TPCN2    | 11 | 69048897  | 69090604  | protein_coding | 95,09 | 0 |
| ENSG00000175505 | CLCF1    | 11 | 67364168  | 67374177  | protein_coding | 95,05 | 0 |
| ENSG00000198189 | HSD17B11 | 4  | 87336610  | 87391386  | protein_coding | 94,98 | 0 |

|                 |          |    |           |           |                |       |   |
|-----------------|----------|----|-----------|-----------|----------------|-------|---|
| ENSG00000154358 | OBSCN    | 1  | 228208130 | 228378876 | protein_coding | 94,88 | 0 |
| ENSG00000224051 | CPTP     | 1  | 1324756   | 1328897   | protein_coding | 94,76 | 0 |
| ENSG00000103966 | EHD4     | 15 | 41895939  | 41972578  | protein_coding | 94,72 | 0 |
| ENSG00000185862 | EVI2B    | 17 | 31303766  | 31314112  | protein_coding | 94,70 | 0 |
| ENSG00000170145 | SIK2     | 11 | 111602391 | 111730853 | protein_coding | 94,66 | 0 |
| ENSG00000203896 | LIME1    | 20 | 63736283  | 63739103  | protein_coding | 94,30 | 0 |
| ENSG00000162426 | SLC45A1  | 1  | 8317826   | 8344167   | protein_coding | 94,09 | 0 |
| ENSG00000196371 | FUT4     | 11 | 94543840  | 94549898  | protein_coding | 94,02 | 0 |
| ENSG00000117385 | P3H1     | 1  | 42746335  | 42767084  | protein_coding | 93,91 | 0 |
| ENSG00000173210 | ABLIM3   | 5  | 149141483 | 149260542 | protein_coding | 93,90 | 0 |
| ENSG00000135144 | DTX1     | 12 | 113056709 | 113098028 | protein_coding | 93,90 | 0 |
| ENSG00000165966 | PDZRN4   | 12 | 41188448  | 41574590  | protein_coding | 93,90 | 0 |
| ENSG00000124608 | AARS2    | 6  | 44299654  | 44313326  | protein_coding | 93,90 | 0 |
| ENSG00000213676 | ATF6B    | 6  | 32098176  | 32128253  | protein_coding | 93,84 | 0 |
| ENSG00000160593 | AMICA1   | 11 | 118193740 | 118225094 | protein_coding | 93,80 | 0 |
| ENSG00000104852 | SNRNP70  | 19 | 49085419  | 49108605  | protein_coding | 93,66 | 0 |
| ENSG00000155265 | GOLGA7B  | 10 | 97850239  | 97871580  | protein_coding | 93,62 | 0 |
| ENSG00000182919 | C11orf54 | 11 | 93741591  | 93764749  | protein_coding | 93,60 | 0 |
| ENSG00000104938 | CLEC4M   | 19 | 7763149   | 7769605   | protein_coding | 93,50 | 0 |
| ENSG00000125967 | NECAB3   | 20 | 33657087  | 33674463  | protein_coding | 93,48 | 0 |
| ENSG00000095587 | TLL2     | 10 | 96364606  | 96513918  | protein_coding | 93,40 | 0 |
| ENSG00000135587 | SMPD2    | 6  | 109440763 | 109443919 | protein_coding | 93,33 | 0 |
| ENSG00000106780 | MEGF9    | 9  | 120600813 | 120714470 | protein_coding | 93,33 | 0 |
| ENSG00000168026 | TTC21A   | 3  | 39107704  | 39138903  | protein_coding | 93,20 | 0 |
| ENSG00000168306 | ACOX2    | 3  | 58505136  | 58537319  | protein_coding | 93,10 | 0 |
| ENSG00000079257 | LXN      | 3  | 158645822 | 158672693 | protein_coding | 93,03 | 0 |
| ENSG00000161544 | CYGB     | 17 | 76527356  | 76551175  | protein_coding | 93,00 | 0 |
| ENSG00000213782 | DDX47    | 12 | 12813316  | 12829981  | protein_coding | 92,90 | 0 |
| ENSG00000185238 | PRMT3    | 11 | 20387530  | 20509294  | protein_coding | 92,76 | 0 |
| ENSG00000137275 | RIPK1    | 6  | 3063991   | 3115187   | protein_coding | 92,70 | 0 |
| ENSG00000164307 | ERAP1    | 5  | 96760810  | 96808100  | protein_coding | 92,62 | 0 |
| ENSG00000149451 | ADAM33   | 20 | 3667965   | 3682246   | protein_coding | 92,60 | 0 |
| ENSG00000158122 | AAED1    | 9  | 96639577  | 96655303  | protein_coding | 92,52 | 0 |
| ENSG00000134762 | DSC3     | 18 | 30990008  | 31042815  | protein_coding | 92,50 | 0 |
| ENSG00000246922 | UBAP1L   | 15 | 65092770  | 65115197  | protein_coding | 92,43 | 0 |
| ENSG00000145198 | VWA5B2   | 3  | 184230429 | 184242329 | protein_coding | 92,40 | 0 |
| ENSG00000148386 | LCN9     | 9  | 135663322 | 135666422 | protein_coding | 92,29 | 0 |
| ENSG00000169372 | CRADD    | 12 | 93677375  | 93894840  | protein_coding | 92,26 | 0 |
| ENSG00000185359 | HGS      | 17 | 81683326  | 81703138  | protein_coding | 92,25 | 0 |
| ENSG00000143067 | ZNF697   | 1  | 119619422 | 119647773 | protein_coding | 92,24 | 0 |
| ENSG00000198026 | ZNF335   | 20 | 45948653  | 45972172  | protein_coding | 92,21 | 0 |
| ENSG00000196547 | MAN2A2   | 15 | 90902218  | 90922584  | protein_coding | 92,03 | 0 |
| ENSG00000244165 | P2RY11   | 19 | 10111538  | 10115372  | protein_coding | 91,93 | 0 |
| ENSG00000159216 | RUNX1    | 21 | 34787801  | 36004667  | protein_coding | 91,83 | 0 |
| ENSG00000117139 | KDM5B    | 1  | 202724491 | 202809470 | protein_coding | 91,81 | 0 |
| ENSG00000171051 | FPR1     | 19 | 51745172  | 51804110  | protein_coding | 91,80 | 0 |
| ENSG00000039650 | PNKP     | 19 | 49861204  | 49878351  | protein_coding | 91,80 | 0 |
| ENSG00000162688 | AGL      | 1  | 99850084  | 99924023  | protein_coding | 91,75 | 0 |
| ENSG00000160055 | TMEM234  | 1  | 32214472  | 32222359  | protein_coding | 91,74 | 0 |
| ENSG00000138744 | NAAA     | 4  | 75913657  | 75941051  | protein_coding | 91,70 | 0 |
| ENSG00000241852 | C8orf58  | 8  | 22599601  | 22604150  | protein_coding | 91,57 | 0 |
| ENSG00000100867 | DHRS2    | 14 | 23630115  | 23645639  | protein_coding | 91,50 | 0 |
| ENSG00000171298 | GAA      | 17 | 80101556  | 80119879  | protein_coding | 91,47 | 0 |
| ENSG00000126705 | AHDC1    | 1  | 27534035  | 27604431  | protein_coding | 91,45 | 0 |
| ENSG00000099365 | STX1B    | 16 | 30989256  | 31010628  | protein_coding | 91,30 | 0 |
| ENSG00000196189 | SEMA4A   | 1  | 156147366 | 156177752 | protein_coding | 91,20 | 0 |
| ENSG00000110921 | MVK      | 12 | 109573255 | 109598117 | protein_coding | 91,01 | 0 |
| ENSG00000135722 | FBXL8    | 16 | 67159931  | 67164570  | protein_coding | 91,00 | 0 |

|                 |         |    |           |           |                |       |   |
|-----------------|---------|----|-----------|-----------|----------------|-------|---|
| ENSG00000166794 | PPIB    | 15 | 64155812  | 64163205  | protein_coding | 90,89 | 0 |
| ENSG00000204227 | RING1   | 6  | 33208495  | 33212722  | protein_coding | 90,85 | 0 |
| ENSG00000102802 | MEDAG   | 13 | 30906191  | 30925572  | protein_coding | 90,70 | 0 |
| ENSG00000132155 | RAF1    | 3  | 12583601  | 12664226  | protein_coding | 90,54 | 0 |
| ENSG00000198075 | SULT1C4 | 2  | 108377911 | 108388057 | protein_coding | 90,30 | 0 |
| ENSG00000122971 | ACADS   | 12 | 120725735 | 120740008 | protein_coding | 90,26 | 0 |
| ENSG00000188916 | FAM196A | 10 | 127135426 | 127196158 | protein_coding | 90,24 | 0 |
| ENSG00000100221 | JOSD1   | 22 | 38685543  | 38701556  | protein_coding | 90,23 | 0 |
| ENSG00000135447 | PPP1R1A | 12 | 54575387  | 54588659  | protein_coding | 90,20 | 0 |
| ENSG00000184378 | ACTRT3  | 3  | 169766921 | 169769895 | protein_coding | 90,20 | 0 |
| ENSG00000101336 | HCK     | 20 | 32052188  | 32101856  | protein_coding | 90,18 | 0 |
| ENSG00000121064 | SCPEP1  | 17 | 56978105  | 57006768  | protein_coding | 90,14 | 0 |
| ENSG00000189007 | ADAT2   | 6  | 143422832 | 143450673 | protein_coding | 90,08 | 0 |
| ENSG0000010361  | FUZ     | 19 | 49806869  | 49817376  | protein_coding | 90,04 | 0 |
| ENSG00000066336 | SPI1    | 11 | 47354860  | 47378576  | protein_coding | 90,00 | 0 |
| ENSG00000112234 | FBXL4   | 6  | 98868538  | 98948006  | protein_coding | 89,91 | 0 |
| ENSG00000170525 | PFKFB3  | 10 | 6144934   | 6235545   | protein_coding | 89,91 | 0 |
| ENSG00000140057 | AK7     | 14 | 96392111  | 96489427  | protein_coding | 89,90 | 0 |
| ENSG00000223501 | VPS52   | 6  | 33250272  | 33272047  | protein_coding | 89,78 | 0 |
| ENSG00000174343 | CHRNA9  | 4  | 40335329  | 40355217  | protein_coding | 89,70 | 0 |
| ENSG00000162630 | B3GALT2 | 1  | 193179045 | 193186654 | protein_coding | 89,70 | 0 |
| ENSG00000225663 | FAM195B | 17 | 81822361  | 81833302  | protein_coding | 89,57 | 0 |
| ENSG00000166073 | GPR176  | 15 | 39799023  | 39920892  | protein_coding | 89,52 | 0 |
| ENSG00000204152 | TIMM23B | 10 | 49942033  | 49974850  | protein_coding | 89,40 | 0 |
| ENSG00000204304 | PBX2    | 6  | 32184741  | 32190186  | protein_coding | 89,35 | 0 |
| ENSG00000105223 | PLD3    | 19 | 40348456  | 40380439  | protein_coding | 89,32 | 0 |
| ENSG00000162512 | SDC3    | 1  | 30869467  | 30908761  | protein_coding | 89,28 | 0 |
| ENSG00000143570 | SLC39A1 | 1  | 153959099 | 153968184 | protein_coding | 89,14 | 0 |
| ENSG00000100985 | MMP9    | 20 | 46008908  | 46016561  | protein_coding | 89,10 | 0 |
| ENSG00000154222 | CC2D1B  | 1  | 52345723  | 52366193  | protein_coding | 89,05 | 0 |
| ENSG00000153406 | NMRAL1  | 16 | 4461680   | 4495763   | protein_coding | 89,03 | 0 |
| ENSG00000166979 | EVA1C   | 21 | 32412006  | 32515397  | protein_coding | 89,00 | 0 |
| ENSG00000196730 | DAPK1   | 9  | 87497228  | 87708633  | protein_coding | 88,97 | 0 |
| ENSG00000115419 | GLS     | 2  | 190880827 | 190965552 | protein_coding | 88,93 | 0 |
| ENSG00000124541 | RRP36   | 6  | 43021645  | 43034156  | protein_coding | 88,91 | 0 |
| ENSG00000175274 | TP53I11 | 11 | 44885903  | 44951306  | protein_coding | 88,91 | 0 |
| ENSG00000001036 | FUCA2   | 6  | 143494811 | 143511690 | protein_coding | 88,88 | 0 |
| ENSG00000151929 | BAG3    | 10 | 119651370 | 119677819 | protein_coding | 88,85 | 0 |
| ENSG00000182685 | BRICD5  | 16 | 2209253   | 2211950   | protein_coding | 88,81 | 0 |
| ENSG00000149150 | SLC43A1 | 11 | 57484534  | 57515786  | protein_coding | 88,80 | 0 |
| ENSG00000104695 | PPP2CB  | 8  | 30774457  | 30814314  | protein_coding | 88,77 | 0 |
| ENSG00000182979 | MTA1    | 14 | 105419820 | 105470729 | protein_coding | 88,67 | 0 |
| ENSG00000167671 | UBXN6   | 19 | 4444999   | 4457822   | protein_coding | 88,64 | 0 |
| ENSG00000119431 | HDHD3   | 9  | 113373419 | 113376999 | protein_coding | 88,63 | 0 |
| ENSG00000148671 | ADIRF   | 10 | 86968192  | 86983934  | protein_coding | 88,60 | 0 |
| ENSG00000105519 | CAPS    | 19 | 5911707   | 5916208   | protein_coding | 88,57 | 0 |
| ENSG00000169508 | GPR183  | 13 | 99294530  | 99307405  | protein_coding | 88,55 | 0 |
| ENSG00000068028 | RASSF1  | 3  | 50329782  | 50340980  | protein_coding | 88,43 | 0 |
| ENSG00000198353 | HOXC4   | 12 | 54016931  | 54056030  | protein_coding | 88,40 | 0 |
| ENSG00000114439 | BBX     | 3  | 107522936 | 107811324 | protein_coding | 88,37 | 0 |
| ENSG00000095906 | NUBP2   | 16 | 1782901   | 1789191   | protein_coding | 88,36 | 0 |
| ENSG0000019485  | PRDM11  | 11 | 45095806  | 45235124  | protein_coding | 88,33 | 0 |
| ENSG00000131711 | MAP1B   | 5  | 72107234  | 72209570  | protein_coding | 88,28 | 0 |
| ENSG00000111052 | LIN7A   | 12 | 80792520  | 80937925  | protein_coding | 88,26 | 0 |
| ENSG00000101365 | IDH3B   | 20 | 2658395   | 2664219   | protein_coding | 88,22 | 0 |
| ENSG00000173918 | C1QTNF1 | 17 | 79022814  | 79049788  | protein_coding | 88,12 | 0 |
| ENSG00000180730 | SHISA2  | 13 | 26044597  | 26051031  | protein_coding | 88,10 | 0 |
| ENSG00000159228 | CBR1    | 21 | 36069941  | 36073166  | protein_coding | 88,07 | 0 |

|                 |                 |    |           |           |                |       |   |
|-----------------|-----------------|----|-----------|-----------|----------------|-------|---|
| ENSG00000177885 | GRB2            | 17 | 75318076  | 75405709  | protein_coding | 87,95 | 0 |
| ENSG00000169314 | C22orf15        | 22 | 23763021  | 23765861  | protein_coding | 87,90 | 0 |
| ENSG00000171291 | ZNF439          | 19 | 11848726  | 11883750  | protein_coding | 87,79 | 0 |
| ENSG00000205923 | CEMP1           | 16 | 2530035   | 2531417   | protein_coding | 87,78 | 0 |
| ENSG00000146216 | TTBK1           | 6  | 43243680  | 43288259  | protein_coding | 87,70 | 0 |
| ENSG00000136689 | IL1RN           | 2  | 113107214 | 113134016 | protein_coding | 87,70 | 0 |
| ENSG00000104880 | ARHGEF18        | 19 | 7395113   | 7472477   | protein_coding | 87,60 | 0 |
| ENSG00000104689 | TNFRSF10A       | 8  | 23190452  | 23225126  | protein_coding | 87,50 | 0 |
| ENSG00000132881 | RSG1            | 1  | 16231700  | 16237162  | protein_coding | 87,50 | 0 |
| ENSG00000174996 | KLC2            | 11 | 66257294  | 66267860  | protein_coding | 87,49 | 0 |
| ENSG00000148288 | GBGT1           | 9  | 133152948 | 133163945 | protein_coding | 87,30 | 0 |
| ENSG00000075826 | SEC31B          | 10 | 100486642 | 100519864 | protein_coding | 87,29 | 0 |
| ENSG00000105880 | DLX5            | 7  | 97020392  | 97025097  | protein_coding | 87,28 | 0 |
| ENSG00000149489 | ROM1            | 11 | 62611722  | 62615120  | protein_coding | 87,17 | 0 |
| ENSG00000177051 | FBXO46          | 19 | 45710629  | 45730904  | protein_coding | 87,05 | 0 |
| ENSG00000147231 | CXorf57         | X  | 106611930 | 106679442 | protein_coding | 86,82 | 0 |
| ENSG00000133028 | SCO1            | 17 | 10672474  | 10698375  | protein_coding | 86,82 | 0 |
| ENSG00000173991 | TCAP            | 17 | 39664187  | 39666555  | protein_coding | 86,80 | 0 |
| ENSG00000164062 | APEH            | 3  | 49674002  | 49683963  | protein_coding | 86,47 | 0 |
| ENSG00000116032 | GRIN3B          | 19 | 1000419   | 1009732   | protein_coding | 86,33 | 0 |
| ENSG00000167613 | LAIR1           | 19 | 54351384  | 54370558  | protein_coding | 86,30 | 0 |
| ENSG00000129474 | AJUBA           | 14 | 22971174  | 22982642  | protein_coding | 86,30 | 0 |
| ENSG00000163501 | IHH             | 2  | 219054420 | 219060467 | protein_coding | 86,30 | 0 |
| ENSG00000169258 | GPRIN1          | 5  | 176595802 | 176610133 | protein_coding | 86,20 | 0 |
| ENSG00000189221 | MAOA            | X  | 43654907  | 43746824  | protein_coding | 86,04 | 0 |
| ENSG00000064547 | LPAR2           | 19 | 19623668  | 19628930  | protein_coding | 86,00 | 0 |
| ENSG00000179922 | ZNF784          | 19 | 55620742  | 55624601  | protein_coding | 85,84 | 0 |
| ENSG00000204682 | CASC10          | 10 | 21492658  | 21497262  | protein_coding | 85,80 | 0 |
| ENSG00000272916 | ENSG00000272916 | 10 | 73796514  | 73811651  | protein_coding | 85,77 | 0 |
| ENSG00000133019 | CHRM3           | 1  | 239386565 | 239915452 | protein_coding | 85,73 | 0 |
| ENSG00000163513 | TGFBR2          | 3  | 30606502  | 30694142  | protein_coding | 85,60 | 0 |
| ENSG00000161328 | LRRCS6          | 11 | 537527    | 554916    | protein_coding | 85,50 | 0 |
| ENSG00000182700 | IGIP            | 5  | 140125935 | 140129392 | protein_coding | 85,42 | 0 |
| ENSG00000088386 | SLC15A1         | 13 | 98683801  | 98752654  | protein_coding | 85,37 | 0 |
| ENSG00000064687 | ABCA7           | 19 | 1040101   | 1065572   | protein_coding | 85,32 | 0 |
| ENSG00000162636 | FAM102B         | 1  | 108560089 | 108644900 | protein_coding | 85,31 | 0 |
| ENSG00000116132 | PRRX1           | 1  | 170662728 | 170739419 | protein_coding | 85,30 | 0 |
| ENSG00000188070 | C11orf95        | 11 | 63759892  | 63768775  | protein_coding | 85,24 | 0 |
| ENSG00000105497 | ZNF175          | 19 | 51571298  | 51592508  | protein_coding | 85,23 | 0 |
| ENSG00000125741 | OPA3            | 19 | 45527427  | 45602212  | protein_coding | 85,14 | 0 |
| ENSG00000139428 | MMAB            | 12 | 109553737 | 109573874 | protein_coding | 85,07 | 0 |
| ENSG00000099330 | OCEL1           | 19 | 17226204  | 17229219  | protein_coding | 85,00 | 0 |
| ENSG00000204370 | SDHD            | 11 | 112086773 | 112120013 | protein_coding | 85,00 | 0 |
| ENSG00000128815 | WDFY4           | 10 | 48684876  | 48982956  | protein_coding | 85,00 | 0 |
| ENSG00000171790 | SLFNL1          | 1  | 41015597  | 41023237  | protein_coding | 84,80 | 0 |
| ENSG00000128346 | C22orf23        | 22 | 37943050  | 37953669  | protein_coding | 84,65 | 0 |
| ENSG00000099840 | IZUMO4          | 19 | 2096429   | 2099593   | protein_coding | 84,64 | 0 |
| ENSG00000243811 | APOBEC3D        | 22 | 39014363  | 39033276  | protein_coding | 84,60 | 0 |
| ENSG00000178343 | SHISA3          | 4  | 42397839  | 42402487  | protein_coding | 84,60 | 0 |
| ENSG00000080293 | SCTR            | 2  | 119439843 | 119525301 | protein_coding | 84,60 | 0 |
| ENSG00000173262 | SLC2A14         | 12 | 7812512   | 7891148   | protein_coding | 84,43 | 0 |
| ENSG00000002834 | LASP1           | 17 | 38869859  | 38921770  | protein_coding | 84,36 | 0 |
| ENSG00000119559 | C19orf25        | 19 | 1461143   | 1479556   | protein_coding | 84,25 | 0 |
| ENSG00000075234 | TTC38           | 22 | 46267961  | 46294008  | protein_coding | 84,20 | 0 |
| ENSG00000221994 | ZNF630          | X  | 47983356  | 48071658  | protein_coding | 84,10 | 0 |
| ENSG00000174156 | GSTA3           | 6  | 52847910  | 52909685  | protein_coding | 84,00 | 0 |
| ENSG00000249992 | TMEM158         | 3  | 45224466  | 45226278  | protein_coding | 84,00 | 0 |
| ENSG00000215910 | C1orf167        | 1  | 11761787  | 11789585  | protein_coding | 83,84 | 0 |



|                 |           |    |           |           |                |       |   |
|-----------------|-----------|----|-----------|-----------|----------------|-------|---|
| ENSG00000253626 | EIF5AL1   | 10 | 79512601  | 79516440  | protein_coding | 83,79 | 0 |
| ENSG00000149782 | PLCB3     | 11 | 64251523  | 64269150  | protein_coding | 83,64 | 0 |
| ENSG00000128294 | TPST2     | 22 | 26521983  | 26596717  | protein_coding | 83,57 | 0 |
| ENSG00000136830 | FAM129B   | 9  | 127505339 | 127578989 | protein_coding | 83,51 | 0 |
| ENSG00000117407 | ARTN      | 1  | 43933320  | 43937241  | protein_coding | 83,50 | 0 |
| ENSG00000111885 | MAN1A1    | 6  | 119177209 | 119349761 | protein_coding | 83,50 | 0 |
| ENSG00000205138 | SDHAF1    | 19 | 35995199  | 35996315  | protein_coding | 83,46 | 0 |
| ENSG00000146109 | ABT1      | 6  | 26596952  | 26600744  | protein_coding | 83,31 | 0 |
| ENSG00000168675 | LDLRAD4   | 18 | 13217498  | 13652755  | protein_coding | 83,30 | 0 |
| ENSG00000151006 | PRSS53    | 16 | 31083425  | 31089628  | protein_coding | 83,27 | 0 |
| ENSG00000101463 | SYNDIG1   | 20 | 24469199  | 24666616  | protein_coding | 83,21 | 0 |
| ENSG00000121769 | FABP3     | 1  | 31365625  | 31376850  | protein_coding | 83,13 | 0 |
| ENSG00000115263 | GCG       | 2  | 162142873 | 162152404 | protein_coding | 83,10 | 0 |
| ENSG00000108375 | RNF43     | 17 | 58352500  | 58417595  | protein_coding | 83,00 | 0 |
| ENSG00000160161 | CILP2     | 19 | 19538248  | 19546659  | protein_coding | 82,80 | 0 |
| ENSG00000163734 | CXCL3     | 4  | 74036589  | 74038807  | protein_coding | 82,80 | 0 |
| ENSG00000165271 | NOL6      | 9  | 33461441  | 33473930  | protein_coding | 82,78 | 0 |
| ENSG00000102908 | NFAT5     | 16 | 69565094  | 69704666  | protein_coding | 82,75 | 0 |
| ENSG00000113595 | TRIM23    | 5  | 65589680  | 65625975  | protein_coding | 82,75 | 0 |
| ENSG00000107736 | CDH23     | 10 | 71396934  | 71815947  | protein_coding | 82,70 | 0 |
| ENSG00000006327 | TNFRSF12A | 16 | 3018445   | 3022383   | protein_coding | 82,70 | 0 |
| ENSG00000183010 | PYCR1     | 17 | 81932384  | 81942412  | protein_coding | 82,67 | 0 |
| ENSG00000157734 | SNX22     | 15 | 64151715  | 64157481  | protein_coding | 82,66 | 0 |
| ENSG00000173535 | TNFRSF10C | 8  | 23084355  | 23117437  | protein_coding | 82,64 | 0 |
| ENSG00000158869 | FCER1G    | 1  | 161215234 | 161220699 | protein_coding | 82,60 | 0 |
| ENSG00000008311 | AASS      | 7  | 122075647 | 122144280 | protein_coding | 82,54 | 0 |
| ENSG00000184060 | ADAP2     | 17 | 30906344  | 30959322  | protein_coding | 82,40 | 0 |
| ENSG00000160883 | HK3       | 5  | 176880869 | 176899332 | protein_coding | 82,40 | 0 |
| ENSG00000003137 | CYP26B1   | 2  | 72129238  | 72148038  | protein_coding | 82,30 | 0 |
| ENSG00000143434 | SEMA6C    | 1  | 151131685 | 151146664 | protein_coding | 82,30 | 0 |
| ENSG00000182307 | C8orf33   | 8  | 145052378 | 145056030 | protein_coding | 82,12 | 0 |
| ENSG00000011600 | TYROBP    | 19 | 35904401  | 35908295  | protein_coding | 82,10 | 0 |
| ENSG00000185453 | C19orf68  | 19 | 48170692  | 48197620  | protein_coding | 82,00 | 0 |
| ENSG00000006062 | MAP3K14   | 17 | 45263121  | 45317040  | protein_coding | 82,00 | 0 |
| ENSG00000171302 | CANT1     | 17 | 78991717  | 79009867  | protein_coding | 81,99 | 0 |
| ENSG00000184281 | TSSC4     | 11 | 2400488   | 2403878   | protein_coding | 81,95 | 0 |
| ENSG00000151135 | TMEM263   | 12 | 106955719 | 106978778 | protein_coding | 81,89 | 0 |
| ENSG00000118507 | AKAP7     | 6  | 131135666 | 131283535 | protein_coding | 81,88 | 0 |
| ENSG00000168002 | POLR2G    | 11 | 62761544  | 62766710  | protein_coding | 81,83 | 0 |
| ENSG00000161179 | YDJC      | 22 | 21628089  | 21630064  | protein_coding | 81,75 | 0 |
| ENSG00000129128 | SPCS3     | 4  | 176319964 | 176332245 | protein_coding | 81,72 | 0 |
| ENSG00000106976 | DNM1      | 9  | 128203352 | 128255248 | protein_coding | 81,70 | 0 |
| ENSG00000142910 | TINAGL1   | 1  | 31576485  | 31587686  | protein_coding | 81,70 | 0 |
| ENSG00000102349 | KLF8      | X  | 56232421  | 56287889  | protein_coding | 81,70 | 0 |
| ENSG00000196502 | SULT1A1   | 16 | 28605196  | 28623625  | protein_coding | 81,60 | 0 |
| ENSG00000147100 | SLC16A2   | X  | 74421461  | 74533917  | protein_coding | 81,60 | 0 |
| ENSG00000184634 | MED12     | X  | 71118556  | 71142454  | protein_coding | 81,52 | 0 |
| ENSG00000172340 | SUCLG2    | 3  | 67360460  | 67654614  | protein_coding | 81,50 | 0 |
| ENSG00000127419 | TMEM175   | 4  | 932387    | 958656    | protein_coding | 81,47 | 0 |
| ENSG00000137714 | FDX1      | 11 | 110429883 | 110464881 | protein_coding | 81,45 | 0 |
| ENSG00000164318 | EGFLAM    | 5  | 38258409  | 38465021  | protein_coding | 81,40 | 0 |
| ENSG00000111653 | ING4      | 12 | 6650280   | 6663148   | protein_coding | 81,28 | 0 |
| ENSG00000111335 | OAS2      | 12 | 112978395 | 113011723 | protein_coding | 81,18 | 0 |
| ENSG00000123374 | CDK2      | 12 | 55966769  | 55972784  | protein_coding | 81,16 | 0 |
| ENSG00000164056 | SPRY1     | 4  | 123396795 | 123403760 | protein_coding | 81,14 | 0 |
| ENSG00000115657 | ABCB6     | 2  | 219209768 | 219218990 | protein_coding | 81,10 | 0 |
| ENSG00000143502 | SUSD4     | 1  | 223220819 | 223364202 | protein_coding | 81,07 | 0 |
| ENSG00000181513 | ACBD4     | 17 | 45132600  | 45144181  | protein_coding | 81,00 | 0 |

|                 |           |    |           |           |                |       |   |
|-----------------|-----------|----|-----------|-----------|----------------|-------|---|
| ENSG00000172269 | DPAGT1    | 11 | 119096503 | 119108331 | protein_coding | 80,95 | 0 |
| ENSG00000065802 | ASB1      | 2  | 238426742 | 238452250 | protein_coding | 80,89 | 0 |
| ENSG00000204228 | HSD17B8   | 6  | 33204642  | 33206831  | protein_coding | 80,86 | 0 |
| ENSG00000071967 | CYBRD1    | 2  | 171522247 | 171558133 | protein_coding | 80,85 | 0 |
| ENSG00000130024 | PHF10     | 6  | 169703905 | 169725566 | protein_coding | 80,85 | 0 |
| ENSG00000107984 | DKK1      | 10 | 52314296  | 52318042  | protein_coding | 80,70 | 0 |
| ENSG00000182230 | FAM153B   | 5  | 176060689 | 176132258 | protein_coding | 80,63 | 0 |
| ENSG00000196267 | ZNF836    | 19 | 52153864  | 52171643  | protein_coding | 80,61 | 0 |
| ENSG00000135709 | KIAA0513  | 16 | 85027751  | 85094230  | protein_coding | 80,57 | 0 |
| ENSG00000164211 | STARD4    | 5  | 111496033 | 111512590 | protein_coding | 80,53 | 0 |
| ENSG00000166257 | SCN3B     | 11 | 123629187 | 123655244 | protein_coding | 80,50 | 0 |
| ENSG00000107331 | ABCA2     | 9  | 137007227 | 137028922 | protein_coding | 80,49 | 0 |
| ENSG00000013563 | DNASE1L1  | X  | 154401238 | 154412112 | protein_coding | 80,43 | 0 |
| ENSG00000143641 | GALNT2    | 1  | 230057990 | 230282124 | protein_coding | 80,38 | 0 |
| ENSG00000137462 | TLR2      | 4  | 153701500 | 153705699 | protein_coding | 80,30 | 0 |
| ENSG00000054219 | LY75      | 2  | 159803355 | 159904749 | protein_coding | 80,30 | 0 |
| ENSG00000141086 | CTRL      | 16 | 67927640  | 67932414  | protein_coding | 80,26 | 0 |
| ENSG00000142544 | CTU1      | 19 | 51097606  | 51108370  | protein_coding | 79,90 | 0 |
| ENSG00000167657 | DAPK3     | 19 | 3958453   | 3971123   | protein_coding | 79,87 | 0 |
| ENSG00000135077 | HAVCR2    | 5  | 157085832 | 157142869 | protein_coding | 79,80 | 0 |
| ENSG00000275395 | FCGBP     | 19 | 39863323  | 39934626  | protein_coding | 79,79 | 0 |
| ENSG00000152556 | PFKM      | 12 | 48105139  | 48146404  | protein_coding | 79,50 | 0 |
| ENSG00000088367 | EPB41L1   | 20 | 36091504  | 36232799  | protein_coding | 79,46 | 0 |
| ENSG00000154864 | PIEZO2    | 18 | 10666483  | 11148762  | protein_coding | 79,40 | 0 |
| ENSG00000136463 | TACO1     | 17 | 63600872  | 63608365  | protein_coding | 79,40 | 0 |
| ENSG00000169756 | LIMS1     | 2  | 108534355 | 108687246 | protein_coding | 79,33 | 0 |
| ENSG00000163331 | DAPL1     | 2  | 158795317 | 158862958 | protein_coding | 79,30 | 0 |
| ENSG00000140326 | CDAN1     | 15 | 42723559  | 42737126  | protein_coding | 79,24 | 0 |
| ENSG00000275183 | LENG9     | 19 | 54461796  | 54463711  | protein_coding | 79,21 | 0 |
| ENSG00000176971 | FIBIN     | 11 | 26994184  | 26996121  | protein_coding | 79,20 | 0 |
| ENSG00000163866 | SMIM12    | 1  | 34712737  | 34859816  | protein_coding | 79,16 | 0 |
| ENSG00000007202 | KIAA0100  | 17 | 28614440  | 28645454  | protein_coding | 78,95 | 0 |
| ENSG00000176387 | HSD11B2   | 16 | 67430652  | 67437553  | protein_coding | 78,93 | 0 |
| ENSG00000080573 | COL5A3    | 19 | 9959561   | 10010471  | protein_coding | 78,90 | 0 |
| ENSG00000111640 | GAPDH     | 12 | 6533927   | 6538374   | protein_coding | 78,85 | 0 |
| ENSG00000104267 | CA2       | 8  | 85463852  | 85481493  | protein_coding | 78,70 | 0 |
| ENSG00000176014 | TUBB6     | 18 | 12307669  | 12344320  | protein_coding | 78,66 | 0 |
| ENSG00000136869 | TLR4      | 9  | 117704332 | 117716871 | protein_coding | 78,57 | 0 |
| ENSG00000103490 | PYCARD    | 16 | 31201485  | 31203450  | protein_coding | 78,50 | 0 |
| ENSG00000112659 | CUL9      | 6  | 43182175  | 43224587  | protein_coding | 78,47 | 0 |
| ENSG00000071246 | VASH1     | 14 | 76762189  | 76783015  | protein_coding | 78,45 | 0 |
| ENSG00000092931 | MFSD11    | 17 | 76735865  | 76781449  | protein_coding | 78,23 | 0 |
| ENSG00000256269 | HMBS      | 11 | 119084866 | 119093549 | protein_coding | 78,16 | 0 |
| ENSG00000130940 | CASZ1     | 1  | 10636604  | 10796650  | protein_coding | 78,05 | 0 |
| ENSG00000120875 | DUSP4     | 8  | 29333064  | 29350668  | protein_coding | 78,00 | 0 |
| ENSG00000226887 | ERVMER34- | 4  | 52722618  | 52751640  | protein_coding | 78,00 | 0 |
| ENSG00000076258 | FMO4      | 1  | 171314208 | 171342084 | protein_coding | 78,00 | 0 |
| ENSG00000182463 | TSHZ2     | 20 | 52972407  | 53495330  | protein_coding | 77,99 | 0 |
| ENSG00000167614 | TTYH1     | 19 | 54415219  | 54436900  | protein_coding | 77,90 | 0 |
| ENSG00000066735 | KIF26A    | 14 | 104138723 | 104180894 | protein_coding | 77,83 | 0 |
| ENSG00000127837 | AAMP      | 2  | 218264123 | 218270257 | protein_coding | 77,75 | 0 |
| ENSG00000141741 | MIEN1     | 17 | 39728496  | 39730787  | protein_coding | 77,65 | 0 |
| ENSG00000198324 | FAM109A   | 12 | 111360651 | 111369121 | protein_coding | 77,61 | 0 |
| ENSG00000102890 | ELMO3     | 16 | 67199111  | 67204029  | protein_coding | 77,60 | 0 |
| ENSG00000197013 | ZNF429    | 19 | 21496682  | 21556270  | protein_coding | 77,37 | 0 |
| ENSG00000197863 | ZNF790    | 19 | 36817428  | 36850787  | protein_coding | 77,35 | 0 |
| ENSG00000010803 | SCMH1     | 1  | 41027200  | 41242154  | protein_coding | 77,32 | 0 |
| ENSG00000197757 | HOXC6     | 12 | 53990624  | 54030823  | protein_coding | 77,30 | 0 |

|                 |          |    |           |           |                |       |   |
|-----------------|----------|----|-----------|-----------|----------------|-------|---|
| ENSG00000151208 | DLG5     | 10 | 77790791  | 77926526  | protein_coding | 77,24 | 0 |
| ENSG00000131831 | RAI2     | X  | 17800049  | 17861337  | protein_coding | 77,21 | 0 |
| ENSG00000167965 | MLST8    | 16 | 2204248   | 2209416   | protein_coding | 77,12 | 0 |
| ENSG00000184470 | TXNRD2   | 22 | 19875517  | 19941992  | protein_coding | 77,10 | 0 |
| ENSG00000118263 | KLF7     | 2  | 207074137 | 207167267 | protein_coding | 77,06 | 0 |
| ENSG00000130758 | MAP3K10  | 19 | 40191744  | 40215575  | protein_coding | 77,01 | 0 |
| ENSG00000221926 | TRIM16   | 17 | 15627960  | 15684311  | protein_coding | 76,93 | 0 |
| ENSG00000139687 | RB1      | 13 | 48303751  | 48481986  | protein_coding | 76,88 | 0 |
| ENSG00000144366 | GULP1    | 2  | 188291669 | 188595931 | protein_coding | 76,60 | 0 |
| ENSG00000189410 | SH2D5    | 1  | 20719732  | 20732837  | protein_coding | 76,60 | 0 |
| ENSG00000197852 | FAM212B  | 1  | 111680630 | 111755824 | protein_coding | 76,58 | 0 |
| ENSG00000249471 | ZNF324B  | 19 | 58451604  | 58457833  | protein_coding | 76,40 | 0 |
| ENSG00000145824 | CXCL14   | 5  | 135570679 | 135579279 | protein_coding | 76,40 | 0 |
| ENSG00000132768 | DPH2     | 1  | 43970000  | 43973369  | protein_coding | 76,39 | 0 |
| ENSG00000183751 | TBL3     | 16 | 1972037   | 1982933   | protein_coding | 76,38 | 0 |
| ENSG00000131165 | CHMP1A   | 16 | 89644431  | 89657845  | protein_coding | 76,37 | 0 |
| ENSG00000198003 | CCDC151  | 19 | 11420604  | 11435782  | protein_coding | 76,33 | 0 |
| ENSG00000172830 | SSH3     | 11 | 67303448  | 67312607  | protein_coding | 76,27 | 0 |
| ENSG00000161013 | MGAT4B   | 5  | 179797597 | 179806952 | protein_coding | 76,27 | 0 |
| ENSG00000153132 | CLGN     | 4  | 140388455 | 140427968 | protein_coding | 76,25 | 0 |
| ENSG00000132694 | ARHGEF11 | 1  | 156934840 | 157045370 | protein_coding | 76,20 | 0 |
| ENSG00000181649 | PHLDA2   | 11 | 2928273   | 2929455   | protein_coding | 76,20 | 0 |
| ENSG00000271425 | NBPF10   | 1  | 146064699 | 146144942 | protein_coding | 76,14 | 0 |
| ENSG00000104164 | BLOC1S6  | 15 | 45587123  | 45615999  | protein_coding | 76,09 | 0 |
| ENSG00000170421 | KRT8     | 12 | 52897187  | 52949954  | protein_coding | 75,96 | 0 |
| ENSG00000109917 | ZPR1     | 11 | 116773799 | 116788050 | protein_coding | 75,91 | 0 |
| ENSG00000126464 | PRR12    | 19 | 49591643  | 49626439  | protein_coding | 75,85 | 0 |
| ENSG00000172716 | SLFN11   | 17 | 35350305  | 35373701  | protein_coding | 75,80 | 0 |
| ENSG00000145901 | TNIP1    | 5  | 151029945 | 151093577 | protein_coding | 75,74 | 0 |
| ENSG00000135502 | SLC26A10 | 12 | 57619527  | 57626151  | protein_coding | 75,70 | 0 |
| ENSG00000142173 | COL6A2   | 21 | 46098097  | 46132849  | protein_coding | 75,63 | 0 |
| ENSG00000102878 | HSF4     | 16 | 67164681  | 67169945  | protein_coding | 75,61 | 0 |
| ENSG00000095564 | BTA1F1   | 10 | 91923769  | 92030325  | protein_coding | 75,52 | 0 |
| ENSG00000117054 | ACADM    | 1  | 75724347  | 75787575  | protein_coding | 75,43 | 0 |
| ENSG00000105401 | CDC37    | 19 | 10391134  | 10420121  | protein_coding | 75,39 | 0 |
| ENSG00000158290 | CUL4B    | X  | 120524609 | 120575794 | protein_coding | 75,25 | 0 |
| ENSG00000177963 | RIC8A    | 11 | 207511    | 215113    | protein_coding | 75,25 | 0 |
| ENSG00000213983 | AP1G2    | 14 | 23559565  | 23568070  | protein_coding | 75,21 | 0 |
| ENSG00000147642 | SYBU     | 8  | 109573978 | 109691791 | protein_coding | 75,19 | 0 |
| ENSG00000184465 | WDR27    | 6  | 169457212 | 169702048 | protein_coding | 75,04 | 0 |
| ENSG00000118804 | STBD1    | 4  | 76306026  | 76311599  | protein_coding | 74,90 | 0 |
| ENSG00000160679 | CHTOP    | 1  | 153633982 | 153646306 | protein_coding | 74,87 | 0 |
| ENSG00000278129 | ZNF8     | 19 | 58278951  | 58302805  | protein_coding | 74,72 | 0 |
| ENSG00000206432 | TMEM200C | 18 | 5882072   | 5895955   | protein_coding | 74,70 | 0 |
| ENSG00000156860 | FBRS     | 16 | 30658431  | 30670814  | protein_coding | 74,70 | 0 |
| ENSG00000168077 | SCARA3   | 8  | 27633868  | 27676776  | protein_coding | 74,58 | 0 |
| ENSG00000171443 | ZNF524   | 19 | 55600022  | 55603138  | protein_coding | 74,54 | 0 |
| ENSG00000188976 | NOC2L    | 1  | 944204    | 959309    | protein_coding | 74,49 | 0 |
| ENSG00000028310 | BRD9     | 5  | 850291    | 892824    | protein_coding | 74,40 | 0 |
| ENSG00000257218 | GATC     | 12 | 120446438 | 120463749 | protein_coding | 74,36 | 0 |
| ENSG00000100842 | EFS      | 14 | 23356402  | 23365752  | protein_coding | 74,30 | 0 |
| ENSG00000137959 | IFI44L   | 1  | 78619922  | 78646145  | protein_coding | 74,20 | 0 |
| ENSG00000158714 | SLAMF8   | 1  | 159826750 | 159837249 | protein_coding | 74,20 | 0 |
| ENSG00000113361 | CDH6     | 5  | 31193750  | 31329146  | protein_coding | 74,15 | 0 |
| ENSG00000078618 | NRD1     | 1  | 51789191  | 51878937  | protein_coding | 74,11 | 0 |
| ENSG00000184508 | HDDC3    | 15 | 90929964  | 90932569  | protein_coding | 74,07 | 0 |
| ENSG00000140285 | FGF7     | 15 | 49423096  | 49488775  | protein_coding | 74,04 | 0 |
| ENSG00000100599 | RIN3     | 14 | 92513774  | 92688994  | protein_coding | 74,00 | 0 |

|                 |           |    |           |           |                |       |   |
|-----------------|-----------|----|-----------|-----------|----------------|-------|---|
| ENSG00000169967 | MAP3K2    | 2  | 127298730 | 127388465 | protein_coding | 73,99 | 0 |
| ENSG00000175066 | GK5       | 3  | 142157527 | 142225607 | protein_coding | 73,96 | 0 |
| ENSG00000197044 | ZNF441    | 19 | 11767000  | 11784078  | protein_coding | 73,86 | 0 |
| ENSG00000234465 | PINLYP    | 19 | 43576800  | 43583964  | protein_coding | 73,80 | 0 |
| ENSG00000261408 | TEN1-CDK3 | 17 | 75979231  | 76005999  | protein_coding | 73,70 | 0 |
| ENSG00000140398 | NEIL1     | 15 | 75346955  | 75357114  | protein_coding | 73,63 | 0 |
| ENSG00000184785 | SMIM10    | X  | 134990938 | 134992473 | protein_coding | 73,60 | 0 |
| ENSG00000157343 | ARMC12    | 6  | 35737032  | 35749079  | protein_coding | 73,54 | 0 |
| ENSG00000104812 | GYS1      | 19 | 48968125  | 48993310  | protein_coding | 73,47 | 0 |
| ENSG00000213906 | LTB4R2    | 14 | 24305734  | 24312053  | protein_coding | 73,40 | 0 |
| ENSG00000148488 | ST8SIA6   | 10 | 17318383  | 17454330  | protein_coding | 73,40 | 0 |
| ENSG00000081692 | JMJD4     | 1  | 227730425 | 227735411 | protein_coding | 73,37 | 0 |
| ENSG00000146859 | TMEM140   | 7  | 135148072 | 135166215 | protein_coding | 73,32 | 0 |
| ENSG00000173542 | MOB1B     | 4  | 70902326  | 71022449  | protein_coding | 73,24 | 0 |
| ENSG00000255398 | HCAR3     | 12 | 122714756 | 122716892 | protein_coding | 73,20 | 0 |
| ENSG00000242498 | ARPIN     | 15 | 89895006  | 89912956  | protein_coding | 73,15 | 0 |
| ENSG00000134463 | ECHDC3    | 10 | 11742366  | 11764070  | protein_coding | 73,14 | 0 |
| ENSG00000185811 | IKZF1     | 7  | 50304124  | 50405101  | protein_coding | 73,10 | 0 |
| ENSG00000064545 | TMEM161A  | 19 | 19119169  | 19138513  | protein_coding | 73,08 | 0 |
| ENSG00000162817 | C1orf115  | 1  | 220689845 | 220699157 | protein_coding | 73,04 | 0 |
| ENSG00000165644 | COMTD1    | 10 | 75233969  | 75236030  | protein_coding | 73,00 | 0 |
| ENSG00000112303 | VNN2      | 6  | 132743870 | 132763459 | protein_coding | 73,00 | 0 |
| ENSG00000135414 | GDF11     | 12 | 55743280  | 55757278  | protein_coding | 72,94 | 0 |
| ENSG00000136270 | TBRG4     | 7  | 45100100  | 45112047  | protein_coding | 72,74 | 0 |
| ENSG00000112378 | PERP      | 6  | 138088505 | 138107511 | protein_coding | 72,73 | 0 |
| ENSG00000135506 | OS9       | 12 | 57693955  | 57721557  | protein_coding | 72,69 | 0 |
| ENSG00000137834 | SMAD6     | 15 | 66702228  | 66782848  | protein_coding | 72,61 | 0 |
| ENSG00000265972 | TXNIP     | 1  | 145992435 | 145996600 | protein_coding | 72,58 | 0 |
| ENSG00000168802 | CHTF8     | 16 | 69118010  | 69132584  | protein_coding | 72,58 | 0 |
| ENSG00000003756 | RBM5      | 3  | 50088908  | 50119021  | protein_coding | 72,58 | 0 |
| ENSG00000116678 | LEPR      | 1  | 65420652  | 65641559  | protein_coding | 72,58 | 0 |
| ENSG00000243317 | C7orf73   | 7  | 135662496 | 135693418 | protein_coding | 72,52 | 0 |
| ENSG00000180638 | SLC47A2   | 17 | 19678288  | 19718979  | protein_coding | 72,50 | 0 |
| ENSG00000006756 | ARSD      | X  | 2903970   | 2929351   | protein_coding | 72,37 | 0 |
| ENSG00000196782 | MAML3     | 4  | 139716753 | 140154184 | protein_coding | 72,34 | 0 |
| ENSG00000160972 | PPP1R16A  | 8  | 144477969 | 144502121 | protein_coding | 72,32 | 0 |
| ENSG00000179954 | SSC5D     | 19 | 55488404  | 55519098  | protein_coding | 72,32 | 0 |
| ENSG00000278619 | MRM1      | 17 | 36601572  | 36608971  | protein_coding | 72,20 | 0 |
| ENSG00000188536 | HBA2      | 16 | 172847    | 173710    | protein_coding | 72,20 | 0 |
| ENSG00000160862 | AZGP1     | 7  | 99966720  | 99976157  | protein_coding | 72,20 | 0 |
| ENSG00000122122 | SASH3     | X  | 129779979 | 129795201 | protein_coding | 72,20 | 0 |
| ENSG00000131943 | C19orf12  | 19 | 29698886  | 29715789  | protein_coding | 72,19 | 0 |
| ENSG00000074696 | HACD3     | 15 | 65530418  | 65578352  | protein_coding | 72,15 | 0 |
| ENSG00000183340 | JRKL      | 11 | 96389989  | 96507574  | protein_coding | 72,13 | 0 |
| ENSG00000138829 | FBN2      | 5  | 128257909 | 128659185 | protein_coding | 72,10 | 0 |
| ENSG00000165280 | VCP       | 9  | 35056064  | 35073249  | protein_coding | 72,09 | 0 |
| ENSG00000143630 | HCN3      | 1  | 155277583 | 155289848 | protein_coding | 72,08 | 0 |
| ENSG00000102125 | TAZ       | X  | 154411518 | 154421726 | protein_coding | 72,06 | 0 |
| ENSG00000203879 | GDI1      | X  | 154436913 | 154443467 | protein_coding | 72,04 | 0 |
| ENSG00000187954 | CYHR1     | 8  | 144449582 | 144465677 | protein_coding | 72,01 | 0 |
| ENSG00000073910 | FRY       | 13 | 32031300  | 32299122  | protein_coding | 72,00 | 0 |
| ENSG00000197558 | SSPO      | 7  | 149776042 | 149833979 | protein_coding | 72,00 | 0 |
| ENSG00000197324 | LRP10     | 14 | 22871613  | 22881580  | protein_coding | 71,74 | 0 |
| ENSG00000198771 | RCSD1     | 1  | 167630093 | 167706249 | protein_coding | 71,70 | 0 |
| ENSG00000127989 | MTERF1    | 7  | 91692008  | 91880720  | protein_coding | 71,62 | 0 |
| ENSG00000124134 | KCNS1     | 20 | 45092310  | 45101112  | protein_coding | 71,58 | 0 |
| ENSG00000086730 | LAT2      | 7  | 74199652  | 74229834  | protein_coding | 71,50 | 0 |
| ENSG00000108828 | VAT1      | 17 | 43014605  | 43025123  | protein_coding | 71,46 | 0 |

|                 |            |    |           |           |                |       |   |
|-----------------|------------|----|-----------|-----------|----------------|-------|---|
| ENSG00000178531 | CTXN1      | 19 | 7924485   | 7926166   | protein_coding | 71,46 | 0 |
| ENSG00000111907 | TPD52L1    | 6  | 125119049 | 125264407 | protein_coding | 71,40 | 0 |
| ENSG00000074266 | EED        | 11 | 86244544  | 86278813  | protein_coding | 71,35 | 0 |
| ENSG00000151233 | GXYLT1     | 12 | 42081845  | 42144879  | protein_coding | 71,30 | 0 |
| ENSG00000009830 | POMT2      | 14 | 77274956  | 77320884  | protein_coding | 71,24 | 0 |
| ENSG00000239789 | MRPS17     | 7  | 55951819  | 55956501  | protein_coding | 71,23 | 0 |
| ENSG00000102312 | PORCN      | X  | 48508962  | 48520814  | protein_coding | 71,23 | 0 |
| ENSG00000206530 | CFAP44     | 3  | 113286930 | 113441610 | protein_coding | 71,19 | 0 |
| ENSG00000244242 | IFITM10    | 11 | 1732410   | 1750591   | protein_coding | 71,10 | 0 |
| ENSG00000119638 | NEK9       | 14 | 75079353  | 75127344  | protein_coding | 71,07 | 0 |
| ENSG00000105197 | TIMM50     | 19 | 39480412  | 39493785  | protein_coding | 70,93 | 0 |
| ENSG00000279152 | ENSG000002 | 17 | 8188933   | 8189688   | protein_coding | 70,90 | 0 |
| ENSG00000100307 | CBX7       | 22 | 39120167  | 39152674  | protein_coding | 70,84 | 0 |
| ENSG00000137103 | TMEM8B     | 9  | 35814451  | 35854847  | protein_coding | 70,78 | 0 |
| ENSG00000047648 | ARHGAP6    | X  | 11137543  | 11665701  | protein_coding | 70,75 | 0 |
| ENSG00000213213 | CCDC183    | 9  | 136796350 | 136807741 | protein_coding | 70,70 | 0 |
| ENSG00000087266 | SH3BP2     | 4  | 2793023   | 2841098   | protein_coding | 70,64 | 0 |
| ENSG00000158109 | TPRG1L     | 1  | 3625002   | 3630127   | protein_coding | 70,63 | 0 |
| ENSG00000126261 | UBA2       | 19 | 34428352  | 34471251  | protein_coding | 70,63 | 0 |
| ENSG00000075624 | ACTB       | 7  | 5527151   | 5563784   | protein_coding | 70,62 | 0 |
| ENSG00000176058 | TPRN       | 9  | 137191617 | 137204193 | protein_coding | 70,50 | 0 |
| ENSG00000113119 | TMCO6      | 5  | 140639427 | 140645408 | protein_coding | 70,47 | 0 |
| ENSG00000172888 | ZNF621     | 3  | 40524878  | 40574685  | protein_coding | 70,46 | 0 |
| ENSG00000196391 | ZNF774     | 15 | 90352245  | 90369146  | protein_coding | 70,45 | 0 |
| ENSG00000161202 | DVL3       | 3  | 184155388 | 184173610 | protein_coding | 70,39 | 0 |
| ENSG00000137841 | PLCB2      | 15 | 40278176  | 40307935  | protein_coding | 70,38 | 0 |
| ENSG00000188766 | SPRED3     | 19 | 38388421  | 38399587  | protein_coding | 70,37 | 0 |
| ENSG00000135333 | EPHA7      | 6  | 93240020  | 93419547  | protein_coding | 70,20 | 0 |
| ENSG00000168621 | GDNF       | 5  | 37812677  | 37839686  | protein_coding | 70,20 | 0 |
| ENSG00000165102 | HGSNAT     | 8  | 43140455  | 43202855  | protein_coding | 70,12 | 0 |
| ENSG00000079739 | PGM1       | 1  | 63593276  | 63660245  | protein_coding | 70,10 | 0 |
| ENSG00000256591 | ENSG000002 | 11 | 61429220  | 61485822  | protein_coding | 70,00 | 0 |
| ENSG00000155099 | TMEM55A    | 8  | 90993796  | 91041064  | protein_coding | 70,00 | 0 |
| ENSG00000169217 | CD2BP2     | 16 | 30350766  | 30355361  | protein_coding | 69,90 | 0 |
| ENSG00000129562 | DAD1       | 14 | 22564905  | 22589269  | protein_coding | 69,88 | 0 |
| ENSG00000244038 | DDOST      | 1  | 20651767  | 20661544  | protein_coding | 69,86 | 0 |
| ENSG00000167118 | URM1       | 9  | 128371319 | 128392016 | protein_coding | 69,81 | 0 |
| ENSG00000163528 | CHCHD4     | 3  | 14112077  | 14124870  | protein_coding | 69,78 | 0 |
| ENSG00000159189 | C1QC       | 1  | 22643630  | 22648110  | protein_coding | 69,70 | 0 |
| ENSG00000138660 | AP1AR      | 4  | 112231737 | 112270047 | protein_coding | 69,60 | 0 |
| ENSG00000130748 | TMEM160    | 19 | 47045907  | 47048630  | protein_coding | 69,57 | 0 |
| ENSG00000162576 | MXRA8      | 1  | 1352689   | 1361777   | protein_coding | 69,56 | 0 |
| ENSG00000142606 | MMEL1      | 1  | 2590639   | 2632990   | protein_coding | 69,53 | 0 |
| ENSG00000102886 | GDPD3      | 16 | 30104810  | 30113856  | protein_coding | 69,50 | 0 |
| ENSG00000102003 | SYP        | X  | 49187804  | 49200259  | protein_coding | 69,50 | 0 |
| ENSG00000205593 | DENND6B    | 22 | 50309030  | 50327060  | protein_coding | 69,47 | 0 |
| ENSG00000170820 | FSHR       | 2  | 48962157  | 49154537  | protein_coding | 69,43 | 0 |
| ENSG00000089723 | OTUB2      | 14 | 94026329  | 94048930  | protein_coding | 69,42 | 0 |
| ENSG00000147813 | NAPRT      | 8  | 143574785 | 143578649 | protein_coding | 69,40 | 0 |
| ENSG00000197417 | SHPK       | 17 | 3608262   | 3636322   | protein_coding | 69,20 | 0 |
| ENSG00000140995 | DEF8       | 16 | 89947925  | 89968060  | protein_coding | 69,18 | 0 |
| ENSG00000197483 | ZNF628     | 19 | 55476332  | 55484487  | protein_coding | 69,17 | 0 |
| ENSG00000176024 | ZNF613     | 19 | 51879872  | 51948759  | protein_coding | 69,11 | 0 |
| ENSG00000102531 | FNDC3A     | 13 | 48975912  | 49209779  | protein_coding | 69,11 | 0 |
| ENSG00000172046 | USP19      | 3  | 49108046  | 49120938  | protein_coding | 69,08 | 0 |
| ENSG00000186765 | FSCN2      | 17 | 81528396  | 81537130  | protein_coding | 69,00 | 0 |
| ENSG00000140481 | CCDC33     | 15 | 74236289  | 74336472  | protein_coding | 69,00 | 0 |
| ENSG00000172243 | CLEC7A     | 12 | 10116777  | 10130258  | protein_coding | 69,00 | 0 |

|                 |           |    |           |           |                |       |   |
|-----------------|-----------|----|-----------|-----------|----------------|-------|---|
| ENSG00000184788 | SATL1     | X  | 85092287  | 85109048  | protein_coding | 69,00 | 0 |
| ENSG00000198198 | SZT2      | 1  | 43389882  | 43452650  | protein_coding | 68,82 | 0 |
| ENSG00000141012 | GALNS     | 16 | 88813734  | 88856970  | protein_coding | 68,81 | 0 |
| ENSG00000196735 | HLA-DQA1  | 6  | 32628179  | 32647062  | protein_coding | 68,80 | 0 |
| ENSG00000154639 | CXADR     | 21 | 17512382  | 17593579  | protein_coding | 68,74 | 0 |
| ENSG00000196154 | S100A4    | 1  | 153543613 | 153550136 | protein_coding | 68,70 | 0 |
| ENSG00000182272 | B4GALNT4  | 11 | 369796    | 382116    | protein_coding | 68,69 | 0 |
| ENSG00000213563 | C8orf82   | 8  | 144525733 | 144529132 | protein_coding | 68,66 | 0 |
| ENSG00000166734 | CASC4     | 15 | 44288729  | 44415758  | protein_coding | 68,62 | 0 |
| ENSG00000149743 | TRPT1     | 11 | 64223799  | 64226254  | protein_coding | 68,60 | 0 |
| ENSG00000119922 | IFIT2     | 10 | 89301955  | 89309276  | protein_coding | 68,60 | 0 |
| ENSG00000179564 | LSMEM2    | 3  | 50279027  | 50288114  | protein_coding | 68,60 | 0 |
| ENSG00000115523 | GNLY      | 2  | 85685175  | 85698854  | protein_coding | 68,60 | 0 |
| ENSG00000153246 | PLA2R1    | 2  | 159932006 | 160062610 | protein_coding | 68,57 | 0 |
| ENSG00000166173 | LARP6     | 15 | 70829130  | 70854159  | protein_coding | 68,56 | 0 |
| ENSG00000005249 | PRKAR2B   | 7  | 107044649 | 107161811 | protein_coding | 68,52 | 0 |
| ENSG00000163785 | RYK       | 3  | 134065303 | 134250744 | protein_coding | 68,51 | 0 |
| ENSG00000159882 | ZNF230    | 19 | 44002948  | 44013926  | protein_coding | 68,50 | 0 |
| ENSG00000174791 | RIN1      | 11 | 66330242  | 66336840  | protein_coding | 68,50 | 0 |
| ENSG00000177669 | MBOAT4    | 8  | 30131824  | 30144686  | protein_coding | 68,50 | 0 |
| ENSG00000106346 | USP42     | 7  | 6104884   | 6161564   | protein_coding | 68,47 | 0 |
| ENSG00000143819 | EPHX1     | 1  | 225810092 | 225845563 | protein_coding | 68,46 | 0 |
| ENSG00000100029 | PES1      | 22 | 30576625  | 30607083  | protein_coding | 68,45 | 0 |
| ENSG00000184967 | NOC4L     | 12 | 132144448 | 132152473 | protein_coding | 68,41 | 0 |
| ENSG00000136738 | STAM      | 10 | 17644125  | 17715914  | protein_coding | 68,34 | 0 |
| ENSG00000139291 | TMEM19    | 12 | 71686087  | 71705046  | protein_coding | 68,29 | 0 |
| ENSG00000071553 | ATP6AP1   | X  | 154428632 | 154436516 | protein_coding | 68,25 | 0 |
| ENSG00000177303 | CASKIN2   | 17 | 75500261  | 75515583  | protein_coding | 68,18 | 0 |
| ENSG00000112062 | MAPK14    | 6  | 36027677  | 36111236  | protein_coding | 68,17 | 0 |
| ENSG00000079805 | DNM2      | 19 | 10718079  | 10833488  | protein_coding | 68,09 | 0 |
| ENSG00000187994 | RINL      | 19 | 38867834  | 38878279  | protein_coding | 68,07 | 0 |
| ENSG00000108819 | PPP1R9B   | 17 | 50133735  | 50150630  | protein_coding | 68,02 | 0 |
| ENSG00000177082 | WDR73     | 15 | 84639281  | 84654343  | protein_coding | 68,02 | 0 |
| ENSG00000139549 | DHH       | 12 | 49089421  | 49094819  | protein_coding | 68,00 | 0 |
| ENSG00000175203 | DCTN2     | 12 | 57530102  | 57547331  | protein_coding | 68,00 | 0 |
| ENSG00000185361 | TNFAIP8L1 | 19 | 4639518   | 4655568   | protein_coding | 67,94 | 0 |
| ENSG00000069122 | ADGRF5    | 6  | 46852512  | 46954943  | protein_coding | 67,90 | 0 |
| ENSG00000165055 | METTL2B   | 7  | 128476729 | 128506602 | protein_coding | 67,86 | 0 |
| ENSG00000163931 | TKT       | 3  | 53224707  | 53256052  | protein_coding | 67,79 | 0 |
| ENSG00000219200 | RNASEK    | 17 | 7012417   | 7014532   | protein_coding | 67,73 | 0 |
| ENSG00000161798 | AQP5      | 12 | 49961870  | 49965681  | protein_coding | 67,73 | 0 |
| ENSG00000139112 | GABARAPL1 | 12 | 10212458  | 10223130  | protein_coding | 67,65 | 0 |
| ENSG00000100300 | TSP0      | 22 | 43151514  | 43163242  | protein_coding | 67,64 | 0 |
| ENSG00000219626 | FAM228B   | 2  | 24076526  | 24169640  | protein_coding | 67,60 | 0 |
| ENSG00000163590 | PPM1L     | 3  | 160755602 | 161078907 | protein_coding | 67,56 | 0 |
| ENSG00000176715 | ACSF3     | 16 | 89088375  | 89155846  | protein_coding | 67,55 | 0 |
| ENSG00000043143 | JADE2     | 5  | 134524312 | 134583230 | protein_coding | 67,49 | 0 |
| ENSG00000107521 | HPS1      | 10 | 98416198  | 98446947  | protein_coding | 67,48 | 0 |
| ENSG00000176087 | SLC35A4   | 5  | 140564456 | 140569103 | protein_coding | 67,47 | 0 |
| ENSG00000167695 | FAM57A    | 17 | 732412    | 742972    | protein_coding | 67,45 | 0 |
| ENSG00000160961 | ZNF333    | 19 | 14689801  | 14733746  | protein_coding | 67,44 | 0 |
| ENSG00000101413 | RPRD1B    | 20 | 38033546  | 38127780  | protein_coding | 67,42 | 0 |
| ENSG00000133250 | ZNF414    | 19 | 8509678   | 8514164   | protein_coding | 67,40 | 0 |
| ENSG00000250510 | GPR162    | 12 | 6821545   | 6829972   | protein_coding | 67,40 | 0 |
| ENSG00000133135 | RNF128    | X  | 106693794 | 106796993 | protein_coding | 67,40 | 0 |
| ENSG00000164403 | SHROOM1   | 5  | 132822141 | 132830898 | protein_coding | 67,39 | 0 |
| ENSG00000163069 | SGCB      | 4  | 52020706  | 52038482  | protein_coding | 67,39 | 0 |
| ENSG00000184205 | TSPYL2    | X  | 53082367  | 53088540  | protein_coding | 67,36 | 0 |

|                 |            |    |           |           |                |       |   |
|-----------------|------------|----|-----------|-----------|----------------|-------|---|
| ENSG00000171204 | TMEM126B   | 11 | 85628573  | 85636539  | protein_coding | 67,35 | 0 |
| ENSG00000077454 | LRCH4      | 7  | 100574011 | 100586153 | protein_coding | 67,32 | 0 |
| ENSG00000114646 | CSPG5      | 3  | 47562239  | 47580792  | protein_coding | 67,30 | 0 |
| ENSG00000079385 | CEACAM1    | 19 | 42507304  | 42561234  | protein_coding | 67,20 | 0 |
| ENSG00000069998 | CECR5      | 22 | 17137511  | 17165287  | protein_coding | 67,15 | 0 |
| ENSG00000162819 | BROX       | 1  | 222712553 | 222735196 | protein_coding | 67,13 | 0 |
| ENSG00000264324 | ENSG000002 | 2  | 74211604  | 74363377  | protein_coding | 67,08 | 0 |
| ENSG00000204576 | PRR3       | 6  | 30556886  | 30563723  | protein_coding | 67,04 | 0 |
| ENSG00000104687 | GSR        | 8  | 30678061  | 30727926  | protein_coding | 66,97 | 0 |
| ENSG00000162694 | EXTL2      | 1  | 100872372 | 100895998 | protein_coding | 66,95 | 0 |
| ENSG00000109089 | CDR2L      | 17 | 74987632  | 75005800  | protein_coding | 66,94 | 0 |
| ENSG00000204252 | HLA-DOA    | 6  | 33004178  | 33009612  | protein_coding | 66,90 | 0 |
| ENSG00000101460 | MAP1LC3A   | 20 | 34546854  | 34560345  | protein_coding | 66,87 | 0 |
| ENSG00000188706 | ZDHHC9     | X  | 129803288 | 129843909 | protein_coding | 66,86 | 0 |
| ENSG00000141873 | SLC39A3    | 19 | 2732204   | 2740152   | protein_coding | 66,83 | 0 |
| ENSG00000173227 | SYT12      | 11 | 67006778  | 67050863  | protein_coding | 66,70 | 0 |
| ENSG00000110811 | P3H3       | 12 | 6828410   | 6839851   | protein_coding | 66,60 | 0 |
| ENSG00000147437 | GNRH1      | 8  | 25419260  | 25424654  | protein_coding | 66,60 | 0 |
| ENSG00000162944 | RFTN2      | 2  | 197568224 | 197676045 | protein_coding | 66,60 | 0 |
| ENSG00000185627 | PSMD13     | 11 | 236546    | 252984    | protein_coding | 66,58 | 0 |
| ENSG00000154822 | PLCL2      | 3  | 16802651  | 17090594  | protein_coding | 66,57 | 0 |
| ENSG00000187630 | DHRS4L2    | 14 | 23969874  | 24006408  | protein_coding | 66,50 | 0 |
| ENSG00000133111 | RFXPAP     | 13 | 36819224  | 36829104  | protein_coding | 66,50 | 0 |
| ENSG00000130638 | ATXN10     | 22 | 45671798  | 45845307  | protein_coding | 66,45 | 0 |
| ENSG00000256537 | SMIM10L1   | 12 | 11171222  | 11176016  | protein_coding | 66,45 | 0 |
| ENSG00000152229 | PSTPIP2    | 18 | 45983536  | 46072272  | protein_coding | 66,43 | 0 |
| ENSG00000167323 | STIM1      | 11 | 3854527   | 4093210   | protein_coding | 66,42 | 0 |
| ENSG00000162373 | BEND5      | 1  | 48727523  | 48776969  | protein_coding | 66,40 | 0 |
| ENSG00000142459 | EVI5L      | 19 | 7830233   | 7864976   | protein_coding | 66,38 | 0 |
| ENSG00000167792 | NDUFV1     | 11 | 67606852  | 67612535  | protein_coding | 66,35 | 0 |
| ENSG00000074964 | ARHGEF10L  | 1  | 17539835  | 17697874  | protein_coding | 66,33 | 0 |
| ENSG00000158352 | SHROOM4    | X  | 50591647  | 50814302  | protein_coding | 66,33 | 0 |
| ENSG00000090104 | RGS1       | 1  | 192575727 | 192580031 | protein_coding | 66,30 | 0 |
| ENSG00000145623 | OSMR       | 5  | 38845858  | 38945596  | protein_coding | 66,26 | 0 |
| ENSG00000111481 | COPZ1      | 12 | 54301202  | 54351849  | protein_coding | 66,21 | 0 |
| ENSG00000198429 | ZNF69      | 19 | 11887784  | 11914329  | protein_coding | 66,20 | 0 |
| ENSG00000198431 | TXNRD1     | 12 | 104215779 | 104350305 | protein_coding | 66,18 | 0 |
| ENSG00000068305 | MEF2A      | 15 | 99565417  | 99716466  | protein_coding | 66,08 | 0 |
| ENSG00000197150 | ABCB8      | 7  | 151028422 | 151047782 | protein_coding | 66,04 | 0 |
| ENSG00000155729 | KCTD18     | 2  | 200488952 | 200519784 | protein_coding | 65,91 | 0 |
| ENSG00000147459 | DOCK5      | 8  | 25184723  | 25418082  | protein_coding | 65,91 | 0 |
| ENSG00000164548 | TRA2A      | 7  | 23504780  | 23532041  | protein_coding | 65,89 | 0 |
| ENSG00000197965 | MPZL1      | 1  | 167721192 | 167791919 | protein_coding | 65,81 | 0 |
| ENSG00000124766 | SOX4       | 6  | 21592769  | 21598619  | protein_coding | 65,80 | 0 |
| ENSG00000165300 | SLITRK5    | 13 | 87672615  | 87696272  | protein_coding | 65,80 | 0 |
| ENSG00000168071 | CCDC88B    | 11 | 64340223  | 64357534  | protein_coding | 65,80 | 0 |
| ENSG00000178896 | EXOSC4     | 8  | 144078626 | 144080647 | protein_coding | 65,80 | 0 |
| ENSG00000117592 | PRDX6      | 1  | 173477266 | 173488807 | protein_coding | 65,79 | 0 |
| ENSG00000173465 | SSCA1      | 11 | 65570430  | 65573942  | protein_coding | 65,67 | 0 |
| ENSG00000187713 | TMEM203    | 9  | 137204082 | 137205638 | protein_coding | 65,62 | 0 |
| ENSG00000172322 | CLEC12A    | 12 | 9951316   | 9995694   | protein_coding | 65,60 | 0 |
| ENSG00000205085 | FAM71F2    | 7  | 128672288 | 128687872 | protein_coding | 65,60 | 0 |
| ENSG00000240694 | PNMA2      | 8  | 26504686  | 26514092  | protein_coding | 65,58 | 0 |
| ENSG00000168288 | MMADHC     | 2  | 149569634 | 149587816 | protein_coding | 65,57 | 0 |
| ENSG00000117480 | FAAH       | 1  | 46394265  | 46413848  | protein_coding | 65,53 | 0 |
| ENSG00000258947 | TUBB3      | 16 | 89921392  | 89938761  | protein_coding | 65,50 | 0 |
| ENSG00000075407 | ZNF37A     | 10 | 38094336  | 38125544  | protein_coding | 65,39 | 0 |
| ENSG00000164691 | TAGAP      | 6  | 159034468 | 159045152 | protein_coding | 65,36 | 0 |

|                 |          |    |           |           |                |       |   |
|-----------------|----------|----|-----------|-----------|----------------|-------|---|
| ENSG00000149218 | ENDOD1   | 11 | 95089810  | 95132645  | protein_coding | 65,33 | 0 |
| ENSG00000167748 | KLK1     | 19 | 50819148  | 50823787  | protein_coding | 65,30 | 0 |
| ENSG00000105705 | SUGP1    | 19 | 19276018  | 19320844  | protein_coding | 65,30 | 0 |
| ENSG00000127526 | SLC35E1  | 19 | 16549831  | 16572382  | protein_coding | 65,29 | 0 |
| ENSG00000172469 | MANEA    | 6  | 95577543  | 95609457  | protein_coding | 65,23 | 0 |
| ENSG00000276293 | PIP4K2B  | 17 | 38765689  | 38800126  | protein_coding | 65,21 | 0 |
| ENSG00000155629 | PIK3AP1  | 10 | 96593312  | 96720514  | protein_coding | 65,19 | 0 |
| ENSG00000181409 | AATK     | 17 | 81117295  | 81166077  | protein_coding | 65,06 | 0 |
| ENSG00000101972 | STAG2    | X  | 123960212 | 124422664 | protein_coding | 65,03 | 0 |
| ENSG00000180626 | ZNF594   | 17 | 5179536   | 5191883   | protein_coding | 64,97 | 0 |
| ENSG00000175414 | ARL10    | 5  | 176365468 | 176401865 | protein_coding | 64,86 | 0 |
| ENSG00000198715 | GLMP     | 1  | 156290089 | 156295689 | protein_coding | 64,79 | 0 |
| ENSG00000150627 | WDR17    | 4  | 176065834 | 176182818 | protein_coding | 64,73 | 0 |
| ENSG00000179841 | AKAP5    | 14 | 64465499  | 64474503  | protein_coding | 64,70 | 0 |
| ENSG00000160999 | SH2B2    | 7  | 102285091 | 102321711 | protein_coding | 64,60 | 0 |
| ENSG00000178498 | DTX3     | 12 | 57604622  | 57609804  | protein_coding | 64,59 | 0 |
| ENSG00000182957 | SPATA13  | 13 | 23979805  | 24307074  | protein_coding | 64,58 | 0 |
| ENSG00000148057 | IDNK     | 9  | 83623049  | 83644130  | protein_coding | 64,54 | 0 |
| ENSG00000127554 | GFER     | 16 | 1984207   | 1987749   | protein_coding | 64,41 | 0 |
| ENSG00000067177 | PHKA1    | X  | 72578814  | 72714319  | protein_coding | 64,40 | 0 |
| ENSG00000133101 | CCNA1    | 13 | 36431520  | 36442882  | protein_coding | 64,35 | 0 |
| ENSG00000196296 | ATP2A1   | 16 | 28878405  | 28904509  | protein_coding | 64,29 | 0 |
| ENSG00000261221 | ZNF865   | 19 | 55605405  | 55617269  | protein_coding | 64,28 | 0 |
| ENSG00000111786 | SRSF9    | 12 | 120461668 | 120469793 | protein_coding | 64,26 | 0 |
| ENSG00000110077 | MS4A6A   | 11 | 60172014  | 60184666  | protein_coding | 64,20 | 0 |
| ENSG00000130844 | ZNF331   | 19 | 53520981  | 53580269  | protein_coding | 64,17 | 0 |
| ENSG00000213214 | ARHGEF35 | 7  | 144186083 | 144195655 | protein_coding | 64,00 | 0 |
| ENSG00000188163 | FAM166A  | 9  | 137243584 | 137247770 | protein_coding | 63,78 | 0 |
| ENSG00000100147 | CCDC134  | 22 | 41800679  | 41826299  | protein_coding | 63,77 | 0 |
| ENSG00000221886 | ZBED8    | 5  | 160393148 | 160400097 | protein_coding | 63,70 | 0 |
| ENSG00000172986 | GXYLT2   | 3  | 72888073  | 72998138  | protein_coding | 63,66 | 0 |
| ENSG00000128891 | C15orf57 | 15 | 40528683  | 40565057  | protein_coding | 63,62 | 0 |
| ENSG00000143125 | PROK1    | 1  | 110451200 | 110457354 | protein_coding | 63,50 | 0 |
| ENSG00000188636 | LDOC1L   | 22 | 44492572  | 44498298  | protein_coding | 63,44 | 0 |
| ENSG00000100422 | CERK     | 22 | 46684411  | 46738261  | protein_coding | 63,41 | 0 |
| ENSG00000156510 | HKDC1    | 10 | 69220303  | 69267559  | protein_coding | 63,40 | 0 |
| ENSG00000142627 | EPHA2    | 1  | 16124337  | 16156087  | protein_coding | 63,36 | 0 |
| ENSG00000159588 | CCDC17   | 1  | 45620044  | 45624057  | protein_coding | 63,30 | 0 |
| ENSG00000107614 | TRDMT1   | 10 | 17142254  | 17202054  | protein_coding | 63,26 | 0 |
| ENSG00000226784 | PGAM4    | X  | 77968874  | 77969638  | protein_coding | 63,20 | 0 |
| ENSG00000175984 | DENND2C  | 1  | 114582848 | 114670422 | protein_coding | 63,18 | 0 |
| ENSG00000137522 | RNF121   | 11 | 71928701  | 71997597  | protein_coding | 63,14 | 0 |
| ENSG00000122515 | ZMIZ2    | 7  | 44748581  | 44769881  | protein_coding | 63,07 | 0 |
| ENSG00000141569 | TRIM65   | 17 | 75880335  | 75897003  | protein_coding | 63,00 | 0 |
| ENSG00000150782 | IL18     | 11 | 112143251 | 112164117 | protein_coding | 63,00 | 0 |
| ENSG00000135378 | PRRG4    | 11 | 32829943  | 32858123  | protein_coding | 62,94 | 0 |
| ENSG00000152475 | ZNF837   | 19 | 58367618  | 58381060  | protein_coding | 62,80 | 0 |
| ENSG00000130830 | MPP1     | X  | 154778684 | 154821007 | protein_coding | 62,77 | 0 |
| ENSG00000124786 | SLC35B3  | 6  | 8413068   | 8435483   | protein_coding | 62,74 | 0 |
| ENSG00000186687 | LYRM7    | 5  | 131170810 | 131205426 | protein_coding | 62,73 | 0 |
| ENSG00000263528 | IKBKE    | 1  | 206470476 | 206496889 | protein_coding | 62,73 | 0 |
| ENSG00000172071 | EIF2AK3  | 2  | 88556741  | 88627576  | protein_coding | 62,71 | 0 |
| ENSG00000178878 | APOLD1   | 12 | 12725917  | 12829975  | protein_coding | 62,70 | 0 |
| ENSG00000116774 | OLFML3   | 1  | 113979391 | 114035572 | protein_coding | 62,70 | 0 |
| ENSG00000150961 | SEC24D   | 4  | 118722823 | 118838683 | protein_coding | 62,67 | 0 |
| ENSG00000132640 | BTBD3    | 20 | 11890723  | 11926609  | protein_coding | 62,65 | 0 |
| ENSG00000106546 | AHR      | 7  | 17298622  | 17346152  | protein_coding | 62,64 | 0 |
| ENSG00000168502 | MTCL1    | 18 | 8705661   | 8832778   | protein_coding | 62,61 | 0 |



|                 |          |    |           |           |                |       |   |
|-----------------|----------|----|-----------|-----------|----------------|-------|---|
| ENSG00000178573 | MAF      | 16 | 79585843  | 79600714  | protein_coding | 62,58 | 0 |
| ENSG00000162004 | CCDC78   | 16 | 722582    | 726954    | protein_coding | 62,50 | 0 |
| ENSG00000065615 | CYB5R4   | 6  | 83859643  | 83967424  | protein_coding | 62,48 | 0 |
| ENSG00000008300 | CELSR3   | 3  | 48636469  | 48662915  | protein_coding | 62,46 | 0 |
| ENSG00000134627 | PIWIL4   | 11 | 94543840  | 94621421  | protein_coding | 62,40 | 0 |
| ENSG00000160867 | FGFR4    | 5  | 177086886 | 177098144 | protein_coding | 62,27 | 0 |
| ENSG00000088451 | TGDS     | 13 | 94574051  | 94596257  | protein_coding | 62,14 | 0 |
| ENSG00000198393 | ZNF26    | 12 | 132986365 | 133032952 | protein_coding | 62,14 | 0 |
| ENSG00000105662 | CRTC1    | 19 | 18683677  | 18782333  | protein_coding | 62,13 | 0 |
| ENSG00000197102 | DYNC1H1  | 14 | 101964528 | 102050792 | protein_coding | 62,13 | 0 |
| ENSG00000137672 | TRPC6    | 11 | 101451564 | 101872562 | protein_coding | 62,07 | 0 |
| ENSG00000110057 | UNC93B1  | 11 | 67991104  | 68004982  | protein_coding | 61,97 | 0 |
| ENSG00000114268 | PFKFB4   | 3  | 48517684  | 48562015  | protein_coding | 61,92 | 0 |
| ENSG00000148175 | STOM     | 9  | 121338988 | 121370304 | protein_coding | 61,91 | 0 |
| ENSG00000119718 | EIF2B2   | 14 | 75002911  | 75012366  | protein_coding | 61,83 | 0 |
| ENSG00000007314 | SCN4A    | 17 | 63938554  | 63972918  | protein_coding | 61,80 | 0 |
| ENSG00000187607 | ZNF286A  | 17 | 15699577  | 15720787  | protein_coding | 61,80 | 0 |
| ENSG00000133895 | MEN1     | 11 | 64803510  | 64811294  | protein_coding | 61,80 | 0 |
| ENSG00000196498 | NCOR2    | 12 | 124324415 | 124567589 | protein_coding | 61,79 | 0 |
| ENSG00000156966 | B3GNT7   | 2  | 231395543 | 231401164 | protein_coding | 61,75 | 0 |
| ENSG00000167434 | CA4      | 17 | 60149936  | 60170899  | protein_coding | 61,70 | 0 |
| ENSG00000158691 | ZSCAN12  | 6  | 28378955  | 28399734  | protein_coding | 61,64 | 0 |
| ENSG00000155366 | RHOC     | 1  | 112701106 | 112707434 | protein_coding | 61,56 | 0 |
| ENSG00000100902 | PSMA6    | 14 | 35278633  | 35317493  | protein_coding | 61,55 | 0 |
| ENSG00000141644 | MBD1     | 18 | 50266882  | 50281774  | protein_coding | 61,53 | 0 |
| ENSG00000181617 | FDCSP    | 4  | 70226071  | 70235252  | protein_coding | 61,50 | 0 |
| ENSG00000092969 | TGFB2    | 1  | 218346235 | 218444619 | protein_coding | 61,50 | 0 |
| ENSG00000166436 | TRIM66   | 11 | 8612037   | 8671866   | protein_coding | 61,45 | 0 |
| ENSG00000134245 | WNT2B    | 1  | 112466541 | 112530165 | protein_coding | 61,42 | 0 |
| ENSG00000174125 | TLR1     | 4  | 38790677  | 38856817  | protein_coding | 61,40 | 0 |
| ENSG00000189337 | KAZN     | 1  | 14598704  | 15118043  | protein_coding | 61,40 | 0 |
| ENSG00000123384 | LRP1     | 12 | 57128493  | 57213351  | protein_coding | 61,37 | 0 |
| ENSG00000134363 | FST      | 5  | 53480409  | 53487134  | protein_coding | 61,34 | 0 |
| ENSG00000166716 | ZNF592   | 15 | 84748635  | 84806432  | protein_coding | 61,33 | 0 |
| ENSG00000135919 | SERPINE2 | 2  | 223975112 | 224039319 | protein_coding | 61,31 | 0 |
| ENSG00000133433 | GSTT2B   | 22 | 23957414  | 23961186  | protein_coding | 61,20 | 0 |
| ENSG00000137285 | TUBB2B   | 6  | 3224261   | 3231730   | protein_coding | 61,20 | 0 |
| ENSG00000147383 | NSDHL    | X  | 152830967 | 152869729 | protein_coding | 61,11 | 0 |
| ENSG00000197935 | ZNF311   | 6  | 28994785  | 29005316  | protein_coding | 61,10 | 0 |
| ENSG00000099864 | PALM     | 19 | 708939    | 748329    | protein_coding | 61,09 | 0 |
| ENSG00000117906 | RCN2     | 15 | 76931619  | 76954392  | protein_coding | 61,05 | 0 |
| ENSG00000126218 | F10      | 13 | 113122814 | 113149529 | protein_coding | 61,00 | 0 |
| ENSG00000129255 | MPDU1    | 17 | 7583529   | 7592789   | protein_coding | 60,98 | 0 |
| ENSG00000186767 | SPIN4    | X  | 63347228  | 63351344  | protein_coding | 60,70 | 0 |
| ENSG00000108826 | MRPL27   | 17 | 50367857  | 50373214  | protein_coding | 60,67 | 0 |
| ENSG00000114626 | ABTB1    | 3  | 127672935 | 127680920 | protein_coding | 60,65 | 0 |
| ENSG00000087074 | PPP1R15A | 19 | 48872392  | 48876057  | protein_coding | 60,58 | 0 |
| ENSG00000127922 | SHFM1    | 7  | 96481626  | 96709891  | protein_coding | 60,52 | 0 |
| ENSG00000175206 | NPPA     | 1  | 11845709  | 11848345  | protein_coding | 60,50 | 0 |
| ENSG00000113248 | PCDHB15  | 5  | 141245349 | 141249365 | protein_coding | 60,40 | 0 |
| ENSG00000172819 | RARG     | 12 | 53210567  | 53232980  | protein_coding | 60,10 | 0 |
| ENSG00000118257 | NRP2     | 2  | 205681990 | 205798133 | protein_coding | 60,06 | 0 |
| ENSG00000144589 | STK11IP  | 2  | 219597860 | 219616451 | protein_coding | 59,95 | 0 |
| ENSG00000142694 | EVA1B    | 1  | 36322031  | 36324154  | protein_coding | 59,92 | 0 |
| ENSG00000144120 | TMEM177  | 2  | 119679167 | 119686507 | protein_coding | 59,90 | 0 |
| ENSG00000110442 | COMMD9   | 11 | 36269284  | 36289449  | protein_coding | 59,89 | 0 |
| ENSG00000103202 | NME4     | 16 | 396725    | 410367    | protein_coding | 59,85 | 0 |
| ENSG00000104892 | KLC3     | 19 | 45333434  | 45351520  | protein_coding | 59,79 | 0 |

|                 |          |    |           |           |                |       |   |
|-----------------|----------|----|-----------|-----------|----------------|-------|---|
| ENSG00000133561 | GIMAP6   | 7  | 150625375 | 150632648 | protein_coding | 59,70 | 0 |
| ENSG00000104885 | DOT1L    | 19 | 2164149   | 2232578   | protein_coding | 59,65 | 0 |
| ENSG00000145337 | PYURF    | 4  | 88520985  | 88523813  | protein_coding | 59,63 | 0 |
| ENSG00000135624 | CCT7     | 2  | 73233420  | 73253021  | protein_coding | 59,62 | 0 |
| ENSG00000164976 | KIAA1161 | 9  | 34366670  | 34376853  | protein_coding | 59,62 | 0 |
| ENSG00000174989 | FBXW8    | 12 | 116910956 | 117031148 | protein_coding | 59,58 | 0 |
| ENSG00000111358 | GTF2H3   | 12 | 123633739 | 123662606 | protein_coding | 59,57 | 0 |
| ENSG00000204366 | ZBTB12   | 6  | 31899607  | 31901992  | protein_coding | 59,53 | 0 |
| ENSG00000099957 | P2RX6    | 22 | 21009808  | 21028830  | protein_coding | 59,50 | 0 |
| ENSG00000100979 | PLTP     | 20 | 45898621  | 45912155  | protein_coding | 59,46 | 0 |
| ENSG00000168734 | PKIG     | 20 | 44531785  | 44624247  | protein_coding | 59,42 | 0 |
| ENSG00000178950 | GAK      | 4  | 849276    | 932373    | protein_coding | 59,34 | 0 |
| ENSG00000160678 | S100A1   | 1  | 153627926 | 153632039 | protein_coding | 59,30 | 0 |
| ENSG00000164708 | PGAM2    | 7  | 44062727  | 44065587  | protein_coding | 59,25 | 0 |
| ENSG00000198933 | TBKBP1   | 17 | 47694081  | 47712050  | protein_coding | 59,24 | 0 |
| ENSG00000160953 | MUM1     | 19 | 1285893   | 1378431   | protein_coding | 59,21 | 0 |
| ENSG00000181523 | SGSH     | 17 | 80206716  | 80220923  | protein_coding | 59,09 | 0 |
| ENSG00000100068 | LRP5L    | 22 | 25351418  | 25405377  | protein_coding | 59,00 | 0 |
| ENSG00000127081 | ZNF484   | 9  | 92845031  | 92878038  | protein_coding | 58,96 | 0 |
| ENSG00000136156 | ITM2B    | 13 | 48233158  | 48270357  | protein_coding | 58,83 | 0 |
| ENSG00000116521 | SCAMP3   | 1  | 155255979 | 155262430 | protein_coding | 58,82 | 0 |
| ENSG00000137825 | ITPKA    | 15 | 41493393  | 41503551  | protein_coding | 58,80 | 0 |
| ENSG00000183020 | AP2A2    | 11 | 924894    | 1012245   | protein_coding | 58,61 | 0 |
| ENSG00000011638 | TMEM159  | 16 | 21158377  | 21180616  | protein_coding | 58,61 | 0 |
| ENSG00000175224 | ATG13    | 11 | 46617527  | 46674818  | protein_coding | 58,60 | 0 |
| ENSG00000131459 | GFPT2    | 5  | 180300690 | 180353387 | protein_coding | 58,51 | 0 |
| ENSG00000085998 | POMGNT1  | 1  | 46188682  | 46220305  | protein_coding | 58,50 | 0 |
| ENSG00000112308 | C6orf62  | 6  | 24704861  | 24720836  | protein_coding | 58,48 | 0 |
| ENSG00000122779 | TRIM24   | 7  | 138460334 | 138589993 | protein_coding | 58,45 | 0 |
| ENSG00000106263 | EIF3B    | 7  | 2354086   | 2380745   | protein_coding | 58,45 | 0 |
| ENSG00000163162 | RNF149   | 2  | 101271219 | 101308701 | protein_coding | 58,45 | 0 |
| ENSG00000155158 | TTC39B   | 9  | 15163622  | 15307360  | protein_coding | 58,41 | 0 |
| ENSG00000235568 | NFAM1    | 22 | 42380410  | 42432395  | protein_coding | 58,33 | 0 |
| ENSG00000160111 | CPAMD8   | 19 | 16892947  | 17026815  | protein_coding | 58,30 | 0 |
| ENSG00000239382 | ALKBH6   | 19 | 36009120  | 36014239  | protein_coding | 58,30 | 0 |
| ENSG00000095380 | NANS     | 9  | 98056739  | 98083075  | protein_coding | 58,30 | 0 |
| ENSG00000168237 | GLYCTK   | 3  | 52287089  | 52293476  | protein_coding | 58,26 | 0 |
| ENSG00000160209 | PDXK     | 21 | 43719094  | 43762307  | protein_coding | 58,17 | 0 |
| ENSG00000121297 | TSHZ3    | 19 | 31274945  | 31349547  | protein_coding | 58,11 | 0 |
| ENSG00000105472 | CLEC11A  | 19 | 50723329  | 50725718  | protein_coding | 58,10 | 0 |
| ENSG00000137207 | YIPF3    | 6  | 43511827  | 43516990  | protein_coding | 58,09 | 0 |
| ENSG00000186417 | GLDN     | 15 | 51341629  | 51408013  | protein_coding | 58,07 | 0 |
| ENSG00000175556 | LONRF3   | X  | 118974614 | 119018355 | protein_coding | 58,00 | 0 |
| ENSG00000125148 | MT2A     | 16 | 56608199  | 56609497  | protein_coding | 57,93 | 0 |
| ENSG00000068885 | IFT80    | 3  | 160256986 | 160399880 | protein_coding | 57,90 | 0 |
| ENSG00000253305 | PCDHGB6  | 5  | 141408021 | 141512979 | protein_coding | 57,90 | 0 |
| ENSG00000189319 | FAM53B   | 10 | 124619292 | 124744269 | protein_coding | 57,89 | 0 |
| ENSG00000069493 | CLEC2D   | 12 | 9664969   | 9699555   | protein_coding | 57,86 | 0 |
| ENSG00000106333 | PCOLCE   | 7  | 100602177 | 100608175 | protein_coding | 57,80 | 0 |
| ENSG00000138100 | TRIM54   | 2  | 27282392  | 27307439  | protein_coding | 57,80 | 0 |
| ENSG00000106823 | ECM2     | 9  | 92493554  | 92536655  | protein_coding | 57,77 | 0 |
| ENSG00000105088 | OLFM2    | 19 | 9853718   | 9936552   | protein_coding | 57,71 | 0 |
| ENSG00000104907 | TRMT1    | 19 | 13104902  | 13117567  | protein_coding | 57,71 | 0 |
| ENSG00000131389 | SLC6A6   | 3  | 14402576  | 14489349  | protein_coding | 57,71 | 0 |
| ENSG00000182890 | GLUD2    | X  | 121047588 | 121050080 | protein_coding | 57,67 | 0 |
| ENSG00000173599 | PC       | 11 | 66848233  | 66958376  | protein_coding | 57,61 | 0 |
| ENSG00000132507 | EIF5A    | 17 | 7306999   | 7312463   | protein_coding | 57,61 | 0 |
| ENSG00000113790 | EHHADH   | 3  | 185190624 | 185281990 | protein_coding | 57,60 | 0 |

|                 |            |    |           |           |                |       |   |
|-----------------|------------|----|-----------|-----------|----------------|-------|---|
| ENSG00000123570 | RAB9B      | X  | 103822322 | 103832228 | protein_coding | 57,60 | 0 |
| ENSG00000064225 | ST3GAL6    | 3  | 98732236  | 98821201  | protein_coding | 57,57 | 0 |
| ENSG00000008441 | NFIX       | 19 | 12995608  | 13098796  | protein_coding | 57,52 | 0 |
| ENSG00000130724 | CHMP2A     | 19 | 58551566  | 58555124  | protein_coding | 57,51 | 0 |
| ENSG00000171097 | CCBL1      | 9  | 128832942 | 128882494 | protein_coding | 57,42 | 0 |
| ENSG00000165905 | GYLTL1B    | 11 | 45921621  | 45929096  | protein_coding | 57,40 | 0 |
| ENSG00000215193 | PEX26      | 22 | 18077920  | 18131138  | protein_coding | 57,34 | 0 |
| ENSG00000143494 | VASH2      | 1  | 212950520 | 212992037 | protein_coding | 57,33 | 0 |
| ENSG00000174130 | TLR6       | 4  | 38823715  | 38856817  | protein_coding | 57,30 | 0 |
| ENSG00000171189 | GRIK1      | 21 | 29536933  | 29940033  | protein_coding | 57,18 | 0 |
| ENSG00000151617 | EDNRA      | 4  | 147480917 | 147544954 | protein_coding | 57,08 | 0 |
| ENSG00000101333 | PLCB4      | 20 | 9068763   | 9481242   | protein_coding | 56,91 | 0 |
| ENSG00000164530 | PI16       | 6  | 36948263  | 36964837  | protein_coding | 56,90 | 0 |
| ENSG00000109758 | HGFAC      | 4  | 3441887   | 3449495   | protein_coding | 56,90 | 0 |
| ENSG00000154229 | PRKCA      | 17 | 66302636  | 66810743  | protein_coding | 56,89 | 0 |
| ENSG00000041988 | THAP3      | 1  | 6624866   | 6635586   | protein_coding | 56,88 | 0 |
| ENSG00000107262 | BAG1       | 9  | 33247820  | 33264761  | protein_coding | 56,87 | 0 |
| ENSG00000213420 | GPC2       | 7  | 100169606 | 100177372 | protein_coding | 56,86 | 0 |
| ENSG00000126882 | FAM78A     | 9  | 131258076 | 131276547 | protein_coding | 56,76 | 0 |
| ENSG00000050130 | JKAMP      | 14 | 59484443  | 59505410  | protein_coding | 56,75 | 0 |
| ENSG00000099889 | ARVCF      | 22 | 19969896  | 20016808  | protein_coding | 56,71 | 0 |
| ENSG00000125826 | RBCK1      | 20 | 407498    | 430966    | protein_coding | 56,65 | 0 |
| ENSG00000072840 | EVC        | 4  | 5711197   | 5814305   | protein_coding | 56,64 | 0 |
| ENSG00000104142 | VPS18      | 15 | 40894430  | 40903975  | protein_coding | 56,64 | 0 |
| ENSG00000010030 | ETV7       | 6  | 36354091  | 36387800  | protein_coding | 56,60 | 0 |
| ENSG00000123240 | OPTN       | 10 | 13099449  | 13138308  | protein_coding | 56,55 | 0 |
| ENSG00000162194 | LBHD1      | 11 | 62662817  | 62672255  | protein_coding | 56,51 | 0 |
| ENSG00000117036 | ETV3       | 1  | 157121191 | 157138474 | protein_coding | 56,50 | 0 |
| ENSG00000107317 | PTGDS      | 9  | 136977505 | 136985435 | protein_coding | 56,50 | 0 |
| ENSG00000155666 | KDM8       | 16 | 27203495  | 27221768  | protein_coding | 56,44 | 0 |
| ENSG00000162148 | PPP1R32    | 11 | 61481120  | 61490931  | protein_coding | 56,40 | 0 |
| ENSG00000135679 | MDM2       | 12 | 68808172  | 68850686  | protein_coding | 56,36 | 0 |
| ENSG00000176428 | VPS37D     | 7  | 73667825  | 73672112  | protein_coding | 56,30 | 0 |
| ENSG00000213638 | ADAT3      | 19 | 1905378   | 1913447   | protein_coding | 56,20 | 0 |
| ENSG00000135454 | B4GALNT1   | 12 | 57623410  | 57633355  | protein_coding | 56,20 | 0 |
| ENSG00000163832 | ELP6       | 3  | 47495640  | 47513761  | protein_coding | 56,17 | 0 |
| ENSG00000185745 | IFIT1      | 10 | 89392546  | 89406486  | protein_coding | 56,10 | 0 |
| ENSG00000115598 | IL1RL2     | 2  | 102186973 | 102240002 | protein_coding | 56,00 | 0 |
| ENSG00000181004 | BBS12      | 4  | 122732702 | 122744943 | protein_coding | 55,98 | 0 |
| ENSG00000185730 | ZNF696     | 8  | 143289676 | 143298061 | protein_coding | 55,92 | 0 |
| ENSG00000123572 | NRK        | X  | 105822543 | 105958610 | protein_coding | 55,81 | 0 |
| ENSG00000027869 | SH2D2A     | 1  | 156806243 | 156816862 | protein_coding | 55,70 | 0 |
| ENSG00000138823 | MTTP       | 4  | 99563761  | 99623999  | protein_coding | 55,68 | 0 |
| ENSG00000173992 | CCS        | 11 | 66592821  | 66606019  | protein_coding | 55,66 | 0 |
| ENSG00000139318 | DUSP6      | 12 | 89347232  | 89353271  | protein_coding | 55,60 | 0 |
| ENSG00000119537 | KDSR       | 18 | 63327726  | 63367510  | protein_coding | 55,57 | 0 |
| ENSG00000141428 | C18orf21   | 18 | 35972083  | 35979286  | protein_coding | 55,51 | 0 |
| ENSG00000112992 | NNT        | 5  | 43602692  | 43707405  | protein_coding | 55,49 | 0 |
| ENSG00000247595 | SPTY2D1-AS | 11 | 18599787  | 18610255  | protein_coding | 55,41 | 0 |
| ENSG00000099985 | OSM        | 22 | 30262829  | 30266840  | protein_coding | 55,40 | 0 |
| ENSG00000167895 | TMC8       | 17 | 78130770  | 78142968  | protein_coding | 55,40 | 0 |
| ENSG00000162711 | NLRP3      | 1  | 247416156 | 247449108 | protein_coding | 55,40 | 0 |
| ENSG00000089820 | ARHGAP4    | X  | 153907367 | 153934999 | protein_coding | 55,39 | 0 |
| ENSG00000125459 | MSTO1      | 1  | 155610205 | 155614967 | protein_coding | 55,38 | 0 |
| ENSG00000004660 | CAMKK1     | 17 | 3860315   | 3894891   | protein_coding | 55,21 | 0 |
| ENSG00000144504 | ANKMY1     | 2  | 240479422 | 240569209 | protein_coding | 55,17 | 0 |
| ENSG00000116863 | ADPRHL2    | 1  | 36088875  | 36093932  | protein_coding | 55,13 | 0 |
| ENSG00000170092 | SPDYE5     | 7  | 75493625  | 75504304  | protein_coding | 55,10 | 0 |

|                 |          |    |           |           |                |       |   |
|-----------------|----------|----|-----------|-----------|----------------|-------|---|
| ENSG00000140718 | FTO      | 16 | 53703963  | 54121941  | protein_coding | 55,08 | 0 |
| ENSG00000197562 | RAB40C   | 16 | 589357    | 629272    | protein_coding | 55,01 | 0 |
| ENSG00000008283 | CYB561   | 17 | 63432304  | 63446378  | protein_coding | 55,00 | 0 |
| ENSG00000074416 | MGLL     | 3  | 127689062 | 127823250 | protein_coding | 55,00 | 0 |
| ENSG00000162909 | CAPN2    | 1  | 223701593 | 223776018 | protein_coding | 54,99 | 0 |
| ENSG00000101608 | MYL12A   | 18 | 3247481   | 3256236   | protein_coding | 54,97 | 0 |
| ENSG00000125827 | TMX4     | 20 | 7977348   | 8019829   | protein_coding | 54,96 | 0 |
| ENSG00000141527 | CARD14   | 17 | 80169992  | 80209331  | protein_coding | 54,95 | 0 |
| ENSG00000144136 | SLC20A1  | 2  | 112645857 | 112663827 | protein_coding | 54,95 | 0 |
| ENSG00000198205 | ZXDA     | X  | 57906708  | 57910820  | protein_coding | 54,90 | 0 |
| ENSG00000161999 | JMJD8    | 16 | 681671    | 684528    | protein_coding | 54,78 | 0 |
| ENSG00000174903 | RAB1B    | 11 | 66268533  | 66277492  | protein_coding | 54,74 | 0 |
| ENSG00000074660 | SCARF1   | 17 | 1633858   | 1645747   | protein_coding | 54,73 | 0 |
| ENSG00000172020 | GAP43    | 3  | 115623324 | 115721490 | protein_coding | 54,70 | 0 |
| ENSG00000068831 | RASGRP2  | 11 | 64726911  | 64745456  | protein_coding | 54,69 | 0 |
| ENSG00000073150 | PANX2    | 22 | 50170731  | 50180294  | protein_coding | 54,50 | 0 |
| ENSG00000132581 | SDF2     | 17 | 28648356  | 28662189  | protein_coding | 54,50 | 0 |
| ENSG00000141750 | STAC2    | 17 | 39210536  | 39225872  | protein_coding | 54,50 | 0 |
| ENSG00000019169 | MARCO    | 2  | 118942166 | 118994660 | protein_coding | 54,50 | 0 |
| ENSG00000138185 | ENTPD1   | 10 | 95711779  | 95869695  | protein_coding | 54,49 | 0 |
| ENSG00000103197 | TSC2     | 16 | 2047465   | 2088720   | protein_coding | 54,46 | 0 |
| ENSG00000078795 | PKD2L2   | 5  | 137887968 | 137942747 | protein_coding | 54,38 | 0 |
| ENSG00000275023 | MLLT6    | 17 | 38705542  | 38729803  | protein_coding | 54,37 | 0 |
| ENSG00000126012 | KDM5C    | X  | 53191321  | 53225422  | protein_coding | 54,37 | 0 |
| ENSG00000239306 | RBM14    | 11 | 66616582  | 66627347  | protein_coding | 54,35 | 0 |
| ENSG00000172824 | CES4A    | 16 | 66988589  | 67009758  | protein_coding | 54,34 | 0 |
| ENSG00000127578 | WFIKKN1  | 16 | 629239    | 634116    | protein_coding | 54,30 | 0 |
| ENSG00000158863 | FAM160B2 | 8  | 22089159  | 22104898  | protein_coding | 54,30 | 0 |
| ENSG00000277363 | SRCIN1   | 17 | 38530016  | 38605930  | protein_coding | 54,29 | 0 |
| ENSG00000120215 | MLANA    | 9  | 5890802   | 5910606   | protein_coding | 54,20 | 0 |
| ENSG00000162398 | LEXM     | 1  | 54806063  | 54842252  | protein_coding | 54,20 | 0 |
| ENSG00000168884 | TNIP2    | 4  | 2741648   | 2756376   | protein_coding | 54,12 | 0 |
| ENSG00000204472 | AIF1     | 6  | 31615184  | 31617021  | protein_coding | 54,10 | 0 |
| ENSG00000124370 | MCEE     | 2  | 71109684  | 71130239  | protein_coding | 54,08 | 0 |
| ENSG00000173852 | DPY19L1  | 7  | 34928876  | 35038271  | protein_coding | 54,03 | 0 |
| ENSG00000090776 | EFNB1    | X  | 68828997  | 68842147  | protein_coding | 54,01 | 0 |
| ENSG00000008838 | MED24    | 17 | 40019097  | 40061215  | protein_coding | 54,00 | 0 |
| ENSG00000204172 | AGAP9    | 10 | 47501854  | 47523638  | protein_coding | 54,00 | 0 |
| ENSG00000253846 | PCDHGA10 | 5  | 141412987 | 141512979 | protein_coding | 54,00 | 0 |
| ENSG00000177700 | POLR2L   | 11 | 837356    | 842545    | protein_coding | 53,99 | 0 |
| ENSG00000127334 | DYRK2    | 12 | 67648338  | 67665406  | protein_coding | 53,99 | 0 |
| ENSG00000108439 | PNPO     | 17 | 47941506  | 47948288  | protein_coding | 53,98 | 0 |
| ENSG00000122026 | RPL21    | 13 | 27251309  | 27256691  | protein_coding | 53,96 | 0 |
| ENSG00000181085 | MAPK15   | 8  | 143716259 | 143722458 | protein_coding | 53,90 | 0 |
| ENSG00000139624 | CERS5    | 12 | 50129306  | 50167533  | protein_coding | 53,84 | 0 |
| ENSG00000196456 | ZNF775   | 7  | 150368790 | 150410597 | protein_coding | 53,84 | 0 |
| ENSG00000184208 | C22orf46 | 22 | 41688939  | 41698136  | protein_coding | 53,83 | 0 |
| ENSG00000112425 | EPM2A    | 6  | 145501583 | 145736024 | protein_coding | 53,81 | 0 |
| ENSG00000277632 | CCL3     | 17 | 36088256  | 36090169  | protein_coding | 53,80 | 0 |
| ENSG00000100522 | GNPNAT1  | 14 | 52775194  | 52791668  | protein_coding | 53,78 | 0 |
| ENSG00000086758 | HUWE1    | X  | 53532096  | 53686729  | protein_coding | 53,77 | 0 |
| ENSG00000133872 | SARAF    | 8  | 30063012  | 30083208  | protein_coding | 53,76 | 0 |
| ENSG00000188112 | C6orf132 | 6  | 42101118  | 42142619  | protein_coding | 53,76 | 0 |
| ENSG00000090661 | CERS4    | 19 | 8206736   | 8262421   | protein_coding | 53,74 | 0 |
| ENSG00000198133 | TMEM229B | 14 | 67447084  | 67533739  | protein_coding | 53,71 | 0 |
| ENSG00000242114 | MTFP1    | 22 | 30425530  | 30429053  | protein_coding | 53,70 | 0 |
| ENSG00000174840 | PDE12    | 3  | 57556276  | 57566844  | protein_coding | 53,68 | 0 |
| ENSG00000015479 | MATR3    | 5  | 139293648 | 139331359 | protein_coding | 53,59 | 0 |

|                 |          |    |           |           |                |       |   |
|-----------------|----------|----|-----------|-----------|----------------|-------|---|
| ENSG0000070669  | ASNS     | 7  | 97852118  | 97872542  | protein_coding | 53,58 | 0 |
| ENSG00000160352 | ZNF714   | 19 | 21082159  | 21125270  | protein_coding | 53,55 | 0 |
| ENSG00000153815 | CMIP     | 16 | 81445170  | 81711762  | protein_coding | 53,52 | 0 |
| ENSG00000161958 | FGF11    | 17 | 7438273   | 7444937   | protein_coding | 53,50 | 0 |
| ENSG00000188315 | C3orf62  | 3  | 49268602  | 49277909  | protein_coding | 53,41 | 0 |
| ENSG00000168159 | RNF187   | 1  | 228487061 | 228495766 | protein_coding | 53,40 | 0 |
| ENSG00000175489 | LRRC25   | 19 | 18391144  | 18397617  | protein_coding | 53,40 | 0 |
| ENSG00000242689 | CNTF     | 11 | 58622673  | 58625733  | protein_coding | 53,40 | 0 |
| ENSG00000168679 | SLC16A4  | 1  | 110362848 | 110391082 | protein_coding | 53,40 | 0 |
| ENSG00000161204 | ABCF3    | 3  | 184186023 | 184194012 | protein_coding | 53,39 | 0 |
| ENSG00000141391 | PRELID3A | 18 | 12407896  | 12432238  | protein_coding | 53,31 | 0 |
| ENSG00000213654 | GPSM3    | 6  | 32190766  | 32195523  | protein_coding | 53,30 | 0 |
| ENSG00000214300 | SPDYE3   | 7  | 100307702 | 100322196 | protein_coding | 53,27 | 0 |
| ENSG00000006007 | GDE1     | 16 | 19501689  | 19522145  | protein_coding | 53,26 | 0 |
| ENSG00000142185 | TRPM2    | 21 | 44350163  | 44443081  | protein_coding | 53,19 | 0 |
| ENSG00000221890 | NPTXR    | 22 | 38818452  | 38843982  | protein_coding | 53,15 | 0 |
| ENSG00000167280 | ENGASE   | 17 | 79074939  | 79088599  | protein_coding | 53,13 | 0 |
| ENSG00000109103 | UNC119   | 17 | 28546707  | 28552668  | protein_coding | 53,11 | 0 |
| ENSG00000166743 | ACSM1    | 16 | 20623237  | 20698890  | protein_coding | 53,10 | 0 |
| ENSG00000148795 | CYP17A1  | 10 | 102830531 | 102837533 | protein_coding | 53,10 | 0 |
| ENSG00000173269 | MMRN2    | 10 | 86935540  | 86969481  | protein_coding | 53,10 | 0 |
| ENSG0000010626  | LRRC23   | 12 | 6873569   | 6914243   | protein_coding | 53,03 | 0 |
| ENSG00000139725 | RHOF     | 12 | 121777754 | 121803403 | protein_coding | 53,03 | 0 |
| ENSG00000117682 | DHDDS    | 1  | 26432282  | 26471294  | protein_coding | 53,01 | 0 |
| ENSG00000155307 | SAMSN1   | 21 | 14485228  | 14583402  | protein_coding | 53,00 | 0 |
| ENSG00000029364 | SLC39A9  | 14 | 69398015  | 69462388  | protein_coding | 52,93 | 0 |
| ENSG00000213339 | QTRT1    | 19 | 10701430  | 10713437  | protein_coding | 52,91 | 0 |
| ENSG00000023228 | NDUFS1   | 2  | 206114817 | 206159603 | protein_coding | 52,89 | 0 |
| ENSG00000184925 | LCN12    | 9  | 136949551 | 136955497 | protein_coding | 52,80 | 0 |
| ENSG00000164107 | HAND2    | 4  | 173524969 | 173530229 | protein_coding | 52,80 | 0 |
| ENSG00000168032 | ENTPD3   | 3  | 40387156  | 40428619  | protein_coding | 52,80 | 0 |
| ENSG00000159210 | SNF8     | 17 | 48929316  | 48945117  | protein_coding | 52,76 | 0 |
| ENSG00000118514 | ALDH8A1  | 6  | 134917390 | 134950122 | protein_coding | 52,70 | 0 |
| ENSG00000171163 | ZNF692   | 1  | 248850006 | 248859144 | protein_coding | 52,67 | 0 |
| ENSG00000126217 | MCF2L    | 13 | 112894378 | 113099739 | protein_coding | 52,67 | 0 |
| ENSG00000087494 | PTHLH    | 12 | 27958084  | 27972705  | protein_coding | 52,66 | 0 |
| ENSG00000138378 | STAT4    | 2  | 191029576 | 191151596 | protein_coding | 52,60 | 0 |
| ENSG00000188004 | C1orf204 | 1  | 159834474 | 159855347 | protein_coding | 52,60 | 0 |
| ENSG00000197568 | HHLA3    | 1  | 70354805  | 70385339  | protein_coding | 52,54 | 0 |
| ENSG00000183914 | DNAH2    | 17 | 7717354   | 7833744   | protein_coding | 52,33 | 0 |
| ENSG00000102804 | TSC22D1  | 13 | 44432143  | 44577147  | protein_coding | 52,22 | 0 |
| ENSG00000111341 | MGP      | 12 | 14881181  | 14885926  | protein_coding | 52,20 | 0 |
| ENSG00000196968 | FUT11    | 10 | 73772291  | 73780251  | protein_coding | 52,20 | 0 |
| ENSG00000104447 | TRPS1    | 8  | 115408496 | 115809673 | protein_coding | 52,20 | 0 |
| ENSG00000277972 | CISD3    | 17 | 38730235  | 38735044  | protein_coding | 52,15 | 0 |
| ENSG00000128268 | MGAT3    | 22 | 39457344  | 39492194  | protein_coding | 52,10 | 0 |
| ENSG00000120645 | IQSEC3   | 12 | 66765     | 178460    | protein_coding | 52,10 | 0 |
| ENSG00000146826 | C7orf43  | 7  | 100154420 | 100158715 | protein_coding | 52,08 | 0 |
| ENSG00000065361 | ERBB3    | 12 | 56079857  | 56103505  | protein_coding | 52,06 | 0 |
| ENSG00000153291 | SLC25A27 | 6  | 46652915  | 46678193  | protein_coding | 52,00 | 0 |
| ENSG00000241404 | EGFL8    | 6  | 32164583  | 32168281  | protein_coding | 52,00 | 0 |
| ENSG00000178623 | GPR35    | 2  | 240605431 | 240631259 | protein_coding | 52,00 | 0 |
| ENSG00000197879 | MYO1C    | 17 | 1464098   | 1492812   | protein_coding | 51,97 | 0 |
| ENSG00000169410 | PTPN9    | 15 | 75463251  | 75579289  | protein_coding | 51,96 | 0 |
| ENSG00000127241 | MASP1    | 3  | 187217285 | 187292022 | protein_coding | 51,91 | 0 |
| ENSG00000196754 | S100A2   | 1  | 153561108 | 153567890 | protein_coding | 51,90 | 0 |
| ENSG00000160685 | ZBTB7B   | 1  | 155002630 | 155018522 | protein_coding | 51,80 | 0 |
| ENSG00000004776 | HSPB6    | 19 | 35754568  | 35758079  | protein_coding | 51,80 | 0 |

|                 |          |    |           |           |                |       |   |
|-----------------|----------|----|-----------|-----------|----------------|-------|---|
| ENSG00000108604 | SMARCD2  | 17 | 63832081  | 63843065  | protein_coding | 51,80 | 0 |
| ENSG00000148834 | GSTO1    | 10 | 104235356 | 104267459 | protein_coding | 51,79 | 0 |
| ENSG00000063322 | MED29    | 19 | 39391303  | 39400637  | protein_coding | 51,77 | 0 |
| ENSG00000067225 | PKM      | 15 | 72199029  | 72231822  | protein_coding | 51,74 | 0 |
| ENSG00000173171 | MTX1     | 1  | 155208699 | 155213824 | protein_coding | 51,71 | 0 |
| ENSG00000035403 | VCL      | 10 | 73995193  | 74121363  | protein_coding | 51,71 | 0 |
| ENSG00000168140 | VASN     | 16 | 4371848   | 4383528   | protein_coding | 51,66 | 0 |
| ENSG00000160741 | CRTC2    | 1  | 153947669 | 153958625 | protein_coding | 51,63 | 0 |
| ENSG00000106560 | GIMAP2   | 7  | 150685697 | 150693641 | protein_coding | 51,60 | 0 |
| ENSG00000172831 | CES2     | 16 | 66934444  | 66945096  | protein_coding | 51,54 | 0 |
| ENSG00000137727 | ARHGAP20 | 11 | 110577042 | 110713189 | protein_coding | 51,47 | 0 |
| ENSG00000135269 | TES      | 7  | 116210493 | 116258783 | protein_coding | 51,42 | 0 |
| ENSG00000147883 | CDKN2B   | 9  | 22002903  | 22009363  | protein_coding | 51,36 | 0 |
| ENSG00000178904 | DPY19L3  | 19 | 32405543  | 32485895  | protein_coding | 51,30 | 0 |
| ENSG00000084207 | GSTP1    | 11 | 67583595  | 67586660  | protein_coding | 51,28 | 0 |
| ENSG00000133116 | KL       | 13 | 33016433  | 33066145  | protein_coding | 51,26 | 0 |
| ENSG00000179698 | WDR97    | 8  | 144107726 | 144118315 | protein_coding | 51,21 | 0 |
| ENSG00000061455 | PRDM6    | 5  | 123089121 | 123194266 | protein_coding | 51,20 | 0 |
| ENSG00000187944 | C2orf66  | 2  | 196805002 | 196810276 | protein_coding | 51,20 | 0 |
| ENSG00000204822 | MRPL53   | 2  | 74471958  | 74473322  | protein_coding | 51,20 | 0 |
| ENSG00000138448 | ITGAV    | 2  | 186590065 | 186680901 | protein_coding | 51,13 | 0 |
| ENSG00000118513 | MYB      | 6  | 135181315 | 135219173 | protein_coding | 51,10 | 0 |
| ENSG00000037897 | METTL1   | 12 | 57768471  | 57772793  | protein_coding | 51,09 | 0 |
| ENSG00000139651 | ZNF740   | 12 | 53180700  | 53195141  | protein_coding | 51,09 | 0 |
| ENSG00000143437 | ARNT     | 1  | 150809705 | 150876768 | protein_coding | 51,07 | 0 |
| ENSG00000174744 | BRMS1    | 11 | 66337333  | 66345125  | protein_coding | 51,05 | 0 |
| ENSG00000059769 | DNAJC25  | 9  | 111631352 | 111654351 | protein_coding | 50,98 | 0 |
| ENSG00000244486 | SCARF2   | 22 | 20424585  | 20437859  | protein_coding | 50,90 | 0 |
| ENSG00000111325 | OGFOD2   | 12 | 122974580 | 122980043 | protein_coding | 50,90 | 0 |
| ENSG00000181019 | NQO1     | 16 | 69706996  | 69726951  | protein_coding | 50,80 | 0 |
| ENSG00000114013 | CD86     | 3  | 122055366 | 122121139 | protein_coding | 50,80 | 0 |
| ENSG00000160613 | PCSK7    | 11 | 117204337 | 117232525 | protein_coding | 50,69 | 0 |
| ENSG00000089351 | GRAMD1A  | 19 | 34994784  | 35026471  | protein_coding | 50,57 | 0 |
| ENSG00000079999 | KEAP1    | 19 | 10486120  | 10503741  | protein_coding | 50,52 | 0 |
| ENSG00000164096 | C4orf3   | 4  | 119296419 | 119304445 | protein_coding | 50,51 | 0 |
| ENSG00000120705 | ETF1     | 5  | 138506095 | 138543300 | protein_coding | 50,50 | 0 |
| ENSG00000075461 | CACNG4   | 17 | 66964910  | 67033398  | protein_coding | 50,40 | 0 |
| ENSG00000152484 | USP12    | 13 | 27066142  | 27171896  | protein_coding | 50,40 | 0 |
| ENSG00000166887 | VPS39    | 15 | 42158701  | 42208316  | protein_coding | 50,33 | 0 |
| ENSG00000133104 | SPG20    | 13 | 36301638  | 36370180  | protein_coding | 50,31 | 0 |
| ENSG00000228594 | C1orf233 | 1  | 1598012   | 1600096   | protein_coding | 50,30 | 0 |
| ENSG00000037965 | HOXC8    | 12 | 54009106  | 54012362  | protein_coding | 50,30 | 0 |
| ENSG00000077420 | APBB1IP  | 10 | 26438203  | 26567803  | protein_coding | 50,30 | 0 |
| ENSG00000186510 | CLCNKA   | 1  | 16018875  | 16034050  | protein_coding | 50,30 | 0 |
| ENSG00000149091 | DGKZ     | 11 | 46332905  | 46380554  | protein_coding | 50,27 | 0 |
| ENSG00000142634 | EFHD2    | 1  | 15409895  | 15430343  | protein_coding | 50,21 | 0 |
| ENSG00000148444 | COMMD3   | 10 | 22315974  | 22320308  | protein_coding | 50,20 | 0 |
| ENSG00000052749 | RRP12    | 10 | 97356358  | 97426076  | protein_coding | 50,16 | 0 |
| ENSG00000077238 | IL4R     | 16 | 27313668  | 27364778  | protein_coding | 50,14 | 0 |
| ENSG00000204257 | HLA-DMA  | 6  | 32948613  | 32969094  | protein_coding | 50,14 | 0 |
| ENSG00000175376 | EIF1AD   | 11 | 65996545  | 66002176  | protein_coding | 50,08 | 0 |
| ENSG00000145147 | SLIT2    | 4  | 20253260  | 20620561  | protein_coding | 50,06 | 0 |
| ENSG00000185513 | L3MBTL1  | 20 | 43507680  | 43550950  | protein_coding | 50,05 | 0 |
| ENSG00000089327 | FXYD5    | 19 | 35154730  | 35169883  | protein_coding | 50,00 | 0 |
| ENSG00000114631 | PODXL2   | 3  | 127629181 | 127672809 | protein_coding | 50,00 | 0 |
| ENSG00000161533 | ACOX1    | 17 | 75941507  | 75979363  | protein_coding | 49,95 | 0 |
| ENSG00000049239 | H6PD     | 1  | 9234775   | 9271337   | protein_coding | 49,92 | 0 |
| ENSG00000240583 | AQP1     | 7  | 30911855  | 30925516  | protein_coding | 49,90 | 0 |

|                 |            |    |           |           |                |       |   |
|-----------------|------------|----|-----------|-----------|----------------|-------|---|
| ENSG00000160014 | CALM3      | 19 | 46601074  | 46610793  | protein_coding | 49,84 | 0 |
| ENSG00000188707 | ZBED6CL    | 7  | 150329789 | 150332721 | protein_coding | 49,82 | 0 |
| ENSG00000042832 | TG         | 8  | 132866958 | 133134903 | protein_coding | 49,82 | 0 |
| ENSG00000101049 | SGK2       | 20 | 43558968  | 43588237  | protein_coding | 49,80 | 0 |
| ENSG00000185482 | STAC3      | 12 | 57243453  | 57251193  | protein_coding | 49,80 | 0 |
| ENSG00000150681 | RGS18      | 1  | 192158457 | 192185815 | protein_coding | 49,80 | 0 |
| ENSG00000197782 | ZNF780A    | 19 | 40069152  | 40090938  | protein_coding | 49,79 | 0 |
| ENSG00000145191 | EIF2B5     | 3  | 184135038 | 184684758 | protein_coding | 49,75 | 0 |
| ENSG00000259207 | ITGB3      | 17 | 47253846  | 47311816  | protein_coding | 49,70 | 0 |
| ENSG00000167566 | NCKAP5L    | 12 | 49791146  | 49828750  | protein_coding | 49,65 | 0 |
| ENSG00000130052 | STARD8     | X  | 68647666  | 68725842  | protein_coding | 49,50 | 0 |
| ENSG00000101638 | ST8SIA5    | 18 | 46667821  | 46759257  | protein_coding | 49,48 | 0 |
| ENSG00000112640 | PPP2R5D    | 6  | 42984499  | 43012342  | protein_coding | 49,46 | 0 |
| ENSG00000197442 | MAP3K5     | 6  | 136557047 | 136792518 | protein_coding | 49,44 | 0 |
| ENSG00000139193 | CD27       | 12 | 6444867   | 6451718   | protein_coding | 49,40 | 0 |
| ENSG00000266173 | STRADA     | 17 | 63702832  | 63741970  | protein_coding | 49,37 | 0 |
| ENSG00000176788 | BASP1      | 5  | 17065598  | 17276843  | protein_coding | 49,33 | 0 |
| ENSG00000204237 | OXLD1      | 17 | 81665036  | 81666635  | protein_coding | 49,33 | 0 |
| ENSG00000109111 | SUPT6H     | 17 | 28662091  | 28702684  | protein_coding | 49,31 | 0 |
| ENSG00000186908 | ZDHHC17    | 12 | 76763588  | 76853696  | protein_coding | 49,26 | 0 |
| ENSG00000129187 | DCTD       | 4  | 182890060 | 182917936 | protein_coding | 49,25 | 0 |
| ENSG00000143320 | CRABP2     | 1  | 156699606 | 156705816 | protein_coding | 49,21 | 0 |
| ENSG00000100201 | DDX17      | 22 | 38483440  | 38507660  | protein_coding | 49,17 | 0 |
| ENSG00000116285 | ERRFI1     | 1  | 8004404   | 8026308   | protein_coding | 49,05 | 0 |
| ENSG00000170144 | HNRNPA3    | 2  | 177212563 | 177223958 | protein_coding | 48,96 | 0 |
| ENSG00000178078 | STAP2      | 19 | 4324043   | 4342786   | protein_coding | 48,91 | 0 |
| ENSG00000185347 | C14orf80   | 14 | 105489855 | 105499575 | protein_coding | 48,91 | 0 |
| ENSG00000128016 | ZFP36      | 19 | 39406813  | 39409412  | protein_coding | 48,90 | 0 |
| ENSG00000172197 | MBOAT1     | 6  | 20102145  | 20212399  | protein_coding | 48,90 | 0 |
| ENSG00000254535 | PABPC4L    | 4  | 134196333 | 134201748 | protein_coding | 48,90 | 0 |
| ENSG00000103356 | EARS2      | 16 | 23522014  | 23557731  | protein_coding | 48,87 | 0 |
| ENSG00000169228 | RAB24      | 5  | 177301198 | 177303744 | protein_coding | 48,83 | 0 |
| ENSG00000115590 | IL1R2      | 2  | 101991844 | 102028544 | protein_coding | 48,80 | 0 |
| ENSG00000186376 | ZNF75D     | X  | 135248920 | 135344087 | protein_coding | 48,80 | 0 |
| ENSG00000123096 | SSPN       | 12 | 26121991  | 26299290  | protein_coding | 48,78 | 0 |
| ENSG00000259431 | THTPA      | 14 | 23555988  | 23560271  | protein_coding | 48,77 | 0 |
| ENSG00000169246 | NPIP3      | 16 | 21402237  | 21448567  | protein_coding | 48,75 | 0 |
| ENSG00000159921 | GNE        | 9  | 36214441  | 36277056  | protein_coding | 48,74 | 0 |
| ENSG00000198832 | ENSG000001 | 22 | 31104772  | 31120069  | protein_coding | 48,71 | 0 |
| ENSG00000197632 | SERPINB2   | 18 | 63871692  | 63903890  | protein_coding | 48,70 | 0 |
| ENSG00000120896 | SORBS3     | 8  | 22544986  | 22575788  | protein_coding | 48,66 | 0 |
| ENSG00000143178 | TBX19      | 1  | 168281040 | 168314426 | protein_coding | 48,64 | 0 |
| ENSG00000104972 | LILRB1     | 19 | 54617158  | 54637528  | protein_coding | 48,60 | 0 |
| ENSG00000135605 | TEC        | 4  | 48135783  | 48269864  | protein_coding | 48,60 | 0 |
| ENSG00000174516 | PELI3      | 11 | 66466327  | 66477337  | protein_coding | 48,57 | 0 |
| ENSG00000136826 | KLF4       | 9  | 107484852 | 107490482 | protein_coding | 48,57 | 0 |
| ENSG00000109065 | NAT9       | 17 | 74770547  | 74776367  | protein_coding | 48,56 | 0 |
| ENSG00000170677 | SOCS6      | 18 | 70288901  | 70330200  | protein_coding | 48,54 | 0 |
| ENSG00000183496 | MEX3B      | 15 | 82041778  | 82046141  | protein_coding | 48,50 | 0 |
| ENSG00000156097 | GPR61      | 1  | 109539872 | 109548406 | protein_coding | 48,50 | 0 |
| ENSG00000162704 | ARPC5      | 1  | 183620846 | 183635757 | protein_coding | 48,49 | 0 |
| ENSG00000164309 | CMYA5      | 5  | 79689877  | 79800240  | protein_coding | 48,32 | 0 |
| ENSG00000174599 | TRAM1L1    | 4  | 117083554 | 117085576 | protein_coding | 48,20 | 0 |
| ENSG00000167766 | ZNF83      | 19 | 52594060  | 52690496  | protein_coding | 48,20 | 0 |
| ENSG00000136870 | ZNF189     | 9  | 101398873 | 101410660 | protein_coding | 48,16 | 0 |
| ENSG00000165389 | SPTSSA     | 14 | 34432789  | 34462356  | protein_coding | 48,11 | 0 |
| ENSG00000111886 | GABRR2     | 6  | 89257208  | 89315299  | protein_coding | 48,10 | 0 |
| ENSG00000205730 | ITPRIPL2   | 16 | 19113932  | 19121629  | protein_coding | 48,00 | 0 |

|                 |          |    |           |           |                |       |   |
|-----------------|----------|----|-----------|-----------|----------------|-------|---|
| ENSG00000134321 | RSAD2    | 2  | 6865806   | 6898239   | protein_coding | 48,00 | 0 |
| ENSG00000178927 | C17orf62 | 17 | 82442589  | 82450829  | protein_coding | 47,98 | 0 |
| ENSG00000100243 | CYB5R3   | 22 | 42617840  | 42649568  | protein_coding | 47,97 | 0 |
| ENSG00000137270 | GCM1     | 6  | 53126964  | 53148829  | protein_coding | 47,90 | 0 |
| ENSG00000179364 | PACS2    | 14 | 105300563 | 105398147 | protein_coding | 47,83 | 0 |
| ENSG00000146858 | ZC3HAV1L | 7  | 139025706 | 139036029 | protein_coding | 47,81 | 0 |
| ENSG00000062582 | MRPS24   | 7  | 43866558  | 43869893  | protein_coding | 47,80 | 0 |
| ENSG00000095319 | NUP188   | 9  | 128947699 | 129007096 | protein_coding | 47,73 | 0 |
| ENSG00000061918 | GUCY1B3  | 4  | 155758992 | 155807591 | protein_coding | 47,70 | 0 |
| ENSG00000160695 | VPS11    | 11 | 119067692 | 119081978 | protein_coding | 47,66 | 0 |
| ENSG00000258227 | CLEC5A   | 7  | 141927357 | 141947007 | protein_coding | 47,60 | 0 |
| ENSG00000106089 | STX1A    | 7  | 73699206  | 73719672  | protein_coding | 47,50 | 0 |
| ENSG00000242574 | HLA-DMB  | 6  | 32934629  | 32941070  | protein_coding | 47,50 | 0 |
| ENSG00000173372 | C1QA     | 1  | 22636506  | 22639608  | protein_coding | 47,50 | 0 |
| ENSG00000103266 | STUB1    | 16 | 680224    | 682870    | protein_coding | 47,49 | 0 |
| ENSG00000265808 | SEC22B   | 1  | 120150898 | 120176515 | protein_coding | 47,44 | 0 |
| ENSG00000187840 | EIF4EBP1 | 8  | 38030341  | 38060365  | protein_coding | 47,43 | 0 |
| ENSG00000162231 | NXF1     | 11 | 62792123  | 62806302  | protein_coding | 47,42 | 0 |
| ENSG00000118407 | FILIP1   | 6  | 75291859  | 75493738  | protein_coding | 47,42 | 0 |
| ENSG00000266967 | AARSD1   | 17 | 42950526  | 42964498  | protein_coding | 47,40 | 0 |
| ENSG00000151632 | AKR1C2   | 10 | 4922564   | 5135226   | protein_coding | 47,40 | 0 |
| ENSG00000197070 | ARRDC1   | 9  | 137605654 | 137615360 | protein_coding | 47,36 | 0 |
| ENSG00000102524 | TNFSF13B | 13 | 108251240 | 108308484 | protein_coding | 47,30 | 0 |
| ENSG00000241043 | GVQW1    | 9  | 32566789  | 32568621  | protein_coding | 47,30 | 0 |
| ENSG00000142784 | WDTC1    | 1  | 27234516  | 27308633  | protein_coding | 47,30 | 0 |
| ENSG00000197321 | SVIL     | 10 | 29457338  | 29736781  | protein_coding | 47,30 | 0 |
| ENSG00000173064 | HECTD4   | 12 | 112160188 | 112382439 | protein_coding | 47,29 | 0 |
| ENSG00000106628 | POLD2    | 7  | 44114681  | 44124358  | protein_coding | 47,26 | 0 |
| ENSG00000084674 | APOB     | 2  | 21001429  | 21044073  | protein_coding | 47,25 | 0 |
| ENSG00000141622 | RNF165   | 18 | 46326809  | 46463140  | protein_coding | 47,24 | 0 |
| ENSG00000187634 | SAMD11   | 1  | 924880    | 944581    | protein_coding | 47,14 | 0 |
| ENSG00000170558 | CDH2     | 18 | 27950966  | 28177446  | protein_coding | 47,06 | 0 |
| ENSG00000020129 | NCDN     | 1  | 35557473  | 35567274  | protein_coding | 47,05 | 0 |
| ENSG00000105220 | GPI      | 19 | 34359480  | 34402156  | protein_coding | 47,05 | 0 |
| ENSG00000164323 | CFAP97   | 4  | 185159665 | 185209504 | protein_coding | 47,00 | 0 |
| ENSG00000214753 | HNRNPUL2 | 11 | 62712630  | 62727349  | protein_coding | 46,98 | 0 |
| ENSG00000139625 | MAP3K12  | 12 | 53479669  | 53500063  | protein_coding | 46,93 | 0 |
| ENSG00000167470 | MIDN     | 19 | 1248553   | 1259140   | protein_coding | 46,86 | 0 |
| ENSG00000114030 | KPNA1    | 3  | 122421949 | 122514945 | protein_coding | 46,86 | 0 |
| ENSG00000124193 | SRSF6    | 20 | 43457928  | 43464247  | protein_coding | 46,84 | 0 |
| ENSG00000149599 | DUSP15   | 20 | 31847637  | 31870747  | protein_coding | 46,80 | 0 |
| ENSG00000243232 | PCDHAC2  | 5  | 140966235 | 141012344 | protein_coding | 46,80 | 0 |
| ENSG00000176720 | BOK      | 2  | 241558721 | 241574138 | protein_coding | 46,77 | 0 |
| ENSG00000111912 | NCOA7    | 6  | 125781161 | 125932030 | protein_coding | 46,76 | 0 |
| ENSG00000168209 | DDIT4    | 10 | 72273920  | 72276036  | protein_coding | 46,72 | 0 |
| ENSG00000146555 | SDK1     | 7  | 3301448   | 4269000   | protein_coding | 46,67 | 0 |
| ENSG00000108179 | PPIF     | 10 | 79347469  | 79355337  | protein_coding | 46,63 | 0 |
| ENSG00000105695 | MAG      | 19 | 35292125  | 35313804  | protein_coding | 46,60 | 0 |
| ENSG00000136286 | MYO1G    | 7  | 44962662  | 44979098  | protein_coding | 46,50 | 0 |
| ENSG00000155115 | GTF3C6   | 6  | 110958560 | 110967890 | protein_coding | 46,42 | 0 |
| ENSG00000177383 | MAGEF1   | 3  | 184710367 | 184712002 | protein_coding | 46,41 | 0 |
| ENSG00000101940 | WDR13    | X  | 48590042  | 48608867  | protein_coding | 46,40 | 0 |
| ENSG00000100197 | CYP2D6   | 22 | 42126499  | 42130906  | protein_coding | 46,40 | 0 |
| ENSG00000101152 | DNAJC5   | 20 | 63895182  | 63936031  | protein_coding | 46,31 | 0 |
| ENSG00000053501 | USE1     | 19 | 17215346  | 17219829  | protein_coding | 46,27 | 0 |
| ENSG00000187824 | TMEM220  | 17 | 10699015  | 10730316  | protein_coding | 46,23 | 0 |
| ENSG00000204149 | AGAP6    | 10 | 49982190  | 50010499  | protein_coding | 46,19 | 0 |
| ENSG00000060491 | OGFR     | 20 | 62804835  | 62814000  | protein_coding | 46,18 | 0 |



|                 |            |    |           |           |                |       |   |
|-----------------|------------|----|-----------|-----------|----------------|-------|---|
| ENSG00000180871 | CXCR2      | 2  | 218125289 | 218137253 | protein_coding | 46,09 | 0 |
| ENSG00000166272 | WBP1L      | 10 | 102743970 | 102816267 | protein_coding | 46,05 | 0 |
| ENSG00000077157 | PPP1R12B   | 1  | 202348699 | 202592706 | protein_coding | 46,02 | 0 |
| ENSG00000050628 | PTGER3     | 1  | 70852353  | 71047808  | protein_coding | 46,00 | 0 |
| ENSG00000136699 | SMPD4      | 2  | 130151392 | 130182750 | protein_coding | 45,99 | 0 |
| ENSG00000173482 | PTPRM      | 18 | 7566782   | 8406861   | protein_coding | 45,98 | 0 |
| ENSG00000105321 | CCDC9      | 19 | 47255980  | 47271953  | protein_coding | 45,94 | 0 |
| ENSG00000154217 | PITPNC1    | 17 | 67377281  | 67697261  | protein_coding | 45,93 | 0 |
| ENSG00000182885 | ADGRG3     | 16 | 57668187  | 57689378  | protein_coding | 45,80 | 0 |
| ENSG00000140030 | GPR65      | 14 | 88005124  | 88014811  | protein_coding | 45,80 | 0 |
| ENSG00000127418 | FGFRL1     | 4  | 1009936   | 1026897   | protein_coding | 45,76 | 0 |
| ENSG00000111530 | CAND1      | 12 | 67269281  | 67319951  | protein_coding | 45,66 | 0 |
| ENSG00000063244 | U2AF2      | 19 | 55654146  | 55674715  | protein_coding | 45,64 | 0 |
| ENSG00000185129 | PURA       | 5  | 140107777 | 140125619 | protein_coding | 45,63 | 0 |
| ENSG00000138107 | ACTR1A     | 10 | 102479229 | 102502711 | protein_coding | 45,62 | 0 |
| ENSG00000105483 | CARD8      | 19 | 48180770  | 48255946  | protein_coding | 45,61 | 0 |
| ENSG00000135929 | CYP27A1    | 2  | 218781749 | 218815293 | protein_coding | 45,60 | 0 |
| ENSG00000142661 | MYOM3      | 1  | 24056035  | 24112175  | protein_coding | 45,60 | 0 |
| ENSG00000104853 | CLPTM1     | 19 | 44954585  | 44993341  | protein_coding | 45,58 | 0 |
| ENSG00000172296 | SPTLC3     | 20 | 13008979  | 13169103  | protein_coding | 45,56 | 0 |
| ENSG00000108846 | ABCC3      | 17 | 50634777  | 50692252  | protein_coding | 45,54 | 0 |
| ENSG00000101997 | CCDC22     | X  | 49235467  | 49250526  | protein_coding | 45,54 | 0 |
| ENSG00000144230 | GPR17      | 2  | 127645864 | 127652639 | protein_coding | 45,50 | 0 |
| ENSG00000015532 | XYLT2      | 17 | 50346092  | 50363138  | protein_coding | 45,43 | 0 |
| ENSG00000149577 | SIDT2      | 11 | 117178733 | 117197445 | protein_coding | 45,36 | 0 |
| ENSG00000087460 | GNAS       | 20 | 58839718  | 58911192  | protein_coding | 45,36 | 0 |
| ENSG00000116871 | MAP7D1     | 1  | 36155579  | 36180849  | protein_coding | 45,35 | 0 |
| ENSG00000141968 | VAV1       | 19 | 6772714   | 6857366   | protein_coding | 45,30 | 0 |
| ENSG00000258315 | C17orf49   | 17 | 7014495   | 7017525   | protein_coding | 45,30 | 0 |
| ENSG00000143110 | C1orf162   | 1  | 111473792 | 111478512 | protein_coding | 45,30 | 0 |
| ENSG00000089472 | HEPH       | X  | 66162549  | 66268867  | protein_coding | 45,30 | 0 |
| ENSG00000103742 | IGDCC4     | 15 | 65381464  | 65423072  | protein_coding | 45,26 | 0 |
| ENSG00000141971 | MVB12A     | 19 | 17405722  | 17433724  | protein_coding | 45,25 | 0 |
| ENSG00000167535 | CACNB3     | 12 | 48813794  | 48828941  | protein_coding | 45,21 | 0 |
| ENSG00000005243 | COPZ2      | 17 | 48026167  | 48038030  | protein_coding | 45,20 | 0 |
| ENSG00000106123 | EPHB6      | 7  | 142855061 | 142871094 | protein_coding | 45,20 | 0 |
| ENSG00000242802 | AP5Z1      | 7  | 4775622   | 4794312   | protein_coding | 45,15 | 0 |
| ENSG00000168610 | STAT3      | 17 | 42313324  | 42388568  | protein_coding | 45,12 | 0 |
| ENSG00000254996 | ANKHD1-EIF | 5  | 140401908 | 140549569 | protein_coding | 45,10 | 0 |
| ENSG00000168906 | MAT2A      | 2  | 85539165  | 85545280  | protein_coding | 45,04 | 0 |
| ENSG00000118162 | KPTN       | 19 | 47475144  | 47484268  | protein_coding | 45,04 | 0 |
| ENSG00000089041 | P2RX7      | 12 | 121132819 | 121188032 | protein_coding | 45,04 | 0 |
| ENSG00000130810 | PPAN       | 19 | 10106289  | 10111634  | protein_coding | 45,00 | 0 |
| ENSG00000135643 | KCNMB4     | 12 | 70366276  | 70434292  | protein_coding | 45,00 | 0 |
| ENSG00000073067 | CYP2W1     | 7  | 983199    | 989640    | protein_coding | 45,00 | 0 |
| ENSG00000184117 | NIPSNAP1   | 22 | 29554808  | 29581337  | protein_coding | 44,98 | 0 |
| ENSG00000204859 | ZBTB48     | 1  | 6580001   | 6589280   | protein_coding | 44,98 | 0 |
| ENSG00000240682 | ISY1       | 3  | 129127415 | 129161293 | protein_coding | 44,94 | 0 |
| ENSG00000176401 | EID2B      | 19 | 39530990  | 39532854  | protein_coding | 44,90 | 0 |
| ENSG00000150281 | CTF1       | 16 | 30896607  | 30903560  | protein_coding | 44,90 | 0 |
| ENSG00000126767 | ELK1       | X  | 47635521  | 47650604  | protein_coding | 44,90 | 0 |
| ENSG00000157353 | FUK        | 16 | 70454421  | 70480274  | protein_coding | 44,89 | 0 |
| ENSG00000183098 | GPC6       | 13 | 93226842  | 94407401  | protein_coding | 44,81 | 0 |
| ENSG00000012822 | CALCOCO1   | 12 | 53708517  | 53727745  | protein_coding | 44,80 | 0 |
| ENSG00000102760 | RGCC       | 13 | 41457559  | 41470882  | protein_coding | 44,79 | 0 |
| ENSG00000081320 | STK17B     | 2  | 196133566 | 196176503 | protein_coding | 44,77 | 0 |
| ENSG00000159733 | ZFYVE28    | 4  | 2269582   | 2418663   | protein_coding | 44,76 | 0 |
| ENSG00000008516 | MMP25      | 16 | 3046681   | 3060726   | protein_coding | 44,71 | 0 |

|                 |          |    |           |           |                |       |   |
|-----------------|----------|----|-----------|-----------|----------------|-------|---|
| ENSG00000160791 | CCR5     | 3  | 46370854  | 46376206  | protein_coding | 44,70 | 0 |
| ENSG00000126878 | AIF1L    | 9  | 131096476 | 131123152 | protein_coding | 44,64 | 0 |
| ENSG00000087269 | NOP14    | 4  | 2937933   | 2963385   | protein_coding | 44,55 | 0 |
| ENSG00000117640 | MTFR1L   | 1  | 25818640  | 25832942  | protein_coding | 44,55 | 0 |
| ENSG00000204291 | COL15A1  | 9  | 98943179  | 99070792  | protein_coding | 44,42 | 0 |
| ENSG00000100258 | LMF2     | 22 | 50502949  | 50507691  | protein_coding | 44,37 | 0 |
| ENSG00000173641 | HSPB7    | 1  | 16014028  | 16019594  | protein_coding | 44,30 | 0 |
| ENSG00000161091 | MFSD12   | 19 | 3538261   | 3574290   | protein_coding | 44,22 | 0 |
| ENSG00000100296 | THOC5    | 22 | 29505879  | 29555216  | protein_coding | 44,20 | 0 |
| ENSG00000174871 | CNIH2    | 11 | 66278190  | 66285301  | protein_coding | 44,20 | 0 |
| ENSG00000113048 | MRPS27   | 5  | 72219409  | 72320646  | protein_coding | 44,17 | 0 |
| ENSG00000086015 | MAST2    | 1  | 45786987  | 46036124  | protein_coding | 44,16 | 0 |
| ENSG00000105397 | TYK2     | 19 | 10350529  | 10380676  | protein_coding | 44,14 | 0 |
| ENSG00000206172 | HBA1     | 16 | 176680    | 177522    | protein_coding | 44,10 | 0 |
| ENSG00000146830 | GIGYF1   | 7  | 100679507 | 100689448 | protein_coding | 44,09 | 0 |
| ENSG00000115977 | AAK1     | 2  | 69457997  | 69674349  | protein_coding | 44,01 | 0 |
| ENSG00000103522 | IL21R    | 16 | 27402162  | 27452042  | protein_coding | 44,00 | 0 |
| ENSG00000134256 | CD101    | 1  | 117001750 | 117036476 | protein_coding | 44,00 | 0 |
| ENSG00000125734 | GPR108   | 19 | 6729914   | 6737603   | protein_coding | 43,99 | 0 |
| ENSG00000135069 | PSAT1    | 9  | 78297143  | 78330093  | protein_coding | 43,97 | 0 |
| ENSG00000129646 | QRICH2   | 17 | 76274049  | 76307680  | protein_coding | 43,96 | 0 |
| ENSG00000222046 | DCDC2B   | 1  | 32209094  | 32216196  | protein_coding | 43,94 | 0 |
| ENSG00000011422 | PLAUR    | 19 | 43646095  | 43670547  | protein_coding | 43,92 | 0 |
| ENSG00000215717 | TMEM167B | 1  | 109089803 | 109096934 | protein_coding | 43,90 | 0 |
| ENSG00000135842 | FAM129A  | 1  | 184790724 | 184974550 | protein_coding | 43,88 | 0 |
| ENSG00000112081 | SRSF3    | 6  | 36594353  | 36605600  | protein_coding | 43,86 | 0 |
| ENSG00000110660 | SLC35F2  | 11 | 107790991 | 107928293 | protein_coding | 43,83 | 0 |
| ENSG00000162738 | VANGL2   | 1  | 160400586 | 160428678 | protein_coding | 43,76 | 0 |
| ENSG00000142453 | CARM1    | 19 | 10871513  | 10923070  | protein_coding | 43,75 | 0 |
| ENSG00000163960 | UBXN7    | 3  | 196347662 | 196432474 | protein_coding | 43,75 | 0 |
| ENSG00000152076 | CCDC74B  | 2  | 130139287 | 130145134 | protein_coding | 43,70 | 0 |
| ENSG00000142875 | PRKACB   | 1  | 84078062  | 84238498  | protein_coding | 43,66 | 0 |
| ENSG00000180354 | MTURN    | 7  | 30134810  | 30162762  | protein_coding | 43,65 | 0 |
| ENSG00000107175 | CREB3    | 9  | 35732320  | 35737007  | protein_coding | 43,63 | 0 |
| ENSG00000158805 | ZNF276   | 16 | 89720400  | 89740903  | protein_coding | 43,54 | 0 |
| ENSG00000144357 | UBR3     | 2  | 169827458 | 170084131 | protein_coding | 43,53 | 0 |
| ENSG00000133985 | TTC9     | 14 | 70641787  | 70675360  | protein_coding | 43,51 | 0 |
| ENSG00000140044 | JDP2     | 14 | 75427716  | 75474111  | protein_coding | 43,48 | 0 |
| ENSG00000163626 | COX18    | 4  | 73052362  | 73069755  | protein_coding | 43,38 | 0 |
| ENSG00000033011 | ALG1     | 16 | 5033960   | 5087379   | protein_coding | 43,35 | 0 |
| ENSG00000009724 | MASP2    | 1  | 11026523  | 11047233  | protein_coding | 43,30 | 0 |
| ENSG00000110079 | MS4A4A   | 11 | 60280541  | 60308972  | protein_coding | 43,20 | 0 |
| ENSG00000154096 | THY1     | 11 | 119417378 | 119424985 | protein_coding | 43,20 | 0 |
| ENSG00000181789 | COPG1    | 3  | 129249606 | 129277773 | protein_coding | 43,17 | 0 |
| ENSG00000030419 | IKZF2    | 2  | 212999691 | 213152427 | protein_coding | 43,16 | 0 |
| ENSG00000126603 | GLIS2    | 16 | 4314761   | 4339597   | protein_coding | 43,12 | 0 |
| ENSG00000137343 | ATAT1    | 6  | 30626842  | 30646823  | protein_coding | 43,11 | 0 |
| ENSG00000139637 | C12orf10 | 12 | 53299686  | 53307177  | protein_coding | 43,11 | 0 |
| ENSG00000186010 | NDUFA13  | 19 | 19515736  | 19529054  | protein_coding | 43,10 | 0 |
| ENSG00000152582 | SPEF2    | 5  | 35617844  | 35814611  | protein_coding | 43,10 | 0 |
| ENSG00000196172 | ZNF681   | 19 | 23739195  | 23758891  | protein_coding | 43,05 | 0 |
| ENSG00000179855 | GIPC3    | 19 | 3585553   | 3593541   | protein_coding | 43,00 | 0 |
| ENSG00000072210 | ALDH3A2  | 17 | 19648136  | 19677598  | protein_coding | 43,00 | 0 |
| ENSG00000174938 | SEZ6L2   | 16 | 29871159  | 29899547  | protein_coding | 42,99 | 0 |
| ENSG00000158716 | DUSP23   | 1  | 159780932 | 159782543 | protein_coding | 42,96 | 0 |
| ENSG00000124574 | ABCC10   | 6  | 43427366  | 43450430  | protein_coding | 42,94 | 0 |
| ENSG00000244187 | TMEM141  | 9  | 136791355 | 136793257 | protein_coding | 42,94 | 0 |
| ENSG00000099937 | SERPIND1 | 22 | 20773879  | 20787720  | protein_coding | 42,90 | 0 |

|                 |           |    |           |           |                |       |   |
|-----------------|-----------|----|-----------|-----------|----------------|-------|---|
| ENSG00000139209 | SLC38A4   | 12 | 46764761  | 46832408  | protein_coding | 42,90 | 0 |
| ENSG00000147036 | LANCL3    | X  | 37571569  | 37684463  | protein_coding | 42,82 | 0 |
| ENSG00000118046 | STK11     | 19 | 1177558   | 1228435   | protein_coding | 42,81 | 0 |
| ENSG00000116761 | CTH       | 1  | 70411218  | 70439851  | protein_coding | 42,80 | 0 |
| ENSG00000103269 | RHBDL1    | 16 | 675666    | 678268    | protein_coding | 42,80 | 0 |
| ENSG00000110931 | CAMKK2    | 12 | 121237691 | 121298308 | protein_coding | 42,80 | 0 |
| ENSG00000140391 | TSPAN3    | 15 | 77041404  | 77083984  | protein_coding | 42,79 | 0 |
| ENSG00000067167 | TRAM1     | 8  | 70573442  | 70608387  | protein_coding | 42,77 | 0 |
| ENSG00000110900 | TSPAN11   | 12 | 30926428  | 30996599  | protein_coding | 42,77 | 0 |
| ENSG00000126070 | AGO3      | 1  | 35930718  | 36072500  | protein_coding | 42,71 | 0 |
| ENSG00000188559 | RALGAPA2  | 20 | 20389552  | 20712488  | protein_coding | 42,70 | 0 |
| ENSG00000103671 | TRIP4     | 15 | 64387748  | 64455303  | protein_coding | 42,70 | 0 |
| ENSG00000188848 | BEND4     | 4  | 42110938  | 42152878  | protein_coding | 42,70 | 0 |
| ENSG00000164733 | CTSB      | 8  | 11842524  | 11869448  | protein_coding | 42,67 | 0 |
| ENSG00000122481 | RWDD3     | 1  | 95234155  | 95247225  | protein_coding | 42,62 | 0 |
| ENSG00000100280 | AP1B1     | 22 | 29327680  | 29423179  | protein_coding | 42,60 | 0 |
| ENSG00000100288 | CHKB      | 22 | 50578949  | 50601455  | protein_coding | 42,60 | 0 |
| ENSG00000171219 | CDC42BPG  | 11 | 64823387  | 64844569  | protein_coding | 42,60 | 0 |
| ENSG00000120697 | ALG5      | 13 | 36949775  | 37000261  | protein_coding | 42,59 | 0 |
| ENSG00000123739 | PLA2G12A  | 4  | 109709989 | 109730077 | protein_coding | 42,58 | 0 |
| ENSG00000169045 | HNRNPH1   | 5  | 179614178 | 179634784 | protein_coding | 42,57 | 0 |
| ENSG00000123992 | DNPEP     | 2  | 219373546 | 219400022 | protein_coding | 42,55 | 0 |
| ENSG00000120686 | UFM1      | 13 | 38349849  | 38363619  | protein_coding | 42,50 | 0 |
| ENSG00000073803 | MAP3K13   | 3  | 185282941 | 185489097 | protein_coding | 42,46 | 0 |
| ENSG00000108947 | EFNB3     | 17 | 7705202   | 7711378   | protein_coding | 42,43 | 0 |
| ENSG00000171049 | FPR2      | 19 | 51752026  | 51770526  | protein_coding | 42,40 | 0 |
| ENSG00000213139 | CRYGS     | 3  | 186538441 | 186546702 | protein_coding | 42,40 | 0 |
| ENSG00000102032 | RENBP     | X  | 153935263 | 153944691 | protein_coding | 42,40 | 0 |
| ENSG00000139517 | LNX2      | 13 | 27545911  | 27620404  | protein_coding | 42,40 | 0 |
| ENSG00000071894 | CPSF1     | 8  | 144393229 | 144409349 | protein_coding | 42,39 | 0 |
| ENSG00000122566 | HNRNPA2B1 | 7  | 26189927  | 26201529  | protein_coding | 42,31 | 0 |
| ENSG00000105771 | SMG9      | 19 | 43727992  | 43754990  | protein_coding | 42,27 | 0 |
| ENSG00000176658 | MYO1D     | 17 | 32492522  | 32877177  | protein_coding | 42,26 | 0 |
| ENSG00000175768 | TOMM5     | 9  | 37582646  | 37592642  | protein_coding | 42,25 | 0 |
| ENSG00000189184 | PCDH18    | 4  | 137518918 | 137532494 | protein_coding | 42,20 | 0 |
| ENSG00000174004 | NRROS     | 3  | 196639686 | 196662004 | protein_coding | 42,20 | 0 |
| ENSG00000067840 | PDZD4     | X  | 153802166 | 153830565 | protein_coding | 42,20 | 0 |
| ENSG00000107021 | TBC1D13   | 9  | 128787204 | 128810432 | protein_coding | 42,15 | 0 |
| ENSG00000146250 | PRSS35    | 6  | 83512538  | 83525704  | protein_coding | 42,14 | 0 |
| ENSG00000145945 | FAM50B    | 6  | 3849386   | 3851317   | protein_coding | 42,13 | 0 |
| ENSG00000166793 | YPEL4     | 11 | 57645087  | 57649944  | protein_coding | 42,10 | 0 |
| ENSG00000175463 | TBC1D10C  | 11 | 67403915  | 67410089  | protein_coding | 42,10 | 0 |
| ENSG00000172738 | TMEM217   | 6  | 37212180  | 37258155  | protein_coding | 42,00 | 0 |
| ENSG00000162144 | CYB561A3  | 11 | 61348745  | 61362299  | protein_coding | 41,99 | 0 |
| ENSG00000131503 | ANKHD1    | 5  | 140401814 | 140539856 | protein_coding | 41,92 | 0 |
| ENSG00000241839 | PLEKHO2   | 15 | 64841883  | 64868007  | protein_coding | 41,91 | 0 |
| ENSG00000137218 | FRS3      | 6  | 41770176  | 41786542  | protein_coding | 41,91 | 0 |
| ENSG00000091106 | NLRC4     | 2  | 32224453  | 32265854  | protein_coding | 41,90 | 0 |
| ENSG00000155761 | SPAG17    | 1  | 117953861 | 118185223 | protein_coding | 41,90 | 0 |
| ENSG00000181396 | OGFOD3    | 17 | 82389223  | 82418637  | protein_coding | 41,88 | 0 |
| ENSG00000170961 | HAS2      | 8  | 121612116 | 121641390 | protein_coding | 41,88 | 0 |
| ENSG00000005448 | WDR54     | 2  | 74421678  | 74425755  | protein_coding | 41,83 | 0 |
| ENSG00000196458 | ZNF605    | 12 | 132918308 | 132956306 | protein_coding | 41,79 | 0 |
| ENSG00000177076 | ACER2     | 9  | 19409059  | 19452020  | protein_coding | 41,76 | 0 |
| ENSG00000152952 | PLOD2     | 3  | 146069440 | 146163653 | protein_coding | 41,76 | 0 |
| ENSG00000099203 | TMED1     | 19 | 10832438  | 10836318  | protein_coding | 41,73 | 0 |
| ENSG00000105447 | GRWD1     | 19 | 48445773  | 48457022  | protein_coding | 41,65 | 0 |
| ENSG00000103326 | CAPN15    | 16 | 527717    | 554636    | protein_coding | 41,61 | 0 |

|                 |           |    |           |           |                |       |   |
|-----------------|-----------|----|-----------|-----------|----------------|-------|---|
| ENSG00000181016 | LSMEM1    | 7  | 112480853 | 112491062 | protein_coding | 41,60 | 0 |
| ENSG00000273802 | HIST1H2BG | 6  | 26215159  | 26216692  | protein_coding | 41,60 | 0 |
| ENSG00000168066 | SF1       | 11 | 64764606  | 64778786  | protein_coding | 41,59 | 0 |
| ENSG00000104859 | CLASRP    | 19 | 45039040  | 45070956  | protein_coding | 41,59 | 0 |
| ENSG00000108654 | DDX5      | 17 | 64499616  | 64508199  | protein_coding | 41,58 | 0 |
| ENSG00000153485 | TMEM251   | 14 | 93184951  | 93187089  | protein_coding | 41,58 | 0 |
| ENSG00000162545 | CAMK2N1   | 1  | 20482391  | 20486220  | protein_coding | 41,57 | 0 |
| ENSG00000149930 | TAOK2     | 16 | 29973641  | 29992261  | protein_coding | 41,53 | 0 |
| ENSG00000008394 | MGST1     | 12 | 16347142  | 16609259  | protein_coding | 41,52 | 0 |
| ENSG00000180089 | TMEM86B   | 19 | 55226639  | 55229264  | protein_coding | 41,50 | 0 |
| ENSG00000164932 | CTHRC1    | 8  | 103371515 | 103382997 | protein_coding | 41,50 | 0 |
| ENSG00000134201 | GSTM5     | 1  | 109712255 | 109775428 | protein_coding | 41,50 | 0 |
| ENSG00000007516 | BAIAP3    | 16 | 1333601   | 1349441   | protein_coding | 41,47 | 0 |
| ENSG00000167004 | PDIA3     | 15 | 43746392  | 43773279  | protein_coding | 41,42 | 0 |
| ENSG00000087995 | METTL2A   | 17 | 62423867  | 62450822  | protein_coding | 41,39 | 0 |
| ENSG00000100926 | TM9SF1    | 14 | 24189143  | 24195687  | protein_coding | 41,37 | 0 |
| ENSG00000106397 | PLOD3     | 7  | 101205977 | 101218420 | protein_coding | 41,36 | 0 |
| ENSG00000104856 | RELB      | 19 | 45001430  | 45038198  | protein_coding | 41,35 | 0 |
| ENSG00000164877 | MICALL2   | 7  | 1428465   | 1459502   | protein_coding | 41,30 | 0 |
| ENSG00000187372 | PCDHB13   | 5  | 141213919 | 141218979 | protein_coding | 41,21 | 0 |
| ENSG00000186326 | RGS9BP    | 19 | 32675407  | 32678300  | protein_coding | 41,21 | 0 |
| ENSG00000066382 | MPPED2    | 11 | 30384493  | 30586872  | protein_coding | 41,20 | 0 |
| ENSG00000198585 | NUDT16    | 3  | 131381671 | 131388830 | protein_coding | 41,17 | 0 |
| ENSG00000140262 | TCF12     | 15 | 56918623  | 57299281  | protein_coding | 41,11 | 0 |
| ENSG00000154258 | ABCA9     | 17 | 68974488  | 69061064  | protein_coding | 41,03 | 0 |
| ENSG00000160200 | CBS       | 21 | 43053191  | 43076943  | protein_coding | 41,00 | 0 |
| ENSG00000182240 | BACE2     | 21 | 41167801  | 41282518  | protein_coding | 40,99 | 0 |
| ENSG00000134569 | LRP4      | 11 | 46856868  | 46918642  | protein_coding | 40,94 | 0 |
| ENSG00000071626 | DAZAP1    | 19 | 1407569   | 1435687   | protein_coding | 40,93 | 0 |
| ENSG00000183186 | C2CD4C    | 19 | 405438    | 409170    | protein_coding | 40,90 | 0 |
| ENSG00000127870 | RNF6      | 13 | 26132115  | 26222493  | protein_coding | 40,90 | 0 |
| ENSG00000027697 | IFNGR1    | 6  | 137197484 | 137219449 | protein_coding | 40,86 | 0 |
| ENSG00000144036 | EXOC6B    | 2  | 72175984  | 72826041  | protein_coding | 40,86 | 0 |
| ENSG00000205133 | TRIQQ     | 8  | 92883530  | 93017673  | protein_coding | 40,76 | 0 |
| ENSG00000187624 | C17orf97  | 17 | 410327    | 431062    | protein_coding | 40,75 | 0 |
| ENSG00000127580 | WDR24     | 16 | 684622    | 690444    | protein_coding | 40,73 | 0 |
| ENSG00000126262 | FFAR2     | 19 | 35443907  | 35451767  | protein_coding | 40,70 | 0 |
| ENSG00000042445 | RETSAT    | 2  | 85342088  | 85354620  | protein_coding | 40,67 | 0 |
| ENSG00000145861 | C1QTNF2   | 5  | 160347751 | 160370641 | protein_coding | 40,67 | 0 |
| ENSG00000204444 | APOM      | 6  | 31652416  | 31658210  | protein_coding | 40,66 | 0 |
| ENSG00000182154 | MRPL41    | 9  | 137551199 | 137552555 | protein_coding | 40,64 | 0 |
| ENSG00000158552 | ZFAND2B   | 2  | 219195237 | 219209651 | protein_coding | 40,63 | 0 |
| ENSG00000143952 | VPSS4     | 2  | 63892146  | 64019072  | protein_coding | 40,60 | 0 |
| ENSG00000164867 | NOS3      | 7  | 150990995 | 151014588 | protein_coding | 40,58 | 0 |
| ENSG00000152784 | PRDM8     | 4  | 80183879  | 80204329  | protein_coding | 40,57 | 0 |
| ENSG00000137478 | FCHSD2    | 11 | 72836745  | 73142261  | protein_coding | 40,56 | 0 |
| ENSG00000178718 | RPP25     | 15 | 74954416  | 74957464  | protein_coding | 40,50 | 0 |
| ENSG00000113209 | PCDHB5    | 5  | 141135218 | 141138625 | protein_coding | 40,50 | 0 |
| ENSG00000173369 | C1QB      | 1  | 22652762  | 22661538  | protein_coding | 40,50 | 0 |
| ENSG00000114423 | CBLB      | 3  | 105655461 | 105869552 | protein_coding | 40,49 | 0 |
| ENSG00000185386 | MAPK11    | 22 | 50263713  | 50270767  | protein_coding | 40,40 | 0 |
| ENSG00000080493 | SLC4A4    | 4  | 71187286  | 71572087  | protein_coding | 40,40 | 0 |
| ENSG00000161021 | MAML1     | 5  | 179732850 | 179796511 | protein_coding | 40,38 | 0 |
| ENSG00000146733 | PSPH      | 7  | 56011051  | 56051604  | protein_coding | 40,38 | 0 |
| ENSG00000112739 | PRPF4B    | 6  | 4021267   | 4064983   | protein_coding | 40,36 | 0 |
| ENSG00000141956 | PRDM15    | 21 | 41798225  | 41879482  | protein_coding | 40,35 | 0 |
| ENSG00000148343 | FAM73B    | 9  | 129036621 | 129072082 | protein_coding | 40,35 | 0 |
| ENSG00000186567 | CEACAM19  | 19 | 44662278  | 44684359  | protein_coding | 40,30 | 0 |

|                 |          |    |           |           |                |       |   |
|-----------------|----------|----|-----------|-----------|----------------|-------|---|
| ENSG00000169418 | NPR1     | 1  | 153678637 | 153693992 | protein_coding | 40,30 | 0 |
| ENSG00000129250 | KIF1C    | 17 | 4997948   | 5028401   | protein_coding | 40,29 | 0 |
| ENSG00000144746 | ARL6IP5  | 3  | 69084944  | 69106066  | protein_coding | 40,27 | 0 |
| ENSG00000138336 | TET1     | 10 | 68560656  | 68694482  | protein_coding | 40,25 | 0 |
| ENSG00000139631 | CSAD     | 12 | 53157663  | 53180909  | protein_coding | 40,23 | 0 |
| ENSG00000162585 | FAAP20   | 1  | 2184461   | 2212720   | protein_coding | 40,22 | 0 |
| ENSG00000203485 | INF2     | 14 | 104689606 | 104722535 | protein_coding | 40,19 | 0 |
| ENSG00000132481 | TRIM47   | 17 | 75874161  | 75878575  | protein_coding | 40,12 | 0 |
| ENSG00000167967 | E4F1     | 16 | 2223566   | 2235742   | protein_coding | 40,11 | 0 |
| ENSG00000149564 | ESAM     | 11 | 124752583 | 124762290 | protein_coding | 40,10 | 0 |
| ENSG00000134287 | ARF3     | 12 | 48935723  | 48957551  | protein_coding | 40,05 | 0 |
| ENSG00000023902 | PLEKHO1  | 1  | 150149183 | 150164720 | protein_coding | 39,97 | 0 |
| ENSG00000125818 | PSMF1    | 20 | 1113263   | 1189415   | protein_coding | 39,90 | 0 |
| ENSG00000187116 | LILRA5   | 19 | 54307070  | 54313139  | protein_coding | 39,90 | 0 |
| ENSG00000151062 | CACNA2D4 | 12 | 1791957   | 1918836   | protein_coding | 39,90 | 0 |
| ENSG00000188931 | CFAP126  | 1  | 161364731 | 161367874 | protein_coding | 39,89 | 0 |
| ENSG00000093144 | ECHDC1   | 6  | 127288710 | 127343609 | protein_coding | 39,87 | 0 |
| ENSG00000124181 | PLCG1    | 20 | 41136960  | 41196801  | protein_coding | 39,83 | 0 |
| ENSG00000139908 | TSSK4    | 14 | 24205697  | 24208362  | protein_coding | 39,80 | 0 |
| ENSG00000186642 | PDE2A    | 11 | 72576141  | 72674591  | protein_coding | 39,80 | 0 |
| ENSG00000142959 | BEST4    | 1  | 44783585  | 44787705  | protein_coding | 39,80 | 0 |
| ENSG00000010278 | CD9      | 12 | 6199715   | 6238271   | protein_coding | 39,78 | 0 |
| ENSG00000125846 | ZNF133   | 20 | 18288283  | 18316996  | protein_coding | 39,74 | 0 |
| ENSG00000141551 | CSNK1D   | 17 | 82239023  | 82273731  | protein_coding | 39,74 | 0 |
| ENSG00000156671 | SAMD8    | 10 | 75099586  | 75182123  | protein_coding | 39,71 | 0 |
| ENSG00000021461 | CYP3A43  | 7  | 99828013  | 99866102  | protein_coding | 39,70 | 0 |
| ENSG00000125912 | NCLN     | 19 | 3185563   | 3209575   | protein_coding | 39,65 | 0 |
| ENSG00000124257 | NEURL2   | 20 | 45888625  | 45891287  | protein_coding | 39,60 | 0 |
| ENSG00000188305 | C19orf35 | 19 | 2274622   | 2282176   | protein_coding | 39,60 | 0 |
| ENSG00000171161 | ZNF672   | 1  | 248838210 | 248849517 | protein_coding | 39,58 | 0 |
| ENSG00000141582 | CBX4     | 17 | 79833156  | 79839429  | protein_coding | 39,54 | 0 |
| ENSG00000100365 | NCF4     | 22 | 36860988  | 36878015  | protein_coding | 39,50 | 0 |
| ENSG00000177000 | MTHFR    | 1  | 11785723  | 11806920  | protein_coding | 39,49 | 0 |
| ENSG00000068383 | INPP5A   | 10 | 132537820 | 132783480 | protein_coding | 39,44 | 0 |
| ENSG00000250565 | ATP6V1E2 | 2  | 46490750  | 46542557  | protein_coding | 39,44 | 0 |
| ENSG00000130811 | EIF3G    | 19 | 10115017  | 10119918  | protein_coding | 39,42 | 0 |
| ENSG00000100100 | PIK3IP1  | 22 | 31281593  | 31292534  | protein_coding | 39,39 | 0 |
| ENSG00000167705 | RILP     | 17 | 1646145   | 1650077   | protein_coding | 39,38 | 0 |
| ENSG00000141084 | RANBP10  | 16 | 67723066  | 67806652  | protein_coding | 39,38 | 0 |
| ENSG00000101346 | POFUT1   | 20 | 32207880  | 32238667  | protein_coding | 39,38 | 0 |
| ENSG00000165898 | ISCA2    | 14 | 74493720  | 74497106  | protein_coding | 39,37 | 0 |
| ENSG00000168397 | ATG4B    | 2  | 241637213 | 241673857 | protein_coding | 39,31 | 0 |
| ENSG00000184730 | APOBR    | 16 | 28494649  | 28498970  | protein_coding | 39,30 | 0 |
| ENSG00000130725 | UBE2M    | 19 | 58555712  | 58558960  | protein_coding | 39,26 | 0 |
| ENSG00000002330 | BAD      | 11 | 64269830  | 64284704  | protein_coding | 39,24 | 0 |
| ENSG00000156150 | ALX3     | 1  | 110059994 | 110070700 | protein_coding | 39,21 | 0 |
| ENSG00000177989 | ODF3B    | 22 | 50529710  | 50532580  | protein_coding | 39,20 | 0 |
| ENSG00000105609 | LILRB5   | 19 | 54249431  | 54257301  | protein_coding | 39,20 | 0 |
| ENSG00000197599 | CCDC154  | 16 | 1434383   | 1444556   | protein_coding | 39,20 | 0 |
| ENSG00000184304 | PRKD1    | 14 | 29576479  | 30191898  | protein_coding | 39,20 | 0 |
| ENSG00000126733 | DACH2    | X  | 86148458  | 86832604  | protein_coding | 39,20 | 0 |
| ENSG00000100916 | BRMS1L   | 14 | 35826318  | 35932325  | protein_coding | 39,19 | 0 |
| ENSG00000169740 | ZNF32    | 10 | 43643859  | 43648856  | protein_coding | 39,14 | 0 |
| ENSG00000117419 | ERI3     | 1  | 44221070  | 44355260  | protein_coding | 39,13 | 0 |
| ENSG00000136718 | IMP4     | 2  | 130342225 | 130347810 | protein_coding | 39,13 | 0 |
| ENSG00000184898 | RBM43    | 2  | 151247940 | 151261879 | protein_coding | 39,07 | 0 |
| ENSG00000107882 | SUFU     | 10 | 102503987 | 102633535 | protein_coding | 39,02 | 0 |
| ENSG00000110852 | CLEC2B   | 12 | 9852984   | 9870136   | protein_coding | 39,00 | 0 |

|                 |            |    |           |           |                |       |   |
|-----------------|------------|----|-----------|-----------|----------------|-------|---|
| ENSG00000198722 | UNC13B     | 9  | 35161992  | 35405338  | protein_coding | 38,97 | 0 |
| ENSG00000119866 | BCL11A     | 2  | 60451167  | 60553567  | protein_coding | 38,94 | 0 |
| ENSG00000169682 | SPNS1      | 16 | 28974221  | 28984548  | protein_coding | 38,90 | 0 |
| ENSG00000111110 | PPM1H      | 12 | 62643982  | 62935037  | protein_coding | 38,84 | 0 |
| ENSG00000174586 | ZNF497     | 19 | 58354357  | 58362848  | protein_coding | 38,84 | 0 |
| ENSG00000280071 | ENSG000002 | 21 | 5079294   | 5128425   | protein_coding | 38,83 | 0 |
| ENSG00000254827 | SLC22A18AS | 11 | 2887780   | 2903740   | protein_coding | 38,80 | 0 |
| ENSG00000105248 | CCDC94     | 19 | 4247079   | 4269090   | protein_coding | 38,80 | 0 |
| ENSG00000110400 | PVRL1      | 11 | 119623408 | 119729084 | protein_coding | 38,79 | 0 |
| ENSG00000119318 | RAD23B     | 9  | 107283137 | 107332194 | protein_coding | 38,78 | 0 |
| ENSG00000188566 | NDOR1      | 9  | 137205670 | 137217009 | protein_coding | 38,73 | 0 |
| ENSG00000168612 | ZSWIM1     | 20 | 45881227  | 45885266  | protein_coding | 38,73 | 0 |
| ENSG00000057294 | PKP2       | 12 | 32790745  | 32896840  | protein_coding | 38,72 | 0 |
| ENSG00000123684 | LPGAT1     | 1  | 211743457 | 211830772 | protein_coding | 38,72 | 0 |
| ENSG00000101098 | RIMS4      | 20 | 44751808  | 44810338  | protein_coding | 38,72 | 0 |
| ENSG00000165152 | TMEM246    | 9  | 101473171 | 101533537 | protein_coding | 38,69 | 0 |
| ENSG00000198841 | KTI12      | 1  | 52032103  | 52033816  | protein_coding | 38,66 | 0 |
| ENSG00000197785 | ATAD3A     | 1  | 1512151   | 1534687   | protein_coding | 38,65 | 0 |
| ENSG00000120256 | LRP11      | 6  | 149818798 | 149864026 | protein_coding | 38,64 | 0 |
| ENSG00000160179 | ABCG1      | 21 | 42199689  | 42297244  | protein_coding | 38,60 | 0 |
| ENSG00000099622 | CIRBP      | 19 | 1259384   | 1274880   | protein_coding | 38,49 | 0 |
| ENSG00000148300 | REXO4      | 9  | 133406059 | 133418096 | protein_coding | 38,48 | 0 |
| ENSG00000082898 | XPO1       | 2  | 61477849  | 61538626  | protein_coding | 38,42 | 0 |
| ENSG00000144867 | SRPRB      | 3  | 133784033 | 133825772 | protein_coding | 38,42 | 0 |
| ENSG00000176533 | GNG7       | 19 | 2511219   | 2702709   | protein_coding | 38,42 | 0 |
| ENSG00000205765 | C5orf51    | 5  | 41904188  | 41921636  | protein_coding | 38,38 | 0 |
| ENSG00000065970 | FOXJ2      | 12 | 8032703   | 8055503   | protein_coding | 38,37 | 0 |
| ENSG00000242715 | CCDC169    | 13 | 36222008  | 36297840  | protein_coding | 38,36 | 0 |
| ENSG00000123636 | BAZZB      | 2  | 159318979 | 159616692 | protein_coding | 38,30 | 0 |
| ENSG00000090539 | CHRD       | 3  | 184380073 | 184390736 | protein_coding | 38,30 | 0 |
| ENSG00000144488 | ESPNL      | 2  | 238100157 | 238133287 | protein_coding | 38,30 | 0 |
| ENSG00000170802 | FOXN2      | 2  | 48314637  | 48379294  | protein_coding | 38,29 | 0 |
| ENSG00000196365 | LONP1      | 19 | 5691834   | 5720572   | protein_coding | 38,27 | 0 |
| ENSG00000184786 | TCTE3      | 6  | 169740114 | 169751587 | protein_coding | 38,23 | 0 |
| ENSG00000165092 | ALDH1A1    | 9  | 72900662  | 73080442  | protein_coding | 38,20 | 0 |
| ENSG00000154451 | GBP5       | 1  | 89258950  | 89272804  | protein_coding | 38,20 | 0 |
| ENSG00000112697 | TMEM30A    | 6  | 75252924  | 75284968  | protein_coding | 38,17 | 0 |
| ENSG00000127663 | KDM4B      | 19 | 4969113   | 5153595   | protein_coding | 38,14 | 0 |
| ENSG00000137133 | HINT2      | 9  | 35812960  | 35815354  | protein_coding | 38,12 | 0 |
| ENSG00000105245 | NUMBL      | 19 | 40665905  | 40690972  | protein_coding | 38,10 | 0 |
| ENSG00000206538 | VGLL3      | 3  | 86937969  | 86991119  | protein_coding | 38,10 | 0 |
| ENSG00000072682 | P4HA2      | 5  | 132191838 | 132295315 | protein_coding | 38,09 | 0 |
| ENSG00000151414 | NEK7       | 1  | 198156963 | 198322420 | protein_coding | 38,08 | 0 |
| ENSG00000127483 | HP1BP3     | 1  | 20742661  | 20787323  | protein_coding | 38,06 | 0 |
| ENSG00000161281 | COX7A1     | 19 | 36150922  | 36152869  | protein_coding | 38,00 | 0 |
| ENSG00000161664 | ASB16      | 17 | 44170447  | 44179083  | protein_coding | 38,00 | 0 |
| ENSG00000137752 | CASP1      | 11 | 105025443 | 105035250 | protein_coding | 38,00 | 0 |
| ENSG00000188573 | FBLL1      | 5  | 168529116 | 168530634 | protein_coding | 38,00 | 0 |
| ENSG00000144908 | ALDH1L1    | 3  | 126103562 | 126197994 | protein_coding | 38,00 | 0 |
| ENSG00000244482 | LILRA6     | 19 | 54236592  | 54242791  | protein_coding | 37,90 | 0 |
| ENSG00000214530 | STARD10    | 11 | 72754729  | 72794168  | protein_coding | 37,87 | 0 |
| ENSG00000145949 | MYLK4      | 6  | 2663629   | 2750966   | protein_coding | 37,83 | 0 |
| ENSG00000015285 | WAS        | X  | 48676596  | 48691427  | protein_coding | 37,80 | 0 |
| ENSG00000123562 | MORF4L2    | X  | 103675496 | 103688158 | protein_coding | 37,80 | 0 |
| ENSG00000167658 | EEF2       | 19 | 3976056   | 3985469   | protein_coding | 37,75 | 0 |
| ENSG00000103496 | STX4       | 16 | 31032889  | 31042975  | protein_coding | 37,74 | 0 |
| ENSG00000112796 | ENPP5      | 6  | 46159187  | 46170971  | protein_coding | 37,71 | 0 |
| ENSG00000165887 | ANKRD2     | 10 | 97572499  | 97583884  | protein_coding | 37,70 | 0 |

|                 |          |    |           |           |                |       |   |
|-----------------|----------|----|-----------|-----------|----------------|-------|---|
| ENSG00000204344 | STK19    | 6  | 31971091  | 31982821  | protein_coding | 37,69 | 0 |
| ENSG00000186431 | FCAR     | 19 | 54874248  | 54890472  | protein_coding | 37,60 | 0 |
| ENSG00000152270 | PDE3B    | 11 | 14643723  | 14872044  | protein_coding | 37,60 | 0 |
| ENSG00000128617 | OPN1SW   | 7  | 128772491 | 128775790 | protein_coding | 37,60 | 0 |
| ENSG00000204386 | NEU1     | 6  | 31857659  | 31862906  | protein_coding | 37,59 | 0 |
| ENSG00000120254 | MTHFD1L  | 6  | 150865549 | 151101887 | protein_coding | 37,57 | 0 |
| ENSG00000135632 | SMYD5    | 2  | 73214222  | 73227237  | protein_coding | 37,51 | 0 |
| ENSG00000028203 | VEZT     | 12 | 95217746  | 95302790  | protein_coding | 37,51 | 0 |
| ENSG00000105202 | FBL      | 19 | 39834458  | 39846414  | protein_coding | 37,50 | 0 |
| ENSG00000196911 | KPNA5    | 6  | 116681187 | 116741866 | protein_coding | 37,50 | 0 |
| ENSG00000110880 | CORO1C   | 12 | 108645109 | 108731596 | protein_coding | 37,50 | 0 |
| ENSG00000169733 | RFNG     | 17 | 82047902  | 82051831  | protein_coding | 37,49 | 0 |
| ENSG00000277258 | PCGF2    | 17 | 38733897  | 38749817  | protein_coding | 37,47 | 0 |
| ENSG00000214253 | FIS1     | 7  | 101239458 | 101252316 | protein_coding | 37,43 | 0 |
| ENSG00000114120 | SLC25A36 | 3  | 140941830 | 140979933 | protein_coding | 37,41 | 0 |
| ENSG00000253873 | PCDHGA11 | 5  | 141421047 | 141512979 | protein_coding | 37,40 | 0 |
| ENSG00000204851 | PNMAL2   | 19 | 46486906  | 46496498  | protein_coding | 37,36 | 0 |
| ENSG00000112319 | EYA4     | 6  | 133240598 | 133532120 | protein_coding | 37,35 | 0 |
| ENSG00000101558 | VAPA     | 18 | 9914002   | 9960021   | protein_coding | 37,34 | 0 |
| ENSG00000174483 | BBS1     | 11 | 66510606  | 66533627  | protein_coding | 37,31 | 0 |
| ENSG00000163814 | CDCP1    | 3  | 45082278  | 45146422  | protein_coding | 37,29 | 0 |
| ENSG00000163431 | LMOD1    | 1  | 201896452 | 201946588 | protein_coding | 37,20 | 0 |
| ENSG00000171222 | SCAND1   | 20 | 35953617  | 35959472  | protein_coding | 37,11 | 0 |
| ENSG00000198910 | L1CAM    | X  | 153861514 | 153909223 | protein_coding | 37,10 | 0 |
| ENSG00000081377 | CDC14B   | 9  | 96490241  | 96619830  | protein_coding | 37,08 | 0 |
| ENSG00000257315 | ZBED6    | 1  | 203796309 | 203800558 | protein_coding | 37,03 | 0 |
| ENSG00000197363 | ZNF517   | 8  | 144798876 | 144811169 | protein_coding | 37,01 | 0 |
| ENSG00000146192 | FGD2     | 6  | 37005646  | 37029070  | protein_coding | 37,00 | 0 |
| ENSG00000182324 | KCNJ14   | 19 | 48455509  | 48466980  | protein_coding | 36,96 | 0 |
| ENSG00000186889 | TMEM17   | 2  | 62500221  | 62511894  | protein_coding | 36,93 | 0 |
| ENSG00000105679 | GAPDHS   | 19 | 35533412  | 35545316  | protein_coding | 36,90 | 0 |
| ENSG00000136807 | CDK9     | 9  | 127785679 | 127790787 | protein_coding | 36,84 | 0 |
| ENSG00000181444 | ZNF467   | 7  | 149764182 | 149773479 | protein_coding | 36,82 | 0 |
| ENSG00000111906 | HDDC2    | 6  | 125219962 | 125302078 | protein_coding | 36,82 | 0 |
| ENSG00000128272 | ATF4     | 22 | 39519695  | 39522685  | protein_coding | 36,79 | 0 |
| ENSG00000080189 | SLC35C2  | 20 | 46345980  | 46364458  | protein_coding | 36,77 | 0 |
| ENSG00000142186 | SCYL1    | 11 | 65525077  | 65538704  | protein_coding | 36,75 | 0 |
| ENSG00000179912 | R3HDM2   | 12 | 57253762  | 57431005  | protein_coding | 36,72 | 0 |
| ENSG00000197608 | ZNF841   | 19 | 52064466  | 52095765  | protein_coding | 36,70 | 0 |
| ENSG00000113621 | TXNDC15  | 5  | 134873803 | 134901525 | protein_coding | 36,67 | 0 |
| ENSG00000038002 | AGA      | 4  | 177430770 | 177442503 | protein_coding | 36,63 | 0 |
| ENSG00000105559 | PLEKHA4  | 19 | 48837097  | 48868632  | protein_coding | 36,62 | 0 |
| ENSG00000087076 | HSD17B14 | 19 | 48813017  | 48836678  | protein_coding | 36,61 | 0 |
| ENSG00000170835 | CEL      | 9  | 133061978 | 133087355 | protein_coding | 36,60 | 0 |
| ENSG00000165061 | ZMAT4    | 8  | 40530590  | 40897833  | protein_coding | 36,60 | 0 |
| ENSG00000027847 | B4GALT7  | 5  | 177600100 | 177610347 | protein_coding | 36,56 | 0 |
| ENSG00000163738 | MTHFD2L  | 4  | 74114174  | 74303099  | protein_coding | 36,55 | 0 |
| ENSG00000152467 | ZSCAN1   | 19 | 58034032  | 58054631  | protein_coding | 36,55 | 0 |
| ENSG00000119616 | FCF1     | 14 | 74713144  | 74738620  | protein_coding | 36,54 | 0 |
| ENSG00000111087 | GLI1     | 12 | 57460135  | 57472262  | protein_coding | 36,50 | 0 |
| ENSG00000133574 | GIMAP4   | 7  | 150567277 | 150573955 | protein_coding | 36,50 | 0 |
| ENSG00000101158 | NELFCD   | 20 | 58981208  | 58995133  | protein_coding | 36,49 | 0 |
| ENSG00000136631 | VPS45    | 1  | 150067293 | 150145327 | protein_coding | 36,47 | 0 |
| ENSG00000138380 | CARF     | 2  | 202912214 | 202987063 | protein_coding | 36,45 | 0 |
| ENSG00000077463 | SIRT6    | 19 | 4174109   | 4182604   | protein_coding | 36,44 | 0 |
| ENSG00000158669 | GPAT4    | 8  | 41577187  | 41625001  | protein_coding | 36,42 | 0 |
| ENSG00000184716 | SERINC4  | 15 | 43794162  | 43800221  | protein_coding | 36,37 | 0 |
| ENSG00000127990 | SGCE     | 7  | 94585230  | 94656209  | protein_coding | 36,36 | 0 |

|                 |           |    |           |           |                |       |   |
|-----------------|-----------|----|-----------|-----------|----------------|-------|---|
| ENSG00000244617 | ASPRV1    | 2  | 69960089  | 69962265  | protein_coding | 36,30 | 0 |
| ENSG00000077684 | JADE1     | 4  | 128809623 | 128875224 | protein_coding | 36,29 | 0 |
| ENSG00000160117 | ANKLE1    | 19 | 17281645  | 17287646  | protein_coding | 36,27 | 0 |
| ENSG00000135924 | DNAJB2    | 2  | 219279267 | 219286900 | protein_coding | 36,25 | 0 |
| ENSG00000145362 | ANK2      | 4  | 112818109 | 113383740 | protein_coding | 36,23 | 0 |
| ENSG00000108774 | RAB5C     | 17 | 42124976  | 42155044  | protein_coding | 36,22 | 0 |
| ENSG00000007080 | CCDC124   | 19 | 17933016  | 17943991  | protein_coding | 36,15 | 0 |
| ENSG00000184887 | BTBD6     | 14 | 105248490 | 105251093 | protein_coding | 36,14 | 0 |
| ENSG00000113532 | ST8SIA4   | 5  | 100806935 | 100903266 | protein_coding | 36,12 | 0 |
| ENSG00000101363 | MANBAL    | 20 | 37289638  | 37317260  | protein_coding | 36,12 | 0 |
| ENSG00000177380 | PPFIA3    | 19 | 49119389  | 49151026  | protein_coding | 36,09 | 0 |
| ENSG00000136371 | MTHFS     | 15 | 79833585  | 79897379  | protein_coding | 36,09 | 0 |
| ENSG00000004142 | POLDIP2   | 17 | 28347177  | 28357522  | protein_coding | 36,09 | 0 |
| ENSG00000167595 | PROSER3   | 19 | 35758143  | 35771028  | protein_coding | 36,07 | 0 |
| ENSG00000143412 | ANXA9     | 1  | 150982017 | 150995634 | protein_coding | 36,00 | 0 |
| ENSG00000170425 | ADORA2B   | 17 | 15944917  | 15975746  | protein_coding | 35,96 | 0 |
| ENSG00000166444 | ST5       | 11 | 8693351   | 8910951   | protein_coding | 35,95 | 0 |
| ENSG00000157764 | BRAF      | 7  | 140719327 | 140924764 | protein_coding | 35,91 | 0 |
| ENSG00000133321 | RARRES3   | 11 | 63536809  | 63546462  | protein_coding | 35,91 | 0 |
| ENSG00000117091 | CD48      | 1  | 160678746 | 160711851 | protein_coding | 35,90 | 0 |
| ENSG00000105325 | FZR1      | 19 | 3506273   | 3538330   | protein_coding | 35,90 | 0 |
| ENSG00000113070 | HBEGF     | 5  | 140332843 | 140346631 | protein_coding | 35,86 | 0 |
| ENSG00000164053 | ATRIP     | 3  | 48446710  | 48465716  | protein_coding | 35,85 | 0 |
| ENSG00000169230 | PRELID1   | 5  | 177303774 | 177306959 | protein_coding | 35,80 | 0 |
| ENSG00000173068 | BNC2      | 9  | 16409503  | 16870843  | protein_coding | 35,76 | 0 |
| ENSG00000064995 | TAF11     | 6  | 34877778  | 34888089  | protein_coding | 35,72 | 0 |
| ENSG00000105976 | MET       | 7  | 116672390 | 116798386 | protein_coding | 35,71 | 0 |
| ENSG00000178741 | COX5A     | 15 | 74919791  | 74938168  | protein_coding | 35,71 | 0 |
| ENSG00000125845 | BMP2      | 20 | 6767664   | 6780280   | protein_coding | 35,70 | 0 |
| ENSG00000198829 | SUCNR1    | 3  | 151873643 | 151884619 | protein_coding | 35,70 | 0 |
| ENSG00000181555 | SETD2     | 3  | 47016429  | 47163967  | protein_coding | 35,69 | 0 |
| ENSG00000167994 | RAB3IL1   | 11 | 61897301  | 61920269  | protein_coding | 35,68 | 0 |
| ENSG00000112624 | GLTSCR1L  | 6  | 42746958  | 42868560  | protein_coding | 35,68 | 0 |
| ENSG00000171604 | CXXC5     | 5  | 139647299 | 139683882 | protein_coding | 35,66 | 0 |
| ENSG00000035862 | TIMP2     | 17 | 78852977  | 78925387  | protein_coding | 35,64 | 0 |
| ENSG00000178922 | HYI       | 1  | 43451003  | 43453989  | protein_coding | 35,63 | 0 |
| ENSG00000198917 | C9orf114  | 9  | 128819651 | 128829821 | protein_coding | 35,60 | 0 |
| ENSG00000177453 | NIM1K     | 5  | 43192071  | 43280850  | protein_coding | 35,60 | 0 |
| ENSG00000091879 | ANGPT2    | 8  | 6499651   | 6563409   | protein_coding | 35,56 | 0 |
| ENSG00000105538 | RASIP1    | 19 | 48720587  | 48740721  | protein_coding | 35,56 | 0 |
| ENSG00000159399 | HK2       | 2  | 74833981  | 74893359  | protein_coding | 35,55 | 0 |
| ENSG00000146904 | EPHA1     | 7  | 143390289 | 143408892 | protein_coding | 35,50 | 0 |
| ENSG00000148362 | C9orf142  | 9  | 136992418 | 136993984 | protein_coding | 35,45 | 0 |
| ENSG00000163251 | FZD5      | 2  | 207762586 | 207769563 | protein_coding | 35,45 | 0 |
| ENSG00000100372 | SLC25A17  | 22 | 40769630  | 40819399  | protein_coding | 35,42 | 0 |
| ENSG00000205710 | C17orf107 | 17 | 4899418   | 4902932   | protein_coding | 35,40 | 0 |
| ENSG00000064601 | CTSA      | 20 | 45890144  | 45898820  | protein_coding | 35,36 | 0 |
| ENSG00000133313 | CNDP2     | 18 | 74495816  | 74523454  | protein_coding | 35,35 | 0 |
| ENSG00000117500 | TMED5     | 1  | 93149742  | 93180728  | protein_coding | 35,33 | 0 |
| ENSG00000140379 | BCL2A1    | 15 | 79960889  | 79971446  | protein_coding | 35,30 | 0 |
| ENSG00000167363 | FN3K      | 17 | 82735575  | 82751197  | protein_coding | 35,30 | 0 |
| ENSG00000149016 | TUT1      | 11 | 62575045  | 62592177  | protein_coding | 35,29 | 0 |
| ENSG00000001561 | ENPP4     | 6  | 46129993  | 46146699  | protein_coding | 35,29 | 0 |
| ENSG00000087253 | LPCAT2    | 16 | 55508998  | 55586670  | protein_coding | 35,26 | 0 |
| ENSG00000149294 | NCAM1     | 11 | 112961247 | 113278436 | protein_coding | 35,21 | 0 |
| ENSG00000162461 | SLC25A34  | 1  | 15736405  | 15741396  | protein_coding | 35,20 | 0 |
| ENSG00000137817 | PARP6     | 15 | 72241181  | 72272999  | protein_coding | 35,20 | 0 |
| ENSG00000243566 | UPK3B     | 7  | 76510428  | 76516521  | protein_coding | 35,20 | 0 |



|                 |            |    |           |           |                |       |   |
|-----------------|------------|----|-----------|-----------|----------------|-------|---|
| ENSG00000146281 | PM20D2     | 6  | 89146050  | 89165565  | protein_coding | 35,16 | 0 |
| ENSG00000172081 | MOB3A      | 19 | 2071038   | 2096673   | protein_coding | 35,15 | 0 |
| ENSG00000119669 | IRF2BPL    | 14 | 77024543  | 77028699  | protein_coding | 35,14 | 0 |
| ENSG00000278828 | HIST1H3H   | 6  | 27810064  | 27811300  | protein_coding | 35,10 | 0 |
| ENSG00000105443 | CYTH2      | 19 | 48469032  | 48482314  | protein_coding | 35,08 | 0 |
| ENSG00000139719 | VPS33A     | 12 | 122229564 | 122266521 | protein_coding | 35,08 | 0 |
| ENSG00000161791 | FMNL3      | 12 | 49636499  | 49708165  | protein_coding | 35,07 | 0 |
| ENSG00000108465 | CDK5RAP3   | 17 | 47967810  | 47981774  | protein_coding | 35,05 | 0 |
| ENSG00000165006 | UBAP1      | 9  | 34179005  | 34252523  | protein_coding | 35,01 | 0 |
| ENSG00000196136 | SERPINA3   | 14 | 94612384  | 94624055  | protein_coding | 35,00 | 0 |
| ENSG00000122965 | RBM19      | 12 | 113816738 | 113966371 | protein_coding | 34,99 | 0 |
| ENSG00000011132 | APBA3      | 19 | 3750819   | 3761699   | protein_coding | 34,98 | 0 |
| ENSG00000104331 | IMPAD1     | 8  | 56957933  | 56993844  | protein_coding | 34,98 | 0 |
| ENSG00000174276 | ZNHIT2     | 11 | 65116403  | 65117708  | protein_coding | 34,93 | 0 |
| ENSG00000172780 | RAB43      | 3  | 129087569 | 129122801 | protein_coding | 34,91 | 0 |
| ENSG00000142347 | MYO1F      | 19 | 8520790   | 8577577   | protein_coding | 34,84 | 0 |
| ENSG00000204084 | INPP5B     | 1  | 37860697  | 37947057  | protein_coding | 34,75 | 0 |
| ENSG00000242265 | PEG10      | 7  | 94656325  | 94669695  | protein_coding | 34,75 | 0 |
| ENSG00000140749 | IGSF6      | 16 | 21639537  | 21652660  | protein_coding | 34,71 | 0 |
| ENSG00000134061 | CD180      | 5  | 67179613  | 67196799  | protein_coding | 34,70 | 0 |
| ENSG00000109046 | WSB1       | 17 | 27294076  | 27315926  | protein_coding | 34,66 | 0 |
| ENSG00000070831 | CDC42      | 1  | 22052627  | 22092946  | protein_coding | 34,64 | 0 |
| ENSG00000100442 | FKBP3      | 14 | 45115600  | 45135319  | protein_coding | 34,62 | 0 |
| ENSG00000167685 | ZNF444     | 19 | 56132599  | 56160893  | protein_coding | 34,62 | 0 |
| ENSG00000130173 | C19orf80   | 19 | 11237450  | 11241943  | protein_coding | 34,60 | 0 |
| ENSG00000144597 | EAF1       | 3  | 15427355  | 15450635  | protein_coding | 34,56 | 0 |
| ENSG00000135956 | TMEM127    | 2  | 96248516  | 96265994  | protein_coding | 34,55 | 0 |
| ENSG00000007376 | RPUSD1     | 16 | 784974    | 788397    | protein_coding | 34,52 | 0 |
| ENSG00000196187 | TMEM63A    | 1  | 225845536 | 225882369 | protein_coding | 34,51 | 0 |
| ENSG00000254505 | CHMP4A     | 14 | 24209583  | 24213869  | protein_coding | 34,50 | 0 |
| ENSG00000243660 | ZNF487     | 10 | 43436841  | 43483179  | protein_coding | 34,48 | 0 |
| ENSG00000178971 | CTC1       | 17 | 8224821   | 8248044   | protein_coding | 34,46 | 0 |
| ENSG00000115257 | PCSK4      | 19 | 1481428   | 1490752   | protein_coding | 34,46 | 0 |
| ENSG00000112561 | TFEB       | 6  | 41683978  | 41736259  | protein_coding | 34,46 | 0 |
| ENSG00000136861 | CDK5RAP2   | 9  | 120388869 | 120580170 | protein_coding | 34,44 | 0 |
| ENSG00000163703 | CRELD1     | 3  | 9933822   | 9945413   | protein_coding | 34,44 | 0 |
| ENSG00000132109 | TRIM21     | 11 | 4384897   | 4393696   | protein_coding | 34,42 | 0 |
| ENSG00000164463 | CREBRF     | 5  | 173056352 | 173139284 | protein_coding | 34,41 | 0 |
| ENSG00000167968 | DNASE1L2   | 16 | 2235816   | 2238711   | protein_coding | 34,40 | 0 |
| ENSG00000084754 | HADHA      | 2  | 26190635  | 26244726  | protein_coding | 34,36 | 0 |
| ENSG00000166313 | APBB1      | 11 | 6395124   | 6419414   | protein_coding | 34,35 | 0 |
| ENSG00000182768 | NGRN       | 15 | 90265659  | 90278141  | protein_coding | 34,33 | 0 |
| ENSG00000069702 | TGFBR3     | 1  | 91680343  | 91906335  | protein_coding | 34,31 | 0 |
| ENSG00000141522 | ARHGDI A   | 17 | 81867721  | 81871406  | protein_coding | 34,26 | 0 |
| ENSG00000171262 | FAM98B     | 15 | 38454127  | 38487710  | protein_coding | 34,26 | 0 |
| ENSG00000182872 | RBM10      | X  | 47144869  | 47186813  | protein_coding | 34,23 | 0 |
| ENSG00000095059 | DHPS       | 19 | 12675717  | 12681902  | protein_coding | 34,23 | 0 |
| ENSG00000279508 | ENSG000002 | 14 | 19300177  | 19302924  | protein_coding | 34,18 | 0 |
| ENSG00000114473 | IQCG       | 3  | 197889075 | 197960142 | protein_coding | 34,16 | 0 |
| ENSG00000091436 | ENSG000000 | 2  | 173075435 | 173268010 | protein_coding | 34,13 | 0 |
| ENSG00000197816 | CCDC180    | 9  | 97307304  | 97378524  | protein_coding | 34,13 | 0 |
| ENSG00000124104 | SNX21      | 20 | 45833810  | 45843275  | protein_coding | 34,13 | 0 |
| ENSG00000181418 | DDN        | 12 | 48995149  | 48999309  | protein_coding | 34,10 | 0 |
| ENSG00000166343 | MSS51      | 10 | 73423579  | 73433561  | protein_coding | 34,10 | 0 |
| ENSG00000112406 | HECA       | 6  | 139135112 | 139180802 | protein_coding | 34,07 | 0 |
| ENSG00000205323 | SARNP      | 12 | 55752463  | 55817756  | protein_coding | 34,06 | 0 |
| ENSG00000005884 | ITGA3      | 17 | 50055968  | 50090481  | protein_coding | 34,06 | 0 |
| ENSG00000179218 | CALR       | 19 | 12938578  | 12944489  | protein_coding | 34,05 | 0 |

|                 |          |    |           |           |                |       |   |
|-----------------|----------|----|-----------|-----------|----------------|-------|---|
| ENSG00000165806 | CASP7    | 10 | 113679162 | 113730907 | protein_coding | 34,01 | 0 |
| ENSG00000122861 | PLAU     | 10 | 73909177  | 73917497  | protein_coding | 34,00 | 0 |
| ENSG00000166510 | CCDC68   | 18 | 54901509  | 54959508  | protein_coding | 34,00 | 0 |
| ENSG00000002745 | WNT16    | 7  | 121325367 | 121341104 | protein_coding | 34,00 | 0 |
| ENSG00000173376 | NDNF     | 4  | 121035613 | 121073021 | protein_coding | 34,00 | 0 |
| ENSG00000135917 | SLC19A3  | 2  | 227685210 | 227718012 | protein_coding | 34,00 | 0 |
| ENSG00000189164 | ZNF527   | 19 | 37371061  | 37393066  | protein_coding | 33,98 | 0 |
| ENSG00000145012 | LPP      | 3  | 188153284 | 188890671 | protein_coding | 33,95 | 0 |
| ENSG00000130164 | LDLR     | 19 | 11089362  | 11133816  | protein_coding | 33,89 | 0 |
| ENSG00000154127 | UBASH3B  | 11 | 122655675 | 122814473 | protein_coding | 33,88 | 0 |
| ENSG00000100284 | TOM1     | 22 | 35299275  | 35347994  | protein_coding | 33,83 | 0 |
| ENSG00000159263 | SIM2     | 21 | 36699133  | 36749917  | protein_coding | 33,82 | 0 |
| ENSG00000203734 | ECT2L    | 6  | 138795926 | 138904070 | protein_coding | 33,82 | 0 |
| ENSG00000087095 | NLK      | 17 | 28041737  | 28196381  | protein_coding | 33,75 | 0 |
| ENSG00000257727 | CNPY2    | 12 | 56309842  | 56316336  | protein_coding | 33,74 | 0 |
| ENSG00000109220 | CHIC2    | 4  | 54009789  | 54064690  | protein_coding | 33,70 | 0 |
| ENSG00000049883 | PTCD2    | 5  | 72320367  | 72368395  | protein_coding | 33,69 | 0 |
| ENSG00000188277 | C15orf62 | 15 | 40770080  | 40772449  | protein_coding | 33,64 | 0 |
| ENSG00000101596 | SMCHD1   | 18 | 2655738   | 2805017   | protein_coding | 33,60 | 0 |
| ENSG00000165985 | C1QL3    | 10 | 16513743  | 16522005  | protein_coding | 33,60 | 0 |
| ENSG00000043591 | ADRB1    | 10 | 114044056 | 114046908 | protein_coding | 33,58 | 0 |
| ENSG00000077549 | CAPZB    | 1  | 19338776  | 19485539  | protein_coding | 33,57 | 0 |
| ENSG00000005889 | ZFX      | X  | 24149173  | 24216255  | protein_coding | 33,54 | 0 |
| ENSG00000161203 | AP2M1    | 3  | 184174689 | 184184091 | protein_coding | 33,52 | 0 |
| ENSG00000180098 | TRNAU1AP | 1  | 28553085  | 28578545  | protein_coding | 33,49 | 0 |
| ENSG00000102103 | PQBP1    | X  | 48897912  | 48903143  | protein_coding | 33,48 | 0 |
| ENSG00000163082 | SGPP2    | 2  | 222424517 | 222560948 | protein_coding | 33,48 | 0 |
| ENSG00000175197 | DDIT3    | 12 | 57516588  | 57520517  | protein_coding | 33,47 | 0 |
| ENSG00000173818 | ENDOV    | 17 | 80415165  | 80438086  | protein_coding | 33,47 | 0 |
| ENSG00000196588 | MKL1     | 22 | 40410281  | 40636702  | protein_coding | 33,44 | 0 |
| ENSG00000130304 | SLC27A1  | 19 | 17468769  | 17506168  | protein_coding | 33,44 | 0 |
| ENSG00000198576 | ARC      | 8  | 142611044 | 142614472 | protein_coding | 33,40 | 0 |
| ENSG00000116299 | KIAA1324 | 1  | 109113679 | 109206781 | protein_coding | 33,40 | 0 |
| ENSG00000204071 | TCEAL6   | X  | 102140476 | 102142970 | protein_coding | 33,40 | 0 |
| ENSG00000177728 | TMEM94   | 17 | 75441159  | 75500090  | protein_coding | 33,38 | 0 |
| ENSG00000138674 | SEC31A   | 4  | 82818661  | 82901166  | protein_coding | 33,36 | 0 |
| ENSG00000133316 | WDR74    | 11 | 62832342  | 62841809  | protein_coding | 33,36 | 0 |
| ENSG00000069667 | RORA     | 15 | 60488284  | 61229319  | protein_coding | 33,34 | 0 |
| ENSG00000065911 | MTHFD2   | 2  | 74198562  | 74217565  | protein_coding | 33,34 | 0 |
| ENSG00000141759 | TXNL4A   | 18 | 79970811  | 80033949  | protein_coding | 33,33 | 0 |
| ENSG00000116194 | ANGPTL1  | 1  | 178849705 | 178871052 | protein_coding | 33,31 | 0 |
| ENSG00000054277 | OPN3     | 1  | 241590102 | 241677376 | protein_coding | 33,31 | 0 |
| ENSG00000144591 | GMPPA    | 2  | 219498867 | 219506989 | protein_coding | 33,28 | 0 |
| ENSG00000107404 | DVL1     | 1  | 1335276   | 1349350   | protein_coding | 33,27 | 0 |
| ENSG00000125388 | GRK4     | 4  | 2963608   | 3040747   | protein_coding | 33,26 | 0 |
| ENSG00000068438 | FTSJ1    | X  | 48476021  | 48486364  | protein_coding | 33,25 | 0 |
| ENSG00000204577 | LILRB3   | 19 | 54216278  | 54223506  | protein_coding | 33,25 | 0 |
| ENSG00000173480 | ZNF417   | 19 | 57900296  | 57916610  | protein_coding | 33,23 | 0 |
| ENSG00000204179 | PTPN20   | 10 | 46911396  | 47002488  | protein_coding | 33,23 | 0 |
| ENSG00000198113 | TOR4A    | 9  | 137277749 | 137282641 | protein_coding | 33,20 | 0 |
| ENSG00000130208 | APOC1    | 19 | 44914247  | 44919349  | protein_coding | 33,17 | 0 |
| ENSG00000084070 | SMAP2    | 1  | 40344850  | 40423326  | protein_coding | 33,16 | 0 |
| ENSG00000255423 | EBLN2    | 3  | 73061659  | 73063337  | protein_coding | 33,13 | 0 |
| ENSG00000160767 | FAM189B  | 1  | 155247205 | 155255483 | protein_coding | 33,10 | 0 |
| ENSG00000185633 | NDUFA4L2 | 12 | 57234903  | 57240715  | protein_coding | 33,10 | 0 |
| ENSG00000172733 | PURG     | 8  | 30995802  | 31033715  | protein_coding | 33,10 | 0 |
| ENSG00000154342 | WNT3A    | 1  | 228007051 | 228061260 | protein_coding | 33,10 | 0 |
| ENSG00000123472 | ATPAF1   | 1  | 46632737  | 46673867  | protein_coding | 33,10 | 0 |

|                 |           |    |           |           |                |       |   |
|-----------------|-----------|----|-----------|-----------|----------------|-------|---|
| ENSG00000215305 | VPS16     | 20 | 2840703   | 2866732   | protein_coding | 33,09 | 0 |
| ENSG00000186501 | TMEM222   | 1  | 27322145  | 27336400  | protein_coding | 33,07 | 0 |
| ENSG00000221823 | PPP3R1    | 2  | 68178857  | 68256237  | protein_coding | 33,07 | 0 |
| ENSG00000023445 | BIRC3     | 11 | 102317450 | 102339403 | protein_coding | 33,06 | 0 |
| ENSG00000100075 | SLC25A1   | 22 | 19175575  | 19178830  | protein_coding | 33,04 | 0 |
| ENSG00000141497 | ZMYND15   | 17 | 4740015   | 4746119   | protein_coding | 33,00 | 0 |
| ENSG00000204323 | SMIM5     | 17 | 75633434  | 75641404  | protein_coding | 33,00 | 0 |
| ENSG00000087245 | MMP2      | 16 | 55389700  | 55506691  | protein_coding | 33,00 | 0 |
| ENSG00000181722 | ZBTB20    | 3  | 114338094 | 115147271 | protein_coding | 33,00 | 0 |
| ENSG00000124155 | PIGT      | 20 | 45416077  | 45426244  | protein_coding | 33,00 | 0 |
| ENSG00000169221 | TBC1D10B  | 16 | 30357102  | 30370264  | protein_coding | 32,98 | 0 |
| ENSG00000141560 | FN3KRP    | 17 | 82716683  | 82730328  | protein_coding | 32,96 | 0 |
| ENSG00000110721 | CHKA      | 11 | 68052859  | 68121444  | protein_coding | 32,95 | 0 |
| ENSG00000135930 | EIF4E2    | 2  | 232550052 | 232583644 | protein_coding | 32,92 | 0 |
| ENSG00000143420 | ENSA      | 1  | 150600851 | 150629612 | protein_coding | 32,90 | 0 |
| ENSG00000172183 | ISG20     | 15 | 88636153  | 88656483  | protein_coding | 32,90 | 0 |
| ENSG00000183060 | LYSMD4    | 15 | 99715697  | 99733561  | protein_coding | 32,90 | 0 |
| ENSG00000069431 | ABCC9     | 12 | 21797401  | 21941402  | protein_coding | 32,90 | 0 |
| ENSG00000143545 | RAB13     | 1  | 153981617 | 153986358 | protein_coding | 32,90 | 0 |
| ENSG00000136449 | MYCBPAP   | 17 | 50508384  | 50531501  | protein_coding | 32,87 | 0 |
| ENSG00000242372 | EIF6      | 20 | 35278907  | 35284985  | protein_coding | 32,86 | 0 |
| ENSG00000136908 | DPM2      | 9  | 127935099 | 127938484 | protein_coding | 32,84 | 0 |
| ENSG00000099331 | MYO9B     | 19 | 17075781  | 17214537  | protein_coding | 32,81 | 0 |
| ENSG00000167851 | CD300A    | 17 | 74466416  | 74484796  | protein_coding | 32,80 | 0 |
| ENSG00000173597 | SULT1B1   | 4  | 69721162  | 69787961  | protein_coding | 32,80 | 0 |
| ENSG00000121807 | CCR2      | 3  | 46353734  | 46360928  | protein_coding | 32,80 | 0 |
| ENSG00000188582 | PAQR9     | 3  | 142949164 | 142963682 | protein_coding | 32,80 | 0 |
| ENSG00000186395 | KRT10     | 17 | 40818117  | 40822595  | protein_coding | 32,79 | 0 |
| ENSG00000184792 | OSBP2     | 22 | 30693782  | 30907824  | protein_coding | 32,78 | 0 |
| ENSG00000160051 | IQCC      | 1  | 32205661  | 32208687  | protein_coding | 32,75 | 0 |
| ENSG00000063176 | SPHK2     | 19 | 48619291  | 48630717  | protein_coding | 32,72 | 0 |
| ENSG00000101542 | CDH20     | 18 | 61333582  | 61555773  | protein_coding | 32,70 | 0 |
| ENSG00000169413 | RNASE6    | 14 | 20781051  | 20782467  | protein_coding | 32,70 | 0 |
| ENSG00000164695 | CHMP4C    | 8  | 81732434  | 81759515  | protein_coding | 32,70 | 0 |
| ENSG00000196972 | SMIM10L2B | X  | 135095028 | 135098634 | protein_coding | 32,70 | 0 |
| ENSG00000221955 | SLC12A8   | 3  | 125082636 | 125212864 | protein_coding | 32,67 | 0 |
| ENSG00000134987 | WDR36     | 5  | 111091716 | 111130502 | protein_coding | 32,67 | 0 |
| ENSG00000196367 | TRRAP     | 7  | 98877933  | 99013243  | protein_coding | 32,66 | 0 |
| ENSG00000241370 | RPP21     | 6  | 30345131  | 30346884  | protein_coding | 32,64 | 0 |
| ENSG00000058091 | CDK14     | 7  | 90466424  | 91210590  | protein_coding | 32,61 | 0 |
| ENSG00000122218 | COPA      | 1  | 160289273 | 160343400 | protein_coding | 32,61 | 0 |
| ENSG00000106003 | LFNG      | 7  | 2512529   | 2529177   | protein_coding | 32,60 | 0 |
| ENSG00000178996 | SNX18     | 5  | 54517759  | 54546585  | protein_coding | 32,57 | 0 |
| ENSG00000165119 | HNRNPK    | 9  | 83968083  | 83980616  | protein_coding | 32,57 | 0 |
| ENSG00000148335 | NTMT1     | 9  | 129608884 | 129636131 | protein_coding | 32,56 | 0 |
| ENSG00000101307 | SIRPB1    | 20 | 1563521   | 1620061   | protein_coding | 32,55 | 0 |
| ENSG00000256771 | ZNF253    | 19 | 19865886  | 19894674  | protein_coding | 32,55 | 0 |
| ENSG00000089693 | MLF2      | 12 | 6747996   | 6767475   | protein_coding | 32,52 | 0 |
| ENSG00000151806 | GUF1      | 4  | 44678427  | 44700926  | protein_coding | 32,51 | 0 |
| ENSG00000153560 | UBP1      | 3  | 33388336  | 33441371  | protein_coding | 32,48 | 0 |
| ENSG00000087111 | PIGS      | 17 | 28553383  | 28571872  | protein_coding | 32,46 | 0 |
| ENSG00000172009 | THOP1     | 19 | 2785460   | 2815807   | protein_coding | 32,46 | 0 |
| ENSG00000116199 | FAM20B    | 1  | 179025804 | 179076562 | protein_coding | 32,44 | 0 |
| ENSG00000115085 | ZAP70     | 2  | 97713560  | 97739862  | protein_coding | 32,40 | 0 |
| ENSG00000136026 | CKAP4     | 12 | 106237877 | 106304279 | protein_coding | 32,39 | 0 |
| ENSG00000154654 | NCAM2     | 21 | 20998315  | 21543329  | protein_coding | 32,33 | 0 |
| ENSG00000175309 | PHYKPL    | 5  | 178208497 | 178232791 | protein_coding | 32,32 | 0 |
| ENSG00000151726 | ACSL1     | 4  | 184755595 | 184826818 | protein_coding | 32,32 | 0 |

|                 |                 |    |           |           |                |       |   |
|-----------------|-----------------|----|-----------|-----------|----------------|-------|---|
| ENSG00000186166 | CCDC84          | 11 | 118998142 | 119015791 | protein_coding | 32,31 | 0 |
| ENSG00000089775 | ZBTB25          | 14 | 64449106  | 64505213  | protein_coding | 32,31 | 0 |
| ENSG00000069869 | NEDD4           | 15 | 55826922  | 55993746  | protein_coding | 32,30 | 0 |
| ENSG00000101605 | MYOM1           | 18 | 3066807   | 3220108   | protein_coding | 32,30 | 0 |
| ENSG00000121310 | ECHDC2          | 1  | 52895910  | 52927212  | protein_coding | 32,27 | 0 |
| ENSG00000159423 | ALDH4A1         | 1  | 18871430  | 18902781  | protein_coding | 32,27 | 0 |
| ENSG00000103051 | COG4            | 16 | 70480568  | 70523565  | protein_coding | 32,25 | 0 |
| ENSG00000114767 | RRP9            | 3  | 51933430  | 51941941  | protein_coding | 32,24 | 0 |
| ENSG00000148204 | CRB2            | 9  | 123356170 | 123380324 | protein_coding | 32,24 | 0 |
| ENSG00000113648 | H2AFY           | 5  | 135333900 | 135399914 | protein_coding | 32,23 | 0 |
| ENSG00000168060 | NAALADL1        | 11 | 65044818  | 65058549  | protein_coding | 32,20 | 0 |
| ENSG00000147689 | FAM83A          | 8  | 123178960 | 123210079 | protein_coding | 32,20 | 0 |
| ENSG00000158481 | CD1C            | 1  | 158289786 | 158293630 | protein_coding | 32,20 | 0 |
| ENSG00000163482 | STK36           | 2  | 218672026 | 218702716 | protein_coding | 32,19 | 0 |
| ENSG00000132005 | RFX1            | 19 | 13961538  | 14007039  | protein_coding | 32,16 | 0 |
| ENSG00000184545 | DUSP8           | 11 | 1554044   | 1571920   | protein_coding | 32,16 | 0 |
| ENSG00000198736 | MSRB1           | 16 | 1938210   | 1943326   | protein_coding | 32,14 | 0 |
| ENSG00000178149 | DALRD3          | 3  | 49015488  | 49022293  | protein_coding | 32,11 | 0 |
| ENSG00000085465 | OVGP1           | 1  | 111414314 | 111427777 | protein_coding | 32,10 | 0 |
| ENSG00000279457 | ENSG00000279457 | 1  | 184923    | 200322    | protein_coding | 32,10 | 0 |
| ENSG00000164924 | YWHAZ           | 8  | 100916525 | 100953388 | protein_coding | 32,07 | 0 |
| ENSG00000076924 | XAB2            | 19 | 7619525   | 7629565   | protein_coding | 32,06 | 0 |
| ENSG00000197157 | SND1            | 7  | 127652180 | 128092609 | protein_coding | 32,02 | 0 |
| ENSG00000156711 | MAPK13          | 6  | 36127809  | 36144524  | protein_coding | 32,02 | 0 |
| ENSG00000111424 | VDR             | 12 | 47841537  | 47943048  | protein_coding | 32,00 | 0 |
| ENSG00000230453 | ANKRD18B        | 9  | 33524394  | 33573009  | protein_coding | 32,00 | 0 |
| ENSG00000070193 | FGF10           | 5  | 44303544  | 44389706  | protein_coding | 32,00 | 0 |
| ENSG00000179630 | LACC1           | 13 | 43879284  | 43893932  | protein_coding | 31,99 | 0 |
| ENSG00000074370 | ATP2A3          | 17 | 3923870   | 3964464   | protein_coding | 31,98 | 0 |
| ENSG00000071054 | MAP4K4          | 2  | 101696850 | 101894689 | protein_coding | 31,97 | 0 |
| ENSG00000136273 | HUS1            | 7  | 47695730  | 47979581  | protein_coding | 31,96 | 0 |
| ENSG00000131398 | KCNC3           | 19 | 50311937  | 50333515  | protein_coding | 31,95 | 0 |
| ENSG00000155304 | HSPA13          | 21 | 14371115  | 14383484  | protein_coding | 31,92 | 0 |
| ENSG00000103067 | ESRP2           | 16 | 68229111  | 68238102  | protein_coding | 31,91 | 0 |
| ENSG00000065559 | MAP2K4          | 17 | 12020824  | 12143830  | protein_coding | 31,91 | 0 |
| ENSG00000129204 | USP6            | 17 | 5116438   | 5175034   | protein_coding | 31,89 | 0 |
| ENSG00000158828 | PINK1           | 1  | 20633455  | 20651511  | protein_coding | 31,84 | 0 |
| ENSG00000206560 | ANKRD28         | 3  | 15667236  | 15859771  | protein_coding | 31,84 | 0 |
| ENSG00000159307 | SCUBE1          | 22 | 43197283  | 43343388  | protein_coding | 31,83 | 0 |
| ENSG00000258472 | ENSG00000258472 | 17 | 28455752  | 28614197  | protein_coding | 31,80 | 0 |
| ENSG00000166762 | CATSPER2        | 15 | 43628503  | 43668118  | protein_coding | 31,80 | 0 |
| ENSG00000125991 | ERGIC3          | 20 | 35542021  | 35557634  | protein_coding | 31,78 | 0 |
| ENSG00000160991 | ORAI2           | 7  | 102433106 | 102456821 | protein_coding | 31,77 | 0 |
| ENSG00000006715 | VPS41           | 7  | 38722963  | 38932394  | protein_coding | 31,72 | 0 |
| ENSG00000177189 | RPS6KA3         | X  | 20149911  | 20267100  | protein_coding | 31,66 | 0 |
| ENSG00000129450 | SIGLEC9         | 19 | 51124908  | 51136651  | protein_coding | 31,60 | 0 |
| ENSG00000274750 | HIST1H3E        | 6  | 26224199  | 26227473  | protein_coding | 31,60 | 0 |
| ENSG00000144040 | SFXN5           | 2  | 72942036  | 73075619  | protein_coding | 31,60 | 0 |
| ENSG00000108829 | LRRC59          | 17 | 50375059  | 50397553  | protein_coding | 31,59 | 0 |
| ENSG00000100216 | TOMM22          | 22 | 38681948  | 38685421  | protein_coding | 31,56 | 0 |
| ENSG00000096717 | SIRT1           | 10 | 67884669  | 67918390  | protein_coding | 31,54 | 0 |
| ENSG00000156973 | PDE6D           | 2  | 231732425 | 231786272 | protein_coding | 31,54 | 0 |
| ENSG00000253731 | PCDHGA6         | 5  | 141373914 | 141512979 | protein_coding | 31,50 | 0 |
| ENSG00000259956 | RBM15B          | 3  | 51391268  | 51397908  | protein_coding | 31,48 | 0 |
| ENSG00000173905 | GOLIM4          | 3  | 168008677 | 168095975 | protein_coding | 31,43 | 0 |
| ENSG00000173875 | ZNF791          | 19 | 12610918  | 12633840  | protein_coding | 31,40 | 0 |
| ENSG00000212127 | TAS2R14         | 12 | 10937406  | 11171573  | protein_coding | 31,40 | 0 |
| ENSG00000108039 | XPNPEP1         | 10 | 109864766 | 109923553 | protein_coding | 31,39 | 0 |

|                 |            |    |           |           |                |       |   |
|-----------------|------------|----|-----------|-----------|----------------|-------|---|
| ENSG00000132589 | FLOT2      | 17 | 28879335  | 28897679  | protein_coding | 31,35 | 0 |
| ENSG00000068120 | COASY      | 17 | 42561467  | 42566277  | protein_coding | 31,34 | 0 |
| ENSG00000110422 | HIPK3      | 11 | 33256672  | 33357023  | protein_coding | 31,30 | 0 |
| ENSG00000145708 | CRHBP      | 5  | 76952713  | 76981158  | protein_coding | 31,24 | 0 |
| ENSG00000135097 | MSI1       | 12 | 120341330 | 120369180 | protein_coding | 31,21 | 0 |
| ENSG00000148719 | DNAJB12    | 10 | 72332830  | 72355230  | protein_coding | 31,21 | 0 |
| ENSG00000139154 | AEBP2      | 12 | 19404045  | 19720801  | protein_coding | 31,20 | 0 |
| ENSG00000176293 | ZNF135     | 19 | 58059239  | 58086310  | protein_coding | 31,18 | 0 |
| ENSG00000155903 | RASA2      | 3  | 141487047 | 141615342 | protein_coding | 31,18 | 0 |
| ENSG00000186222 | BLOC1S4    | 4  | 6716055   | 6717671   | protein_coding | 31,18 | 0 |
| ENSG00000123728 | RAP2C      | X  | 132203024 | 132219480 | protein_coding | 31,17 | 0 |
| ENSG00000182944 | EWSR1      | 22 | 29268009  | 29300525  | protein_coding | 31,16 | 0 |
| ENSG00000164535 | DAGLB      | 7  | 6409126   | 6484190   | protein_coding | 31,08 | 0 |
| ENSG00000119574 | ZBTB45     | 19 | 58513530  | 58538911  | protein_coding | 31,08 | 0 |
| ENSG00000175662 | TOM1L2     | 17 | 17843511  | 17972422  | protein_coding | 31,06 | 0 |
| ENSG00000262814 | MRPL12     | 17 | 81703357  | 81707526  | protein_coding | 31,04 | 0 |
| ENSG00000099341 | PSMD8      | 19 | 38374536  | 38383824  | protein_coding | 31,02 | 0 |
| ENSG00000188026 | RILPL1     | 12 | 123470054 | 123533718 | protein_coding | 31,02 | 0 |
| ENSG00000134109 | EDEM1      | 3  | 5187646   | 5219957   | protein_coding | 31,00 | 0 |
| ENSG00000148672 | GLUD1      | 10 | 87050486  | 87094866  | protein_coding | 30,98 | 0 |
| ENSG00000170579 | DLGAP1     | 18 | 3496032   | 4455335   | protein_coding | 30,97 | 0 |
| ENSG00000128045 | RASL11B    | 4  | 52862290  | 52866835  | protein_coding | 30,96 | 0 |
| ENSG00000171700 | RGS19      | 20 | 64073181  | 64079988  | protein_coding | 30,96 | 0 |
| ENSG00000170647 | TMEM133    | 11 | 100991989 | 100993941 | protein_coding | 30,95 | 0 |
| ENSG00000088812 | ATRN       | 20 | 3471040   | 3651122   | protein_coding | 30,93 | 0 |
| ENSG00000163958 | ZDHHC19    | 3  | 196197449 | 196211437 | protein_coding | 30,92 | 0 |
| ENSG00000162551 | ALPL       | 1  | 21509372  | 21578412  | protein_coding | 30,90 | 0 |
| ENSG00000175591 | P2RY2      | 11 | 73218298  | 73236352  | protein_coding | 30,90 | 0 |
| ENSG00000120324 | PCDHB10    | 5  | 141182560 | 141195642 | protein_coding | 30,90 | 0 |
| ENSG00000135776 | ABCB10     | 1  | 229516582 | 229558695 | protein_coding | 30,88 | 0 |
| ENSG00000150756 | FAM173B    | 5  | 10226330  | 10249897  | protein_coding | 30,88 | 0 |
| ENSG00000123144 | C19orf43   | 19 | 12730640  | 12734775  | protein_coding | 30,87 | 0 |
| ENSG00000151881 | C5orf28    | 5  | 43444252  | 43483893  | protein_coding | 30,86 | 0 |
| ENSG00000163155 | LYSMD1     | 1  | 151159748 | 151165948 | protein_coding | 30,83 | 0 |
| ENSG00000167680 | SEMA6B     | 19 | 4542593   | 4559808   | protein_coding | 30,80 | 0 |
| ENSG00000182196 | ARL6IP4    | 12 | 122980060 | 122982913 | protein_coding | 30,80 | 0 |
| ENSG00000110025 | SNX15      | 11 | 65027408  | 65040572  | protein_coding | 30,80 | 0 |
| ENSG00000101294 | HM13       | 20 | 31514428  | 31577923  | protein_coding | 30,79 | 0 |
| ENSG00000171160 | MORN4      | 10 | 97614553  | 97633500  | protein_coding | 30,78 | 0 |
| ENSG00000100412 | ACO2       | 22 | 41469125  | 41528989  | protein_coding | 30,75 | 0 |
| ENSG00000142233 | NTN5       | 19 | 48661407  | 48673081  | protein_coding | 30,70 | 0 |
| ENSG00000197498 | RPF2       | 6  | 110982015 | 111028263 | protein_coding | 30,68 | 0 |
| ENSG00000161835 | GRASP      | 12 | 52006940  | 52015889  | protein_coding | 30,66 | 0 |
| ENSG00000171724 | VAT1L      | 16 | 77788530  | 77980107  | protein_coding | 30,64 | 0 |
| ENSG00000140795 | MYLK3      | 16 | 46703369  | 46790407  | protein_coding | 30,60 | 0 |
| ENSG00000160870 | CYP3A7     | 7  | 99705037  | 99735196  | protein_coding | 30,60 | 0 |
| ENSG00000044524 | EPHA3      | 3  | 89107524  | 89482134  | protein_coding | 30,60 | 0 |
| ENSG00000143318 | CASQ1      | 1  | 160190556 | 160201886 | protein_coding | 30,60 | 0 |
| ENSG00000123415 | SMUG1      | 12 | 54121277  | 54189008  | protein_coding | 30,57 | 0 |
| ENSG00000179950 | PUF60      | 8  | 143816344 | 143829859 | protein_coding | 30,56 | 0 |
| ENSG00000156162 | DPY19L4    | 8  | 94719703  | 94793836  | protein_coding | 30,55 | 0 |
| ENSG00000169962 | TAS1R3     | 1  | 1331314   | 1335306   | protein_coding | 30,54 | 0 |
| ENSG00000177951 | BET1L      | 11 | 167784    | 207428    | protein_coding | 30,52 | 0 |
| ENSG00000205177 | C11orf91   | 11 | 33698261  | 33700801  | protein_coding | 30,50 | 0 |
| ENSG00000181638 | ZFP41      | 8  | 143246821 | 143262705 | protein_coding | 30,50 | 0 |
| ENSG00000174740 | PABPC5     | X  | 91434595  | 91438584  | protein_coding | 30,50 | 0 |
| ENSG00000162599 | NFIA       | 1  | 60865259  | 61462793  | protein_coding | 30,48 | 0 |
| ENSG00000180574 | ENSG000001 | 12 | 10505602  | 10523135  | protein_coding | 30,47 | 0 |

|                 |            |    |           |           |                |       |   |
|-----------------|------------|----|-----------|-----------|----------------|-------|---|
| ENSG00000166068 | SPRED1     | 15 | 38252326  | 38357249  | protein_coding | 30,46 | 0 |
| ENSG00000140464 | PML        | 15 | 73994673  | 74047812  | protein_coding | 30,41 | 0 |
| ENSG00000170881 | RNF139     | 8  | 124474738 | 124487914 | protein_coding | 30,41 | 0 |
| ENSG00000076201 | PTPN23     | 3  | 47381011  | 47413441  | protein_coding | 30,40 | 0 |
| ENSG00000269313 | MAGIX      | X  | 49162564  | 49168483  | protein_coding | 30,40 | 0 |
| ENSG00000177666 | PNPLA2     | 11 | 818902    | 825573    | protein_coding | 30,39 | 0 |
| ENSG00000100836 | PABPN1     | 14 | 23321289  | 23326185  | protein_coding | 30,30 | 0 |
| ENSG00000175564 | UCP3       | 11 | 74000281  | 74009435  | protein_coding | 30,30 | 0 |
| ENSG00000137161 | CNPY3      | 6  | 42929192  | 42939287  | protein_coding | 30,28 | 0 |
| ENSG00000115073 | ACTR1B     | 2  | 97655963  | 97664107  | protein_coding | 30,28 | 0 |
| ENSG00000161654 | LSM12      | 17 | 44034635  | 44067619  | protein_coding | 30,26 | 0 |
| ENSG00000025434 | NR1H3      | 11 | 47248300  | 47269032  | protein_coding | 30,26 | 0 |
| ENSG00000118985 | ELL2       | 5  | 95885098  | 95962071  | protein_coding | 30,23 | 0 |
| ENSG00000105438 | KDELRL1    | 19 | 48382570  | 48391553  | protein_coding | 30,22 | 0 |
| ENSG00000144852 | NR1I2      | 3  | 119780484 | 119818485 | protein_coding | 30,20 | 0 |
| ENSG00000099260 | PALMD      | 1  | 99645943  | 99694541  | protein_coding | 30,18 | 0 |
| ENSG00000165527 | ARF6       | 14 | 49893092  | 49897054  | protein_coding | 30,16 | 0 |
| ENSG00000136271 | DDX56      | 7  | 44565417  | 44575051  | protein_coding | 30,15 | 0 |
| ENSG00000148468 | FAM171A1   | 10 | 15211643  | 15371062  | protein_coding | 30,14 | 0 |
| ENSG00000116679 | IVNS1ABP   | 1  | 185296388 | 185317329 | protein_coding | 30,14 | 0 |
| ENSG00000104897 | SF3A2      | 19 | 2236504   | 2248679   | protein_coding | 30,11 | 0 |
| ENSG00000175832 | ETV4       | 17 | 43527844  | 43579620  | protein_coding | 30,10 | 0 |
| ENSG00000072195 | SPEG       | 2  | 219434846 | 219498287 | protein_coding | 30,10 | 0 |
| ENSG00000197915 | HRNR       | 1  | 152212082 | 152224193 | protein_coding | 30,10 | 0 |
| ENSG00000126746 | ZNF384     | 12 | 6666477   | 6689572   | protein_coding | 30,08 | 0 |
| ENSG00000115844 | DLX2       | 2  | 172099439 | 172102900 | protein_coding | 30,08 | 0 |
| ENSG00000101353 | MROH8      | 20 | 37101226  | 37179588  | protein_coding | 30,00 | 0 |
| ENSG00000197858 | GPAA1      | 8  | 144082590 | 144086216 | protein_coding | 30,00 | 0 |
| ENSG00000163913 | IFT122     | 3  | 129440036 | 129520507 | protein_coding | 29,99 | 0 |
| ENSG00000100105 | PATZ1      | 22 | 31325804  | 31346232  | protein_coding | 29,99 | 0 |
| ENSG00000110799 | VWF        | 12 | 5948874   | 6124770   | protein_coding | 29,96 | 0 |
| ENSG00000139233 | LLPH       | 12 | 66116555  | 66130768  | protein_coding | 29,95 | 0 |
| ENSG00000162878 | PKDCC      | 2  | 42048020  | 42058528  | protein_coding | 29,93 | 0 |
| ENSG00000101210 | EEF1A2     | 20 | 63488013  | 63499315  | protein_coding | 29,92 | 0 |
| ENSG00000023839 | ABCC2      | 10 | 99782732  | 99852192  | protein_coding | 29,92 | 0 |
| ENSG00000253729 | PRKDC      | 8  | 47773108  | 47960183  | protein_coding | 29,91 | 0 |
| ENSG00000100311 | PDGFB      | 22 | 39223359  | 39244751  | protein_coding | 29,90 | 0 |
| ENSG00000092850 | TEKT2      | 1  | 36084075  | 36088275  | protein_coding | 29,90 | 0 |
| ENSG00000157349 | DDX19B     | 16 | 70289663  | 70335283  | protein_coding | 29,88 | 0 |
| ENSG00000141349 | G6PC3      | 17 | 44070735  | 44076344  | protein_coding | 29,87 | 0 |
| ENSG00000198853 | RUSC2      | 9  | 35490127  | 35561898  | protein_coding | 29,84 | 0 |
| ENSG00000111726 | CMAS       | 12 | 22046174  | 22065674  | protein_coding | 29,83 | 0 |
| ENSG00000166321 | NUDT13     | 10 | 73110375  | 73131828  | protein_coding | 29,82 | 0 |
| ENSG00000163681 | SLMAP      | 3  | 57755450  | 57929168  | protein_coding | 29,82 | 0 |
| ENSG00000164136 | IL15       | 4  | 141636599 | 141733987 | protein_coding | 29,80 | 0 |
| ENSG00000096070 | BRPF3      | 6  | 36196744  | 36232790  | protein_coding | 29,79 | 0 |
| ENSG00000112245 | PTP4A1     | 6  | 63521761  | 63583587  | protein_coding | 29,79 | 0 |
| ENSG00000225190 | PLEKHM1    | 17 | 45435900  | 45490749  | protein_coding | 29,75 | 0 |
| ENSG00000186815 | TPCN1      | 12 | 113221050 | 113298585 | protein_coding | 29,75 | 0 |
| ENSG00000168994 | PXDC1      | 6  | 3722614   | 3752026   | protein_coding | 29,73 | 0 |
| ENSG00000143643 | TTC13      | 1  | 230906243 | 230978875 | protein_coding | 29,71 | 0 |
| ENSG00000204131 | NHSL2      | X  | 71910818  | 72161750  | protein_coding | 29,70 | 0 |
| ENSG00000074219 | TEAD2      | 19 | 49340595  | 49362457  | protein_coding | 29,69 | 0 |
| ENSG00000178562 | CD28       | 2  | 203706475 | 203738912 | protein_coding | 29,67 | 0 |
| ENSG00000174917 | C19orf70   | 19 | 5678421   | 5680896   | protein_coding | 29,64 | 0 |
| ENSG00000145020 | AMT        | 3  | 49416778  | 49422753  | protein_coding | 29,60 | 0 |
| ENSG00000258311 | ENSG000002 | 12 | 55716036  | 55724703  | protein_coding | 29,60 | 0 |
| ENSG00000184343 | SRPK3      | X  | 153776412 | 153785732 | protein_coding | 29,60 | 0 |

|                 |           |    |           |           |                |       |   |
|-----------------|-----------|----|-----------|-----------|----------------|-------|---|
| ENSG00000170892 | TSEN34    | 19 | 54189938  | 54194536  | protein_coding | 29,60 | 0 |
| ENSG00000176396 | EID2      | 19 | 39538250  | 39540230  | protein_coding | 29,58 | 0 |
| ENSG00000072818 | ACAP1     | 17 | 7336529   | 7351478   | protein_coding | 29,53 | 0 |
| ENSG00000170855 | TRIAP1    | 12 | 120443961 | 120446412 | protein_coding | 29,53 | 0 |
| ENSG00000053438 | NNAT      | 20 | 37521215  | 37523693  | protein_coding | 29,50 | 0 |
| ENSG00000164953 | TMEM67    | 8  | 93754844  | 93819234  | protein_coding | 29,50 | 0 |
| ENSG00000129596 | CDO1      | 5  | 115804733 | 115816954 | protein_coding | 29,50 | 0 |
| ENSG00000183684 | ALYREF    | 17 | 81887844  | 81891586  | protein_coding | 29,48 | 0 |
| ENSG00000120889 | TNFRSF10B | 8  | 23020133  | 23069179  | protein_coding | 29,47 | 0 |
| ENSG00000106367 | AP1S1     | 7  | 101154397 | 101161596 | protein_coding | 29,47 | 0 |
| ENSG00000108950 | FAM20A    | 17 | 68535113  | 68601389  | protein_coding | 29,46 | 0 |
| ENSG00000159761 | C16orf86  | 16 | 67666816  | 67668758  | protein_coding | 29,45 | 0 |
| ENSG00000149485 | FADS1     | 11 | 61799625  | 61829318  | protein_coding | 29,44 | 0 |
| ENSG00000105058 | FAM32A    | 19 | 16185380  | 16192046  | protein_coding | 29,42 | 0 |
| ENSG00000101417 | PXMP4     | 20 | 33702754  | 33720319  | protein_coding | 29,42 | 0 |
| ENSG00000132570 | PCBD2     | 5  | 134904906 | 135007959 | protein_coding | 29,41 | 0 |
| ENSG00000198046 | ZNF667    | 19 | 56439325  | 56478065  | protein_coding | 29,36 | 0 |
| ENSG00000181588 | MEX3D     | 19 | 1554669   | 1568058   | protein_coding | 29,33 | 0 |
| ENSG00000006704 | GTF2IRD1  | 7  | 74453790  | 74602604  | protein_coding | 29,30 | 0 |
| ENSG00000204922 | UQCC3     | 11 | 62670273  | 62673687  | protein_coding | 29,28 | 0 |
| ENSG00000104728 | ARHGEF10  | 8  | 1823976   | 1958641   | protein_coding | 29,27 | 0 |
| ENSG00000136280 | CCM2      | 7  | 44999475  | 45076469  | protein_coding | 29,24 | 0 |
| ENSG00000169439 | SDC2      | 8  | 96493351  | 96611780  | protein_coding | 29,22 | 0 |
| ENSG00000156968 | MPV17L    | 16 | 15395754  | 15413268  | protein_coding | 29,20 | 0 |
| ENSG00000173391 | OLR1      | 12 | 10158301  | 10172138  | protein_coding | 29,20 | 0 |
| ENSG00000173020 | ADRBK1    | 11 | 67266410  | 67286556  | protein_coding | 29,19 | 0 |
| ENSG00000140280 | LYSMD2    | 15 | 51723011  | 51751585  | protein_coding | 29,19 | 0 |
| ENSG00000206418 | RAB12     | 18 | 8609445   | 8639381   | protein_coding | 29,18 | 0 |
| ENSG00000204052 | LRRC73    | 6  | 43506969  | 43510686  | protein_coding | 29,18 | 0 |
| ENSG00000132394 | EEFSEC    | 3  | 128153454 | 128408646 | protein_coding | 29,16 | 0 |
| ENSG00000142327 | RNPEPL1   | 2  | 240565804 | 240581372 | protein_coding | 29,14 | 0 |
| ENSG00000258366 | RTEL1     | 20 | 63657810  | 63696253  | protein_coding | 29,13 | 0 |
| ENSG00000175470 | PPP2R2D   | 10 | 131900644 | 131959834 | protein_coding | 29,12 | 0 |
| ENSG00000186517 | ARHGAP30  | 1  | 161046946 | 161069970 | protein_coding | 29,12 | 0 |
| ENSG00000184489 | PTP4A3    | 8  | 141391993 | 141432454 | protein_coding | 29,08 | 0 |
| ENSG00000110917 | MLEC      | 12 | 120686869 | 120701864 | protein_coding | 29,07 | 0 |
| ENSG00000163156 | SCNM1     | 1  | 151156664 | 151170297 | protein_coding | 29,07 | 0 |
| ENSG00000160447 | PKN3      | 9  | 128702523 | 128720918 | protein_coding | 29,04 | 0 |
| ENSG00000104549 | SQLE      | 8  | 124998497 | 125022283 | protein_coding | 29,03 | 0 |
| ENSG00000134905 | CARS2     | 13 | 110641412 | 110713603 | protein_coding | 29,00 | 0 |
| ENSG00000180644 | PRF1      | 10 | 70597348  | 70602775  | protein_coding | 29,00 | 0 |
| ENSG00000102385 | DRP2      | X  | 101219769 | 101264497 | protein_coding | 29,00 | 0 |
| ENSG00000103502 | CDIPT     | 16 | 29858357  | 29863736  | protein_coding | 29,00 | 0 |
| ENSG00000137171 | KLC4      | 6  | 43040777  | 43075099  | protein_coding | 28,97 | 0 |
| ENSG00000004478 | FKBP4     | 12 | 2794953   | 2805423   | protein_coding | 28,96 | 0 |
| ENSG00000142166 | IFNAR1    | 21 | 33324477  | 33359862  | protein_coding | 28,95 | 0 |
| ENSG00000100399 | CHADL     | 22 | 41229510  | 41240934  | protein_coding | 28,94 | 0 |
| ENSG00000117408 | IPO13     | 1  | 43946939  | 43968022  | protein_coding | 28,92 | 0 |
| ENSG00000198756 | COLGALT2  | 1  | 183929854 | 184037729 | protein_coding | 28,90 | 0 |
| ENSG00000172890 | NADSYN1   | 11 | 71453109  | 71524107  | protein_coding | 28,89 | 0 |
| ENSG00000122783 | C7orf49   | 7  | 135092363 | 135170795 | protein_coding | 28,85 | 0 |
| ENSG00000188690 | UROS      | 10 | 125784980 | 125823248 | protein_coding | 28,85 | 0 |
| ENSG00000067064 | IDI1      | 10 | 1039908   | 1049170   | protein_coding | 28,83 | 0 |
| ENSG00000070214 | SLC44A1   | 9  | 105244622 | 105439171 | protein_coding | 28,81 | 0 |
| ENSG00000263465 | SRSF8     | 11 | 95067197  | 95071224  | protein_coding | 28,81 | 0 |
| ENSG00000108094 | CUL2      | 10 | 35008551  | 35090642  | protein_coding | 28,75 | 0 |
| ENSG00000100997 | ABHD12    | 20 | 25294743  | 25390983  | protein_coding | 28,75 | 0 |
| ENSG00000185164 | NOMO2     | 16 | 18417325  | 18562211  | protein_coding | 28,75 | 0 |

|                 |            |    |           |           |                |       |   |
|-----------------|------------|----|-----------|-----------|----------------|-------|---|
| ENSG00000134851 | TMEM165    | 4  | 55395957  | 55453397  | protein_coding | 28,74 | 0 |
| ENSG00000160087 | UBE2J2     | 1  | 1253909   | 1273885   | protein_coding | 28,73 | 0 |
| ENSG00000140105 | WARS       | 14 | 100333788 | 100376805 | protein_coding | 28,71 | 0 |
| ENSG00000138231 | DBR1       | 3  | 138161012 | 138174949 | protein_coding | 28,70 | 0 |
| ENSG00000108479 | GALK1      | 17 | 75751594  | 75765711  | protein_coding | 28,67 | 0 |
| ENSG00000250486 | FAM218A    | 4  | 164956948 | 164959122 | protein_coding | 28,67 | 0 |
| ENSG00000107263 | RAPGEF1    | 9  | 131576770 | 131740074 | protein_coding | 28,66 | 0 |
| ENSG00000100483 | VCPKMT     | 14 | 50108632  | 50116600  | protein_coding | 28,63 | 0 |
| ENSG00000147168 | IL2RG      | X  | 71107404  | 71112108  | protein_coding | 28,60 | 0 |
| ENSG00000114315 | HES1       | 3  | 194136145 | 194138732 | protein_coding | 28,57 | 0 |
| ENSG00000162735 | PEX19      | 1  | 160276812 | 160286348 | protein_coding | 28,52 | 0 |
| ENSG00000139910 | NOVA1      | 14 | 26443093  | 26597754  | protein_coding | 28,50 | 0 |
| ENSG00000150051 | MKX        | 10 | 27672875  | 27746060  | protein_coding | 28,50 | 0 |
| ENSG00000185823 | NPAP1      | 15 | 24675868  | 24683393  | protein_coding | 28,47 | 0 |
| ENSG00000113739 | STC2       | 5  | 173314713 | 173329503 | protein_coding | 28,46 | 0 |
| ENSG00000141574 | SECTM1     | 17 | 82321024  | 82334074  | protein_coding | 28,40 | 0 |
| ENSG00000156463 | SH3RF2     | 5  | 145936579 | 146081791 | protein_coding | 28,40 | 0 |
| ENSG00000164120 | HPGD       | 4  | 174490177 | 174523154 | protein_coding | 28,40 | 0 |
| ENSG00000157064 | NMNAT2     | 1  | 183248237 | 183418602 | protein_coding | 28,40 | 0 |
| ENSG00000099800 | TIMM13     | 19 | 2425624   | 2427894   | protein_coding | 28,39 | 0 |
| ENSG00000111331 | OAS3       | 12 | 112938352 | 112973249 | protein_coding | 28,39 | 0 |
| ENSG00000141002 | TCF25      | 16 | 89873586  | 89911384  | protein_coding | 28,39 | 0 |
| ENSG00000145681 | HAPLN1     | 5  | 83637805  | 83721613  | protein_coding | 28,38 | 0 |
| ENSG00000170485 | NPAS2      | 2  | 100820152 | 100996829 | protein_coding | 28,34 | 0 |
| ENSG00000117984 | CTSD       | 11 | 1752752   | 1763992   | protein_coding | 28,33 | 0 |
| ENSG00000257335 | MGAM       | 7  | 141907813 | 142106747 | protein_coding | 28,33 | 0 |
| ENSG00000121775 | TMEM39B    | 1  | 32072031  | 32102866  | protein_coding | 28,33 | 0 |
| ENSG00000184900 | SUMO3      | 21 | 44805617  | 44818779  | protein_coding | 28,31 | 0 |
| ENSG00000204677 | FAM153C    | 5  | 178006405 | 178055559 | protein_coding | 28,30 | 0 |
| ENSG00000105700 | KXD1       | 19 | 18557762  | 18569387  | protein_coding | 28,29 | 0 |
| ENSG00000118200 | CAMSAP2    | 1  | 200739558 | 200860704 | protein_coding | 28,28 | 0 |
| ENSG00000110934 | BIN2       | 12 | 51281038  | 51324668  | protein_coding | 28,28 | 0 |
| ENSG00000117862 | TXNDC12    | 1  | 52020131  | 52056171  | protein_coding | 28,28 | 0 |
| ENSG00000176542 | USF3       | 3  | 113648385 | 113696646 | protein_coding | 28,26 | 0 |
| ENSG00000145740 | SLC30A5    | 5  | 69093646  | 69131069  | protein_coding | 28,26 | 0 |
| ENSG00000110107 | PRPF19     | 11 | 60890730  | 60906588  | protein_coding | 28,26 | 0 |
| ENSG00000154813 | DPH3       | 3  | 16257978  | 16264972  | protein_coding | 28,25 | 0 |
| ENSG00000132613 | MTSS1L     | 16 | 70661204  | 70686066  | protein_coding | 28,23 | 0 |
| ENSG00000104219 | ZDHHC2     | 8  | 17156029  | 17224799  | protein_coding | 28,20 | 0 |
| ENSG00000161551 | ZNF577     | 19 | 51855802  | 51890950  | protein_coding | 28,20 | 0 |
| ENSG00000092295 | TGM1       | 14 | 24249114  | 24264432  | protein_coding | 28,20 | 0 |
| ENSG00000187091 | PLCD1      | 3  | 38007496  | 38029762  | protein_coding | 28,20 | 0 |
| ENSG00000153885 | KCTD15     | 19 | 33795933  | 33815763  | protein_coding | 28,19 | 0 |
| ENSG00000111639 | MRPL51     | 12 | 6491886   | 6493841   | protein_coding | 28,19 | 0 |
| ENSG00000056558 | TRAF1      | 9  | 120902393 | 120929173 | protein_coding | 28,16 | 0 |
| ENSG00000163170 | BOLA3      | 2  | 74135398  | 74147994  | protein_coding | 28,15 | 0 |
| ENSG00000149571 | KIRREL3    | 11 | 126423359 | 127003460 | protein_coding | 28,14 | 0 |
| ENSG00000075073 | TACR2      | 10 | 69403903  | 69416867  | protein_coding | 28,10 | 0 |
| ENSG00000176410 | DNAJC30    | 7  | 73680969  | 73683453  | protein_coding | 28,09 | 0 |
| ENSG00000118960 | HS1BP3     | 2  | 20560448  | 20651089  | protein_coding | 28,07 | 0 |
| ENSG00000117009 | KMO        | 1  | 241532134 | 241595642 | protein_coding | 28,06 | 0 |
| ENSG00000148841 | ITPRIP     | 10 | 104309698 | 104338404 | protein_coding | 28,06 | 0 |
| ENSG00000183386 | FHL3       | 1  | 37996770  | 38005606  | protein_coding | 28,05 | 0 |
| ENSG00000163820 | FYCO1      | 3  | 45917899  | 45995824  | protein_coding | 28,01 | 0 |
| ENSG00000031698 | SARS       | 1  | 109213918 | 109238169 | protein_coding | 28,01 | 0 |
| ENSG00000235194 | PPP1R3E    | 14 | 23295643  | 23302848  | protein_coding | 28,00 | 0 |
| ENSG00000177359 | ENSG000001 | 12 | 31111652  | 31206154  | protein_coding | 28,00 | 0 |
| ENSG00000132612 | VPS4A      | 16 | 69311356  | 69326939  | protein_coding | 27,99 | 0 |



|                 |            |    |           |           |                |       |   |
|-----------------|------------|----|-----------|-----------|----------------|-------|---|
| ENSG00000178700 | DHFRL1     | 3  | 94047836  | 94063389  | protein_coding | 27,99 | 0 |
| ENSG00000168763 | CNNM3      | 2  | 96816245  | 96833911  | protein_coding | 27,99 | 0 |
| ENSG00000243716 | NPIPB5     | 16 | 22479121  | 22536521  | protein_coding | 27,96 | 0 |
| ENSG00000010322 | NISCH      | 3  | 52455118  | 52493071  | protein_coding | 27,95 | 0 |
| ENSG00000115825 | PRKD3      | 2  | 37250502  | 37324808  | protein_coding | 27,93 | 0 |
| ENSG00000103365 | GGA2       | 16 | 23463542  | 23521995  | protein_coding | 27,92 | 0 |
| ENSG00000164631 | ZNF12      | 7  | 6688433   | 6706923   | protein_coding | 27,92 | 0 |
| ENSG00000206203 | TSSK2      | 22 | 19130808  | 19132623  | protein_coding | 27,90 | 0 |
| ENSG00000167799 | NUDT8      | 11 | 67627938  | 67629930  | protein_coding | 27,90 | 0 |
| ENSG00000164591 | MYOZ3      | 5  | 150660874 | 150679365 | protein_coding | 27,90 | 0 |
| ENSG00000241489 | ENSG000002 | X  | 149482543 | 149533935 | protein_coding | 27,90 | 0 |
| ENSG00000139117 | CPNE8      | 12 | 38646822  | 38907430  | protein_coding | 27,89 | 0 |
| ENSG00000164066 | INTU       | 4  | 127623271 | 127726737 | protein_coding | 27,88 | 0 |
| ENSG00000131043 | AAR2       | 20 | 36236459  | 36270918  | protein_coding | 27,82 | 0 |
| ENSG00000023191 | RNH1       | 11 | 494512    | 507300    | protein_coding | 27,82 | 0 |
| ENSG00000110104 | CCDC86     | 11 | 60842071  | 60851081  | protein_coding | 27,81 | 0 |
| ENSG00000150593 | PDCD4      | 10 | 110871795 | 110900006 | protein_coding | 27,80 | 0 |
| ENSG00000163945 | UVSSA      | 4  | 1347266   | 1388049   | protein_coding | 27,79 | 0 |
| ENSG00000122729 | ACO1       | 9  | 32384603  | 32454769  | protein_coding | 27,79 | 0 |
| ENSG00000196693 | ZNF33B     | 10 | 42574185  | 42638568  | protein_coding | 27,79 | 0 |
| ENSG00000179632 | MAF1       | 8  | 144104499 | 144107611 | protein_coding | 27,78 | 0 |
| ENSG00000215790 | SLC35E2    | 1  | 1724838   | 1745992   | protein_coding | 27,75 | 0 |
| ENSG00000105953 | OGDH       | 7  | 44606572  | 44709066  | protein_coding | 27,74 | 0 |
| ENSG00000144857 | BOC        | 3  | 113211003 | 113287459 | protein_coding | 27,73 | 0 |
| ENSG00000135637 | CCDC142    | 2  | 74471986  | 74483408  | protein_coding | 27,72 | 0 |
| ENSG00000270629 | NBPF14     | 1  | 148531385 | 148679751 | protein_coding | 27,71 | 0 |
| ENSG00000158864 | NDUFS2     | 1  | 161197104 | 161214395 | protein_coding | 27,70 | 0 |
| ENSG00000105656 | ELL        | 19 | 18442663  | 18522127  | protein_coding | 27,67 | 0 |
| ENSG00000103227 | LMF1       | 16 | 853634    | 981318    | protein_coding | 27,66 | 0 |
| ENSG00000129355 | CDKN2D     | 19 | 10566462  | 10569059  | protein_coding | 27,65 | 0 |
| ENSG00000164176 | EDIL3      | 5  | 83940554  | 84384793  | protein_coding | 27,65 | 0 |
| ENSG00000051009 | FAM160A2   | 11 | 6211335   | 6234711   | protein_coding | 27,64 | 0 |
| ENSG00000224982 | TMEM233    | 12 | 119593459 | 119643066 | protein_coding | 27,64 | 0 |
| ENSG00000128309 | MPST       | 22 | 37019635  | 37029822  | protein_coding | 27,61 | 0 |
| ENSG00000215277 | RNF212B    | 14 | 23185316  | 23273477  | protein_coding | 27,60 | 0 |
| ENSG00000135437 | RDH5       | 12 | 55720367  | 55724705  | protein_coding | 27,60 | 0 |
| ENSG00000137441 | FGFBP2     | 4  | 15960243  | 15969309  | protein_coding | 27,60 | 0 |
| ENSG00000006194 | ZNF263     | 16 | 3263800   | 3301401   | protein_coding | 27,58 | 0 |
| ENSG00000170634 | ACYP2      | 2  | 53970838  | 54305300  | protein_coding | 27,56 | 0 |
| ENSG00000119699 | TGFB3      | 14 | 75958099  | 75982991  | protein_coding | 27,53 | 0 |
| ENSG00000170500 | LONRF2     | 2  | 100273291 | 100322733 | protein_coding | 27,53 | 0 |
| ENSG00000120820 | GLT8D2     | 12 | 103988984 | 104064183 | protein_coding | 27,50 | 0 |
| ENSG00000100038 | TOP3B      | 22 | 21957025  | 21982816  | protein_coding | 27,48 | 0 |
| ENSG00000145743 | FBXL17     | 5  | 107859035 | 108382098 | protein_coding | 27,44 | 0 |
| ENSG00000205221 | VIT        | 2  | 36696690  | 36814792  | protein_coding | 27,42 | 0 |
| ENSG00000117425 | PTCH2      | 1  | 44819844  | 44843063  | protein_coding | 27,41 | 0 |
| ENSG00000100353 | EIF3D      | 22 | 36510850  | 36529436  | protein_coding | 27,40 | 0 |
| ENSG00000124251 | TP53TG5    | 20 | 45372563  | 45407889  | protein_coding | 27,40 | 0 |
| ENSG00000203667 | COX20      | 1  | 244835322 | 244845057 | protein_coding | 27,39 | 0 |
| ENSG00000143889 | HNRNPLL    | 2  | 38561978  | 38603586  | protein_coding | 27,31 | 0 |
| ENSG00000164850 | GPER1      | 7  | 1082208   | 1093815   | protein_coding | 27,30 | 0 |
| ENSG00000122692 | SMU1       | 9  | 33041764  | 33076659  | protein_coding | 27,29 | 0 |
| ENSG00000145685 | LHFPL2     | 5  | 78485215  | 78770021  | protein_coding | 27,25 | 0 |
| ENSG00000104974 | LILRA1     | 19 | 54573879  | 54602090  | protein_coding | 27,20 | 0 |
| ENSG00000270885 | RASL10B    | 17 | 35731649  | 35743521  | protein_coding | 27,20 | 0 |
| ENSG00000170075 | GPR37L1    | 1  | 202122858 | 202133592 | protein_coding | 27,20 | 0 |
| ENSG00000135766 | EGLN1      | 1  | 231363751 | 231425044 | protein_coding | 27,19 | 0 |
| ENSG00000136104 | RNASEH2B   | 13 | 50909678  | 50973745  | protein_coding | 27,19 | 0 |

|                 |          |    |           |           |                |       |   |
|-----------------|----------|----|-----------|-----------|----------------|-------|---|
| ENSG00000105875 | WDR91    | 7  | 135183839 | 135211534 | protein_coding | 27,19 | 0 |
| ENSG00000170175 | CHRN1    | 17 | 7445061   | 7457707   | protein_coding | 27,17 | 0 |
| ENSG00000144031 | ANKRD53  | 2  | 70978380  | 70985499  | protein_coding | 27,14 | 0 |
| ENSG00000182771 | GRID1    | 10 | 85599555  | 86366493  | protein_coding | 27,10 | 0 |
| ENSG00000215045 | GRID2IP  | 7  | 6497462   | 6551436   | protein_coding | 27,10 | 0 |
| ENSG00000037280 | FLT4     | 5  | 180601506 | 180649624 | protein_coding | 27,10 | 0 |
| ENSG00000169435 | RASSF6   | 4  | 73571550  | 73620631  | protein_coding | 27,10 | 0 |
| ENSG00000185436 | IFNLR1   | 1  | 24154157  | 24187959  | protein_coding | 27,10 | 0 |
| ENSG00000116017 | ARID3A   | 19 | 925781    | 975934    | protein_coding | 27,07 | 0 |
| ENSG00000167216 | KATNAL2  | 18 | 46917492  | 47102243  | protein_coding | 27,07 | 0 |
| ENSG00000122482 | ZNF644   | 1  | 90915298  | 91022272  | protein_coding | 27,03 | 0 |
| ENSG00000164342 | TLR3     | 4  | 186069152 | 186088069 | protein_coding | 27,02 | 0 |
| ENSG00000102230 | PCYT1B   | X  | 24558087  | 24672677  | protein_coding | 27,01 | 0 |
| ENSG00000151773 | CCDC122  | 13 | 43823909  | 43879727  | protein_coding | 27,00 | 0 |
| ENSG00000232112 | TMA7     | 3  | 48440257  | 48444208  | protein_coding | 26,96 | 0 |
| ENSG00000184857 | TMEM186  | 16 | 8780384   | 8797648   | protein_coding | 26,95 | 0 |
| ENSG00000139826 | ABHD13   | 13 | 108218379 | 108234255 | protein_coding | 26,94 | 0 |
| ENSG00000101474 | APMAP    | 20 | 24962925  | 24992979  | protein_coding | 26,92 | 0 |
| ENSG00000188818 | ZDHHC11  | 5  | 795606    | 850986    | protein_coding | 26,92 | 0 |
| ENSG00000143373 | ZNF687   | 1  | 151281618 | 151292180 | protein_coding | 26,90 | 0 |
| ENSG00000126749 | EMG1     | 12 | 6970893   | 6979941   | protein_coding | 26,86 | 0 |
| ENSG00000197265 | GTF2E2   | 8  | 30578318  | 30658251  | protein_coding | 26,84 | 0 |
| ENSG00000134072 | CAMK1    | 3  | 9757342   | 9769992   | protein_coding | 26,81 | 0 |
| ENSG00000072121 | ZFYVE26  | 14 | 67727374  | 67816590  | protein_coding | 26,79 | 0 |
| ENSG00000221829 | FANCG    | 9  | 35073835  | 35080016  | protein_coding | 26,78 | 0 |
| ENSG00000243279 | PRAF2    | X  | 49071156  | 49074071  | protein_coding | 26,77 | 0 |
| ENSG00000141905 | NFIC     | 19 | 3359563   | 3469217   | protein_coding | 26,76 | 0 |
| ENSG00000162714 | ZNF496   | 1  | 247297412 | 247331846 | protein_coding | 26,75 | 0 |
| ENSG00000152291 | TGOLN2   | 2  | 85318020  | 85328425  | protein_coding | 26,74 | 0 |
| ENSG00000169972 | PUSL1    | 1  | 1308567   | 1311677   | protein_coding | 26,73 | 0 |
| ENSG00000100934 | SEC23A   | 14 | 39031919  | 39109646  | protein_coding | 26,71 | 0 |
| ENSG00000171126 | KCNG3    | 2  | 42442017  | 42494097  | protein_coding | 26,71 | 0 |
| ENSG00000187566 | NHLRC1   | 6  | 18121419  | 18122606  | protein_coding | 26,70 | 0 |
| ENSG00000105402 | NAPA     | 19 | 47487637  | 47515240  | protein_coding | 26,68 | 0 |
| ENSG00000091409 | ITGA6    | 2  | 172427354 | 172506282 | protein_coding | 26,65 | 0 |
| ENSG00000276547 | PCDHGB5  | 5  | 141397987 | 141512979 | protein_coding | 26,63 | 0 |
| ENSG00000111897 | SERINC1  | 6  | 122443354 | 122471822 | protein_coding | 26,61 | 0 |
| ENSG00000134242 | PTPN22   | 1  | 113813811 | 113871759 | protein_coding | 26,60 | 0 |
| ENSG00000186787 | SPIN2B   | X  | 57118551  | 57121547  | protein_coding | 26,60 | 0 |
| ENSG00000168653 | NDUFS5   | 1  | 39026318  | 39034636  | protein_coding | 26,56 | 0 |
| ENSG00000081791 | KIAA0141 | 5  | 141923808 | 141942047 | protein_coding | 26,55 | 0 |
| ENSG00000105926 | MPP6     | 7  | 24573268  | 24694193  | protein_coding | 26,54 | 0 |
| ENSG00000152465 | NMT2     | 10 | 15102584  | 15168693  | protein_coding | 26,53 | 0 |
| ENSG00000067057 | PFKP     | 10 | 3066333   | 3137712   | protein_coding | 26,52 | 0 |
| ENSG00000221869 | CEBPD    | 8  | 47736909  | 47739086  | protein_coding | 26,52 | 0 |
| ENSG00000050555 | LAMC3    | 9  | 131009082 | 131094473 | protein_coding | 26,52 | 0 |
| ENSG00000059915 | PSD      | 10 | 102402617 | 102421539 | protein_coding | 26,51 | 0 |
| ENSG00000135341 | MAP3K7   | 6  | 90513573  | 90587045  | protein_coding | 26,51 | 0 |
| ENSG00000204516 | MICB     | 6  | 31494881  | 31511124  | protein_coding | 26,50 | 0 |
| ENSG00000163660 | CCNL1    | 3  | 157146508 | 157160760 | protein_coding | 26,42 | 0 |
| ENSG00000104967 | NOVA2    | 19 | 45933734  | 45973546  | protein_coding | 26,40 | 0 |
| ENSG00000129749 | CHRNA10  | 11 | 3665587   | 3671384   | protein_coding | 26,40 | 0 |
| ENSG00000161888 | SPC24    | 19 | 11131520  | 11155808  | protein_coding | 26,39 | 0 |
| ENSG00000196843 | ARID5A   | 2  | 96536743  | 96552638  | protein_coding | 26,38 | 0 |
| ENSG00000134717 | BTF3L4   | 1  | 52056125  | 52090716  | protein_coding | 26,37 | 0 |
| ENSG00000167123 | CERCAM   | 9  | 128411751 | 128437351 | protein_coding | 26,36 | 0 |
| ENSG00000165732 | DDX21    | 10 | 68956128  | 68985073  | protein_coding | 26,35 | 0 |
| ENSG00000125510 | OPRL1    | 20 | 64080173  | 64100643  | protein_coding | 26,33 | 0 |

|                 |                 |    |           |           |                |       |   |
|-----------------|-----------------|----|-----------|-----------|----------------|-------|---|
| ENSG0000060558  | GNA15           | 19 | 3136193   | 3163769   | protein_coding | 26,30 | 0 |
| ENSG0000091513  | TF              | 3  | 133745956 | 133779006 | protein_coding | 26,30 | 0 |
| ENSG00000183354 | KIAA2026        | 9  | 5881596   | 6007901   | protein_coding | 26,24 | 0 |
| ENSG00000234719 | ENSG00000234719 | 16 | 11927373  | 11976643  | protein_coding | 26,23 | 0 |
| ENSG00000157551 | KCNJ15          | 21 | 38157034  | 38307357  | protein_coding | 26,20 | 0 |
| ENSG0000090659  | CD209           | 19 | 7739994   | 7747564   | protein_coding | 26,20 | 0 |
| ENSG00000105671 | DDX49           | 19 | 18919675  | 18928633  | protein_coding | 26,20 | 0 |
| ENSG00000103512 | NOMO1           | 16 | 14833681  | 14896160  | protein_coding | 26,18 | 0 |
| ENSG00000203668 | CHML            | 1  | 241628853 | 241635930 | protein_coding | 26,17 | 0 |
| ENSG00000241258 | CRCP            | 7  | 66114604  | 66154568  | protein_coding | 26,16 | 0 |
| ENSG00000104915 | STX10           | 19 | 13144058  | 13150383  | protein_coding | 26,16 | 0 |
| ENSG00000105642 | KCNN1           | 19 | 17951293  | 18000080  | protein_coding | 26,16 | 0 |
| ENSG00000159131 | GART            | 21 | 33503931  | 33543491  | protein_coding | 26,15 | 0 |
| ENSG0000099783  | HNRNPM          | 19 | 8444767   | 8489114   | protein_coding | 26,15 | 0 |
| ENSG00000243335 | KCTD7           | 7  | 66628881  | 66811187  | protein_coding | 26,14 | 0 |
| ENSG00000274897 | PANO1           | 11 | 797511    | 799190    | protein_coding | 26,10 | 0 |
| ENSG00000162267 | ITIH3           | 3  | 52794768  | 52809009  | protein_coding | 26,10 | 0 |
| ENSG0000010165  | METTL13         | 1  | 171781664 | 171814023 | protein_coding | 26,10 | 0 |
| ENSG0000008323  | PLEKHG6         | 12 | 6310436   | 6328506   | protein_coding | 26,09 | 0 |
| ENSG00000122068 | FYTTD1          | 3  | 197737179 | 197787596 | protein_coding | 26,06 | 0 |
| ENSG00000167604 | NFKBID          | 19 | 35887653  | 35902303  | protein_coding | 26,05 | 0 |
| ENSG00000197343 | ZNF655          | 7  | 99558406  | 99576453  | protein_coding | 26,05 | 0 |
| ENSG00000184984 | CHRM5           | 15 | 33968720  | 34067457  | protein_coding | 26,00 | 0 |
| ENSG00000257594 | GALNT4          | 12 | 89519408  | 89524806  | protein_coding | 26,00 | 0 |
| ENSG00000152558 | TMEM123         | 11 | 102396332 | 102470384 | protein_coding | 26,00 | 0 |
| ENSG00000185670 | ZBTB3           | 11 | 62748319  | 62754188  | protein_coding | 25,95 | 0 |
| ENSG00000144891 | AGTR1           | 3  | 148697784 | 148743008 | protein_coding | 25,92 | 0 |
| ENSG00000180525 | PRR26           | 10 | 649948    | 669581    | protein_coding | 25,90 | 0 |
| ENSG00000113504 | SLC12A7         | 5  | 1050376   | 1112035   | protein_coding | 25,89 | 0 |
| ENSG00000103423 | DNAJA3          | 16 | 4425805   | 4456775   | protein_coding | 25,89 | 0 |
| ENSG0000084444  | FAM234B         | 12 | 13044284  | 13142521  | protein_coding | 25,86 | 0 |
| ENSG00000187650 | VMAC            | 19 | 5904858   | 5910853   | protein_coding | 25,86 | 0 |
| ENSG00000214309 | MBLAC1          | 7  | 100126694 | 100128498 | protein_coding | 25,86 | 0 |
| ENSG00000185803 | SLC52A2         | 8  | 144354135 | 144361272 | protein_coding | 25,85 | 0 |
| ENSG00000162664 | ZNF326          | 1  | 89995112  | 90035531  | protein_coding | 25,83 | 0 |
| ENSG00000185236 | RAB11B          | 19 | 8389981   | 8404434   | protein_coding | 25,81 | 0 |
| ENSG00000081853 | PCDHGA2         | 5  | 141338760 | 141512979 | protein_coding | 25,80 | 0 |
| ENSG00000179528 | LBX2            | 2  | 74497517  | 74503316  | protein_coding | 25,80 | 0 |
| ENSG00000198758 | EPS8L3          | 1  | 109750080 | 109764027 | protein_coding | 25,80 | 0 |
| ENSG00000145782 | ATG12           | 5  | 115828200 | 115841858 | protein_coding | 25,77 | 0 |
| ENSG00000102302 | FGD1            | X  | 54445454  | 54496166  | protein_coding | 25,77 | 0 |
| ENSG00000269713 | NBPF9           | 1  | 149054027 | 149103561 | protein_coding | 25,76 | 0 |
| ENSG00000117597 | DIEXF           | 1  | 209828007 | 209857565 | protein_coding | 25,76 | 0 |
| ENSG00000187446 | CHP1            | 15 | 41230839  | 41281890  | protein_coding | 25,74 | 0 |
| ENSG00000177045 | SIX5            | 19 | 45764785  | 45769226  | protein_coding | 25,73 | 0 |
| ENSG00000114021 | NIT2            | 3  | 100334701 | 100361635 | protein_coding | 25,72 | 0 |
| ENSG00000134759 | ELP2            | 18 | 36129444  | 36180556  | protein_coding | 25,72 | 0 |
| ENSG00000108010 | GLRX3           | 10 | 130136399 | 130184521 | protein_coding | 25,72 | 0 |
| ENSG00000161929 | SCIMP           | 17 | 5208961   | 5234860   | protein_coding | 25,71 | 0 |
| ENSG00000100030 | MAPK1           | 22 | 21754500  | 21867680  | protein_coding | 25,68 | 0 |
| ENSG00000171766 | GATM            | 15 | 45361124  | 45402327  | protein_coding | 25,67 | 0 |
| ENSG00000169018 | FEM1B           | 15 | 68277803  | 68295865  | protein_coding | 25,67 | 0 |
| ENSG00000228253 | MT-ATP8         | X  | 8366      | 8572      | protein_coding | 25,67 | 0 |
| ENSG00000053702 | NRIP2           | 12 | 2825348   | 2835544   | protein_coding | 25,64 | 0 |
| ENSG00000166780 | C16orf45        | 16 | 15434295  | 15625028  | protein_coding | 25,63 | 0 |
| ENSG00000170345 | FOS             | 14 | 75278774  | 75282230  | protein_coding | 25,61 | 0 |
| ENSG00000181029 | TRAPPC5         | 19 | 7680843   | 7687703   | protein_coding | 25,60 | 0 |
| ENSG00000067113 | PLPP1           | 5  | 55424854  | 55535050  | protein_coding | 25,58 | 0 |

|                 |            |    |           |           |                |       |   |
|-----------------|------------|----|-----------|-----------|----------------|-------|---|
| ENSG00000145014 | TMEM44     | 3  | 194587673 | 194633689 | protein_coding | 25,55 | 0 |
| ENSG00000203710 | CR1        | 1  | 207496147 | 207640647 | protein_coding | 25,53 | 0 |
| ENSG00000250571 | GLI4       | 8  | 143267433 | 143276931 | protein_coding | 25,51 | 0 |
| ENSG00000271303 | SRXN1      | 20 | 646615    | 653370    | protein_coding | 25,50 | 0 |
| ENSG00000168329 | CX3CR1     | 3  | 39263494  | 39281735  | protein_coding | 25,50 | 0 |
| ENSG00000102317 | RBM3       | X  | 48574449  | 48579066  | protein_coding | 25,47 | 0 |
| ENSG00000130985 | UBA1       | X  | 47190861  | 47215128  | protein_coding | 25,47 | 0 |
| ENSG00000141699 | FAM134C    | 17 | 42579513  | 42610623  | protein_coding | 25,46 | 0 |
| ENSG00000146966 | DENND2A    | 7  | 140518420 | 140673993 | protein_coding | 25,45 | 0 |
| ENSG00000130723 | PRRC2B     | 9  | 131394093 | 131500197 | protein_coding | 25,40 | 0 |
| ENSG00000239998 | LILRA2     | 19 | 54572920  | 54590287  | protein_coding | 25,40 | 0 |
| ENSG00000136457 | CHAD       | 17 | 50464496  | 50468966  | protein_coding | 25,40 | 0 |
| ENSG00000049192 | ADAMTS6    | 5  | 65148736  | 65481920  | protein_coding | 25,40 | 0 |
| ENSG00000048405 | ZNF800     | 7  | 127346790 | 127431924 | protein_coding | 25,38 | 0 |
| ENSG00000100983 | GSS        | 20 | 34928430  | 34955817  | protein_coding | 25,36 | 0 |
| ENSG00000198589 | LRBA       | 4  | 150264531 | 151015727 | protein_coding | 25,36 | 0 |
| ENSG00000134744 | ZCCHC11    | 1  | 52408282  | 52553487  | protein_coding | 25,36 | 0 |
| ENSG00000104825 | NFKBIB     | 19 | 38899700  | 38908893  | protein_coding | 25,34 | 0 |
| ENSG00000134153 | EMC7       | 15 | 34084017  | 34101948  | protein_coding | 25,34 | 0 |
| ENSG00000187678 | SPRY4      | 5  | 142310427 | 142326455 | protein_coding | 25,32 | 0 |
| ENSG00000164031 | DNAJB14    | 4  | 99896248  | 99946726  | protein_coding | 25,30 | 0 |
| ENSG00000166803 | KIAA0101   | 15 | 64364311  | 64387687  | protein_coding | 25,30 | 0 |
| ENSG00000181929 | PRKAG1     | 12 | 49002274  | 49019197  | protein_coding | 25,29 | 0 |
| ENSG00000261150 | EPPK1      | 8  | 143857324 | 143878464 | protein_coding | 25,29 | 0 |
| ENSG00000105819 | PMPCB      | 7  | 103297422 | 103329511 | protein_coding | 25,28 | 0 |
| ENSG00000203705 | TATDN3     | 1  | 212791828 | 212816626 | protein_coding | 25,26 | 0 |
| ENSG00000022267 | FHL1       | X  | 136146702 | 136211359 | protein_coding | 25,26 | 0 |
| ENSG00000179886 | TIGD5      | 8  | 143597835 | 143603224 | protein_coding | 25,24 | 0 |
| ENSG00000101546 | RBFA       | 18 | 80034358  | 80046397  | protein_coding | 25,24 | 0 |
| ENSG00000236287 | ZBED5      | 11 | 10812074  | 10858796  | protein_coding | 25,22 | 0 |
| ENSG00000185722 | ANKFY1     | 17 | 4163907   | 4263977   | protein_coding | 25,20 | 0 |
| ENSG00000184602 | SNN        | 16 | 11668414  | 11679159  | protein_coding | 25,17 | 0 |
| ENSG00000248098 | BCKDHA     | 19 | 41397460  | 41431345  | protein_coding | 25,16 | 0 |
| ENSG00000106086 | PLEKHA8    | 7  | 30027404  | 30130483  | protein_coding | 25,14 | 0 |
| ENSG00000204220 | PFDN6      | 6  | 33289302  | 33298401  | protein_coding | 25,14 | 0 |
| ENSG00000197386 | HTT        | 4  | 3074681   | 3243959   | protein_coding | 25,13 | 0 |
| ENSG00000167468 | GPX4       | 19 | 1103926   | 1106791   | protein_coding | 25,12 | 0 |
| ENSG00000144130 | NT5DC4     | 2  | 112721486 | 112742879 | protein_coding | 25,11 | 0 |
| ENSG00000105607 | GCDH       | 19 | 12891026  | 12914207  | protein_coding | 25,11 | 0 |
| ENSG00000197448 | GSTK1      | 7  | 143244093 | 143270854 | protein_coding | 25,08 | 0 |
| ENSG00000143486 | EIF2D      | 1  | 206571292 | 206612463 | protein_coding | 25,04 | 0 |
| ENSG00000150401 | DCUN1D2    | 13 | 113455819 | 113490952 | protein_coding | 25,03 | 0 |
| ENSG00000102547 | CAB39L     | 13 | 49308650  | 49444126  | protein_coding | 25,01 | 0 |
| ENSG00000196209 | SIRPB2     | 20 | 1470741   | 1491587   | protein_coding | 25,00 | 0 |
| ENSG00000126266 | FFAR1      | 19 | 35351552  | 35353862  | protein_coding | 25,00 | 0 |
| ENSG00000276085 | CCL3L3     | 17 | 36194869  | 36196758  | protein_coding | 25,00 | 0 |
| ENSG00000259529 | ENSG000002 | 14 | 24151218  | 24167402  | protein_coding | 25,00 | 0 |
| ENSG00000160213 | CSTB       | 21 | 43772512  | 43776445  | protein_coding | 24,98 | 0 |
| ENSG00000184787 | UBE2G2     | 21 | 44768580  | 44802019  | protein_coding | 24,98 | 0 |
| ENSG00000121653 | MAPK8IP1   | 11 | 45885651  | 45906465  | protein_coding | 24,94 | 0 |
| ENSG00000188997 | KCTD21     | 11 | 78171249  | 78188822  | protein_coding | 24,94 | 0 |
| ENSG00000137710 | RDX        | 11 | 110174880 | 110296722 | protein_coding | 24,93 | 0 |
| ENSG00000103196 | CRISPLD2   | 16 | 84819984  | 84920768  | protein_coding | 24,91 | 0 |
| ENSG00000173825 | TIGD3      | 11 | 65354767  | 65357613  | protein_coding | 24,90 | 0 |
| ENSG00000228300 | C19orf24   | 19 | 1275438   | 1279249   | protein_coding | 24,89 | 0 |
| ENSG00000166845 | C18orf54   | 18 | 54357917  | 54385218  | protein_coding | 24,88 | 0 |
| ENSG00000161681 | SHANK1     | 19 | 50661827  | 50719450  | protein_coding | 24,85 | 0 |
| ENSG00000242259 | C22orf39   | 22 | 19351368  | 19448232  | protein_coding | 24,82 | 0 |

|                 |          |    |           |           |                |       |   |
|-----------------|----------|----|-----------|-----------|----------------|-------|---|
| ENSG00000168490 | PHYHIP   | 8  | 22219704  | 22232341  | protein_coding | 24,80 | 0 |
| ENSG00000167131 | CCDC103  | 17 | 44899142  | 44905390  | protein_coding | 24,79 | 0 |
| ENSG00000105792 | CFAP69   | 7  | 90245174  | 90311063  | protein_coding | 24,78 | 0 |
| ENSG00000018236 | CNTN1    | 12 | 40692442  | 41072418  | protein_coding | 24,78 | 0 |
| ENSG00000053254 | FOXN3    | 14 | 89124871  | 89619149  | protein_coding | 24,77 | 0 |
| ENSG00000127603 | MACF1    | 1  | 39081316  | 39487177  | protein_coding | 24,72 | 0 |
| ENSG00000162769 | FLVCR1   | 1  | 212858255 | 212899363 | protein_coding | 24,71 | 0 |
| ENSG00000019144 | PHLDB1   | 11 | 118606440 | 118658038 | protein_coding | 24,71 | 0 |
| ENSG00000173715 | C11orf80 | 11 | 66744451  | 66843328  | protein_coding | 24,70 | 0 |
| ENSG00000189298 | ZKSCAN3  | 6  | 28349914  | 28369177  | protein_coding | 24,70 | 0 |
| ENSG00000250506 | CDK3     | 17 | 76000906  | 76005999  | protein_coding | 24,70 | 0 |
| ENSG00000197409 | HIST1H3D | 6  | 26196840  | 26197250  | protein_coding | 24,70 | 0 |
| ENSG00000198342 | ZNF442   | 19 | 12345949  | 12365905  | protein_coding | 24,69 | 0 |
| ENSG00000103335 | PIEZO1   | 16 | 88715343  | 88785211  | protein_coding | 24,67 | 0 |
| ENSG00000013392 | RWDD2A   | 6  | 83193379  | 83198932  | protein_coding | 24,67 | 0 |
| ENSG00000168924 | LETM1    | 4  | 1811479   | 1856247   | protein_coding | 24,66 | 0 |
| ENSG00000213760 | ATP6V1G2 | 6  | 31544462  | 31548427  | protein_coding | 24,65 | 0 |
| ENSG00000184481 | FOXO4    | X  | 71096197  | 71103535  | protein_coding | 24,63 | 0 |
| ENSG00000188542 | DUSP28   | 2  | 240560054 | 240564014 | protein_coding | 24,62 | 0 |
| ENSG00000151778 | SERP2    | 13 | 44373665  | 44397714  | protein_coding | 24,61 | 0 |
| ENSG00000177830 | CHID1    | 11 | 867860    | 915058    | protein_coding | 24,60 | 0 |
| ENSG00000100429 | HDAC10   | 22 | 50245183  | 50251405  | protein_coding | 24,60 | 0 |
| ENSG00000154760 | SLFN13   | 17 | 35435096  | 35448837  | protein_coding | 24,60 | 0 |
| ENSG00000182575 | NXPH3    | 17 | 49575858  | 49583827  | protein_coding | 24,60 | 0 |
| ENSG00000275302 | CCL4     | 17 | 36103590  | 36105621  | protein_coding | 24,60 | 0 |
| ENSG00000139540 | SLC39A5  | 12 | 56230049  | 56237846  | protein_coding | 24,60 | 0 |
| ENSG00000011009 | LYPLA2   | 1  | 23790970  | 23795539  | protein_coding | 24,59 | 0 |
| ENSG00000091536 | MYO15A   | 17 | 18108706  | 18179802  | protein_coding | 24,59 | 0 |
| ENSG00000221978 | CCNL2    | 1  | 1385711   | 1399328   | protein_coding | 24,58 | 0 |
| ENSG00000186818 | LILRB4   | 19 | 54643889  | 54670359  | protein_coding | 24,58 | 0 |
| ENSG00000112852 | PCDHB2   | 5  | 141094578 | 141098703 | protein_coding | 24,58 | 0 |
| ENSG00000109929 | SC5D     | 11 | 121292453 | 121308694 | protein_coding | 24,57 | 0 |
| ENSG00000145022 | TCTA     | 3  | 49412206  | 49416475  | protein_coding | 24,56 | 0 |
| ENSG00000136237 | RAPGEF5  | 7  | 22118238  | 22357144  | protein_coding | 24,55 | 0 |
| ENSG00000130734 | ATG4D    | 19 | 10543895  | 10553418  | protein_coding | 24,53 | 0 |
| ENSG00000171150 | SOCS5    | 2  | 46698952  | 46763129  | protein_coding | 24,52 | 0 |
| ENSG00000152082 | MZT2B    | 2  | 130181737 | 130190729 | protein_coding | 24,52 | 0 |
| ENSG00000119684 | MLH3     | 14 | 75013764  | 75051532  | protein_coding | 24,51 | 0 |
| ENSG00000112183 | RBM24    | 6  | 17281346  | 17293875  | protein_coding | 24,50 | 0 |
| ENSG00000253953 | PCDHGB4  | 5  | 141387698 | 141512979 | protein_coding | 24,50 | 0 |
| ENSG00000197217 | ENTPD4   | 8  | 23385783  | 23457695  | protein_coding | 24,48 | 0 |
| ENSG00000185009 | AP3M1    | 10 | 74120255  | 74151063  | protein_coding | 24,48 | 0 |
| ENSG00000131236 | CAP1     | 1  | 40040233  | 40072649  | protein_coding | 24,48 | 0 |
| ENSG00000160214 | RRP1     | 21 | 43789513  | 43805293  | protein_coding | 24,46 | 0 |
| ENSG00000133687 | TMTC1    | 12 | 29500840  | 29784759  | protein_coding | 24,44 | 0 |
| ENSG00000177300 | CLDN22   | 4  | 183318194 | 183320774 | protein_coding | 24,44 | 0 |
| ENSG00000126107 | HECTD3   | 1  | 45002540  | 45011329  | protein_coding | 24,42 | 0 |
| ENSG00000183426 | NPIPA1   | 16 | 14750813  | 14952060  | protein_coding | 24,40 | 0 |
| ENSG00000036828 | CASR     | 3  | 122183683 | 122286503 | protein_coding | 24,40 | 0 |
| ENSG00000205090 | TMEM240  | 1  | 1535174   | 1540453   | protein_coding | 24,40 | 0 |
| ENSG00000181404 | WASH1    | 9  | 14521     | 29739     | protein_coding | 24,38 | 0 |
| ENSG00000012660 | ELOVL5   | 6  | 53267398  | 53349179  | protein_coding | 24,38 | 0 |
| ENSG00000174456 | C12orf76 | 12 | 110027028 | 110073686 | protein_coding | 24,37 | 0 |
| ENSG00000007923 | DNAJC11  | 1  | 6634168   | 6701924   | protein_coding | 24,35 | 0 |
| ENSG00000167720 | SRR      | 17 | 2303383   | 2325260   | protein_coding | 24,35 | 0 |
| ENSG00000143537 | ADAM15   | 1  | 155050566 | 155062775 | protein_coding | 24,34 | 0 |
| ENSG00000079246 | XRCC5    | 2  | 216107464 | 216206303 | protein_coding | 24,34 | 0 |
| ENSG00000141295 | SCRN2    | 17 | 47837692  | 47841333  | protein_coding | 24,33 | 0 |

|                 |            |    |           |           |                |       |   |
|-----------------|------------|----|-----------|-----------|----------------|-------|---|
| ENSG00000204590 | GNL1       | 6  | 30541377  | 30557174  | protein_coding | 24,32 | 0 |
| ENSG00000162889 | MAPKAPK2   | 1  | 206684944 | 206734283 | protein_coding | 24,32 | 0 |
| ENSG00000198369 | SPRED2     | 2  | 65310851  | 65432637  | protein_coding | 24,31 | 0 |
| ENSG00000137814 | HAUS2      | 15 | 42548810  | 42569994  | protein_coding | 24,31 | 0 |
| ENSG00000110871 | COQ5       | 12 | 120503274 | 120534434 | protein_coding | 24,31 | 0 |
| ENSG00000227877 | MRLN       | 10 | 59736692  | 59756041  | protein_coding | 24,30 | 0 |
| ENSG00000261934 | PCDHGA9    | 5  | 141402932 | 141512979 | protein_coding | 24,30 | 0 |
| ENSG00000171385 | KCND3      | 1  | 111770662 | 111989155 | protein_coding | 24,30 | 0 |
| ENSG00000167930 | FAM234A    | 16 | 234546    | 268971    | protein_coding | 24,29 | 0 |
| ENSG00000114982 | KANSL3     | 2  | 96593170  | 96642787  | protein_coding | 24,26 | 0 |
| ENSG00000147789 | ZNF7       | 8  | 144827464 | 144847509 | protein_coding | 24,26 | 0 |
| ENSG00000096093 | EFHC1      | 6  | 52420308  | 52495785  | protein_coding | 24,26 | 0 |
| ENSG00000179044 | EXOC3L1    | 16 | 67184366  | 67190204  | protein_coding | 24,24 | 0 |
| ENSG00000133703 | KRAS       | 12 | 25204789  | 25250936  | protein_coding | 24,23 | 0 |
| ENSG00000198843 | ENSG000001 | 3  | 150602875 | 150630445 | protein_coding | 24,23 | 0 |
| ENSG00000100314 | CABP7      | 22 | 29720084  | 29731839  | protein_coding | 24,23 | 0 |
| ENSG00000143157 | POGK       | 1  | 166839447 | 166856344 | protein_coding | 24,22 | 0 |
| ENSG00000213780 | GTF2H4     | 6  | 30908184  | 30914106  | protein_coding | 24,20 | 0 |
| ENSG00000162882 | HAAO       | 2  | 42767089  | 42792593  | protein_coding | 24,20 | 0 |
| ENSG00000215704 | CELA2B     | 1  | 15465909  | 15491400  | protein_coding | 24,20 | 0 |
| ENSG00000172339 | ALG14      | 1  | 94974407  | 95072945  | protein_coding | 24,20 | 0 |
| ENSG00000114554 | PLXNA1     | 3  | 126988594 | 127037392 | protein_coding | 24,19 | 0 |
| ENSG00000179348 | GATA2      | 3  | 128479427 | 128493185 | protein_coding | 24,18 | 0 |
| ENSG00000150712 | MTMR12     | 5  | 32226994  | 32313009  | protein_coding | 24,17 | 0 |
| ENSG00000105726 | ATP13A1    | 19 | 19645198  | 19663693  | protein_coding | 24,17 | 0 |
| ENSG00000197948 | FCHSD1     | 5  | 141639302 | 141651419 | protein_coding | 24,16 | 0 |
| ENSG00000138738 | PRDM5      | 4  | 120684919 | 120922870 | protein_coding | 24,12 | 0 |
| ENSG00000171357 | LURAP1     | 1  | 46203334  | 46221261  | protein_coding | 24,11 | 0 |
| ENSG00000011485 | PPP5C      | 19 | 46346994  | 46392981  | protein_coding | 24,10 | 0 |
| ENSG00000121410 | A1BG       | 19 | 58345178  | 58353499  | protein_coding | 24,10 | 0 |
| ENSG00000171903 | CYP4F11    | 19 | 15912367  | 15934867  | protein_coding | 24,10 | 0 |
| ENSG00000187987 | ZSCAN23    | 6  | 28431930  | 28443502  | protein_coding | 24,10 | 0 |
| ENSG00000165868 | HSPA12A    | 10 | 116671192 | 116742574 | protein_coding | 24,09 | 0 |
| ENSG00000187796 | CARD9      | 9  | 136361903 | 136373681 | protein_coding | 24,08 | 0 |
| ENSG00000180938 | ZNF572     | 8  | 124973298 | 124979389 | protein_coding | 24,08 | 0 |
| ENSG00000092964 | DPYSL2     | 8  | 26514275  | 26658178  | protein_coding | 24,08 | 0 |
| ENSG00000177200 | CHD9       | 16 | 53055033  | 53329150  | protein_coding | 24,07 | 0 |
| ENSG00000136813 | KIAA0368   | 9  | 111360692 | 111484745 | protein_coding | 24,05 | 0 |
| ENSG00000065427 | KARS       | 16 | 75627474  | 75648643  | protein_coding | 24,04 | 0 |
| ENSG00000181045 | SLC26A11   | 17 | 80219699  | 80253500  | protein_coding | 24,02 | 0 |
| ENSG00000076344 | RGS11      | 16 | 268301    | 275980    | protein_coding | 24,00 | 0 |
| ENSG00000185585 | OLFML2A    | 9  | 124777158 | 124814885 | protein_coding | 24,00 | 0 |
| ENSG00000080224 | EPHA6      | 3  | 96814581  | 97752460  | protein_coding | 24,00 | 0 |
| ENSG00000187583 | PLEKHN1    | 1  | 966497    | 975865    | protein_coding | 24,00 | 0 |
| ENSG00000011304 | PTBP1      | 19 | 797075    | 812327    | protein_coding | 24,00 | 0 |
| ENSG00000080031 | PTPRH      | 19 | 55181248  | 55209506  | protein_coding | 23,98 | 0 |
| ENSG00000117868 | ESYT2      | 7  | 158730995 | 158830253 | protein_coding | 23,97 | 0 |
| ENSG00000141449 | GREB1L     | 18 | 21242242  | 21525417  | protein_coding | 23,96 | 0 |
| ENSG00000122694 | GLIPR2     | 9  | 36136536  | 36163913  | protein_coding | 23,96 | 0 |
| ENSG00000119812 | FAM98A     | 2  | 33583658  | 33599382  | protein_coding | 23,94 | 0 |
| ENSG00000178401 | DNAJC22    | 12 | 49346917  | 49357546  | protein_coding | 23,92 | 0 |
| ENSG00000186496 | ZNF396     | 18 | 35366697  | 35377337  | protein_coding | 23,91 | 0 |
| ENSG00000168454 | TXNDC2     | 18 | 9885726   | 9889275   | protein_coding | 23,90 | 0 |
| ENSG00000187800 | PEAR1      | 1  | 156893698 | 156916434 | protein_coding | 23,90 | 0 |
| ENSG00000122376 | FAM35A     | 10 | 87094161  | 87191468  | protein_coding | 23,89 | 0 |
| ENSG00000264364 | DYNLL2     | 17 | 58083415  | 58095536  | protein_coding | 23,87 | 0 |
| ENSG00000204427 | ABHD16A    | 6  | 31686949  | 31703444  | protein_coding | 23,86 | 0 |
| ENSG00000169718 | DUS1L      | 17 | 82057506  | 82065887  | protein_coding | 23,83 | 0 |

|                 |          |    |           |           |                |       |   |
|-----------------|----------|----|-----------|-----------|----------------|-------|---|
| ENSG00000102158 | MAGT1    | X  | 77826364  | 77895593  | protein_coding | 23,81 | 0 |
| ENSG00000100304 | TLL12    | 22 | 43166622  | 43187133  | protein_coding | 23,81 | 0 |
| ENSG00000145632 | PLK2     | 5  | 58453982  | 58460260  | protein_coding | 23,80 | 0 |
| ENSG00000188257 | PLA2G2A  | 1  | 19975431  | 19980416  | protein_coding | 23,80 | 0 |
| ENSG00000269113 | TRABD2B  | 1  | 47760528  | 47996895  | protein_coding | 23,80 | 0 |
| ENSG00000170027 | YWHAG    | 7  | 76326794  | 76359031  | protein_coding | 23,79 | 0 |
| ENSG00000162458 | FBLIM1   | 1  | 15756607  | 15786594  | protein_coding | 23,79 | 0 |
| ENSG00000185716 | C16orf52 | 16 | 22007638  | 22087534  | protein_coding | 23,79 | 0 |
| ENSG00000176490 | DIRAS1   | 19 | 2714567   | 2721418   | protein_coding | 23,77 | 0 |
| ENSG00000108830 | RND2     | 17 | 43025241  | 43032036  | protein_coding | 23,73 | 0 |
| ENSG00000214087 | ARL16    | 17 | 81681174  | 81683924  | protein_coding | 23,73 | 0 |
| ENSG00000166484 | MAPK7    | 17 | 19377721  | 19383544  | protein_coding | 23,73 | 0 |
| ENSG00000159176 | CSRP1    | 1  | 201483530 | 201509456 | protein_coding | 23,73 | 0 |
| ENSG00000113555 | PCDH12   | 5  | 141943585 | 141969741 | protein_coding | 23,71 | 0 |
| ENSG00000169905 | TOR1AIP2 | 1  | 179839967 | 179877803 | protein_coding | 23,70 | 0 |
| ENSG00000143624 | INTS3    | 1  | 153728067 | 153774808 | protein_coding | 23,70 | 0 |
| ENSG00000161526 | SAP30BP  | 17 | 75667116  | 75708062  | protein_coding | 23,70 | 0 |
| ENSG00000138073 | PREB     | 2  | 27130756  | 27134675  | protein_coding | 23,68 | 0 |
| ENSG00000123159 | GIPC1    | 19 | 14477760  | 14496149  | protein_coding | 23,68 | 0 |
| ENSG00000100401 | RANGAP1  | 22 | 41245611  | 41286251  | protein_coding | 23,66 | 0 |
| ENSG00000124615 | MOCS1    | 6  | 39899578  | 39934551  | protein_coding | 23,65 | 0 |
| ENSG00000182934 | SRPR     | 11 | 126262919 | 126269144 | protein_coding | 23,65 | 0 |
| ENSG00000165417 | GTF2A1   | 14 | 81175452  | 81221377  | protein_coding | 23,64 | 0 |
| ENSG00000084693 | AGBL5    | 2  | 27042364  | 27070622  | protein_coding | 23,63 | 0 |
| ENSG00000100319 | ZMAT5    | 22 | 29730956  | 29767011  | protein_coding | 23,62 | 0 |
| ENSG00000114757 | PEX5L    | 3  | 179794958 | 180037053 | protein_coding | 23,62 | 0 |
| ENSG00000184908 | CLCNKB   | 1  | 16043736  | 16057308  | protein_coding | 23,60 | 0 |
| ENSG00000187079 | TEAD1    | 11 | 12674591  | 12944483  | protein_coding | 23,58 | 0 |
| ENSG00000134910 | STT3A    | 11 | 125591712 | 125625215 | protein_coding | 23,57 | 0 |
| ENSG00000198890 | PRMT6    | 1  | 107056679 | 107059294 | protein_coding | 23,56 | 0 |
| ENSG00000138095 | LRPPRC   | 2  | 43886508  | 43996005  | protein_coding | 23,54 | 0 |
| ENSG00000152443 | ZNF776   | 19 | 57746796  | 57758159  | protein_coding | 23,52 | 0 |
| ENSG00000205560 | CPT1B    | 22 | 50568861  | 50578465  | protein_coding | 23,50 | 0 |
| ENSG00000151458 | ANKRD50  | 4  | 124664052 | 124712732 | protein_coding | 23,46 | 0 |
| ENSG00000185000 | DGAT1    | 8  | 144314584 | 144326910 | protein_coding | 23,43 | 0 |
| ENSG00000177302 | TOP3A    | 17 | 18271428  | 18315007  | protein_coding | 23,43 | 0 |
| ENSG00000104884 | ERCC2    | 19 | 45349837  | 45370918  | protein_coding | 23,42 | 0 |
| ENSG00000167395 | ZNF646   | 16 | 31074422  | 31084196  | protein_coding | 23,40 | 0 |
| ENSG00000176171 | BNIP3    | 10 | 131966455 | 131982013 | protein_coding | 23,39 | 0 |
| ENSG00000151117 | TMEM86A  | 11 | 18693122  | 18704785  | protein_coding | 23,39 | 0 |
| ENSG00000159692 | CTBP1    | 4  | 1211448   | 1249953   | protein_coding | 23,39 | 0 |
| ENSG00000108883 | EFTUD2   | 17 | 44849943  | 44899662  | protein_coding | 23,39 | 0 |
| ENSG00000165684 | SNAPC4   | 9  | 136375577 | 136398797 | protein_coding | 23,37 | 0 |
| ENSG00000167700 | MFSD3    | 8  | 144509074 | 144511213 | protein_coding | 23,37 | 0 |
| ENSG00000188677 | PARVB    | 22 | 43999211  | 44172949  | protein_coding | 23,36 | 0 |
| ENSG00000027075 | PRKCH    | 14 | 61187559  | 61550976  | protein_coding | 23,35 | 0 |
| ENSG00000203950 | FAM127B  | X  | 135050932 | 135052196 | protein_coding | 23,34 | 0 |
| ENSG00000213930 | GALT     | 9  | 34638133  | 34651035  | protein_coding | 23,31 | 0 |
| ENSG00000143321 | HDGF     | 1  | 156742107 | 156766925 | protein_coding | 23,30 | 0 |
| ENSG00000119711 | ALDH6A1  | 14 | 74056850  | 74084493  | protein_coding | 23,29 | 0 |
| ENSG00000165410 | CFL2     | 14 | 34706769  | 34714823  | protein_coding | 23,27 | 0 |
| ENSG00000165752 | STK32C   | 10 | 132207492 | 132331847 | protein_coding | 23,27 | 0 |
| ENSG00000172273 | HINFP    | 11 | 119121587 | 119136044 | protein_coding | 23,26 | 0 |
| ENSG00000140632 | GLYR1    | 16 | 4803203   | 4847342   | protein_coding | 23,24 | 0 |
| ENSG00000172671 | ZFAND4   | 10 | 45615501  | 45672780  | protein_coding | 23,24 | 0 |
| ENSG00000112667 | DNP1     | 6  | 43225629  | 43229484  | protein_coding | 23,21 | 0 |
| ENSG00000173926 | 03-mars  | 5  | 126867714 | 127030808 | protein_coding | 23,21 | 0 |
| ENSG00000033627 | ATP6VOA1 | 17 | 42458844  | 42522611  | protein_coding | 23,21 | 0 |

|                 |            |    |           |           |                |       |   |
|-----------------|------------|----|-----------|-----------|----------------|-------|---|
| ENSG00000178789 | CD300LB    | 17 | 74521174  | 74531474  | protein_coding | 23,20 | 0 |
| ENSG00000112299 | VNN1       | 6  | 132681590 | 132714049 | protein_coding | 23,20 | 0 |
| ENSG00000120328 | PCDHB12    | 5  | 141208697 | 141212571 | protein_coding | 23,20 | 0 |
| ENSG00000100418 | DESI1      | 22 | 41598028  | 41621096  | protein_coding | 23,20 | 0 |
| ENSG00000138303 | ASCC1      | 10 | 72096032  | 72217134  | protein_coding | 23,19 | 0 |
| ENSG00000054983 | GALC       | 14 | 87837820  | 87993665  | protein_coding | 23,19 | 0 |
| ENSG00000014919 | COX15      | 10 | 99711844  | 99732100  | protein_coding | 23,16 | 0 |
| ENSG00000160201 | U2AF1      | 21 | 43092956  | 43107587  | protein_coding | 23,16 | 0 |
| ENSG00000092531 | SNAP23     | 15 | 42491233  | 42545356  | protein_coding | 23,14 | 0 |
| ENSG00000168393 | DTYMK      | 2  | 241675742 | 241686991 | protein_coding | 23,12 | 0 |
| ENSG00000197837 | HIST4H4    | 12 | 14767999  | 14771131  | protein_coding | 23,10 | 0 |
| ENSG00000214290 | COLCA2     | 11 | 111298546 | 111308735 | protein_coding | 23,09 | 0 |
| ENSG00000138029 | HADHB      | 2  | 26243170  | 26290468  | protein_coding | 23,09 | 0 |
| ENSG00000166676 | TVP23A     | 16 | 10760919  | 10818794  | protein_coding | 23,08 | 0 |
| ENSG00000183628 | DGCR6      | 22 | 18906028  | 18914238  | protein_coding | 23,07 | 0 |
| ENSG00000108528 | SLC25A11   | 17 | 4937130   | 4940251   | protein_coding | 23,04 | 0 |
| ENSG00000166333 | ILK        | 11 | 6603708   | 6610874   | protein_coding | 23,04 | 0 |
| ENSG00000185624 | P4HB       | 17 | 81843159  | 81860694  | protein_coding | 23,04 | 0 |
| ENSG00000149084 | HSD17B12   | 11 | 43556436  | 43856617  | protein_coding | 23,03 | 0 |
| ENSG00000205609 | EIF3CL     | 16 | 28379579  | 28403879  | protein_coding | 23,00 | 0 |
| ENSG00000117308 | GALE       | 1  | 23795599  | 23800804  | protein_coding | 23,00 | 0 |
| ENSG00000281741 | ENSG000002 | 1  | 120913151 | 120914238 | protein_coding | 23,00 | 0 |
| ENSG00000100104 | SRRD       | 22 | 26483877  | 26494658  | protein_coding | 22,99 | 0 |
| ENSG00000115204 | MPV17      | 2  | 27309492  | 27325680  | protein_coding | 22,99 | 0 |
| ENSG00000007171 | NOS2       | 17 | 27756766  | 27800499  | protein_coding | 22,96 | 0 |
| ENSG00000076053 | RBM7       | 11 | 114400030 | 114414203 | protein_coding | 22,94 | 0 |
| ENSG00000102870 | ZNF629     | 16 | 30778449  | 30787202  | protein_coding | 22,91 | 0 |
| ENSG00000273259 | ENSG000002 | 14 | 94592058  | 94624646  | protein_coding | 22,90 | 0 |
| ENSG00000165457 | FOLR2      | 11 | 72216601  | 72221950  | protein_coding | 22,90 | 0 |
| ENSG00000168334 | XIRP1      | 3  | 39183210  | 39192596  | protein_coding | 22,90 | 0 |
| ENSG00000160325 | CACFD1     | 9  | 133459965 | 133470848 | protein_coding | 22,89 | 0 |
| ENSG00000178952 | TUFM       | 16 | 28842411  | 28846408  | protein_coding | 22,87 | 0 |
| ENSG00000143845 | ETNK2      | 1  | 204131062 | 204152003 | protein_coding | 22,84 | 0 |
| ENSG00000144381 | HSPD1      | 2  | 197486581 | 197516737 | protein_coding | 22,80 | 0 |
| ENSG00000114867 | EIF4G1     | 3  | 184314495 | 184335358 | protein_coding | 22,80 | 0 |
| ENSG00000177576 | C18orf32   | 18 | 49477250  | 49487252  | protein_coding | 22,80 | 0 |
| ENSG00000183682 | BMP8A      | 1  | 39491646  | 39525935  | protein_coding | 22,80 | 0 |
| ENSG00000100632 | ERH        | 14 | 69380123  | 69398627  | protein_coding | 22,80 | 0 |
| ENSG00000171853 | TRAPPC12   | 2  | 3379675   | 3485094   | protein_coding | 22,79 | 0 |
| ENSG00000114480 | GBE1       | 3  | 81489699  | 81762161  | protein_coding | 22,75 | 0 |
| ENSG00000115307 | AUP1       | 2  | 74526645  | 74529939  | protein_coding | 22,75 | 0 |
| ENSG00000165312 | OTUD1      | 10 | 23439458  | 23442390  | protein_coding | 22,71 | 0 |
| ENSG00000138696 | BMPR1B     | 4  | 94757968  | 95158448  | protein_coding | 22,71 | 0 |
| ENSG00000176435 | CLEC14A    | 14 | 38254103  | 38256369  | protein_coding | 22,70 | 0 |
| ENSG00000001617 | SEMA3F     | 3  | 50155045  | 50189075  | protein_coding | 22,70 | 0 |
| ENSG00000177873 | ZNF619     | 3  | 40477113  | 40490236  | protein_coding | 22,68 | 0 |
| ENSG00000139163 | ETNK1      | 12 | 22625075  | 22690665  | protein_coding | 22,68 | 0 |
| ENSG00000204463 | BAG6       | 6  | 31639028  | 31652705  | protein_coding | 22,67 | 0 |
| ENSG00000175938 | ORAI3      | 16 | 30949066  | 30956461  | protein_coding | 22,66 | 0 |
| ENSG00000105576 | TNPO2      | 19 | 12699194  | 12724011  | protein_coding | 22,63 | 0 |
| ENSG00000074755 | ZZEF1      | 17 | 4004445   | 4143020   | protein_coding | 22,62 | 0 |
| ENSG00000173264 | GPR137     | 11 | 64270062  | 64289500  | protein_coding | 22,61 | 0 |
| ENSG00000116641 | DOCK7      | 1  | 62454726  | 62688368  | protein_coding | 22,60 | 0 |
| ENSG00000185515 | BRCC3      | X  | 155071420 | 155123074 | protein_coding | 22,59 | 0 |
| ENSG00000275700 | AATF       | 17 | 36948875  | 37056871  | protein_coding | 22,58 | 0 |
| ENSG00000173786 | CNP        | 17 | 41966741  | 41977731  | protein_coding | 22,57 | 0 |
| ENSG00000010671 | BTK        | X  | 101349447 | 101390796 | protein_coding | 22,56 | 0 |
| ENSG00000068024 | HDAC4      | 2  | 239048168 | 239401654 | protein_coding | 22,56 | 0 |



|                 |                 |    |           |           |                |       |   |
|-----------------|-----------------|----|-----------|-----------|----------------|-------|---|
| ENSG00000204308 | RNF5            | 6  | 32178354  | 32180793  | protein_coding | 22,52 | 0 |
| ENSG00000264058 | ENSG00000264058 | 17 | 40628797  | 40665141  | protein_coding | 22,50 | 0 |
| ENSG00000173267 | SNCG            | 10 | 86958618  | 86963260  | protein_coding | 22,50 | 0 |
| ENSG00000155749 | ALS2CR12        | 2  | 201288271 | 201357398 | protein_coding | 22,50 | 0 |
| ENSG00000152595 | MEPE            | 4  | 87821411  | 87846817  | protein_coding | 22,45 | 0 |
| ENSG00000174243 | DDX23           | 12 | 48829764  | 48852842  | protein_coding | 22,43 | 0 |
| ENSG00000101945 | SUV39H1         | X  | 48695554  | 48709012  | protein_coding | 22,42 | 0 |
| ENSG00000235863 | B3GALT4         | 6  | 33277132  | 33284832  | protein_coding | 22,41 | 0 |
| ENSG00000137877 | SPTBN5          | 15 | 41848144  | 41894077  | protein_coding | 22,41 | 0 |
| ENSG00000137409 | MTCH1           | 6  | 36968141  | 36986298  | protein_coding | 22,41 | 0 |
| ENSG00000186866 | POFUT2          | 21 | 45263928  | 45287898  | protein_coding | 22,40 | 0 |
| ENSG00000244274 | DBNDD2          | 20 | 45406057  | 45410610  | protein_coding | 22,40 | 0 |
| ENSG00000102935 | ZNF423          | 16 | 49487524  | 49857919  | protein_coding | 22,40 | 0 |
| ENSG00000100344 | PNPLA3          | 22 | 43923739  | 43964488  | protein_coding | 22,39 | 0 |
| ENSG00000175467 | SART1           | 11 | 65961689  | 65979828  | protein_coding | 22,37 | 0 |
| ENSG00000011243 | AKAP8L          | 19 | 15380048  | 15419141  | protein_coding | 22,36 | 0 |
| ENSG00000167548 | KMT2D           | 12 | 49018975  | 49059774  | protein_coding | 22,34 | 0 |
| ENSG00000154856 | APCDD1          | 18 | 10454628  | 10489948  | protein_coding | 22,33 | 0 |
| ENSG00000126461 | SCAF1           | 19 | 49642125  | 49658642  | protein_coding | 22,33 | 0 |
| ENSG00000127952 | STYXL1          | 7  | 75996338  | 76048004  | protein_coding | 22,30 | 0 |
| ENSG00000073008 | PVR             | 19 | 44643798  | 44663583  | protein_coding | 22,30 | 0 |
| ENSG00000136758 | YME1L1          | 10 | 27110112  | 27155266  | protein_coding | 22,30 | 0 |
| ENSG00000188133 | TMEM215         | 9  | 32783499  | 32787399  | protein_coding | 22,30 | 0 |
| ENSG00000204315 | FKBPL           | 6  | 32128707  | 32130291  | protein_coding | 22,29 | 0 |
| ENSG00000278540 | ACACA           | 17 | 37084988  | 37406818  | protein_coding | 22,27 | 0 |
| ENSG00000106459 | NRF1            | 7  | 129611714 | 129757082 | protein_coding | 22,27 | 0 |
| ENSG00000189091 | SF3B3           | 16 | 70523788  | 70577670  | protein_coding | 22,27 | 0 |
| ENSG00000143226 | FCGR2A          | 1  | 161505430 | 161524013 | protein_coding | 22,25 | 0 |
| ENSG00000112096 | SOD2            | 6  | 159669057 | 159762529 | protein_coding | 22,22 | 0 |
| ENSG00000255302 | EID1            | 15 | 48877886  | 48880183  | protein_coding | 22,21 | 0 |
| ENSG00000184209 | SNRNP35         | 12 | 123457641 | 123473154 | protein_coding | 22,21 | 0 |
| ENSG00000176723 | ZNF843          | 16 | 31432593  | 31443160  | protein_coding | 22,20 | 0 |
| ENSG00000135898 | GPR55           | 2  | 230907318 | 230961066 | protein_coding | 22,20 | 0 |
| ENSG00000197451 | HNRNPAB         | 5  | 178204507 | 178211180 | protein_coding | 22,19 | 0 |
| ENSG00000116981 | NT5C1A          | 1  | 39659121  | 39672038  | protein_coding | 22,17 | 0 |
| ENSG00000131779 | PEX11B          | 1  | 145911350 | 145918837 | protein_coding | 22,16 | 0 |
| ENSG00000137216 | TMEM63B         | 6  | 44126914  | 44155519  | protein_coding | 22,16 | 0 |
| ENSG00000165782 | TMEM55B         | 14 | 20457719  | 20461612  | protein_coding | 22,14 | 0 |
| ENSG00000125170 | DOK4            | 16 | 57471922  | 57487327  | protein_coding | 22,14 | 0 |
| ENSG00000100124 | ANKRD54         | 22 | 37830855  | 37849327  | protein_coding | 22,13 | 0 |
| ENSG00000188229 | TUBB4B          | 9  | 137241213 | 137243707 | protein_coding | 22,12 | 0 |
| ENSG00000145990 | GFOD1           | 6  | 13357830  | 13487662  | protein_coding | 22,11 | 0 |
| ENSG00000116903 | EXOC8           | 1  | 231332753 | 231337852 | protein_coding | 22,10 | 0 |
| ENSG00000108370 | RGS9            | 17 | 65137431  | 65227703  | protein_coding | 22,10 | 0 |
| ENSG00000196866 | HIST1H2AD       | 6  | 26198851  | 26199243  | protein_coding | 22,10 | 0 |
| ENSG00000158473 | CD1D            | 1  | 158179947 | 158184896 | protein_coding | 22,10 | 0 |
| ENSG00000136731 | UGGT1           | 2  | 128091200 | 128195677 | protein_coding | 22,09 | 0 |
| ENSG00000196408 | NOXO1           | 16 | 1978917   | 1984192   | protein_coding | 22,09 | 0 |
| ENSG00000080561 | MID2            | X  | 107825755 | 107927193 | protein_coding | 22,09 | 0 |
| ENSG00000185567 | AHNAK2          | 14 | 104937244 | 104978357 | protein_coding | 22,08 | 0 |
| ENSG00000003989 | SLC7A2          | 8  | 17497088  | 17570573  | protein_coding | 22,08 | 0 |
| ENSG00000174231 | PRPF8           | 17 | 1650629   | 1684882   | protein_coding | 22,06 | 0 |
| ENSG00000153187 | HNRNPU          | 1  | 244851166 | 244864542 | protein_coding | 22,05 | 0 |
| ENSG00000170734 | POLH            | 6  | 43576150  | 43615660  | protein_coding | 22,05 | 0 |
| ENSG00000122707 | RECK            | 9  | 36036433  | 36124451  | protein_coding | 22,01 | 0 |
| ENSG00000100350 | FOXRED2         | 22 | 36487190  | 36507101  | protein_coding | 22,01 | 0 |
| ENSG00000099204 | ABLIM1          | 10 | 114431113 | 114685003 | protein_coding | 22,01 | 0 |
| ENSG00000178127 | NDUFV2          | 18 | 9102630   | 9134345   | protein_coding | 22,00 | 0 |

|                 |           |    |           |           |                |       |   |
|-----------------|-----------|----|-----------|-----------|----------------|-------|---|
| ENSG00000241935 | HOGA1     | 10 | 97584323  | 97612802  | protein_coding | 22,00 | 0 |
| ENSG0000060138  | YBX3      | 12 | 10699089  | 10723312  | protein_coding | 21,99 | 0 |
| ENSG00000108061 | SHOC2     | 10 | 110919547 | 111013667 | protein_coding | 21,99 | 0 |
| ENSG00000066926 | FECH      | 18 | 57548283  | 57586772  | protein_coding | 21,99 | 0 |
| ENSG00000077264 | PAK3      | X  | 110944285 | 111227361 | protein_coding | 21,98 | 0 |
| ENSG00000133619 | KRBA1     | 7  | 149714781 | 149734575 | protein_coding | 21,98 | 0 |
| ENSG00000111667 | USP5      | 12 | 6852128   | 6866632   | protein_coding | 21,98 | 0 |
| ENSG00000172375 | C2CD2L    | 11 | 119102198 | 119118544 | protein_coding | 21,97 | 0 |
| ENSG00000100714 | MTHFD1    | 14 | 64388031  | 64463457  | protein_coding | 21,97 | 0 |
| ENSG00000196407 | THEM5     | 1  | 151847263 | 151853697 | protein_coding | 21,97 | 0 |
| ENSG00000090861 | AARS      | 16 | 70252295  | 70289543  | protein_coding | 21,95 | 0 |
| ENSG00000110047 | EHD1      | 11 | 64851642  | 64888296  | protein_coding | 21,95 | 0 |
| ENSG00000148400 | NOTCH1    | 9  | 136494444 | 136545862 | protein_coding | 21,95 | 0 |
| ENSG00000078814 | MYH7B     | 20 | 34975403  | 35002437  | protein_coding | 21,94 | 0 |
| ENSG00000163638 | ADAMTS9   | 3  | 64515654  | 64688000  | protein_coding | 21,93 | 0 |
| ENSG00000111058 | ACSS3     | 12 | 80936414  | 81261205  | protein_coding | 21,93 | 0 |
| ENSG00000189060 | H1FO      | 22 | 37805093  | 37807436  | protein_coding | 21,92 | 0 |
| ENSG00000017427 | IGF1      | 12 | 102395867 | 102480645 | protein_coding | 21,90 | 0 |
| ENSG00000120727 | PAIP2     | 5  | 139341587 | 139369720 | protein_coding | 21,88 | 0 |
| ENSG00000115556 | PLCD4     | 2  | 218607765 | 218637184 | protein_coding | 21,88 | 0 |
| ENSG00000149182 | ARFGAP2   | 11 | 47164299  | 47177125  | protein_coding | 21,87 | 0 |
| ENSG00000179168 | GGN       | 19 | 38384265  | 38388082  | protein_coding | 21,85 | 0 |
| ENSG00000272674 | PCDHB16   | 5  | 141181399 | 141186399 | protein_coding | 21,85 | 0 |
| ENSG00000143811 | PYCR2     | 1  | 225919877 | 225924340 | protein_coding | 21,84 | 0 |
| ENSG00000197119 | SLC25A29  | 14 | 100291111 | 100306547 | protein_coding | 21,82 | 0 |
| ENSG00000171159 | C9orf16   | 9  | 128160260 | 128163928 | protein_coding | 21,81 | 0 |
| ENSG00000010256 | UQCRC1    | 3  | 48599002  | 48610976  | protein_coding | 21,80 | 0 |
| ENSG00000169592 | INO80E    | 16 | 29995294  | 30005793  | protein_coding | 21,80 | 0 |
| ENSG00000092529 | CAPN3     | 15 | 42359500  | 42412318  | protein_coding | 21,80 | 0 |
| ENSG00000185345 | PARK2     | 6  | 161347420 | 162727771 | protein_coding | 21,80 | 0 |
| ENSG00000122741 | DCAF10    | 9  | 37800502  | 37867666  | protein_coding | 21,80 | 0 |
| ENSG00000175115 | PACS1     | 11 | 66070363  | 66244747  | protein_coding | 21,80 | 0 |
| ENSG00000131759 | RARA      | 17 | 40309192  | 40357643  | protein_coding | 21,78 | 0 |
| ENSG00000069275 | NUCKS1    | 1  | 205712819 | 205750276 | protein_coding | 21,78 | 0 |
| ENSG00000160211 | G6PD      | X  | 154531391 | 154547572 | protein_coding | 21,75 | 0 |
| ENSG00000153214 | TMEM87B   | 2  | 112055223 | 112119318 | protein_coding | 21,73 | 0 |
| ENSG00000172543 | CTSW      | 11 | 65879809  | 65883741  | protein_coding | 21,70 | 0 |
| ENSG00000143340 | FAM163A   | 1  | 179743163 | 179816198 | protein_coding | 21,70 | 0 |
| ENSG00000138760 | SCARB2    | 4  | 76158737  | 76213893  | protein_coding | 21,69 | 0 |
| ENSG00000213347 | MXD3      | 5  | 177301461 | 177312757 | protein_coding | 21,65 | 0 |
| ENSG00000165678 | GHITM     | 10 | 84139440  | 84153555  | protein_coding | 21,64 | 0 |
| ENSG00000100519 | PSMC6     | 14 | 52707172  | 52728587  | protein_coding | 21,64 | 0 |
| ENSG00000184307 | ZDHHC23   | 3  | 113947901 | 113965401 | protein_coding | 21,63 | 0 |
| ENSG00000108960 | MMD       | 17 | 55392613  | 55421992  | protein_coding | 21,62 | 0 |
| ENSG00000018189 | RUFY3     | 4  | 70704204  | 70807315  | protein_coding | 21,62 | 0 |
| ENSG00000142002 | DPP9      | 19 | 4675224   | 4724673   | protein_coding | 21,61 | 0 |
| ENSG00000178093 | TSSK6     | 19 | 19512418  | 19515685  | protein_coding | 21,60 | 0 |
| ENSG00000169689 | STRA13    | 17 | 82018702  | 82024107  | protein_coding | 21,60 | 0 |
| ENSG00000180884 | ZNF792    | 19 | 34956354  | 34964049  | protein_coding | 21,59 | 0 |
| ENSG00000254004 | ZNF260    | 19 | 36510695  | 36528660  | protein_coding | 21,59 | 0 |
| ENSG00000167676 | PLIN4     | 19 | 4502180   | 4518465   | protein_coding | 21,58 | 0 |
| ENSG00000185829 | ARL17A    | 17 | 46516702  | 46579722  | protein_coding | 21,58 | 0 |
| ENSG00000053918 | KCNQ1     | 11 | 2444684   | 2849109   | protein_coding | 21,58 | 0 |
| ENSG00000114395 | CYB561D2  | 3  | 50350695  | 50358460  | protein_coding | 21,57 | 0 |
| ENSG00000203727 | SAMD5     | 6  | 147508927 | 147737547 | protein_coding | 21,56 | 0 |
| ENSG00000138002 | IFT172    | 2  | 27444371  | 27489789  | protein_coding | 21,56 | 0 |
| ENSG00000135631 | RAB11FIP5 | 2  | 73073382  | 73156721  | protein_coding | 21,56 | 0 |
| ENSG00000198420 | TCAF1     | 7  | 143851375 | 143902198 | protein_coding | 21,55 | 0 |

|                 |            |    |           |           |                |       |   |
|-----------------|------------|----|-----------|-----------|----------------|-------|---|
| ENSG00000167476 | JSRP1      | 19 | 2252252   | 2269759   | protein_coding | 21,54 | 0 |
| ENSG00000170832 | USP32      | 17 | 60179094  | 60422470  | protein_coding | 21,54 | 0 |
| ENSG00000198001 | IRAK4      | 12 | 43758944  | 43789543  | protein_coding | 21,53 | 0 |
| ENSG00000164684 | ZNF704     | 8  | 80628451  | 80874781  | protein_coding | 21,52 | 0 |
| ENSG00000150779 | TIMM8B     | 11 | 112084800 | 112086798 | protein_coding | 21,50 | 0 |
| ENSG00000188986 | NELFB      | 9  | 137255173 | 137273547 | protein_coding | 21,50 | 0 |
| ENSG00000128383 | APOBEC3A   | 22 | 38952741  | 38992778  | protein_coding | 21,50 | 0 |
| ENSG0000020181  | ADGRA2     | 8  | 37784191  | 37844896  | protein_coding | 21,47 | 0 |
| ENSG00000163382 | APOA1BP    | 1  | 156591762 | 156594299 | protein_coding | 21,47 | 0 |
| ENSG00000198551 | ZNF627     | 19 | 11559374  | 11619135  | protein_coding | 21,45 | 0 |
| ENSG00000167207 | NOD2       | 16 | 50693603  | 50733077  | protein_coding | 21,44 | 0 |
| ENSG00000068878 | PSME4      | 2  | 53864067  | 53970840  | protein_coding | 21,44 | 0 |
| ENSG00000107036 | RIC1       | 9  | 5629025   | 5776557   | protein_coding | 21,43 | 0 |
| ENSG00000142082 | SIRT3      | 11 | 215458    | 236931    | protein_coding | 21,42 | 0 |
| ENSG00000142733 | MAP3K6     | 1  | 27355184  | 27366892  | protein_coding | 21,41 | 0 |
| ENSG00000168453 | HR         | 8  | 22114415  | 22133384  | protein_coding | 21,40 | 0 |
| ENSG00000174500 | GCSAM      | 3  | 112120841 | 112133305 | protein_coding | 21,40 | 0 |
| ENSG00000223658 | C1GALT1C1l | 2  | 43675151  | 43676322  | protein_coding | 21,40 | 0 |
| ENSG00000101246 | ARFRP1     | 20 | 63698642  | 63708025  | protein_coding | 21,39 | 0 |
| ENSG00000162086 | ZNF75A     | 16 | 3305406   | 3318852   | protein_coding | 21,39 | 0 |
| ENSG00000197121 | PGAP1      | 2  | 196833004 | 196927796 | protein_coding | 21,38 | 0 |
| ENSG00000128791 | TWSG1      | 18 | 9334767   | 9402420   | protein_coding | 21,37 | 0 |
| ENSG00000127947 | PTPN12     | 7  | 77537275  | 77640071  | protein_coding | 21,37 | 0 |
| ENSG00000057704 | TMCC3      | 12 | 94567124  | 94650562  | protein_coding | 21,37 | 0 |
| ENSG00000111816 | FRK        | 6  | 115931149 | 116060758 | protein_coding | 21,36 | 0 |
| ENSG00000143771 | CNIH4      | 1  | 224356850 | 224379459 | protein_coding | 21,35 | 0 |
| ENSG00000169919 | GUSB       | 7  | 65960684  | 65982314  | protein_coding | 21,33 | 0 |
| ENSG00000187051 | RPS19BP1   | 22 | 39529093  | 39532855  | protein_coding | 21,33 | 0 |
| ENSG00000104969 | SGTA       | 19 | 2754714   | 2783371   | protein_coding | 21,32 | 0 |
| ENSG00000155367 | PPM1J      | 1  | 112709994 | 112715477 | protein_coding | 21,30 | 0 |
| ENSG00000204713 | TRIM27     | 6  | 28903002  | 28923989  | protein_coding | 21,28 | 0 |
| ENSG00000113240 | CLK4       | 5  | 178602664 | 178630615 | protein_coding | 21,28 | 0 |
| ENSG00000142409 | ZNF787     | 19 | 56087366  | 56121280  | protein_coding | 21,28 | 0 |
| ENSG00000136450 | SRSF1      | 17 | 58003360  | 58007346  | protein_coding | 21,25 | 0 |
| ENSG00000163481 | RNF25      | 2  | 218663864 | 218672411 | protein_coding | 21,24 | 0 |
| ENSG00000142303 | ADAMTS10   | 19 | 8580242   | 8610735   | protein_coding | 21,24 | 0 |
| ENSG00000168264 | IRF2BP2    | 1  | 234604269 | 234609525 | protein_coding | 21,19 | 0 |
| ENSG00000074054 | CLASP1     | 2  | 121337776 | 121649587 | protein_coding | 21,16 | 0 |
| ENSG00000164022 | AIMP1      | 4  | 106315544 | 106349226 | protein_coding | 21,12 | 0 |
| ENSG00000108448 | TRIM16L    | 17 | 18697998  | 18736118  | protein_coding | 21,10 | 0 |
| ENSG00000253910 | PCDHGB2    | 5  | 141360042 | 141512979 | protein_coding | 21,10 | 0 |
| ENSG00000147166 | ITGB1BP2   | X  | 71301734  | 71305371  | protein_coding | 21,10 | 0 |
| ENSG00000167191 | GPRC5B     | 16 | 19856691  | 19886167  | protein_coding | 21,07 | 0 |
| ENSG00000153250 | RBMS1      | 2  | 160272151 | 160493794 | protein_coding | 21,06 | 0 |
| ENSG00000090372 | STRN4      | 19 | 46719507  | 46746994  | protein_coding | 21,06 | 0 |
| ENSG00000005187 | ACSM3      | 16 | 20610243  | 20797581  | protein_coding | 21,05 | 0 |
| ENSG00000141337 | ARSG       | 17 | 68259182  | 68422731  | protein_coding | 21,05 | 0 |
| ENSG00000173933 | RBM4       | 11 | 66638617  | 66666682  | protein_coding | 21,04 | 0 |
| ENSG00000065526 | SPEN       | 1  | 15847864  | 15940460  | protein_coding | 21,03 | 0 |
| ENSG00000132718 | SYT11      | 1  | 155859509 | 155885199 | protein_coding | 21,02 | 0 |
| ENSG00000121858 | TNFSF10    | 3  | 172505508 | 172523507 | protein_coding | 21,00 | 0 |
| ENSG00000235169 | SMIM1      | 1  | 3772788   | 3775982   | protein_coding | 20,96 | 0 |
| ENSG00000110375 | UPK2       | 11 | 118925164 | 118958559 | protein_coding | 20,95 | 0 |
| ENSG00000188554 | NBR1       | 17 | 43170481  | 43211689  | protein_coding | 20,94 | 0 |
| ENSG00000119408 | NEK6       | 9  | 124257606 | 124353307 | protein_coding | 20,93 | 0 |
| ENSG00000204618 | RNF39      | 6  | 30070266  | 30075887  | protein_coding | 20,91 | 0 |
| ENSG00000177455 | CD19       | 16 | 28931939  | 28939346  | protein_coding | 20,90 | 0 |
| ENSG00000170681 | MURC       | 9  | 100578079 | 100587906 | protein_coding | 20,90 | 0 |

|                 |           |    |           |           |                |       |   |
|-----------------|-----------|----|-----------|-----------|----------------|-------|---|
| ENSG00000162552 | WNT4      | 1  | 22117305  | 22143969  | protein_coding | 20,90 | 0 |
| ENSG00000102053 | ZC3H12B   | X  | 65366638  | 65507887  | protein_coding | 20,90 | 0 |
| ENSG00000180900 | SCRIB     | 8  | 143790920 | 143815379 | protein_coding | 20,87 | 0 |
| ENSG00000183475 | ASB7      | 15 | 100602534 | 100651705 | protein_coding | 20,85 | 0 |
| ENSG00000163577 | EIF5A2    | 3  | 170888415 | 170908693 | protein_coding | 20,85 | 0 |
| ENSG00000180694 | TMEM64    | 8  | 90621995  | 90791632  | protein_coding | 20,85 | 0 |
| ENSG00000087884 | AAMDC     | 11 | 77821109  | 77918432  | protein_coding | 20,81 | 0 |
| ENSG00000101019 | UQCC1     | 20 | 35302566  | 35412141  | protein_coding | 20,81 | 0 |
| ENSG00000123395 | ATG101    | 12 | 52069246  | 52077494  | protein_coding | 20,80 | 0 |
| ENSG00000180596 | HIST1H2BC | 6  | 26114873  | 26123926  | protein_coding | 20,80 | 0 |
| ENSG00000203797 | DDO       | 6  | 110391771 | 110415562 | protein_coding | 20,80 | 0 |
| ENSG00000172366 | FAM195A   | 16 | 636817    | 648474    | protein_coding | 20,77 | 0 |
| ENSG00000126561 | STAT5A    | 17 | 42287547  | 42311943  | protein_coding | 20,77 | 0 |
| ENSG00000132792 | CTNBL1    | 20 | 37693955  | 37872129  | protein_coding | 20,74 | 0 |
| ENSG00000167701 | GPT       | 8  | 144502973 | 144507174 | protein_coding | 20,73 | 0 |
| ENSG00000117676 | RPS6KA1   | 1  | 26529761  | 26575030  | protein_coding | 20,72 | 0 |
| ENSG00000106617 | PRKAG2    | 7  | 151556111 | 151877125 | protein_coding | 20,70 | 0 |
| ENSG00000154059 | IMPACT    | 18 | 24426616  | 24453535  | protein_coding | 20,69 | 0 |
| ENSG00000114529 | C3orf52   | 3  | 112086335 | 112131004 | protein_coding | 20,69 | 0 |
| ENSG00000037749 | MFAP3     | 5  | 154038906 | 154220478 | protein_coding | 20,68 | 0 |
| ENSG00000146223 | RPL7L1    | 6  | 42879618  | 42889925  | protein_coding | 20,67 | 0 |
| ENSG00000175575 | PAAF1     | 11 | 73876699  | 73931124  | protein_coding | 20,66 | 0 |
| ENSG00000197081 | IGF2R     | 6  | 159969099 | 160113507 | protein_coding | 20,66 | 0 |
| ENSG00000149716 | ORAOV1    | 11 | 69653076  | 69675416  | protein_coding | 20,64 | 0 |
| ENSG00000119471 | HSDL2     | 9  | 112379937 | 112472410 | protein_coding | 20,64 | 0 |
| ENSG00000115274 | INO80B    | 2  | 74455023  | 74457960  | protein_coding | 20,64 | 0 |
| ENSG00000132196 | HSD17B7   | 1  | 162790702 | 162812817 | protein_coding | 20,61 | 0 |
| ENSG00000112078 | KCTD20    | 6  | 36442767  | 36491143  | protein_coding | 20,61 | 0 |
| ENSG00000151490 | PTPRO     | 12 | 15322397  | 15597399  | protein_coding | 20,60 | 0 |
| ENSG00000183784 | C9orf66   | 9  | 212824    | 215741    | protein_coding | 20,60 | 0 |
| ENSG00000198408 | MGEA5     | 10 | 101784443 | 101818465 | protein_coding | 20,59 | 0 |
| ENSG00000170921 | TANC2     | 17 | 63009556  | 63427699  | protein_coding | 20,57 | 0 |
| ENSG00000131100 | ATP6V1E1  | 22 | 17592136  | 17628818  | protein_coding | 20,55 | 0 |
| ENSG00000176597 | B3GNT5    | 3  | 183253244 | 183298504 | protein_coding | 20,54 | 0 |
| ENSG00000122678 | POLM      | 7  | 44072247  | 44082540  | protein_coding | 20,53 | 0 |
| ENSG00000132680 | KIAA0907  | 1  | 155913043 | 155934400 | protein_coding | 20,53 | 0 |
| ENSG00000149328 | GLB1L2    | 11 | 134331874 | 134378341 | protein_coding | 20,51 | 0 |
| ENSG00000177888 | ZBTB41    | 1  | 197153680 | 197200542 | protein_coding | 20,50 | 0 |
| ENSG00000150768 | DLAT      | 11 | 112024814 | 112064390 | protein_coding | 20,44 | 0 |
| ENSG00000196110 | ZNF699    | 19 | 9294275   | 9309838   | protein_coding | 20,40 | 0 |
| ENSG00000175857 | GAPT      | 5  | 58491435  | 58497090  | protein_coding | 20,40 | 0 |
| ENSG00000114378 | HYAL1     | 3  | 50299889  | 50312381  | protein_coding | 20,40 | 0 |
| ENSG00000163933 | RFT1      | 3  | 53088483  | 53130462  | protein_coding | 20,38 | 0 |
| ENSG00000124116 | WFDC3     | 20 | 45747944  | 45791932  | protein_coding | 20,36 | 0 |
| ENSG00000172992 | DCAKD     | 17 | 45023340  | 45061109  | protein_coding | 20,36 | 0 |
| ENSG00000100938 | GMPR2     | 14 | 24232422  | 24239242  | protein_coding | 20,35 | 0 |
| ENSG00000104872 | PIH1D1    | 19 | 49446298  | 49453497  | protein_coding | 20,34 | 0 |
| ENSG00000065150 | IPO5      | 13 | 97953658  | 98024297  | protein_coding | 20,34 | 0 |
| ENSG00000134986 | NREP      | 5  | 111662621 | 111997464 | protein_coding | 20,33 | 0 |
| ENSG00000167863 | ATP5H     | 17 | 75038863  | 75046985  | protein_coding | 20,33 | 0 |
| ENSG00000136603 | SKIL      | 3  | 170357678 | 170396835 | protein_coding | 20,32 | 0 |
| ENSG00000183048 | SLC25A10  | 17 | 81712236  | 81721016  | protein_coding | 20,30 | 0 |
| ENSG00000181038 | METTL23   | 17 | 76726830  | 76733936  | protein_coding | 20,29 | 0 |
| ENSG00000181827 | RFX7      | 15 | 56087280  | 56243266  | protein_coding | 20,29 | 0 |
| ENSG00000155229 | MMS19     | 10 | 97458324  | 97498794  | protein_coding | 20,28 | 0 |
| ENSG00000185090 | MANEAL    | 1  | 37793802  | 37801137  | protein_coding | 20,28 | 0 |
| ENSG00000078114 | NEBL      | 10 | 20779973  | 21174187  | protein_coding | 20,28 | 0 |
| ENSG00000166575 | TMEM135   | 11 | 87037844  | 87323758  | protein_coding | 20,25 | 0 |

|                 |         |    |           |           |                |       |   |
|-----------------|---------|----|-----------|-----------|----------------|-------|---|
| ENSG00000178694 | NSUN3   | 3  | 94062916  | 94128545  | protein_coding | 20,24 | 0 |
| ENSG00000187189 | TSPYL4  | 6  | 116249961 | 116254140 | protein_coding | 20,23 | 0 |
| ENSG00000129245 | FXR2    | 17 | 7591230   | 7614871   | protein_coding | 20,22 | 0 |
| ENSG00000204397 | CARD16  | 11 | 105041326 | 105101431 | protein_coding | 20,20 | 0 |
| ENSG00000121797 | CCRL2   | 3  | 46407163  | 46412997  | protein_coding | 20,20 | 0 |
| ENSG00000168591 | TMUB2   | 17 | 44186970  | 44191731  | protein_coding | 20,19 | 0 |
| ENSG00000171793 | CTPS1   | 1  | 40979335  | 41012565  | protein_coding | 20,19 | 0 |
| ENSG00000166801 | FAM111A | 11 | 59142748  | 59155039  | protein_coding | 20,18 | 0 |
| ENSG00000179295 | PTPN11  | 12 | 112418351 | 112509913 | protein_coding | 20,17 | 0 |
| ENSG00000103507 | BCKDK   | 16 | 31106107  | 31112791  | protein_coding | 20,16 | 0 |
| ENSG00000184110 | EIF3C   | 16 | 28688558  | 28735730  | protein_coding | 20,15 | 0 |
| ENSG00000131507 | NDFIP1  | 5  | 142108505 | 142154443 | protein_coding | 20,15 | 0 |
| ENSG00000138074 | SLC5A6  | 2  | 27199587  | 27212958  | protein_coding | 20,13 | 0 |
| ENSG00000151502 | VPS26B  | 11 | 134224645 | 134247792 | protein_coding | 20,12 | 0 |
| ENSG00000260230 | FRRS1L  | 9  | 109130293 | 109167291 | protein_coding | 20,11 | 0 |
| ENSG00000205339 | IPO7    | 11 | 9384622   | 9448126   | protein_coding | 20,10 | 0 |
| ENSG00000132000 | PODNL1  | 19 | 13931187  | 13953392  | protein_coding | 20,10 | 0 |
| ENSG00000165071 | TMEM71  | 8  | 132685007 | 132760712 | protein_coding | 20,10 | 0 |
| ENSG00000173705 | SUSD5   | 3  | 33150042  | 33219215  | protein_coding | 20,09 | 0 |
| ENSG00000146070 | PLA2G7  | 6  | 46704201  | 46735693  | protein_coding | 20,07 | 0 |
| ENSG00000112773 | FAM46A  | 6  | 81491439  | 81752774  | protein_coding | 20,07 | 0 |
| ENSG00000120725 | SIL1    | 5  | 138946720 | 139293557 | protein_coding | 20,06 | 0 |
| ENSG00000166685 | COG1    | 17 | 73192632  | 73208507  | protein_coding | 20,05 | 0 |
| ENSG00000131791 | PRKAB2  | 1  | 147155106 | 147172550 | protein_coding | 20,05 | 0 |
| ENSG00000143753 | DEGS1   | 1  | 224175756 | 224193441 | protein_coding | 20,04 | 0 |
| ENSG00000129480 | DTD2    | 14 | 31446036  | 31457510  | protein_coding | 20,04 | 0 |
| ENSG00000173273 | TNKS    | 8  | 9555914   | 9782346   | protein_coding | 20,03 | 0 |
| ENSG00000179387 | ELMOD2  | 4  | 140524158 | 140553770 | protein_coding | 20,01 | 0 |
| ENSG00000106635 | BCL7B   | 7  | 73536356  | 73558002  | protein_coding | 20,00 | 0 |
| ENSG00000139410 | SDSL    | 12 | 113422237 | 113438276 | protein_coding | 20,00 | 0 |
| ENSG00000178295 | GEN1    | 2  | 17753858  | 17788941  | protein_coding | 20,00 | 0 |
| ENSG00000155660 | PDIA4   | 7  | 149003062 | 149028641 | protein_coding | 19,98 | 0 |
| ENSG00000198642 | KLHL9   | 9  | 21329671  | 21335380  | protein_coding | 19,98 | 0 |
| ENSG00000148450 | MSRB2   | 10 | 23095506  | 23122013  | protein_coding | 19,95 | 0 |
| ENSG00000177463 | NR2C2   | 3  | 14947584  | 15053600  | protein_coding | 19,94 | 0 |
| ENSG00000150630 | VEGFC   | 4  | 176683538 | 176792727 | protein_coding | 19,94 | 0 |
| ENSG00000063761 | ADCK1   | 14 | 77800083  | 77935012  | protein_coding | 19,92 | 0 |
| ENSG00000120158 | RCL1    | 9  | 4792869   | 4885917   | protein_coding | 19,91 | 0 |
| ENSG00000230510 | PPP5D1  | 19 | 46480796  | 46601200  | protein_coding | 19,90 | 0 |
| ENSG00000118242 | MREG    | 2  | 215942805 | 216034096 | protein_coding | 19,90 | 0 |
| ENSG00000155957 | TMBIM4  | 12 | 66135846  | 66170072  | protein_coding | 19,89 | 0 |
| ENSG00000213064 | SFT2D2  | 1  | 168225938 | 168253025 | protein_coding | 19,89 | 0 |
| ENSG00000158092 | NCK1    | 3  | 136862208 | 136949823 | protein_coding | 19,88 | 0 |
| ENSG00000239672 | NME1    | 17 | 51153536  | 51162428  | protein_coding | 19,88 | 0 |
| ENSG00000109586 | GALNT7  | 4  | 173168753 | 173323967 | protein_coding | 19,85 | 0 |
| ENSG00000139668 | WDFY2   | 13 | 51584455  | 51767707  | protein_coding | 19,84 | 0 |
| ENSG00000165072 | MAMDC2  | 9  | 70043581  | 70226970  | protein_coding | 19,83 | 0 |
| ENSG00000178425 | NT5DC1  | 6  | 116100849 | 116249497 | protein_coding | 19,82 | 0 |
| ENSG00000176531 | PHLDB3  | 19 | 43474954  | 43504935  | protein_coding | 19,80 | 0 |
| ENSG00000035115 | SH3YL1  | 2  | 217730    | 266398    | protein_coding | 19,80 | 0 |
| ENSG00000142751 | GPN2    | 1  | 26876133  | 26890297  | protein_coding | 19,80 | 0 |
| ENSG00000119396 | RAB14   | 9  | 121178137 | 121223014 | protein_coding | 19,78 | 0 |
| ENSG00000103018 | CY5B    | 16 | 69424525  | 69466266  | protein_coding | 19,78 | 0 |
| ENSG00000147123 | NDUFB11 | X  | 47142216  | 47145504  | protein_coding | 19,78 | 0 |
| ENSG00000170265 | ZNF282  | 7  | 149195485 | 149226248 | protein_coding | 19,76 | 0 |
| ENSG00000165502 | RPL36AL | 14 | 49618519  | 49620685  | protein_coding | 19,75 | 0 |
| ENSG00000104221 | BRF2    | 8  | 37843268  | 37849904  | protein_coding | 19,75 | 0 |
| ENSG00000142556 | ZNF614  | 19 | 52012765  | 52030240  | protein_coding | 19,74 | 0 |

|                 |            |    |           |           |                |       |   |
|-----------------|------------|----|-----------|-----------|----------------|-------|---|
| ENSG00000198739 | LRRTM3     | 10 | 66926006  | 67099830  | protein_coding | 19,73 | 0 |
| ENSG0000040633  | PHF23      | 17 | 7235028   | 7239722   | protein_coding | 19,72 | 0 |
| ENSG00000175745 | NR2F1      | 5  | 93583337  | 93594615  | protein_coding | 19,71 | 0 |
| ENSG00000179151 | EDC3       | 15 | 74630558  | 74696292  | protein_coding | 19,71 | 0 |
| ENSG00000174292 | TNK1       | 17 | 7380534   | 7389774   | protein_coding | 19,70 | 0 |
| ENSG00000248643 | RBM14-RBM  | 11 | 66616626  | 66646469  | protein_coding | 19,70 | 0 |
| ENSG00000188282 | RUFY4      | 2  | 218034960 | 218090581 | protein_coding | 19,70 | 0 |
| ENSG00000116819 | TFAP2E     | 1  | 35573370  | 35595328  | protein_coding | 19,70 | 0 |
| ENSG00000166377 | ATP9B      | 18 | 79069285  | 79378283  | protein_coding | 19,68 | 0 |
| ENSG00000124571 | XPO5       | 6  | 43522330  | 43576075  | protein_coding | 19,65 | 0 |
| ENSG00000113583 | C5orf15    | 5  | 133955502 | 133968787 | protein_coding | 19,65 | 0 |
| ENSG00000101004 | NINL       | 20 | 25452705  | 25585517  | protein_coding | 19,64 | 0 |
| ENSG00000188603 | CLN3       | 16 | 28477279  | 28495575  | protein_coding | 19,64 | 0 |
| ENSG00000158615 | PPP1R15B   | 1  | 204403387 | 204411791 | protein_coding | 19,62 | 0 |
| ENSG00000048828 | FAM120A    | 9  | 93451722  | 93566107  | protein_coding | 19,61 | 0 |
| ENSG00000169302 | STK32A     | 5  | 147234963 | 147387852 | protein_coding | 19,60 | 0 |
| ENSG00000179921 | GPBAR1     | 2  | 218259496 | 218263859 | protein_coding | 19,60 | 0 |
| ENSG00000014824 | SLC30A9    | 4  | 41990472  | 42090457  | protein_coding | 19,60 | 0 |
| ENSG00000170270 | C14orf142  | 14 | 93202894  | 93207094  | protein_coding | 19,59 | 0 |
| ENSG00000100395 | L3MBTL2    | 22 | 41205205  | 41231271  | protein_coding | 19,58 | 0 |
| ENSG00000090006 | LTBP4      | 19 | 40592883  | 40629818  | protein_coding | 19,57 | 0 |
| ENSG00000183111 | ARHGEF37   | 5  | 149551947 | 149634968 | protein_coding | 19,56 | 0 |
| ENSG00000138613 | APH1B      | 15 | 63276018  | 63309126  | protein_coding | 19,53 | 0 |
| ENSG00000198356 | ASNA1      | 19 | 12737139  | 12748323  | protein_coding | 19,53 | 0 |
| ENSG00000255508 | ENSG000002 | 11 | 62559603  | 62591531  | protein_coding | 19,52 | 0 |
| ENSG00000198677 | TTC37      | 5  | 95463895  | 95555007  | protein_coding | 19,51 | 0 |
| ENSG00000156873 | PHKG2      | 16 | 30748270  | 30761176  | protein_coding | 19,51 | 0 |
| ENSG00000185010 | F8         | X  | 154835788 | 155026940 | protein_coding | 19,51 | 0 |
| ENSG00000159251 | ACTC1      | 15 | 34788096  | 34796139  | protein_coding | 19,50 | 0 |
| ENSG00000102445 | KIAA0226L  | 13 | 46342000  | 46438190  | protein_coding | 19,50 | 0 |
| ENSG00000082497 | SERTAD4    | 1  | 210232799 | 210246631 | protein_coding | 19,50 | 0 |
| ENSG00000235098 | ANKRD65    | 1  | 1418420   | 1421769   | protein_coding | 19,50 | 0 |
| ENSG00000126062 | TMEM115    | 3  | 50354749  | 50359610  | protein_coding | 19,49 | 0 |
| ENSG00000168101 | NUDT16L1   | 16 | 4693694   | 4695859   | protein_coding | 19,47 | 0 |
| ENSG00000169371 | SNUPN      | 15 | 75598083  | 75626469  | protein_coding | 19,47 | 0 |
| ENSG00000132670 | PTPRA      | 20 | 2864184   | 3039076   | protein_coding | 19,46 | 0 |
| ENSG00000198453 | ZNF568     | 19 | 36916329  | 36998700  | protein_coding | 19,45 | 0 |
| ENSG00000103274 | NUBP1      | 16 | 10743786  | 10769351  | protein_coding | 19,45 | 0 |
| ENSG00000163558 | PRKCI      | 3  | 170222365 | 170305981 | protein_coding | 19,42 | 0 |
| ENSG00000101846 | STS        | X  | 7219456   | 7354810   | protein_coding | 19,38 | 0 |
| ENSG00000144642 | RBMS3      | 3  | 29280982  | 30010391  | protein_coding | 19,38 | 0 |
| ENSG00000249459 | ZNF286B    | 17 | 18658429  | 18682262  | protein_coding | 19,37 | 0 |
| ENSG00000176244 | ACBD7      | 10 | 15077523  | 15088776  | protein_coding | 19,36 | 0 |
| ENSG00000128626 | MRPS12     | 19 | 38930548  | 38933162  | protein_coding | 19,36 | 0 |
| ENSG00000103549 | RNF40      | 16 | 30761745  | 30776307  | protein_coding | 19,36 | 0 |
| ENSG00000113971 | NPHP3      | 3  | 132680609 | 132722442 | protein_coding | 19,34 | 0 |
| ENSG00000187147 | RNF220     | 1  | 44405194  | 44651724  | protein_coding | 19,34 | 0 |
| ENSG00000185838 | GNB1L      | 22 | 19783224  | 19854939  | protein_coding | 19,33 | 0 |
| ENSG00000183044 | ABAT       | 16 | 8674565   | 8784575   | protein_coding | 19,33 | 0 |
| ENSG00000114948 | ADAM23     | 2  | 206443539 | 206621130 | protein_coding | 19,32 | 0 |
| ENSG00000204231 | RXRB       | 6  | 33193588  | 33200688  | protein_coding | 19,30 | 0 |
| ENSG00000123700 | KCNJ2      | 17 | 70168673  | 70180048  | protein_coding | 19,30 | 0 |
| ENSG00000074047 | GLI2       | 2  | 120735623 | 120992653 | protein_coding | 19,30 | 0 |
| ENSG00000180875 | GREM2      | 1  | 240489573 | 240612149 | protein_coding | 19,30 | 0 |
| ENSG00000215788 | TNFRSF25   | 1  | 6461151   | 6466195   | protein_coding | 19,30 | 0 |
| ENSG00000184381 | PLA2G6     | 22 | 38111495  | 38205690  | protein_coding | 19,29 | 0 |
| ENSG00000217128 | FNIP1      | 5  | 131641714 | 131797063 | protein_coding | 19,27 | 0 |
| ENSG00000107185 | RGP1       | 9  | 35749287  | 35758575  | protein_coding | 19,27 | 0 |

|                 |          |    |           |           |                |       |   |
|-----------------|----------|----|-----------|-----------|----------------|-------|---|
| ENSG00000127884 | ECHS1    | 10 | 133362480 | 133373689 | protein_coding | 19,25 | 0 |
| ENSG00000111203 | ITFG2    | 12 | 2812622   | 2859791   | protein_coding | 19,25 | 0 |
| ENSG00000198720 | ANKRD13B | 17 | 29589769  | 29614761  | protein_coding | 19,21 | 0 |
| ENSG00000102967 | DHODH    | 16 | 72008588  | 72027664  | protein_coding | 19,20 | 0 |
| ENSG00000181392 | SYNE4    | 19 | 36003307  | 36008793  | protein_coding | 19,20 | 0 |
| ENSG00000197016 | ZNF470   | 19 | 56567511  | 56588911  | protein_coding | 19,19 | 0 |
| ENSG00000111752 | PHC1     | 12 | 8913896   | 8941467   | protein_coding | 19,19 | 0 |
| ENSG00000103415 | HMOX2    | 16 | 4474690   | 4510347   | protein_coding | 19,17 | 0 |
| ENSG00000160570 | DEDD2    | 19 | 42198598  | 42220140  | protein_coding | 19,17 | 0 |
| ENSG00000213865 | C8orf44  | 8  | 66667615  | 66685564  | protein_coding | 19,17 | 0 |
| ENSG00000273136 | NBPF26   | 1  | 120805418 | 120841481 | protein_coding | 19,17 | 0 |
| ENSG00000047315 | POLR2B   | 4  | 56977722  | 57031168  | protein_coding | 19,16 | 0 |
| ENSG00000109667 | SLC2A9   | 4  | 9771153   | 10054936  | protein_coding | 19,15 | 0 |
| ENSG00000166278 | C2       | 6  | 31897785  | 31945672  | protein_coding | 19,13 | 0 |
| ENSG00000263001 | GTF2I    | 7  | 74657667  | 74760692  | protein_coding | 19,13 | 0 |
| ENSG00000127324 | TSPAN8   | 12 | 71125085  | 71441898  | protein_coding | 19,10 | 0 |
| ENSG00000166024 | R3HCC1L  | 10 | 98134624  | 98244897  | protein_coding | 19,08 | 0 |
| ENSG00000107872 | FBXL15   | 10 | 102419189 | 102423136 | protein_coding | 19,07 | 0 |
| ENSG00000175215 | CTDSP2   | 12 | 57819927  | 57846739  | protein_coding | 19,07 | 0 |
| ENSG00000161914 | ZNF653   | 19 | 11483427  | 11505923  | protein_coding | 19,06 | 0 |
| ENSG00000155792 | DEPTOR   | 8  | 119873717 | 120050913 | protein_coding | 19,05 | 0 |
| ENSG00000010295 | IFFO1    | 12 | 6538375   | 6556083   | protein_coding | 19,04 | 0 |
| ENSG00000068745 | IP6K2    | 3  | 48688003  | 48740353  | protein_coding | 19,00 | 0 |
| ENSG00000273820 | USP27X   | X  | 49879948  | 49882565  | protein_coding | 18,98 | 0 |
| ENSG00000084623 | EIF3I    | 1  | 32221928  | 32231604  | protein_coding | 18,98 | 0 |
| ENSG00000125648 | SLC25A23 | 19 | 6436079   | 6465203   | protein_coding | 18,97 | 0 |
| ENSG00000148848 | ADAM12   | 10 | 126012381 | 126388455 | protein_coding | 18,97 | 0 |
| ENSG00000079819 | EPB41L2  | 6  | 130839347 | 131063322 | protein_coding | 18,96 | 0 |
| ENSG00000164620 | RELL2    | 5  | 141636950 | 141641077 | protein_coding | 18,96 | 0 |
| ENSG00000079482 | OPHN1    | X  | 68042344  | 68433913  | protein_coding | 18,94 | 0 |
| ENSG00000135517 | MIP      | 12 | 56449502  | 56469166  | protein_coding | 18,94 | 0 |
| ENSG00000170348 | TMED10   | 14 | 75131470  | 75176631  | protein_coding | 18,94 | 0 |
| ENSG00000186792 | HYAL3    | 3  | 50292831  | 50299468  | protein_coding | 18,92 | 0 |
| ENSG00000115216 | NRBP1    | 2  | 27427790  | 27442259  | protein_coding | 18,92 | 0 |
| ENSG00000167978 | SRRM2    | 16 | 2752329   | 2772538   | protein_coding | 18,91 | 0 |
| ENSG00000136098 | NEK3     | 13 | 52132639  | 52159861  | protein_coding | 18,91 | 0 |
| ENSG00000144118 | RALB     | 2  | 120240064 | 120294713 | protein_coding | 18,91 | 0 |
| ENSG00000104957 | CCDC130  | 19 | 13731760  | 13763296  | protein_coding | 18,90 | 0 |
| ENSG00000204138 | PHACTR4  | 1  | 28369582  | 28500369  | protein_coding | 18,89 | 0 |
| ENSG00000149557 | FEZ1     | 11 | 125445745 | 125496317 | protein_coding | 18,88 | 0 |
| ENSG00000165475 | CRYL1    | 13 | 20403667  | 20525857  | protein_coding | 18,87 | 0 |
| ENSG00000188878 | FBF1     | 17 | 75909574  | 75941140  | protein_coding | 18,85 | 0 |
| ENSG00000078804 | TP53INP2 | 20 | 34704290  | 34713439  | protein_coding | 18,84 | 0 |
| ENSG00000132376 | INPP5K   | 17 | 1494571   | 1516888   | protein_coding | 18,84 | 0 |
| ENSG00000197702 | PARVA    | 11 | 12377185  | 12530801  | protein_coding | 18,84 | 0 |
| ENSG00000086159 | AQP6     | 12 | 49967194  | 49977139  | protein_coding | 18,80 | 0 |
| ENSG00000253537 | PCDHGA7  | 5  | 141382739 | 141512979 | protein_coding | 18,80 | 0 |
| ENSG00000188981 | MSANTD1  | 4  | 3244369   | 3271738   | protein_coding | 18,80 | 0 |
| ENSG00000096080 | MRPS18A  | 6  | 43671303  | 43687791  | protein_coding | 18,80 | 0 |
| ENSG00000100650 | SRSF5    | 14 | 69726900  | 69772005  | protein_coding | 18,79 | 0 |
| ENSG00000170909 | OSCAR    | 19 | 54094668  | 54102692  | protein_coding | 18,77 | 0 |
| ENSG00000082701 | GSK3B    | 3  | 119821323 | 120094417 | protein_coding | 18,77 | 0 |
| ENSG00000112339 | HBS1L    | 6  | 134960378 | 135103056 | protein_coding | 18,75 | 0 |
| ENSG00000130741 | EIF2S3   | X  | 24054716  | 24077971  | protein_coding | 18,72 | 0 |
| ENSG00000132334 | PTPRE    | 10 | 127907061 | 128085855 | protein_coding | 18,72 | 0 |
| ENSG00000113161 | HMGCR    | 5  | 75336329  | 75362104  | protein_coding | 18,72 | 0 |
| ENSG00000155744 | FAM126B  | 2  | 200973718 | 201071671 | protein_coding | 18,71 | 0 |
| ENSG00000129055 | ANAPC13  | 3  | 134477706 | 134486716 | protein_coding | 18,71 | 0 |

|                 |                 |    |           |           |                |       |   |
|-----------------|-----------------|----|-----------|-----------|----------------|-------|---|
| ENSG00000276070 | CCL4L2          | 17 | 36210924  | 36212878  | protein_coding | 18,70 | 0 |
| ENSG00000279765 | ENSG00000279765 | 15 | 92883413  | 92949230  | protein_coding | 18,70 | 0 |
| ENSG00000173421 | CCDC36          | 3  | 49198428  | 49258104  | protein_coding | 18,70 | 0 |
| ENSG00000132254 | ARFIP2          | 11 | 6474683   | 6481479   | protein_coding | 18,70 | 0 |
| ENSG00000141098 | GFOD2           | 16 | 67674531  | 67719421  | protein_coding | 18,70 | 0 |
| ENSG00000122085 | MTERF4          | 2  | 241072169 | 241102332 | protein_coding | 18,69 | 0 |
| ENSG00000080603 | SRCAP           | 16 | 30698209  | 30741409  | protein_coding | 18,67 | 0 |
| ENSG00000129219 | PLD2            | 17 | 4807096   | 4823434   | protein_coding | 18,65 | 0 |
| ENSG00000132330 | SCLY            | 2  | 238060889 | 238099413 | protein_coding | 18,65 | 0 |
| ENSG00000197467 | COL13A1         | 10 | 69801931  | 69964275  | protein_coding | 18,64 | 0 |
| ENSG00000112208 | BAG2            | 6  | 57172326  | 57189833  | protein_coding | 18,63 | 0 |
| ENSG00000126970 | ZC4H2           | X  | 64915802  | 65034713  | protein_coding | 18,62 | 0 |
| ENSG00000130755 | GMFG            | 19 | 39328353  | 39342372  | protein_coding | 18,60 | 0 |
| ENSG00000026751 | SLAMF7          | 1  | 160739057 | 160754821 | protein_coding | 18,60 | 0 |
| ENSG00000188186 | LAMTOR4         | 7  | 100148907 | 100155944 | protein_coding | 18,58 | 0 |
| ENSG00000117395 | EBNA1BP2        | 1  | 43164175  | 43270936  | protein_coding | 18,56 | 0 |
| ENSG00000108953 | YWHAE           | 17 | 1344272   | 1400378   | protein_coding | 18,56 | 0 |
| ENSG00000254995 | STX16-NPEP      | 20 | 58651434  | 58715410  | protein_coding | 18,55 | 0 |
| ENSG00000119650 | IFT43           | 14 | 75902136  | 76084585  | protein_coding | 18,55 | 0 |
| ENSG00000129946 | SHC2            | 19 | 416583    | 460996    | protein_coding | 18,54 | 0 |
| ENSG00000198870 | STKLD1          | 9  | 133376367 | 133406096 | protein_coding | 18,54 | 0 |
| ENSG00000160062 | ZBTB8A          | 1  | 32539427  | 32605939  | protein_coding | 18,53 | 0 |
| ENSG00000168016 | TRANK1          | 3  | 36826820  | 36945057  | protein_coding | 18,51 | 0 |
| ENSG00000077312 | SNRPA           | 19 | 40750637  | 40765389  | protein_coding | 18,50 | 0 |
| ENSG00000204482 | LST1            | 6  | 31586124  | 31588909  | protein_coding | 18,50 | 0 |
| ENSG00000240038 | AMY2B           | 1  | 103553815 | 103579534 | protein_coding | 18,50 | 0 |
| ENSG00000234127 | TRIM26          | 6  | 30184455  | 30213427  | protein_coding | 18,48 | 0 |
| ENSG00000147475 | ERLIN2          | 8  | 37736599  | 37759101  | protein_coding | 18,48 | 0 |
| ENSG00000116990 | MYCL            | 1  | 39895426  | 39902256  | protein_coding | 18,47 | 0 |
| ENSG00000170088 | TMEM192         | 4  | 165070608 | 165208549 | protein_coding | 18,46 | 0 |
| ENSG00000140474 | ULK3            | 15 | 74836116  | 74843346  | protein_coding | 18,45 | 0 |
| ENSG00000124783 | SSR1            | 6  | 7268306   | 7347446   | protein_coding | 18,44 | 0 |
| ENSG00000040199 | PHLPP2          | 16 | 71637835  | 71724701  | protein_coding | 18,43 | 0 |
| ENSG00000125656 | CLPP            | 19 | 6361452   | 6368908   | protein_coding | 18,43 | 0 |
| ENSG00000087842 | PIR             | X  | 15384799  | 15493564  | protein_coding | 18,42 | 0 |
| ENSG00000133246 | PRAM1           | 19 | 8490056   | 8503112   | protein_coding | 18,42 | 0 |
| ENSG00000132952 | USPL1           | 13 | 30617693  | 30660770  | protein_coding | 18,42 | 0 |
| ENSG00000133067 | LGR6            | 1  | 202193901 | 202319781 | protein_coding | 18,41 | 0 |
| ENSG00000111229 | ARPC3           | 12 | 110434825 | 110450422 | protein_coding | 18,41 | 0 |
| ENSG00000074071 | MRPS34          | 16 | 1771890   | 1773155   | protein_coding | 18,40 | 0 |
| ENSG00000102001 | CACNA1F         | X  | 49205063  | 49233371  | protein_coding | 18,40 | 0 |
| ENSG00000082641 | NFE2L1          | 17 | 48048329  | 48061487  | protein_coding | 18,39 | 0 |
| ENSG00000160208 | RRP1B           | 21 | 43659548  | 43696079  | protein_coding | 18,39 | 0 |
| ENSG00000087903 | RFX2            | 19 | 5993164   | 6199572   | protein_coding | 18,38 | 0 |
| ENSG00000166326 | TRIM44          | 11 | 35662805  | 35818007  | protein_coding | 18,33 | 0 |
| ENSG00000105373 | GLTSCR2         | 19 | 47745522  | 47757058  | protein_coding | 18,32 | 0 |
| ENSG00000133315 | MACROD1         | 11 | 63998558  | 64166106  | protein_coding | 18,32 | 0 |
| ENSG00000178096 | BOLA1           | 1  | 149887890 | 149900798 | protein_coding | 18,29 | 0 |
| ENSG00000177646 | ACAD9           | 3  | 128879596 | 128916067 | protein_coding | 18,29 | 0 |
| ENSG00000132467 | UTP3            | 4  | 70688479  | 70690551  | protein_coding | 18,27 | 0 |
| ENSG00000141385 | AFG3L2          | 18 | 12328944  | 12377314  | protein_coding | 18,26 | 0 |
| ENSG00000185019 | UBOX5           | 20 | 3107573   | 3160196   | protein_coding | 18,25 | 0 |
| ENSG00000087053 | MTMR2           | 11 | 95832882  | 95925315  | protein_coding | 18,25 | 0 |
| ENSG00000159352 | PSMD4           | 1  | 151254703 | 151267479 | protein_coding | 18,24 | 0 |
| ENSG00000128641 | MYO1B           | 2  | 191245185 | 191425389 | protein_coding | 18,21 | 0 |
| ENSG00000180720 | CHRM4           | 11 | 46385098  | 46386608  | protein_coding | 18,20 | 0 |
| ENSG00000186603 | HPDL            | 1  | 45326905  | 45328533  | protein_coding | 18,20 | 0 |
| ENSG00000163053 | SLC16A14        | 2  | 230034974 | 230068999 | protein_coding | 18,19 | 0 |



|                 |                 |    |           |           |                |       |   |
|-----------------|-----------------|----|-----------|-----------|----------------|-------|---|
| ENSG00000156030 | ELMSAN1         | 14 | 73715122  | 73790285  | protein_coding | 18,15 | 0 |
| ENSG00000119599 | DCAF4           | 14 | 72926332  | 72959703  | protein_coding | 18,15 | 0 |
| ENSG00000168938 | PPIC            | 5  | 123023250 | 123036741 | protein_coding | 18,14 | 0 |
| ENSG00000130714 | POMT1           | 9  | 131502902 | 131523806 | protein_coding | 18,13 | 0 |
| ENSG00000067836 | ROGDI           | 16 | 4796968   | 4802950   | protein_coding | 18,11 | 0 |
| ENSG00000110367 | DDX6            | 11 | 118747766 | 118791149 | protein_coding | 18,03 | 0 |
| ENSG00000214827 | MTCP1           | X  | 155061622 | 155147937 | protein_coding | 18,02 | 0 |
| ENSG00000058673 | ZC3H11A         | 1  | 203795654 | 203854124 | protein_coding | 18,00 | 0 |
| ENSG00000108932 | SLC16A6         | 17 | 68267026  | 68291267  | protein_coding | 18,00 | 0 |
| ENSG00000161653 | NAGS            | 17 | 44004546  | 44009063  | protein_coding | 18,00 | 0 |
| ENSG00000167157 | PRRX2           | 9  | 129665641 | 129722674 | protein_coding | 18,00 | 0 |
| ENSG00000182600 | C2orf82         | 2  | 232857270 | 232878708 | protein_coding | 18,00 | 0 |
| ENSG00000143575 | HAX1            | 1  | 154272511 | 154275875 | protein_coding | 17,99 | 0 |
| ENSG00000104731 | KLHDC4          | 16 | 87696485  | 87765992  | protein_coding | 17,98 | 0 |
| ENSG00000159256 | MORC3           | 21 | 36320189  | 36386148  | protein_coding | 17,98 | 0 |
| ENSG00000175048 | ZDHHC14         | 6  | 157381133 | 157678146 | protein_coding | 17,98 | 0 |
| ENSG00000140650 | PMM2            | 16 | 8788823   | 8849331   | protein_coding | 17,98 | 0 |
| ENSG00000182149 | IST1            | 16 | 71845996  | 71931199  | protein_coding | 17,97 | 0 |
| ENSG00000140406 | MESDC1          | 15 | 81000944  | 81005788  | protein_coding | 17,97 | 0 |
| ENSG00000110844 | PRPF40B         | 12 | 49568218  | 49644666  | protein_coding | 17,96 | 0 |
| ENSG00000046604 | DSG2            | 18 | 31498043  | 31549008  | protein_coding | 17,95 | 0 |
| ENSG00000131037 | EPS8L1          | 19 | 55072020  | 55087923  | protein_coding | 17,95 | 0 |
| ENSG00000135597 | REPS1           | 6  | 138903493 | 138988261 | protein_coding | 17,95 | 0 |
| ENSG00000151746 | BICD1           | 12 | 32106835  | 32383633  | protein_coding | 17,94 | 0 |
| ENSG00000182220 | ATP6AP2         | X  | 40580908  | 40606637  | protein_coding | 17,94 | 0 |
| ENSG00000125485 | DDX31           | 9  | 132592997 | 132670401 | protein_coding | 17,93 | 0 |
| ENSG00000183718 | TRIM52          | 5  | 181254417 | 181261139 | protein_coding | 17,92 | 0 |
| ENSG00000055070 | SZRD1           | 1  | 16352575  | 16398145  | protein_coding | 17,92 | 0 |
| ENSG00000135905 | DOCK10          | 2  | 224765090 | 225042445 | protein_coding | 17,91 | 0 |
| ENSG00000172508 | CARNS1          | 11 | 67414968  | 67425607  | protein_coding | 17,91 | 0 |
| ENSG00000243943 | ZNF512          | 2  | 27582969  | 27623215  | protein_coding | 17,91 | 0 |
| ENSG00000011198 | ABHD5           | 3  | 43690113  | 43734371  | protein_coding | 17,91 | 0 |
| ENSG00000266074 | BAHCC1          | 17 | 81395475  | 81466332  | protein_coding | 17,91 | 0 |
| ENSG00000163328 | GPR155          | 2  | 174431571 | 174487094 | protein_coding | 17,90 | 0 |
| ENSG00000138772 | ANXA3           | 4  | 78551519  | 78610451  | protein_coding | 17,90 | 0 |
| ENSG00000213672 | NCKIPSD         | 3  | 48673844  | 48686364  | protein_coding | 17,89 | 0 |
| ENSG00000165861 | ZFYVE1          | 14 | 72969451  | 73027212  | protein_coding | 17,87 | 0 |
| ENSG00000140577 | CRTC3           | 15 | 90529925  | 90645345  | protein_coding | 17,86 | 0 |
| ENSG00000178028 | DMAP1           | 1  | 44213455  | 44220681  | protein_coding | 17,81 | 0 |
| ENSG00000177169 | ULK1            | 12 | 131894651 | 131923167 | protein_coding | 17,81 | 0 |
| ENSG00000068654 | POLR1A          | 2  | 86020216  | 86106155  | protein_coding | 17,80 | 0 |
| ENSG00000267216 | ENSG00000267216 | 19 | 58278966  | 58315197  | protein_coding | 17,80 | 0 |
| ENSG00000171757 | LRRC34          | 3  | 169793428 | 169812986 | protein_coding | 17,80 | 0 |
| ENSG00000243696 | ENSG00000243696 | 3  | 52813282  | 52835729  | protein_coding | 17,80 | 0 |
| ENSG00000022277 | RTFDC1          | 20 | 56468585  | 56519449  | protein_coding | 17,80 | 0 |
| ENSG00000087087 | SRRT            | 7  | 100875111 | 100888664 | protein_coding | 17,79 | 0 |
| ENSG00000104472 | CHRAC1          | 8  | 140511298 | 140517137 | protein_coding | 17,78 | 0 |
| ENSG00000178567 | EPM2AIP1        | 3  | 36985043  | 36993168  | protein_coding | 17,77 | 0 |
| ENSG00000198690 | FAN1            | 15 | 30903852  | 30943108  | protein_coding | 17,76 | 0 |
| ENSG00000110492 | MDK             | 11 | 46380756  | 46383837  | protein_coding | 17,75 | 0 |
| ENSG00000001084 | GCLC            | 6  | 53497341  | 53616970  | protein_coding | 17,75 | 0 |
| ENSG00000107937 | GTPBP4          | 10 | 988019    | 1019936   | protein_coding | 17,74 | 0 |
| ENSG00000150403 | TMCO3           | 13 | 113490995 | 113554590 | protein_coding | 17,73 | 0 |
| ENSG00000103023 | PRSS54          | 16 | 58279997  | 58295047  | protein_coding | 17,73 | 0 |
| ENSG00000143315 | PIGM            | 1  | 160027673 | 160031991 | protein_coding | 17,72 | 0 |
| ENSG00000005844 | ITGAL           | 16 | 30472658  | 30523185  | protein_coding | 17,70 | 0 |
| ENSG00000179071 | CCDC89          | 11 | 85684866  | 85686277  | protein_coding | 17,70 | 0 |
| ENSG00000214562 | NUTM2D          | 10 | 87357668  | 87370695  | protein_coding | 17,70 | 0 |

|                 |           |    |           |           |                |       |   |
|-----------------|-----------|----|-----------|-----------|----------------|-------|---|
| ENSG00000122733 | PHF24     | 9  | 34957608  | 34982544  | protein_coding | 17,70 | 0 |
| ENSG00000178038 | ALS2CL    | 3  | 46668997  | 46693704  | protein_coding | 17,70 | 0 |
| ENSG00000107282 | APBA1     | 9  | 69427530  | 69672306  | protein_coding | 17,70 | 0 |
| ENSG00000119844 | AFTPH     | 2  | 64524305  | 64593005  | protein_coding | 17,69 | 0 |
| ENSG00000155962 | CLIC2     | X  | 155276211 | 155334657 | protein_coding | 17,69 | 0 |
| ENSG00000133794 | ARNTL     | 11 | 13276652  | 13387266  | protein_coding | 17,69 | 0 |
| ENSG00000150764 | DIXDC1    | 11 | 111927144 | 112022584 | protein_coding | 17,69 | 0 |
| ENSG00000114279 | FGF12     | 3  | 192139395 | 192767764 | protein_coding | 17,68 | 0 |
| ENSG00000198556 | ZNF789    | 7  | 99472841  | 99503650  | protein_coding | 17,68 | 0 |
| ENSG00000132846 | ZBED3     | 5  | 77072072  | 77087323  | protein_coding | 17,66 | 0 |
| ENSG00000005882 | PKD2      | 17 | 50094737  | 50112152  | protein_coding | 17,66 | 0 |
| ENSG00000167371 | PRRT2     | 16 | 29811382  | 29815892  | protein_coding | 17,64 | 0 |
| ENSG00000175548 | ALG10B    | 12 | 38316578  | 38329728  | protein_coding | 17,64 | 0 |
| ENSG00000083720 | OXCT1     | 5  | 41730065  | 41870519  | protein_coding | 17,61 | 0 |
| ENSG00000108798 | ABI3      | 17 | 49210227  | 49223225  | protein_coding | 17,60 | 0 |
| ENSG00000176125 | UFSP1     | 7  | 100888723 | 100889718 | protein_coding | 17,60 | 0 |
| ENSG00000142677 | IL22RA1   | 1  | 24119771  | 24143121  | protein_coding | 17,60 | 0 |
| ENSG00000175820 | CCDC168   | 13 | 102729369 | 102759070 | protein_coding | 17,58 | 0 |
| ENSG00000103363 | TCEB2     | 16 | 2771414   | 2777297   | protein_coding | 17,58 | 0 |
| ENSG00000141480 | ARRB2     | 17 | 4710489   | 4721499   | protein_coding | 17,56 | 0 |
| ENSG00000121579 | NAA50     | 3  | 113716460 | 113746300 | protein_coding | 17,55 | 0 |
| ENSG00000139182 | CLSTN3    | 12 | 7129698   | 7158945   | protein_coding | 17,55 | 0 |
| ENSG00000176946 | THAP4     | 2  | 241584405 | 241637449 | protein_coding | 17,54 | 0 |
| ENSG00000138468 | SENP7     | 3  | 101324205 | 101513241 | protein_coding | 17,54 | 0 |
| ENSG00000140443 | IGF1R     | 15 | 98648971  | 98964530  | protein_coding | 17,52 | 0 |
| ENSG00000132286 | TIMM10B   | 11 | 6481447   | 6484679   | protein_coding | 17,52 | 0 |
| ENSG00000115457 | IGFBP2    | 2  | 216632828 | 216664436 | protein_coding | 17,50 | 0 |
| ENSG00000179083 | FAM133A   | X  | 93674013  | 93712274  | protein_coding | 17,50 | 0 |
| ENSG00000126432 | PRDX5     | 11 | 64318088  | 64321811  | protein_coding | 17,49 | 0 |
| ENSG00000172915 | NBEA      | 13 | 34942287  | 35673022  | protein_coding | 17,49 | 0 |
| ENSG00000198951 | NAGA      | 22 | 42058354  | 42070842  | protein_coding | 17,48 | 0 |
| ENSG00000146540 | C7orf50   | 7  | 996986    | 1138260   | protein_coding | 17,47 | 0 |
| ENSG00000106608 | URGCP     | 7  | 43875894  | 43926411  | protein_coding | 17,46 | 0 |
| ENSG00000173137 | ADCK5     | 8  | 144373101 | 144393242 | protein_coding | 17,45 | 0 |
| ENSG00000108799 | EZH1      | 17 | 42700275  | 42745049  | protein_coding | 17,45 | 0 |
| ENSG00000085563 | ABCB1     | 7  | 87503633  | 87713323  | protein_coding | 17,45 | 0 |
| ENSG00000170445 | HARS      | 5  | 140673173 | 140692024 | protein_coding | 17,43 | 0 |
| ENSG00000167264 | DUS2      | 16 | 67987746  | 68079320  | protein_coding | 17,42 | 0 |
| ENSG00000234616 | JRK       | 8  | 142657460 | 142681968 | protein_coding | 17,41 | 0 |
| ENSG00000107099 | DOCK8     | 9  | 214854    | 465259    | protein_coding | 17,41 | 0 |
| ENSG00000187535 | IFT140    | 16 | 1510427   | 1612110   | protein_coding | 17,40 | 0 |
| ENSG00000168421 | RHOH      | 4  | 40191053  | 40246967  | protein_coding | 17,40 | 0 |
| ENSG00000133943 | C14orf159 | 14 | 91060333  | 91225632  | protein_coding | 17,40 | 0 |
| ENSG00000172594 | SMPDL3A   | 6  | 122789049 | 122809720 | protein_coding | 17,39 | 0 |
| ENSG00000124249 | KCNK15    | 20 | 44745780  | 44752313  | protein_coding | 17,39 | 0 |
| ENSG00000166986 | MARS      | 12 | 57475445  | 57517569  | protein_coding | 17,39 | 0 |
| ENSG00000101400 | SNTA1     | 20 | 33407955  | 33443892  | protein_coding | 17,37 | 0 |
| ENSG00000182208 | MOB2      | 11 | 1469457   | 1501247   | protein_coding | 17,36 | 0 |
| ENSG00000179057 | IGSF22    | 11 | 18704305  | 18726230  | protein_coding | 17,36 | 0 |
| ENSG00000204410 | MSH5      | 6  | 31739948  | 31762834  | protein_coding | 17,36 | 0 |
| ENSG00000120137 | PANK3     | 5  | 168548495 | 168579600 | protein_coding | 17,34 | 0 |
| ENSG00000184220 | CMSS1     | 3  | 99817834  | 100178603 | protein_coding | 17,33 | 0 |
| ENSG00000099904 | ZDHHC8    | 22 | 20129456  | 20148007  | protein_coding | 17,33 | 0 |
| ENSG00000005469 | CROT      | 7  | 87345681  | 87399795  | protein_coding | 17,32 | 0 |
| ENSG00000152601 | MBNL1     | 3  | 152243828 | 152465780 | protein_coding | 17,32 | 0 |
| ENSG00000240230 | COX19     | 7  | 898778    | 975599    | protein_coding | 17,32 | 0 |
| ENSG00000173141 | MRPL57    | 13 | 21176645  | 21179084  | protein_coding | 17,29 | 0 |
| ENSG00000241553 | ARPC4     | 3  | 9792495   | 9807726   | protein_coding | 17,28 | 0 |

|                 |           |    |           |           |                |       |   |
|-----------------|-----------|----|-----------|-----------|----------------|-------|---|
| ENSG00000213015 | ZNF580    | 19 | 55635016  | 55643469  | protein_coding | 17,27 | 0 |
| ENSG00000165028 | NIPSNAP3B | 9  | 104764157 | 104777457 | protein_coding | 17,25 | 0 |
| ENSG00000145194 | ECE2      | 3  | 184249650 | 184293031 | protein_coding | 17,23 | 0 |
| ENSG00000157240 | FZD1      | 7  | 91264364  | 91271326  | protein_coding | 17,23 | 0 |
| ENSG00000162390 | ACOT11    | 1  | 54542257  | 54639192  | protein_coding | 17,23 | 0 |
| ENSG00000160321 | ZNF208    | 19 | 21932958  | 22010949  | protein_coding | 17,21 | 0 |
| ENSG00000204311 | DFNB59    | 2  | 178451436 | 178461390 | protein_coding | 17,21 | 0 |
| ENSG00000204396 | VWA7      | 6  | 31765590  | 31777294  | protein_coding | 17,20 | 0 |
| ENSG00000204956 | PCDHGA1   | 5  | 141330571 | 141512981 | protein_coding | 17,20 | 0 |
| ENSG00000077044 | DGKD      | 2  | 233354507 | 233472104 | protein_coding | 17,20 | 0 |
| ENSG00000168395 | ING5      | 2  | 241702035 | 241729478 | protein_coding | 17,18 | 0 |
| ENSG00000132471 | WBP2      | 17 | 75845699  | 75856507  | protein_coding | 17,18 | 0 |
| ENSG00000173039 | RELA      | 11 | 65653596  | 65663094  | protein_coding | 17,17 | 0 |
| ENSG00000146701 | MDH2      | 7  | 76048051  | 76067508  | protein_coding | 17,17 | 0 |
| ENSG00000160094 | ZNF362    | 1  | 33256545  | 33300719  | protein_coding | 17,14 | 0 |
| ENSG00000125650 | PSPN      | 19 | 6375148   | 6379058   | protein_coding | 17,13 | 0 |
| ENSG00000106400 | ZNHIT1    | 7  | 101217668 | 101224190 | protein_coding | 17,12 | 0 |
| ENSG00000185163 | DDX51     | 12 | 132136594 | 132144335 | protein_coding | 17,11 | 0 |
| ENSG00000176142 | TMEM39A   | 3  | 119429500 | 119468830 | protein_coding | 17,11 | 0 |
| ENSG00000267680 | ZNF224    | 19 | 44094339  | 44109886  | protein_coding | 17,11 | 0 |
| ENSG00000258429 | PDF       | 16 | 69328621  | 69330595  | protein_coding | 17,11 | 0 |
| ENSG00000105270 | CLIP3     | 19 | 36014660  | 36033343  | protein_coding | 17,11 | 0 |
| ENSG00000075945 | KIFAP3    | 1  | 169921326 | 170085208 | protein_coding | 17,10 | 0 |
| ENSG00000100427 | MLC1      | 22 | 50059391  | 50085902  | protein_coding | 17,10 | 0 |
| ENSG00000068078 | FGFR3     | 4  | 1793307   | 1808872   | protein_coding | 17,10 | 0 |
| ENSG00000106688 | SLC1A1    | 9  | 4490444   | 4587469   | protein_coding | 17,09 | 0 |
| ENSG00000050438 | SLC4A8    | 12 | 51391317  | 51515763  | protein_coding | 17,09 | 0 |
| ENSG00000197381 | ADARB1    | 21 | 45073853  | 45226560  | protein_coding | 17,07 | 0 |
| ENSG00000100416 | TRMU      | 22 | 46330875  | 46357340  | protein_coding | 17,07 | 0 |
| ENSG00000110092 | CCND1     | 11 | 69641087  | 69654474  | protein_coding | 17,07 | 0 |
| ENSG00000174106 | LEMD3     | 12 | 65169571  | 65248327  | protein_coding | 17,06 | 0 |
| ENSG00000228474 | OST4      | 2  | 27070472  | 27071773  | protein_coding | 17,05 | 0 |
| ENSG00000253304 | TMEM200B  | 1  | 29119428  | 29123935  | protein_coding | 17,05 | 0 |
| ENSG00000075790 | BCAP29    | 7  | 107579977 | 107629170 | protein_coding | 17,05 | 0 |
| ENSG00000115211 | EIF2B4    | 2  | 27364352  | 27370486  | protein_coding | 17,02 | 0 |
| ENSG00000100626 | GALNT16   | 14 | 69259277  | 69357033  | protein_coding | 17,00 | 0 |
| ENSG00000184363 | PKP3      | 11 | 392614    | 404908    | protein_coding | 17,00 | 0 |
| ENSG00000179133 | C10orf67  | 10 | 23267195  | 23344845  | protein_coding | 17,00 | 0 |
| ENSG00000171388 | APLN      | X  | 129645259 | 129654937 | protein_coding | 17,00 | 0 |
| ENSG00000172270 | BSG       | 19 | 571277    | 583493    | protein_coding | 17,00 | 0 |
| ENSG00000122140 | MRPS2     | 9  | 135499984 | 135504673 | protein_coding | 16,99 | 0 |
| ENSG00000146731 | CCT6A     | 7  | 56051630  | 56063989  | protein_coding | 16,96 | 0 |
| ENSG00000230667 | SETSIP    | 1  | 92074533  | 92075441  | protein_coding | 16,94 | 0 |
| ENSG00000160058 | BSDC1     | 1  | 32365103  | 32394731  | protein_coding | 16,93 | 0 |
| ENSG00000058262 | SEC61A1   | 3  | 128051641 | 128071683 | protein_coding | 16,93 | 0 |
| ENSG00000169442 | CD52      | 1  | 26317957  | 26320523  | protein_coding | 16,92 | 0 |
| ENSG00000028528 | SNX1      | 15 | 64094123  | 64146090  | protein_coding | 16,91 | 0 |
| ENSG00000008294 | SPAG9     | 17 | 50962174  | 51120865  | protein_coding | 16,90 | 0 |
| ENSG00000130713 | EXOSC2    | 9  | 130693721 | 130704894 | protein_coding | 16,89 | 0 |
| ENSG00000175213 | ZNF408    | 11 | 46700818  | 46705912  | protein_coding | 16,88 | 0 |
| ENSG00000076826 | CAMSAP3   | 19 | 7595902   | 7618304   | protein_coding | 16,88 | 0 |
| ENSG00000151348 | EXT2      | 11 | 44095549  | 44245429  | protein_coding | 16,88 | 0 |
| ENSG00000176438 | SYNE3     | 14 | 95407266  | 95475836  | protein_coding | 16,88 | 0 |
| ENSG00000116809 | ZBTB17    | 1  | 15941869  | 15976132  | protein_coding | 16,88 | 0 |
| ENSG00000145908 | ZNF300    | 5  | 150894392 | 150904983 | protein_coding | 16,88 | 0 |
| ENSG00000152154 | TMEM178A  | 2  | 39664982  | 39717963  | protein_coding | 16,86 | 0 |
| ENSG00000100764 | PSMC1     | 14 | 90256495  | 90275429  | protein_coding | 16,85 | 0 |
| ENSG00000166963 | MAP1A     | 15 | 43510958  | 43531620  | protein_coding | 16,84 | 0 |

|                 |            |    |           |           |                |       |   |
|-----------------|------------|----|-----------|-----------|----------------|-------|---|
| ENSG0000078142  | PIK3C3     | 18 | 41955206  | 42087830  | protein_coding | 16,84 | 0 |
| ENSG00000160007 | ARHGAP35   | 19 | 46918676  | 47005077  | protein_coding | 16,82 | 0 |
| ENSG00000160783 | PMF1       | 1  | 156212993 | 156240042 | protein_coding | 16,81 | 0 |
| ENSG00000180340 | FZD2       | 17 | 44557459  | 44559570  | protein_coding | 16,80 | 0 |
| ENSG00000278882 | ENSG000002 | 1  | 120723923 | 120793877 | protein_coding | 16,80 | 0 |
| ENSG00000163349 | HIPK1      | 1  | 113929192 | 113977869 | protein_coding | 16,79 | 0 |
| ENSG00000224420 | ADM5       | 19 | 49688664  | 49690575  | protein_coding | 16,79 | 0 |
| ENSG00000134202 | GSTM3      | 1  | 109733932 | 109741038 | protein_coding | 16,76 | 0 |
| ENSG00000172667 | ZMAT3      | 3  | 179017223 | 179072279 | protein_coding | 16,75 | 0 |
| ENSG00000267127 | ENSG000002 | 18 | 80034346  | 80097088  | protein_coding | 16,75 | 0 |
| ENSG00000250312 | ZNF718     | 4  | 124480    | 163989    | protein_coding | 16,74 | 0 |
| ENSG00000138430 | OLA1       | 2  | 174072447 | 174248698 | protein_coding | 16,74 | 0 |
| ENSG00000112031 | MTRF1L     | 6  | 152987362 | 153002685 | protein_coding | 16,73 | 0 |
| ENSG00000196981 | WDR5B      | 3  | 122412332 | 122416051 | protein_coding | 16,73 | 0 |
| ENSG00000164983 | TMEM65     | 8  | 124306189 | 124372692 | protein_coding | 16,73 | 0 |
| ENSG00000206053 | HN1L       | 16 | 1678256   | 1702280   | protein_coding | 16,73 | 0 |
| ENSG00000135114 | OASL       | 12 | 121019111 | 121039242 | protein_coding | 16,70 | 0 |
| ENSG00000139626 | ITGB7      | 12 | 53191318  | 53207307  | protein_coding | 16,70 | 0 |
| ENSG00000138759 | FRAS1      | 4  | 78057570  | 78544269  | protein_coding | 16,70 | 0 |
| ENSG00000166707 | ZCCHC18    | X  | 104112131 | 104115846 | protein_coding | 16,70 | 0 |
| ENSG00000151553 | FAM160B1   | 10 | 114821744 | 114899832 | protein_coding | 16,70 | 0 |
| ENSG00000167461 | RAB8A      | 19 | 16111629  | 16134234  | protein_coding | 16,70 | 0 |
| ENSG00000177599 | ZNF491     | 19 | 11797667  | 11809622  | protein_coding | 16,69 | 0 |
| ENSG00000115091 | ACTR3      | 2  | 113889960 | 113962596 | protein_coding | 16,69 | 0 |
| ENSG00000112855 | HARS2      | 5  | 140691426 | 140699291 | protein_coding | 16,68 | 0 |
| ENSG00000204348 | DXO        | 6  | 31969810  | 31972292  | protein_coding | 16,67 | 0 |
| ENSG00000164305 | CASP3      | 4  | 184627696 | 184649509 | protein_coding | 16,67 | 0 |
| ENSG00000165118 | C9orf64    | 9  | 83938311  | 83956986  | protein_coding | 16,66 | 0 |
| ENSG00000188921 | HACD4      | 9  | 20999515  | 21031636  | protein_coding | 16,66 | 0 |
| ENSG00000168273 | SMIM4      | 3  | 52534013  | 52579237  | protein_coding | 16,64 | 0 |
| ENSG00000139405 | RITA1      | 12 | 113185526 | 113192368 | protein_coding | 16,64 | 0 |
| ENSG00000133835 | HSD17B4    | 5  | 119452443 | 119637199 | protein_coding | 16,64 | 0 |
| ENSG00000108591 | DRG2       | 17 | 18087886  | 18107971  | protein_coding | 16,63 | 0 |
| ENSG00000173821 | RNF213     | 17 | 80260866  | 80398786  | protein_coding | 16,61 | 0 |
| ENSG00000105723 | GSK3A      | 19 | 42230186  | 42242625  | protein_coding | 16,60 | 0 |
| ENSG00000183153 | GJD3       | 17 | 40362931  | 40363815  | protein_coding | 16,60 | 0 |
| ENSG00000158258 | CLSTN2     | 3  | 139935185 | 140577397 | protein_coding | 16,57 | 0 |
| ENSG00000167113 | COQ4       | 9  | 128322536 | 128334072 | protein_coding | 16,56 | 0 |
| ENSG00000100239 | PPP6R2     | 22 | 50343304  | 50445090  | protein_coding | 16,55 | 0 |
| ENSG00000196557 | CACNA1H    | 16 | 1153241   | 1221771   | protein_coding | 16,55 | 0 |
| ENSG00000134013 | LOXL2      | 8  | 23297189  | 23425328  | protein_coding | 16,54 | 0 |
| ENSG00000160256 | FAM207A    | 21 | 44940010  | 44976989  | protein_coding | 16,54 | 0 |
| ENSG00000142794 | NBPF3      | 1  | 21440128  | 21485005  | protein_coding | 16,54 | 0 |
| ENSG00000180138 | CSNK1A1L   | 13 | 37103259  | 37105664  | protein_coding | 16,53 | 0 |
| ENSG00000181381 | DDX60L     | 4  | 168356735 | 168537786 | protein_coding | 16,53 | 0 |
| ENSG00000168000 | BSCL2      | 11 | 62690275  | 62709845  | protein_coding | 16,53 | 0 |
| ENSG00000105778 | AVL9       | 7  | 32495426  | 32588721  | protein_coding | 16,53 | 0 |
| ENSG00000072849 | DERL2      | 17 | 5471251   | 5486811   | protein_coding | 16,51 | 0 |
| ENSG00000100991 | TRPC4AP    | 20 | 35002404  | 35092871  | protein_coding | 16,51 | 0 |
| ENSG00000125657 | TNFSF9     | 19 | 6530999   | 6535928   | protein_coding | 16,50 | 0 |
| ENSG00000174236 | REP15      | 12 | 27696519  | 27697596  | protein_coding | 16,50 | 0 |
| ENSG00000112782 | CLIC5      | 6  | 45898451  | 46080395  | protein_coding | 16,50 | 0 |
| ENSG00000165943 | MOAP1      | 14 | 93182196  | 93184928  | protein_coding | 16,50 | 0 |
| ENSG00000130119 | GNL3L      | X  | 54530211  | 54561071  | protein_coding | 16,49 | 0 |
| ENSG00000109133 | TMEM33     | 4  | 41935120  | 41960572  | protein_coding | 16,48 | 0 |
| ENSG00000188428 | BLOC1S5    | 6  | 8013567   | 8064414   | protein_coding | 16,48 | 0 |
| ENSG00000275464 | ENSG000002 | 21 | 5130871   | 5154734   | protein_coding | 16,48 | 0 |
| ENSG00000048028 | USP28      | 11 | 113797874 | 113875570 | protein_coding | 16,47 | 0 |

|                 |          |    |           |           |                |       |   |
|-----------------|----------|----|-----------|-----------|----------------|-------|---|
| ENSG00000106028 | SSBP1    | 7  | 141738321 | 141787922 | protein_coding | 16,47 | 0 |
| ENSG00000169814 | BTD      | 3  | 15601341  | 15645822  | protein_coding | 16,47 | 0 |
| ENSG00000121680 | PEX16    | 11 | 45909669  | 45918812  | protein_coding | 16,46 | 0 |
| ENSG00000111605 | CPSF6    | 12 | 69239537  | 69274358  | protein_coding | 16,43 | 0 |
| ENSG00000066117 | SMARCD1  | 12 | 50084972  | 50100712  | protein_coding | 16,43 | 0 |
| ENSG00000214063 | TSPAN4   | 11 | 842808    | 867116    | protein_coding | 16,42 | 0 |
| ENSG00000169169 | CPT1C    | 19 | 49690898  | 49713731  | protein_coding | 16,40 | 0 |
| ENSG00000241360 | PDXP     | 22 | 37658727  | 37666934  | protein_coding | 16,40 | 0 |
| ENSG00000003056 | M6PR     | 12 | 8940363   | 8949955   | protein_coding | 16,38 | 0 |
| ENSG00000241685 | ARPC1A   | 7  | 99325898  | 99388164  | protein_coding | 16,38 | 0 |
| ENSG00000182218 | HHIPL1   | 14 | 99645110  | 99680569  | protein_coding | 16,38 | 0 |
| ENSG00000148180 | GSN      | 9  | 121207794 | 121332843 | protein_coding | 16,37 | 0 |
| ENSG00000132716 | DCAF8    | 1  | 160215715 | 160262531 | protein_coding | 16,37 | 0 |
| ENSG00000166439 | RNF169   | 11 | 74748868  | 74842413  | protein_coding | 16,37 | 0 |
| ENSG00000150637 | CD226    | 18 | 69831158  | 69961803  | protein_coding | 16,35 | 0 |
| ENSG00000160124 | CCDC58   | 3  | 122359591 | 122383231 | protein_coding | 16,35 | 0 |
| ENSG00000175110 | MRPS22   | 3  | 139005806 | 139357223 | protein_coding | 16,34 | 0 |
| ENSG00000135824 | RGS8     | 1  | 182641816 | 182684576 | protein_coding | 16,33 | 0 |
| ENSG00000162825 | NBPF20   | 1  | 145289900 | 145405778 | protein_coding | 16,33 | 0 |
| ENSG00000095485 | CWF19L1  | 10 | 100232298 | 100267680 | protein_coding | 16,32 | 0 |
| ENSG00000174547 | MRPL11   | 11 | 66435075  | 66466738  | protein_coding | 16,32 | 0 |
| ENSG00000142949 | PTPRF    | 1  | 43525187  | 43623666  | protein_coding | 16,32 | 0 |
| ENSG00000108639 | SYNGR2   | 17 | 78168558  | 78173527  | protein_coding | 16,30 | 0 |
| ENSG00000134574 | DDB2     | 11 | 47214465  | 47239240  | protein_coding | 16,30 | 0 |
| ENSG00000126860 | EVI2A    | 17 | 31317560  | 31321884  | protein_coding | 16,30 | 0 |
| ENSG00000261272 | MUC22    | 6  | 31010474  | 31035402  | protein_coding | 16,30 | 0 |
| ENSG00000172061 | LRRC15   | 3  | 194355247 | 194369743 | protein_coding | 16,30 | 0 |
| ENSG00000132681 | ATP1A4   | 1  | 160151570 | 160186977 | protein_coding | 16,30 | 0 |
| ENSG00000240563 | L1TD1    | 1  | 62194831  | 62212328  | protein_coding | 16,29 | 0 |
| ENSG00000113448 | PDE4D    | 5  | 58969038  | 60522120  | protein_coding | 16,23 | 0 |
| ENSG00000134086 | VHL      | 3  | 10141008  | 10152220  | protein_coding | 16,23 | 0 |
| ENSG00000100034 | PPM1F    | 22 | 21919420  | 21952837  | protein_coding | 16,22 | 0 |
| ENSG00000117707 | PROX1    | 1  | 213983181 | 214041502 | protein_coding | 16,22 | 0 |
| ENSG00000092847 | AGO1     | 1  | 35869808  | 35930528  | protein_coding | 16,21 | 0 |
| ENSG00000099994 | SUSD2    | 22 | 24181259  | 24189110  | protein_coding | 16,20 | 0 |
| ENSG00000074966 | TXK      | 4  | 48066393  | 48134256  | protein_coding | 16,20 | 0 |
| ENSG00000162669 | HFM1     | 1  | 91260766  | 91404869  | protein_coding | 16,20 | 0 |
| ENSG00000125249 | RAP2A    | 13 | 97434222  | 97469128  | protein_coding | 16,19 | 0 |
| ENSG00000068971 | PPP2R5B  | 11 | 64917553  | 64934473  | protein_coding | 16,18 | 0 |
| ENSG00000198723 | C19orf45 | 19 | 7492976   | 7508450   | protein_coding | 16,18 | 0 |
| ENSG00000124422 | USP22    | 17 | 20999593  | 21043760  | protein_coding | 16,18 | 0 |
| ENSG00000162650 | ATXN7L2  | 1  | 109483479 | 109492804 | protein_coding | 16,16 | 0 |
| ENSG00000100461 | RBM23    | 14 | 22893206  | 22919184  | protein_coding | 16,14 | 0 |
| ENSG00000171792 | RHNO1    | 12 | 2876258   | 2889523   | protein_coding | 16,13 | 0 |
| ENSG00000129167 | TPH1     | 11 | 18017564  | 18042426  | protein_coding | 16,13 | 0 |
| ENSG00000099308 | MAST3    | 19 | 18097793  | 18151692  | protein_coding | 16,12 | 0 |
| ENSG00000243147 | MRPL33   | 2  | 27771717  | 27988087  | protein_coding | 16,12 | 0 |
| ENSG00000102144 | PGK1     | X  | 78065188  | 78129296  | protein_coding | 16,12 | 0 |
| ENSG00000163545 | NUAK2    | 1  | 205302059 | 205321791 | protein_coding | 16,12 | 0 |
| ENSG00000107902 | LHPP     | 10 | 124461834 | 124617888 | protein_coding | 16,11 | 0 |
| ENSG00000132518 | GUCY2D   | 17 | 8002594   | 8020339   | protein_coding | 16,10 | 0 |
| ENSG00000158517 | NCF1     | 7  | 74773962  | 74789315  | protein_coding | 16,10 | 0 |
| ENSG00000173757 | STAT5B   | 17 | 42199168  | 42276707  | protein_coding | 16,10 | 0 |
| ENSG00000115414 | FN1      | 2  | 215360440 | 215436172 | protein_coding | 16,09 | 0 |
| ENSG00000114745 | GORASP1  | 3  | 39096659  | 39108363  | protein_coding | 16,09 | 0 |
| ENSG00000160401 | CFAP157  | 9  | 127706989 | 127716002 | protein_coding | 16,07 | 0 |
| ENSG00000172932 | ANKRD13D | 11 | 67288547  | 67302485  | protein_coding | 16,06 | 0 |
| ENSG00000115808 | STRN     | 2  | 36843640  | 36966472  | protein_coding | 16,05 | 0 |

|                 |           |    |           |           |                |       |   |
|-----------------|-----------|----|-----------|-----------|----------------|-------|---|
| ENSG00000168779 | SHOX2     | 3  | 158095954 | 158106503 | protein_coding | 16,04 | 0 |
| ENSG00000041802 | LSG1      | 3  | 194640788 | 194672477 | protein_coding | 16,04 | 0 |
| ENSG00000117450 | PRDX1     | 1  | 45511036  | 45523047  | protein_coding | 16,04 | 0 |
| ENSG00000119689 | DLST      | 14 | 74881891  | 74903745  | protein_coding | 16,01 | 0 |
| ENSG00000082781 | ITGB5     | 3  | 124761948 | 124901418 | protein_coding | 16,01 | 0 |
| ENSG00000182749 | PAQR7     | 1  | 25861210  | 25871253  | protein_coding | 16,01 | 0 |
| ENSG00000184009 | ACTG1     | 17 | 81509971  | 81523847  | protein_coding | 16,00 | 0 |
| ENSG00000149474 | CSRP2BP   | 20 | 18138118  | 18188387  | protein_coding | 16,00 | 0 |
| ENSG00000012174 | MBTPS2    | X  | 21839636  | 21885424  | protein_coding | 16,00 | 0 |
| ENSG00000001167 | NFYA      | 6  | 41072945  | 41099976  | protein_coding | 15,99 | 0 |
| ENSG00000179091 | CYC1      | 8  | 144095027 | 144097525 | protein_coding | 15,98 | 0 |
| ENSG00000166949 | SMAD3     | 15 | 67063763  | 67195195  | protein_coding | 15,98 | 0 |
| ENSG00000100811 | YY1       | 14 | 100238298 | 100282792 | protein_coding | 15,97 | 0 |
| ENSG00000155324 | GRAMD3    | 5  | 126360132 | 126496494 | protein_coding | 15,95 | 0 |
| ENSG00000064607 | SUGP2     | 19 | 18990888  | 19034023  | protein_coding | 15,94 | 0 |
| ENSG00000110042 | DTX4      | 11 | 59171430  | 59208587  | protein_coding | 15,93 | 0 |
| ENSG00000123091 | RNF11     | 1  | 51236271  | 51273455  | protein_coding | 15,93 | 0 |
| ENSG00000196632 | WNK3      | X  | 54192823  | 54358642  | protein_coding | 15,91 | 0 |
| ENSG00000172878 | METAP1D   | 2  | 171999583 | 172082430 | protein_coding | 15,91 | 0 |
| ENSG00000145244 | CORIN     | 4  | 47593998  | 47838106  | protein_coding | 15,90 | 0 |
| ENSG00000159461 | AMFR      | 16 | 56361452  | 56425538  | protein_coding | 15,90 | 0 |
| ENSG00000066027 | PPP2R5A   | 1  | 212285537 | 212361863 | protein_coding | 15,90 | 0 |
| ENSG00000156239 | N6AMT1    | 21 | 28872191  | 28885371  | protein_coding | 15,89 | 0 |
| ENSG00000049769 | PPP1R3F   | X  | 49269843  | 49301461  | protein_coding | 15,89 | 0 |
| ENSG00000105379 | ETFB      | 19 | 51345169  | 51366418  | protein_coding | 15,89 | 0 |
| ENSG00000124713 | GNMT      | 6  | 42960758  | 42963880  | protein_coding | 15,88 | 0 |
| ENSG00000006125 | AP2B1     | 17 | 35578046  | 35726409  | protein_coding | 15,86 | 0 |
| ENSG00000196757 | ZNF700    | 19 | 11925068  | 11950773  | protein_coding | 15,84 | 0 |
| ENSG00000121940 | CLCC1     | 1  | 108929508 | 108963457 | protein_coding | 15,83 | 0 |
| ENSG00000172725 | CORO1B    | 11 | 67435510  | 67443821  | protein_coding | 15,83 | 0 |
| ENSG00000198157 | HMG5      | X  | 81113701  | 81201942  | protein_coding | 15,81 | 0 |
| ENSG00000176681 | LRRC37A   | 17 | 46292733  | 46337794  | protein_coding | 15,80 | 0 |
| ENSG00000146005 | PSD2      | 5  | 139795821 | 139844466 | protein_coding | 15,80 | 0 |
| ENSG00000145287 | PLAC8     | 4  | 83090048  | 83137075  | protein_coding | 15,80 | 0 |
| ENSG00000132688 | NES       | 1  | 156668763 | 156677397 | protein_coding | 15,79 | 0 |
| ENSG00000138670 | RASGEF1B  | 4  | 81426393  | 82044244  | protein_coding | 15,79 | 0 |
| ENSG00000108588 | CCDC47    | 17 | 63745250  | 63776351  | protein_coding | 15,78 | 0 |
| ENSG00000100490 | CDKL1     | 14 | 50329404  | 50416461  | protein_coding | 15,77 | 0 |
| ENSG00000132773 | TOE1      | 1  | 45339670  | 45343975  | protein_coding | 15,77 | 0 |
| ENSG00000090863 | GLG1      | 16 | 74447427  | 74607144  | protein_coding | 15,77 | 0 |
| ENSG00000130529 | TRPM4     | 19 | 49157741  | 49211836  | protein_coding | 15,77 | 0 |
| ENSG00000101162 | TUBB1     | 20 | 59019254  | 59026654  | protein_coding | 15,76 | 0 |
| ENSG00000138668 | HNRNPD    | 4  | 82352498  | 82374503  | protein_coding | 15,76 | 0 |
| ENSG00000104368 | PLAT      | 8  | 42175233  | 42207724  | protein_coding | 15,74 | 0 |
| ENSG00000175782 | SLC35E3   | 12 | 68746106  | 68793964  | protein_coding | 15,73 | 0 |
| ENSG00000075391 | RASAL2    | 1  | 178094141 | 178484147 | protein_coding | 15,72 | 0 |
| ENSG00000154263 | ABCA10    | 17 | 69147214  | 69244846  | protein_coding | 15,71 | 0 |
| ENSG00000130772 | MED18     | 1  | 28329002  | 28335967  | protein_coding | 15,70 | 0 |
| ENSG00000188092 | GPR89B    | 1  | 147928393 | 147993521 | protein_coding | 15,70 | 0 |
| ENSG00000125531 | C20orf195 | 20 | 63547891  | 63556708  | protein_coding | 15,70 | 0 |
| ENSG00000197471 | SPN       | 16 | 29662979  | 29670876  | protein_coding | 15,70 | 0 |
| ENSG00000169885 | CALML6    | 1  | 1914827   | 1917296   | protein_coding | 15,70 | 0 |
| ENSG00000038532 | CLEC16A   | 16 | 10944488  | 11182189  | protein_coding | 15,69 | 0 |
| ENSG00000100593 | ISM2      | 14 | 77474394  | 77498850  | protein_coding | 15,67 | 0 |
| ENSG00000147121 | KRBOX4    | X  | 46446857  | 46497422  | protein_coding | 15,67 | 0 |
| ENSG00000064115 | TM7SF3    | 12 | 26973195  | 27014434  | protein_coding | 15,66 | 0 |
| ENSG00000145331 | TRMT10A   | 4  | 99546709  | 99564032  | protein_coding | 15,64 | 0 |
| ENSG00000129911 | KLF16     | 19 | 1852399   | 1863568   | protein_coding | 15,63 | 0 |

|                 |            |    |           |           |                |       |   |
|-----------------|------------|----|-----------|-----------|----------------|-------|---|
| ENSG00000160345 | C9orf116   | 9  | 135495181 | 135501734 | protein_coding | 15,63 | 0 |
| ENSG00000123136 | DDX39A     | 19 | 14408819  | 14419383  | protein_coding | 15,62 | 0 |
| ENSG00000258643 | BCL2L2-PAB | 14 | 23306835  | 23325369  | protein_coding | 15,60 | 0 |
| ENSG00000174807 | CD248      | 11 | 66314487  | 66317044  | protein_coding | 15,60 | 0 |
| ENSG00000196932 | TMEM26     | 10 | 61406643  | 61453450  | protein_coding | 15,60 | 0 |
| ENSG00000068323 | TFE3       | X  | 49028726  | 49043486  | protein_coding | 15,59 | 0 |
| ENSG00000136574 | GATA4      | 8  | 11676959  | 11760002  | protein_coding | 15,59 | 0 |
| ENSG00000101000 | PROCR      | 20 | 35172073  | 35216240  | protein_coding | 15,59 | 0 |
| ENSG00000184640 | 09/01/2009 | 17 | 77280569  | 77500596  | protein_coding | 15,59 | 0 |
| ENSG00000127022 | CANX       | 5  | 179678628 | 179730925 | protein_coding | 15,58 | 0 |
| ENSG00000174373 | RALGAPA1   | 14 | 35538352  | 35809304  | protein_coding | 15,57 | 0 |
| ENSG00000163399 | ATP1A1     | 1  | 116372668 | 116410261 | protein_coding | 15,57 | 0 |
| ENSG00000170903 | MSANTD4    | 11 | 105995623 | 106022403 | protein_coding | 15,55 | 0 |
| ENSG00000150753 | CCT5       | 5  | 10249921  | 10266412  | protein_coding | 15,55 | 0 |
| ENSG00000132781 | MUTYH      | 1  | 45329163  | 45340470  | protein_coding | 15,52 | 0 |
| ENSG00000139880 | CDH24      | 14 | 23047062  | 23057538  | protein_coding | 15,52 | 0 |
| ENSG00000177752 | YIPF7      | 4  | 44622065  | 44678556  | protein_coding | 15,50 | 0 |
| ENSG00000173110 | HSPA6      | 1  | 161524540 | 161526910 | protein_coding | 15,50 | 0 |
| ENSG00000166902 | MRPL16     | 11 | 59806135  | 59810872  | protein_coding | 15,49 | 0 |
| ENSG00000105707 | HPN        | 19 | 35040506  | 35066571  | protein_coding | 15,46 | 0 |
| ENSG00000175137 | SH3BP5L    | 1  | 248810446 | 248826633 | protein_coding | 15,46 | 0 |
| ENSG00000111641 | NOP2       | 12 | 6556863   | 6568691   | protein_coding | 15,46 | 0 |
| ENSG00000171121 | KCNMB3     | 3  | 179236691 | 179267002 | protein_coding | 15,45 | 0 |
| ENSG00000167775 | CD320      | 19 | 8302127   | 8308356   | protein_coding | 15,45 | 0 |
| ENSG00000187513 | GJA4       | 1  | 34792998  | 34795747  | protein_coding | 15,44 | 0 |
| ENSG00000007968 | E2F2       | 1  | 23506430  | 23531220  | protein_coding | 15,43 | 0 |
| ENSG00000187957 | DNER       | 2  | 229357629 | 229714558 | protein_coding | 15,42 | 0 |
| ENSG00000162946 | DISC1      | 1  | 231626815 | 232041272 | protein_coding | 15,41 | 0 |
| ENSG00000167419 | LPO        | 17 | 58218548  | 58268518  | protein_coding | 15,40 | 0 |
| ENSG00000124772 | CPNE5      | 6  | 36740775  | 36840002  | protein_coding | 15,40 | 0 |
| ENSG00000122176 | FMOD       | 1  | 203340628 | 203351489 | protein_coding | 15,40 | 0 |
| ENSG00000185127 | C6orf120   | 6  | 169702190 | 169704856 | protein_coding | 15,39 | 0 |
| ENSG00000135736 | CCDC102A   | 16 | 57512178  | 57536599  | protein_coding | 15,39 | 0 |
| ENSG00000002016 | RAD52      | 12 | 912077    | 990053    | protein_coding | 15,38 | 0 |
| ENSG00000142675 | CNKSR1     | 1  | 26177403  | 26189886  | protein_coding | 15,38 | 0 |
| ENSG00000070269 | TMEM260    | 14 | 56488354  | 56650606  | protein_coding | 15,37 | 0 |
| ENSG00000116151 | MORN1      | 1  | 2321253   | 2391707   | protein_coding | 15,37 | 0 |
| ENSG00000135436 | FAM186B    | 12 | 49582885  | 49605639  | protein_coding | 15,36 | 0 |
| ENSG00000163472 | TMEM79     | 1  | 156282935 | 156293185 | protein_coding | 15,35 | 0 |
| ENSG00000132510 | KDM6B      | 17 | 7839904   | 7854796   | protein_coding | 15,34 | 0 |
| ENSG00000173166 | RAPH1      | 2  | 203394345 | 203535410 | protein_coding | 15,32 | 0 |
| ENSG00000198964 | SGMS1      | 10 | 50305586  | 50625163  | protein_coding | 15,32 | 0 |
| ENSG00000128039 | SRD5A3     | 4  | 55346109  | 55373096  | protein_coding | 15,32 | 0 |
| ENSG00000150459 | SAP18      | 13 | 21140514  | 21149084  | protein_coding | 15,32 | 0 |
| ENSG00000173456 | RNF26      | 11 | 119334527 | 119337313 | protein_coding | 15,32 | 0 |
| ENSG00000089248 | ERP29      | 12 | 112013316 | 112023451 | protein_coding | 15,32 | 0 |
| ENSG00000160949 | TONSL      | 8  | 144428775 | 144444444 | protein_coding | 15,32 | 0 |
| ENSG00000163655 | GMPS       | 3  | 155870536 | 155944026 | protein_coding | 15,31 | 0 |
| ENSG00000197405 | C5AR1      | 19 | 47290023  | 47322066  | protein_coding | 15,31 | 0 |
| ENSG00000168439 | STIP1      | 11 | 64185272  | 64204543  | protein_coding | 15,31 | 0 |
| ENSG00000165555 | NOXRED1    | 14 | 77394021  | 77423517  | protein_coding | 15,30 | 0 |
| ENSG00000162631 | NTNG1      | 1  | 107140007 | 107483458 | protein_coding | 15,30 | 0 |
| ENSG00000108523 | RNF167     | 17 | 4940008   | 4945222   | protein_coding | 15,30 | 0 |
| ENSG00000281079 | ENSG000002 | 17 | 42993098  | 42993781  | protein_coding | 15,27 | 0 |
| ENSG00000167733 | HSD11B1L   | 19 | 5680604   | 5688523   | protein_coding | 15,27 | 0 |
| ENSG00000189241 | TSPYL1     | 6  | 116276578 | 116279903 | protein_coding | 15,26 | 0 |
| ENSG00000119760 | SUPT7L     | 2  | 27650812  | 27663840  | protein_coding | 15,23 | 0 |
| ENSG00000180543 | TSPYL5     | 8  | 97273474  | 97277964  | protein_coding | 15,22 | 0 |

|                 |            |    |           |           |                |       |   |
|-----------------|------------|----|-----------|-----------|----------------|-------|---|
| ENSG00000167528 | ZNF641     | 12 | 48337180  | 48351414  | protein_coding | 15,22 | 0 |
| ENSG00000172404 | DNAJB7     | 22 | 40859549  | 40862126  | protein_coding | 15,22 | 0 |
| ENSG00000080845 | DLGAP4     | 20 | 36306336  | 36528637  | protein_coding | 15,21 | 0 |
| ENSG00000112893 | MAN2A1     | 5  | 109689366 | 109869625 | protein_coding | 15,21 | 0 |
| ENSG00000158955 | WNT9B      | 17 | 46833201  | 46886730  | protein_coding | 15,20 | 0 |
| ENSG00000262576 | PCDHGA4    | 5  | 141355025 | 141512979 | protein_coding | 15,20 | 0 |
| ENSG00000243989 | ACY1       | 3  | 51983340  | 51989197  | protein_coding | 15,20 | 0 |
| ENSG00000100109 | TFIP11     | 22 | 26491225  | 26512505  | protein_coding | 15,20 | 0 |
| ENSG00000148308 | GTF3C5     | 9  | 133030675 | 133058503 | protein_coding | 15,16 | 0 |
| ENSG00000176894 | PXMP2      | 12 | 132687606 | 132704991 | protein_coding | 15,15 | 0 |
| ENSG00000239697 | TNFSF12    | 17 | 7548891   | 7557890   | protein_coding | 15,15 | 0 |
| ENSG00000196182 | STK40      | 1  | 36339624  | 36385896  | protein_coding | 15,15 | 0 |
| ENSG00000163126 | ANKRD23    | 2  | 96824526  | 96857934  | protein_coding | 15,14 | 0 |
| ENSG00000164647 | STEAP1     | 7  | 90154375  | 90164829  | protein_coding | 15,13 | 0 |
| ENSG00000121671 | CRY2       | 11 | 45847118  | 45883248  | protein_coding | 15,13 | 0 |
| ENSG00000108561 | C1QBP      | 17 | 5432777   | 5448830   | protein_coding | 15,12 | 0 |
| ENSG00000179832 | MROH1      | 8  | 144148016 | 144261940 | protein_coding | 15,11 | 0 |
| ENSG00000131355 | ADGRE3     | 19 | 14619117  | 14690027  | protein_coding | 15,10 | 0 |
| ENSG00000170482 | SLC23A1    | 5  | 139367196 | 139384553 | protein_coding | 15,10 | 0 |
| ENSG00000280649 | ENSG000002 | 1  | 148458814 | 148459871 | protein_coding | 15,10 | 0 |
| ENSG00000165185 | KIAA1958   | 9  | 112486847 | 112669397 | protein_coding | 15,10 | 0 |
| ENSG00000183977 | PP2D1      | 3  | 19979961  | 20012330  | protein_coding | 15,09 | 0 |
| ENSG00000128928 | IVD        | 15 | 40405795  | 40435947  | protein_coding | 15,09 | 0 |
| ENSG00000188859 | FAM78B     | 1  | 166057426 | 166166969 | protein_coding | 15,09 | 0 |
| ENSG00000173726 | TOMM20     | 1  | 235109336 | 235128936 | protein_coding | 15,08 | 0 |
| ENSG00000172803 | SNX32      | 11 | 65833641  | 65856896  | protein_coding | 15,05 | 0 |
| ENSG00000049618 | ARID1B     | 6  | 156777374 | 157210779 | protein_coding | 15,02 | 0 |
| ENSG00000085063 | CD59       | 11 | 33698261  | 33736445  | protein_coding | 15,01 | 0 |
| ENSG00000183307 | CECR6      | 22 | 17116299  | 17121367  | protein_coding | 15,00 | 0 |
| ENSG00000179761 | PIPOX      | 17 | 28950513  | 29057220  | protein_coding | 15,00 | 0 |
| ENSG00000095970 | TREM2      | 6  | 41158506  | 41163186  | protein_coding | 15,00 | 0 |
| ENSG00000254221 | PCDHGB1    | 5  | 141350102 | 141512979 | protein_coding | 15,00 | 0 |
| ENSG00000181322 | NME9       | 3  | 138261437 | 138329886 | protein_coding | 15,00 | 0 |
| ENSG00000185112 | FAM43A     | 3  | 194686544 | 194689037 | protein_coding | 15,00 | 0 |
| ENSG00000020633 | RUNX3      | 1  | 24899511  | 24965121  | protein_coding | 15,00 | 0 |
| ENSG00000013375 | PGM3       | 6  | 83161150  | 83193936  | protein_coding | 14,99 | 0 |
| ENSG00000044446 | PHKA2      | X  | 18892300  | 18984598  | protein_coding | 14,99 | 0 |
| ENSG00000073711 | PPP2R3A    | 3  | 135965673 | 136147891 | protein_coding | 14,98 | 0 |
| ENSG00000166783 | KIAA0430   | 16 | 15594386  | 15643166  | protein_coding | 14,98 | 0 |
| ENSG00000177374 | HIC1       | 17 | 2054154   | 2063241   | protein_coding | 14,96 | 0 |
| ENSG00000251192 | ZNF674     | X  | 46497727  | 46545457  | protein_coding | 14,96 | 0 |
| ENSG00000168036 | CTNNB1     | 3  | 41194837  | 41260096  | protein_coding | 14,93 | 0 |
| ENSG00000151116 | UEVLD      | 11 | 18529609  | 18588747  | protein_coding | 14,93 | 0 |
| ENSG00000100263 | RHBDD3     | 22 | 29259852  | 29268209  | protein_coding | 14,92 | 0 |
| ENSG00000165233 | CARD19     | 9  | 93096218  | 93113283  | protein_coding | 14,92 | 0 |
| ENSG00000011295 | TTC19      | 17 | 15999380  | 16045015  | protein_coding | 14,91 | 0 |
| ENSG00000213658 | LAT        | 16 | 28984826  | 28990783  | protein_coding | 14,90 | 0 |
| ENSG00000079689 | SCGN       | 6  | 25652201  | 25701783  | protein_coding | 14,90 | 0 |
| ENSG00000117593 | DARS2      | 1  | 173824503 | 173858546 | protein_coding | 14,89 | 0 |
| ENSG00000156253 | RWDD2B     | 21 | 29004384  | 29019378  | protein_coding | 14,89 | 0 |
| ENSG00000197892 | KIF13B     | 8  | 29067279  | 29263124  | protein_coding | 14,89 | 0 |
| ENSG00000049768 | FOXP3      | X  | 49250436  | 49264826  | protein_coding | 14,89 | 0 |
| ENSG00000110717 | NDUFS8     | 11 | 68030617  | 68036644  | protein_coding | 14,88 | 0 |
| ENSG00000115677 | HDLBP      | 2  | 241227264 | 241317061 | protein_coding | 14,87 | 0 |
| ENSG00000133247 | SUV420H2   | 19 | 55339853  | 55348120  | protein_coding | 14,87 | 0 |
| ENSG00000196591 | HDAC2      | 6  | 113933028 | 114011308 | protein_coding | 14,87 | 0 |
| ENSG00000100796 | PPP4R3A    | 14 | 91457611  | 91510554  | protein_coding | 14,87 | 0 |
| ENSG00000067221 | STOML1     | 15 | 73978923  | 73994622  | protein_coding | 14,86 | 0 |



|                 |            |    |           |           |                |       |   |
|-----------------|------------|----|-----------|-----------|----------------|-------|---|
| ENSG0000071794  | HMTF       | 3  | 149030127 | 149086554 | protein_coding | 14,84 | 0 |
| ENSG00000241399 | CD302      | 2  | 159768630 | 159798255 | protein_coding | 14,82 | 0 |
| ENSG00000183207 | RUVBL2     | 19 | 48993448  | 49015995  | protein_coding | 14,81 | 0 |
| ENSG00000128271 | ADORA2A    | 22 | 24417879  | 24442360  | protein_coding | 14,80 | 0 |
| ENSG00000177721 | ANXA2R     | 5  | 43039081  | 43043170  | protein_coding | 14,80 | 0 |
| ENSG00000167380 | ZNF226     | 19 | 44165073  | 44178381  | protein_coding | 14,79 | 0 |
| ENSG00000160584 | SIK3       | 11 | 116843402 | 117098437 | protein_coding | 14,79 | 0 |
| ENSG00000007168 | PAFAH1B1   | 17 | 2593210   | 2685615   | protein_coding | 14,78 | 0 |
| ENSG00000118894 | EEF2KMT    | 16 | 5084304   | 5097808   | protein_coding | 14,77 | 0 |
| ENSG00000070061 | IKBKAP     | 9  | 108867517 | 108934116 | protein_coding | 14,76 | 0 |
| ENSG00000167815 | PRDX2      | 19 | 12796820  | 12801859  | protein_coding | 14,76 | 0 |
| ENSG00000166747 | AP1G1      | 16 | 71729000  | 71809201  | protein_coding | 14,75 | 0 |
| ENSG00000273398 | ENSG000002 | 2  | 68131238  | 68261230  | protein_coding | 14,74 | 0 |
| ENSG00000006638 | TBXA2R     | 19 | 3594506   | 3606840   | protein_coding | 14,73 | 0 |
| ENSG00000131871 | VIMP       | 15 | 101270817 | 101277500 | protein_coding | 14,73 | 0 |
| ENSG00000141499 | WRAP53     | 17 | 7686071   | 7703502   | protein_coding | 14,72 | 0 |
| ENSG00000002919 | SNX11      | 17 | 48103357  | 48123074  | protein_coding | 14,70 | 0 |
| ENSG00000129214 | SHBG       | 17 | 7613946   | 7633383   | protein_coding | 14,70 | 0 |
| ENSG00000185905 | C16orf54   | 16 | 29742463  | 29746006  | protein_coding | 14,70 | 0 |
| ENSG00000137177 | KIF13A     | 6  | 17759183  | 17987623  | protein_coding | 14,70 | 0 |
| ENSG00000196396 | PTPN1      | 20 | 50510321  | 50585241  | protein_coding | 14,70 | 0 |
| ENSG00000179010 | MRFAP1     | 4  | 6640091   | 6642745   | protein_coding | 14,68 | 0 |
| ENSG00000124299 | PEPD       | 19 | 33386950  | 33521794  | protein_coding | 14,68 | 0 |
| ENSG00000139324 | TMTC3      | 12 | 88142296  | 88199887  | protein_coding | 14,68 | 0 |
| ENSG00000137074 | APTX       | 9  | 32972606  | 33025168  | protein_coding | 14,68 | 0 |
| ENSG00000164961 | KIAA0196   | 8  | 125024260 | 125091840 | protein_coding | 14,67 | 0 |
| ENSG00000125089 | SH3TC1     | 4  | 8182072   | 8241803   | protein_coding | 14,67 | 0 |
| ENSG00000125844 | RRBP1      | 20 | 17613678  | 17682295  | protein_coding | 14,64 | 0 |
| ENSG00000119547 | ONECUT2    | 18 | 57435685  | 57491297  | protein_coding | 14,63 | 0 |
| ENSG00000106460 | TMEM106B   | 7  | 12211241  | 12243367  | protein_coding | 14,63 | 0 |
| ENSG00000197536 | C5orf56    | 5  | 132410636 | 132476044 | protein_coding | 14,62 | 0 |
| ENSG00000132485 | ZRANB2     | 1  | 71063291  | 71081297  | protein_coding | 14,61 | 0 |
| ENSG00000156500 | FAM122C    | X  | 134796789 | 134854610 | protein_coding | 14,59 | 0 |
| ENSG00000157916 | RER1       | 1  | 2391775   | 2405444   | protein_coding | 14,57 | 0 |
| ENSG00000166532 | RIMKLB     | 12 | 8681600   | 8783095   | protein_coding | 14,57 | 0 |
| ENSG00000172458 | IL17D      | 13 | 20702127  | 20723098  | protein_coding | 14,56 | 0 |
| ENSG00000139173 | TMEM117    | 12 | 43835967  | 44389762  | protein_coding | 14,56 | 0 |
| ENSG00000197982 | C1orf122   | 1  | 37806979  | 37809454  | protein_coding | 14,56 | 0 |
| ENSG00000128604 | IRF5       | 7  | 128937612 | 128950035 | protein_coding | 14,55 | 0 |
| ENSG00000108515 | ENO3       | 17 | 4948092   | 4957131   | protein_coding | 14,55 | 0 |
| ENSG00000105393 | BABAM1     | 19 | 17267350  | 17281249  | protein_coding | 14,53 | 0 |
| ENSG00000183665 | TRMT12     | 8  | 124450820 | 124462150 | protein_coding | 14,51 | 0 |
| ENSG00000204946 | ZNF783     | 7  | 149262171 | 149297302 | protein_coding | 14,50 | 0 |
| ENSG00000196405 | EVL        | 14 | 99971449  | 100144236 | protein_coding | 14,49 | 0 |
| ENSG00000166557 | TMED3      | 15 | 79311062  | 79427432  | protein_coding | 14,49 | 0 |
| ENSG00000025796 | SEC63      | 6  | 107867756 | 107958189 | protein_coding | 14,49 | 0 |
| ENSG00000109381 | ELF2       | 4  | 139028112 | 139177218 | protein_coding | 14,49 | 0 |
| ENSG00000169085 | C8orf46    | 8  | 66460003  | 66518524  | protein_coding | 14,48 | 0 |
| ENSG00000034152 | MAP2K3     | 17 | 21284672  | 21315240  | protein_coding | 14,48 | 0 |
| ENSG00000062524 | LTK        | 15 | 41503638  | 41513887  | protein_coding | 14,48 | 0 |
| ENSG00000144231 | POLR2D     | 2  | 127843551 | 127858157 | protein_coding | 14,46 | 0 |
| ENSG00000196628 | TCF4       | 18 | 55222331  | 55664787  | protein_coding | 14,46 | 0 |
| ENSG00000083807 | SLC27A5    | 19 | 58479512  | 58512413  | protein_coding | 14,46 | 0 |
| ENSG00000163468 | CCT3       | 1  | 156308968 | 156367873 | protein_coding | 14,45 | 0 |
| ENSG00000120693 | SMAD9      | 13 | 36844831  | 36920765  | protein_coding | 14,42 | 0 |
| ENSG00000176986 | SEC24C     | 10 | 73744384  | 73772161  | protein_coding | 14,42 | 0 |
| ENSG00000186074 | CD300LF    | 17 | 74694311  | 74712978  | protein_coding | 14,40 | 0 |
| ENSG00000124602 | UNC5CL     | 6  | 41026911  | 41039217  | protein_coding | 14,40 | 0 |

|                 |                 |    |           |           |                |       |   |
|-----------------|-----------------|----|-----------|-----------|----------------|-------|---|
| ENSG00000268279 | ENSG00000268279 | 3  | 14135217  | 14148252  | protein_coding | 14,40 | 0 |
| ENSG00000186891 | TNFRSF18        | 1  | 1203508   | 1206691   | protein_coding | 14,40 | 0 |
| ENSG00000109606 | DHX15           | 4  | 24517441  | 24584550  | protein_coding | 14,40 | 0 |
| ENSG00000263002 | ZNF234          | 19 | 44141557  | 44160309  | protein_coding | 14,39 | 0 |
| ENSG00000093217 | XYLB            | 3  | 38346760  | 38421348  | protein_coding | 14,39 | 0 |
| ENSG00000168575 | SLC20A2         | 8  | 42416475  | 42541926  | protein_coding | 14,39 | 0 |
| ENSG00000138698 | RAP1GDS1        | 4  | 98261384  | 98443861  | protein_coding | 14,38 | 0 |
| ENSG00000133243 | BTBD2           | 19 | 1985438   | 2034881   | protein_coding | 14,37 | 0 |
| ENSG00000166025 | AMOTL1          | 11 | 94706431  | 94876753  | protein_coding | 14,37 | 0 |
| ENSG00000129991 | TNNI3           | 19 | 55151767  | 55157773  | protein_coding | 14,35 | 0 |
| ENSG00000169398 | PTK2            | 8  | 140657900 | 141002216 | protein_coding | 14,33 | 0 |
| ENSG00000154099 | DNAAF1          | 16 | 84145287  | 84178767  | protein_coding | 14,33 | 0 |
| ENSG00000239388 | ASB14           | 3  | 57268347  | 57292682  | protein_coding | 14,31 | 0 |
| ENSG00000166847 | DCTN5           | 16 | 23641392  | 23677455  | protein_coding | 14,31 | 0 |
| ENSG00000267060 | PTGES3L         | 17 | 42968088  | 42980433  | protein_coding | 14,30 | 0 |
| ENSG00000214872 | SMTNL1          | 11 | 57542641  | 57550274  | protein_coding | 14,30 | 0 |
| ENSG00000278868 | ENSG00000278868 | 1  | 27850574  | 27850744  | protein_coding | 14,30 | 0 |
| ENSG00000156639 | ZFAND3          | 6  | 37819499  | 38154624  | protein_coding | 14,29 | 0 |
| ENSG00000133812 | SBF2            | 11 | 9778667   | 10294207  | protein_coding | 14,29 | 0 |
| ENSG00000174437 | ATP2A2          | 12 | 110280756 | 110351093 | protein_coding | 14,27 | 0 |
| ENSG00000179041 | RRS1            | 8  | 66429028  | 66430733  | protein_coding | 14,27 | 0 |
| ENSG00000006016 | CRLF1           | 19 | 18572220  | 18607741  | protein_coding | 14,26 | 0 |
| ENSG00000143224 | PPOX            | 1  | 161166410 | 161178013 | protein_coding | 14,26 | 0 |
| ENSG00000132824 | SERINC3         | 20 | 44496221  | 44522109  | protein_coding | 14,26 | 0 |
| ENSG00000068400 | GRIPAP1         | X  | 48973720  | 49002264  | protein_coding | 14,25 | 0 |
| ENSG00000177731 | FLII            | 17 | 18244836  | 18258916  | protein_coding | 14,25 | 0 |
| ENSG00000115904 | SOS1            | 2  | 38981396  | 39124345  | protein_coding | 14,24 | 0 |
| ENSG00000031823 | RANBP3          | 19 | 5916139   | 5978142   | protein_coding | 14,23 | 0 |
| ENSG00000039123 | SKIV2L2         | 5  | 55307760  | 55425581  | protein_coding | 14,23 | 0 |
| ENSG00000184402 | SS18L1          | 20 | 62143795  | 62182484  | protein_coding | 14,23 | 0 |
| ENSG00000102226 | USP11           | X  | 47232690  | 47248328  | protein_coding | 14,23 | 0 |
| ENSG00000059122 | FLYWCH1         | 16 | 2911937   | 2951208   | protein_coding | 14,22 | 0 |
| ENSG00000204314 | PRRT1           | 6  | 32148359  | 32154373  | protein_coding | 14,22 | 0 |
| ENSG00000198546 | ZNF511          | 10 | 133308475 | 133313162 | protein_coding | 14,22 | 0 |
| ENSG00000130177 | CDC16           | 13 | 114234887 | 114272723 | protein_coding | 14,21 | 0 |
| ENSG00000108599 | AKAP10          | 17 | 19904302  | 19978343  | protein_coding | 14,21 | 0 |
| ENSG00000152818 | UTRN            | 6  | 144285701 | 144853034 | protein_coding | 14,21 | 0 |
| ENSG00000105383 | CD33            | 19 | 51225064  | 51243860  | protein_coding | 14,20 | 0 |
| ENSG00000165775 | FUNDC2          | X  | 155025980 | 155060303 | protein_coding | 14,19 | 0 |
| ENSG00000203791 | METTL10         | 10 | 124748149 | 124791870 | protein_coding | 14,19 | 0 |
| ENSG00000196517 | SLC6A9          | 1  | 43991500  | 44031467  | protein_coding | 14,17 | 0 |
| ENSG00000197860 | SGTB            | 5  | 65665928  | 65723035  | protein_coding | 14,17 | 0 |
| ENSG00000065060 | UHRF1BP1        | 6  | 34792015  | 34883138  | protein_coding | 14,14 | 0 |
| ENSG00000112599 | GUCA1B          | 6  | 42184401  | 42194916  | protein_coding | 14,12 | 0 |
| ENSG00000148296 | SURF6           | 9  | 133328774 | 133336398 | protein_coding | 14,11 | 0 |
| ENSG00000175003 | SLC22A1         | 6  | 160121789 | 160158718 | protein_coding | 14,10 | 0 |
| ENSG00000154252 | GAL3ST2         | 2  | 241776825 | 241804208 | protein_coding | 14,10 | 0 |
| ENSG00000180616 | SSTR2           | 17 | 73165012  | 73176633  | protein_coding | 14,10 | 0 |
| ENSG00000197415 | VEPH1           | 3  | 157259742 | 157533619 | protein_coding | 14,08 | 0 |
| ENSG00000167136 | ENDOG           | 9  | 128818474 | 128822677 | protein_coding | 14,08 | 0 |
| ENSG00000157911 | PEX10           | 1  | 2403964   | 2413797   | protein_coding | 14,06 | 0 |
| ENSG00000115841 | RMDN2           | 2  | 37923187  | 38067142  | protein_coding | 14,05 | 0 |
| ENSG00000142687 | KIAA0319L       | 1  | 35433490  | 35557950  | protein_coding | 14,05 | 0 |
| ENSG00000173744 | AGFG1           | 2  | 227472152 | 227561214 | protein_coding | 14,03 | 0 |
| ENSG00000197724 | PHF2            | 9  | 93576407  | 93679587  | protein_coding | 14,03 | 0 |
| ENSG00000100564 | PIGH            | 14 | 67581955  | 67600287  | protein_coding | 14,02 | 0 |
| ENSG00000176783 | RUFY1           | 5  | 179550558 | 179610026 | protein_coding | 14,01 | 0 |
| ENSG00000118855 | MFSD1           | 3  | 158732198 | 158829719 | protein_coding | 14,00 | 0 |

|                 |                 |    |           |           |                |       |   |
|-----------------|-----------------|----|-----------|-----------|----------------|-------|---|
| ENSG00000129244 | ATP1B2          | 17 | 7646627   | 7657768   | protein_coding | 14,00 | 0 |
| ENSG00000122367 | LDB3            | 10 | 86668449  | 86736068  | protein_coding | 14,00 | 0 |
| ENSG00000124564 | SLC17A3         | 6  | 25833066  | 25882286  | protein_coding | 14,00 | 0 |
| ENSG00000007062 | PROM1           | 4  | 15963076  | 16084378  | protein_coding | 14,00 | 0 |
| ENSG00000163735 | CXCL5           | 4  | 73995642  | 73998779  | protein_coding | 14,00 | 0 |
| ENSG00000132031 | MATN3           | 2  | 19992111  | 20012694  | protein_coding | 14,00 | 0 |
| ENSG00000184599 | FAM19A3         | 1  | 112720419 | 112727235 | protein_coding | 14,00 | 0 |
| ENSG00000266028 | SRGAP2          | 1  | 206203345 | 206464443 | protein_coding | 14,00 | 0 |
| ENSG00000163444 | TMEM183A        | 1  | 203007386 | 203024848 | protein_coding | 14,00 | 0 |
| ENSG00000165912 | PACIN3          | 11 | 47177525  | 47186443  | protein_coding | 13,98 | 0 |
| ENSG00000162642 | C1orf52         | 1  | 85249953  | 85259672  | protein_coding | 13,98 | 0 |
| ENSG00000131876 | SNRPA1          | 15 | 101281510 | 101295282 | protein_coding | 13,96 | 0 |
| ENSG00000165671 | NSD1            | 5  | 177133025 | 177300215 | protein_coding | 13,96 | 0 |
| ENSG00000180817 | PPA1            | 10 | 70202830  | 70233911  | protein_coding | 13,95 | 0 |
| ENSG00000104228 | TRIM35          | 8  | 27284887  | 27311319  | protein_coding | 13,95 | 0 |
| ENSG00000139946 | PELI2           | 14 | 56117814  | 56301526  | protein_coding | 13,93 | 0 |
| ENSG00000173486 | FKBP2           | 11 | 64241003  | 64244132  | protein_coding | 13,92 | 0 |
| ENSG00000187741 | FANCA           | 16 | 89737549  | 89816657  | protein_coding | 13,91 | 0 |
| ENSG00000167483 | FAM129C         | 19 | 17523301  | 17553839  | protein_coding | 13,90 | 0 |
| ENSG00000260300 | ENSG00000260300 | 16 | 83908132  | 83951445  | protein_coding | 13,90 | 0 |
| ENSG00000243708 | PLA2G4B         | 15 | 41837775  | 41848147  | protein_coding | 13,90 | 0 |
| ENSG00000103222 | ABCC1           | 16 | 15949577  | 16143074  | protein_coding | 13,90 | 0 |
| ENSG00000089847 | ANKRD24         | 19 | 4183354   | 4224814   | protein_coding | 13,88 | 0 |
| ENSG00000149357 | LAMTOR1         | 11 | 72085895  | 72103387  | protein_coding | 13,88 | 0 |
| ENSG00000205060 | SLC35B4         | 7  | 134289332 | 134317051 | protein_coding | 13,87 | 0 |
| ENSG00000204991 | SPIRE2          | 16 | 89818179  | 89871319  | protein_coding | 13,86 | 0 |
| ENSG00000103707 | MTFMT           | 15 | 65001512  | 65029639  | protein_coding | 13,86 | 0 |
| ENSG00000217930 | PAM16           | 16 | 4331549   | 4355607   | protein_coding | 13,85 | 0 |
| ENSG00000108443 | RPS6KB1         | 17 | 59893046  | 59950564  | protein_coding | 13,85 | 0 |
| ENSG00000107165 | TYRP1           | 9  | 12685439  | 12710290  | protein_coding | 13,84 | 0 |
| ENSG00000149428 | HYOU1           | 11 | 119044189 | 119057202 | protein_coding | 13,84 | 0 |
| ENSG00000134323 | MYCN            | 2  | 15940564  | 15947007  | protein_coding | 13,83 | 0 |
| ENSG00000155850 | SLC26A2         | 5  | 149960737 | 149993455 | protein_coding | 13,83 | 0 |
| ENSG00000188191 | PRKAR1B         | 7  | 549197    | 727650    | protein_coding | 13,83 | 0 |
| ENSG00000062725 | APPBP2          | 17 | 60443149  | 60526219  | protein_coding | 13,81 | 0 |
| ENSG00000197020 | ZNF100          | 19 | 21722766  | 21767628  | protein_coding | 13,81 | 0 |
| ENSG00000277075 | HIST1H2AE       | 6  | 26216975  | 26217483  | protein_coding | 13,80 | 0 |
| ENSG00000170469 | SPATA24         | 5  | 139396563 | 139404088 | protein_coding | 13,80 | 0 |
| ENSG00000174348 | PODN            | 1  | 53062052  | 53085502  | protein_coding | 13,80 | 0 |
| ENSG00000115233 | PSMD14          | 2  | 161308038 | 161411717 | protein_coding | 13,80 | 0 |
| ENSG00000146963 | LUC7L2          | 7  | 139340359 | 139423457 | protein_coding | 13,79 | 0 |
| ENSG00000164180 | TMEM161B        | 5  | 88189633  | 88269476  | protein_coding | 13,77 | 0 |
| ENSG00000158882 | TOMM40L         | 1  | 161225939 | 161230744 | protein_coding | 13,76 | 0 |
| ENSG00000173889 | PHC3            | 3  | 170086732 | 170181749 | protein_coding | 13,76 | 0 |
| ENSG00000067829 | IDH3G           | X  | 153785766 | 153794523 | protein_coding | 13,76 | 0 |
| ENSG00000170291 | ELP5            | 17 | 7251416   | 7259940   | protein_coding | 13,75 | 0 |
| ENSG00000179833 | SERTAD2         | 2  | 64631621  | 64751005  | protein_coding | 13,74 | 0 |
| ENSG00000171368 | TPPP            | 5  | 659862    | 693395    | protein_coding | 13,74 | 0 |
| ENSG00000126106 | TMEM53          | 1  | 44635238  | 44674555  | protein_coding | 13,74 | 0 |
| ENSG00000130363 | RSPH3           | 6  | 158972871 | 159000187 | protein_coding | 13,74 | 0 |
| ENSG00000100813 | ACIN1           | 14 | 23058564  | 23095614  | protein_coding | 13,74 | 0 |
| ENSG00000166548 | TK2             | 16 | 66508003  | 66552544  | protein_coding | 13,73 | 0 |
| ENSG00000137337 | MDC1            | 6  | 30699807  | 30717889  | protein_coding | 13,73 | 0 |
| ENSG00000164054 | SHISA5          | 3  | 48467798  | 48504826  | protein_coding | 13,72 | 0 |
| ENSG00000089505 | CMTM1           | 16 | 66566393  | 66579137  | protein_coding | 13,70 | 0 |
| ENSG00000146530 | VWDE            | 7  | 12330885  | 12403941  | protein_coding | 13,70 | 0 |
| ENSG00000172757 | CFL1            | 11 | 65823022  | 65862026  | protein_coding | 13,68 | 0 |
| ENSG00000074621 | SLC24A1         | 15 | 65611366  | 65660995  | protein_coding | 13,68 | 0 |

|                  |          |    |           |           |                |       |   |
|------------------|----------|----|-----------|-----------|----------------|-------|---|
| ENSG00000198663  | C6orf89  | 6  | 36871870  | 36928964  | protein_coding | 13,67 | 0 |
| ENSG00000147394  | ZNF185   | X  | 152914442 | 152973480 | protein_coding | 13,65 | 0 |
| ENSG00000146729  | GBAS     | 7  | 55951793  | 56000181  | protein_coding | 13,64 | 0 |
| ENSG00000165983  | PTER     | 10 | 16436943  | 16513745  | protein_coding | 13,64 | 0 |
| ENSG00000110066  | SUV420H1 | 11 | 68154863  | 68213828  | protein_coding | 13,64 | 0 |
| ENSG00000111785  | RIC8B    | 12 | 106774595 | 106889316 | protein_coding | 13,63 | 0 |
| ENSG00000122477  | LRRC39   | 1  | 100148449 | 100178273 | protein_coding | 13,63 | 0 |
| ENSG00000122034  | GTF3A    | 13 | 27424544  | 27435823  | protein_coding | 13,63 | 0 |
| ENSG00000168710  | AHCYL1   | 1  | 109984686 | 110023741 | protein_coding | 13,62 | 0 |
| ENSG00000167103  | PIP5K1   | 9  | 127920879 | 127930797 | protein_coding | 13,62 | 0 |
| ENSG00000178980  | SEPW1    | 19 | 47778572  | 47784686  | protein_coding | 13,62 | 0 |
| ENSG00000110013  | SIAE     | 11 | 124633113 | 124695707 | protein_coding | 13,60 | 0 |
| ENSG00000152137  | HSPB8    | 12 | 119178642 | 119221131 | protein_coding | 13,60 | 0 |
| ENSG00000152779  | SLC16A12 | 10 | 89430299  | 89556641  | protein_coding | 13,60 | 0 |
| ENSG00000142765  | SYTL1    | 1  | 27342020  | 27353937  | protein_coding | 13,60 | 0 |
| ENSG00000114126  | TFDP2    | 3  | 141944428 | 142149544 | protein_coding | 13,60 | 0 |
| ENSG00000047188  | YTHDC2   | 5  | 113513683 | 113595285 | protein_coding | 13,60 | 0 |
| ENSG00000185104  | FAF1     | 1  | 50437028  | 50960263  | protein_coding | 13,59 | 0 |
| ENSG00000025156  | HSF2     | 6  | 122399546 | 122433119 | protein_coding | 13,58 | 0 |
| ENSG00000114491  | UMPS     | 3  | 124730366 | 124749273 | protein_coding | 13,57 | 0 |
| ENSG00000174839  | DENND6A  | 3  | 57625457  | 57693089  | protein_coding | 13,57 | 0 |
| ENSG00000128274  | A4GALT   | 22 | 42692121  | 42721298  | protein_coding | 13,57 | 0 |
| ENSG00000103381  | CPPED1   | 16 | 12659799  | 12804017  | protein_coding | 13,56 | 0 |
| ENSG00000169297  | NR0B1    | X  | 30304206  | 30309598  | protein_coding | 13,55 | 0 |
| ENSG00000105655  | ISYNA1   | 19 | 18434388  | 18438301  | protein_coding | 13,54 | 0 |
| ENSG000000274180 | NATD1    | 17 | 21238870  | 21253410  | protein_coding | 13,53 | 0 |
| ENSG000000259494 | MRPL46   | 15 | 88459476  | 88467419  | protein_coding | 13,53 | 0 |
| ENSG00000133706  | LARS     | 5  | 146113038 | 146182660 | protein_coding | 13,52 | 0 |
| ENSG00000185250  | PPIL6    | 6  | 109390215 | 109441171 | protein_coding | 13,52 | 0 |
| ENSG00000071991  | CDH19    | 18 | 66501083  | 66604138  | protein_coding | 13,50 | 0 |
| ENSG00000006210  | CX3CL1   | 16 | 57372458  | 57385048  | protein_coding | 13,50 | 0 |
| ENSG00000175538  | KCNE3    | 11 | 74454841  | 74467729  | protein_coding | 13,50 | 0 |
| ENSG00000143199  | ADCY10   | 1  | 167809388 | 167914215 | protein_coding | 13,50 | 0 |
| ENSG00000129933  | MAU2     | 19 | 19320681  | 19358755  | protein_coding | 13,50 | 0 |
| ENSG00000166446  | CDYL2    | 16 | 80597906  | 80804329  | protein_coding | 13,49 | 0 |
| ENSG00000136381  | IREB2    | 15 | 78437431  | 78501456  | protein_coding | 13,48 | 0 |
| ENSG00000167971  | CASKIN1  | 16 | 2177180   | 2196525   | protein_coding | 13,48 | 0 |
| ENSG00000105835  | NAMPT    | 7  | 106248285 | 106286326 | protein_coding | 13,43 | 0 |
| ENSG00000139718  | SETD1B   | 12 | 121804180 | 121832584 | protein_coding | 13,43 | 0 |
| ENSG00000088876  | ZNF343   | 20 | 2481817   | 2524702   | protein_coding | 13,42 | 0 |
| ENSG00000139194  | RBP5     | 12 | 7123684   | 7128942   | protein_coding | 13,41 | 0 |
| ENSG00000158528  | PPP1R9A  | 7  | 94907202  | 95296415  | protein_coding | 13,40 | 0 |
| ENSG00000175893  | ZDHHC21  | 9  | 14611071  | 14693471  | protein_coding | 13,39 | 0 |
| ENSG00000141556  | TBCD     | 17 | 82752064  | 82945922  | protein_coding | 13,36 | 0 |
| ENSG00000128591  | FLNC     | 7  | 128830377 | 128859274 | protein_coding | 13,36 | 0 |
| ENSG00000100220  | RTCB     | 22 | 32387582  | 32412255  | protein_coding | 13,34 | 0 |
| ENSG00000186660  | ZFP91    | 11 | 58579111  | 58621042  | protein_coding | 13,32 | 0 |
| ENSG00000132434  | LANCL2   | 7  | 55365448  | 55433742  | protein_coding | 13,31 | 0 |
| ENSG00000145016  | RUBCN    | 3  | 197671393 | 197749727 | protein_coding | 13,30 | 0 |
| ENSG00000107745  | MICU1    | 10 | 72367327  | 72626191  | protein_coding | 13,30 | 0 |
| ENSG00000096968  | JAK2     | 9  | 4985033   | 5128183   | protein_coding | 13,30 | 0 |
| ENSG00000137936  | BCAR3    | 1  | 93561786  | 93847150  | protein_coding | 13,30 | 0 |
| ENSG00000236279  | CLEC2L   | 7  | 139523856 | 139544984 | protein_coding | 13,30 | 0 |
| ENSG00000173200  | PARP15   | 3  | 122577602 | 122639047 | protein_coding | 13,30 | 0 |
| ENSG00000182986  | ZNF320   | 19 | 52863790  | 52897693  | protein_coding | 13,30 | 0 |
| ENSG00000100865  | CINP     | 14 | 102341102 | 102362916 | protein_coding | 13,28 | 0 |
| ENSG00000074582  | BCS1L    | 2  | 218658764 | 218663443 | protein_coding | 13,28 | 0 |
| ENSG00000132763  | MMACHC   | 1  | 45500053  | 45513382  | protein_coding | 13,28 | 0 |

|                 |          |    |           |           |                |       |   |
|-----------------|----------|----|-----------|-----------|----------------|-------|---|
| ENSG00000174652 | ZNF266   | 19 | 9412598   | 9435578   | protein_coding | 13,27 | 0 |
| ENSG00000131374 | TBC1D5   | 3  | 17157162  | 18444817  | protein_coding | 13,27 | 0 |
| ENSG00000107077 | KDM4C    | 9  | 6757641   | 7175648   | protein_coding | 13,26 | 0 |
| ENSG00000112200 | ZNF451   | 6  | 57086844  | 57170307  | protein_coding | 13,26 | 0 |
| ENSG00000184939 | ZFP90    | 16 | 68530090  | 68576072  | protein_coding | 13,26 | 0 |
| ENSG00000102393 | GLA      | X  | 101397803 | 101407925 | protein_coding | 13,25 | 0 |
| ENSG00000136802 | LRRRC8A  | 9  | 128882112 | 128918039 | protein_coding | 13,24 | 0 |
| ENSG00000100532 | CGRRF1   | 14 | 54509812  | 54539309  | protein_coding | 13,23 | 0 |
| ENSG00000143252 | SDHC     | 1  | 161314257 | 161375340 | protein_coding | 13,22 | 0 |
| ENSG00000128185 | DGCR6L   | 22 | 20314276  | 20320080  | protein_coding | 13,22 | 0 |
| ENSG00000115415 | STAT1    | 2  | 190964358 | 191020960 | protein_coding | 13,22 | 0 |
| ENSG00000077232 | DNAJC10  | 2  | 182716041 | 182794464 | protein_coding | 13,21 | 0 |
| ENSG00000111445 | RFC5     | 12 | 118013588 | 118033130 | protein_coding | 13,21 | 0 |
| ENSG00000111181 | SLC6A12  | 12 | 190077    | 214570    | protein_coding | 13,20 | 0 |
| ENSG00000110169 | HPX      | 11 | 6431049   | 6442617   | protein_coding | 13,20 | 0 |
| ENSG00000110665 | C11orf21 | 11 | 2295645   | 2303049   | protein_coding | 13,20 | 0 |
| ENSG00000222047 | C10orf55 | 10 | 73909969  | 73922777  | protein_coding | 13,20 | 0 |
| ENSG00000244067 | GSTA2    | 6  | 52750089  | 52763569  | protein_coding | 13,20 | 0 |
| ENSG00000146054 | TRIM7    | 5  | 181193924 | 181205293 | protein_coding | 13,20 | 0 |
| ENSG00000280789 | PAGR1    | 16 | 29815952  | 29820117  | protein_coding | 13,18 | 0 |
| ENSG00000166263 | STXBP4   | 17 | 54968727  | 55173632  | protein_coding | 13,17 | 0 |
| ENSG00000150471 | ADGRL3   | 4  | 61201258  | 62078335  | protein_coding | 13,16 | 0 |
| ENSG00000162227 | TAF6L    | 11 | 62771303  | 62787342  | protein_coding | 13,16 | 0 |
| ENSG00000111328 | CDK2AP1  | 12 | 123260971 | 123272334 | protein_coding | 13,16 | 0 |
| ENSG00000186063 | AIDA     | 1  | 222668013 | 222713210 | protein_coding | 13,15 | 0 |
| ENSG00000133612 | AGAP3    | 7  | 151085831 | 151144436 | protein_coding | 13,15 | 0 |
| ENSG00000175221 | MED16    | 19 | 867630    | 893218    | protein_coding | 13,15 | 0 |
| ENSG00000105426 | PTPRS    | 19 | 5158495   | 5340803   | protein_coding | 13,14 | 0 |
| ENSG00000072786 | STK10    | 5  | 172042073 | 172188386 | protein_coding | 13,12 | 0 |
| ENSG00000101017 | CD40     | 20 | 46118272  | 46129863  | protein_coding | 13,12 | 0 |
| ENSG00000166507 | NDST2    | 10 | 73801911  | 73811798  | protein_coding | 13,10 | 0 |
| ENSG00000137500 | CCDC90B  | 11 | 83259097  | 83286407  | protein_coding | 13,10 | 0 |
| ENSG00000163093 | BBS5     | 2  | 169479178 | 169506655 | protein_coding | 13,08 | 0 |
| ENSG00000185800 | DMWD     | 19 | 45782947  | 45792802  | protein_coding | 13,07 | 0 |
| ENSG00000168090 | COPS6    | 7  | 100088954 | 100092200 | protein_coding | 13,06 | 0 |
| ENSG00000198732 | SMOC1    | 14 | 69854131  | 70032366  | protein_coding | 13,06 | 0 |
| ENSG00000112146 | FBXO9    | 6  | 53051991  | 53100873  | protein_coding | 13,06 | 0 |
| ENSG00000175787 | ZNF169   | 9  | 94259311  | 94301454  | protein_coding | 13,06 | 0 |
| ENSG00000110395 | CBL      | 11 | 119206276 | 119308149 | protein_coding | 13,05 | 0 |
| ENSG00000155755 | TMEM237  | 2  | 201620184 | 201643570 | protein_coding | 13,04 | 0 |
| ENSG00000170502 | NUDT9    | 4  | 87422582  | 87459454  | protein_coding | 13,02 | 0 |
| ENSG00000146463 | ZMYM4    | 1  | 35268967  | 35422058  | protein_coding | 13,00 | 0 |
| ENSG00000139572 | GPR84    | 12 | 54362445  | 54364487  | protein_coding | 13,00 | 0 |
| ENSG00000178199 | ZC3H12D  | 6  | 149446795 | 149485061 | protein_coding | 13,00 | 0 |
| ENSG00000213397 | HAUS7    | X  | 153447666 | 153495516 | protein_coding | 13,00 | 0 |
| ENSG00000148737 | TCF7L2   | 10 | 112950250 | 113167678 | protein_coding | 12,99 | 0 |
| ENSG00000197375 | SLC22A5  | 5  | 132369752 | 132395614 | protein_coding | 12,99 | 0 |
| ENSG00000177192 | PUS1     | 12 | 131929200 | 131945896 | protein_coding | 12,97 | 0 |
| ENSG00000168003 | SLC3A2   | 11 | 62856102  | 62888875  | protein_coding | 12,95 | 0 |
| ENSG00000111300 | NAA25    | 12 | 112026689 | 112109022 | protein_coding | 12,94 | 0 |
| ENSG00000125779 | PANK2    | 20 | 3888839   | 3929882   | protein_coding | 12,94 | 0 |
| ENSG00000129353 | SLC44A2  | 19 | 10602457  | 10644559  | protein_coding | 12,94 | 0 |
| ENSG00000119965 | C10orf88 | 10 | 122930903 | 122954403 | protein_coding | 12,94 | 0 |
| ENSG00000162804 | SNED1    | 2  | 240998838 | 241095568 | protein_coding | 12,93 | 0 |
| ENSG00000105323 | HNRNPUL1 | 19 | 41262496  | 41307598  | protein_coding | 12,92 | 0 |
| ENSG00000104983 | CCDC61   | 19 | 45995461  | 46021318  | protein_coding | 12,92 | 0 |
| ENSG00000142444 | C19orf52 | 19 | 10928733  | 10933535  | protein_coding | 12,91 | 0 |
| ENSG00000138018 | EPT1     | 2  | 26308547  | 26395891  | protein_coding | 12,90 | 0 |

|                 |          |    |           |           |                |       |   |
|-----------------|----------|----|-----------|-----------|----------------|-------|---|
| ENSG00000145428 | RNF175   | 4  | 153710125 | 153760235 | protein_coding | 12,90 | 0 |
| ENSG00000178104 | PDE4DIP  | 1  | 148808181 | 149048286 | protein_coding | 12,88 | 0 |
| ENSG00000113732 | ATP6V0E1 | 5  | 172983757 | 173035445 | protein_coding | 12,86 | 0 |
| ENSG00000188021 | UBQLN2   | X  | 56563639  | 56567868  | protein_coding | 12,86 | 0 |
| ENSG00000147535 | PLPP5    | 8  | 38263130  | 38269243  | protein_coding | 12,85 | 0 |
| ENSG00000134780 | DAGLA    | 11 | 61680433  | 61747001  | protein_coding | 12,84 | 0 |
| ENSG00000160410 | SHKBP1   | 19 | 40576851  | 40591399  | protein_coding | 12,83 | 0 |
| ENSG00000171206 | TRIM8    | 10 | 102644496 | 102658407 | protein_coding | 12,83 | 0 |
| ENSG00000100031 | GGT1     | 22 | 24583750  | 24629005  | protein_coding | 12,82 | 0 |
| ENSG00000172500 | FIBP     | 11 | 65883741  | 65888539  | protein_coding | 12,82 | 0 |
| ENSG00000170185 | USP38    | 4  | 143184917 | 143223830 | protein_coding | 12,81 | 0 |
| ENSG00000187024 | PTRH1    | 9  | 127692978 | 127724873 | protein_coding | 12,80 | 0 |
| ENSG00000090612 | ZNF268   | 12 | 133181409 | 133214831 | protein_coding | 12,80 | 0 |
| ENSG00000186523 | FAM86B1  | 8  | 12182096  | 12194133  | protein_coding | 12,80 | 0 |
| ENSG00000015676 | NUDCD3   | 7  | 44379121  | 44490880  | protein_coding | 12,80 | 0 |
| ENSG00000086589 | RBM22    | 5  | 150690794 | 150701107 | protein_coding | 12,78 | 0 |
| ENSG00000159214 | CCDC24   | 1  | 43991359  | 43996528  | protein_coding | 12,78 | 0 |
| ENSG00000196655 | TRAPPC4  | 11 | 119018432 | 119025454 | protein_coding | 12,78 | 0 |
| ENSG00000196776 | CD47     | 3  | 108043298 | 108091025 | protein_coding | 12,77 | 0 |
| ENSG00000125775 | SDCBP2   | 20 | 1309909   | 1329239   | protein_coding | 12,76 | 0 |
| ENSG00000110429 | FBXO3    | 11 | 33740939  | 33774543  | protein_coding | 12,76 | 0 |
| ENSG00000116478 | HDAC1    | 1  | 32292086  | 32333635  | protein_coding | 12,76 | 0 |
| ENSG00000183978 | COA3     | 17 | 42795147  | 42798704  | protein_coding | 12,74 | 0 |
| ENSG00000187144 | SPATA21  | 1  | 16387117  | 16437424  | protein_coding | 12,72 | 0 |
| ENSG00000141367 | CLTC     | 17 | 59619689  | 59696956  | protein_coding | 12,71 | 0 |
| ENSG00000104903 | LYL1     | 19 | 13099033  | 13103161  | protein_coding | 12,70 | 0 |
| ENSG00000168356 | SCN11A   | 3  | 38845769  | 38950561  | protein_coding | 12,70 | 0 |
| ENSG00000148290 | SURF1    | 9  | 133351755 | 133356676 | protein_coding | 12,70 | 0 |
| ENSG00000148541 | FAM13C   | 10 | 59246129  | 59363181  | protein_coding | 12,69 | 0 |
| ENSG00000183864 | TOB2     | 22 | 41433492  | 41447023  | protein_coding | 12,69 | 0 |
| ENSG00000140350 | ANP32A   | 15 | 68778535  | 68820897  | protein_coding | 12,68 | 0 |
| ENSG00000100767 | PAPLN    | 14 | 73237497  | 73274640  | protein_coding | 12,68 | 0 |
| ENSG00000206052 | DOK6     | 18 | 69401055  | 69849087  | protein_coding | 12,67 | 0 |
| ENSG00000186193 | SAPCD2   | 9  | 137062124 | 137070588 | protein_coding | 12,67 | 0 |
| ENSG00000137265 | IRF4     | 6  | 391739    | 411447    | protein_coding | 12,67 | 0 |
| ENSG00000167100 | SAMD14   | 17 | 50110040  | 50129882  | protein_coding | 12,66 | 0 |
| ENSG00000146232 | NFKBIE   | 6  | 44258166  | 44265788  | protein_coding | 12,65 | 0 |
| ENSG00000115053 | NCL      | 2  | 231453531 | 231483641 | protein_coding | 12,65 | 0 |
| ENSG00000167257 | RNF214   | 11 | 117232625 | 117286445 | protein_coding | 12,64 | 0 |
| ENSG00000197859 | ADAMTSL2 | 9  | 133532164 | 133575519 | protein_coding | 12,64 | 0 |
| ENSG00000196236 | XPNPEP3  | 22 | 40857077  | 40932815  | protein_coding | 12,64 | 0 |
| ENSG00000164830 | OXR1     | 8  | 106270178 | 106752694 | protein_coding | 12,63 | 0 |
| ENSG00000127445 | PIN1     | 19 | 9835257   | 9849682   | protein_coding | 12,63 | 0 |
| ENSG00000130165 | ELOF1    | 19 | 11551147  | 11559236  | protein_coding | 12,62 | 0 |
| ENSG00000172531 | PPP1CA   | 11 | 67398183  | 67421183  | protein_coding | 12,61 | 0 |
| ENSG00000125877 | ITPA     | 20 | 3208868   | 3223870   | protein_coding | 12,60 | 0 |
| ENSG00000105063 | PPP6R1   | 19 | 55229780  | 55258995  | protein_coding | 12,60 | 0 |
| ENSG00000161405 | IKZF3    | 17 | 39757715  | 39864188  | protein_coding | 12,60 | 0 |
| ENSG00000103043 | VAC14    | 16 | 70687439  | 70801161  | protein_coding | 12,60 | 0 |
| ENSG00000043462 | LCP2     | 5  | 170246237 | 170298227 | protein_coding | 12,59 | 0 |
| ENSG00000138434 | SSFA2    | 2  | 181891833 | 181930738 | protein_coding | 12,58 | 0 |
| ENSG00000174238 | PITPNA   | 17 | 1517718   | 1562816   | protein_coding | 12,58 | 0 |
| ENSG00000172346 | CSDC2    | 22 | 41560763  | 41577741  | protein_coding | 12,58 | 0 |
| ENSG00000116141 | MARK1    | 1  | 220528183 | 220664461 | protein_coding | 12,58 | 0 |
| ENSG00000104960 | PTOV1    | 19 | 49850735  | 49860744  | protein_coding | 12,57 | 0 |
| ENSG00000171345 | KRT19    | 17 | 41523617  | 41528308  | protein_coding | 12,57 | 0 |
| ENSG00000088826 | SMOX     | 20 | 4120980   | 4187747   | protein_coding | 12,56 | 0 |
| ENSG00000145113 | MUC4     | 3  | 195746765 | 195812277 | protein_coding | 12,56 | 0 |

|                 |            |    |           |           |                |       |   |
|-----------------|------------|----|-----------|-----------|----------------|-------|---|
| ENSG00000159239 | C2orf81    | 2  | 74414176  | 74421591  | protein_coding | 12,55 | 0 |
| ENSG00000135749 | PCNXL2     | 1  | 232983435 | 233295713 | protein_coding | 12,54 | 0 |
| ENSG00000197619 | ZNF615     | 19 | 51991332  | 52008230  | protein_coding | 12,53 | 0 |
| ENSG00000141378 | PTRH2      | 17 | 59674636  | 59707626  | protein_coding | 12,52 | 0 |
| ENSG00000170638 | TRABD      | 22 | 50185915  | 50199598  | protein_coding | 12,51 | 0 |
| ENSG00000182584 | ACTL10     | 20 | 33666498  | 33668525  | protein_coding | 12,50 | 0 |
| ENSG00000161682 | FAM171A2   | 17 | 44353215  | 44363875  | protein_coding | 12,50 | 0 |
| ENSG00000039537 | C6         | 5  | 41142234  | 41261438  | protein_coding | 12,50 | 0 |
| ENSG00000163606 | CD200R1    | 3  | 112921209 | 112975122 | protein_coding | 12,50 | 0 |
| ENSG00000181036 | FCRL6      | 1  | 159800511 | 159816251 | protein_coding | 12,50 | 0 |
| ENSG00000076242 | MLH1       | 3  | 36993332  | 37050918  | protein_coding | 12,50 | 0 |
| ENSG00000162337 | LRP5       | 11 | 68312609  | 68449275  | protein_coding | 12,50 | 0 |
| ENSG00000120549 | KIAA1217   | 10 | 23694746  | 24547848  | protein_coding | 12,49 | 0 |
| ENSG00000275993 | ENSG000002 | 21 | 6111134   | 6123739   | protein_coding | 12,49 | 0 |
| ENSG00000167721 | TSR1       | 17 | 2322503   | 2337507   | protein_coding | 12,48 | 0 |
| ENSG00000115446 | UNC50      | 2  | 98608579  | 98618515  | protein_coding | 12,47 | 0 |
| ENSG00000134440 | NARS       | 18 | 57600656  | 57622213  | protein_coding | 12,46 | 0 |
| ENSG00000144840 | RABL3      | 3  | 120686681 | 120742993 | protein_coding | 12,46 | 0 |
| ENSG00000196605 | ZNF846     | 19 | 9751993   | 9793180   | protein_coding | 12,46 | 0 |
| ENSG00000067596 | DHX8       | 17 | 43483865  | 43544463  | protein_coding | 12,46 | 0 |
| ENSG00000047578 | KIAA0556   | 16 | 27550133  | 27780369  | protein_coding | 12,45 | 0 |
| ENSG00000136425 | CIB2       | 15 | 78104606  | 78131544  | protein_coding | 12,44 | 0 |
| ENSG00000159086 | PAXBP1     | 21 | 32733899  | 32771858  | protein_coding | 12,43 | 0 |
| ENSG00000100485 | SOS2       | 14 | 50117120  | 50231558  | protein_coding | 12,42 | 0 |
| ENSG00000007047 | MARK4      | 19 | 45079288  | 45305283  | protein_coding | 12,42 | 0 |
| ENSG00000169136 | ATF5       | 19 | 49928702  | 49933935  | protein_coding | 12,42 | 0 |
| ENSG00000204619 | PPP1R11    | 6  | 30066709  | 30070333  | protein_coding | 12,41 | 0 |
| ENSG00000103852 | TTC23      | 15 | 99136323  | 99251223  | protein_coding | 12,41 | 0 |
| ENSG00000149634 | SPATA25    | 20 | 45886489  | 45887635  | protein_coding | 12,40 | 0 |
| ENSG00000167759 | KLK13      | 19 | 51056206  | 51065114  | protein_coding | 12,40 | 0 |
| ENSG00000250120 | PCDHA10    | 5  | 140855883 | 141012344 | protein_coding | 12,40 | 0 |
| ENSG00000081051 | AFP        | 4  | 73431138  | 73456174  | protein_coding | 12,40 | 0 |
| ENSG00000072694 | FCGR2B     | 1  | 161663147 | 161678654 | protein_coding | 12,40 | 0 |
| ENSG00000173714 | WFIKKN2    | 17 | 50834650  | 50842348  | protein_coding | 12,40 | 0 |
| ENSG00000141519 | CCDC40     | 17 | 80036632  | 80100613  | protein_coding | 12,39 | 0 |
| ENSG00000163682 | RPL9       | 4  | 39454124  | 39458948  | protein_coding | 12,39 | 0 |
| ENSG00000101126 | ADNP       | 20 | 50888919  | 50931240  | protein_coding | 12,39 | 0 |
| ENSG00000171155 | C1GALT1C1  | X  | 120625793 | 120630150 | protein_coding | 12,38 | 0 |
| ENSG00000188283 | ZNF383     | 19 | 37217926  | 37248738  | protein_coding | 12,38 | 0 |
| ENSG00000179979 | CRIPAK     | 4  | 1391552   | 1395989   | protein_coding | 12,37 | 0 |
| ENSG00000167723 | TRPV3      | 17 | 3510502   | 3557995   | protein_coding | 12,37 | 0 |
| ENSG00000157992 | KRTCAP3    | 2  | 27442366  | 27446481  | protein_coding | 12,37 | 0 |
| ENSG00000124733 | MEA1       | 6  | 43012094  | 43013968  | protein_coding | 12,36 | 0 |
| ENSG00000160688 | FLAD1      | 1  | 154983338 | 154993111 | protein_coding | 12,34 | 0 |
| ENSG00000188820 | FAM26F     | 6  | 116461370 | 116463779 | protein_coding | 12,33 | 0 |
| ENSG00000115486 | GGCX       | 2  | 85544723  | 85561547  | protein_coding | 12,33 | 0 |
| ENSG00000168743 | NPNT       | 4  | 105894775 | 106004027 | protein_coding | 12,33 | 0 |
| ENSG00000156304 | SCAF4      | 21 | 31671033  | 31732075  | protein_coding | 12,32 | 0 |
| ENSG00000176148 | TCP11L1    | 11 | 33039417  | 33105943  | protein_coding | 12,31 | 0 |
| ENSG00000253309 | SERPINE3   | 13 | 51335773  | 51364735  | protein_coding | 12,31 | 0 |
| ENSG00000044574 | HSPA5      | 9  | 125234853 | 125241330 | protein_coding | 12,30 | 0 |
| ENSG00000124743 | KLHL31     | 6  | 53647901  | 53665708  | protein_coding | 12,30 | 0 |
| ENSG00000134326 | CMPK2      | 2  | 6840570   | 6866635   | protein_coding | 12,30 | 0 |
| ENSG00000271092 | TMEM56-RV  | 1  | 95117923  | 95247225  | protein_coding | 12,30 | 0 |
| ENSG00000125675 | GRIA3      | X  | 123184153 | 123490915 | protein_coding | 12,30 | 0 |
| ENSG00000111215 | PRR4       | 12 | 10845849  | 11171613  | protein_coding | 12,29 | 0 |
| ENSG00000106853 | PTGR1      | 9  | 111549722 | 111599855 | protein_coding | 12,29 | 0 |
| ENSG00000135778 | NTPCR      | 1  | 232950605 | 232983882 | protein_coding | 12,28 | 0 |

|                 |          |    |           |           |                |       |   |
|-----------------|----------|----|-----------|-----------|----------------|-------|---|
| ENSG00000108861 | DUSP3    | 17 | 43766121  | 43778988  | protein_coding | 12,27 | 0 |
| ENSG00000097021 | ACOT7    | 1  | 6264269   | 6394391   | protein_coding | 12,27 | 0 |
| ENSG00000042429 | MED17    | 11 | 93784227  | 93814695  | protein_coding | 12,27 | 0 |
| ENSG00000167861 | HID1     | 17 | 74950743  | 74973166  | protein_coding | 12,26 | 0 |
| ENSG00000145780 | FEM1C    | 5  | 115520908 | 115544894 | protein_coding | 12,26 | 0 |
| ENSG00000067208 | EVI5     | 1  | 92508696  | 92792404  | protein_coding | 12,24 | 0 |
| ENSG00000149792 | MRPL49   | 11 | 65122183  | 65127371  | protein_coding | 12,24 | 0 |
| ENSG00000114670 | NEK11    | 3  | 131026850 | 131350465 | protein_coding | 12,23 | 0 |
| ENSG00000112851 | ERBB2IP  | 5  | 65926475  | 66082549  | protein_coding | 12,22 | 0 |
| ENSG00000256087 | ZNF432   | 19 | 52031379  | 52095738  | protein_coding | 12,21 | 0 |
| ENSG00000166337 | TAF10    | 11 | 6606296   | 6612667   | protein_coding | 12,21 | 0 |
| ENSG00000165837 | ERICH6B  | 13 | 45534522  | 45615739  | protein_coding | 12,20 | 0 |
| ENSG00000185305 | ARL15    | 5  | 53883945  | 54310582  | protein_coding | 12,20 | 0 |
| ENSG00000133488 | SEC14L4  | 22 | 30488913  | 30505711  | protein_coding | 12,20 | 0 |
| ENSG00000121552 | CSTA     | 3  | 122325244 | 122341972 | protein_coding | 12,20 | 0 |
| ENSG00000169951 | ZNF764   | 16 | 30553764  | 30558498  | protein_coding | 12,19 | 0 |
| ENSG00000138757 | G3BP2    | 4  | 75642782  | 75724525  | protein_coding | 12,19 | 0 |
| ENSG00000180979 | LRRC57   | 15 | 42537820  | 42548802  | protein_coding | 12,19 | 0 |
| ENSG00000155868 | MED7     | 5  | 157137412 | 157159019 | protein_coding | 12,18 | 0 |
| ENSG00000130477 | UNC13A   | 19 | 17601328  | 17688365  | protein_coding | 12,17 | 0 |
| ENSG00000182287 | AP1S2    | X  | 15825806  | 15855014  | protein_coding | 12,17 | 0 |
| ENSG00000132912 | DCTN4    | 5  | 150708440 | 150759109 | protein_coding | 12,16 | 0 |
| ENSG00000164024 | METAP1   | 4  | 98995620  | 99062813  | protein_coding | 12,16 | 0 |
| ENSG00000198466 | ZNF587   | 19 | 57849857  | 57865112  | protein_coding | 12,15 | 0 |
| ENSG00000226479 | TMEM185B | 2  | 120221278 | 120223408 | protein_coding | 12,12 | 0 |
| ENSG00000083520 | DIS3     | 13 | 72752169  | 72782096  | protein_coding | 12,12 | 0 |
| ENSG00000136144 | RCBTB1   | 13 | 49531946  | 49585583  | protein_coding | 12,11 | 0 |
| ENSG00000073921 | PICALM   | 11 | 85957684  | 86069882  | protein_coding | 12,11 | 0 |
| ENSG00000166869 | CHP2     | 16 | 23754627  | 23758951  | protein_coding | 12,10 | 0 |
| ENSG00000123643 | SLC36A1  | 5  | 151437046 | 151492381 | protein_coding | 12,09 | 0 |
| ENSG00000117305 | HMGCL    | 1  | 23801885  | 23838620  | protein_coding | 12,09 | 0 |
| ENSG00000156398 | SFXN2    | 10 | 102714538 | 102743492 | protein_coding | 12,08 | 0 |
| ENSG00000107372 | ZFAND5   | 9  | 72351425  | 72365235  | protein_coding | 12,08 | 0 |
| ENSG00000106246 | PTCD1    | 7  | 99416739  | 99466163  | protein_coding | 12,07 | 0 |
| ENSG00000204371 | EHMT2    | 6  | 31879759  | 31897687  | protein_coding | 12,07 | 0 |
| ENSG00000107815 | C10orf2  | 10 | 100987367 | 100994401 | protein_coding | 12,06 | 0 |
| ENSG00000157107 | FCHO2    | 5  | 72955981  | 73090522  | protein_coding | 12,06 | 0 |
| ENSG00000039319 | ZFYVE16  | 5  | 80408013  | 80479350  | protein_coding | 12,05 | 0 |
| ENSG00000157181 | C1orf27  | 1  | 186375838 | 186421378 | protein_coding | 12,04 | 0 |
| ENSG00000153487 | ING1     | 13 | 110712736 | 110723339 | protein_coding | 12,02 | 0 |
| ENSG00000013523 | ANGEL1   | 14 | 76786178  | 76826246  | protein_coding | 12,01 | 0 |
| ENSG00000172115 | CYCS     | 7  | 25120091  | 25125361  | protein_coding | 12,00 | 0 |
| ENSG00000268182 | SMIM17   | 19 | 56643145  | 56655766  | protein_coding | 12,00 | 0 |
| ENSG00000059377 | TBXAS1   | 7  | 139777051 | 140020325 | protein_coding | 12,00 | 0 |
| ENSG00000015171 | ZMYND11  | 10 | 134465    | 254637    | protein_coding | 12,00 | 0 |
| ENSG00000162520 | SYNC     | 1  | 32680360  | 32703596  | protein_coding | 11,99 | 0 |
| ENSG00000167645 | YIF1B    | 19 | 38305104  | 38317273  | protein_coding | 11,99 | 0 |
| ENSG00000154832 | CXXC1    | 18 | 50282343  | 50288304  | protein_coding | 11,98 | 0 |
| ENSG00000136235 | GPNMB    | 7  | 23235967  | 23275108  | protein_coding | 11,98 | 0 |
| ENSG00000117115 | PADI2    | 1  | 17066761  | 17119435  | protein_coding | 11,97 | 0 |
| ENSG00000087191 | PSMC5    | 17 | 63827152  | 63832026  | protein_coding | 11,96 | 0 |
| ENSG00000116251 | RPL22    | 1  | 6181269   | 6209389   | protein_coding | 11,96 | 0 |
| ENSG00000135723 | FHOD1    | 16 | 67229387  | 67247658  | protein_coding | 11,96 | 0 |
| ENSG00000163320 | CGGBP1   | 3  | 88051944  | 88149885  | protein_coding | 11,95 | 0 |
| ENSG00000106144 | CASP2    | 7  | 143288215 | 143307696 | protein_coding | 11,95 | 0 |
| ENSG00000140521 | POLG     | 15 | 89316305  | 89334861  | protein_coding | 11,95 | 0 |
| ENSG00000155961 | RAB39B   | X  | 155258241 | 155264589 | protein_coding | 11,94 | 0 |
| ENSG00000117448 | AKR1A1   | 1  | 45550543  | 45570049  | protein_coding | 11,94 | 0 |



|                 |                 |    |           |           |                |       |   |
|-----------------|-----------------|----|-----------|-----------|----------------|-------|---|
| ENSG00000119862 | LGALS1          | 2  | 64453969  | 64461381  | protein_coding | 11,93 | 0 |
| ENSG00000075643 | MOCOS           | 18 | 36187519  | 36272157  | protein_coding | 11,93 | 0 |
| ENSG00000166140 | ZFYVE19         | 15 | 40807086  | 40815084  | protein_coding | 11,93 | 0 |
| ENSG00000276644 | DACH1           | 13 | 71437966  | 71867192  | protein_coding | 11,93 | 0 |
| ENSG00000104679 | R3HCC1          | 8  | 23270120  | 23296279  | protein_coding | 11,93 | 0 |
| ENSG00000125731 | SH2D3A          | 19 | 6752160   | 6767588   | protein_coding | 11,92 | 0 |
| ENSG00000204519 | ZNF551          | 19 | 57681969  | 57717301  | protein_coding | 11,92 | 0 |
| ENSG00000169432 | SCN9A           | 2  | 166195185 | 166375993 | protein_coding | 11,91 | 0 |
| ENSG00000116560 | SFPQ            | 1  | 35176378  | 35193148  | protein_coding | 11,91 | 0 |
| ENSG00000170382 | LRRN2           | 1  | 204617170 | 204685733 | protein_coding | 11,90 | 0 |
| ENSG00000004777 | ARHGAP33        | 19 | 35774532  | 35788822  | protein_coding | 11,90 | 0 |
| ENSG00000117533 | VAMP4           | 1  | 171700160 | 171742247 | protein_coding | 11,88 | 0 |
| ENSG00000159915 | ZNF233          | 19 | 44259880  | 44275317  | protein_coding | 11,88 | 0 |
| ENSG00000164040 | PGRMC2          | 4  | 128269237 | 128288829 | protein_coding | 11,87 | 0 |
| ENSG00000110172 | CHORDC1         | 11 | 90201160  | 90223364  | protein_coding | 11,86 | 0 |
| ENSG00000137198 | GMPR            | 6  | 16238580  | 16295549  | protein_coding | 11,85 | 0 |
| ENSG00000109919 | MTCH2           | 11 | 47617315  | 47642623  | protein_coding | 11,84 | 0 |
| ENSG00000144668 | ITGA9           | 3  | 37452115  | 37823514  | protein_coding | 11,84 | 0 |
| ENSG00000149823 | VPS51           | 11 | 65089324  | 65111860  | protein_coding | 11,84 | 0 |
| ENSG00000175536 | LIPT2           | 11 | 74491712  | 74493733  | protein_coding | 11,81 | 0 |
| ENSG00000213809 | KLRK1           | 12 | 10372353  | 10391874  | protein_coding | 11,80 | 0 |
| ENSG00000143954 | REG3G           | 2  | 79025686  | 79028505  | protein_coding | 11,80 | 0 |
| ENSG00000116882 | HAO2            | 1  | 119368779 | 119394130 | protein_coding | 11,80 | 0 |
| ENSG00000162433 | AK4             | 1  | 65147549  | 65232145  | protein_coding | 11,80 | 0 |
| ENSG00000091129 | NRCAM           | 7  | 108147623 | 108456717 | protein_coding | 11,79 | 0 |
| ENSG00000187045 | TMPRSS6         | 22 | 37065436  | 37109563  | protein_coding | 11,73 | 0 |
| ENSG00000170248 | PDCD6IP         | 3  | 33798352  | 33869707  | protein_coding | 11,71 | 0 |
| ENSG00000155621 | C9orf85         | 9  | 71911510  | 71986054  | protein_coding | 11,71 | 0 |
| ENSG00000160285 | LSS             | 21 | 46188141  | 46228824  | protein_coding | 11,70 | 0 |
| ENSG00000204923 | FBXO48          | 2  | 68459419  | 68467258  | protein_coding | 11,69 | 0 |
| ENSG00000141503 | MINK1           | 17 | 4833388   | 4898061   | protein_coding | 11,69 | 0 |
| ENSG00000147874 | HAUS6           | 9  | 19053143  | 19103119  | protein_coding | 11,68 | 0 |
| ENSG00000110955 | ATP5B           | 12 | 56638175  | 56646068  | protein_coding | 11,68 | 0 |
| ENSG00000108582 | CPD             | 17 | 30378905  | 30469989  | protein_coding | 11,68 | 0 |
| ENSG00000108839 | ALOX12          | 17 | 6996065   | 7010736   | protein_coding | 11,67 | 0 |
| ENSG00000176697 | BDNF            | 11 | 27654893  | 27722058  | protein_coding | 11,66 | 0 |
| ENSG00000198171 | DDRDK1          | 20 | 3190350   | 3204685   | protein_coding | 11,66 | 0 |
| ENSG00000146433 | TMEM181         | 6  | 158536436 | 158635428 | protein_coding | 11,66 | 0 |
| ENSG00000124459 | ZNF45           | 19 | 43912629  | 43935278  | protein_coding | 11,65 | 0 |
| ENSG00000144724 | PTPRG           | 3  | 61561569  | 62297613  | protein_coding | 11,64 | 0 |
| ENSG00000104951 | IL411           | 19 | 49889654  | 49929539  | protein_coding | 11,64 | 0 |
| ENSG00000159267 | HLC5            | 21 | 36750888  | 36990236  | protein_coding | 11,64 | 0 |
| ENSG00000076356 | PLXNA2          | 1  | 20802242  | 208244320 | protein_coding | 11,64 | 0 |
| ENSG00000198961 | PJA2            | 5  | 109334709 | 109409994 | protein_coding | 11,63 | 0 |
| ENSG00000196659 | TTC30B          | 2  | 177548998 | 177553014 | protein_coding | 11,63 | 0 |
| ENSG00000159202 | UBE2Z           | 17 | 48908369  | 48929056  | protein_coding | 11,63 | 0 |
| ENSG00000131873 | CHSY1           | 15 | 101175723 | 101251932 | protein_coding | 11,63 | 0 |
| ENSG00000095539 | SEMA4G          | 10 | 100969518 | 100985871 | protein_coding | 11,63 | 0 |
| ENSG00000164296 | TIGD6           | 5  | 149993118 | 150001167 | protein_coding | 11,62 | 0 |
| ENSG00000186111 | PIP5K1C         | 19 | 3630183   | 3700479   | protein_coding | 11,61 | 0 |
| ENSG00000121207 | LRAT            | 4  | 154626945 | 154753118 | protein_coding | 11,61 | 0 |
| ENSG00000143674 | ENSG00000143674 | 1  | 233327768 | 233385148 | protein_coding | 11,60 | 0 |
| ENSG00000182853 | VMO1            | 17 | 4785285   | 4786433   | protein_coding | 11,60 | 0 |
| ENSG00000253485 | PCDHGA5         | 5  | 141364232 | 141512979 | protein_coding | 11,60 | 0 |
| ENSG00000159884 | CCDC107         | 9  | 35658290  | 35661511  | protein_coding | 11,59 | 0 |
| ENSG00000168275 | COA6            | 1  | 234373456 | 234384049 | protein_coding | 11,58 | 0 |
| ENSG00000141252 | VPS53           | 17 | 508668    | 721717    | protein_coding | 11,58 | 0 |
| ENSG00000198860 | TSEN15          | 1  | 184051677 | 184074212 | protein_coding | 11,58 | 0 |

|                 |            |    |           |           |                |       |   |
|-----------------|------------|----|-----------|-----------|----------------|-------|---|
| ENSG00000185187 | SIGIRR     | 11 | 405716    | 417455    | protein_coding | 11,58 | 0 |
| ENSG00000108509 | CAMTA2     | 17 | 4967992   | 4987652   | protein_coding | 11,58 | 0 |
| ENSG00000115946 | PNO1       | 2  | 68157844  | 68176238  | protein_coding | 11,57 | 0 |
| ENSG00000150967 | ABCB9      | 12 | 122920951 | 122981649 | protein_coding | 11,56 | 0 |
| ENSG00000256294 | ZNF225     | 19 | 44112181  | 44134816  | protein_coding | 11,56 | 0 |
| ENSG00000198517 | MAFK       | 7  | 1530714   | 1543043   | protein_coding | 11,56 | 0 |
| ENSG00000143379 | SETDB1     | 1  | 150926263 | 150964744 | protein_coding | 11,55 | 0 |
| ENSG00000141564 | RPTOR      | 17 | 80544819  | 80966371  | protein_coding | 11,55 | 0 |
| ENSG00000100196 | KDELRL3    | 22 | 38468062  | 38483447  | protein_coding | 11,55 | 0 |
| ENSG00000198911 | SREBF2     | 22 | 41833079  | 41907308  | protein_coding | 11,55 | 0 |
| ENSG00000204310 | AGPAT1     | 6  | 32168212  | 32178096  | protein_coding | 11,54 | 0 |
| ENSG00000128739 | SNRPN      | 15 | 24823637  | 24978723  | protein_coding | 11,53 | 0 |
| ENSG00000168118 | RAB4A      | 1  | 229271062 | 229305894 | protein_coding | 11,53 | 0 |
| ENSG00000152700 | SAR1B      | 5  | 134601144 | 134649271 | protein_coding | 11,52 | 0 |
| ENSG00000254893 | ENSG000002 | 5  | 76170093  | 76174331  | protein_coding | 11,51 | 0 |
| ENSG00000237190 | CDKN2AIPN  | 5  | 134402087 | 134411898 | protein_coding | 11,49 | 0 |
| ENSG00000103591 | AAGAB      | 15 | 67201033  | 67255195  | protein_coding | 11,49 | 0 |
| ENSG00000115649 | CNPPD1     | 2  | 219171897 | 219178106 | protein_coding | 11,49 | 0 |
| ENSG00000109756 | RAPGEF2    | 4  | 159104178 | 159360169 | protein_coding | 11,48 | 0 |
| ENSG00000163867 | ZMYM6      | 1  | 34986165  | 35031968  | protein_coding | 11,48 | 0 |
| ENSG00000204843 | DCTN1      | 2  | 74361154  | 74392087  | protein_coding | 11,47 | 0 |
| ENSG00000109475 | RPL34      | 4  | 108620566 | 108630412 | protein_coding | 11,46 | 0 |
| ENSG00000241973 | PI4KA      | 22 | 20707691  | 20859417  | protein_coding | 11,46 | 0 |
| ENSG00000271605 | MILR1      | 17 | 64449037  | 64468643  | protein_coding | 11,45 | 0 |
| ENSG00000166200 | COPS2      | 15 | 49106068  | 49155661  | protein_coding | 11,45 | 0 |
| ENSG00000100056 | DGCR14     | 22 | 19130279  | 19144684  | protein_coding | 11,45 | 0 |
| ENSG00000049541 | RFC2       | 7  | 74231499  | 74254458  | protein_coding | 11,45 | 0 |
| ENSG00000132677 | RHBG       | 1  | 156369212 | 156385219 | protein_coding | 11,44 | 0 |
| ENSG00000105568 | PPP2R1A    | 19 | 52190039  | 52229533  | protein_coding | 11,43 | 0 |
| ENSG00000111644 | ACRBP      | 12 | 6638075   | 6647460   | protein_coding | 11,43 | 0 |
| ENSG00000165698 | C9orf9     | 9  | 132878027 | 132890201 | protein_coding | 11,42 | 0 |
| ENSG00000167674 | ENSG000002 | 19 | 4472287   | 4502211   | protein_coding | 11,41 | 0 |
| ENSG00000198743 | SLC5A3     | 21 | 34073570  | 34106260  | protein_coding | 11,41 | 0 |
| ENSG00000082196 | C1QTNF3    | 5  | 34019448  | 34043832  | protein_coding | 11,40 | 0 |
| ENSG00000126005 | MMP24-AS1  | 20 | 35201745  | 35278131  | protein_coding | 11,40 | 0 |
| ENSG00000103064 | SLC7A6     | 16 | 68264516  | 68301823  | protein_coding | 11,38 | 0 |
| ENSG00000149260 | CAPN5      | 11 | 77066932  | 77126155  | protein_coding | 11,38 | 0 |
| ENSG00000148331 | ASB6       | 9  | 129634604 | 129642169 | protein_coding | 11,37 | 0 |
| ENSG00000173960 | UBXN2A     | 2  | 23927285  | 24004909  | protein_coding | 11,36 | 0 |
| ENSG00000134046 | MBD2       | 18 | 54151601  | 54224788  | protein_coding | 11,36 | 0 |
| ENSG00000133597 | ADCK2      | 7  | 140673153 | 140696261 | protein_coding | 11,36 | 0 |
| ENSG00000105889 | STEAP1B    | 7  | 22419444  | 22632925  | protein_coding | 11,36 | 0 |
| ENSG00000116459 | ATP5F1     | 1  | 111448864 | 111462773 | protein_coding | 11,36 | 0 |
| ENSG00000165819 | METTL3     | 14 | 21498133  | 21511375  | protein_coding | 11,35 | 0 |
| ENSG00000100209 | HSCB       | 22 | 28742031  | 28757515  | protein_coding | 11,35 | 0 |
| ENSG00000065978 | YBX1       | 1  | 42682427  | 42702349  | protein_coding | 11,34 | 0 |
| ENSG00000115661 | STK16      | 2  | 219245455 | 219250337 | protein_coding | 11,34 | 0 |
| ENSG00000132003 | ZSWIM4     | 19 | 13795460  | 13832230  | protein_coding | 11,34 | 0 |
| ENSG00000105808 | RASA4      | 7  | 102573807 | 102616757 | protein_coding | 11,33 | 0 |
| ENSG00000008018 | PSMB1      | 6  | 170535117 | 170553341 | protein_coding | 11,33 | 0 |
| ENSG00000065518 | NDUFB4     | 3  | 120596309 | 120602500 | protein_coding | 11,32 | 0 |
| ENSG00000178665 | ZNF713     | 7  | 55887475  | 55942225  | protein_coding | 11,32 | 0 |
| ENSG00000143569 | UBAP2L     | 1  | 154220179 | 154271510 | protein_coding | 11,32 | 0 |
| ENSG00000076662 | ICAM3      | 19 | 10333776  | 10339823  | protein_coding | 11,30 | 0 |
| ENSG00000160888 | IER2       | 19 | 13150415  | 13154908  | protein_coding | 11,30 | 0 |
| ENSG00000234409 | CCDC188    | 22 | 20148427  | 20151065  | protein_coding | 11,30 | 0 |
| ENSG00000197191 | CYSRT1     | 9  | 137224635 | 137226311 | protein_coding | 11,30 | 0 |
| ENSG00000243896 | OR2A7      | 7  | 144258607 | 144259722 | protein_coding | 11,30 | 0 |

|                 |            |    |           |           |                |       |   |
|-----------------|------------|----|-----------|-----------|----------------|-------|---|
| ENSG00000113212 | PCDHB7     | 5  | 141172619 | 141176383 | protein_coding | 11,30 | 0 |
| ENSG00000212122 | TSSK1B     | 5  | 113432554 | 113435031 | protein_coding | 11,30 | 0 |
| ENSG00000109320 | NFKB1      | 4  | 102501329 | 102617302 | protein_coding | 11,30 | 0 |
| ENSG00000125107 | CNOT1      | 16 | 58519951  | 58629886  | protein_coding | 11,29 | 0 |
| ENSG00000093167 | LRRFIP2    | 3  | 37052656  | 37183689  | protein_coding | 11,24 | 0 |
| ENSG00000162736 | NCSTN      | 1  | 160343272 | 160358952 | protein_coding | 11,24 | 0 |
| ENSG00000178163 | ZNF518B    | 4  | 10439874  | 10457410  | protein_coding | 11,24 | 0 |
| ENSG00000115282 | TTC31      | 2  | 74483073  | 74494886  | protein_coding | 11,23 | 0 |
| ENSG00000125247 | TMTC4      | 13 | 100603927 | 100675093 | protein_coding | 11,23 | 0 |
| ENSG00000180530 | NRIP1      | 21 | 14961235  | 15065000  | protein_coding | 11,23 | 0 |
| ENSG00000076944 | STXBP2     | 19 | 7636881   | 7647873   | protein_coding | 11,22 | 0 |
| ENSG00000176055 | MBLAC2     | 5  | 90458203  | 90474768  | protein_coding | 11,22 | 0 |
| ENSG00000135835 | KIAA1614   | 1  | 180913154 | 180951614 | protein_coding | 11,22 | 0 |
| ENSG00000134461 | ANKRD16    | 10 | 5861617   | 5889906   | protein_coding | 11,22 | 0 |
| ENSG00000149262 | INTS4      | 11 | 77878720  | 77994678  | protein_coding | 11,21 | 0 |
| ENSG00000157315 | TMED6      | 16 | 69343248  | 69351809  | protein_coding | 11,20 | 0 |
| ENSG00000183484 | GPR132     | 14 | 105049389 | 105065445 | protein_coding | 11,20 | 0 |
| ENSG00000123500 | COL10A1    | 6  | 116118923 | 116158747 | protein_coding | 11,20 | 0 |
| ENSG00000197506 | SLC28A3    | 9  | 84275457  | 84340683  | protein_coding | 11,20 | 0 |
| ENSG00000072803 | FBXW11     | 5  | 171861549 | 172006873 | protein_coding | 11,19 | 0 |
| ENSG00000166839 | ANKDD1A    | 15 | 64911902  | 64958700  | protein_coding | 11,18 | 0 |
| ENSG00000162971 | TYW5       | 2  | 199929975 | 199955736 | protein_coding | 11,17 | 0 |
| ENSG00000108406 | DHX40      | 17 | 59565525  | 59608345  | protein_coding | 11,16 | 0 |
| ENSG00000138639 | ARHGAP24   | 4  | 85475114  | 86002670  | protein_coding | 11,16 | 0 |
| ENSG00000206562 | METTL6     | 3  | 15381275  | 15440566  | protein_coding | 11,15 | 0 |
| ENSG00000185864 | NPIPB4     | 16 | 21834569  | 21880827  | protein_coding | 11,15 | 0 |
| ENSG00000108344 | PSMD3      | 17 | 39980797  | 39997960  | protein_coding | 11,15 | 0 |
| ENSG00000103653 | CSK        | 15 | 74782057  | 74803198  | protein_coding | 11,15 | 0 |
| ENSG00000155545 | MIER3      | 5  | 56919602  | 56971675  | protein_coding | 11,15 | 0 |
| ENSG00000134001 | EIF2S1     | 14 | 67359997  | 67386516  | protein_coding | 11,14 | 0 |
| ENSG00000175582 | RAB6A      | 11 | 73675638  | 73761137  | protein_coding | 11,14 | 0 |
| ENSG00000175756 | AURKAIP1   | 1  | 1373730   | 1375495   | protein_coding | 11,14 | 0 |
| ENSG00000072364 | AFF4       | 5  | 132875379 | 132963634 | protein_coding | 11,13 | 0 |
| ENSG00000168495 | POLR3D     | 8  | 22245104  | 22254600  | protein_coding | 11,13 | 0 |
| ENSG00000238227 | C9orf69    | 9  | 136114581 | 136118863 | protein_coding | 11,12 | 0 |
| ENSG00000036257 | CUL3       | 2  | 224470150 | 224585397 | protein_coding | 11,12 | 0 |
| ENSG00000146828 | SLC12A9    | 7  | 100826820 | 100867009 | protein_coding | 11,12 | 0 |
| ENSG00000092201 | SUPT16H    | 14 | 21351472  | 21384266  | protein_coding | 11,11 | 0 |
| ENSG00000138085 | ATRAID     | 2  | 27212027  | 27217178  | protein_coding | 11,11 | 0 |
| ENSG00000134809 | TIMM10     | 11 | 57528463  | 57530803  | protein_coding | 11,11 | 0 |
| ENSG00000206344 | HCG27      | 6  | 31197760  | 31203968  | protein_coding | 11,10 | 0 |
| ENSG00000169855 | ROBO1      | 3  | 78597240  | 79767815  | protein_coding | 11,09 | 0 |
| ENSG00000136100 | VPS36      | 13 | 52412602  | 52450628  | protein_coding | 11,09 | 0 |
| ENSG00000213967 | ZNF726     | 19 | 23914876  | 23945159  | protein_coding | 11,08 | 0 |
| ENSG00000163827 | LRRC2      | 3  | 46515423  | 46580099  | protein_coding | 11,08 | 0 |
| ENSG00000113594 | LIFR       | 5  | 38474963  | 38608354  | protein_coding | 11,08 | 0 |
| ENSG00000100065 | CARD10     | 22 | 37490362  | 37519542  | protein_coding | 11,08 | 0 |
| ENSG00000115525 | ST3GAL5    | 2  | 85839144  | 85889014  | protein_coding | 11,07 | 0 |
| ENSG00000152147 | GEMIN6     | 2  | 38751534  | 38785000  | protein_coding | 11,07 | 0 |
| ENSG00000058668 | ATP2B4     | 1  | 203626561 | 203744081 | protein_coding | 11,06 | 0 |
| ENSG00000122565 | CBX3       | 7  | 26201162  | 26213356  | protein_coding | 11,06 | 0 |
| ENSG00000140839 | CLEC18B    | 16 | 74408270  | 74421953  | protein_coding | 11,05 | 0 |
| ENSG00000105516 | DBP        | 19 | 48630030  | 48637438  | protein_coding | 11,05 | 0 |
| ENSG00000062822 | POLD1      | 19 | 50384204  | 50418018  | protein_coding | 11,04 | 0 |
| ENSG00000010219 | DYRK4      | 12 | 4562204   | 4615302   | protein_coding | 11,04 | 0 |
| ENSG00000147408 | CSGALNACT  | 8  | 19404161  | 19758029  | protein_coding | 11,04 | 0 |
| ENSG00000130813 | C19orf66   | 19 | 10086122  | 10093252  | protein_coding | 11,02 | 0 |
| ENSG00000247626 | 03/01/2002 | 2  | 197705369 | 197708387 | protein_coding | 11,02 | 0 |

|                 |                 |    |           |           |                |       |   |
|-----------------|-----------------|----|-----------|-----------|----------------|-------|---|
| ENSG00000162522 | KIAA1522        | 1  | 32741885  | 32774970  | protein_coding | 11,00 | 0 |
| ENSG00000123146 | ADGRE5          | 19 | 14380501  | 14408725  | protein_coding | 11,00 | 0 |
| ENSG00000160229 | ZNF66           | 19 | 20776304  | 20807322  | protein_coding | 11,00 | 0 |
| ENSG00000119725 | ZNF410          | 14 | 73886617  | 73932511  | protein_coding | 11,00 | 0 |
| ENSG00000232810 | TNF             | 6  | 31575567  | 31578336  | protein_coding | 11,00 | 0 |
| ENSG00000160716 | CHRN2           | 1  | 154567781 | 154580026 | protein_coding | 11,00 | 0 |
| ENSG00000196338 | NLGN3           | X  | 71144831  | 71171201  | protein_coding | 11,00 | 0 |
| ENSG00000155100 | OTUD6B          | 8  | 91070196  | 91087095  | protein_coding | 10,99 | 0 |
| ENSG00000185761 | ADAMTSL5        | 19 | 1505018   | 1513604   | protein_coding | 10,99 | 0 |
| ENSG00000136527 | TRA2B           | 3  | 185915906 | 185938136 | protein_coding | 10,99 | 0 |
| ENSG00000147400 | CETN2           | X  | 152826973 | 152830777 | protein_coding | 10,98 | 0 |
| ENSG00000164077 | MON1A           | 3  | 49908862  | 49930173  | protein_coding | 10,98 | 0 |
| ENSG00000106245 | BUD31           | 7  | 99408641  | 99419616  | protein_coding | 10,98 | 0 |
| ENSG00000198225 | FKBP1C          | 6  | 63211446  | 63213024  | protein_coding | 10,98 | 0 |
| ENSG00000068697 | LAPTM4A         | 2  | 20032650  | 20052028  | protein_coding | 10,97 | 0 |
| ENSG00000168282 | MGAT2           | 14 | 49620795  | 49623481  | protein_coding | 10,96 | 0 |
| ENSG00000112237 | CCNC            | 6  | 99542380  | 99568973  | protein_coding | 10,96 | 0 |
| ENSG00000180104 | EXOC3           | 5  | 443158    | 471937    | protein_coding | 10,94 | 0 |
| ENSG00000007341 | ST7L            | 1  | 112523518 | 112620825 | protein_coding | 10,94 | 0 |
| ENSG00000101654 | RNMT            | 18 | 13726660  | 13764558  | protein_coding | 10,94 | 0 |
| ENSG00000131748 | STAR3           | 17 | 39637065  | 39663484  | protein_coding | 10,93 | 0 |
| ENSG00000089094 | KDM2B           | 12 | 121429097 | 121581015 | protein_coding | 10,92 | 0 |
| ENSG00000168807 | SNTB2           | 16 | 69187129  | 69309052  | protein_coding | 10,92 | 0 |
| ENSG00000168061 | SAC3D1          | 11 | 65040901  | 65044828  | protein_coding | 10,91 | 0 |
| ENSG00000169071 | ROR2            | 9  | 91563091  | 91950162  | protein_coding | 10,91 | 0 |
| ENSG00000153208 | MERTK           | 2  | 111898479 | 112029561 | protein_coding | 10,91 | 0 |
| ENSG00000182257 | PRR34           | 22 | 46049478  | 46054144  | protein_coding | 10,90 | 0 |
| ENSG00000064201 | TSPAN32         | 11 | 2301997   | 2318200   | protein_coding | 10,90 | 0 |
| ENSG00000113924 | HGD             | 3  | 120628173 | 120682571 | protein_coding | 10,90 | 0 |
| ENSG00000196455 | PIK3R4          | 3  | 130678935 | 130746829 | protein_coding | 10,89 | 0 |
| ENSG00000130640 | TUBGCP2         | 10 | 133278630 | 133312337 | protein_coding | 10,88 | 0 |
| ENSG00000024526 | DEPDC1          | 1  | 68474152  | 68497221  | protein_coding | 10,88 | 0 |
| ENSG00000140471 | LINS1           | 15 | 100559369 | 100603230 | protein_coding | 10,88 | 0 |
| ENSG00000113812 | ACTR8           | 3  | 53867066  | 53882202  | protein_coding | 10,87 | 0 |
| ENSG00000144228 | SPOPL           | 2  | 138501801 | 138573547 | protein_coding | 10,86 | 0 |
| ENSG00000167130 | DOLPP1          | 9  | 129081100 | 129090438 | protein_coding | 10,86 | 0 |
| ENSG00000038358 | EDC4            | 16 | 67873023  | 67884503  | protein_coding | 10,86 | 0 |
| ENSG00000107186 | MPDZ            | 9  | 13105704  | 13279590  | protein_coding | 10,85 | 0 |
| ENSG00000279644 | ENSG00000279644 | 2  | 64552771  | 64592133  | protein_coding | 10,85 | 0 |
| ENSG00000151067 | CACNA1C         | 12 | 1970786   | 2697950   | protein_coding | 10,85 | 0 |
| ENSG00000166106 | ADAMTS15        | 11 | 130448974 | 130476641 | protein_coding | 10,84 | 0 |
| ENSG00000152332 | UHMK1           | 1  | 162497251 | 162529629 | protein_coding | 10,84 | 0 |
| ENSG00000124788 | ATXN1           | 6  | 16299112  | 16761491  | protein_coding | 10,82 | 0 |
| ENSG00000181026 | AEN             | 15 | 88621296  | 88632282  | protein_coding | 10,81 | 0 |
| ENSG00000182405 | PGBD4           | 15 | 34102073  | 34108684  | protein_coding | 10,81 | 0 |
| ENSG00000164466 | SFXN1           | 5  | 175477062 | 175529742 | protein_coding | 10,81 | 0 |
| ENSG00000147364 | FBXO25          | 8  | 406428    | 477967    | protein_coding | 10,80 | 0 |
| ENSG00000185896 | LAMP1           | 13 | 113297241 | 113323672 | protein_coding | 10,80 | 0 |
| ENSG00000168398 | BDKRB2          | 14 | 96204679  | 96244166  | protein_coding | 10,80 | 0 |
| ENSG00000111319 | SCNN1A          | 12 | 6346843   | 6377730   | protein_coding | 10,80 | 0 |
| ENSG00000155893 | PXYLP1          | 3  | 141228726 | 141294906 | protein_coding | 10,80 | 0 |
| ENSG00000047849 | MAP4            | 3  | 47850690  | 48089272  | protein_coding | 10,80 | 0 |
| ENSG00000171988 | JMJD1C          | 10 | 63167221  | 63521850  | protein_coding | 10,78 | 0 |
| ENSG00000100150 | DEPDC5          | 22 | 31753951  | 31907034  | protein_coding | 10,78 | 0 |
| ENSG00000164091 | WDR82           | 3  | 52254421  | 52288020  | protein_coding | 10,77 | 0 |
| ENSG00000205423 | CNEP1R1         | 16 | 50024410  | 50037088  | protein_coding | 10,76 | 0 |
| ENSG00000179750 | APOBEC3B        | 22 | 38982347  | 38992804  | protein_coding | 10,75 | 0 |
| ENSG00000012983 | MAP4K5          | 14 | 50418501  | 50561126  | protein_coding | 10,75 | 0 |

|                 |            |    |           |           |                |       |   |
|-----------------|------------|----|-----------|-----------|----------------|-------|---|
| ENSG00000164576 | SAP30L     | 5  | 154445957 | 154461054 | protein_coding | 10,74 | 0 |
| ENSG00000165091 | TMC1       | 9  | 72521801  | 72836351  | protein_coding | 10,73 | 0 |
| ENSG00000086062 | B4GALT1    | 9  | 33104082  | 33167356  | protein_coding | 10,73 | 0 |
| ENSG00000144028 | SNRNP200   | 2  | 96274336  | 96305515  | protein_coding | 10,73 | 0 |
| ENSG00000104883 | PEX11G     | 19 | 7476875   | 7497449   | protein_coding | 10,73 | 0 |
| ENSG00000112514 | CUTA       | 6  | 33416442  | 33418317  | protein_coding | 10,72 | 0 |
| ENSG00000111266 | DUSP16     | 12 | 12474210  | 12562383  | protein_coding | 10,72 | 0 |
| ENSG00000006712 | PAF1       | 19 | 39385852  | 39391195  | protein_coding | 10,71 | 0 |
| ENSG00000126950 | TMEM35     | X  | 101078720 | 101096364 | protein_coding | 10,71 | 0 |
| ENSG00000131381 | RBSN       | 3  | 15070073  | 15099163  | protein_coding | 10,71 | 0 |
| ENSG00000139842 | CUL4A      | 13 | 113208193 | 113267108 | protein_coding | 10,70 | 0 |
| ENSG00000177733 | HNRNPA0    | 5  | 137745651 | 137754376 | protein_coding | 10,70 | 0 |
| ENSG00000176919 | C8G        | 9  | 136945246 | 136946974 | protein_coding | 10,70 | 0 |
| ENSG00000157483 | MYO1E      | 15 | 59132434  | 59372900  | protein_coding | 10,69 | 0 |
| ENSG00000258388 | PPT2-EGFL8 | 6  | 32153845  | 32171978  | protein_coding | 10,69 | 0 |
| ENSG00000108518 | PFN1       | 17 | 4945652   | 4949061   | protein_coding | 10,68 | 0 |
| ENSG00000176915 | ANKLE2     | 12 | 132725503 | 132761888 | protein_coding | 10,68 | 0 |
| ENSG00000142892 | PIGK       | 1  | 77088990  | 77219430  | protein_coding | 10,68 | 0 |
| ENSG00000170260 | ZNF212     | 7  | 149239651 | 149255609 | protein_coding | 10,65 | 0 |
| ENSG00000103710 | RASL12     | 15 | 65053337  | 65076690  | protein_coding | 10,65 | 0 |
| ENSG00000100294 | MCAT       | 22 | 43132206  | 43143394  | protein_coding | 10,65 | 0 |
| ENSG00000139890 | REM2       | 14 | 22883165  | 22887686  | protein_coding | 10,64 | 0 |
| ENSG00000166946 | CCNDBP1    | 15 | 43185118  | 43197176  | protein_coding | 10,63 | 0 |
| ENSG00000121022 | COPS5      | 8  | 67043079  | 67083783  | protein_coding | 10,63 | 0 |
| ENSG00000150787 | PTS        | 11 | 112226365 | 112269955 | protein_coding | 10,62 | 0 |
| ENSG00000155096 | AZIN1      | 8  | 102826357 | 102893864 | protein_coding | 10,62 | 0 |
| ENSG00000141441 | GAREM      | 18 | 32124877  | 32470484  | protein_coding | 10,61 | 0 |
| ENSG00000119383 | PPP2R4     | 9  | 129110950 | 129148946 | protein_coding | 10,60 | 0 |
| ENSG00000164241 | C5orf63    | 5  | 127042558 | 127073492 | protein_coding | 10,60 | 0 |
| ENSG00000167850 | CD300C     | 17 | 74541108  | 74546143  | protein_coding | 10,60 | 0 |
| ENSG00000137571 | SLC05A1    | 8  | 69667047  | 69835064  | protein_coding | 10,60 | 0 |
| ENSG00000147434 | CHRNA6     | 8  | 42752620  | 42796392  | protein_coding | 10,60 | 0 |
| ENSG00000179639 | FCER1A     | 1  | 159289714 | 159308224 | protein_coding | 10,60 | 0 |
| ENSG00000189306 | RRP7A      | 22 | 42509968  | 42519802  | protein_coding | 10,60 | 0 |
| ENSG00000134324 | LPIN1      | 2  | 11677595  | 11827409  | protein_coding | 10,59 | 0 |
| ENSG00000198885 | ITPRIPL1   | 2  | 96325331  | 96330517  | protein_coding | 10,58 | 0 |
| ENSG00000167637 | ZNF283     | 19 | 43827292  | 43852017  | protein_coding | 10,58 | 0 |
| ENSG00000188352 | FOCAD      | 9  | 20658309  | 20995955  | protein_coding | 10,57 | 0 |
| ENSG00000160753 | RUSC1      | 1  | 155320896 | 155331114 | protein_coding | 10,57 | 0 |
| ENSG00000164638 | SLC29A4    | 7  | 5274369   | 5306870   | protein_coding | 10,57 | 0 |
| ENSG00000180423 | HARBI1     | 11 | 46602861  | 46617909  | protein_coding | 10,56 | 0 |
| ENSG00000162434 | JAK1       | 1  | 64833229  | 64966504  | protein_coding | 10,56 | 0 |
| ENSG00000118518 | RNF146     | 6  | 127266610 | 127288567 | protein_coding | 10,55 | 0 |
| ENSG00000164896 | FASTK      | 7  | 151076593 | 151080866 | protein_coding | 10,55 | 0 |
| ENSG00000162191 | UBXN1      | 11 | 62676498  | 62679117  | protein_coding | 10,54 | 0 |
| ENSG00000008130 | NADK       | 1  | 1751232   | 1780457   | protein_coding | 10,54 | 0 |
| ENSG00000203778 | FAM229B    | 6  | 112087599 | 112102790 | protein_coding | 10,54 | 0 |
| ENSG00000179262 | RAD23A     | 19 | 12945855  | 12953642  | protein_coding | 10,52 | 0 |
| ENSG00000134444 | KIAA1468   | 18 | 62187258  | 62307829  | protein_coding | 10,52 | 0 |
| ENSG00000160049 | DFFA       | 1  | 10456522  | 10472526  | protein_coding | 10,52 | 0 |
| ENSG00000156931 | VPS8       | 3  | 184812143 | 185052614 | protein_coding | 10,52 | 0 |
| ENSG00000150938 | CRIM1      | 2  | 36355926  | 36551135  | protein_coding | 10,51 | 0 |
| ENSG00000117616 | RSRP1      | 1  | 25242237  | 25338213  | protein_coding | 10,51 | 0 |
| ENSG00000140832 | MARVELD3   | 16 | 71626161  | 71642114  | protein_coding | 10,50 | 0 |
| ENSG00000166523 | CLEC4E     | 12 | 8533305   | 8540963   | protein_coding | 10,50 | 0 |
| ENSG00000153944 | MSI2       | 17 | 57255851  | 57684685  | protein_coding | 10,50 | 0 |
| ENSG00000215114 | UBXN2B     | 8  | 58411264  | 58451501  | protein_coding | 10,50 | 0 |
| ENSG00000136933 | RABEPK     | 9  | 125200542 | 125234158 | protein_coding | 10,50 | 0 |

|                 |                 |    |           |           |                |       |   |
|-----------------|-----------------|----|-----------|-----------|----------------|-------|---|
| ENSG00000119977 | TCTN3           | 10 | 95663396  | 95694143  | protein_coding | 10,50 | 0 |
| ENSG00000248487 | ABHD14A         | 3  | 51971426  | 51981199  | protein_coding | 10,49 | 0 |
| ENSG00000081052 | COL4A4          | 2  | 227002711 | 227164113 | protein_coding | 10,49 | 0 |
| ENSG00000281656 | ENSG00000281656 | 7  | 116248600 | 116249422 | protein_coding | 10,48 | 0 |
| ENSG00000070444 | MNT             | 17 | 2384060   | 2401118   | protein_coding | 10,48 | 0 |
| ENSG00000112578 | BYSL            | 6  | 41921188  | 41933046  | protein_coding | 10,48 | 0 |
| ENSG00000174165 | ZDHHC24         | 11 | 66520637  | 66546238  | protein_coding | 10,48 | 0 |
| ENSG00000122008 | POLK            | 5  | 75511756  | 75601144  | protein_coding | 10,47 | 0 |
| ENSG00000108405 | P2RX1           | 17 | 3896592   | 3916500   | protein_coding | 10,46 | 0 |
| ENSG00000169727 | GPS1            | 17 | 82050691  | 82057470  | protein_coding | 10,46 | 0 |
| ENSG00000104133 | SPG11           | 15 | 44562696  | 44663678  | protein_coding | 10,45 | 0 |
| ENSG00000173120 | KDM2A           | 11 | 67119269  | 67258087  | protein_coding | 10,45 | 0 |
| ENSG00000159905 | ZNF221          | 19 | 43951223  | 43967709  | protein_coding | 10,44 | 0 |
| ENSG00000127328 | RAB3IP          | 12 | 69738681  | 69823204  | protein_coding | 10,44 | 0 |
| ENSG00000196381 | ZNF781          | 19 | 37667751  | 37692322  | protein_coding | 10,44 | 0 |
| ENSG00000073849 | ST6GAL1         | 3  | 186930485 | 187078553 | protein_coding | 10,44 | 0 |
| ENSG00000174851 | YIF1A           | 11 | 66284580  | 66289170  | protein_coding | 10,43 | 0 |
| ENSG00000141646 | SMAD4           | 18 | 51028394  | 51085045  | protein_coding | 10,42 | 0 |
| ENSG00000215375 | MYL5            | 4  | 673580    | 682033    | protein_coding | 10,42 | 0 |
| ENSG00000125971 | DYNLRB1         | 20 | 34516409  | 34540958  | protein_coding | 10,42 | 0 |
| ENSG00000177311 | ZBTB38          | 3  | 141324213 | 141449792 | protein_coding | 10,42 | 0 |
| ENSG00000165275 | TRMT10B         | 9  | 37753803  | 37778972  | protein_coding | 10,40 | 0 |
| ENSG00000164808 | SPIDR           | 8  | 47260575  | 47736306  | protein_coding | 10,40 | 0 |
| ENSG00000070413 | DGCR2           | 22 | 19036282  | 19122454  | protein_coding | 10,40 | 0 |
| ENSG00000142599 | RERE            | 1  | 8352397   | 8817643   | protein_coding | 10,39 | 0 |
| ENSG00000140299 | BNIP2           | 15 | 59659146  | 59689534  | protein_coding | 10,39 | 0 |
| ENSG00000142655 | PEX14           | 1  | 10472288  | 10630758  | protein_coding | 10,39 | 0 |
| ENSG00000073598 | FNDC8           | 17 | 35121579  | 35130732  | protein_coding | 10,39 | 0 |
| ENSG00000153982 | GDPD1           | 17 | 59220467  | 59275967  | protein_coding | 10,38 | 0 |
| ENSG00000031003 | FAM13B          | 5  | 137937960 | 138051961 | protein_coding | 10,37 | 0 |
| ENSG00000154114 | TBCEL           | 11 | 121024072 | 121090775 | protein_coding | 10,37 | 0 |
| ENSG00000143314 | MRPL24          | 1  | 156737303 | 156741590 | protein_coding | 10,37 | 0 |
| ENSG00000089154 | GCN1            | 12 | 120127203 | 120194710 | protein_coding | 10,36 | 0 |
| ENSG00000120800 | UTP20           | 12 | 101280109 | 101386616 | protein_coding | 10,36 | 0 |
| ENSG00000069849 | ATP1B3          | 3  | 141876124 | 141926514 | protein_coding | 10,33 | 0 |
| ENSG00000131778 | CHD1L           | 1  | 147242641 | 147295766 | protein_coding | 10,33 | 0 |
| ENSG00000169189 | NSMCE1          | 16 | 27224991  | 27268794  | protein_coding | 10,32 | 0 |
| ENSG00000198939 | ZFP2            | 5  | 178895894 | 178933212 | protein_coding | 10,31 | 0 |
| ENSG00000175550 | DRAP1           | 11 | 65919257  | 65921561  | protein_coding | 10,30 | 0 |
| ENSG00000129467 | ADCY4           | 14 | 24318349  | 24335093  | protein_coding | 10,30 | 0 |
| ENSG00000120451 | SNX19           | 11 | 130875436 | 130916509 | protein_coding | 10,30 | 0 |
| ENSG00000184014 | DENND5A         | 11 | 9138825   | 9265390   | protein_coding | 10,29 | 0 |
| ENSG0000014641  | MDH1            | 2  | 63588609  | 63607197  | protein_coding | 10,29 | 0 |
| ENSG00000162409 | PRKAA2          | 1  | 56645322  | 56715335  | protein_coding | 10,29 | 0 |
| ENSG00000120733 | KDM3B           | 5  | 138352596 | 138437028 | protein_coding | 10,29 | 0 |
| ENSG00000196700 | ZNF512B         | 20 | 63956702  | 64048758  | protein_coding | 10,28 | 0 |
| ENSG00000138439 | FAM117B         | 2  | 202635188 | 202769757 | protein_coding | 10,28 | 0 |
| ENSG00000074842 | MYDGF           | 19 | 4641374   | 4670370   | protein_coding | 10,27 | 0 |
| ENSG00000106244 | PDAP1           | 7  | 99392048  | 99408829  | protein_coding | 10,27 | 0 |
| ENSG00000132359 | RAP1GAP2        | 17 | 2777056   | 3037739   | protein_coding | 10,27 | 0 |
| ENSG00000135392 | DNAJC14         | 12 | 55820960  | 55830824  | protein_coding | 10,26 | 0 |
| ENSG00000198252 | STYX            | 14 | 52730180  | 52774998  | protein_coding | 10,26 | 0 |
| ENSG00000182670 | TTC3            | 21 | 37073226  | 37203112  | protein_coding | 10,26 | 0 |
| ENSG00000150722 | PPP1R1C         | 2  | 181954241 | 182131398 | protein_coding | 10,25 | 0 |
| ENSG00000160097 | FNDC5           | 1  | 32862268  | 32872482  | protein_coding | 10,23 | 0 |
| ENSG00000151229 | SLC2A13         | 12 | 39755021  | 40106089  | protein_coding | 10,23 | 0 |
| ENSG00000101290 | CDS2            | 20 | 5126786   | 5197887   | protein_coding | 10,23 | 0 |
| ENSG00000116688 | MFN2            | 1  | 11980181  | 12013514  | protein_coding | 10,22 | 0 |

|                 |          |    |           |           |                |       |   |
|-----------------|----------|----|-----------|-----------|----------------|-------|---|
| ENSG0000075539  | FRYL     | 4  | 48497361  | 48780322  | protein_coding | 10,22 | 0 |
| ENSG00000122884 | P4HA1    | 10 | 73007217  | 73096974  | protein_coding | 10,22 | 0 |
| ENSG00000147586 | MRPS28   | 8  | 79918717  | 80030289  | protein_coding | 10,22 | 0 |
| ENSG00000145860 | RNF145   | 5  | 159157409 | 159210053 | protein_coding | 10,22 | 0 |
| ENSG00000007372 | PAX6     | 11 | 31784792  | 31817961  | protein_coding | 10,21 | 0 |
| ENSG00000136770 | DNAJC1   | 10 | 21756537  | 22003769  | protein_coding | 10,21 | 0 |
| ENSG00000035687 | ADSS     | 1  | 244408494 | 244452134 | protein_coding | 10,21 | 0 |
| ENSG00000139433 | GLTP     | 12 | 109850943 | 109880488 | protein_coding | 10,21 | 0 |
| ENSG00000079332 | SAR1A    | 10 | 70147289  | 70170523  | protein_coding | 10,20 | 0 |
| ENSG00000146477 | SLC22A3  | 6  | 160348268 | 160452581 | protein_coding | 10,20 | 0 |
| ENSG00000115008 | IL1A     | 2  | 112773915 | 112784590 | protein_coding | 10,20 | 0 |
| ENSG00000116191 | RALGPS2  | 1  | 178725147 | 178921841 | protein_coding | 10,20 | 0 |
| ENSG00000218739 | CEBPZOS  | 2  | 37196488  | 37216193  | protein_coding | 10,19 | 0 |
| ENSG00000121892 | PDS5A    | 4  | 39822863  | 39977956  | protein_coding | 10,19 | 0 |
| ENSG00000119242 | CCDC92   | 12 | 123918660 | 123972831 | protein_coding | 10,19 | 0 |
| ENSG00000105829 | BET1     | 7  | 93962762  | 94004382  | protein_coding | 10,19 | 0 |
| ENSG00000165886 | UBTD1    | 10 | 97498868  | 97571209  | protein_coding | 10,19 | 0 |
| ENSG00000124523 | SIRT5    | 6  | 13574529  | 13615158  | protein_coding | 10,18 | 0 |
| ENSG00000078668 | VDAC3    | 8  | 42391624  | 42405897  | protein_coding | 10,18 | 0 |
| ENSG00000198087 | CD2AP    | 6  | 47477789  | 47627263  | protein_coding | 10,17 | 0 |
| ENSG00000009790 | TRAF3IP3 | 1  | 209756032 | 209782320 | protein_coding | 10,17 | 0 |
| ENSG00000004455 | AK2      | 1  | 33007940  | 33080996  | protein_coding | 10,16 | 0 |
| ENSG00000135297 | MTO1     | 6  | 73461578  | 73509236  | protein_coding | 10,15 | 0 |
| ENSG00000146700 | SSC4D    | 7  | 76389334  | 76409695  | protein_coding | 10,15 | 0 |
| ENSG00000146476 | ARMT1    | 6  | 151452258 | 151470101 | protein_coding | 10,14 | 0 |
| ENSG00000196705 | ZNF431   | 19 | 21142024  | 21196053  | protein_coding | 10,14 | 0 |
| ENSG00000101974 | ATP11C   | X  | 139726346 | 139945276 | protein_coding | 10,14 | 0 |
| ENSG00000126215 | XRCC3    | 14 | 103697609 | 103715504 | protein_coding | 10,14 | 0 |
| ENSG00000164970 | FAM219A  | 9  | 34398184  | 34458570  | protein_coding | 10,13 | 0 |
| ENSG00000137764 | MAP2K5   | 15 | 67542709  | 67807123  | protein_coding | 10,13 | 0 |
| ENSG00000004534 | RBM6     | 3  | 49940007  | 50100045  | protein_coding | 10,13 | 0 |
| ENSG00000103091 | WDR59    | 16 | 74871367  | 75000173  | protein_coding | 10,13 | 0 |
| ENSG00000124782 | RREB1    | 6  | 7107597   | 7251980   | protein_coding | 10,12 | 0 |
| ENSG00000185963 | BICD2    | 9  | 92711363  | 92764812  | protein_coding | 10,11 | 0 |
| ENSG00000166012 | TAF1D    | 11 | 93729948  | 93784391  | protein_coding | 10,11 | 0 |
| ENSG00000130307 | USHBP1   | 19 | 17249176  | 17282786  | protein_coding | 10,10 | 0 |
| ENSG00000121903 | ZSCAN20  | 1  | 33472645  | 33496507  | protein_coding | 10,09 | 0 |
| ENSG00000143450 | OAZ3     | 1  | 151762899 | 151771334 | protein_coding | 10,09 | 0 |
| ENSG00000140943 | MBTPS1   | 16 | 84053761  | 84116906  | protein_coding | 10,09 | 0 |
| ENSG00000181350 | LRRC75A  | 17 | 16441577  | 16492153  | protein_coding | 10,08 | 0 |
| ENSG00000103495 | MAZ      | 16 | 29806106  | 29811164  | protein_coding | 10,08 | 0 |
| ENSG00000177854 | TMEM187  | X  | 153972327 | 153983195 | protein_coding | 10,08 | 0 |
| ENSG00000243725 | TTC4     | 1  | 54715822  | 54742657  | protein_coding | 10,08 | 0 |
| ENSG00000181830 | SLC35C1  | 11 | 45804072  | 45813015  | protein_coding | 10,08 | 0 |
| ENSG00000223496 | EXOSC6   | 16 | 70246778  | 70251930  | protein_coding | 10,08 | 0 |
| ENSG00000117632 | STMN1    | 1  | 25884181  | 25906991  | protein_coding | 10,07 | 0 |
| ENSG00000183773 | AIFM3    | 22 | 20965108  | 20981360  | protein_coding | 10,07 | 0 |
| ENSG00000055163 | CYFIP2   | 5  | 157266079 | 157395595 | protein_coding | 10,06 | 0 |
| ENSG00000251247 | ZNF345   | 19 | 36850361  | 36913029  | protein_coding | 10,06 | 0 |
| ENSG00000120029 | C10orf76 | 10 | 101845599 | 102056193 | protein_coding | 10,04 | 0 |
| ENSG00000134056 | MRPS36   | 5  | 69217760  | 69230129  | protein_coding | 10,04 | 0 |
| ENSG00000168286 | THAP11   | 16 | 67842082  | 67844195  | protein_coding | 10,04 | 0 |
| ENSG00000174606 | ANGEL2   | 1  | 212992182 | 213015826 | protein_coding | 10,03 | 0 |
| ENSG00000137691 | C11orf70 | 11 | 102047443 | 102084560 | protein_coding | 10,03 | 0 |
| ENSG00000068097 | HEATR6   | 17 | 60043194  | 60078931  | protein_coding | 10,03 | 0 |
| ENSG00000132463 | GRSF1    | 4  | 70815782  | 70839945  | protein_coding | 10,02 | 0 |
| ENSG00000223547 | ZNF844   | 19 | 12064699  | 12081565  | protein_coding | 10,02 | 0 |
| ENSG00000173915 | USMG5    | 10 | 103389041 | 103396466 | protein_coding | 10,02 | 0 |

|                 |                 |    |           |           |                |       |   |
|-----------------|-----------------|----|-----------|-----------|----------------|-------|---|
| ENSG00000136854 | STXBP1          | 9  | 127611760 | 127692936 | protein_coding | 10,02 | 0 |
| ENSG00000166598 | HSP90B1         | 12 | 103930107 | 103953645 | protein_coding | 10,01 | 0 |
| ENSG00000095932 | SMIM24          | 19 | 3473986   | 3480542   | protein_coding | 10,00 | 0 |
| ENSG00000188868 | ZNF563          | 19 | 12317477  | 12333720  | protein_coding | 10,00 | 0 |
| ENSG00000158406 | HIST1H4H        | 6  | 26277609  | 26285638  | protein_coding | 10,00 | 0 |
| ENSG00000146083 | RNF44           | 5  | 176526697 | 176538025 | protein_coding | 10,00 | 0 |
| ENSG00000143061 | IGSF3           | 1  | 116574399 | 116667755 | protein_coding | 9,98  | 0 |
| ENSG00000168096 | ANKS3           | 16 | 4696510   | 4734378   | protein_coding | 9,95  | 0 |
| ENSG00000127481 | UBR4            | 1  | 19074506  | 19210276  | protein_coding | 9,94  | 0 |
| ENSG00000141965 | FEM1A           | 19 | 4791681   | 4801273   | protein_coding | 9,94  | 0 |
| ENSG00000065833 | ME1             | 6  | 83210389  | 83431071  | protein_coding | 9,92  | 0 |
| ENSG00000132128 | LRRC41          | 1  | 46261196  | 46303608  | protein_coding | 9,91  | 0 |
| ENSG00000169683 | LRRC45          | 17 | 82023302  | 82031151  | protein_coding | 9,91  | 0 |
| ENSG00000155066 | PROM2           | 2  | 95274453  | 95291308  | protein_coding | 9,91  | 0 |
| ENSG00000182866 | LCK             | 1  | 32251239  | 32286165  | protein_coding | 9,91  | 0 |
| ENSG00000144214 | LYG1            | 2  | 99284238  | 99304742  | protein_coding | 9,90  | 0 |
| ENSG00000013725 | CD6             | 11 | 60971680  | 61020377  | protein_coding | 9,90  | 0 |
| ENSG00000204161 | C10orf128       | 10 | 49154725  | 49188585  | protein_coding | 9,90  | 0 |
| ENSG00000121594 | CD80            | 3  | 119524293 | 119559602 | protein_coding | 9,90  | 0 |
| ENSG00000163701 | IL17RE          | 3  | 9902612   | 9916402   | protein_coding | 9,90  | 0 |
| ENSG00000150995 | ITPR1           | 3  | 4493348   | 4847840   | protein_coding | 9,90  | 0 |
| ENSG00000264343 | NOTCH2NL        | 1  | 146146203 | 146229026 | protein_coding | 9,89  | 0 |
| ENSG00000100413 | POLR3H          | 22 | 41525804  | 41544606  | protein_coding | 9,89  | 0 |
| ENSG00000170871 | KIAA0232        | 4  | 6781375   | 6884170   | protein_coding | 9,89  | 0 |
| ENSG00000131386 | GALNT15         | 3  | 16174649  | 16231992  | protein_coding | 9,89  | 0 |
| ENSG00000115694 | STK25           | 2  | 241492674 | 241509730 | protein_coding | 9,88  | 0 |
| ENSG00000116337 | AMPD2           | 1  | 109616104 | 109632051 | protein_coding | 9,88  | 0 |
| ENSG00000170085 | SIMC1           | 5  | 176238367 | 176345991 | protein_coding | 9,87  | 0 |
| ENSG00000185721 | DRG1            | 22 | 31399523  | 31528740  | protein_coding | 9,86  | 0 |
| ENSG00000162645 | GBP2            | 1  | 89106132  | 89150456  | protein_coding | 9,86  | 0 |
| ENSG00000141510 | TP53            | 17 | 7661779   | 7687550   | protein_coding | 9,85  | 0 |
| ENSG00000132823 | OSER1           | 20 | 44196496  | 44210791  | protein_coding | 9,85  | 0 |
| ENSG00000137573 | SULF1           | 8  | 69466624  | 69660915  | protein_coding | 9,85  | 0 |
| ENSG00000169692 | AGPAT2          | 9  | 136673143 | 136687423 | protein_coding | 9,84  | 0 |
| ENSG00000125166 | GOT2            | 16 | 58707131  | 58734357  | protein_coding | 9,83  | 0 |
| ENSG00000163749 | CCDC158         | 4  | 76312997  | 76421868  | protein_coding | 9,83  | 0 |
| ENSG00000164715 | LMTK2           | 7  | 98106885  | 98209633  | protein_coding | 9,81  | 0 |
| ENSG00000160633 | SAFB            | 19 | 5623035   | 5668478   | protein_coding | 9,81  | 0 |
| ENSG00000132664 | POLR3F          | 20 | 18467127  | 18484643  | protein_coding | 9,81  | 0 |
| ENSG00000101197 | BIRC7           | 20 | 63235883  | 63240507  | protein_coding | 9,80  | 0 |
| ENSG00000255587 | RAB44           | 6  | 36697851  | 36733183  | protein_coding | 9,80  | 0 |
| ENSG00000277877 | ENSG00000277877 | 1  | 244845167 | 244855497 | protein_coding | 9,80  | 0 |
| ENSG00000182318 | ZSCAN22         | 19 | 58327019  | 58342332  | protein_coding | 9,80  | 0 |
| ENSG00000135953 | MFSD9           | 2  | 102715840 | 102736888 | protein_coding | 9,80  | 0 |
| ENSG00000118965 | WDR35           | 2  | 19910260  | 19990131  | protein_coding | 9,80  | 0 |
| ENSG00000115183 | TANC1           | 2  | 158968634 | 159232659 | protein_coding | 9,78  | 0 |
| ENSG00000172748 | ZNF596          | 8  | 232137    | 247342    | protein_coding | 9,78  | 0 |
| ENSG00000146909 | NOM1            | 7  | 156949723 | 156973182 | protein_coding | 9,77  | 0 |
| ENSG00000101391 | CDK5RAP1        | 20 | 33358839  | 33401561  | protein_coding | 9,77  | 0 |
| ENSG00000187210 | GCNT1           | 9  | 76419850  | 76507416  | protein_coding | 9,75  | 0 |
| ENSG00000162444 | RBP7            | 1  | 9997206   | 10016020  | protein_coding | 9,75  | 0 |
| ENSG00000198440 | ZNF583          | 19 | 56397966  | 56436035  | protein_coding | 9,74  | 0 |
| ENSG00000100092 | SH3BP1          | 22 | 37634654  | 37666932  | protein_coding | 9,74  | 0 |
| ENSG00000167377 | ZNF23           | 16 | 71447597  | 71463095  | protein_coding | 9,73  | 0 |
| ENSG00000115970 | THADA           | 2  | 43230836  | 43596046  | protein_coding | 9,73  | 0 |
| ENSG00000106692 | FKTN            | 9  | 105558130 | 105641118 | protein_coding | 9,72  | 0 |
| ENSG00000198721 | ECI2            | 6  | 4115689   | 4135597   | protein_coding | 9,72  | 0 |
| ENSG00000144791 | LIMD1           | 3  | 45555394  | 45686338  | protein_coding | 9,71  | 0 |



|                 |                 |    |           |           |                |      |   |
|-----------------|-----------------|----|-----------|-----------|----------------|------|---|
| ENSG00000165923 | AGBL2           | 11 | 47659591  | 47715389  | protein_coding | 9,71 | 0 |
| ENSG00000104324 | CPQ             | 8  | 96645227  | 97149654  | protein_coding | 9,70 | 0 |
| ENSG00000213380 | COG8            | 16 | 69320140  | 69339667  | protein_coding | 9,70 | 0 |
| ENSG00000131634 | TMEM204         | 16 | 1528688   | 1555580   | protein_coding | 9,70 | 0 |
| ENSG00000273173 | SNURF           | 15 | 24954986  | 24977850  | protein_coding | 9,70 | 0 |
| ENSG00000157999 | ANKRD61         | 7  | 6031376   | 6036386   | protein_coding | 9,70 | 0 |
| ENSG00000072858 | SIDT1           | 3  | 113532296 | 113629578 | protein_coding | 9,70 | 0 |
| ENSG00000160050 | CCDC28B         | 1  | 32200386  | 32205387  | protein_coding | 9,70 | 0 |
| ENSG00000163633 | C4orf36         | 4  | 86876205  | 86936202  | protein_coding | 9,68 | 0 |
| ENSG00000188343 | FAM92A1         | 8  | 93698561  | 93731527  | protein_coding | 9,68 | 0 |
| ENSG00000144567 | FAM134A         | 2  | 219176225 | 219185479 | protein_coding | 9,67 | 0 |
| ENSG00000011143 | MKS1            | 17 | 58205437  | 58219605  | protein_coding | 9,66 | 0 |
| ENSG00000132356 | PRKAA1          | 5  | 40759379  | 40798374  | protein_coding | 9,66 | 0 |
| ENSG00000104365 | IKBKB           | 8  | 42271302  | 42332653  | protein_coding | 9,66 | 0 |
| ENSG00000126934 | MAP2K2          | 19 | 4090321   | 4124129   | protein_coding | 9,66 | 0 |
| ENSG00000053770 | AP5M1           | 14 | 57268909  | 57298742  | protein_coding | 9,65 | 0 |
| ENSG00000168255 | POLR2J3         | 7  | 102537918 | 102572656 | protein_coding | 9,65 | 0 |
| ENSG00000130751 | NPAS1           | 19 | 47019820  | 47045775  | protein_coding | 9,64 | 0 |
| ENSG00000186951 | PPARA           | 22 | 46150521  | 46243756  | protein_coding | 9,64 | 0 |
| ENSG00000273749 | CYFIP1          | 15 | 22867052  | 22981063  | protein_coding | 9,64 | 0 |
| ENSG00000125449 | ARMC7           | 17 | 75109952  | 75130265  | protein_coding | 9,64 | 0 |
| ENSG00000168887 | C2orf68         | 2  | 85606654  | 85612066  | protein_coding | 9,63 | 0 |
| ENSG00000162188 | GNG3            | 11 | 62707658  | 62709201  | protein_coding | 9,63 | 0 |
| ENSG00000152939 | MARVELD2        | 5  | 69415112  | 69444330  | protein_coding | 9,63 | 0 |
| ENSG00000135119 | RNFT2           | 12 | 116738178 | 116853631 | protein_coding | 9,63 | 0 |
| ENSG00000169964 | TMEM42          | 3  | 44861869  | 44865670  | protein_coding | 9,62 | 0 |
| ENSG00000068650 | ATP11A          | 13 | 112690329 | 112887168 | protein_coding | 9,62 | 0 |
| ENSG00000117013 | KCNQ4           | 1  | 40784012  | 40840452  | protein_coding | 9,62 | 0 |
| ENSG00000182551 | ADI1            | 2  | 3497361   | 3519736   | protein_coding | 9,62 | 0 |
| ENSG00000128250 | RFPL1           | 22 | 29438583  | 29442455  | protein_coding | 9,61 | 0 |
| ENSG00000279530 | ENSG00000279530 | 12 | 70321677  | 70324274  | protein_coding | 9,60 | 0 |
| ENSG00000154589 | LY96            | 8  | 73991352  | 74029087  | protein_coding | 9,60 | 0 |
| ENSG00000099991 | CABIN1          | 22 | 24011192  | 24178628  | protein_coding | 9,60 | 0 |
| ENSG00000070371 | CLTCL1          | 22 | 19179473  | 19291716  | protein_coding | 9,60 | 0 |
| ENSG00000068354 | TBC1D25         | X  | 48539457  | 48562609  | protein_coding | 9,59 | 0 |
| ENSG00000172590 | MRPL52          | 14 | 22829879  | 22835037  | protein_coding | 9,59 | 0 |
| ENSG00000198105 | ZNF248          | 10 | 37776526  | 37858106  | protein_coding | 9,59 | 0 |
| ENSG00000117262 | GPR89A          | 1  | 145607990 | 145670648 | protein_coding | 9,57 | 0 |
| ENSG00000060237 | WNK1            | 12 | 752593    | 911452    | protein_coding | 9,57 | 0 |
| ENSG00000129535 | NRL             | 14 | 24080107  | 24115014  | protein_coding | 9,56 | 0 |
| ENSG00000144649 | FAM198A         | 3  | 42979267  | 43060211  | protein_coding | 9,56 | 0 |
| ENSG00000119720 | NRDE2           | 14 | 90267856  | 90332137  | protein_coding | 9,55 | 0 |
| ENSG00000116171 | SCP2            | 1  | 52927229  | 53051703  | protein_coding | 9,55 | 0 |
| ENSG00000125355 | TMEM255A        | X  | 120258650 | 120311556 | protein_coding | 9,55 | 0 |
| ENSG00000154803 | FLCN            | 17 | 17212212  | 17237188  | protein_coding | 9,54 | 0 |
| ENSG00000197776 | KLHDC1          | 14 | 49693105  | 49753152  | protein_coding | 9,53 | 0 |
| ENSG00000124164 | VAPB            | 20 | 58389122  | 58451101  | protein_coding | 9,51 | 0 |
| ENSG00000239704 | CDRT4           | 17 | 15436015  | 15503608  | protein_coding | 9,50 | 0 |
| ENSG00000205669 | ACOT6           | 14 | 73610945  | 73619888  | protein_coding | 9,50 | 0 |
| ENSG00000125246 | CLYBL           | 13 | 99606669  | 99897134  | protein_coding | 9,48 | 0 |
| ENSG00000148341 | SH3GLB2         | 9  | 129007036 | 129028303 | protein_coding | 9,48 | 0 |
| ENSG00000085788 | DDHD2           | 8  | 38225218  | 38275558  | protein_coding | 9,48 | 0 |
| ENSG00000108469 | RECQL5          | 17 | 75626845  | 75667189  | protein_coding | 9,48 | 0 |
| ENSG00000155959 | VBP1            | X  | 155197007 | 155239817 | protein_coding | 9,47 | 0 |
| ENSG00000155189 | AGPAT5          | 8  | 6708357   | 6759666   | protein_coding | 9,47 | 0 |
| ENSG00000133131 | MORC4           | X  | 106813871 | 107000244 | protein_coding | 9,47 | 0 |
| ENSG00000133816 | MICAL2          | 11 | 12094008  | 12263789  | protein_coding | 9,47 | 0 |
| ENSG00000106554 | CHCHD3          | 7  | 132784868 | 133082088 | protein_coding | 9,46 | 0 |

|                 |          |    |           |           |                |      |   |
|-----------------|----------|----|-----------|-----------|----------------|------|---|
| ENSG00000158050 | DUSP2    | 2  | 96143166  | 96145440  | protein_coding | 9,46 | 0 |
| ENSG00000140043 | PTGR2    | 14 | 73851844  | 73886827  | protein_coding | 9,45 | 0 |
| ENSG00000160075 | SSU72    | 1  | 1541673   | 1574869   | protein_coding | 9,45 | 0 |
| ENSG00000141380 | SS18     | 18 | 26016253  | 26091217  | protein_coding | 9,45 | 0 |
| ENSG00000117505 | DR1      | 1  | 93345888  | 93369498  | protein_coding | 9,45 | 0 |
| ENSG00000070495 | JMID6    | 17 | 76712832  | 76726799  | protein_coding | 9,45 | 0 |
| ENSG00000141562 | NARF     | 17 | 82458180  | 82490537  | protein_coding | 9,44 | 0 |
| ENSG00000165637 | VDAC2    | 10 | 75210154  | 75231448  | protein_coding | 9,43 | 0 |
| ENSG00000204217 | BMPR2    | 2  | 202376936 | 202567751 | protein_coding | 9,43 | 0 |
| ENSG00000181982 | CCDC149  | 4  | 24806117  | 24980204  | protein_coding | 9,43 | 0 |
| ENSG00000102898 | NUTF2    | 16 | 67846732  | 67872567  | protein_coding | 9,43 | 0 |
| ENSG00000025772 | TOMM34   | 20 | 44942130  | 44960486  | protein_coding | 9,42 | 0 |
| ENSG00000138071 | ACTR2    | 2  | 65227753  | 65271253  | protein_coding | 9,41 | 0 |
| ENSG00000143257 | NR1I3    | 1  | 161229666 | 161238302 | protein_coding | 9,41 | 0 |
| ENSG00000186575 | NF2      | 22 | 29603556  | 29698598  | protein_coding | 9,41 | 0 |
| ENSG00000084072 | PPIE     | 1  | 39692182  | 39763914  | protein_coding | 9,40 | 0 |
| ENSG00000122126 | OCRL     | X  | 129539849 | 129592561 | protein_coding | 9,40 | 0 |
| ENSG00000064886 | CHI3L2   | 1  | 111200771 | 111243440 | protein_coding | 9,40 | 0 |
| ENSG00000163467 | TSACC    | 1  | 156337314 | 156346995 | protein_coding | 9,40 | 0 |
| ENSG00000148158 | SNX30    | 9  | 112750838 | 112881671 | protein_coding | 9,40 | 0 |
| ENSG00000064961 | HMG20B   | 19 | 3572777   | 3579088   | protein_coding | 9,39 | 0 |
| ENSG00000109534 | GAR1     | 4  | 109815510 | 109824740 | protein_coding | 9,38 | 0 |
| ENSG00000054116 | TRAPPC3  | 1  | 36136570  | 36156053  | protein_coding | 9,37 | 0 |
| ENSG00000162813 | BPNT1    | 1  | 220057482 | 220090462 | protein_coding | 9,37 | 0 |
| ENSG00000187860 | CCDC157  | 22 | 30356635  | 30378658  | protein_coding | 9,37 | 0 |
| ENSG00000077097 | TOP2B    | 3  | 25597905  | 25664907  | protein_coding | 9,37 | 0 |
| ENSG00000139684 | ESD      | 13 | 46771256  | 46797232  | protein_coding | 9,37 | 0 |
| ENSG00000203872 | C6orf163 | 6  | 87344849  | 87365463  | protein_coding | 9,36 | 0 |
| ENSG00000183172 | SMDT1    | 22 | 42079691  | 42084284  | protein_coding | 9,36 | 0 |
| ENSG00000094880 | CDC23    | 5  | 138187648 | 138213343 | protein_coding | 9,35 | 0 |
| ENSG00000111057 | KRT18    | 12 | 52948871  | 52952901  | protein_coding | 9,34 | 0 |
| ENSG00000167208 | SNX20    | 16 | 50666300  | 50681353  | protein_coding | 9,33 | 0 |
| ENSG00000151491 | EPS8     | 12 | 15620158  | 15882329  | protein_coding | 9,33 | 0 |
| ENSG00000141542 | RAB40B   | 17 | 82654973  | 82698728  | protein_coding | 9,33 | 0 |
| ENSG00000103510 | KAT8     | 16 | 31115754  | 31131393  | protein_coding | 9,32 | 0 |
| ENSG00000135407 | AVIL     | 12 | 57797376  | 57818704  | protein_coding | 9,32 | 0 |
| ENSG00000198945 | L3MBTL3  | 6  | 130013699 | 130141451 | protein_coding | 9,32 | 0 |
| ENSG00000160691 | SHC1     | 1  | 154962298 | 154974395 | protein_coding | 9,31 | 0 |
| ENSG00000116898 | MRPS15   | 1  | 36455718  | 36464437  | protein_coding | 9,31 | 0 |
| ENSG00000196865 | NHLRC2   | 10 | 113854661 | 113917194 | protein_coding | 9,31 | 0 |
| ENSG00000112305 | SMAP1    | 6  | 70667776  | 70862015  | protein_coding | 9,30 | 0 |
| ENSG00000165288 | BRWD3    | X  | 80670854  | 80809688  | protein_coding | 9,30 | 0 |
| ENSG00000104804 | TULP2    | 19 | 48880965  | 48898733  | protein_coding | 9,30 | 0 |
| ENSG00000082293 | COL19A1  | 6  | 69866571  | 70209976  | protein_coding | 9,30 | 0 |
| ENSG00000186007 | LEMD1    | 1  | 205381378 | 205457091 | protein_coding | 9,30 | 0 |
| ENSG00000117899 | MESDC2   | 15 | 80946289  | 80989878  | protein_coding | 9,28 | 0 |
| ENSG00000113742 | CPEB4    | 5  | 173888280 | 173961976 | protein_coding | 9,28 | 0 |
| ENSG00000278845 | MRPL45   | 17 | 38297023  | 38323218  | protein_coding | 9,28 | 0 |
| ENSG00000163803 | PLB1     | 2  | 28457145  | 28643788  | protein_coding | 9,27 | 0 |
| ENSG00000182612 | TSPAN10  | 17 | 81637171  | 81648749  | protein_coding | 9,27 | 0 |
| ENSG00000161217 | PCYT1A   | 3  | 196214222 | 196287957 | protein_coding | 9,27 | 0 |
| ENSG00000072518 | MARK2    | 11 | 63838928  | 63911019  | protein_coding | 9,26 | 0 |
| ENSG00000158555 | GDPD5    | 11 | 75434640  | 75525903  | protein_coding | 9,25 | 0 |
| ENSG00000111196 | MAGOHB   | 12 | 10604190  | 10613623  | protein_coding | 9,25 | 0 |
| ENSG00000106952 | TNFSF8   | 9  | 114893343 | 114930595 | protein_coding | 9,25 | 0 |
| ENSG00000178607 | ERN1     | 17 | 64039142  | 64130819  | protein_coding | 9,25 | 0 |
| ENSG00000103932 | RPAP1    | 15 | 41517176  | 41544269  | protein_coding | 9,24 | 0 |
| ENSG00000136143 | SUCLA2   | 13 | 47936491  | 48001354  | protein_coding | 9,24 | 0 |

|                 |          |    |           |           |                |      |   |
|-----------------|----------|----|-----------|-----------|----------------|------|---|
| ENSG00000113194 | FAF2     | 5  | 176447628 | 176510074 | protein_coding | 9,24 | 0 |
| ENSG00000147162 | OGT      | X  | 71533083  | 71575897  | protein_coding | 9,24 | 0 |
| ENSG00000183778 | B3GALT5  | 21 | 39556442  | 39673137  | protein_coding | 9,23 | 0 |
| ENSG00000009335 | UBE3C    | 7  | 157138913 | 157269372 | protein_coding | 9,21 | 0 |
| ENSG00000118058 | KMT2A    | 11 | 118436490 | 118526832 | protein_coding | 9,21 | 0 |
| ENSG00000109062 | SLC9A3R1 | 17 | 74748652  | 74769353  | protein_coding | 9,20 | 0 |
| ENSG00000070388 | FGF22    | 19 | 639879    | 644371    | protein_coding | 9,20 | 0 |
| ENSG00000196684 | HSH2D    | 19 | 16134028  | 16158575  | protein_coding | 9,20 | 0 |
| ENSG00000182580 | EPHB3    | 3  | 184561784 | 184582409 | protein_coding | 9,20 | 0 |
| ENSG00000119509 | INVS     | 9  | 100099256 | 100301000 | protein_coding | 9,20 | 0 |
| ENSG00000056586 | RC3H2    | 9  | 122844556 | 122905341 | protein_coding | 9,18 | 0 |
| ENSG00000206190 | ATP10A   | 15 | 25677273  | 25865172  | protein_coding | 9,18 | 0 |
| ENSG00000198019 | FCGR1B   | 1  | 121087345 | 121096310 | protein_coding | 9,18 | 0 |
| ENSG00000078699 | CBFA2T2  | 20 | 33490075  | 33650036  | protein_coding | 9,18 | 0 |
| ENSG00000161980 | POLR3K   | 16 | 46407     | 53628     | protein_coding | 9,18 | 0 |
| ENSG00000115963 | RND3     | 2  | 150468195 | 150539011 | protein_coding | 9,17 | 0 |
| ENSG00000163704 | PRRT3    | 3  | 9945542   | 9952394   | protein_coding | 9,17 | 0 |
| ENSG00000051620 | HEBP2    | 6  | 138403531 | 138422197 | protein_coding | 9,17 | 0 |
| ENSG00000099797 | TECR     | 19 | 14517085  | 14565980  | protein_coding | 9,17 | 0 |
| ENSG00000182831 | C16orf72 | 16 | 9091648   | 9121640   | protein_coding | 9,17 | 0 |
| ENSG00000099381 | SETD1A   | 16 | 30957294  | 30985116  | protein_coding | 9,16 | 0 |
| ENSG00000153820 | SPHKAP   | 2  | 227979950 | 228181645 | protein_coding | 9,15 | 0 |
| ENSG00000137996 | RTCA     | 1  | 100266207 | 100292769 | protein_coding | 9,15 | 0 |
| ENSG00000143514 | TP53BP2  | 1  | 223779899 | 223845972 | protein_coding | 9,15 | 0 |
| ENSG00000158161 | EYA3     | 1  | 27970344  | 28088696  | protein_coding | 9,14 | 0 |
| ENSG00000110881 | ASIC1    | 12 | 50057548  | 50083611  | protein_coding | 9,14 | 0 |
| ENSG00000117174 | ZNHIT6   | 1  | 85649423  | 85708433  | protein_coding | 9,14 | 0 |
| ENSG00000131067 | GGT7     | 20 | 34844720  | 34872860  | protein_coding | 9,14 | 0 |
| ENSG00000161677 | JOSD2    | 19 | 50505998  | 50511353  | protein_coding | 9,13 | 0 |
| ENSG00000139146 | FAM60A   | 12 | 31280584  | 31327058  | protein_coding | 9,13 | 0 |
| ENSG00000153113 | CAST     | 5  | 96525267  | 96779595  | protein_coding | 9,13 | 0 |
| ENSG00000110218 | PANX1    | 11 | 94128928  | 94181972  | protein_coding | 9,13 | 0 |
| ENSG00000164291 | ARSK     | 5  | 95555074  | 95605064  | protein_coding | 9,13 | 0 |
| ENSG00000104765 | BNIP3L   | 8  | 26382898  | 26505636  | protein_coding | 9,12 | 0 |
| ENSG00000171444 | MCC      | 5  | 113022099 | 113488830 | protein_coding | 9,11 | 0 |
| ENSG00000161647 | MPP3     | 17 | 43800799  | 43833170  | protein_coding | 9,11 | 0 |
| ENSG00000151461 | UPF2     | 10 | 11920022  | 12043170  | protein_coding | 9,10 | 0 |
| ENSG00000174951 | FUT1     | 19 | 48748011  | 48755390  | protein_coding | 9,10 | 0 |
| ENSG00000121068 | TBX2     | 17 | 61399896  | 61409466  | protein_coding | 9,10 | 0 |
| ENSG00000069764 | PLA2G10  | 16 | 14672545  | 14694669  | protein_coding | 9,10 | 0 |
| ENSG00000099834 | CDHR5    | 11 | 616565    | 626078    | protein_coding | 9,10 | 0 |
| ENSG00000108176 | DNAJC12  | 10 | 67796665  | 67838166  | protein_coding | 9,10 | 0 |
| ENSG00000225932 | CTAGE4   | 7  | 144183466 | 144186053 | protein_coding | 9,10 | 0 |
| ENSG00000113211 | PCDHB6   | 5  | 141150022 | 141153287 | protein_coding | 9,10 | 0 |
| ENSG00000253710 | ALG11    | 13 | 52012398  | 52029664  | protein_coding | 9,09 | 0 |
| ENSG00000079337 | RAPGEF3  | 12 | 47734367  | 47771040  | protein_coding | 9,09 | 0 |
| ENSG00000145087 | STXBP5L  | 3  | 120908072 | 121424761 | protein_coding | 9,09 | 0 |
| ENSG00000142252 | GEMIN7   | 19 | 45079195  | 45091524  | protein_coding | 9,09 | 0 |
| ENSG00000197937 | ZNF347   | 19 | 53124072  | 53159075  | protein_coding | 9,09 | 0 |
| ENSG00000136895 | GARNL3   | 9  | 127224265 | 127393660 | protein_coding | 9,08 | 0 |
| ENSG00000115286 | NDUFS7   | 19 | 1383527   | 1395589   | protein_coding | 9,08 | 0 |
| ENSG00000205476 | CCDC85C  | 14 | 99500180  | 99604026  | protein_coding | 9,07 | 0 |
| ENSG00000154380 | ENAH     | 1  | 225486835 | 225653142 | protein_coding | 9,07 | 0 |
| ENSG00000130227 | XPO7     | 8  | 21919671  | 22006585  | protein_coding | 9,07 | 0 |
| ENSG00000134243 | SORT1    | 1  | 109309568 | 109397951 | protein_coding | 9,07 | 0 |
| ENSG00000171067 | C11orf24 | 11 | 68261335  | 68272001  | protein_coding | 9,06 | 0 |
| ENSG00000160799 | CCDC12   | 3  | 46921726  | 46982010  | protein_coding | 9,06 | 0 |
| ENSG00000059758 | CDK17    | 12 | 96278261  | 96400560  | protein_coding | 9,06 | 0 |

|                 |          |    |           |           |                |      |   |
|-----------------|----------|----|-----------|-----------|----------------|------|---|
| ENSG0000079134  | THOC1    | 18 | 214520    | 268050    | protein_coding | 9,06 | 0 |
| ENSG00000266338 | NBPF15   | 1  | 144421386 | 144461674 | protein_coding | 9,05 | 0 |
| ENSG00000084073 | ZMPSTE24 | 1  | 40258107  | 40294184  | protein_coding | 9,05 | 0 |
| ENSG00000102796 | DHRS12   | 13 | 51767993  | 51804157  | protein_coding | 9,05 | 0 |
| ENSG00000104081 | BMF      | 15 | 40087890  | 40108892  | protein_coding | 9,05 | 0 |
| ENSG00000161267 | BDH1     | 3  | 197509783 | 197573323 | protein_coding | 9,05 | 0 |
| ENSG00000112769 | LAMA4    | 6  | 112108760 | 112254939 | protein_coding | 9,04 | 0 |
| ENSG00000125875 | TBC1D20  | 20 | 435480    | 462553    | protein_coding | 9,04 | 0 |
| ENSG00000133606 | MKRN1    | 7  | 140453040 | 140479569 | protein_coding | 9,03 | 0 |
| ENSG00000054611 | TBC1D22A | 22 | 46762617  | 47175699  | protein_coding | 9,03 | 0 |
| ENSG00000133265 | HSPBP1   | 19 | 55262231  | 55280381  | protein_coding | 9,01 | 0 |
| ENSG00000124767 | GLO1     | 6  | 38675925  | 38703141  | protein_coding | 9,01 | 0 |
| ENSG00000183401 | CCDC159  | 19 | 11344684  | 11354944  | protein_coding | 9,01 | 0 |
| ENSG00000125812 | GZF1     | 20 | 23362182  | 23373063  | protein_coding | 9,00 | 0 |
| ENSG00000140323 | DISP2    | 15 | 40358235  | 40378639  | protein_coding | 9,00 | 0 |
| ENSG00000115084 | SLC35F5  | 2  | 113705011 | 113756823 | protein_coding | 9,00 | 0 |
| ENSG00000134198 | TSPAN2   | 1  | 115048011 | 115089500 | protein_coding | 9,00 | 0 |
| ENSG00000092439 | TRPM7    | 15 | 50552473  | 50686815  | protein_coding | 9,00 | 0 |
| ENSG00000128609 | NDUFA5   | 7  | 123536997 | 123558255 | protein_coding | 9,00 | 0 |
| ENSG00000105676 | ARMC6    | 19 | 19033575  | 19060311  | protein_coding | 8,99 | 0 |
| ENSG00000130733 | YIPF2    | 19 | 10922185  | 10928681  | protein_coding | 8,98 | 0 |
| ENSG00000197223 | C1D      | 2  | 68041130  | 68110948  | protein_coding | 8,97 | 0 |
| ENSG00000123810 | B9D2     | 19 | 41354421  | 41364173  | protein_coding | 8,96 | 0 |
| ENSG00000065485 | PDIA5    | 3  | 123067062 | 123225227 | protein_coding | 8,95 | 0 |
| ENSG00000232859 | LYRM9    | 17 | 27878314  | 27894752  | protein_coding | 8,94 | 0 |
| ENSG00000240857 | RDH14    | 2  | 18554723  | 18560680  | protein_coding | 8,94 | 0 |
| ENSG00000143036 | SLC44A3  | 1  | 94820342  | 94895246  | protein_coding | 8,94 | 0 |
| ENSG00000084636 | COL16A1  | 1  | 31652247  | 31704319  | protein_coding | 8,94 | 0 |
| ENSG00000228696 | ARL17B   | 17 | 46274784  | 46361797  | protein_coding | 8,93 | 0 |
| ENSG00000182858 | ALG12    | 22 | 49900229  | 49918458  | protein_coding | 8,93 | 0 |
| ENSG00000037637 | FBXO42   | 1  | 16246839  | 16352454  | protein_coding | 8,92 | 0 |
| ENSG00000125445 | MRPS7    | 17 | 75261674  | 75266373  | protein_coding | 8,91 | 0 |
| ENSG00000205269 | TMEM170B | 6  | 11538278  | 11583524  | protein_coding | 8,90 | 0 |
| ENSG00000102854 | MSLN     | 16 | 643262    | 768865    | protein_coding | 8,90 | 0 |
| ENSG00000102962 | CCL22    | 16 | 57358772  | 57366190  | protein_coding | 8,90 | 0 |
| ENSG00000164694 | FNDC1    | 6  | 159169397 | 159272109 | protein_coding | 8,90 | 0 |
| ENSG00000172901 | LVRN     | 5  | 115962454 | 116027619 | protein_coding | 8,90 | 0 |
| ENSG00000123416 | TUBA1B   | 12 | 49127782  | 49131397  | protein_coding | 8,89 | 0 |
| ENSG00000184056 | VPS33B   | 15 | 90998416  | 91022603  | protein_coding | 8,89 | 0 |
| ENSG00000100347 | SAMM50   | 22 | 43955421  | 44010531  | protein_coding | 8,89 | 0 |
| ENSG00000168291 | PDHB     | 3  | 58427630  | 58433857  | protein_coding | 8,88 | 0 |
| ENSG00000151689 | INPP1    | 2  | 190343470 | 190371665 | protein_coding | 8,88 | 0 |
| ENSG00000129197 | RPAIN    | 17 | 5419641   | 5432876   | protein_coding | 8,87 | 0 |
| ENSG00000136044 | APPL2    | 12 | 105173296 | 105236238 | protein_coding | 8,87 | 0 |
| ENSG00000139083 | ETV6     | 12 | 11649854  | 11895402  | protein_coding | 8,87 | 0 |
| ENSG00000108424 | KPNB1    | 17 | 47649476  | 47685505  | protein_coding | 8,87 | 0 |
| ENSG00000177663 | IL17RA   | 22 | 17084954  | 17115694  | protein_coding | 8,85 | 0 |
| ENSG00000043093 | DCUN1D1  | 3  | 182938074 | 182985953 | protein_coding | 8,85 | 0 |
| ENSG00000106526 | ACTR3C   | 7  | 150243916 | 150323725 | protein_coding | 8,85 | 0 |
| ENSG00000013306 | SLC25A39 | 17 | 44319625  | 44324870  | protein_coding | 8,85 | 0 |
| ENSG00000099817 | POLR2E   | 19 | 1086579   | 1095380   | protein_coding | 8,85 | 0 |
| ENSG00000102904 | TSNAXIP1 | 16 | 67806765  | 67832148  | protein_coding | 8,84 | 0 |
| ENSG00000168701 | TMEM208  | 16 | 67227103  | 67229278  | protein_coding | 8,84 | 0 |
| ENSG00000138190 | EXOC6    | 10 | 92834713  | 93059493  | protein_coding | 8,84 | 0 |
| ENSG00000118495 | PLAGL1   | 6  | 143940300 | 144064599 | protein_coding | 8,84 | 0 |
| ENSG00000102172 | SMS      | X  | 21940573  | 21994835  | protein_coding | 8,83 | 0 |
| ENSG00000213995 | CARKD    | 13 | 110615460 | 110639993 | protein_coding | 8,82 | 0 |
| ENSG00000147127 | RAB41    | X  | 70282093  | 70285002  | protein_coding | 8,82 | 0 |

|                 |            |    |           |           |                |      |   |
|-----------------|------------|----|-----------|-----------|----------------|------|---|
| ENSG00000196305 | IARS       | 9  | 92210207  | 92293756  | protein_coding | 8,82 | 0 |
| ENSG00000173214 | KIAA1919   | 6  | 111259348 | 111271167 | protein_coding | 8,81 | 0 |
| ENSG00000103111 | MON1B      | 16 | 77190835  | 77202405  | protein_coding | 8,80 | 0 |
| ENSG00000146242 | TPBG       | 6  | 82363206  | 82370828  | protein_coding | 8,80 | 0 |
| ENSG00000132010 | ZNF20      | 19 | 12092843  | 12140407  | protein_coding | 8,80 | 0 |
| ENSG00000126353 | CCR7       | 17 | 40553769  | 40565472  | protein_coding | 8,80 | 0 |
| ENSG00000093134 | VNN3       | 6  | 132722787 | 132734765 | protein_coding | 8,80 | 0 |
| ENSG00000262209 | PCDHGB3    | 5  | 141370264 | 141512979 | protein_coding | 8,80 | 0 |
| ENSG00000109193 | SULT1E1    | 4  | 69810780  | 69860152  | protein_coding | 8,80 | 0 |
| ENSG00000120280 | CXorf21    | X  | 30558824  | 30577844  | protein_coding | 8,80 | 0 |
| ENSG00000198798 | MAGEB3     | X  | 30230436  | 30237492  | protein_coding | 8,80 | 0 |
| ENSG00000122359 | ANXA11     | 10 | 80150889  | 80205572  | protein_coding | 8,80 | 0 |
| ENSG00000155034 | FBXL18     | 7  | 5431335   | 5513798   | protein_coding | 8,79 | 0 |
| ENSG00000232838 | PET117     | 20 | 18137873  | 18143169  | protein_coding | 8,79 | 0 |
| ENSG00000008513 | ST3GAL1    | 8  | 133454848 | 133571940 | protein_coding | 8,78 | 0 |
| ENSG00000122545 | 09/01/2007 | 7  | 35800932  | 35907105  | protein_coding | 8,78 | 0 |
| ENSG00000008256 | CYTH3      | 7  | 6161776   | 6272644   | protein_coding | 8,78 | 0 |
| ENSG00000105355 | PLIN3      | 19 | 4838341   | 4867768   | protein_coding | 8,77 | 0 |
| ENSG00000183826 | BTBD9      | 6  | 38168451  | 38640148  | protein_coding | 8,76 | 0 |
| ENSG00000160298 | C21orf58   | 21 | 46300181  | 46323875  | protein_coding | 8,76 | 0 |
| ENSG00000090674 | MCOLN1     | 19 | 7522626   | 7534009   | protein_coding | 8,74 | 0 |
| ENSG00000205832 | C16orf96   | 16 | 4556490   | 4600714   | protein_coding | 8,73 | 0 |
| ENSG00000166401 | SERPINB8   | 18 | 63969925  | 64005667  | protein_coding | 8,72 | 0 |
| ENSG00000170364 | SETMAR     | 3  | 4303304   | 4317567   | protein_coding | 8,72 | 0 |
| ENSG00000158158 | CNNM4      | 2  | 96760902  | 96811891  | protein_coding | 8,72 | 0 |
| ENSG00000178177 | LCORL      | 4  | 17841199  | 18021876  | protein_coding | 8,72 | 0 |
| ENSG00000125447 | GGA3       | 17 | 75236599  | 75262363  | protein_coding | 8,71 | 0 |
| ENSG00000124496 | TRERF1     | 6  | 42224931  | 42452051  | protein_coding | 8,71 | 0 |
| ENSG00000135686 | KLHL36     | 16 | 84648525  | 84667686  | protein_coding | 8,71 | 0 |
| ENSG00000110925 | CSRNP2     | 12 | 51061205  | 51083664  | protein_coding | 8,70 | 0 |
| ENSG00000198597 | ZNF536     | 19 | 30228290  | 30713538  | protein_coding | 8,70 | 0 |
| ENSG00000180316 | PNPLA1     | 6  | 36243203  | 36308595  | protein_coding | 8,70 | 0 |
| ENSG00000180891 | CUEDC1     | 17 | 57861243  | 57955323  | protein_coding | 8,69 | 0 |
| ENSG00000166912 | MTMR10     | 15 | 30938941  | 30991607  | protein_coding | 8,69 | 0 |
| ENSG00000141040 | ZNF287     | 17 | 16551387  | 16569206  | protein_coding | 8,69 | 0 |
| ENSG00000242485 | MRPL20     | 1  | 1401908   | 1407313   | protein_coding | 8,68 | 0 |
| ENSG00000120314 | WDR55      | 5  | 140664676 | 140674124 | protein_coding | 8,68 | 0 |
| ENSG00000168434 | COG7       | 16 | 23388493  | 23453180  | protein_coding | 8,67 | 0 |
| ENSG00000084774 | CAD        | 2  | 27217390  | 27243943  | protein_coding | 8,67 | 0 |
| ENSG00000086598 | TMED2      | 12 | 123584531 | 123598577 | protein_coding | 8,66 | 0 |
| ENSG00000122484 | RPAP2      | 1  | 92298965  | 92402056  | protein_coding | 8,65 | 0 |
| ENSG00000165060 | FXN        | 9  | 69035259  | 69100178  | protein_coding | 8,65 | 0 |
| ENSG00000127914 | AKAP9      | 7  | 91940867  | 92110673  | protein_coding | 8,65 | 0 |
| ENSG00000188234 | AGAP4      | 10 | 45825594  | 45853875  | protein_coding | 8,65 | 0 |
| ENSG00000204628 | GNB2L1     | 5  | 181236909 | 181248096 | protein_coding | 8,63 | 0 |
| ENSG00000137106 | GRHPR      | 9  | 37422666  | 37436990  | protein_coding | 8,63 | 0 |
| ENSG00000105186 | ANKRD27    | 19 | 32597007  | 32676597  | protein_coding | 8,63 | 0 |
| ENSG00000138678 | GPAT3      | 4  | 83535914  | 83605875  | protein_coding | 8,62 | 0 |
| ENSG00000256229 | ZNF486     | 19 | 20167228  | 20200490  | protein_coding | 8,61 | 0 |
| ENSG00000165325 | CCDC67     | 11 | 93329971  | 93438487  | protein_coding | 8,60 | 0 |
| ENSG00000158683 | PKD1L1     | 7  | 47774652  | 47948491  | protein_coding | 8,60 | 0 |
| ENSG00000163221 | S100A12    | 1  | 153373706 | 153375649 | protein_coding | 8,60 | 0 |
| ENSG00000111269 | CREBL2     | 12 | 12611827  | 12645108  | protein_coding | 8,60 | 0 |
| ENSG00000148337 | CIZ1       | 9  | 128166064 | 128204383 | protein_coding | 8,60 | 0 |
| ENSG00000073792 | IGF2BP2    | 3  | 185643739 | 185825056 | protein_coding | 8,59 | 0 |
| ENSG00000086102 | NFX1       | 9  | 33290511  | 33371157  | protein_coding | 8,59 | 0 |
| ENSG00000261236 | BOP1       | 8  | 144262102 | 144291370 | protein_coding | 8,59 | 0 |
| ENSG00000196975 | ANXA4      | 2  | 69644425  | 69827100  | protein_coding | 8,58 | 0 |

|                 |           |    |           |           |                |      |   |
|-----------------|-----------|----|-----------|-----------|----------------|------|---|
| ENSG0000053524  | MCF2L2    | 3  | 183178043 | 183428778 | protein_coding | 8,58 | 0 |
| ENSG00000112144 | ICK       | 6  | 53001279  | 53061802  | protein_coding | 8,57 | 0 |
| ENSG00000134490 | TMEM241   | 18 | 23197144  | 23437961  | protein_coding | 8,57 | 0 |
| ENSG00000103034 | NDRG4     | 16 | 58462846  | 58513628  | protein_coding | 8,57 | 0 |
| ENSG00000167740 | CYB5D2    | 17 | 4143168   | 4187310   | protein_coding | 8,56 | 0 |
| ENSG00000147224 | PRPS1     | X  | 107628424 | 107651026 | protein_coding | 8,56 | 0 |
| ENSG00000138495 | COX17     | 3  | 119654513 | 119677454 | protein_coding | 8,56 | 0 |
| ENSG00000163219 | ARHGAP25  | 2  | 68679601  | 68826833  | protein_coding | 8,56 | 0 |
| ENSG00000065613 | SLK       | 10 | 103967201 | 104029233 | protein_coding | 8,56 | 0 |
| ENSG00000198934 | MAGEE1    | X  | 76427724  | 76431353  | protein_coding | 8,55 | 0 |
| ENSG00000260916 | CCPG1     | 15 | 55340032  | 55408510  | protein_coding | 8,55 | 0 |
| ENSG00000176994 | SMCR8     | 17 | 18315310  | 18328055  | protein_coding | 8,55 | 0 |
| ENSG00000204536 | CCHCR1    | 6  | 31142439  | 31158238  | protein_coding | 8,54 | 0 |
| ENSG00000104131 | EIF3J     | 15 | 44537057  | 44563029  | protein_coding | 8,54 | 0 |
| ENSG00000129195 | FAM64A    | 17 | 6444415   | 6451469   | protein_coding | 8,54 | 0 |
| ENSG00000135070 | ISCA1     | 9  | 86264546  | 86282538  | protein_coding | 8,54 | 0 |
| ENSG00000018510 | AGPS      | 2  | 177392644 | 177543836 | protein_coding | 8,53 | 0 |
| ENSG00000058056 | USP13     | 3  | 179652755 | 179789401 | protein_coding | 8,53 | 0 |
| ENSG00000114353 | GNAI2     | 3  | 50226292  | 50259355  | protein_coding | 8,53 | 0 |
| ENSG00000135862 | LAMC1     | 1  | 183023460 | 183145592 | protein_coding | 8,53 | 0 |
| ENSG00000131051 | RBM39     | 20 | 35703609  | 35742312  | protein_coding | 8,52 | 0 |
| ENSG00000149932 | TMEM219   | 16 | 29940885  | 29973052  | protein_coding | 8,52 | 0 |
| ENSG00000113013 | HSPA9     | 5  | 138554882 | 138575444 | protein_coding | 8,50 | 0 |
| ENSG00000077984 | CST7      | 20 | 24949230  | 24959928  | protein_coding | 8,50 | 0 |
| ENSG00000092051 | JPH4      | 14 | 23568035  | 23578800  | protein_coding | 8,50 | 0 |
| ENSG00000119714 | GPR68     | 14 | 91232532  | 91253925  | protein_coding | 8,50 | 0 |
| ENSG00000203666 | EFCAB2    | 1  | 244969705 | 245127164 | protein_coding | 8,50 | 0 |
| ENSG00000167632 | TRAPPC9   | 8  | 139730343 | 140458579 | protein_coding | 8,48 | 0 |
| ENSG00000122203 | KIAA1191  | 5  | 176346061 | 176361968 | protein_coding | 8,48 | 0 |
| ENSG00000204611 | ZNF616    | 19 | 52113091  | 52139922  | protein_coding | 8,47 | 0 |
| ENSG00000105127 | AKAP8     | 19 | 15353385  | 15379798  | protein_coding | 8,47 | 0 |
| ENSG00000161714 | PLCD3     | 17 | 45108967  | 45133354  | protein_coding | 8,46 | 0 |
| ENSG00000155380 | SLC16A1   | 1  | 112911847 | 112957013 | protein_coding | 8,46 | 0 |
| ENSG00000104976 | SNAPC2    | 19 | 7920316   | 7923250   | protein_coding | 8,46 | 0 |
| ENSG00000104886 | PLEKHJ1   | 19 | 2230084   | 2237704   | protein_coding | 8,46 | 0 |
| ENSG00000181135 | ZNF707    | 8  | 143684452 | 143713898 | protein_coding | 8,46 | 0 |
| ENSG00000070526 | ST6GALNAC | 17 | 76624761  | 76643838  | protein_coding | 8,45 | 0 |
| ENSG00000189180 | ZNF33A    | 10 | 38010650  | 38065088  | protein_coding | 8,45 | 0 |
| ENSG00000165731 | RET       | 10 | 43077027  | 43130351  | protein_coding | 8,45 | 0 |
| ENSG00000144566 | RAB5A     | 3  | 19947079  | 19985175  | protein_coding | 8,45 | 0 |
| ENSG00000080815 | PSEN1     | 14 | 73136418  | 73223691  | protein_coding | 8,45 | 0 |
| ENSG00000009413 | REV3L     | 6  | 111299028 | 111483715 | protein_coding | 8,44 | 0 |
| ENSG00000141577 | CEP131    | 17 | 81189593  | 81222999  | protein_coding | 8,44 | 0 |
| ENSG00000183808 | RBM12B    | 8  | 93729356  | 93741017  | protein_coding | 8,44 | 0 |
| ENSG00000166947 | EPB42     | 15 | 43106225  | 43221283  | protein_coding | 8,43 | 0 |
| ENSG00000172939 | OXSR1     | 3  | 38165089  | 38255488  | protein_coding | 8,43 | 0 |
| ENSG00000144029 | MRPS5     | 2  | 95087207  | 95149434  | protein_coding | 8,43 | 0 |
| ENSG00000126785 | RHOJ      | 14 | 63204114  | 63293219  | protein_coding | 8,42 | 0 |
| ENSG00000118454 | ANKRD13C  | 1  | 70260588  | 70354734  | protein_coding | 8,41 | 0 |
| ENSG00000140022 | STON2     | 14 | 81260656  | 81436465  | protein_coding | 8,41 | 0 |
| ENSG00000125821 | DTD1      | 20 | 18567453  | 18763917  | protein_coding | 8,41 | 0 |
| ENSG00000175220 | ARHGAP1   | 11 | 46677080  | 46700615  | protein_coding | 8,41 | 0 |
| ENSG00000171236 | LRG1      | 19 | 4536409   | 4540474   | protein_coding | 8,41 | 0 |
| ENSG00000002549 | LAP3      | 4  | 17577192  | 17607972  | protein_coding | 8,41 | 0 |
| ENSG00000126214 | KLC1      | 14 | 103561896 | 103714249 | protein_coding | 8,40 | 0 |
| ENSG00000105855 | ITGB8     | 7  | 20330702  | 20415754  | protein_coding | 8,40 | 0 |
| ENSG00000171861 | RNMTL1    | 17 | 782273    | 792509    | protein_coding | 8,40 | 0 |
| ENSG00000133275 | CSNK1G2   | 19 | 1941149   | 1981338   | protein_coding | 8,40 | 0 |

|                 |                 |    |           |           |                |      |   |
|-----------------|-----------------|----|-----------|-----------|----------------|------|---|
| ENSG0000010310  | GIPR            | 19 | 45668244  | 45683724  | protein_coding | 8,40 | 0 |
| ENSG00000213203 | GIMAP1          | 7  | 150716557 | 150724284 | protein_coding | 8,40 | 0 |
| ENSG00000074276 | CDHR2           | 5  | 176542511 | 176595974 | protein_coding | 8,40 | 0 |
| ENSG00000145687 | SSBP2           | 5  | 81413021  | 81751797  | protein_coding | 8,39 | 0 |
| ENSG00000120071 | KANSL1          | 17 | 46029916  | 46225374  | protein_coding | 8,39 | 0 |
| ENSG00000106351 | AGFG2           | 7  | 100539211 | 100568219 | protein_coding | 8,39 | 0 |
| ENSG00000279767 | ENSG00000279767 | 1  | 153772371 | 153774079 | protein_coding | 8,38 | 0 |
| ENSG00000186716 | BCR             | 22 | 23179704  | 23318037  | protein_coding | 8,38 | 0 |
| ENSG00000075415 | SLC25A3         | 12 | 98593591  | 98606379  | protein_coding | 8,37 | 0 |
| ENSG00000109189 | USP46           | 4  | 52590972  | 52659335  | protein_coding | 8,37 | 0 |
| ENSG00000198830 | HMG2            | 1  | 26472450  | 26475972  | protein_coding | 8,36 | 0 |
| ENSG00000253958 | CLDN23          | 8  | 8701938   | 8704106   | protein_coding | 8,36 | 0 |
| ENSG00000119878 | CRIP1           | 2  | 46616416  | 46625742  | protein_coding | 8,35 | 0 |
| ENSG00000130669 | PAK4            | 19 | 39125770  | 39182816  | protein_coding | 8,35 | 0 |
| ENSG00000132300 | PTCD3           | 2  | 86106182  | 86142157  | protein_coding | 8,35 | 0 |
| ENSG00000185728 | YTHDF3          | 8  | 63168553  | 63212786  | protein_coding | 8,35 | 0 |
| ENSG00000121350 | PYROXD1         | 12 | 21437615  | 21471252  | protein_coding | 8,34 | 0 |
| ENSG00000165675 | ENOX2           | X  | 130623369 | 130903317 | protein_coding | 8,32 | 0 |
| ENSG00000135677 | GNS             | 12 | 64713445  | 64759447  | protein_coding | 8,30 | 0 |
| ENSG00000177191 | B3GNT8          | 19 | 41425359  | 41428730  | protein_coding | 8,30 | 0 |
| ENSG00000136514 | RTP4            | 3  | 187368332 | 187372076 | protein_coding | 8,30 | 0 |
| ENSG00000156990 | RPUSD3          | 3  | 9837849   | 9844602   | protein_coding | 8,29 | 0 |
| ENSG00000162368 | CMPK1           | 1  | 47333797  | 47378839  | protein_coding | 8,28 | 0 |
| ENSG00000196510 | ANAPC7          | 12 | 110372900 | 110403730 | protein_coding | 8,28 | 0 |
| ENSG00000163013 | FBXO41          | 2  | 73254682  | 73284431  | protein_coding | 8,28 | 0 |
| ENSG00000144824 | PHLDB2          | 3  | 111732497 | 111976517 | protein_coding | 8,28 | 0 |
| ENSG00000148832 | PAOX            | 10 | 133379234 | 133391694 | protein_coding | 8,28 | 0 |
| ENSG00000022567 | SLC45A4         | 8  | 141207166 | 141308305 | protein_coding | 8,27 | 0 |
| ENSG00000151014 | NOCT            | 4  | 139015789 | 139045939 | protein_coding | 8,27 | 0 |
| ENSG00000167969 | ECI1            | 16 | 2239395   | 2252300   | protein_coding | 8,27 | 0 |
| ENSG00000119402 | FBXW2           | 9  | 120751978 | 120793412 | protein_coding | 8,25 | 0 |
| ENSG00000197111 | PCBP2           | 12 | 53452102  | 53481162  | protein_coding | 8,25 | 0 |
| ENSG00000144021 | CIAO1           | 2  | 96266132  | 96273349  | protein_coding | 8,24 | 0 |
| ENSG00000083067 | TRPM3           | 9  | 70529063  | 71446904  | protein_coding | 8,24 | 0 |
| ENSG00000106785 | TRIM14          | 9  | 98069275  | 98119212  | protein_coding | 8,23 | 0 |
| ENSG00000179115 | FARSA           | 19 | 12922479  | 12934037  | protein_coding | 8,23 | 0 |
| ENSG00000149476 | TKFC            | 11 | 61333210  | 61353295  | protein_coding | 8,22 | 0 |
| ENSG00000143786 | CNIH3           | 1  | 224434660 | 224740549 | protein_coding | 8,22 | 0 |
| ENSG00000180357 | ZNF609          | 15 | 64460742  | 64686068  | protein_coding | 8,22 | 0 |
| ENSG00000188529 | SRSF10          | 1  | 23964804  | 23980927  | protein_coding | 8,22 | 0 |
| ENSG00000177084 | POLE            | 12 | 132623753 | 132687365 | protein_coding | 8,21 | 0 |
| ENSG00000170653 | ATF7            | 12 | 53507856  | 53626410  | protein_coding | 8,21 | 0 |
| ENSG00000147592 | LACTB2          | 8  | 70635318  | 70669174  | protein_coding | 8,21 | 0 |
| ENSG00000127533 | F2RL3           | 19 | 16888860  | 16892606  | protein_coding | 8,20 | 0 |
| ENSG00000111540 | RAB5B           | 12 | 55973913  | 55996683  | protein_coding | 8,20 | 0 |
| ENSG00000114999 | TTL             | 2  | 112482154 | 112541739 | protein_coding | 8,20 | 0 |
| ENSG00000102893 | PHKB            | 16 | 47461123  | 47701523  | protein_coding | 8,20 | 0 |
| ENSG00000163956 | LRPAP1          | 4  | 3506376   | 3532559   | protein_coding | 8,20 | 0 |
| ENSG00000198795 | ZNF521          | 18 | 25061926  | 25352190  | protein_coding | 8,19 | 0 |
| ENSG00000123352 | SPATS2          | 12 | 49366584  | 49527424  | protein_coding | 8,19 | 0 |
| ENSG00000120992 | LYPLA1          | 8  | 54046367  | 54102017  | protein_coding | 8,18 | 0 |
| ENSG00000033327 | GAB2            | 11 | 78215297  | 78418348  | protein_coding | 8,18 | 0 |
| ENSG00000116539 | ASH1L           | 1  | 155335268 | 155562807 | protein_coding | 8,17 | 0 |
| ENSG00000102595 | UGGT2           | 13 | 95801580  | 96053482  | protein_coding | 8,17 | 0 |
| ENSG00000125484 | GTF3C4          | 9  | 132670035 | 132694955 | protein_coding | 8,17 | 0 |
| ENSG00000164010 | ERMAP           | 1  | 42817124  | 42844989  | protein_coding | 8,16 | 0 |
| ENSG00000168374 | ARF4            | 3  | 57571363  | 57598220  | protein_coding | 8,16 | 0 |
| ENSG00000133065 | SLC41A1         | 1  | 205789093 | 205813748 | protein_coding | 8,16 | 0 |

|                 |           |    |           |           |                |      |   |
|-----------------|-----------|----|-----------|-----------|----------------|------|---|
| ENSG00000100852 | ARHGAP5   | 14 | 32076114  | 32159728  | protein_coding | 8,15 | 0 |
| ENSG00000105176 | URI1      | 19 | 29923644  | 30016608  | protein_coding | 8,15 | 0 |
| ENSG00000005893 | LAMP2     | X  | 120427827 | 120469365 | protein_coding | 8,15 | 0 |
| ENSG00000107164 | FUBP3     | 9  | 130578965 | 130638352 | protein_coding | 8,15 | 0 |
| ENSG00000131061 | ZNF341    | 20 | 33731657  | 33792269  | protein_coding | 8,14 | 0 |
| ENSG00000109016 | DHRS7B    | 17 | 21123364  | 21193265  | protein_coding | 8,14 | 0 |
| ENSG00000118292 | C1orf54   | 1  | 150268200 | 150280916 | protein_coding | 8,13 | 0 |
| ENSG00000166123 | GPT2      | 16 | 46884378  | 46931297  | protein_coding | 8,13 | 0 |
| ENSG00000143183 | TMCO1     | 1  | 165724293 | 165827755 | protein_coding | 8,13 | 0 |
| ENSG00000243646 | IL10RB    | 21 | 33266358  | 33297234  | protein_coding | 8,11 | 0 |
| ENSG00000125780 | TGM3      | 20 | 2296001   | 2341078   | protein_coding | 8,10 | 0 |
| ENSG00000173868 | PHOSPHO1  | 17 | 49223362  | 49230766  | protein_coding | 8,10 | 0 |
| ENSG00000198851 | CD3E      | 11 | 118304545 | 118316175 | protein_coding | 8,10 | 0 |
| ENSG00000152763 | WDR78     | 1  | 66812885  | 66924887  | protein_coding | 8,10 | 0 |
| ENSG00000148680 | HTR7      | 10 | 90740823  | 90857698  | protein_coding | 8,09 | 0 |
| ENSG00000196867 | ZFP28     | 19 | 56538948  | 56556810  | protein_coding | 8,09 | 0 |
| ENSG00000167232 | ZNF91     | 19 | 23304991  | 23395560  | protein_coding | 8,09 | 0 |
| ENSG00000089053 | ANAPC5    | 12 | 121308245 | 121399896 | protein_coding | 8,09 | 0 |
| ENSG00000130635 | COL5A1    | 9  | 134641774 | 134844843 | protein_coding | 8,09 | 0 |
| ENSG00000083857 | FAT1      | 4  | 186587783 | 186726722 | protein_coding | 8,08 | 0 |
| ENSG00000168259 | DNAJC7    | 17 | 41976433  | 42021376  | protein_coding | 8,08 | 0 |
| ENSG00000099995 | SF3A1     | 22 | 30331988  | 30356947  | protein_coding | 8,08 | 0 |
| ENSG00000107560 | RAB11FIP2 | 10 | 118004916 | 118046603 | protein_coding | 8,07 | 0 |
| ENSG00000100060 | MFNG      | 22 | 37469063  | 37486401  | protein_coding | 8,07 | 0 |
| ENSG00000130489 | SCO2      | 22 | 50523568  | 50526439  | protein_coding | 8,07 | 0 |
| ENSG00000184083 | FAM120C   | X  | 54068324  | 54183281  | protein_coding | 8,06 | 0 |
| ENSG00000164338 | UTP15     | 5  | 73565443  | 73583377  | protein_coding | 8,06 | 0 |
| ENSG00000150760 | DOCK1     | 10 | 126905409 | 127452517 | protein_coding | 8,06 | 0 |
| ENSG00000105650 | PDE4C     | 19 | 18207961  | 18255419  | protein_coding | 8,06 | 0 |
| ENSG00000055211 | GINM1     | 6  | 149566294 | 149591748 | protein_coding | 8,06 | 0 |
| ENSG00000133195 | SLC39A11  | 17 | 72645949  | 73092712  | protein_coding | 8,05 | 0 |
| ENSG00000101298 | SNPH      | 20 | 1266316   | 1309328   | protein_coding | 8,05 | 0 |
| ENSG00000178917 | ZNF852    | 3  | 44498970  | 44510640  | protein_coding | 8,05 | 0 |
| ENSG00000050820 | BCAR1     | 16 | 75228187  | 75268053  | protein_coding | 8,05 | 0 |
| ENSG00000078687 | TNRC6C    | 17 | 78004168  | 78108835  | protein_coding | 8,05 | 0 |
| ENSG00000129083 | COPB1     | 11 | 14443440  | 14500027  | protein_coding | 8,04 | 0 |
| ENSG00000023041 | ZDHHC6    | 10 | 112424428 | 112446917 | protein_coding | 8,04 | 0 |
| ENSG00000135049 | AGTPBP1   | 9  | 85546539  | 85742029  | protein_coding | 8,03 | 0 |
| ENSG00000168137 | SETD5     | 3  | 9397615   | 9479240   | protein_coding | 8,03 | 0 |
| ENSG00000152904 | GGPS1     | 1  | 235327350 | 235344532 | protein_coding | 8,03 | 0 |
| ENSG00000125966 | MMP24     | 20 | 35226654  | 35277000  | protein_coding | 8,02 | 0 |
| ENSG00000198131 | ZNF544    | 19 | 58228594  | 58277495  | protein_coding | 8,02 | 0 |
| ENSG00000115234 | SNX17     | 2  | 27370496  | 27377533  | protein_coding | 8,02 | 0 |
| ENSG00000214756 | METTL12   | 11 | 62665309  | 62668496  | protein_coding | 8,02 | 0 |
| ENSG00000154642 | C21orf91  | 21 | 17788967  | 17819386  | protein_coding | 8,02 | 0 |
| ENSG00000198482 | ZNF808    | 19 | 52527652  | 52564464  | protein_coding | 8,02 | 0 |
| ENSG00000170471 | RALGAPB   | 20 | 38472816  | 38578861  | protein_coding | 8,01 | 0 |
| ENSG00000148459 | PDSS1     | 10 | 26697659  | 26746798  | protein_coding | 8,01 | 0 |
| ENSG00000158710 | TAGLN2    | 1  | 159918107 | 159925732 | protein_coding | 8,01 | 0 |
| ENSG00000185344 | ATP6VOA2  | 12 | 123712318 | 123761755 | protein_coding | 8,00 | 0 |
| ENSG00000122224 | LY9       | 1  | 160796074 | 160828261 | protein_coding | 8,00 | 0 |
| ENSG00000133048 | CHI3L1    | 1  | 203178931 | 203186749 | protein_coding | 8,00 | 0 |
| ENSG00000136630 | HLX       | 1  | 220879400 | 220885059 | protein_coding | 8,00 | 0 |
| ENSG00000198879 | SFMBT2    | 10 | 7158624   | 7411486   | protein_coding | 8,00 | 0 |
| ENSG00000092330 | TINF2     | 14 | 24239643  | 24242674  | protein_coding | 7,99 | 0 |
| ENSG00000077150 | NFKB2     | 10 | 102394110 | 102402529 | protein_coding | 7,99 | 0 |
| ENSG00000197822 | OCLN      | 5  | 69492292  | 69558104  | protein_coding | 7,98 | 0 |
| ENSG00000072506 | HSD17B10  | X  | 53431258  | 53434373  | protein_coding | 7,98 | 0 |



|                 |          |    |           |           |                |      |   |
|-----------------|----------|----|-----------|-----------|----------------|------|---|
| ENSG00000128050 | PAICS    | 4  | 56435741  | 56464579  | protein_coding | 7,97 | 0 |
| ENSG00000185664 | PMEL     | 12 | 55954105  | 55973317  | protein_coding | 7,97 | 0 |
| ENSG00000171606 | ZNF274   | 19 | 58183029  | 58213562  | protein_coding | 7,97 | 0 |
| ENSG00000183255 | PTTG1IP  | 21 | 44849585  | 44873903  | protein_coding | 7,97 | 0 |
| ENSG00000108100 | CCNY     | 10 | 35247025  | 35572669  | protein_coding | 7,97 | 0 |
| ENSG00000175106 | TVP23C   | 17 | 15502264  | 15563595  | protein_coding | 7,96 | 0 |
| ENSG00000102897 | LYRM1    | 16 | 20899868  | 20925006  | protein_coding | 7,96 | 0 |
| ENSG00000138382 | METTL5   | 2  | 169810081 | 169824931 | protein_coding | 7,96 | 0 |
| ENSG00000150477 | KIAA1328 | 18 | 36829106  | 37232172  | protein_coding | 7,96 | 0 |
| ENSG00000137193 | PIM1     | 6  | 37170203  | 37175426  | protein_coding | 7,96 | 0 |
| ENSG00000130414 | NDUFA10  | 2  | 239892450 | 240025402 | protein_coding | 7,96 | 0 |
| ENSG00000125970 | RALY     | 20 | 33993646  | 34108308  | protein_coding | 7,95 | 0 |
| ENSG00000108256 | NUFIP2   | 17 | 29255836  | 29294118  | protein_coding | 7,95 | 0 |
| ENSG00000067606 | PRKCZ    | 1  | 2050470   | 2185395   | protein_coding | 7,95 | 0 |
| ENSG00000125122 | LRRC29   | 16 | 67207139  | 67227048  | protein_coding | 7,94 | 0 |
| ENSG00000157014 | TATDN2   | 3  | 10248023  | 10281218  | protein_coding | 7,94 | 0 |
| ENSG00000162595 | DIRAS3   | 1  | 68045962  | 68051631  | protein_coding | 7,94 | 0 |
| ENSG00000180628 | PCGF5    | 10 | 91163012  | 91284331  | protein_coding | 7,93 | 0 |
| ENSG00000184408 | KCND2    | 7  | 120273668 | 120750331 | protein_coding | 7,93 | 0 |
| ENSG00000164951 | PDP1     | 8  | 93857807  | 93926066  | protein_coding | 7,92 | 0 |
| ENSG00000169976 | SF3B5    | 6  | 144094881 | 144095573 | protein_coding | 7,92 | 0 |
| ENSG00000254999 | BRK1     | 3  | 10115592  | 10127190  | protein_coding | 7,92 | 0 |
| ENSG00000090520 | DNAJB11  | 3  | 186567403 | 186597203 | protein_coding | 7,92 | 0 |
| ENSG00000198538 | ZNF28    | 19 | 52797409  | 52857600  | protein_coding | 7,91 | 0 |
| ENSG00000130402 | ACTN4    | 19 | 38647649  | 38731583  | protein_coding | 7,91 | 0 |
| ENSG00000080371 | RAB21    | 12 | 71754874  | 71800285  | protein_coding | 7,91 | 0 |
| ENSG00000113643 | RARS     | 5  | 168486445 | 168519299 | protein_coding | 7,91 | 0 |
| ENSG00000255561 | FDXACB1  | 11 | 111874056 | 111881243 | protein_coding | 7,91 | 0 |
| ENSG00000172354 | GNB2     | 7  | 100673531 | 100679174 | protein_coding | 7,90 | 0 |
| ENSG00000169181 | GSG1L    | 16 | 27787535  | 28063509  | protein_coding | 7,90 | 0 |
| ENSG00000156127 | BATF     | 14 | 75522425  | 75547015  | protein_coding | 7,90 | 0 |
| ENSG00000255112 | CHMP1B   | 18 | 11851396  | 11854449  | protein_coding | 7,90 | 0 |
| ENSG00000073331 | ALPK1    | 4  | 112285509 | 112442620 | protein_coding | 7,88 | 0 |
| ENSG00000184182 | UBE2F    | 2  | 237966827 | 238042782 | protein_coding | 7,88 | 0 |
| ENSG00000080839 | RBL1     | 20 | 36996349  | 37095995  | protein_coding | 7,87 | 0 |
| ENSG00000040531 | CTNS     | 17 | 3636468   | 3661542   | protein_coding | 7,87 | 0 |
| ENSG00000196642 | RABL6    | 9  | 136807943 | 136957733 | protein_coding | 7,86 | 0 |
| ENSG00000108433 | GOSR2    | 17 | 46923117  | 46967019  | protein_coding | 7,86 | 0 |
| ENSG00000153395 | LPCAT1   | 5  | 1456480   | 1523977   | protein_coding | 7,85 | 0 |
| ENSG00000141429 | GALNT1   | 18 | 35581117  | 35711834  | protein_coding | 7,85 | 0 |
| ENSG00000164199 | ADGRV1   | 5  | 90529344  | 91164221  | protein_coding | 7,85 | 0 |
| ENSG00000103047 | TANGO6   | 16 | 68843604  | 69085180  | protein_coding | 7,83 | 0 |
| ENSG00000123124 | WWP1     | 8  | 86342738  | 86478420  | protein_coding | 7,83 | 0 |
| ENSG00000146416 | AIG1     | 6  | 143060496 | 143340304 | protein_coding | 7,83 | 0 |
| ENSG00000196352 | CD55     | 1  | 207321508 | 207386804 | protein_coding | 7,82 | 0 |
| ENSG00000163479 | SSR2     | 1  | 156009048 | 156020959 | protein_coding | 7,82 | 0 |
| ENSG00000091527 | CDV3     | 3  | 133573730 | 133590261 | protein_coding | 7,82 | 0 |
| ENSG00000166135 | HIF1AN   | 10 | 100529072 | 100559998 | protein_coding | 7,81 | 0 |
| ENSG00000075785 | RAB7A    | 3  | 128726122 | 128814796 | protein_coding | 7,80 | 0 |
| ENSG00000104998 | IL27RA   | 19 | 14031748  | 14053216  | protein_coding | 7,80 | 0 |
| ENSG00000144406 | UNC80    | 2  | 209771993 | 209999300 | protein_coding | 7,80 | 0 |
| ENSG00000167771 | RCOR2    | 11 | 63911221  | 63916844  | protein_coding | 7,79 | 0 |
| ENSG00000143436 | MRPL9    | 1  | 151759643 | 151763564 | protein_coding | 7,78 | 0 |
| ENSG00000180758 | GPR157   | 1  | 9100305   | 9129170   | protein_coding | 7,78 | 0 |
| ENSG00000196419 | XRCC6    | 22 | 41621119  | 41664048  | protein_coding | 7,78 | 0 |
| ENSG00000008869 | HEATR5B  | 2  | 36968383  | 37084342  | protein_coding | 7,78 | 0 |
| ENSG00000152795 | HNRNPDL  | 4  | 82422564  | 82430408  | protein_coding | 7,77 | 0 |
| ENSG00000117751 | PPP1R8   | 1  | 27830778  | 27851676  | protein_coding | 7,77 | 0 |

|                 |          |    |           |           |                |      |   |
|-----------------|----------|----|-----------|-----------|----------------|------|---|
| ENSG00000167173 | C15orf39 | 15 | 75195643  | 75212169  | protein_coding | 7,77 | 0 |
| ENSG00000077348 | EXOSC5   | 19 | 41386374  | 41397479  | protein_coding | 7,77 | 0 |
| ENSG00000127511 | SIN3B    | 19 | 16829400  | 16880353  | protein_coding | 7,74 | 0 |
| ENSG00000144043 | TEX261   | 2  | 70985938  | 70994945  | protein_coding | 7,74 | 0 |
| ENSG00000148396 | SEC16A   | 9  | 136440096 | 136483759 | protein_coding | 7,74 | 0 |
| ENSG00000122591 | FAM126A  | 7  | 22889371  | 23014130  | protein_coding | 7,74 | 0 |
| ENSG00000138050 | THUMP2   | 2  | 39736060  | 39779267  | protein_coding | 7,73 | 0 |
| ENSG00000151445 | VIPAS39  | 14 | 77426675  | 77457952  | protein_coding | 7,73 | 0 |
| ENSG00000144034 | TPRKB    | 2  | 73729104  | 73737400  | protein_coding | 7,71 | 0 |
| ENSG00000185085 | INTS5    | 11 | 62646848  | 62653302  | protein_coding | 7,71 | 0 |
| ENSG00000160948 | VPS28    | 8  | 144423601 | 144428563 | protein_coding | 7,71 | 0 |
| ENSG00000096996 | IL12RB1  | 19 | 18058995  | 18098944  | protein_coding | 7,70 | 0 |
| ENSG00000015520 | NPC1L1   | 7  | 44512535  | 44541315  | protein_coding | 7,70 | 0 |
| ENSG00000091138 | SLC26A3  | 7  | 107765467 | 107803225 | protein_coding | 7,70 | 0 |
| ENSG00000135622 | SEMA4F   | 2  | 74654228  | 74683853  | protein_coding | 7,70 | 0 |
| ENSG00000084234 | APLP2    | 11 | 130069837 | 130144811 | protein_coding | 7,70 | 0 |
| ENSG00000130508 | PXDN     | 2  | 1631887   | 1744852   | protein_coding | 7,69 | 0 |
| ENSG00000164081 | TEX264   | 3  | 51662693  | 51704323  | protein_coding | 7,69 | 0 |
| ENSG00000136490 | LIMD2    | 17 | 63695902  | 63701172  | protein_coding | 7,68 | 0 |
| ENSG00000198355 | PIM3     | 22 | 49960513  | 49964080  | protein_coding | 7,68 | 0 |
| ENSG00000110841 | PPFIBP1  | 12 | 27523431  | 27695564  | protein_coding | 7,67 | 0 |
| ENSG00000082512 | TRAF5    | 1  | 211326615 | 211374946 | protein_coding | 7,66 | 0 |
| ENSG00000171552 | BCL2L1   | 20 | 31664452  | 31723989  | protein_coding | 7,66 | 0 |
| ENSG00000176102 | CSTF3    | 11 | 33077188  | 33162371  | protein_coding | 7,65 | 0 |
| ENSG00000119661 | DNAL1    | 14 | 73644875  | 73703732  | protein_coding | 7,65 | 0 |
| ENSG00000087299 | L2HGDH   | 14 | 50237563  | 50312548  | protein_coding | 7,65 | 0 |
| ENSG00000102383 | ZDHHC15  | X  | 75368427  | 75523502  | protein_coding | 7,65 | 0 |
| ENSG00000149100 | EIF3M    | 11 | 32583798  | 32606262  | protein_coding | 7,64 | 0 |
| ENSG00000159720 | ATP6V0D1 | 16 | 67438014  | 67481237  | protein_coding | 7,64 | 0 |
| ENSG00000123094 | RASSF8   | 12 | 25959029  | 26079892  | protein_coding | 7,64 | 0 |
| ENSG00000163810 | TGM4     | 3  | 44874608  | 44914990  | protein_coding | 7,63 | 0 |
| ENSG00000186834 | HEXIM1   | 17 | 45148502  | 45152101  | protein_coding | 7,63 | 0 |
| ENSG00000169696 | ASPSCR1  | 17 | 81976807  | 82017406  | protein_coding | 7,63 | 0 |
| ENSG00000176809 | LRRC37A3 | 17 | 64854312  | 64919480  | protein_coding | 7,62 | 0 |
| ENSG00000135926 | TMBIM1   | 2  | 218274192 | 218292586 | protein_coding | 7,61 | 0 |
| ENSG00000057252 | SOAT1    | 1  | 179293714 | 179358680 | protein_coding | 7,61 | 0 |
| ENSG00000071537 | SEL1L    | 14 | 81471549  | 81533861  | protein_coding | 7,60 | 0 |
| ENSG00000180389 | ATP5EP2  | 13 | 27945206  | 27945590  | protein_coding | 7,60 | 0 |
| ENSG00000129317 | PUS7L    | 12 | 43718993  | 43758817  | protein_coding | 7,59 | 0 |
| ENSG00000104529 | EEF1D    | 8  | 143579697 | 143599541 | protein_coding | 7,59 | 0 |
| ENSG00000089818 | NECAP1   | 12 | 8082211   | 8097771   | protein_coding | 7,59 | 0 |
| ENSG00000130244 | FAM98C   | 19 | 38403135  | 38409088  | protein_coding | 7,58 | 0 |
| ENSG00000198873 | GRK5     | 10 | 119207589 | 119459742 | protein_coding | 7,58 | 0 |
| ENSG00000116954 | RRAGC    | 1  | 38838198  | 38859823  | protein_coding | 7,58 | 0 |
| ENSG00000130684 | ZNF337   | 20 | 25674215  | 25696841  | protein_coding | 7,58 | 0 |
| ENSG00000114796 | KLHL24   | 3  | 183635568 | 183684477 | protein_coding | 7,58 | 0 |
| ENSG00000182389 | CACNB4   | 2  | 151832776 | 152099079 | protein_coding | 7,57 | 0 |
| ENSG00000130159 | ECSIT    | 19 | 11505916  | 11529174  | protein_coding | 7,57 | 0 |
| ENSG00000149177 | PTPRJ    | 11 | 47980558  | 48170841  | protein_coding | 7,56 | 0 |
| ENSG00000101966 | XIAP     | X  | 123859724 | 123913979 | protein_coding | 7,56 | 0 |
| ENSG00000162129 | CLPB     | 11 | 72292425  | 72434680  | protein_coding | 7,56 | 0 |
| ENSG00000171466 | ZNF562   | 19 | 9641808   | 9675086   | protein_coding | 7,56 | 0 |
| ENSG00000196363 | WDR5     | 9  | 134135365 | 134159968 | protein_coding | 7,55 | 0 |
| ENSG00000274070 | GATSL2   | 7  | 74964818  | 75024798  | protein_coding | 7,55 | 0 |
| ENSG00000092929 | UNC13D   | 17 | 75827225  | 75844717  | protein_coding | 7,55 | 0 |
| ENSG00000135482 | ZC3H10   | 12 | 56118159  | 56127514  | protein_coding | 7,55 | 0 |
| ENSG00000070366 | SMG6     | 17 | 2059839   | 2303771   | protein_coding | 7,54 | 0 |
| ENSG00000164073 | MFSD8    | 4  | 127917805 | 127965995 | protein_coding | 7,54 | 0 |

|                 |                 |    |           |           |                |      |   |
|-----------------|-----------------|----|-----------|-----------|----------------|------|---|
| ENSG00000163527 | STT3B           | 3  | 31532638  | 31637622  | protein_coding | 7,53 | 0 |
| ENSG00000144827 | ABHD10          | 3  | 111979010 | 111993363 | protein_coding | 7,52 | 0 |
| ENSG00000129636 | ITFG1           | 16 | 47154387  | 47464149  | protein_coding | 7,52 | 0 |
| ENSG00000112210 | RAB23           | 6  | 57186992  | 57222314  | protein_coding | 7,51 | 0 |
| ENSG00000186141 | POLR3C          | 1  | 145824088 | 145842505 | protein_coding | 7,51 | 0 |
| ENSG00000144635 | DYNCL1L1        | 3  | 32525971  | 32570874  | protein_coding | 7,50 | 0 |
| ENSG00000188549 | C15orf52        | 15 | 40331452  | 40340967  | protein_coding | 7,50 | 0 |
| ENSG00000137747 | TMPRSS13        | 11 | 117900643 | 117929459 | protein_coding | 7,50 | 0 |
| ENSG00000145777 | TSLP            | 5  | 111070062 | 111078024 | protein_coding | 7,50 | 0 |
| ENSG00000144227 | NXPH2           | 2  | 138670772 | 138780348 | protein_coding | 7,50 | 0 |
| ENSG00000164916 | FOXK1           | 7  | 4682309   | 4771443   | protein_coding | 7,49 | 0 |
| ENSG00000106080 | FKBP14          | 7  | 30010587  | 30026684  | protein_coding | 7,49 | 0 |
| ENSG00000167333 | TRIM68          | 11 | 4598672   | 4608259   | protein_coding | 7,48 | 0 |
| ENSG00000109576 | AADAT           | 4  | 170060222 | 170091699 | protein_coding | 7,47 | 0 |
| ENSG00000144026 | ZNF514          | 2  | 95147330  | 95165413  | protein_coding | 7,47 | 0 |
| ENSG00000168175 | MAPK1IP1L       | 14 | 55051631  | 55070192  | protein_coding | 7,47 | 0 |
| ENSG00000197646 | PDCD1LG2        | 9  | 5510570   | 5571254   | protein_coding | 7,46 | 0 |
| ENSG00000158458 | NRG2            | 5  | 139846779 | 140043299 | protein_coding | 7,45 | 0 |
| ENSG00000164292 | RHOBTB3         | 5  | 95713522  | 95824383  | protein_coding | 7,45 | 0 |
| ENSG00000169057 | MECP2           | X  | 154021573 | 154137103 | protein_coding | 7,45 | 0 |
| ENSG00000188725 | SMIM15          | 5  | 61157709  | 61162474  | protein_coding | 7,44 | 0 |
| ENSG00000147996 | CBWD5           | 9  | 65668805  | 65734041  | protein_coding | 7,43 | 0 |
| ENSG00000198700 | IPO9            | 1  | 201829141 | 201884294 | protein_coding | 7,42 | 0 |
| ENSG00000113716 | HMGXB3          | 5  | 150000046 | 150053142 | protein_coding | 7,42 | 0 |
| ENSG00000162517 | PEF1            | 1  | 31629862  | 31644896  | protein_coding | 7,41 | 0 |
| ENSG00000124160 | NCOA5           | 20 | 46060985  | 46089952  | protein_coding | 7,40 | 0 |
| ENSG00000198793 | MTOR            | 1  | 11106535  | 11262507  | protein_coding | 7,40 | 0 |
| ENSG00000117528 | ABCD3           | 1  | 94418455  | 94518666  | protein_coding | 7,40 | 0 |
| ENSG00000178226 | PRSS36          | 16 | 31138925  | 31150094  | protein_coding | 7,40 | 0 |
| ENSG00000260729 | ENSG00000260729 | 15 | 72284727  | 72375981  | protein_coding | 7,40 | 0 |
| ENSG00000004838 | ZMYND10         | 3  | 50341110  | 50346852  | protein_coding | 7,40 | 0 |
| ENSG00000213085 | CFAP45          | 1  | 159872364 | 159900163 | protein_coding | 7,40 | 0 |
| ENSG00000122121 | XPNPEP2         | X  | 129738974 | 129769538 | protein_coding | 7,40 | 0 |
| ENSG00000111962 | UST             | 6  | 148747328 | 149076990 | protein_coding | 7,39 | 0 |
| ENSG00000196453 | ZNF777          | 7  | 149431363 | 149461123 | protein_coding | 7,38 | 0 |
| ENSG00000077235 | GTF3C1          | 16 | 27459555  | 27549913  | protein_coding | 7,38 | 0 |
| ENSG00000160714 | UBE2Q1          | 1  | 154548577 | 154559028 | protein_coding | 7,38 | 0 |
| ENSG00000119682 | AREL1           | 14 | 74653437  | 74713115  | protein_coding | 7,37 | 0 |
| ENSG00000163291 | PAQR3           | 4  | 78887127  | 78939438  | protein_coding | 7,37 | 0 |
| ENSG00000136636 | KCTD3           | 1  | 215567392 | 215621807 | protein_coding | 7,36 | 0 |
| ENSG00000169180 | XPO6            | 16 | 28097979  | 28211920  | protein_coding | 7,36 | 0 |
| ENSG00000076067 | RBMS2           | 12 | 56521929  | 56596196  | protein_coding | 7,35 | 0 |
| ENSG00000180440 | SERTM1          | 13 | 36673912  | 36697839  | protein_coding | 7,34 | 0 |
| ENSG00000187676 | B3GLCT          | 13 | 31199936  | 31332276  | protein_coding | 7,33 | 0 |
| ENSG00000161940 | BCL6B           | 17 | 7023020   | 7030290   | protein_coding | 7,33 | 0 |
| ENSG00000179241 | LDLRAD3         | 11 | 35943981  | 36232136  | protein_coding | 7,33 | 0 |
| ENSG00000167635 | ZNF146          | 19 | 36214602  | 36238774  | protein_coding | 7,33 | 0 |
| ENSG00000204209 | DAXX            | 6  | 33318558  | 33329269  | protein_coding | 7,32 | 0 |
| ENSG00000242247 | ARFGAP3         | 22 | 42796502  | 42858106  | protein_coding | 7,32 | 0 |
| ENSG00000116977 | LGALS8          | 1  | 236518000 | 236552981 | protein_coding | 7,32 | 0 |
| ENSG00000058799 | YIPF1           | 1  | 53851719  | 53889834  | protein_coding | 7,32 | 0 |
| ENSG00000138443 | ABI2            | 2  | 203328219 | 203447723 | protein_coding | 7,31 | 0 |
| ENSG00000254598 | CSNK2A3         | 11 | 11351942  | 11353357  | protein_coding | 7,31 | 0 |
| ENSG00000124380 | SNRNP27         | 2  | 69893560  | 69905575  | protein_coding | 7,31 | 0 |
| ENSG00000179941 | BBS10           | 12 | 76344474  | 76348442  | protein_coding | 7,31 | 0 |
| ENSG00000099284 | H2AFY2          | 10 | 70052796  | 70112280  | protein_coding | 7,31 | 0 |
| ENSG00000163683 | SMIM14          | 4  | 39546330  | 39639090  | protein_coding | 7,30 | 0 |
| ENSG00000075240 | GRAMD4          | 22 | 46576012  | 46679790  | protein_coding | 7,30 | 0 |

|                 |                 |    |           |           |                |      |   |
|-----------------|-----------------|----|-----------|-----------|----------------|------|---|
| ENSG00000270149 | ENSG00000270149 | 1  | 160997957 | 161038962 | protein_coding | 7,30 | 0 |
| ENSG00000185825 | BCAP31          | X  | 153700497 | 153724697 | protein_coding | 7,30 | 0 |
| ENSG00000128191 | DGCR8           | 22 | 20080232  | 20111877  | protein_coding | 7,30 | 0 |
| ENSG00000054118 | THRAP3          | 1  | 36224416  | 36305357  | protein_coding | 7,29 | 0 |
| ENSG00000004700 | RECQL           | 12 | 21468911  | 21501669  | protein_coding | 7,28 | 0 |
| ENSG00000104375 | STK3            | 8  | 98401403  | 98942827  | protein_coding | 7,28 | 0 |
| ENSG00000141013 | GAS8            | 16 | 90019629  | 90044975  | protein_coding | 7,28 | 0 |
| ENSG00000197056 | ZMYM1           | 1  | 35059786  | 35115859  | protein_coding | 7,28 | 0 |
| ENSG00000167920 | TMEM99          | 17 | 40819106  | 40836274  | protein_coding | 7,27 | 0 |
| ENSG00000132002 | DNAJB1          | 19 | 14514770  | 14529770  | protein_coding | 7,27 | 0 |
| ENSG00000106125 | FAM188B         | 7  | 30771417  | 30892387  | protein_coding | 7,27 | 0 |
| ENSG00000138646 | HERC5           | 4  | 88457117  | 88506163  | protein_coding | 7,27 | 0 |
| ENSG00000148358 | GPR107          | 9  | 130053426 | 130140169 | protein_coding | 7,27 | 0 |
| ENSG00000119041 | GTF3C3          | 2  | 196763032 | 196799725 | protein_coding | 7,26 | 0 |
| ENSG00000129116 | PALLD           | 4  | 168497066 | 168928457 | protein_coding | 7,26 | 0 |
| ENSG00000145246 | ATP10D          | 4  | 47485288  | 47593486  | protein_coding | 7,24 | 0 |
| ENSG00000116786 | PLEKHM2         | 1  | 15684332  | 15734769  | protein_coding | 7,24 | 0 |
| ENSG00000113068 | PFDN1           | 5  | 140245039 | 140303121 | protein_coding | 7,24 | 0 |
| ENSG00000125434 | SLC25A35        | 17 | 8287763   | 8295343   | protein_coding | 7,24 | 0 |
| ENSG00000185619 | PCGF3           | 4  | 705748    | 770640    | protein_coding | 7,24 | 0 |
| ENSG00000088833 | NSFL1C          | 20 | 1442162   | 1473842   | protein_coding | 7,23 | 0 |
| ENSG00000147862 | NFIB            | 9  | 14081843  | 14398983  | protein_coding | 7,23 | 0 |
| ENSG00000174915 | PTDSS2          | 11 | 448268    | 491399    | protein_coding | 7,23 | 0 |
| ENSG00000251322 | SHANK3          | 22 | 50674415  | 50733298  | protein_coding | 7,22 | 0 |
| ENSG00000105982 | RNF32           | 7  | 156640281 | 156677130 | protein_coding | 7,21 | 0 |
| ENSG00000108506 | INTS2           | 17 | 61865367  | 61928016  | protein_coding | 7,20 | 0 |
| ENSG00000183160 | TMEM119         | 12 | 108589846 | 108598320 | protein_coding | 7,20 | 0 |
| ENSG00000184923 | NUTM2A          | 10 | 87225448  | 87236908  | protein_coding | 7,20 | 0 |
| ENSG00000227507 | LTB             | 6  | 31580525  | 31582522  | protein_coding | 7,20 | 0 |
| ENSG00000170837 | GPR27           | 3  | 71754050  | 71756496  | protein_coding | 7,20 | 0 |
| ENSG00000133639 | BTG1            | 12 | 92140278  | 92145897  | protein_coding | 7,19 | 0 |
| ENSG00000072071 | ADGRL1          | 19 | 14147743  | 14206187  | protein_coding | 7,19 | 0 |
| ENSG00000178297 | TMPRSS9         | 19 | 2389771   | 2426239   | protein_coding | 7,18 | 0 |
| ENSG00000066697 | MSANTD3         | 9  | 100427156 | 100451711 | protein_coding | 7,17 | 0 |
| ENSG00000065809 | FAM107B         | 10 | 14518557  | 14774897  | protein_coding | 7,17 | 0 |
| ENSG00000170537 | TMC7            | 16 | 18983934  | 19063942  | protein_coding | 7,17 | 0 |
| ENSG00000158470 | B4GALT5         | 20 | 49632945  | 49713878  | protein_coding | 7,17 | 0 |
| ENSG00000160194 | NDUFV3          | 21 | 42879644  | 42913304  | protein_coding | 7,17 | 0 |
| ENSG00000077721 | UBE2A           | X  | 119574467 | 119591083 | protein_coding | 7,17 | 0 |
| ENSG00000163818 | LZTFL1          | 3  | 45823316  | 45916042  | protein_coding | 7,16 | 0 |
| ENSG00000128731 | HERC2           | 15 | 28111040  | 28322152  | protein_coding | 7,15 | 0 |
| ENSG00000127804 | METTL16         | 17 | 2405562   | 2511891   | protein_coding | 7,15 | 0 |
| ENSG00000171016 | PYGO1           | 15 | 55538890  | 55588947  | protein_coding | 7,15 | 0 |
| ENSG00000166816 | LDHD            | 16 | 75111860  | 75116771  | protein_coding | 7,15 | 0 |
| ENSG00000133422 | MORC2           | 22 | 30925130  | 30968298  | protein_coding | 7,14 | 0 |
| ENSG00000148429 | USP6NL          | 10 | 11453946  | 11611754  | protein_coding | 7,14 | 0 |
| ENSG00000204580 | DDR1            | 6  | 30876421  | 30900156  | protein_coding | 7,14 | 0 |
| ENSG00000144306 | SCRN3           | 2  | 174395730 | 174429575 | protein_coding | 7,14 | 0 |
| ENSG00000180917 | CMTR2           | 16 | 71281389  | 71289715  | protein_coding | 7,14 | 0 |
| ENSG00000184677 | ZBTB40          | 1  | 22451851  | 22531157  | protein_coding | 7,13 | 0 |
| ENSG00000153904 | DDAH1           | 1  | 85318481  | 85578363  | protein_coding | 7,12 | 0 |
| ENSG00000163904 | SENP2           | 3  | 185582496 | 185633551 | protein_coding | 7,12 | 0 |
| ENSG00000040487 | PQLC2           | 1  | 19312326  | 19329300  | protein_coding | 7,12 | 0 |
| ENSG00000104093 | DMXL2           | 15 | 51447711  | 51622833  | protein_coding | 7,12 | 0 |
| ENSG00000152782 | PANK1           | 10 | 89579497  | 89645572  | protein_coding | 7,11 | 0 |
| ENSG00000118849 | RARRES1         | 3  | 158696892 | 158732696 | protein_coding | 7,10 | 0 |
| ENSG00000204130 | RUFY2           | 10 | 68341107  | 68407294  | protein_coding | 7,10 | 0 |
| ENSG00000253598 | SLC10A5         | 8  | 81693607  | 81696174  | protein_coding | 7,10 | 0 |

|                 |          |    |           |           |                |      |   |
|-----------------|----------|----|-----------|-----------|----------------|------|---|
| ENSG00000113205 | PCDHB3   | 5  | 141100473 | 141103827 | protein_coding | 7,10 | 0 |
| ENSG00000153563 | CD8A     | 2  | 86784610  | 86808396  | protein_coding | 7,10 | 0 |
| ENSG00000262180 | OCLM     | 1  | 186400572 | 186401455 | protein_coding | 7,10 | 0 |
| ENSG00000143870 | PDIA6    | 2  | 10783391  | 10837977  | protein_coding | 7,10 | 0 |
| ENSG00000145354 | CISD2    | 4  | 102868978 | 102889242 | protein_coding | 7,10 | 0 |
| ENSG00000100325 | ASCC2    | 22 | 29788608  | 29838304  | protein_coding | 7,09 | 0 |
| ENSG00000060688 | SNRNP40  | 1  | 31259568  | 31296782  | protein_coding | 7,09 | 0 |
| ENSG00000161048 | NAPEPLD  | 7  | 103099776 | 103149560 | protein_coding | 7,09 | 0 |
| ENSG00000155542 | SETD9    | 5  | 56909260  | 56925532  | protein_coding | 7,08 | 0 |
| ENSG00000122390 | NAA60    | 16 | 3443611   | 3486963   | protein_coding | 7,08 | 0 |
| ENSG00000198792 | TMEM184B | 22 | 38219291  | 38273034  | protein_coding | 7,07 | 0 |
| ENSG00000122378 | FAM213A  | 10 | 80407829  | 80437115  | protein_coding | 7,06 | 0 |
| ENSG00000070047 | PHRF1    | 11 | 576486    | 612222    | protein_coding | 7,06 | 0 |
| ENSG00000034533 | ASTE1    | 3  | 131013875 | 131027649 | protein_coding | 7,06 | 0 |
| ENSG00000230124 | ACBD6    | 1  | 180269653 | 180502954 | protein_coding | 7,06 | 0 |
| ENSG00000134644 | PUM1     | 1  | 30931506  | 31065991  | protein_coding | 7,06 | 0 |
| ENSG00000197978 | GOLGA6L9 | 15 | 82430018  | 82439153  | protein_coding | 7,06 | 0 |
| ENSG00000172007 | RAB33B   | 4  | 139453232 | 139476609 | protein_coding | 7,06 | 0 |
| ENSG00000054967 | RELT     | 11 | 73376264  | 73397474  | protein_coding | 7,05 | 0 |
| ENSG00000105699 | LSR      | 19 | 35248330  | 35267964  | protein_coding | 7,05 | 0 |
| ENSG00000129351 | ILF3     | 19 | 10654261  | 10692417  | protein_coding | 7,05 | 0 |
| ENSG00000105887 | MTPN     | 7  | 135926761 | 135977353 | protein_coding | 7,04 | 0 |
| ENSG00000274349 | ZNF658   | 9  | 66856426  | 66932141  | protein_coding | 7,04 | 0 |
| ENSG00000111737 | RAB35    | 12 | 120095095 | 120117502 | protein_coding | 7,03 | 0 |
| ENSG00000163214 | DHX57    | 2  | 38797729  | 38875934  | protein_coding | 7,03 | 0 |
| ENSG00000174485 | DENND4A  | 15 | 65658046  | 65792293  | protein_coding | 7,03 | 0 |
| ENSG00000130254 | SAFB2    | 19 | 5586999   | 5624046   | protein_coding | 7,03 | 0 |
| ENSG00000109618 | SEPSECS  | 4  | 25120014  | 25160442  | protein_coding | 7,02 | 0 |
| ENSG00000148248 | SURF4    | 9  | 133361449 | 133376166 | protein_coding | 7,01 | 0 |
| ENSG00000103248 | MTHFSD   | 16 | 86530176  | 86555235  | protein_coding | 7,00 | 0 |
| ENSG00000128886 | ELL3     | 15 | 43772600  | 43777543  | protein_coding | 7,00 | 0 |
| ENSG00000139714 | MORN3    | 12 | 121648742 | 121672631 | protein_coding | 7,00 | 0 |
| ENSG00000146233 | CYP39A1  | 6  | 46549580  | 46652830  | protein_coding | 7,00 | 0 |
| ENSG00000224389 | C4B      | 6  | 32014762  | 32035418  | protein_coding | 7,00 | 0 |
| ENSG00000058600 | POLR3E   | 16 | 22297375  | 22335103  | protein_coding | 7,00 | 0 |
| ENSG00000140950 | TLDC1    | 16 | 84476421  | 84554033  | protein_coding | 7,00 | 0 |
| ENSG00000140750 | ARHGAP17 | 16 | 24919385  | 25015666  | protein_coding | 7,00 | 0 |
| ENSG00000015475 | BID      | 22 | 17734138  | 17774770  | protein_coding | 6,99 | 0 |
| ENSG00000137547 | MRPL15   | 8  | 54135210  | 54147901  | protein_coding | 6,98 | 0 |
| ENSG00000149212 | SESN3    | 11 | 95165513  | 95232541  | protein_coding | 6,98 | 0 |
| ENSG00000131653 | TRAF7    | 16 | 2155698   | 2178129   | protein_coding | 6,98 | 0 |
| ENSG00000131475 | VPS25    | 17 | 42773436  | 42779599  | protein_coding | 6,97 | 0 |
| ENSG00000135124 | P2RX4    | 12 | 121209857 | 121234106 | protein_coding | 6,96 | 0 |
| ENSG00000126945 | HNRNPH2  | X  | 101408295 | 101414133 | protein_coding | 6,96 | 0 |
| ENSG00000001629 | ANKIB1   | 7  | 92246234  | 92401384  | protein_coding | 6,96 | 0 |
| ENSG00000169955 | ZNF747   | 16 | 30530367  | 30535347  | protein_coding | 6,96 | 0 |
| ENSG00000110497 | AMBRA1   | 11 | 46396414  | 46594125  | protein_coding | 6,96 | 0 |
| ENSG00000134897 | BIVM     | 13 | 102799049 | 102841535 | protein_coding | 6,96 | 0 |
| ENSG00000135457 | TFCP2    | 12 | 51093663  | 51173134  | protein_coding | 6,95 | 0 |
| ENSG00000134255 | CEPT1    | 1  | 111139627 | 111185102 | protein_coding | 6,95 | 0 |
| ENSG00000112309 | B3GAT2   | 6  | 70856679  | 70957038  | protein_coding | 6,95 | 0 |
| ENSG00000080298 | RFX3     | 9  | 3218297   | 3526004   | protein_coding | 6,95 | 0 |
| ENSG00000162613 | FUBP1    | 1  | 77944055  | 77979110  | protein_coding | 6,94 | 0 |
| ENSG00000119703 | ZC2HC1C  | 14 | 75064170  | 75079987  | protein_coding | 6,94 | 0 |
| ENSG00000135365 | PHF21A   | 11 | 45929323  | 46121178  | protein_coding | 6,94 | 0 |
| ENSG00000132541 | HRSP12   | 8  | 98102344  | 98117241  | protein_coding | 6,92 | 0 |
| ENSG00000186230 | ZNF749   | 19 | 57435329  | 57445485  | protein_coding | 6,92 | 0 |
| ENSG00000163719 | MTMR14   | 3  | 9649433   | 9702394   | protein_coding | 6,91 | 0 |

|                 |            |    |           |           |                |      |   |
|-----------------|------------|----|-----------|-----------|----------------|------|---|
| ENSG00000128989 | ARPP19     | 15 | 52547045  | 52569883  | protein_coding | 6,91 | 0 |
| ENSG00000114859 | CLCN2      | 3  | 184346185 | 184361651 | protein_coding | 6,91 | 0 |
| ENSG00000151240 | DIP2C      | 10 | 274190    | 689668    | protein_coding | 6,91 | 0 |
| ENSG00000176261 | ZBTB8OS    | 1  | 32600172  | 32650903  | protein_coding | 6,91 | 0 |
| ENSG00000109083 | IFT20      | 17 | 28328325  | 28335489  | protein_coding | 6,90 | 0 |
| ENSG00000117069 | ST6GALNAC  | 1  | 76867441  | 77065711  | protein_coding | 6,90 | 0 |
| ENSG00000118971 | CCND2      | 12 | 4273772   | 4305350   | protein_coding | 6,90 | 0 |
| ENSG00000182040 | USH1G      | 17 | 74916084  | 74923256  | protein_coding | 6,90 | 0 |
| ENSG00000243789 | JMJD7      | 15 | 41828085  | 41837581  | protein_coding | 6,90 | 0 |
| ENSG00000120500 | ARR3       | X  | 70268305  | 70281840  | protein_coding | 6,90 | 0 |
| ENSG00000188269 | OR7A5      | 19 | 14792490  | 14835376  | protein_coding | 6,89 | 0 |
| ENSG00000235376 | RPEL1      | 10 | 103245887 | 103248016 | protein_coding | 6,89 | 0 |
| ENSG00000132004 | FBXW9      | 19 | 12688053  | 12696643  | protein_coding | 6,89 | 0 |
| ENSG00000196449 | YRDC       | 1  | 37802944  | 37808185  | protein_coding | 6,88 | 0 |
| ENSG00000092445 | TYRO3      | 15 | 41557675  | 41583586  | protein_coding | 6,88 | 0 |
| ENSG00000166822 | TMEM170A   | 16 | 75443054  | 75465497  | protein_coding | 6,88 | 0 |
| ENSG00000198746 | GPATCH3    | 1  | 26890488  | 26900466  | protein_coding | 6,87 | 0 |
| ENSG00000197024 | ZNF398     | 7  | 149126416 | 149182802 | protein_coding | 6,86 | 0 |
| ENSG00000134152 | KATNBL1    | 15 | 34140674  | 34210096  | protein_coding | 6,86 | 0 |
| ENSG00000099219 | ERMP1      | 9  | 5765076   | 5833117   | protein_coding | 6,86 | 0 |
| ENSG00000198521 | ZNF43      | 19 | 21804949  | 21852125  | protein_coding | 6,86 | 0 |
| ENSG00000163257 | DCAF16     | 4  | 17800655  | 17810758  | protein_coding | 6,86 | 0 |
| ENSG00000106683 | LIMK1      | 7  | 74082933  | 74122525  | protein_coding | 6,86 | 0 |
| ENSG00000100129 | EIF3L      | 22 | 37848868  | 37889407  | protein_coding | 6,85 | 0 |
| ENSG00000184432 | COPB2      | 3  | 139355600 | 139389732 | protein_coding | 6,85 | 0 |
| ENSG00000179029 | TMEM107    | 17 | 8173237   | 8176399   | protein_coding | 6,84 | 0 |
| ENSG00000158711 | ELK4       | 1  | 205597556 | 205631962 | protein_coding | 6,84 | 0 |
| ENSG00000167842 | MIS12      | 17 | 5486285   | 5490814   | protein_coding | 6,84 | 0 |
| ENSG00000165650 | PDZD8      | 10 | 117277274 | 117375467 | protein_coding | 6,84 | 0 |
| ENSG00000171456 | ASXL1      | 20 | 32358344  | 32439319  | protein_coding | 6,83 | 0 |
| ENSG00000122188 | LAX1       | 1  | 203765176 | 203776233 | protein_coding | 6,83 | 0 |
| ENSG00000186130 | ZBTB6      | 9  | 122908056 | 122913330 | protein_coding | 6,83 | 0 |
| ENSG00000172840 | PDP2       | 16 | 66878589  | 66895754  | protein_coding | 6,83 | 0 |
| ENSG00000049323 | LTBP1      | 2  | 32946972  | 33399509  | protein_coding | 6,83 | 0 |
| ENSG00000152749 | GPR180     | 13 | 94601903  | 94634645  | protein_coding | 6,82 | 0 |
| ENSG00000091656 | ZFHX4      | 8  | 76681219  | 76867285  | protein_coding | 6,82 | 0 |
| ENSG00000281527 | ENSG000002 | 8  | 116849884 | 116851073 | protein_coding | 6,82 | 0 |
| ENSG00000108773 | KAT2A      | 17 | 42113108  | 42121358  | protein_coding | 6,81 | 0 |
| ENSG00000107140 | TESK1      | 9  | 35605305  | 35610041  | protein_coding | 6,81 | 0 |
| ENSG00000122912 | SLC25A16   | 10 | 68477999  | 68527474  | protein_coding | 6,81 | 0 |
| ENSG00000125686 | MED1       | 17 | 39404285  | 39451286  | protein_coding | 6,81 | 0 |
| ENSG00000181264 | TMEM136    | 11 | 120325129 | 120333682 | protein_coding | 6,81 | 0 |
| ENSG00000070540 | WIP1       | 17 | 68420948  | 68457513  | protein_coding | 6,80 | 0 |
| ENSG00000078747 | ITCH       | 20 | 34363235  | 34511393  | protein_coding | 6,80 | 0 |
| ENSG00000125895 | TMEM74B    | 20 | 1180561   | 1185415   | protein_coding | 6,80 | 0 |
| ENSG00000166428 | PLD4       | 14 | 104924816 | 104937790 | protein_coding | 6,80 | 0 |
| ENSG00000276966 | HIST1H4E   | 6  | 26204552  | 26206038  | protein_coding | 6,80 | 0 |
| ENSG00000253159 | PCDHGA12   | 5  | 141430589 | 141512979 | protein_coding | 6,80 | 0 |
| ENSG00000254245 | PCDHGA3    | 5  | 141343829 | 141512979 | protein_coding | 6,80 | 0 |
| ENSG00000144063 | MALL       | 2  | 110083870 | 110116566 | protein_coding | 6,80 | 0 |
| ENSG00000136634 | IL10       | 1  | 206767602 | 206772494 | protein_coding | 6,80 | 0 |
| ENSG00000163154 | TNFAIP8L2  | 1  | 151156629 | 151159749 | protein_coding | 6,80 | 0 |
| ENSG00000281571 | ENSG000002 | 1  | 145214851 | 145215938 | protein_coding | 6,80 | 0 |
| ENSG00000154945 | ANKRD40    | 17 | 50693190  | 50707924  | protein_coding | 6,80 | 0 |
| ENSG00000078269 | SYNJ2      | 6  | 157981887 | 158099176 | protein_coding | 6,80 | 0 |
| ENSG00000101745 | ANKRD12    | 18 | 9136228   | 9285985   | protein_coding | 6,80 | 0 |
| ENSG00000187792 | ZNF70      | 22 | 23738678  | 23751092  | protein_coding | 6,80 | 0 |
| ENSG00000133678 | TMEM254    | 10 | 80078646  | 80092557  | protein_coding | 6,79 | 0 |

|                 |            |    |           |           |                |      |   |
|-----------------|------------|----|-----------|-----------|----------------|------|---|
| ENSG0000055917  | PUM2       | 2  | 20248691  | 20352234  | protein_coding | 6,79 | 0 |
| ENSG0000085832  | EPS15      | 1  | 51354263  | 51519328  | protein_coding | 6,79 | 0 |
| ENSG00000124593 | PRICKLE4   | 6  | 41780349  | 41790141  | protein_coding | 6,79 | 0 |
| ENSG00000100883 | SRP54      | 14 | 34981957  | 35029567  | protein_coding | 6,79 | 0 |
| ENSG00000175711 | B3GNTL1    | 17 | 82942155  | 83051810  | protein_coding | 6,79 | 0 |
| ENSG00000197694 | SPTAN1     | 9  | 128552558 | 128633662 | protein_coding | 6,77 | 0 |
| ENSG00000130338 | TULP4      | 6  | 158232236 | 158511828 | protein_coding | 6,77 | 0 |
| ENSG00000243477 | NAT6       | 3  | 50296402  | 50299421  | protein_coding | 6,77 | 0 |
| ENSG0000087008  | ACOX3      | 4  | 8366282   | 8440723   | protein_coding | 6,77 | 0 |
| ENSG00000128973 | CLN6       | 15 | 68206992  | 68257211  | protein_coding | 6,76 | 0 |
| ENSG00000127948 | POR        | 7  | 75899200  | 75986855  | protein_coding | 6,76 | 0 |
| ENSG00000116698 | SMG7       | 1  | 183472216 | 183598246 | protein_coding | 6,76 | 0 |
| ENSG00000131263 | RLIM       | X  | 74585217  | 74614617  | protein_coding | 6,75 | 0 |
| ENSG00000108587 | GOSR1      | 17 | 30477362  | 30527592  | protein_coding | 6,75 | 0 |
| ENSG00000116922 | C1orf109   | 1  | 37681570  | 37692249  | protein_coding | 6,75 | 0 |
| ENSG00000179119 | SPTY2D1    | 11 | 18606401  | 18634791  | protein_coding | 6,75 | 0 |
| ENSG00000188493 | C19orf54   | 19 | 40740856  | 40751553  | protein_coding | 6,74 | 0 |
| ENSG00000160131 | VMA21      | X  | 151396515 | 151409364 | protein_coding | 6,74 | 0 |
| ENSG00000214944 | ARHGEF28   | 5  | 73626158  | 73941993  | protein_coding | 6,74 | 0 |
| ENSG00000159842 | ABR        | 17 | 1003518   | 1229021   | protein_coding | 6,74 | 0 |
| ENSG00000241127 | YAE1D1     | 7  | 39566376  | 39610320  | protein_coding | 6,74 | 0 |
| ENSG00000099953 | MMP11      | 22 | 23768226  | 23784316  | protein_coding | 6,73 | 0 |
| ENSG00000179299 | NSUN7      | 4  | 40749897  | 40809985  | protein_coding | 6,73 | 0 |
| ENSG00000073536 | NLE1       | 17 | 35128753  | 35142315  | protein_coding | 6,73 | 0 |
| ENSG00000196850 | PPTC7      | 12 | 110533245 | 110583320 | protein_coding | 6,73 | 0 |
| ENSG00000188710 | QRFP       | 9  | 130892702 | 130896812 | protein_coding | 6,73 | 0 |
| ENSG00000134508 | CABLES1    | 18 | 23134564  | 23260467  | protein_coding | 6,73 | 0 |
| ENSG00000159140 | SON        | 21 | 33542618  | 33577481  | protein_coding | 6,72 | 0 |
| ENSG00000092199 | HNRNPC     | 14 | 21209136  | 21269494  | protein_coding | 6,72 | 0 |
| ENSG00000115241 | PPM1G      | 2  | 27381194  | 27409687  | protein_coding | 6,72 | 0 |
| ENSG00000154889 | MPPE1      | 18 | 11882622  | 11909223  | protein_coding | 6,71 | 0 |
| ENSG00000133030 | MPRIP      | 17 | 17042545  | 17217679  | protein_coding | 6,71 | 0 |
| ENSG00000112249 | ASCC3      | 6  | 100508194 | 100881372 | protein_coding | 6,70 | 0 |
| ENSG00000105398 | SULT2A1    | 19 | 47870466  | 47886397  | protein_coding | 6,70 | 0 |
| ENSG00000244731 | C4A        | 6  | 31982024  | 32002681  | protein_coding | 6,70 | 0 |
| ENSG00000117133 | RPF1       | 1  | 84479259  | 84497790  | protein_coding | 6,70 | 0 |
| ENSG00000182983 | ZNF662     | 3  | 42905731  | 42917641  | protein_coding | 6,69 | 0 |
| ENSG00000157827 | FMNL2      | 2  | 152335237 | 152649834 | protein_coding | 6,68 | 0 |
| ENSG00000145348 | TBCK       | 4  | 106041599 | 106321495 | protein_coding | 6,68 | 0 |
| ENSG00000166128 | RAB8B      | 15 | 63189469  | 63267782  | protein_coding | 6,68 | 0 |
| ENSG00000140403 | DNAJA4     | 15 | 78264086  | 78282196  | protein_coding | 6,68 | 0 |
| ENSG00000167220 | HDHD2      | 18 | 47107403  | 47150520  | protein_coding | 6,68 | 0 |
| ENSG00000158042 | MRPL17     | 11 | 6680782   | 6683401   | protein_coding | 6,68 | 0 |
| ENSG00000125772 | GPCPD1     | 20 | 5544404   | 5611026   | protein_coding | 6,68 | 0 |
| ENSG00000198718 | FAM179B    | 14 | 44962208  | 45074431  | protein_coding | 6,67 | 0 |
| ENSG00000280550 | ENSG000002 | 11 | 33073925  | 33074214  | protein_coding | 6,67 | 0 |
| ENSG00000189159 | HN1        | 17 | 75135248  | 75168281  | protein_coding | 6,66 | 0 |
| ENSG00000107863 | ARHGAP21   | 10 | 24583609  | 24723668  | protein_coding | 6,66 | 0 |
| ENSG00000163872 | YEATS2     | 3  | 183697818 | 183812625 | protein_coding | 6,66 | 0 |
| ENSG00000185689 | C6orf201   | 6  | 4079209   | 4130951   | protein_coding | 6,66 | 0 |
| ENSG00000125124 | BBS2       | 16 | 56466836  | 56520283  | protein_coding | 6,65 | 0 |
| ENSG0000011258  | MBTD1      | 17 | 51177425  | 51260163  | protein_coding | 6,65 | 0 |
| ENSG00000108946 | PRKAR1A    | 17 | 68511780  | 68551319  | protein_coding | 6,65 | 0 |
| ENSG00000100949 | RABGGTA    | 14 | 24265538  | 24271739  | protein_coding | 6,64 | 0 |
| ENSG00000156599 | ZDHC5      | 11 | 57667747  | 57701187  | protein_coding | 6,64 | 0 |
| ENSG00000143924 | EML4       | 2  | 42169350  | 42332548  | protein_coding | 6,64 | 0 |
| ENSG00000165972 | CCDC38     | 12 | 95867048  | 95942974  | protein_coding | 6,64 | 0 |
| ENSG00000074201 | CLNS1A     | 11 | 77514936  | 77637805  | protein_coding | 6,64 | 0 |

|                 |            |    |           |           |                |      |   |
|-----------------|------------|----|-----------|-----------|----------------|------|---|
| ENSG00000170271 | FAXDC2     | 5  | 154818491 | 154859252 | protein_coding | 6,63 | 0 |
| ENSG00000135974 | C2orf49    | 2  | 105337359 | 105349211 | protein_coding | 6,62 | 0 |
| ENSG00000155363 | MOV10      | 1  | 112673141 | 112700746 | protein_coding | 6,62 | 0 |
| ENSG00000110911 | SLC11A2    | 12 | 50979401  | 51028566  | protein_coding | 6,62 | 0 |
| ENSG00000152223 | EPG5       | 18 | 45847609  | 45967274  | protein_coding | 6,61 | 0 |
| ENSG00000167986 | DDB1       | 11 | 61299451  | 61342596  | protein_coding | 6,61 | 0 |
| ENSG00000148225 | WDR31      | 9  | 113313222 | 113340298 | protein_coding | 6,61 | 0 |
| ENSG00000100079 | LGALS2     | 22 | 37570246  | 37582616  | protein_coding | 6,60 | 0 |
| ENSG00000136999 | NOV        | 8  | 119416306 | 119424353 | protein_coding | 6,60 | 0 |
| ENSG00000124098 | FAM210B    | 20 | 56358915  | 56368663  | protein_coding | 6,60 | 0 |
| ENSG00000117151 | CTBS       | 1  | 84549606  | 84574480  | protein_coding | 6,58 | 0 |
| ENSG00000110011 | DNAJC4     | 11 | 64230278  | 64234286  | protein_coding | 6,58 | 0 |
| ENSG00000121864 | ZNF639     | 3  | 179322991 | 179338583 | protein_coding | 6,58 | 0 |
| ENSG00000205531 | NAP1L4     | 11 | 2944431   | 2992377   | protein_coding | 6,58 | 0 |
| ENSG00000197905 | TEAD4      | 12 | 2959330   | 3040673   | protein_coding | 6,58 | 0 |
| ENSG00000132382 | MYBBP1A    | 17 | 4538897   | 4555631   | protein_coding | 6,57 | 0 |
| ENSG00000129347 | KRI1       | 19 | 10553078  | 10566037  | protein_coding | 6,57 | 0 |
| ENSG00000120519 | SLC10A7    | 4  | 146253975 | 146521964 | protein_coding | 6,57 | 0 |
| ENSG00000114779 | ABHD14B    | 3  | 51968510  | 51983409  | protein_coding | 6,57 | 0 |
| ENSG00000122958 | VPS26A     | 10 | 69123512  | 69172861  | protein_coding | 6,57 | 0 |
| ENSG00000272325 | NUDT3      | 6  | 34279679  | 34392674  | protein_coding | 6,56 | 0 |
| ENSG00000123213 | NLN        | 5  | 65722196  | 65871725  | protein_coding | 6,56 | 0 |
| ENSG00000118620 | ZNF430     | 19 | 21020620  | 21060050  | protein_coding | 6,56 | 0 |
| ENSG00000196792 | STRN3      | 14 | 30893799  | 31026401  | protein_coding | 6,55 | 0 |
| ENSG00000081019 | RSBN1      | 1  | 113761832 | 113812476 | protein_coding | 6,54 | 0 |
| ENSG00000221944 | TIGD1      | 2  | 232547968 | 232550592 | protein_coding | 6,54 | 0 |
| ENSG00000072954 | TMEM38A    | 19 | 16661127  | 16690029  | protein_coding | 6,54 | 0 |
| ENSG00000151729 | SLC25A4    | 4  | 185143241 | 185150382 | protein_coding | 6,53 | 0 |
| ENSG00000086189 | DIMT1      | 5  | 62387254  | 62403939  | protein_coding | 6,53 | 0 |
| ENSG00000064393 | HIPK2      | 7  | 139561570 | 139777778 | protein_coding | 6,53 | 0 |
| ENSG00000069345 | DNAJA2     | 16 | 46955362  | 46973788  | protein_coding | 6,53 | 0 |
| ENSG00000070476 | ZXDC       | 3  | 126437601 | 126475919 | protein_coding | 6,52 | 0 |
| ENSG00000076685 | NT5C2      | 10 | 103088017 | 103193306 | protein_coding | 6,52 | 0 |
| ENSG00000164172 | MOCS2      | 5  | 53095679  | 53110063  | protein_coding | 6,51 | 0 |
| ENSG00000132963 | POMP       | 13 | 28659104  | 28678925  | protein_coding | 6,51 | 0 |
| ENSG00000146834 | MEPCE      | 7  | 100428790 | 100434126 | protein_coding | 6,51 | 0 |
| ENSG00000166086 | JAM3       | 11 | 134068925 | 134152001 | protein_coding | 6,51 | 0 |
| ENSG00000100804 | PSMB5      | 14 | 23016543  | 23035230  | protein_coding | 6,51 | 0 |
| ENSG00000185942 | NKAIN3     | 8  | 62248591  | 62999652  | protein_coding | 6,50 | 0 |
| ENSG00000260097 | SPDYE6     | 7  | 102347206 | 102356444 | protein_coding | 6,50 | 0 |
| ENSG00000085733 | CTTN       | 11 | 70398404  | 70436584  | protein_coding | 6,49 | 0 |
| ENSG00000134830 | C5AR2      | 19 | 47332147  | 47347327  | protein_coding | 6,48 | 0 |
| ENSG00000137642 | SORL1      | 11 | 121452203 | 121633693 | protein_coding | 6,47 | 0 |
| ENSG00000167562 | ZNF701     | 19 | 52555822  | 52587174  | protein_coding | 6,47 | 0 |
| ENSG00000158467 | AHCYL2     | 7  | 129225023 | 129430211 | protein_coding | 6,47 | 0 |
| ENSG00000047597 | XK         | X  | 37685759  | 37732130  | protein_coding | 6,46 | 0 |
| ENSG00000105948 | TTC26      | 7  | 139133744 | 139191986 | protein_coding | 6,46 | 0 |
| ENSG00000088179 | PTPN4      | 2  | 119759631 | 119983818 | protein_coding | 6,45 | 0 |
| ENSG00000105738 | SIPA1L3    | 19 | 37907228  | 38208372  | protein_coding | 6,44 | 0 |
| ENSG00000161036 | LRWD1      | 7  | 102464929 | 102473168 | protein_coding | 6,44 | 0 |
| ENSG00000074527 | NTN4       | 12 | 95657807  | 95791152  | protein_coding | 6,44 | 0 |
| ENSG00000166974 | MAPRE2     | 18 | 34976928  | 35143470  | protein_coding | 6,44 | 0 |
| ENSG00000185591 | SP1        | 12 | 53380176  | 53416446  | protein_coding | 6,43 | 0 |
| ENSG00000269693 | ENSG000002 | 19 | 12525720  | 12580975  | protein_coding | 6,42 | 0 |
| ENSG00000161981 | SNRNP25    | 16 | 53010     | 57669     | protein_coding | 6,42 | 0 |
| ENSG00000114861 | FOXP1      | 3  | 70954693  | 71583989  | protein_coding | 6,40 | 0 |
| ENSG00000175581 | MRPL48     | 11 | 73787316  | 73865133  | protein_coding | 6,40 | 0 |
| ENSG00000170522 | ELOVL6     | 4  | 110045846 | 110199199 | protein_coding | 6,39 | 0 |



|                 |          |    |           |           |                |      |   |
|-----------------|----------|----|-----------|-----------|----------------|------|---|
| ENSG00000186448 | ZNF197   | 3  | 44584888  | 44648471  | protein_coding | 6,39 | 0 |
| ENSG00000135336 | ORC3     | 6  | 87590067  | 87667453  | protein_coding | 6,39 | 0 |
| ENSG00000142546 | NOSIP    | 19 | 49555711  | 49590262  | protein_coding | 6,39 | 0 |
| ENSG00000119231 | SENP5    | 3  | 196867856 | 196934714 | protein_coding | 6,39 | 0 |
| ENSG00000102901 | CENPT    | 16 | 67828157  | 67847811  | protein_coding | 6,39 | 0 |
| ENSG00000053371 | AKR7A2   | 1  | 19303965  | 19312146  | protein_coding | 6,38 | 0 |
| ENSG00000130935 | NOL11    | 17 | 67717833  | 67744531  | protein_coding | 6,38 | 0 |
| ENSG00000110651 | CD81     | 11 | 2376177   | 2397419   | protein_coding | 6,38 | 0 |
| ENSG00000266412 | NCOA4    | 10 | 46005088  | 46030714  | protein_coding | 6,37 | 0 |
| ENSG00000180488 | FAM73A   | 1  | 77779624  | 77879539  | protein_coding | 6,37 | 0 |
| ENSG00000151835 | SACS     | 13 | 23328823  | 23433728  | protein_coding | 6,37 | 0 |
| ENSG00000151292 | CSNK1G3  | 5  | 123512099 | 123617045 | protein_coding | 6,37 | 0 |
| ENSG00000163576 | EFHB     | 3  | 19879472  | 19947025  | protein_coding | 6,36 | 0 |
| ENSG00000189308 | LIN54    | 4  | 82909973  | 83012926  | protein_coding | 6,36 | 0 |
| ENSG00000204070 | SYS1     | 20 | 45361937  | 45376798  | protein_coding | 6,36 | 0 |
| ENSG00000171823 | FBXL14   | 12 | 1565993   | 1594165   | protein_coding | 6,36 | 0 |
| ENSG00000164048 | ZNF589   | 3  | 48241100  | 48299253  | protein_coding | 6,36 | 0 |
| ENSG00000154485 | MMP21    | 10 | 125766453 | 125775821 | protein_coding | 6,36 | 0 |
| ENSG00000137693 | YAP1     | 11 | 102110461 | 102233423 | protein_coding | 6,36 | 0 |
| ENSG00000114125 | RNF7     | 3  | 141738204 | 141747560 | protein_coding | 6,36 | 0 |
| ENSG00000118961 | LDAH     | 2  | 20684014  | 20823130  | protein_coding | 6,35 | 0 |
| ENSG00000028137 | TNFRSF1B | 1  | 12167003  | 12209228  | protein_coding | 6,35 | 0 |
| ENSG00000159147 | DONSON   | 21 | 33559542  | 33588708  | protein_coding | 6,35 | 0 |
| ENSG00000171847 | FAM90A1  | 12 | 8221260   | 8227618   | protein_coding | 6,35 | 0 |
| ENSG00000139505 | MTMR6    | 13 | 25246201  | 25288009  | protein_coding | 6,35 | 0 |
| ENSG00000050426 | LETMD1   | 12 | 51047962  | 51060424  | protein_coding | 6,35 | 0 |
| ENSG00000109814 | UGDH     | 4  | 39498755  | 39528311  | protein_coding | 6,34 | 0 |
| ENSG00000094916 | CBX5     | 12 | 54230940  | 54280133  | protein_coding | 6,33 | 0 |
| ENSG00000165533 | TTC8     | 14 | 88824153  | 88881078  | protein_coding | 6,32 | 0 |
| ENSG00000142864 | SERBP1   | 1  | 67407810  | 67430415  | protein_coding | 6,32 | 0 |
| ENSG00000105619 | TFPT     | 19 | 54107013  | 54115675  | protein_coding | 6,32 | 0 |
| ENSG00000077254 | USP33    | 1  | 77695987  | 77759852  | protein_coding | 6,32 | 0 |
| ENSG00000188501 | LCTL     | 15 | 66547179  | 66565979  | protein_coding | 6,32 | 0 |
| ENSG00000213593 | TMX2     | 11 | 57712600  | 57740973  | protein_coding | 6,32 | 0 |
| ENSG00000101442 | ACTR5    | 20 | 38748442  | 38772520  | protein_coding | 6,31 | 0 |
| ENSG00000116489 | CAPZA1   | 1  | 112619173 | 112671619 | protein_coding | 6,31 | 0 |
| ENSG00000160216 | AGPAT3   | 21 | 43865186  | 43986536  | protein_coding | 6,31 | 0 |
| ENSG00000131725 | WDR44    | X  | 118346073 | 118449961 | protein_coding | 6,31 | 0 |
| ENSG00000127995 | CASD1    | 7  | 94509219  | 94557019  | protein_coding | 6,30 | 0 |
| ENSG00000154328 | NEIL2    | 8  | 11769639  | 11787346  | protein_coding | 6,30 | 0 |
| ENSG00000175229 | GAL3ST3  | 11 | 66041952  | 66049180  | protein_coding | 6,30 | 0 |
| ENSG00000187486 | KCNJ11   | 11 | 17385859  | 17389331  | protein_coding | 6,30 | 0 |
| ENSG00000204967 | PCDHA4   | 5  | 140806929 | 141012344 | protein_coding | 6,30 | 0 |
| ENSG00000147548 | WHSC1L1  | 8  | 38269697  | 38382272  | protein_coding | 6,30 | 0 |
| ENSG00000162430 | SEPN1    | 1  | 25800176  | 25818224  | protein_coding | 6,30 | 0 |
| ENSG00000197170 | PSMD12   | 17 | 67337916  | 67366627  | protein_coding | 6,30 | 0 |
| ENSG00000189067 | LITAF    | 16 | 11547722  | 11636381  | protein_coding | 6,30 | 0 |
| ENSG00000175182 | FAM131A  | 3  | 184335926 | 184346275 | protein_coding | 6,30 | 0 |
| ENSG00000068796 | KIF2A    | 5  | 62306162  | 62537249  | protein_coding | 6,28 | 0 |
| ENSG00000184979 | USP18    | 22 | 18149899  | 18177397  | protein_coding | 6,28 | 0 |
| ENSG00000168538 | TRAPPC11 | 4  | 183659267 | 183713594 | protein_coding | 6,27 | 0 |
| ENSG00000185101 | ANO9     | 11 | 417933    | 442011    | protein_coding | 6,27 | 0 |
| ENSG00000169895 | SYAP1    | X  | 16719632  | 16765336  | protein_coding | 6,27 | 0 |
| ENSG00000021762 | OSBPL5   | 11 | 3087116   | 3166739   | protein_coding | 6,27 | 0 |
| ENSG00000159363 | ATP13A2  | 1  | 16985958  | 17011928  | protein_coding | 6,27 | 0 |
| ENSG00000160785 | SLC25A44 | 1  | 156193932 | 156212796 | protein_coding | 6,26 | 0 |
| ENSG00000128595 | CALU     | 7  | 128739292 | 128771807 | protein_coding | 6,26 | 0 |
| ENSG00000185842 | DNAH14   | 1  | 224896262 | 225399292 | protein_coding | 6,25 | 0 |

|                 |          |    |           |           |                |      |   |
|-----------------|----------|----|-----------|-----------|----------------|------|---|
| ENSG00000196268 | ZNF493   | 19 | 21397119  | 21427573  | protein_coding | 6,25 | 0 |
| ENSG00000104177 | MYEF2    | 15 | 48134631  | 48178517  | protein_coding | 6,25 | 0 |
| ENSG00000205352 | PRR13    | 12 | 53441605  | 53446645  | protein_coding | 6,25 | 0 |
| ENSG00000115317 | HTRA2    | 2  | 74529377  | 74533348  | protein_coding | 6,25 | 0 |
| ENSG00000157593 | SLC35B2  | 6  | 44254096  | 44257890  | protein_coding | 6,24 | 0 |
| ENSG00000138629 | UBL7     | 15 | 74445977  | 74461182  | protein_coding | 6,24 | 0 |
| ENSG00000087470 | DNM1L    | 12 | 32679200  | 32745650  | protein_coding | 6,24 | 0 |
| ENSG00000123080 | CDKN2C   | 1  | 50960745  | 50974633  | protein_coding | 6,24 | 0 |
| ENSG00000198276 | UCKL1    | 20 | 63939829  | 63956415  | protein_coding | 6,24 | 0 |
| ENSG00000080822 | CLDND1   | 3  | 98497912  | 98523066  | protein_coding | 6,23 | 0 |
| ENSG00000135720 | DYNC1LI2 | 16 | 66720893  | 66751798  | protein_coding | 6,23 | 0 |
| ENSG00000139644 | TMBIM6   | 12 | 49707725  | 49764934  | protein_coding | 6,23 | 0 |
| ENSG00000174444 | RPL4     | 15 | 66498015  | 66524532  | protein_coding | 6,23 | 0 |
| ENSG00000151276 | MAGI1    | 3  | 65353525  | 66038834  | protein_coding | 6,23 | 0 |
| ENSG00000125520 | SLC2A4RG | 20 | 63739861  | 63743505  | protein_coding | 6,22 | 0 |
| ENSG00000113384 | GOLPH3   | 5  | 32124704  | 32174350  | protein_coding | 6,22 | 0 |
| ENSG00000106344 | RBM28    | 7  | 128297685 | 128343908 | protein_coding | 6,22 | 0 |
| ENSG00000117143 | UAP1     | 1  | 162561506 | 162599842 | protein_coding | 6,22 | 0 |
| ENSG00000213918 | DNASE1   | 16 | 3611728   | 3680143   | protein_coding | 6,21 | 0 |
| ENSG00000196378 | ZNF34    | 8  | 144773114 | 144787345 | protein_coding | 6,21 | 0 |
| ENSG00000157540 | DYRK1A   | 21 | 37365790  | 37517450  | protein_coding | 6,21 | 0 |
| ENSG00000131558 | EXOC4    | 7  | 133253073 | 134066589 | protein_coding | 6,21 | 0 |
| ENSG00000174804 | FZD4     | 11 | 86945679  | 86955391  | protein_coding | 6,21 | 0 |
| ENSG00000129009 | ISLR     | 15 | 74173671  | 74176872  | protein_coding | 6,20 | 0 |
| ENSG00000186399 | GOLGA8R  | 15 | 30403740  | 30414162  | protein_coding | 6,20 | 0 |
| ENSG00000215712 | TMEM242  | 6  | 157289386 | 157323601 | protein_coding | 6,19 | 0 |
| ENSG00000213626 | LBH      | 2  | 30231531  | 30323730  | protein_coding | 6,19 | 0 |
| ENSG00000134900 | TPP2     | 13 | 102597003 | 102679958 | protein_coding | 6,19 | 0 |
| ENSG00000160193 | WDR4     | 21 | 42843094  | 42879568  | protein_coding | 6,19 | 0 |
| ENSG00000165240 | ATP7A    | X  | 77910656  | 78050395  | protein_coding | 6,19 | 0 |
| ENSG00000166411 | IDH3A    | 15 | 78131498  | 78171949  | protein_coding | 6,18 | 0 |
| ENSG00000188158 | NHS      | X  | 17375420  | 17735994  | protein_coding | 6,18 | 0 |
| ENSG00000137871 | ZNF280D  | 15 | 56630181  | 56918571  | protein_coding | 6,18 | 0 |
| ENSG00000102858 | MGRN1    | 16 | 4616493   | 4690974   | protein_coding | 6,18 | 0 |
| ENSG00000015153 | YAF2     | 12 | 42157104  | 42238349  | protein_coding | 6,18 | 0 |
| ENSG00000159592 | GPBP1L1  | 1  | 45627304  | 45688113  | protein_coding | 6,18 | 0 |
| ENSG00000161057 | PSMC2    | 7  | 103344254 | 103369395 | protein_coding | 6,17 | 0 |
| ENSG00000145725 | PPIP5K2  | 5  | 103120149 | 103212799 | protein_coding | 6,17 | 0 |
| ENSG00000182362 | YBEY     | 21 | 46286337  | 46297751  | protein_coding | 6,17 | 0 |
| ENSG00000178057 | NDUFAF3  | 3  | 49020459  | 49023495  | protein_coding | 6,17 | 0 |
| ENSG00000137414 | FAM8A1   | 6  | 17600355  | 17611719  | protein_coding | 6,17 | 0 |
| ENSG00000185869 | ZNF829   | 19 | 36888124  | 36916291  | protein_coding | 6,17 | 0 |
| ENSG00000107798 | LIPA     | 10 | 89213569  | 89414557  | protein_coding | 6,17 | 0 |
| ENSG00000161298 | ZNF382   | 19 | 36604817  | 36634113  | protein_coding | 6,17 | 0 |
| ENSG00000188227 | ZNF793   | 19 | 37506939  | 37548762  | protein_coding | 6,16 | 0 |
| ENSG00000117569 | PTBP2    | 1  | 96721665  | 96823738  | protein_coding | 6,16 | 0 |
| ENSG00000088832 | FKBP1A   | 20 | 1368978   | 1393172   | protein_coding | 6,16 | 0 |
| ENSG00000135845 | PIGC     | 1  | 172370189 | 172444086 | protein_coding | 6,15 | 0 |
| ENSG00000188295 | ZNF669   | 1  | 247099962 | 247104372 | protein_coding | 6,15 | 0 |
| ENSG00000089916 | GPATCH2L | 14 | 76151916  | 76254342  | protein_coding | 6,15 | 0 |
| ENSG00000097096 | SYDE2    | 1  | 85156873  | 85201046  | protein_coding | 6,15 | 0 |
| ENSG00000128908 | INO80    | 15 | 40978880  | 41116354  | protein_coding | 6,15 | 0 |
| ENSG00000121644 | DESI2    | 1  | 244652935 | 244709033 | protein_coding | 6,15 | 0 |
| ENSG00000119596 | YLPM1    | 14 | 74763366  | 74859435  | protein_coding | 6,14 | 0 |
| ENSG00000137776 | SLTM     | 15 | 58879045  | 58933653  | protein_coding | 6,14 | 0 |
| ENSG00000137274 | BPHL     | 6  | 3118374   | 3153578   | protein_coding | 6,14 | 0 |
| ENSG00000129696 | TTI2     | 8  | 33473386  | 33513601  | protein_coding | 6,14 | 0 |
| ENSG00000115310 | RTN4     | 2  | 54972187  | 55112621  | protein_coding | 6,14 | 0 |

|                 |            |    |           |           |                |      |   |
|-----------------|------------|----|-----------|-----------|----------------|------|---|
| ENSG00000185278 | ZBTB37     | 1  | 173868082 | 173903549 | protein_coding | 6,14 | 0 |
| ENSG00000187118 | CMC1       | 3  | 28241584  | 28325142  | protein_coding | 6,13 | 0 |
| ENSG00000258289 | CHURC1     | 14 | 64914361  | 64944591  | protein_coding | 6,12 | 0 |
| ENSG00000187554 | TLR5       | 1  | 223109406 | 223143282 | protein_coding | 6,12 | 0 |
| ENSG00000198707 | CEP290     | 12 | 88049014  | 88142216  | protein_coding | 6,12 | 0 |
| ENSG00000196793 | ZNF239     | 10 | 43556344  | 43574618  | protein_coding | 6,11 | 0 |
| ENSG00000176095 | IP6K1      | 3  | 49724294  | 49786542  | protein_coding | 6,10 | 0 |
| ENSG00000160294 | MCM3AP     | 21 | 46235126  | 46286297  | protein_coding | 6,10 | 0 |
| ENSG00000152213 | ARL11      | 13 | 49628299  | 49633872  | protein_coding | 6,10 | 0 |
| ENSG00000213204 | ENSG000002 | 6  | 87408012  | 87511634  | protein_coding | 6,10 | 0 |
| ENSG00000163993 | S100P      | 4  | 6693069   | 6697170   | protein_coding | 6,10 | 0 |
| ENSG00000125944 | HNRNPR     | 1  | 23303771  | 23344336  | protein_coding | 6,10 | 0 |
| ENSG00000115993 | TRAK2      | 2  | 201377207 | 201451611 | protein_coding | 6,09 | 0 |
| ENSG00000151366 | NDUFC2     | 11 | 78068304  | 78080219  | protein_coding | 6,08 | 0 |
| ENSG00000092010 | PSME1      | 14 | 24136158  | 24138967  | protein_coding | 6,08 | 0 |
| ENSG00000132676 | DAP3       | 1  | 155687960 | 155739010 | protein_coding | 6,08 | 0 |
| ENSG00000088682 | COQ9       | 16 | 57447425  | 57461275  | protein_coding | 6,08 | 0 |
| ENSG00000173517 | PEAK1      | 15 | 77100656  | 77420144  | protein_coding | 6,08 | 0 |
| ENSG00000198728 | LDB1       | 10 | 102107560 | 102120453 | protein_coding | 6,07 | 0 |
| ENSG00000108389 | MTMR4      | 17 | 58489529  | 58517905  | protein_coding | 6,06 | 0 |
| ENSG00000162384 | C1orf123   | 1  | 53214099  | 53220617  | protein_coding | 6,06 | 0 |
| ENSG00000128829 | EIF2AK4    | 15 | 39934146  | 40035591  | protein_coding | 6,06 | 0 |
| ENSG00000133401 | PDZD2      | 5  | 31639410  | 32110931  | protein_coding | 6,05 | 0 |
| ENSG00000054523 | KIF1B      | 1  | 10210805  | 10381603  | protein_coding | 6,05 | 0 |
| ENSG00000177932 | ZNF354C    | 5  | 179060415 | 179083537 | protein_coding | 6,05 | 0 |
| ENSG00000138768 | USO1       | 4  | 75724593  | 75814286  | protein_coding | 6,05 | 0 |
| ENSG00000091164 | TXNL1      | 18 | 56597208  | 56651600  | protein_coding | 6,05 | 0 |
| ENSG00000197563 | PIGN       | 18 | 62043567  | 62187118  | protein_coding | 6,04 | 0 |
| ENSG00000101189 | MRGBP      | 20 | 62796453  | 62801738  | protein_coding | 6,02 | 0 |
| ENSG00000198586 | TLK1       | 2  | 170990823 | 171231314 | protein_coding | 6,01 | 0 |
| ENSG00000135999 | EPC2       | 2  | 148644440 | 148787568 | protein_coding | 6,01 | 0 |
| ENSG00000186260 | MKL2       | 16 | 14071321  | 14266773  | protein_coding | 6,01 | 0 |
| ENSG00000107789 | MINPP1     | 10 | 87504875  | 87553460  | protein_coding | 6,01 | 0 |
| ENSG00000141279 | NPEPPS     | 17 | 47522942  | 47623276  | protein_coding | 6,00 | 0 |
| ENSG00000130943 | PKDREJ     | 22 | 46255663  | 46263355  | protein_coding | 6,00 | 0 |
| ENSG00000180881 | CAPS2      | 12 | 75275979  | 75390928  | protein_coding | 6,00 | 0 |
| ENSG00000143740 | SNAP47     | 1  | 227728539 | 227781231 | protein_coding | 6,00 | 0 |
| ENSG00000139926 | FRMD6      | 14 | 51489100  | 51730727  | protein_coding | 5,99 | 0 |
| ENSG00000171448 | ZBTB26     | 9  | 122915566 | 122931500 | protein_coding | 5,99 | 0 |
| ENSG00000162377 | COA7       | 1  | 52684451  | 52698366  | protein_coding | 5,99 | 0 |
| ENSG00000102931 | ARL2BP     | 16 | 57245098  | 57253635  | protein_coding | 5,99 | 0 |
| ENSG00000114316 | USP4       | 3  | 49277831  | 49340712  | protein_coding | 5,97 | 0 |
| ENSG00000105221 | AKT2       | 19 | 40230317  | 40285536  | protein_coding | 5,97 | 0 |
| ENSG00000063978 | RNF4       | 4  | 2462220   | 2625320   | protein_coding | 5,97 | 0 |
| ENSG00000084731 | KIF3C      | 2  | 25926596  | 25982749  | protein_coding | 5,96 | 0 |
| ENSG00000157036 | EXOG       | 3  | 38496127  | 38542161  | protein_coding | 5,96 | 0 |
| ENSG00000139219 | COL2A1     | 12 | 47972965  | 48004486  | protein_coding | 5,95 | 0 |
| ENSG00000126777 | KTN1       | 14 | 55559072  | 55701526  | protein_coding | 5,95 | 0 |
| ENSG00000126088 | UROD       | 1  | 45012147  | 45015575  | protein_coding | 5,95 | 0 |
| ENSG00000254726 | MEX3A      | 1  | 156072013 | 156081998 | protein_coding | 5,95 | 0 |
| ENSG00000164061 | BSN        | 3  | 49554489  | 49671545  | protein_coding | 5,95 | 0 |
| ENSG00000204560 | DHX16      | 6  | 30653119  | 30673037  | protein_coding | 5,94 | 0 |
| ENSG00000265241 | RBM8A      | 1  | 145917714 | 145927678 | protein_coding | 5,94 | 0 |
| ENSG00000249115 | HAUS5      | 19 | 35612744  | 35625349  | protein_coding | 5,93 | 0 |
| ENSG00000184436 | THAP7      | 22 | 20999104  | 21002196  | protein_coding | 5,93 | 0 |
| ENSG00000011260 | UTP18      | 17 | 51260528  | 51297936  | protein_coding | 5,92 | 0 |
| ENSG00000169288 | MRPL1      | 4  | 77862520  | 77952790  | protein_coding | 5,92 | 0 |
| ENSG00000154978 | VOPP1      | 7  | 55436056  | 55572988  | protein_coding | 5,92 | 0 |

|                 |            |    |           |           |                |      |   |
|-----------------|------------|----|-----------|-----------|----------------|------|---|
| ENSG00000148634 | HERC4      | 10 | 67921899  | 68075348  | protein_coding | 5,91 | 0 |
| ENSG00000137845 | ADAM10     | 15 | 58588807  | 58749978  | protein_coding | 5,91 | 0 |
| ENSG00000134371 | CDC73      | 1  | 193122017 | 193253901 | protein_coding | 5,91 | 0 |
| ENSG00000173402 | DAG1       | 3  | 49468703  | 49535618  | protein_coding | 5,91 | 0 |
| ENSG00000186994 | KANK3      | 19 | 8322584   | 8343262   | protein_coding | 5,91 | 0 |
| ENSG00000181027 | FKRP       | 19 | 46746046  | 46776988  | protein_coding | 5,91 | 0 |
| ENSG00000141456 | PELP1      | 17 | 4669774   | 4704337   | protein_coding | 5,91 | 0 |
| ENSG00000101349 | PAK7       | 20 | 9537389   | 9839041   | protein_coding | 5,90 | 0 |
| ENSG00000261582 | ENSG000002 | 20 | 35267885  | 35280043  | protein_coding | 5,90 | 0 |
| ENSG00000172954 | LCLAT1     | 2  | 30447226  | 30644225  | protein_coding | 5,90 | 0 |
| ENSG00000188177 | ZC3H6      | 2  | 112275594 | 112340063 | protein_coding | 5,90 | 0 |
| ENSG00000177565 | TBL1XR1    | 3  | 177019355 | 177197396 | protein_coding | 5,90 | 0 |
| ENSG00000163807 | KIAA1143   | 3  | 44737661  | 44761662  | protein_coding | 5,89 | 0 |
| ENSG00000198382 | UVRAG      | 11 | 75815167  | 76143195  | protein_coding | 5,89 | 0 |
| ENSG00000178234 | GALNT11    | 7  | 152025674 | 152122347 | protein_coding | 5,89 | 0 |
| ENSG00000131473 | ACLY       | 17 | 41866908  | 41930542  | protein_coding | 5,89 | 0 |
| ENSG00000147274 | RBMX       | X  | 136848004 | 136880764 | protein_coding | 5,89 | 0 |
| ENSG00000145916 | RMND5B     | 5  | 178130996 | 178150565 | protein_coding | 5,89 | 0 |
| ENSG00000166169 | POLL       | 10 | 101578882 | 101588270 | protein_coding | 5,89 | 0 |
| ENSG00000058063 | ATP11B     | 3  | 182793500 | 182921635 | protein_coding | 5,88 | 0 |
| ENSG00000138386 | NAB1       | 2  | 190646746 | 190692766 | protein_coding | 5,87 | 0 |
| ENSG00000170417 | TMEM182    | 2  | 102736908 | 102843893 | protein_coding | 5,87 | 0 |
| ENSG00000256683 | ZNF350     | 19 | 51964343  | 51986856  | protein_coding | 5,87 | 0 |
| ENSG00000073578 | SDHA       | 5  | 218241    | 256700    | protein_coding | 5,87 | 0 |
| ENSG00000116514 | RNF19B     | 1  | 32936445  | 32964685  | protein_coding | 5,87 | 0 |
| ENSG00000181220 | ZNF746     | 7  | 149472794 | 149497817 | protein_coding | 5,85 | 0 |
| ENSG00000048991 | R3HDM1     | 2  | 135531455 | 135725270 | protein_coding | 5,85 | 0 |
| ENSG00000188167 | TMPPE      | 3  | 33090421  | 33096801  | protein_coding | 5,85 | 0 |
| ENSG00000149380 | P4HA3      | 11 | 74235801  | 74311657  | protein_coding | 5,84 | 0 |
| ENSG00000185414 | MRPL30     | 2  | 99181079  | 99197626  | protein_coding | 5,84 | 0 |
| ENSG00000132182 | NUP210     | 3  | 13316235  | 13420309  | protein_coding | 5,84 | 0 |
| ENSG00000213516 | RBMXL1     | 1  | 88979456  | 88992960  | protein_coding | 5,84 | 0 |
| ENSG00000170191 | NANP       | 20 | 25612935  | 25624175  | protein_coding | 5,84 | 0 |
| ENSG00000175764 | TLL1       | 9  | 121821928 | 122093606 | protein_coding | 5,83 | 0 |
| ENSG00000157510 | AFAP1L1    | 5  | 149271871 | 149341802 | protein_coding | 5,83 | 0 |
| ENSG00000144848 | ATG3       | 3  | 112532509 | 112562046 | protein_coding | 5,83 | 0 |
| ENSG00000099246 | RAB18      | 10 | 27504174  | 27542237  | protein_coding | 5,83 | 0 |
| ENSG00000115685 | PPP1R7     | 2  | 241149576 | 241183652 | protein_coding | 5,83 | 0 |
| ENSG00000090432 | MUL1       | 1  | 20499448  | 20508161  | protein_coding | 5,83 | 0 |
| ENSG00000092203 | TOX4       | 14 | 21476597  | 21499175  | protein_coding | 5,82 | 0 |
| ENSG00000159346 | ADIPOR1    | 1  | 202940823 | 202958572 | protein_coding | 5,82 | 0 |
| ENSG00000138119 | MYOF       | 10 | 93306429  | 93482317  | protein_coding | 5,82 | 0 |
| ENSG00000083896 | YTHDC1     | 4  | 68310387  | 68350089  | protein_coding | 5,82 | 0 |
| ENSG00000130726 | TRIM28     | 19 | 58544091  | 58550722  | protein_coding | 5,82 | 0 |
| ENSG00000139921 | TMX1       | 14 | 51240162  | 51257546  | protein_coding | 5,81 | 0 |
| ENSG00000100316 | RPL3       | 22 | 39312882  | 39320389  | protein_coding | 5,81 | 0 |
| ENSG00000146411 | SLC2A12    | 6  | 133988697 | 134052636 | protein_coding | 5,81 | 0 |
| ENSG00000158321 | AUTS2      | 7  | 69598919  | 70793068  | protein_coding | 5,81 | 0 |
| ENSG00000135316 | SYNCRIP    | 6  | 85607785  | 85643792  | protein_coding | 5,81 | 0 |
| ENSG00000048471 | SNX29      | 16 | 11976737  | 12574289  | protein_coding | 5,81 | 0 |
| ENSG00000156508 | EEF1A1     | 6  | 73515750  | 73523797  | protein_coding | 5,81 | 0 |
| ENSG00000150907 | FOXO1      | 13 | 40555667  | 40666597  | protein_coding | 5,80 | 0 |
| ENSG00000100078 | PLA2G3     | 22 | 31134809  | 31140607  | protein_coding | 5,80 | 0 |
| ENSG00000269533 | ENSG000002 | 19 | 57389884  | 57419994  | protein_coding | 5,80 | 0 |
| ENSG00000271503 | CCL5       | 17 | 35871491  | 35880793  | protein_coding | 5,80 | 0 |
| ENSG00000186583 | SPATC1     | 8  | 144012414 | 144047085 | protein_coding | 5,80 | 0 |
| ENSG00000114812 | VIPR1      | 3  | 42489299  | 42537573  | protein_coding | 5,80 | 0 |
| ENSG00000173436 | MINOS1     | 1  | 19596977  | 19629821  | protein_coding | 5,80 | 0 |

|                 |          |    |           |           |                |      |   |
|-----------------|----------|----|-----------|-----------|----------------|------|---|
| ENSG00000111237 | VPS29    | 12 | 110491097 | 110502117 | protein_coding | 5,80 | 0 |
| ENSG00000121289 | CEP89    | 19 | 32875925  | 32971991  | protein_coding | 5,79 | 0 |
| ENSG00000164975 | SNAPC3   | 9  | 15422704  | 15465953  | protein_coding | 5,79 | 0 |
| ENSG00000092140 | G2E3     | 14 | 30559123  | 30620063  | protein_coding | 5,78 | 0 |
| ENSG00000206535 | LNP1     | 3  | 100401193 | 100456319 | protein_coding | 5,78 | 0 |
| ENSG00000164037 | SLC9B1   | 4  | 102885048 | 103019739 | protein_coding | 5,78 | 0 |
| ENSG00000120053 | GOT1     | 10 | 99396870  | 99430624  | protein_coding | 5,78 | 0 |
| ENSG00000006831 | ADIPOR2  | 12 | 1688574   | 1788678   | protein_coding | 5,78 | 0 |
| ENSG00000159445 | THEM4    | 1  | 151873584 | 151909808 | protein_coding | 5,78 | 0 |
| ENSG00000182400 | TRAPPC6B | 14 | 39147811  | 39170532  | protein_coding | 5,77 | 0 |
| ENSG00000143756 | FBXO28   | 1  | 224114087 | 224162047 | protein_coding | 5,77 | 0 |
| ENSG00000163714 | U2SURP   | 3  | 142964497 | 143060546 | protein_coding | 5,77 | 0 |
| ENSG00000065135 | GNAI3    | 1  | 109548611 | 109618321 | protein_coding | 5,76 | 0 |
| ENSG00000171574 | ZNF584   | 19 | 58401504  | 58418327  | protein_coding | 5,76 | 0 |
| ENSG00000183087 | GAS6     | 13 | 113820549 | 113864067 | protein_coding | 5,76 | 0 |
| ENSG00000183309 | ZNF623   | 8  | 143636013 | 143656418 | protein_coding | 5,76 | 0 |
| ENSG00000171877 | FRMD5    | 15 | 43870761  | 44195252  | protein_coding | 5,76 | 0 |
| ENSG00000155506 | LARP1    | 5  | 154712902 | 154817607 | protein_coding | 5,75 | 0 |
| ENSG00000167555 | ZNF528   | 19 | 52397849  | 52418412  | protein_coding | 5,75 | 0 |
| ENSG00000102189 | EEA1     | 12 | 92770637  | 92929331  | protein_coding | 5,75 | 0 |
| ENSG00000137497 | NUMA1    | 11 | 72002864  | 72080693  | protein_coding | 5,74 | 0 |
| ENSG00000090686 | USP48    | 1  | 21678298  | 21783606  | protein_coding | 5,73 | 0 |
| ENSG00000158793 | NIT1     | 1  | 161118086 | 161125445 | protein_coding | 5,73 | 0 |
| ENSG00000126953 | TIMM8A   | X  | 101345661 | 101349196 | protein_coding | 5,73 | 0 |
| ENSG00000110274 | CEP164   | 11 | 117314557 | 117413268 | protein_coding | 5,73 | 0 |
| ENSG00000119411 | BSPRY    | 9  | 113349541 | 113371233 | protein_coding | 5,73 | 0 |
| ENSG00000143549 | TPM3     | 1  | 154155304 | 154194648 | protein_coding | 5,73 | 0 |
| ENSG00000119335 | SET      | 9  | 128683424 | 128696400 | protein_coding | 5,72 | 0 |
| ENSG00000183287 | CCBE1    | 18 | 59430940  | 59697380  | protein_coding | 5,71 | 0 |
| ENSG00000144535 | DIS3L2   | 2  | 231961245 | 232344350 | protein_coding | 5,71 | 0 |
| ENSG00000171608 | PIK3CD   | 1  | 9651732   | 9729114   | protein_coding | 5,71 | 0 |
| ENSG00000182247 | UBE2E2   | 3  | 23203020  | 23591793  | protein_coding | 5,71 | 0 |
| ENSG00000148814 | LRRC27   | 10 | 132332154 | 132379918 | protein_coding | 5,71 | 0 |
| ENSG00000104723 | TUSC3    | 8  | 15417215  | 15766649  | protein_coding | 5,71 | 0 |
| ENSG00000106733 | NMRK1    | 9  | 75060573  | 75088217  | protein_coding | 5,70 | 0 |
| ENSG00000168883 | USP39    | 2  | 85602856  | 85649282  | protein_coding | 5,70 | 0 |
| ENSG00000162521 | RBBP4    | 1  | 32651142  | 32686211  | protein_coding | 5,70 | 0 |
| ENSG00000155097 | ATP6V1C1 | 8  | 103021063 | 103073051 | protein_coding | 5,70 | 0 |
| ENSG00000127838 | PNKD     | 2  | 218270392 | 218346793 | protein_coding | 5,69 | 0 |
| ENSG00000117016 | RIMS3    | 1  | 40620679  | 40665657  | protein_coding | 5,69 | 0 |
| ENSG00000135655 | USP15    | 12 | 62260338  | 62417431  | protein_coding | 5,69 | 0 |
| ENSG00000170954 | ZNF415   | 19 | 53107879  | 53133077  | protein_coding | 5,69 | 0 |
| ENSG00000109184 | DCUN1D4  | 4  | 51843000  | 51916837  | protein_coding | 5,69 | 0 |
| ENSG00000123607 | TTC21B   | 2  | 165857475 | 165953843 | protein_coding | 5,69 | 0 |
| ENSG00000169504 | CLIC4    | 1  | 24745357  | 24844324  | protein_coding | 5,68 | 0 |
| ENSG00000157741 | UBN2     | 7  | 139230356 | 139308236 | protein_coding | 5,68 | 0 |
| ENSG00000145907 | G3BP1    | 5  | 151771045 | 151812785 | protein_coding | 5,68 | 0 |
| ENSG00000172845 | SP3      | 2  | 173906459 | 173965702 | protein_coding | 5,67 | 0 |
| ENSG00000167315 | ACAA2    | 18 | 49782167  | 49813960  | protein_coding | 5,67 | 0 |
| ENSG00000110031 | LPXN     | 11 | 58526871  | 58578220  | protein_coding | 5,67 | 0 |
| ENSG00000116005 | PCYOX1   | 2  | 70257386  | 70281191  | protein_coding | 5,66 | 0 |
| ENSG00000101407 | TTI1     | 20 | 37983007  | 38033468  | protein_coding | 5,66 | 0 |
| ENSG00000143479 | DYRK3    | 1  | 206635536 | 206684419 | protein_coding | 5,66 | 0 |
| ENSG00000198162 | MAN1A2   | 1  | 117367449 | 117528872 | protein_coding | 5,66 | 0 |
| ENSG00000121774 | KHDRBS1  | 1  | 32013829  | 32060850  | protein_coding | 5,66 | 0 |
| ENSG00000137474 | MYO7A    | 11 | 77128264  | 77215239  | protein_coding | 5,66 | 0 |
| ENSG00000153339 | TRAPPC8  | 18 | 31829173  | 31953136  | protein_coding | 5,65 | 0 |
| ENSG00000170142 | UBE2E1   | 3  | 23805903  | 23891316  | protein_coding | 5,65 | 0 |

|                 |            |    |           |           |                |      |   |
|-----------------|------------|----|-----------|-----------|----------------|------|---|
| ENSG00000163625 | WDFY3      | 4  | 84669610  | 84966391  | protein_coding | 5,65 | 0 |
| ENSG0000029363  | BCLAF1     | 6  | 136256863 | 136289851 | protein_coding | 5,64 | 0 |
| ENSG00000162391 | FAM151A    | 1  | 54609182  | 54623556  | protein_coding | 5,64 | 0 |
| ENSG00000151065 | DCP1B      | 12 | 1946054   | 2004535   | protein_coding | 5,63 | 0 |
| ENSG00000083312 | TNPO1      | 5  | 72816312  | 72916733  | protein_coding | 5,63 | 0 |
| ENSG00000095066 | HOOK2      | 19 | 12763003  | 12872740  | protein_coding | 5,63 | 0 |
| ENSG00000180370 | PAK2       | 3  | 196739857 | 196832647 | protein_coding | 5,63 | 0 |
| ENSG00000108669 | CYTH1      | 17 | 78674048  | 78782297  | protein_coding | 5,62 | 0 |
| ENSG00000088247 | KHSRP      | 19 | 6413348   | 6424794   | protein_coding | 5,61 | 0 |
| ENSG00000155561 | NUP205     | 7  | 135557919 | 135648757 | protein_coding | 5,61 | 0 |
| ENSG00000275835 | TUBGCP5    | 15 | 22983192  | 23039673  | protein_coding | 5,61 | 0 |
| ENSG00000144445 | KANSL1L    | 2  | 210021423 | 210171383 | protein_coding | 5,61 | 0 |
| ENSG00000166260 | COX11      | 17 | 54951902  | 54968785  | protein_coding | 5,60 | 0 |
| ENSG00000005189 | ENSG000000 | 16 | 20806429  | 20849668  | protein_coding | 5,60 | 0 |
| ENSG00000137878 | GCOM1      | 15 | 57591908  | 57714745  | protein_coding | 5,60 | 0 |
| ENSG00000075089 | ACTR6      | 12 | 100199122 | 100241865 | protein_coding | 5,60 | 0 |
| ENSG00000125910 | S1PR4      | 19 | 3172346   | 3180332   | protein_coding | 5,60 | 0 |
| ENSG00000129465 | RIPK3      | 14 | 24336021  | 24340045  | protein_coding | 5,60 | 0 |
| ENSG00000101473 | ACOT8      | 20 | 45841721  | 45857406  | protein_coding | 5,60 | 0 |
| ENSG00000130479 | MAP1S      | 19 | 17719242  | 17734516  | protein_coding | 5,59 | 0 |
| ENSG00000101191 | DIDO1      | 20 | 62877738  | 62937952  | protein_coding | 5,59 | 0 |
| ENSG00000143322 | ABL2       | 1  | 179099327 | 179229684 | protein_coding | 5,58 | 0 |
| ENSG00000128011 | LRFN1      | 19 | 39306568  | 39315336  | protein_coding | 5,58 | 0 |
| ENSG00000141219 | C17orf80   | 17 | 73232233  | 73248947  | protein_coding | 5,57 | 0 |
| ENSG00000172380 | GNG12      | 1  | 67701466  | 67833467  | protein_coding | 5,57 | 0 |
| ENSG00000101216 | GMEB2      | 20 | 63587602  | 63627041  | protein_coding | 5,57 | 0 |
| ENSG00000197601 | FAR1       | 11 | 13668670  | 13732346  | protein_coding | 5,53 | 0 |
| ENSG00000175054 | ATR        | 3  | 142449235 | 142578826 | protein_coding | 5,53 | 0 |
| ENSG00000171798 | KNDC1      | 10 | 133160447 | 133226412 | protein_coding | 5,52 | 0 |
| ENSG00000116205 | TCEANC2    | 1  | 54053587  | 54112519  | protein_coding | 5,52 | 0 |
| ENSG00000176974 | SHMT1      | 17 | 18327860  | 18363563  | protein_coding | 5,52 | 0 |
| ENSG00000164484 | TMEM200A   | 6  | 130365734 | 130443063 | protein_coding | 5,51 | 0 |
| ENSG00000136868 | SLC31A1    | 9  | 113221562 | 113264492 | protein_coding | 5,51 | 0 |
| ENSG00000170889 | RPS9       | 19 | 54200742  | 54249003  | protein_coding | 5,50 | 0 |
| ENSG00000100033 | PRODH      | 22 | 18912777  | 18936553  | protein_coding | 5,50 | 0 |
| ENSG00000274322 | ENSG000002 | 20 | 1317571   | 1393096   | protein_coding | 5,50 | 0 |
| ENSG00000182327 | GLTPD2     | 17 | 4788959   | 4790390   | protein_coding | 5,50 | 0 |
| ENSG00000186354 | C9orf47    | 9  | 88990863  | 88996140  | protein_coding | 5,50 | 0 |
| ENSG00000173320 | STOX2      | 4  | 183853431 | 184023526 | protein_coding | 5,50 | 0 |
| ENSG00000213614 | HEXA       | 15 | 72340919  | 72376476  | protein_coding | 5,50 | 0 |
| ENSG00000169764 | UGP2       | 2  | 63840940  | 63891562  | protein_coding | 5,50 | 0 |
| ENSG00000186666 | BCDIN3D    | 12 | 49836039  | 49843129  | protein_coding | 5,49 | 0 |
| ENSG00000164168 | TMEM184C   | 4  | 147617383 | 147672044 | protein_coding | 5,49 | 0 |
| ENSG00000180096 | 09/01/2001 | 16 | 30378133  | 30395991  | protein_coding | 5,49 | 0 |
| ENSG00000137312 | FLOT1      | 6  | 30727709  | 30742733  | protein_coding | 5,49 | 0 |
| ENSG00000121764 | HCRTR1     | 1  | 31617686  | 31632518  | protein_coding | 5,49 | 0 |
| ENSG00000279018 | ENSG000002 | 16 | 53207941  | 53226385  | protein_coding | 5,48 | 0 |
| ENSG00000078967 | UBE2D4     | 7  | 43926438  | 43956136  | protein_coding | 5,47 | 0 |
| ENSG00000136866 | ZFP37      | 9  | 113038380 | 113056759 | protein_coding | 5,47 | 0 |
| ENSG00000077147 | TM9SF3     | 10 | 96518109  | 96587452  | protein_coding | 5,46 | 0 |
| ENSG00000135932 | CAB39      | 2  | 230712845 | 230821075 | protein_coding | 5,45 | 0 |
| ENSG00000101849 | TBL1X      | X  | 9463295   | 9719743   | protein_coding | 5,44 | 0 |
| ENSG00000100526 | CDKN3      | 14 | 54396849  | 54420218  | protein_coding | 5,44 | 0 |
| ENSG00000157796 | WDR19      | 4  | 39182404  | 39285810  | protein_coding | 5,44 | 0 |
| ENSG00000197622 | CDC42SE1   | 1  | 151050971 | 151070325 | protein_coding | 5,43 | 0 |
| ENSG00000112218 | GPR63      | 6  | 96794126  | 96837463  | protein_coding | 5,41 | 0 |
| ENSG00000118705 | RPN2       | 20 | 37178410  | 37241623  | protein_coding | 5,41 | 0 |
| ENSG00000196569 | LAMA2      | 6  | 128883141 | 129516569 | protein_coding | 5,41 | 0 |

|                 |            |    |           |           |                |      |   |
|-----------------|------------|----|-----------|-----------|----------------|------|---|
| ENSG0000065883  | CDK13      | 7  | 39950037  | 40097134  | protein_coding | 5,41 | 0 |
| ENSG0000079785  | DDX1       | 2  | 15591178  | 15631111  | protein_coding | 5,41 | 0 |
| ENSG00000205208 | C4orf46    | 4  | 158666679 | 158672255 | protein_coding | 5,41 | 0 |
| ENSG00000132275 | RRP8       | 11 | 6595075   | 6603620   | protein_coding | 5,41 | 0 |
| ENSG00000163812 | ZDHHC3     | 3  | 44915257  | 44976185  | protein_coding | 5,41 | 0 |
| ENSG00000155906 | RMND1      | 6  | 151404763 | 151452181 | protein_coding | 5,40 | 0 |
| ENSG00000184428 | TOP1MT     | 8  | 143304384 | 143359979 | protein_coding | 5,40 | 0 |
| ENSG00000147454 | SLC25A37   | 8  | 23528805  | 23575463  | protein_coding | 5,40 | 0 |
| ENSG00000114850 | SSR3       | 3  | 156540140 | 156555184 | protein_coding | 5,40 | 0 |
| ENSG00000154080 | CHST9      | 18 | 26906481  | 27185317  | protein_coding | 5,40 | 0 |
| ENSG00000106714 | CNTNAP3    | 9  | 39072767  | 39288315  | protein_coding | 5,40 | 0 |
| ENSG00000196747 | HIST1H2AI  | 6  | 27808199  | 27808701  | protein_coding | 5,40 | 0 |
| ENSG00000211452 | DIO1       | 1  | 53891239  | 53911086  | protein_coding | 5,40 | 0 |
| ENSG00000172113 | NME6       | 3  | 48293264  | 48301685  | protein_coding | 5,40 | 0 |
| ENSG00000133424 | LARGE      | 22 | 33162226  | 33922841  | protein_coding | 5,39 | 0 |
| ENSG00000159753 | RLTPR      | 16 | 67644919  | 67657569  | protein_coding | 5,39 | 0 |
| ENSG00000143499 | SMYD2      | 1  | 214281102 | 214337131 | protein_coding | 5,39 | 0 |
| ENSG00000116663 | FBXO6      | 1  | 11664124  | 11674354  | protein_coding | 5,39 | 0 |
| ENSG00000168522 | FNTA       | 8  | 43034194  | 43085788  | protein_coding | 5,39 | 0 |
| ENSG00000161594 | KLHL10     | 17 | 41835685  | 41848384  | protein_coding | 5,38 | 0 |
| ENSG00000117481 | NSUN4      | 1  | 46340177  | 46365152  | protein_coding | 5,37 | 0 |
| ENSG00000147852 | VLDLR      | 9  | 2621834   | 2660053   | protein_coding | 5,37 | 0 |
| ENSG00000270011 | ZNF559-ZNF | 19 | 9324174   | 9382617   | protein_coding | 5,36 | 0 |
| ENSG00000048707 | VPS13D     | 1  | 12230067  | 12512047  | protein_coding | 5,36 | 0 |
| ENSG00000141524 | TMC6       | 17 | 78110458  | 78132407  | protein_coding | 5,36 | 0 |
| ENSG00000182952 | HMGNA4     | 6  | 26538405  | 26546254  | protein_coding | 5,36 | 0 |
| ENSG00000110693 | SOX6       | 11 | 15966449  | 16739591  | protein_coding | 5,36 | 0 |
| ENSG00000156052 | GNAQ       | 9  | 77716087  | 78031458  | protein_coding | 5,36 | 0 |
| ENSG00000132600 | PRMT7      | 16 | 68310974  | 68358563  | protein_coding | 5,36 | 0 |
| ENSG00000113645 | WWC1       | 5  | 168291651 | 168472303 | protein_coding | 5,35 | 0 |
| ENSG00000163041 | H3F3A      | 1  | 226061851 | 226072001 | protein_coding | 5,35 | 0 |
| ENSG00000022976 | ZNF839     | 14 | 102317377 | 102342702 | protein_coding | 5,35 | 0 |
| ENSG00000131724 | IL13RA1    | X  | 118727572 | 118794539 | protein_coding | 5,35 | 0 |
| ENSG00000130958 | SLC35D2    | 9  | 96320706  | 96383710  | protein_coding | 5,35 | 0 |
| ENSG00000196177 | ACADSB     | 10 | 123008979 | 123058311 | protein_coding | 5,35 | 0 |
| ENSG00000187699 | C2orf88    | 2  | 189879609 | 190203484 | protein_coding | 5,34 | 0 |
| ENSG00000134291 | TMEM106C   | 12 | 47963569  | 47968878  | protein_coding | 5,34 | 0 |
| ENSG00000161277 | THAP8      | 19 | 36034985  | 36054762  | protein_coding | 5,33 | 0 |
| ENSG00000211584 | SLC48A1    | 12 | 47753916  | 47782753  | protein_coding | 5,33 | 0 |
| ENSG00000110723 | EXPH5      | 11 | 108505431 | 108593738 | protein_coding | 5,33 | 0 |
| ENSG00000196821 | C6orf106   | 6  | 34587288  | 34696859  | protein_coding | 5,33 | 0 |
| ENSG00000129472 | RAB2B      | 14 | 21459020  | 21476973  | protein_coding | 5,33 | 0 |
| ENSG00000136710 | CCDC115    | 2  | 130338241 | 130342349 | protein_coding | 5,33 | 0 |
| ENSG00000107581 | EIF3A      | 10 | 119033670 | 119080823 | protein_coding | 5,33 | 0 |
| ENSG00000111880 | RNGTT      | 6  | 88610272  | 88963721  | protein_coding | 5,32 | 0 |
| ENSG00000113407 | TARS       | 5  | 33440696  | 33469539  | protein_coding | 5,32 | 0 |
| ENSG00000177479 | ARIH2      | 3  | 48918821  | 48986382  | protein_coding | 5,32 | 0 |
| ENSG00000101843 | PSMD10     | X  | 108084207 | 108091618 | protein_coding | 5,31 | 0 |
| ENSG00000128607 | KLHDC10    | 7  | 130070510 | 130135720 | protein_coding | 5,31 | 0 |
| ENSG00000152127 | MGAT5      | 2  | 134119983 | 134454621 | protein_coding | 5,31 | 0 |
| ENSG00000145882 | PCYOX1L    | 5  | 149358007 | 149369653 | protein_coding | 5,31 | 0 |
| ENSG00000181666 | HKR1       | 19 | 37312837  | 37369365  | protein_coding | 5,30 | 0 |
| ENSG00000196562 | SULF2      | 20 | 47656348  | 47786616  | protein_coding | 5,30 | 0 |
| ENSG00000110777 | POU2AF1    | 11 | 111352252 | 111455630 | protein_coding | 5,30 | 0 |
| ENSG00000205238 | SPDYE2     | 7  | 102551232 | 102562308 | protein_coding | 5,30 | 0 |
| ENSG00000151967 | SCHIP1     | 3  | 159839861 | 159897360 | protein_coding | 5,30 | 0 |
| ENSG00000051382 | PIK3CB     | 3  | 138652699 | 138834938 | protein_coding | 5,30 | 0 |
| ENSG00000188938 | FAM120AOS  | 9  | 93446494  | 93453592  | protein_coding | 5,30 | 0 |

|                 |            |    |           |           |                |      |   |
|-----------------|------------|----|-----------|-----------|----------------|------|---|
| ENSG00000163728 | TTC14      | 3  | 180602130 | 180617828 | protein_coding | 5,30 | 0 |
| ENSG00000118922 | KLF12      | 13 | 73686089  | 74133905  | protein_coding | 5,29 | 0 |
| ENSG00000068394 | GPKOW      | X  | 49113389  | 49123801  | protein_coding | 5,29 | 0 |
| ENSG00000126804 | ZBTB1      | 14 | 64503712  | 64533690  | protein_coding | 5,29 | 0 |
| ENSG00000103199 | ZNF500     | 16 | 4748239   | 4767624   | protein_coding | 5,29 | 0 |
| ENSG00000229676 | ZNF492     | 19 | 22634324  | 22667670  | protein_coding | 5,29 | 0 |
| ENSG00000261884 | ENSG000002 | 16 | 67929614  | 67936017  | protein_coding | 5,29 | 0 |
| ENSG00000162601 | MYSM1      | 1  | 58654739  | 58700092  | protein_coding | 5,27 | 0 |
| ENSG00000198018 | ENTPD7     | 10 | 99659506  | 99706240  | protein_coding | 5,27 | 0 |
| ENSG00000165406 | 08-mars    | 10 | 45454585  | 45594906  | protein_coding | 5,27 | 0 |
| ENSG00000112511 | PHF1       | 6  | 33410399  | 33416453  | protein_coding | 5,27 | 0 |
| ENSG00000130340 | SNX9       | 6  | 157700387 | 157945077 | protein_coding | 5,26 | 0 |
| ENSG00000187260 | WDR86      | 7  | 151375909 | 151410727 | protein_coding | 5,26 | 0 |
| ENSG00000113441 | LNPEP      | 5  | 96935394  | 97037515  | protein_coding | 5,26 | 0 |
| ENSG00000115207 | GTF3C2     | 2  | 27325849  | 27357034  | protein_coding | 5,26 | 0 |
| ENSG00000078328 | RBFOX1     | 16 | 6019094   | 7713338   | protein_coding | 5,26 | 0 |
| ENSG00000163517 | HDAC11     | 3  | 13479724  | 13506424  | protein_coding | 5,25 | 0 |
| ENSG00000145495 | 06-mars    | 5  | 10353703  | 10440388  | protein_coding | 5,25 | 0 |
| ENSG00000166295 | ANAPC16    | 10 | 72216000  | 72235860  | protein_coding | 5,25 | 0 |
| ENSG00000071127 | WDR1       | 4  | 10074339  | 10116949  | protein_coding | 5,25 | 0 |
| ENSG00000108592 | FTSJ3      | 17 | 63819433  | 63830012  | protein_coding | 5,24 | 0 |
| ENSG00000072062 | PRKACA     | 19 | 14091688  | 14118084  | protein_coding | 5,24 | 0 |
| ENSG00000109079 | TNFAIP1    | 17 | 28335602  | 28347009  | protein_coding | 5,24 | 0 |
| ENSG00000155463 | OXA1L      | 14 | 22766522  | 22773041  | protein_coding | 5,23 | 0 |
| ENSG00000119004 | CYP20A1    | 2  | 203238449 | 203305840 | protein_coding | 5,23 | 0 |
| ENSG00000198363 | ASPH       | 8  | 61500556  | 61714640  | protein_coding | 5,23 | 0 |
| ENSG00000094841 | UPRT       | X  | 75274085  | 75304600  | protein_coding | 5,22 | 0 |
| ENSG00000149657 | LSM14B     | 20 | 62122461  | 62135378  | protein_coding | 5,21 | 0 |
| ENSG00000081177 | EXD2       | 14 | 69191511  | 69244020  | protein_coding | 5,21 | 0 |
| ENSG00000117620 | SLC35A3    | 1  | 99969789  | 100026979 | protein_coding | 5,21 | 0 |
| ENSG00000113712 | CSNK1A1    | 5  | 149492197 | 149551552 | protein_coding | 5,21 | 0 |
| ENSG00000182568 | SATB1      | 3  | 18345387  | 18445588  | protein_coding | 5,21 | 0 |
| ENSG00000122042 | UBL3       | 13 | 29764371  | 29850684  | protein_coding | 5,20 | 0 |
| ENSG00000183889 | ENSG000002 | 16 | 16317444  | 16350590  | protein_coding | 5,20 | 0 |
| ENSG00000198848 | CES1       | 16 | 55802851  | 55833337  | protein_coding | 5,20 | 0 |
| ENSG00000280273 | ENSG000002 | 8  | 11283500  | 11285068  | protein_coding | 5,20 | 0 |
| ENSG00000262621 | ENSG000002 | 16 | 3365099   | 3479550   | protein_coding | 5,20 | 0 |
| ENSG00000151779 | NBAS       | 2  | 15166909  | 15561330  | protein_coding | 5,20 | 0 |
| ENSG00000130147 | SH3BP4     | 2  | 234951973 | 235055714 | protein_coding | 5,20 | 0 |
| ENSG00000169184 | MN1        | 22 | 27748277  | 27801498  | protein_coding | 5,20 | 0 |
| ENSG00000078902 | TOLLIP     | 11 | 1274371   | 1309654   | protein_coding | 5,20 | 0 |
| ENSG00000166224 | SGPL1      | 10 | 70815961  | 70881173  | protein_coding | 5,19 | 0 |
| ENSG00000123268 | ATF1       | 12 | 50763710  | 50821122  | protein_coding | 5,18 | 0 |
| ENSG00000156958 | GALK2      | 15 | 49155656  | 49367869  | protein_coding | 5,18 | 0 |
| ENSG00000204186 | ZDBF2      | 2  | 206274663 | 206314428 | protein_coding | 5,17 | 0 |
| ENSG00000137200 | CMTR1      | 6  | 37433219  | 37482827  | protein_coding | 5,17 | 0 |
| ENSG00000138069 | RAB1A      | 2  | 65070701  | 65130106  | protein_coding | 5,17 | 0 |
| ENSG00000250317 | SMIM20     | 4  | 25861830  | 25929874  | protein_coding | 5,17 | 0 |
| ENSG00000264522 | OTUD7B     | 1  | 149937812 | 150010676 | protein_coding | 5,17 | 0 |
| ENSG00000183579 | ZNRF3      | 22 | 28883592  | 29057487  | protein_coding | 5,16 | 0 |
| ENSG00000178988 | MRFAP1L1   | 4  | 6707701   | 6709880   | protein_coding | 5,16 | 0 |
| ENSG00000115816 | CEBPZ      | 2  | 37201612  | 37231713  | protein_coding | 5,16 | 0 |
| ENSG00000120742 | SERP1      | 3  | 150541994 | 150603228 | protein_coding | 5,16 | 0 |
| ENSG00000103647 | CORO2B     | 15 | 68578969  | 68727806  | protein_coding | 5,16 | 0 |
| ENSG00000083223 | ZCCHC6     | 9  | 86287733  | 86354454  | protein_coding | 5,16 | 0 |
| ENSG00000065308 | TRAM2      | 6  | 52497402  | 52576915  | protein_coding | 5,16 | 0 |
| ENSG00000184517 | ZFP1       | 16 | 75148492  | 75172236  | protein_coding | 5,15 | 0 |
| ENSG00000167770 | OTUB1      | 11 | 63985853  | 64001811  | protein_coding | 5,15 | 0 |



|                 |            |    |           |           |                |      |   |
|-----------------|------------|----|-----------|-----------|----------------|------|---|
| ENSG00000107554 | DNMBP      | 10 | 99875577  | 100009919 | protein_coding | 5,15 | 0 |
| ENSG00000197372 | ZNF675     | 19 | 23525631  | 23687220  | protein_coding | 5,15 | 0 |
| ENSG00000008853 | RHOBTB2    | 8  | 22987417  | 23020199  | protein_coding | 5,14 | 0 |
| ENSG00000127311 | HELB       | 12 | 66302545  | 66347645  | protein_coding | 5,14 | 0 |
| ENSG00000109501 | WFS1       | 4  | 6269849   | 6303265   | protein_coding | 5,14 | 0 |
| ENSG00000166359 | WDR88      | 19 | 33132090  | 33175795  | protein_coding | 5,14 | 0 |
| ENSG00000159433 | STARD9     | 15 | 42575659  | 42720981  | protein_coding | 5,14 | 0 |
| ENSG00000078124 | ACER3      | 11 | 76860867  | 77026797  | protein_coding | 5,14 | 0 |
| ENSG00000131508 | UBE2D2     | 5  | 139526431 | 139628433 | protein_coding | 5,13 | 0 |
| ENSG00000090060 | PAPOLA     | 14 | 96501433  | 96567111  | protein_coding | 5,13 | 0 |
| ENSG00000165914 | TTC7B      | 14 | 90524564  | 90816479  | protein_coding | 5,13 | 0 |
| ENSG00000164051 | CCDC51     | 3  | 48432164  | 48440456  | protein_coding | 5,12 | 0 |
| ENSG00000090054 | SPTLC1     | 9  | 92031999  | 92115384  | protein_coding | 5,11 | 0 |
| ENSG00000166471 | TMEM41B    | 11 | 9280654   | 9314780   | protein_coding | 5,10 | 0 |
| ENSG00000171631 | P2RY6      | 11 | 73264505  | 73298617  | protein_coding | 5,10 | 0 |
| ENSG00000214688 | C10orf105  | 10 | 71711701  | 71737824  | protein_coding | 5,10 | 0 |
| ENSG00000146802 | TMEM168    | 7  | 112762382 | 112790592 | protein_coding | 5,10 | 0 |
| ENSG00000119906 | SLF2       | 10 | 100912569 | 100965136 | protein_coding | 5,09 | 0 |
| ENSG00000037474 | NSUN2      | 5  | 6599239   | 6633291   | protein_coding | 5,09 | 0 |
| ENSG00000129315 | CCNT1      | 12 | 48688458  | 48716998  | protein_coding | 5,09 | 0 |
| ENSG00000106524 | ANKMY2     | 7  | 16599776  | 16645817  | protein_coding | 5,09 | 0 |
| ENSG00000150457 | LATS2      | 13 | 20973032  | 21061547  | protein_coding | 5,08 | 0 |
| ENSG00000101350 | KIF3B      | 20 | 32277664  | 32335011  | protein_coding | 5,08 | 0 |
| ENSG00000108187 | PBLD       | 10 | 68282660  | 68333049  | protein_coding | 5,08 | 0 |
| ENSG00000001497 | LAS1L      | X  | 65512582  | 65534775  | protein_coding | 5,08 | 0 |
| ENSG00000204604 | ZNF468     | 19 | 52838008  | 52857649  | protein_coding | 5,07 | 0 |
| ENSG00000040933 | INPP4A     | 2  | 98444854  | 98594390  | protein_coding | 5,07 | 0 |
| ENSG00000137364 | TPMT       | 6  | 18128311  | 18155074  | protein_coding | 5,07 | 0 |
| ENSG00000134748 | PRPF38A    | 1  | 52404564  | 52420839  | protein_coding | 5,07 | 0 |
| ENSG00000088038 | CNOT3      | 19 | 54137728  | 54155681  | protein_coding | 5,06 | 0 |
| ENSG00000107960 | OBFC1      | 10 | 103882542 | 103918205 | protein_coding | 5,05 | 0 |
| ENSG00000140740 | UQCRC2     | 16 | 21952660  | 21983660  | protein_coding | 5,04 | 0 |
| ENSG00000182180 | MRPS16     | 10 | 73248843  | 73252693  | protein_coding | 5,04 | 0 |
| ENSG00000132256 | TRIM5      | 11 | 5663557   | 5938619   | protein_coding | 5,04 | 0 |
| ENSG00000112033 | PPARD      | 6  | 35342558  | 35428191  | protein_coding | 5,04 | 0 |
| ENSG00000005436 | GCFC2      | 2  | 75652000  | 75710989  | protein_coding | 5,04 | 0 |
| ENSG00000147130 | ZMYM3      | X  | 71239624  | 71255146  | protein_coding | 5,03 | 0 |
| ENSG00000156642 | NPTN       | 15 | 73560014  | 73634134  | protein_coding | 5,03 | 0 |
| ENSG00000136436 | CALCOCO2   | 17 | 48830988  | 48866522  | protein_coding | 5,02 | 0 |
| ENSG00000204406 | MBD5       | 2  | 148021011 | 148516971 | protein_coding | 5,02 | 0 |
| ENSG00000138081 | FBXO11     | 2  | 47789316  | 47905793  | protein_coding | 5,02 | 0 |
| ENSG00000187609 | EXD3       | 9  | 137306896 | 137423262 | protein_coding | 5,02 | 0 |
| ENSG00000144580 | RQCD1      | 2  | 218568580 | 218597080 | protein_coding | 5,01 | 0 |
| ENSG00000153147 | SMARCA5    | 4  | 143513463 | 143557486 | protein_coding | 5,01 | 0 |
| ENSG00000101166 | PRELID3B   | 20 | 59033145  | 59042909  | protein_coding | 5,01 | 0 |
| ENSG00000137145 | DENND4C    | 9  | 19230435  | 19373545  | protein_coding | 5,01 | 0 |
| ENSG00000135372 | NAT10      | 11 | 34105602  | 34147670  | protein_coding | 5,01 | 0 |
| ENSG00000084112 | SSH1       | 12 | 108778192 | 108857590 | protein_coding | 5,00 | 0 |
| ENSG00000068308 | OTUD5      | X  | 48922028  | 48958386  | protein_coding | 5,00 | 0 |
| ENSG00000158941 | CCAR2      | 8  | 22604632  | 22621514  | protein_coding | 5,00 | 0 |
| ENSG00000008735 | MAPK8IP2   | 22 | 50600685  | 50613981  | protein_coding | 5,00 | 0 |
| ENSG00000196689 | TRPV1      | 17 | 3565444   | 3609411   | protein_coding | 5,00 | 0 |
| ENSG00000160539 | PLPP7      | 9  | 131289694 | 131309262 | protein_coding | 5,00 | 0 |
| ENSG00000204385 | SLC44A4    | 6  | 31863192  | 31879046  | protein_coding | 5,00 | 0 |
| ENSG00000280987 | ENSG000002 | 5  | 139273752 | 139331677 | protein_coding | 5,00 | 0 |
| ENSG00000162543 | UBXN10     | 1  | 20186085  | 20196048  | protein_coding | 5,00 | 0 |
| ENSG00000188895 | MSL1       | 17 | 40122298  | 40136916  | protein_coding | 5,00 | 0 |
| ENSG00000104660 | LEPROTL1   | 8  | 30095398  | 30177208  | protein_coding | 4,99 | 0 |

|                 |            |    |           |           |                |      |   |
|-----------------|------------|----|-----------|-----------|----------------|------|---|
| ENSG00000114770 | ABCC5      | 3  | 183919934 | 184018015 | protein_coding | 4,99 | 0 |
| ENSG00000119203 | CPSF3      | 2  | 9423568   | 9473101   | protein_coding | 4,99 | 0 |
| ENSG00000111725 | PRKAB1     | 12 | 119667753 | 119681630 | protein_coding | 4,99 | 0 |
| ENSG00000154845 | PPP4R1     | 18 | 9546791   | 9615240   | protein_coding | 4,98 | 0 |
| ENSG00000095370 | SH2D3C     | 9  | 127738317 | 127778741 | protein_coding | 4,98 | 0 |
| ENSG00000275052 | PPP4R3B    | 2  | 55547292  | 55618880  | protein_coding | 4,96 | 0 |
| ENSG00000106682 | EIF4H      | 7  | 74174245  | 74197101  | protein_coding | 4,96 | 0 |
| ENSG00000196743 | GM2A       | 5  | 151212150 | 151270440 | protein_coding | 4,95 | 0 |
| ENSG00000073417 | PDE8A      | 15 | 84980440  | 85139145  | protein_coding | 4,95 | 0 |
| ENSG00000168813 | ZNF507     | 19 | 32345594  | 32387667  | protein_coding | 4,95 | 0 |
| ENSG00000204634 | TBC1D8     | 2  | 101007617 | 101252866 | protein_coding | 4,95 | 0 |
| ENSG00000167261 | DPEP2      | 16 | 67987394  | 68000586  | protein_coding | 4,94 | 0 |
| ENSG00000090316 | MAEA       | 4  | 1289851   | 1340147   | protein_coding | 4,94 | 0 |
| ENSG00000131788 | PIAS3      | 1  | 145848522 | 145859836 | protein_coding | 4,94 | 0 |
| ENSG00000276045 | ORAI1      | 12 | 121626550 | 121642677 | protein_coding | 4,93 | 0 |
| ENSG00000036549 | ZZZ3       | 1  | 77562416  | 77683419  | protein_coding | 4,93 | 0 |
| ENSG00000168488 | ATXN2L     | 16 | 28823035  | 28837237  | protein_coding | 4,93 | 0 |
| ENSG00000100380 | ST13       | 22 | 40824535  | 40857022  | protein_coding | 4,93 | 0 |
| ENSG00000171490 | RSL1D1     | 16 | 11833850  | 11851585  | protein_coding | 4,93 | 0 |
| ENSG00000197362 | ZNF786     | 7  | 149069643 | 149090782 | protein_coding | 4,93 | 0 |
| ENSG00000180198 | RCC1       | 1  | 28505943  | 28539300  | protein_coding | 4,93 | 0 |
| ENSG00000136932 | TRMO       | 9  | 97904489  | 97922570  | protein_coding | 4,93 | 0 |
| ENSG00000269743 | SLC25A53   | X  | 104099214 | 104157027 | protein_coding | 4,92 | 0 |
| ENSG00000204856 | FAM216A    | 12 | 110468364 | 110490385 | protein_coding | 4,92 | 0 |
| ENSG00000091009 | RBM27      | 5  | 146203600 | 146289132 | protein_coding | 4,92 | 0 |
| ENSG00000137819 | PAQR5      | 15 | 69298947  | 69407780  | protein_coding | 4,91 | 0 |
| ENSG00000122882 | ECD        | 10 | 73130155  | 73169055  | protein_coding | 4,90 | 0 |
| ENSG00000189362 | NEMP2      | 2  | 190504342 | 190534722 | protein_coding | 4,90 | 0 |
| ENSG00000140987 | ZSCAN32    | 16 | 3382081   | 3401065   | protein_coding | 4,90 | 0 |
| ENSG00000003249 | DBNDD1     | 16 | 90004865  | 90020128  | protein_coding | 4,90 | 0 |
| ENSG00000161542 | PRPSAP1    | 17 | 76309486  | 76384521  | protein_coding | 4,90 | 0 |
| ENSG00000141642 | ELAC1      | 18 | 50967991  | 50988121  | protein_coding | 4,89 | 0 |
| ENSG00000180008 | SOCS4      | 14 | 55027230  | 55049488  | protein_coding | 4,89 | 0 |
| ENSG00000183520 | UTP11L     | 1  | 38009258  | 38024824  | protein_coding | 4,89 | 0 |
| ENSG00000157500 | APPL1      | 3  | 57227737  | 57273468  | protein_coding | 4,89 | 0 |
| ENSG00000138688 | KIAA1109   | 4  | 122152333 | 122362758 | protein_coding | 4,88 | 0 |
| ENSG00000135245 | HILPDA     | 7  | 128455849 | 128458418 | protein_coding | 4,88 | 0 |
| ENSG00000171462 | DLK2       | 6  | 43450352  | 43456632  | protein_coding | 4,88 | 0 |
| ENSG00000134539 | KLRD1      | 12 | 10226058  | 10329600  | protein_coding | 4,88 | 0 |
| ENSG00000143155 | TIPRL      | 1  | 168178933 | 168202114 | protein_coding | 4,88 | 0 |
| ENSG00000172766 | NAA16      | 13 | 41311205  | 41377030  | protein_coding | 4,87 | 0 |
| ENSG00000109854 | HTATIP2    | 11 | 20363685  | 20383783  | protein_coding | 4,87 | 0 |
| ENSG00000107854 | TNKS2      | 10 | 91798312  | 91865276  | protein_coding | 4,87 | 0 |
| ENSG00000126351 | THRA       | 17 | 40058290  | 40093867  | protein_coding | 4,87 | 0 |
| ENSG00000170473 | PYM1       | 12 | 55901413  | 55932618  | protein_coding | 4,87 | 0 |
| ENSG00000151327 | FAM177A1   | 14 | 35044907  | 35113130  | protein_coding | 4,86 | 0 |
| ENSG00000183291 | ENSG000001 | 1  | 86862445  | 86914424  | protein_coding | 4,86 | 0 |
| ENSG00000067369 | TP53BP1    | 15 | 43403061  | 43510728  | protein_coding | 4,86 | 0 |
| ENSG00000152242 | C18orf25   | 18 | 46173553  | 46266991  | protein_coding | 4,86 | 0 |
| ENSG00000115145 | STAM2      | 2  | 152116801 | 152175992 | protein_coding | 4,86 | 0 |
| ENSG00000123600 | METTL8     | 2  | 171317405 | 171434802 | protein_coding | 4,85 | 0 |
| ENSG00000154079 | SDHAF4     | 6  | 70566917  | 70589569  | protein_coding | 4,84 | 0 |
| ENSG00000163393 | SLC22A15   | 1  | 115976498 | 116070054 | protein_coding | 4,84 | 0 |
| ENSG00000144134 | RABL2A     | 2  | 113627229 | 113643396 | protein_coding | 4,84 | 0 |
| ENSG00000137575 | SDCBP      | 8  | 58552924  | 58582860  | protein_coding | 4,84 | 0 |
| ENSG00000127666 | TICAM1     | 19 | 4815932   | 4831704   | protein_coding | 4,84 | 0 |
| ENSG00000148339 | SLC25A25   | 9  | 128068201 | 128109245 | protein_coding | 4,84 | 0 |
| ENSG00000145975 | FAM217A    | 6  | 4049434   | 4087344   | protein_coding | 4,83 | 0 |

|                 |          |    |           |           |                |      |   |
|-----------------|----------|----|-----------|-----------|----------------|------|---|
| ENSG00000129292 | PHF20L1  | 8  | 132775358 | 132848807 | protein_coding | 4,83 | 0 |
| ENSG00000177917 | ARL6IP6  | 2  | 152717893 | 152761253 | protein_coding | 4,83 | 0 |
| ENSG00000206199 | ANKUB1   | 3  | 149761105 | 149968385 | protein_coding | 4,83 | 0 |
| ENSG00000112981 | NME5     | 5  | 138115172 | 138139443 | protein_coding | 4,83 | 0 |
| ENSG00000083544 | TDRD3    | 13 | 60396457  | 60573878  | protein_coding | 4,83 | 0 |
| ENSG00000178035 | IMPDPH2  | 3  | 49024325  | 49029408  | protein_coding | 4,82 | 0 |
| ENSG00000140932 | CMTM2    | 16 | 66579448  | 66588275  | protein_coding | 4,82 | 0 |
| ENSG00000181894 | ZNF329   | 19 | 58126252  | 58155110  | protein_coding | 4,81 | 0 |
| ENSG00000149269 | PAK1     | 11 | 77321707  | 77474635  | protein_coding | 4,81 | 0 |
| ENSG00000140829 | DHX38    | 16 | 72093562  | 72112912  | protein_coding | 4,81 | 0 |
| ENSG00000112701 | SENP6    | 6  | 75601509  | 75718278  | protein_coding | 4,80 | 0 |
| ENSG00000129003 | VPS13C   | 15 | 61852389  | 62060473  | protein_coding | 4,80 | 0 |
| ENSG00000080854 | IGSF9B   | 11 | 133908564 | 133956985 | protein_coding | 4,80 | 0 |
| ENSG00000106701 | FSD1L    | 9  | 105447796 | 105552433 | protein_coding | 4,80 | 0 |
| ENSG00000101574 | METTL4   | 18 | 2537525   | 2571509   | protein_coding | 4,80 | 0 |
| ENSG00000134247 | PTGFRN   | 1  | 116910057 | 116990358 | protein_coding | 4,79 | 0 |
| ENSG00000178913 | TAF7     | 5  | 141260225 | 141320821 | protein_coding | 4,79 | 0 |
| ENSG00000090061 | CCNK     | 14 | 99481169  | 99535044  | protein_coding | 4,79 | 0 |
| ENSG00000171824 | EXOSC10  | 1  | 11066618  | 11099881  | protein_coding | 4,78 | 0 |
| ENSG00000135469 | COQ10A   | 12 | 56266858  | 56270966  | protein_coding | 4,78 | 0 |
| ENSG00000198815 | FOXJ3    | 1  | 42176539  | 42335877  | protein_coding | 4,77 | 0 |
| ENSG00000169139 | UBE2V2   | 8  | 48008400  | 48064708  | protein_coding | 4,77 | 0 |
| ENSG00000146247 | PHIP     | 6  | 78935867  | 79078236  | protein_coding | 4,77 | 0 |
| ENSG00000162869 | PPP1R21  | 2  | 48440598  | 48515391  | protein_coding | 4,77 | 0 |
| ENSG00000171469 | ZNF561   | 19 | 9604680   | 9621399   | protein_coding | 4,77 | 0 |
| ENSG00000105479 | CCDC114  | 19 | 48296457  | 48321894  | protein_coding | 4,76 | 0 |
| ENSG00000134686 | PHC2     | 1  | 33323623  | 33431052  | protein_coding | 4,76 | 0 |
| ENSG00000065000 | AP3D1    | 19 | 2100988   | 2164465   | protein_coding | 4,75 | 0 |
| ENSG00000087274 | ADD1     | 4  | 2843857   | 2930076   | protein_coding | 4,75 | 0 |
| ENSG00000225921 | NOL7     | 6  | 13615327  | 13632739  | protein_coding | 4,75 | 0 |
| ENSG00000120694 | HSPH1    | 13 | 31134974  | 31162388  | protein_coding | 4,75 | 0 |
| ENSG00000105341 | ATP5SL   | 19 | 41431318  | 41440717  | protein_coding | 4,75 | 0 |
| ENSG00000061676 | NCKAP1   | 2  | 182909115 | 183038858 | protein_coding | 4,75 | 0 |
| ENSG00000156170 | NDUFAF6  | 8  | 94895767  | 95116455  | protein_coding | 4,75 | 0 |
| ENSG00000136754 | ABI1     | 10 | 26746593  | 26861087  | protein_coding | 4,75 | 0 |
| ENSG00000179134 | SAMD4B   | 19 | 39342396  | 39385710  | protein_coding | 4,75 | 0 |
| ENSG00000116266 | STXBP3   | 1  | 108746674 | 108809526 | protein_coding | 4,75 | 0 |
| ENSG00000052841 | TTC17    | 11 | 43358932  | 43494933  | protein_coding | 4,74 | 0 |
| ENSG00000198887 | SMC5     | 9  | 70258962  | 70354888  | protein_coding | 4,74 | 0 |
| ENSG00000198160 | MIER1    | 1  | 66924895  | 66988619  | protein_coding | 4,74 | 0 |
| ENSG00000132423 | COQ3     | 6  | 99369400  | 99394204  | protein_coding | 4,74 | 0 |
| ENSG00000103740 | ACSBG1   | 15 | 78167468  | 78245688  | protein_coding | 4,73 | 0 |
| ENSG00000083168 | KAT6A    | 8  | 41929479  | 42051990  | protein_coding | 4,73 | 0 |
| ENSG00000198799 | LRIG2    | 1  | 113073209 | 113132260 | protein_coding | 4,73 | 0 |
| ENSG00000162591 | MEGF6    | 1  | 3489920   | 3611495   | protein_coding | 4,72 | 0 |
| ENSG00000162408 | NOL9     | 1  | 6521347   | 6554535   | protein_coding | 4,72 | 0 |
| ENSG00000168806 | LCMT2    | 15 | 43323649  | 43330605  | protein_coding | 4,72 | 0 |
| ENSG00000136643 | RPS6KC1  | 1  | 213051233 | 213274773 | protein_coding | 4,72 | 0 |
| ENSG00000099814 | CEP170B  | 14 | 104865280 | 104896770 | protein_coding | 4,71 | 0 |
| ENSG00000184007 | PTP4A2   | 1  | 31906421  | 31944856  | protein_coding | 4,71 | 0 |
| ENSG00000095574 | IKZF5    | 10 | 122990806 | 123008817 | protein_coding | 4,71 | 0 |
| ENSG00000129518 | EAPP     | 14 | 34515929  | 34539711  | protein_coding | 4,71 | 0 |
| ENSG00000172466 | ZNF24    | 18 | 35332212  | 35345482  | protein_coding | 4,71 | 0 |
| ENSG00000176953 | NFATC2IP | 16 | 28950807  | 28967097  | protein_coding | 4,70 | 0 |
| ENSG00000038382 | TRIO     | 5  | 14143702  | 14532128  | protein_coding | 4,70 | 0 |
| ENSG00000165669 | FAM204A  | 10 | 118297930 | 118342328 | protein_coding | 4,70 | 0 |
| ENSG00000136682 | CBWD2    | 2  | 113437691 | 113496189 | protein_coding | 4,69 | 0 |
| ENSG00000162994 | CLHC1    | 2  | 55174791  | 55232563  | protein_coding | 4,69 | 0 |

|                 |            |    |           |           |                |      |   |
|-----------------|------------|----|-----------|-----------|----------------|------|---|
| ENSG0000063046  | EIF4B      | 12 | 53006158  | 53042209  | protein_coding | 4,69 | 0 |
| ENSG0000110318  | CEP126     | 11 | 101915015 | 102001058 | protein_coding | 4,69 | 0 |
| ENSG0000063241  | ISOC2      | 19 | 55452985  | 55462343  | protein_coding | 4,69 | 0 |
| ENSG00000204852 | TCTN1      | 12 | 110614027 | 110649430 | protein_coding | 4,68 | 0 |
| ENSG00000099810 | MTAP       | 9  | 21802543  | 21937651  | protein_coding | 4,68 | 0 |
| ENSG00000169629 | RGPD8      | 2  | 112370092 | 112434488 | protein_coding | 4,68 | 0 |
| ENSG00000079387 | SENP1      | 12 | 48042898  | 48106308  | protein_coding | 4,68 | 0 |
| ENSG00000101266 | CSNK2A1    | 20 | 473591    | 543821    | protein_coding | 4,67 | 0 |
| ENSG00000185630 | PBX1       | 1  | 164555584 | 164899296 | protein_coding | 4,67 | 0 |
| ENSG00000170464 | DNAJC18    | 5  | 139408588 | 139444491 | protein_coding | 4,67 | 0 |
| ENSG00000138942 | RNF185     | 22 | 31160183  | 31207019  | protein_coding | 4,67 | 0 |
| ENSG00000142039 | CCDC97     | 19 | 41310189  | 41324883  | protein_coding | 4,67 | 0 |
| ENSG00000183688 | FAM101B    | 17 | 439978    | 445939    | protein_coding | 4,66 | 0 |
| ENSG00000130764 | LRRC47     | 1  | 3778558   | 3796504   | protein_coding | 4,66 | 0 |
| ENSG00000188917 | TRMT2B     | X  | 101009346 | 101052116 | protein_coding | 4,66 | 0 |
| ENSG00000135047 | CTSL       | 9  | 87725519  | 87731393  | protein_coding | 4,65 | 0 |
| ENSG00000121964 | GTDC1      | 2  | 143938068 | 144332568 | protein_coding | 4,65 | 0 |
| ENSG00000067365 | METTL22    | 16 | 8621683   | 8649654   | protein_coding | 4,65 | 0 |
| ENSG00000160299 | PCNT       | 21 | 46324122  | 46445769  | protein_coding | 4,64 | 0 |
| ENSG00000110583 | NAA40      | 11 | 63938959  | 63957328  | protein_coding | 4,64 | 0 |
| ENSG00000221923 | ZNF880     | 19 | 52369917  | 52385795  | protein_coding | 4,64 | 0 |
| ENSG00000173614 | NMNAT1     | 1  | 9943428   | 9985501   | protein_coding | 4,64 | 0 |
| ENSG00000089737 | DDX24      | 14 | 94048291  | 94081245  | protein_coding | 4,64 | 0 |
| ENSG00000274523 | WBSCR16    | 7  | 75027122  | 75074228  | protein_coding | 4,63 | 0 |
| ENSG00000065491 | TBC1D22B   | 6  | 37257772  | 37332970  | protein_coding | 4,63 | 0 |
| ENSG00000116701 | NCF2       | 1  | 183555563 | 183590876 | protein_coding | 4,62 | 0 |
| ENSG00000149136 | SSRP1      | 11 | 57325985  | 57335877  | protein_coding | 4,62 | 0 |
| ENSG00000166225 | FRS2       | 12 | 69470349  | 69579789  | protein_coding | 4,61 | 0 |
| ENSG00000171940 | ZNF217     | 20 | 53567065  | 53609907  | protein_coding | 4,61 | 0 |
| ENSG00000173451 | THAP2      | 12 | 71663009  | 71680639  | protein_coding | 4,61 | 0 |
| ENSG00000179988 | PSTK       | 10 | 122954381 | 122997513 | protein_coding | 4,61 | 0 |
| ENSG00000055332 | EIF2AK2    | 2  | 37099210  | 37157065  | protein_coding | 4,61 | 0 |
| ENSG00000179195 | ZNF664     | 12 | 123971845 | 124015439 | protein_coding | 4,60 | 0 |
| ENSG00000159958 | TNFRSF13C  | 22 | 41922023  | 41926818  | protein_coding | 4,60 | 0 |
| ENSG00000277224 | HIST1H2BF  | 6  | 26199520  | 26200715  | protein_coding | 4,60 | 0 |
| ENSG00000279386 | ENSG000002 | 4  | 37866561  | 37867091  | protein_coding | 4,60 | 0 |
| ENSG00000123843 | C4BPB      | 1  | 207088842 | 207099993 | protein_coding | 4,60 | 0 |
| ENSG00000197548 | ATG7       | 3  | 11272309  | 11557665  | protein_coding | 4,60 | 0 |
| ENSG00000010404 | IDS        | X  | 149476990 | 149521096 | protein_coding | 4,59 | 0 |
| ENSG00000154645 | CHODL      | 21 | 17901263  | 18267373  | protein_coding | 4,59 | 0 |
| ENSG00000221883 | ARIH2OS    | 3  | 48917788  | 48919385  | protein_coding | 4,59 | 0 |
| ENSG00000184226 | PCDH9      | 13 | 66302834  | 67230445  | protein_coding | 4,58 | 0 |
| ENSG00000081307 | UBA5       | 3  | 132654446 | 132678097 | protein_coding | 4,58 | 0 |
| ENSG00000157426 | AASDH      | 4  | 56338287  | 56387508  | protein_coding | 4,58 | 0 |
| ENSG00000047056 | WDR37      | 10 | 1049538   | 1132297   | protein_coding | 4,57 | 0 |
| ENSG00000125037 | EMC3       | 3  | 9962537   | 10011116  | protein_coding | 4,57 | 0 |
| ENSG00000109466 | KLHL2      | 4  | 165207618 | 165323156 | protein_coding | 4,56 | 0 |
| ENSG00000247746 | USP51      | X  | 55484616  | 55489202  | protein_coding | 4,56 | 0 |
| ENSG00000079974 | RABL2B     | 22 | 50767501  | 50783663  | protein_coding | 4,56 | 0 |
| ENSG00000171148 | TADA3      | 3  | 9779860   | 9793011   | protein_coding | 4,56 | 0 |
| ENSG00000182628 | SKA2       | 17 | 59109951  | 59155269  | protein_coding | 4,55 | 0 |
| ENSG00000280178 | ENSG000002 | 22 | 23782283  | 23783958  | protein_coding | 4,55 | 0 |
| ENSG00000215301 | DDX3X      | X  | 41333348  | 41364472  | protein_coding | 4,54 | 0 |
| ENSG00000176834 | VSIG10     | 12 | 118063593 | 118136026 | protein_coding | 4,54 | 0 |
| ENSG00000074695 | LMAN1      | 18 | 59327823  | 59359962  | protein_coding | 4,54 | 0 |
| ENSG00000011451 | WIZ        | 19 | 15419980  | 15449951  | protein_coding | 4,54 | 0 |
| ENSG00000115484 | CCT4       | 2  | 61868089  | 61888804  | protein_coding | 4,54 | 0 |
| ENSG00000143653 | SCCPDH     | 1  | 246724047 | 246768137 | protein_coding | 4,53 | 0 |

|                 |           |    |           |           |                |      |   |
|-----------------|-----------|----|-----------|-----------|----------------|------|---|
| ENSG00000103342 | GSPT1     | 16 | 11868128  | 11916082  | protein_coding | 4,53 | 0 |
| ENSG00000197302 | ZNF720    | 16 | 31713229  | 31794869  | protein_coding | 4,53 | 0 |
| ENSG00000184988 | TMEM106A  | 17 | 43211835  | 43220041  | protein_coding | 4,52 | 0 |
| ENSG00000164659 | KIAA1324L | 7  | 86876906  | 87059699  | protein_coding | 4,52 | 0 |
| ENSG00000146842 | TMEM209   | 7  | 130164715 | 130207770 | protein_coding | 4,52 | 0 |
| ENSG00000107758 | PPP3CB    | 10 | 73436428  | 73496024  | protein_coding | 4,52 | 0 |
| ENSG00000119685 | TLL5      | 14 | 75633625  | 75955078  | protein_coding | 4,51 | 0 |
| ENSG00000144747 | TMF1      | 3  | 69019827  | 69052303  | protein_coding | 4,51 | 0 |
| ENSG00000164938 | TP53INP1  | 8  | 94925972  | 94949411  | protein_coding | 4,51 | 0 |
| ENSG00000151413 | NUBPL     | 14 | 31489956  | 31861224  | protein_coding | 4,51 | 0 |
| ENSG00000104231 | ZFAND1    | 8  | 81701334  | 81732903  | protein_coding | 4,51 | 0 |
| ENSG00000136930 | PSMB7     | 9  | 124353466 | 124415444 | protein_coding | 4,51 | 0 |
| ENSG00000174799 | CEP135    | 4  | 55948871  | 56033363  | protein_coding | 4,50 | 0 |
| ENSG00000131023 | LATS1     | 6  | 149658153 | 149718256 | protein_coding | 4,50 | 0 |
| ENSG00000111412 | C12orf49  | 12 | 116710185 | 116738070 | protein_coding | 4,50 | 0 |
| ENSG00000117472 | TSPAN1    | 1  | 46175073  | 46185958  | protein_coding | 4,50 | 0 |
| ENSG00000158623 | COPG2     | 7  | 130506238 | 130668748 | protein_coding | 4,49 | 0 |
| ENSG00000145911 | N4BP3     | 5  | 178113443 | 178126087 | protein_coding | 4,49 | 0 |
| ENSG00000066427 | ATXN3     | 14 | 92038652  | 92106621  | protein_coding | 4,49 | 0 |
| ENSG00000161011 | SQSTM1    | 5  | 179806398 | 179838078 | protein_coding | 4,49 | 0 |
| ENSG00000122970 | IFT81     | 12 | 110124335 | 110218797 | protein_coding | 4,48 | 0 |
| ENSG0000013016  | EHD3      | 2  | 31234337  | 31269447  | protein_coding | 4,48 | 0 |
| ENSG00000131368 | MRPS25    | 3  | 15042460  | 15065335  | protein_coding | 4,48 | 0 |
| ENSG00000182985 | CADM1     | 11 | 115169218 | 115504957 | protein_coding | 4,48 | 0 |
| ENSG00000140006 | WDR89     | 14 | 63597039  | 63641861  | protein_coding | 4,48 | 0 |
| ENSG00000124787 | RPP40     | 6  | 4994732   | 5004063   | protein_coding | 4,48 | 0 |
| ENSG00000109572 | CLCN3     | 4  | 169612633 | 169723673 | protein_coding | 4,47 | 0 |
| ENSG00000106799 | TGFBR1    | 9  | 99104038  | 99154192  | protein_coding | 4,47 | 0 |
| ENSG00000073584 | SMARCE1   | 17 | 40624962  | 40648508  | protein_coding | 4,47 | 0 |
| ENSG00000147324 | MFHAS1    | 8  | 8783354   | 8893645   | protein_coding | 4,46 | 0 |
| ENSG00000164366 | CCDC127   | 5  | 196871    | 218215    | protein_coding | 4,46 | 0 |
| ENSG00000166938 | DIS3L     | 15 | 66293217  | 66333898  | protein_coding | 4,45 | 0 |
| ENSG00000169490 | TM2D2     | 8  | 38988808  | 38996824  | protein_coding | 4,45 | 0 |
| ENSG00000090273 | NUDC      | 1  | 26900238  | 26946862  | protein_coding | 4,45 | 0 |
| ENSG00000082258 | CCNT2     | 2  | 134918235 | 134959342 | protein_coding | 4,45 | 0 |
| ENSG00000138764 | CCNG2     | 4  | 77157151  | 77433388  | protein_coding | 4,45 | 0 |
| ENSG00000107290 | SETX      | 9  | 132261356 | 132354985 | protein_coding | 4,45 | 0 |
| ENSG00000146282 | RARS2     | 6  | 87514378  | 87590003  | protein_coding | 4,45 | 0 |
| ENSG00000108219 | TSPAN14   | 10 | 80454166  | 80533123  | protein_coding | 4,44 | 0 |
| ENSG00000175283 | DOLK      | 9  | 128945530 | 128947619 | protein_coding | 4,44 | 0 |
| ENSG00000168067 | MAP4K2    | 11 | 64784914  | 64803241  | protein_coding | 4,44 | 0 |
| ENSG00000166508 | MCM7      | 7  | 100092728 | 100101940 | protein_coding | 4,44 | 0 |
| ENSG00000125863 | MKKS      | 20 | 10401009  | 10434222  | protein_coding | 4,44 | 0 |
| ENSG00000165997 | ARL5B     | 10 | 18659405  | 18681639  | protein_coding | 4,44 | 0 |
| ENSG00000140848 | CPNE2     | 16 | 57092537  | 57148367  | protein_coding | 4,44 | 0 |
| ENSG00000215126 | CBWD7     | 9  | 41131306  | 41199261  | protein_coding | 4,43 | 0 |
| ENSG00000150337 | FCGR1A    | 1  | 149782671 | 149792518 | protein_coding | 4,43 | 0 |
| ENSG00000112290 | WASF1     | 6  | 110099819 | 110180004 | protein_coding | 4,42 | 0 |
| ENSG00000133466 | C1QTNF6   | 22 | 37180167  | 37199385  | protein_coding | 4,41 | 0 |
| ENSG00000064490 | RFXANK    | 19 | 19192229  | 19201869  | protein_coding | 4,41 | 0 |
| ENSG00000163635 | ATXN7     | 3  | 63864557  | 64003462  | protein_coding | 4,41 | 0 |
| ENSG00000120915 | EPHX2     | 8  | 27490779  | 27545564  | protein_coding | 4,41 | 0 |
| ENSG00000119121 | TRPM6     | 9  | 74722495  | 74888094  | protein_coding | 4,40 | 0 |
| ENSG00000198785 | GRIN3A    | 9  | 101569353 | 101738580 | protein_coding | 4,40 | 0 |
| ENSG00000198523 | PLN       | 6  | 118548298 | 118560730 | protein_coding | 4,40 | 0 |
| ENSG00000183513 | COA5      | 2  | 98599310  | 98608515  | protein_coding | 4,40 | 0 |
| ENSG00000102786 | INTS6     | 13 | 51354077  | 51454264  | protein_coding | 4,40 | 0 |
| ENSG00000168646 | AXIN2     | 17 | 65528563  | 65561647  | protein_coding | 4,39 | 0 |

|                 |            |    |           |           |                |      |   |
|-----------------|------------|----|-----------|-----------|----------------|------|---|
| ENSG00000185252 | ZNF74      | 22 | 20394115  | 20408461  | protein_coding | 4,39 | 0 |
| ENSG00000133103 | COG6       | 13 | 39655627  | 39791665  | protein_coding | 4,39 | 0 |
| ENSG00000170385 | SLC30A1    | 1  | 211571568 | 211578742 | protein_coding | 4,39 | 0 |
| ENSG00000124635 | HIST1H2BJ  | 6  | 27125897  | 27132750  | protein_coding | 4,39 | 0 |
| ENSG00000187068 | C3orf70    | 3  | 185078050 | 185153014 | protein_coding | 4,38 | 0 |
| ENSG00000143337 | TOR1AIP1   | 1  | 179882042 | 179925000 | protein_coding | 4,38 | 0 |
| ENSG00000131127 | ZNF141     | 4  | 337814    | 384864    | protein_coding | 4,38 | 0 |
| ENSG00000164011 | ZNF691     | 1  | 42846573  | 42852477  | protein_coding | 4,37 | 0 |
| ENSG00000171488 | LRRC8C     | 1  | 89633072  | 89769903  | protein_coding | 4,37 | 0 |
| ENSG00000140157 | NIPA2      | 15 | 22838641  | 22868384  | protein_coding | 4,36 | 0 |
| ENSG00000102362 | SYTL4      | X  | 100674491 | 100732123 | protein_coding | 4,36 | 0 |
| ENSG00000141076 | CIRH1A     | 16 | 69131291  | 69231130  | protein_coding | 4,35 | 0 |
| ENSG0000010244  | ZNF207     | 17 | 32350117  | 32381886  | protein_coding | 4,35 | 0 |
| ENSG00000213639 | PPP1CB     | 2  | 28751640  | 28802940  | protein_coding | 4,35 | 0 |
| ENSG00000104419 | NDRG1      | 8  | 133237171 | 133302022 | protein_coding | 4,35 | 0 |
| ENSG00000238083 | LRRC37A2   | 17 | 46511511  | 46555650  | protein_coding | 4,34 | 0 |
| ENSG00000125814 | NAPB       | 20 | 23374519  | 23421519  | protein_coding | 4,34 | 0 |
| ENSG00000213625 | LEPROT     | 1  | 65420587  | 65436007  | protein_coding | 4,34 | 0 |
| ENSG00000138802 | SEC24B     | 4  | 109433772 | 109540896 | protein_coding | 4,33 | 0 |
| ENSG00000134716 | CYP2J2     | 1  | 59893308  | 59926790  | protein_coding | 4,33 | 0 |
| ENSG00000095139 | ARCN1      | 11 | 118572390 | 118603033 | protein_coding | 4,33 | 0 |
| ENSG00000143164 | DCAF6      | 1  | 167935783 | 168075843 | protein_coding | 4,33 | 0 |
| ENSG00000198218 | QRICH1     | 3  | 49029707  | 49094363  | protein_coding | 4,32 | 0 |
| ENSG00000173674 | EIF1AX     | X  | 20124518  | 20141844  | protein_coding | 4,32 | 0 |
| ENSG00000136367 | ZFHX2      | 14 | 23520855  | 23556192  | protein_coding | 4,31 | 0 |
| ENSG00000113391 | FAM172A    | 5  | 93618069  | 94111699  | protein_coding | 4,31 | 0 |
| ENSG00000124532 | MRS2       | 6  | 24402908  | 24426194  | protein_coding | 4,30 | 0 |
| ENSG00000164604 | GPR85      | 7  | 113078331 | 113087778 | protein_coding | 4,30 | 0 |
| ENSG00000198752 | CDC42BPB   | 14 | 102932379 | 103057462 | protein_coding | 4,30 | 0 |
| ENSG00000102221 | JADE3      | X  | 46912276  | 47061242  | protein_coding | 4,30 | 0 |
| ENSG00000151846 | PABPC3     | 13 | 25095868  | 25099254  | protein_coding | 4,30 | 0 |
| ENSG00000124120 | TTPAL      | 20 | 44475886  | 44494603  | protein_coding | 4,30 | 0 |
| ENSG00000116096 | SPR        | 2  | 72887360  | 72892158  | protein_coding | 4,29 | 0 |
| ENSG00000109436 | TBC1D9     | 4  | 140620765 | 140756120 | protein_coding | 4,29 | 0 |
| ENSG00000177425 | PAWR       | 12 | 79574979  | 79691097  | protein_coding | 4,29 | 0 |
| ENSG00000163072 | NOSTRIN    | 2  | 168786539 | 168865514 | protein_coding | 4,28 | 0 |
| ENSG00000004866 | ST7        | 7  | 116953238 | 117230103 | protein_coding | 4,28 | 0 |
| ENSG00000176018 | LYSM3      | 5  | 90515611  | 90529584  | protein_coding | 4,28 | 0 |
| ENSG00000136937 | NCBP1      | 9  | 97633626  | 97673748  | protein_coding | 4,28 | 0 |
| ENSG00000100014 | SPECC1L    | 22 | 24270817  | 24417740  | protein_coding | 4,28 | 0 |
| ENSG00000162402 | USP24      | 1  | 55066359  | 55215113  | protein_coding | 4,28 | 0 |
| ENSG00000100982 | PCIF1      | 20 | 45934628  | 45948023  | protein_coding | 4,28 | 0 |
| ENSG00000111911 | HINT3      | 6  | 125956781 | 125980244 | protein_coding | 4,27 | 0 |
| ENSG00000172534 | HCFC1      | X  | 153947553 | 153971807 | protein_coding | 4,27 | 0 |
| ENSG00000090989 | EXOC1      | 4  | 55853616  | 55905034  | protein_coding | 4,27 | 0 |
| ENSG00000222011 | FAM185A    | 7  | 102748971 | 102809225 | protein_coding | 4,27 | 0 |
| ENSG00000087365 | SF3B2      | 11 | 66050729  | 66069308  | protein_coding | 4,27 | 0 |
| ENSG00000138777 | PPA2       | 4  | 105369077 | 105474081 | protein_coding | 4,26 | 0 |
| ENSG00000029153 | ARNTL2     | 12 | 27332854  | 27425289  | protein_coding | 4,26 | 0 |
| ENSG00000066777 | ARFGEF1    | 8  | 67173511  | 67343677  | protein_coding | 4,25 | 0 |
| ENSG00000166503 | ENSG000001 | 15 | 83112738  | 83208018  | protein_coding | 4,25 | 0 |
| ENSG00000113580 | NR3C1      | 5  | 143277931 | 143435512 | protein_coding | 4,25 | 0 |
| ENSG00000136206 | SPDYE1     | 7  | 44000889  | 44010122  | protein_coding | 4,25 | 0 |
| ENSG00000158457 | TSPAN33    | 7  | 129144892 | 129169697 | protein_coding | 4,25 | 0 |
| ENSG00000072609 | CHFR       | 12 | 132822187 | 132956304 | protein_coding | 4,24 | 0 |
| ENSG00000088298 | EDEM2      | 20 | 35115357  | 35147364  | protein_coding | 4,24 | 0 |
| ENSG00000170542 | SERPINB9   | 6  | 2887266   | 2903280   | protein_coding | 4,24 | 0 |
| ENSG00000124201 | ZNFX1      | 20 | 49237946  | 49278426  | protein_coding | 4,24 | 0 |

|                 |            |    |           |           |                |      |   |
|-----------------|------------|----|-----------|-----------|----------------|------|---|
| ENSG00000092148 | HECTD1     | 14 | 31100112  | 31207804  | protein_coding | 4,24 | 0 |
| ENSG00000070950 | RAD18      | 3  | 8775402   | 8963773   | protein_coding | 4,24 | 0 |
| ENSG00000081386 | ZNF510     | 9  | 96755865  | 96778129  | protein_coding | 4,24 | 0 |
| ENSG00000120662 | MTRF1      | 13 | 41216369  | 41263577  | protein_coding | 4,23 | 0 |
| ENSG00000145868 | FBXO38     | 5  | 148383935 | 148442836 | protein_coding | 4,23 | 0 |
| ENSG00000165626 | BEND7      | 10 | 13438484  | 13528974  | protein_coding | 4,23 | 0 |
| ENSG00000057608 | GDI2       | 10 | 5765223   | 5842132   | protein_coding | 4,23 | 0 |
| ENSG00000132141 | CCT6B      | 17 | 34927859  | 34981078  | protein_coding | 4,23 | 0 |
| ENSG00000197037 | ZSCAN25    | 7  | 99616946  | 99632407  | protein_coding | 4,22 | 0 |
| ENSG00000117543 | DPH5       | 1  | 100989623 | 101026088 | protein_coding | 4,22 | 0 |
| ENSG00000185684 | EP400NL    | 12 | 132084283 | 132131639 | protein_coding | 4,21 | 0 |
| ENSG00000149311 | ATM        | 11 | 108222484 | 108369102 | protein_coding | 4,21 | 0 |
| ENSG00000214022 | REPIN1     | 7  | 150368189 | 150374044 | protein_coding | 4,20 | 0 |
| ENSG00000101052 | IFT52      | 20 | 43590931  | 43647296  | protein_coding | 4,20 | 0 |
| ENSG00000181192 | DHTKD1     | 10 | 12068972  | 12123225  | protein_coding | 4,20 | 0 |
| ENSG00000224470 | ATXN1L     | 16 | 71845991  | 71885268  | protein_coding | 4,20 | 0 |
| ENSG00000186522 | 09/01/2010 | 2  | 109542982 | 109614206 | protein_coding | 4,20 | 0 |
| ENSG00000166197 | NOLC1      | 10 | 102152176 | 102163871 | protein_coding | 4,20 | 0 |
| ENSG00000085978 | ATG16L1    | 2  | 233210051 | 233295674 | protein_coding | 4,18 | 0 |
| ENSG00000122728 | TAF1L      | 9  | 32629454  | 32635669  | protein_coding | 4,18 | 0 |
| ENSG00000071242 | RPS6KA2    | 6  | 166409364 | 166906451 | protein_coding | 4,18 | 0 |
| ENSG00000116874 | WARS2      | 1  | 119031216 | 119140671 | protein_coding | 4,17 | 0 |
| ENSG00000086200 | IPO11      | 5  | 62403972  | 62628582  | protein_coding | 4,17 | 0 |
| ENSG00000112282 | MED23      | 6  | 131573966 | 131628229 | protein_coding | 4,17 | 0 |
| ENSG00000113163 | COL4A3BP   | 5  | 75368486  | 75512138  | protein_coding | 4,16 | 0 |
| ENSG00000221909 | FAM200A    | 7  | 99546308  | 99558536  | protein_coding | 4,16 | 0 |
| ENSG00000174010 | KLHL15     | X  | 23983720  | 24027186  | protein_coding | 4,15 | 0 |
| ENSG00000196417 | ZNF765     | 19 | 53389793  | 53430413  | protein_coding | 4,15 | 0 |
| ENSG00000164187 | LMBRD2     | 5  | 36098412  | 36151961  | protein_coding | 4,15 | 0 |
| ENSG00000011105 | TSPAN9     | 12 | 3077355   | 3286564   | protein_coding | 4,15 | 0 |
| ENSG00000167085 | PHB        | 17 | 49404049  | 49414905  | protein_coding | 4,15 | 0 |
| ENSG00000143578 | CREB3L4    | 1  | 153967534 | 153974363 | protein_coding | 4,15 | 0 |
| ENSG00000075151 | EIF4G3     | 1  | 20806292  | 21176888  | protein_coding | 4,15 | 0 |
| ENSG00000177853 | ZNF518A    | 10 | 96129715  | 96205288  | protein_coding | 4,14 | 0 |
| ENSG00000138363 | ATIC       | 2  | 215311817 | 215349773 | protein_coding | 4,14 | 0 |
| ENSG00000171962 | DRC3       | 17 | 17972813  | 18016889  | protein_coding | 4,14 | 0 |
| ENSG00000167491 | GATAD2A    | 19 | 19385826  | 19508931  | protein_coding | 4,14 | 0 |
| ENSG00000103404 | USP31      | 16 | 23061406  | 23149270  | protein_coding | 4,14 | 0 |
| ENSG00000133026 | MYH10      | 17 | 8474205   | 8630761   | protein_coding | 4,14 | 0 |
| ENSG00000116704 | SLC35D1    | 1  | 66999332  | 67054099  | protein_coding | 4,13 | 0 |
| ENSG00000070756 | PABPC1     | 8  | 100685816 | 100722809 | protein_coding | 4,13 | 0 |
| ENSG00000099956 | SMARCB1    | 22 | 23786963  | 23834516  | protein_coding | 4,13 | 0 |
| ENSG00000204977 | TRIM13     | 13 | 49995888  | 50020481  | protein_coding | 4,12 | 0 |
| ENSG00000137166 | FOXP4      | 6  | 41546426  | 41602384  | protein_coding | 4,12 | 0 |
| ENSG00000118579 | MED28      | 4  | 17614631  | 17634105  | protein_coding | 4,12 | 0 |
| ENSG00000185379 | RAD51D     | 17 | 35092208  | 35121522  | protein_coding | 4,12 | 0 |
| ENSG00000198876 | DCAF12     | 9  | 34086387  | 34127399  | protein_coding | 4,12 | 0 |
| ENSG00000196150 | ZNF250     | 8  | 144876497 | 144902168 | protein_coding | 4,12 | 0 |
| ENSG00000078140 | UBE2K      | 4  | 39698044  | 39782792  | protein_coding | 4,11 | 0 |
| ENSG00000170037 | CNTROB     | 17 | 7932101   | 7949918   | protein_coding | 4,11 | 0 |
| ENSG00000114388 | NPRL2      | 3  | 50347330  | 50351091  | protein_coding | 4,11 | 0 |
| ENSG00000128266 | GNAZ       | 22 | 23070361  | 23125037  | protein_coding | 4,10 | 0 |
| ENSG00000182704 | TSKU       | 11 | 76782251  | 76798154  | protein_coding | 4,10 | 0 |
| ENSG00000104522 | TSTA3      | 8  | 143612618 | 143618048 | protein_coding | 4,10 | 0 |
| ENSG00000134602 | STK26      | X  | 132023265 | 132075943 | protein_coding | 4,10 | 0 |
| ENSG00000196535 | MYO18A     | 17 | 29073517  | 29180412  | protein_coding | 4,10 | 0 |
| ENSG00000133858 | ZFC3H1     | 12 | 71609472  | 71667725  | protein_coding | 4,09 | 0 |
| ENSG00000175161 | CADM2      | 3  | 84958981  | 86074429  | protein_coding | 4,09 | 0 |

|                 |           |    |           |           |                |      |   |
|-----------------|-----------|----|-----------|-----------|----------------|------|---|
| ENSG00000249715 | FER1L5    | 2  | 96642737  | 96704887  | protein_coding | 4,09 | 0 |
| ENSG00000160710 | ADAR      | 1  | 154582062 | 154627999 | protein_coding | 4,09 | 0 |
| ENSG00000183955 | SETD8     | 12 | 123383773 | 123409358 | protein_coding | 4,08 | 0 |
| ENSG00000120438 | TCP1      | 6  | 159778498 | 159789749 | protein_coding | 4,08 | 0 |
| ENSG00000116128 | BCL9      | 1  | 147541412 | 147626216 | protein_coding | 4,08 | 0 |
| ENSG00000163104 | SMARCAD1  | 4  | 94207611  | 94291292  | protein_coding | 4,08 | 0 |
| ENSG00000173598 | NUDT4     | 12 | 93377883  | 93408146  | protein_coding | 4,08 | 0 |
| ENSG00000138814 | PPP3CA    | 4  | 101023409 | 101348278 | protein_coding | 4,08 | 0 |
| ENSG00000003509 | NDUFAF7   | 2  | 37231631  | 37253403  | protein_coding | 4,08 | 0 |
| ENSG00000075303 | SLC25A40  | 7  | 87833568  | 87876357  | protein_coding | 4,06 | 0 |
| ENSG00000147601 | TERF1     | 8  | 73008864  | 73048122  | protein_coding | 4,05 | 0 |
| ENSG00000171603 | CLSTN1    | 1  | 9729026   | 9824526   | protein_coding | 4,05 | 0 |
| ENSG00000166349 | RAG1      | 11 | 36510709  | 36593156  | protein_coding | 4,05 | 0 |
| ENSG00000138641 | HERC3     | 4  | 88521048  | 88708542  | protein_coding | 4,05 | 0 |
| ENSG00000129158 | SERGEF    | 11 | 17788048  | 18013162  | protein_coding | 4,04 | 0 |
| ENSG00000132478 | UNK       | 17 | 75784771  | 75825799  | protein_coding | 4,04 | 0 |
| ENSG00000100154 | TTC28     | 22 | 27978014  | 28679865  | protein_coding | 4,04 | 0 |
| ENSG00000075292 | ZNF638    | 2  | 71276561  | 71435069  | protein_coding | 4,04 | 0 |
| ENSG00000152104 | PTPN14    | 1  | 214348696 | 214552449 | protein_coding | 4,04 | 0 |
| ENSG00000102934 | PLLP      | 16 | 57248547  | 57284687  | protein_coding | 4,04 | 0 |
| ENSG00000109118 | PHF12     | 17 | 28905250  | 28951771  | protein_coding | 4,04 | 0 |
| ENSG00000163602 | RYBP      | 3  | 72371825  | 72446918  | protein_coding | 4,03 | 0 |
| ENSG00000101150 | TPD52L2   | 20 | 63865228  | 63891545  | protein_coding | 4,03 | 0 |
| ENSG00000164327 | RICTOR    | 5  | 38937919  | 39074408  | protein_coding | 4,03 | 0 |
| ENSG00000055208 | TAB2      | 6  | 149218641 | 149411613 | protein_coding | 4,02 | 0 |
| ENSG00000198246 | SLC29A3   | 10 | 71319258  | 71363385  | protein_coding | 4,02 | 0 |
| ENSG00000134278 | SPIRE1    | 18 | 12446512  | 12658134  | protein_coding | 4,02 | 0 |
| ENSG00000148606 | POLR3A    | 10 | 77969251  | 78029545  | protein_coding | 4,02 | 0 |
| ENSG00000105983 | LMBR1     | 7  | 156668946 | 156893230 | protein_coding | 4,02 | 0 |
| ENSG00000164346 | NSA2      | 5  | 74766991  | 74780113  | protein_coding | 4,02 | 0 |
| ENSG00000114416 | FXR1      | 3  | 180868141 | 180982753 | protein_coding | 4,01 | 0 |
| ENSG00000129657 | SEC14L1   | 17 | 77086716  | 77217101  | protein_coding | 4,01 | 0 |
| ENSG00000017260 | ATP2C1    | 3  | 130850595 | 131016712 | protein_coding | 4,00 | 0 |
| ENSG00000129673 | AANAT     | 17 | 76453351  | 76470117  | protein_coding | 4,00 | 0 |
| ENSG00000171989 | LDHAL6B   | 15 | 59206823  | 59208515  | protein_coding | 4,00 | 0 |
| ENSG00000150455 | TIRAP     | 11 | 126283065 | 126298845 | protein_coding | 4,00 | 0 |
| ENSG00000186051 | TAL2      | 9  | 105662457 | 105663112 | protein_coding | 4,00 | 0 |
| ENSG00000188152 | NUTM2G    | 9  | 96928310  | 96940253  | protein_coding | 4,00 | 0 |
| ENSG00000275713 | HIST1H2BH | 6  | 26251651  | 26253710  | protein_coding | 4,00 | 0 |
| ENSG00000163032 | VSNL1     | 2  | 17539126  | 17657018  | protein_coding | 4,00 | 0 |
| ENSG00000187808 | SOWAHD    | X  | 119758613 | 119760164 | protein_coding | 4,00 | 0 |
| ENSG00000107104 | KANK1     | 9  | 470291    | 746106    | protein_coding | 4,00 | 0 |
| ENSG00000101452 | DHX35     | 20 | 38962299  | 39039723  | protein_coding | 3,99 | 0 |
| ENSG00000163029 | SMC6      | 2  | 17663812  | 17800242  | protein_coding | 3,99 | 0 |
| ENSG00000122557 | HERPUD2   | 7  | 35632659  | 35695571  | protein_coding | 3,99 | 0 |
| ENSG00000128833 | MYO5C     | 15 | 52192322  | 52295798  | protein_coding | 3,99 | 0 |
| ENSG00000104408 | EIF3E     | 8  | 108201216 | 108435333 | protein_coding | 3,98 | 0 |
| ENSG00000152683 | SLC30A6   | 2  | 32165841  | 32224379  | protein_coding | 3,98 | 0 |
| ENSG00000153790 | C7orf31   | 7  | 25134697  | 25180356  | protein_coding | 3,98 | 0 |
| ENSG00000180425 | C11orf71  | 11 | 114391443 | 114400550 | protein_coding | 3,97 | 0 |
| ENSG00000112159 | MDN1      | 6  | 89642499  | 89819723  | protein_coding | 3,97 | 0 |
| ENSG00000047621 | C12orf4   | 12 | 4487728   | 4538508   | protein_coding | 3,97 | 0 |
| ENSG00000124356 | STAMBP    | 2  | 73828916  | 73873659  | protein_coding | 3,96 | 0 |
| ENSG00000004864 | SLC25A13  | 7  | 96120220  | 96322147  | protein_coding | 3,96 | 0 |
| ENSG00000119392 | GLE1      | 9  | 128504700 | 128542288 | protein_coding | 3,96 | 0 |
| ENSG00000054793 | ATP9A     | 20 | 51596514  | 51768634  | protein_coding | 3,95 | 0 |
| ENSG00000126870 | WDR60     | 7  | 158856578 | 158956747 | protein_coding | 3,95 | 0 |
| ENSG00000087301 | TXNDC16   | 14 | 52430590  | 52552522  | protein_coding | 3,95 | 0 |



|                 |          |    |           |           |                |      |   |
|-----------------|----------|----|-----------|-----------|----------------|------|---|
| ENSG00000134375 | TIMM17A  | 1  | 201955491 | 201970661 | protein_coding | 3,95 | 0 |
| ENSG00000164181 | ELOVL7   | 5  | 60751791  | 60844389  | protein_coding | 3,94 | 0 |
| ENSG00000112584 | FAM120B  | 6  | 170290703 | 170407065 | protein_coding | 3,93 | 0 |
| ENSG00000120910 | PPP3CC   | 8  | 22440819  | 22541142  | protein_coding | 3,93 | 0 |
| ENSG00000120370 | GORAB    | 1  | 170532129 | 170553446 | protein_coding | 3,93 | 0 |
| ENSG00000158985 | CDC42SE2 | 5  | 131245493 | 131398447 | protein_coding | 3,92 | 0 |
| ENSG00000163636 | PSMD6    | 3  | 64010549  | 64024010  | protein_coding | 3,92 | 0 |
| ENSG00000154447 | SH3RF1   | 4  | 169094256 | 169271105 | protein_coding | 3,92 | 0 |
| ENSG00000127314 | RAP1B    | 12 | 68610839  | 68671901  | protein_coding | 3,91 | 0 |
| ENSG00000148411 | NACC2    | 9  | 136006537 | 136095285 | protein_coding | 3,91 | 0 |
| ENSG00000145723 | GIN1     | 5  | 103086000 | 103120151 | protein_coding | 3,91 | 0 |
| ENSG00000110696 | C11orf58 | 11 | 16613132  | 16756881  | protein_coding | 3,91 | 0 |
| ENSG00000164654 | MIOS     | 7  | 7566872   | 7608929   | protein_coding | 3,90 | 0 |
| ENSG00000239389 | PCDHA13  | 5  | 140882208 | 141012344 | protein_coding | 3,90 | 0 |
| ENSG00000171943 | SRGAP2C  | 1  | 121184810 | 121392822 | protein_coding | 3,89 | 0 |
| ENSG00000143612 | C1orf43  | 1  | 154206706 | 154220628 | protein_coding | 3,89 | 0 |
| ENSG00000121749 | TBC1D15  | 12 | 71839707  | 71927248  | protein_coding | 3,89 | 0 |
| ENSG00000131697 | NPHP4    | 1  | 5862811   | 5992473   | protein_coding | 3,88 | 0 |
| ENSG00000100227 | POLDIP3  | 22 | 42583721  | 42614962  | protein_coding | 3,88 | 0 |
| ENSG00000107929 | LARP4B   | 10 | 806914    | 931705    | protein_coding | 3,88 | 0 |
| ENSG00000162894 | FCMR     | 1  | 206904386 | 206923247 | protein_coding | 3,88 | 0 |
| ENSG00000143303 | RRNAD1   | 1  | 156728442 | 156736960 | protein_coding | 3,87 | 0 |
| ENSG00000143367 | TUFT1    | 1  | 151540305 | 151583583 | protein_coding | 3,87 | 0 |
| ENSG00000123444 | KBTBD4   | 11 | 47572197  | 47579015  | protein_coding | 3,87 | 0 |
| ENSG00000126457 | PRMT1    | 19 | 49675786  | 49689029  | protein_coding | 3,87 | 0 |
| ENSG00000116062 | MSH6     | 2  | 47695530  | 47810101  | protein_coding | 3,87 | 0 |
| ENSG00000171862 | PTEN     | 10 | 87863113  | 87971930  | protein_coding | 3,86 | 0 |
| ENSG00000172053 | QARS     | 3  | 49095932  | 49105135  | protein_coding | 3,86 | 0 |
| ENSG00000135387 | CAPRIN1  | 11 | 34051683  | 34101156  | protein_coding | 3,86 | 0 |
| ENSG00000244005 | NFS1     | 20 | 35668055  | 35699359  | protein_coding | 3,86 | 0 |
| ENSG00000156795 | WDYHV1   | 8  | 123416725 | 123467230 | protein_coding | 3,86 | 0 |
| ENSG00000136560 | TANK     | 2  | 161136908 | 161236221 | protein_coding | 3,85 | 0 |
| ENSG00000006607 | FARP2    | 2  | 241356243 | 241494841 | protein_coding | 3,85 | 0 |
| ENSG00000131238 | PPT1     | 1  | 40072705  | 40097703  | protein_coding | 3,85 | 0 |
| ENSG00000170100 | ZNF778   | 16 | 89217703  | 89237071  | protein_coding | 3,85 | 0 |
| ENSG00000150991 | UBC      | 12 | 124911604 | 124917368 | protein_coding | 3,85 | 0 |
| ENSG00000243710 | CFAP57   | 1  | 43172149  | 43254358  | protein_coding | 3,85 | 0 |
| ENSG00000165699 | TSC1     | 9  | 132891348 | 132944633 | protein_coding | 3,85 | 0 |
| ENSG00000182150 | ERCC6L2  | 9  | 95875701  | 96014571  | protein_coding | 3,84 | 0 |
| ENSG00000197714 | ZNF460   | 19 | 57280051  | 57293569  | protein_coding | 3,84 | 0 |
| ENSG00000161955 | TNFSF13  | 17 | 7558292   | 7561608   | protein_coding | 3,84 | 0 |
| ENSG00000140526 | ABHD2    | 15 | 89087459  | 89202360  | protein_coding | 3,83 | 0 |
| ENSG00000060566 | CREB3L3  | 19 | 4153601   | 4173054   | protein_coding | 3,83 | 0 |
| ENSG00000131089 | ARHGEF9  | X  | 63634967  | 63809274  | protein_coding | 3,83 | 0 |
| ENSG00000234444 | ZNF736   | 7  | 64307459  | 64354860  | protein_coding | 3,83 | 0 |
| ENSG00000072401 | UBE2D1   | 10 | 58334975  | 58370753  | protein_coding | 3,83 | 0 |
| ENSG00000162600 | OMA1     | 1  | 58415384  | 58546802  | protein_coding | 3,83 | 0 |
| ENSG00000152208 | GRID2    | 4  | 92303622  | 93774556  | protein_coding | 3,83 | 0 |
| ENSG00000172661 | FAM21C   | 10 | 45727200  | 45792961  | protein_coding | 3,82 | 0 |
| ENSG00000134014 | ELP3     | 8  | 28089673  | 28191156  | protein_coding | 3,82 | 0 |
| ENSG00000135537 | LACE1    | 6  | 108294894 | 108526796 | protein_coding | 3,82 | 0 |
| ENSG00000174405 | LIG4     | 13 | 108207439 | 108218368 | protein_coding | 3,82 | 0 |
| ENSG00000137310 | TCF19    | 6  | 31158542  | 31167159  | protein_coding | 3,82 | 0 |
| ENSG00000145041 | VPRBP    | 3  | 51395867  | 51500002  | protein_coding | 3,81 | 0 |
| ENSG00000102978 | POLR2C   | 16 | 57462387  | 57472010  | protein_coding | 3,81 | 0 |
| ENSG00000174032 | SLC25A30 | 13 | 45393316  | 45418455  | protein_coding | 3,81 | 0 |
| ENSG00000116138 | DNAJC16  | 1  | 15526813  | 15592379  | protein_coding | 3,81 | 0 |
| ENSG00000197969 | VPS13A   | 9  | 77177353  | 77421541  | protein_coding | 3,80 | 0 |

|                 |           |    |           |           |                |      |   |
|-----------------|-----------|----|-----------|-----------|----------------|------|---|
| ENSG00000114062 | UBE3A     | 15 | 25333728  | 25439056  | protein_coding | 3,80 | 0 |
| ENSG00000205929 | C21orf62  | 21 | 32790674  | 32813743  | protein_coding | 3,80 | 0 |
| ENSG00000204963 | PCDHA7    | 5  | 140834248 | 141012344 | protein_coding | 3,80 | 0 |
| ENSG00000205572 | SERF1B    | 5  | 70025247  | 70043113  | protein_coding | 3,80 | 0 |
| ENSG00000118640 | VAMP8     | 2  | 85561562  | 85582031  | protein_coding | 3,80 | 0 |
| ENSG00000203685 | C1orf95   | 1  | 226548800 | 226609214 | protein_coding | 3,80 | 0 |
| ENSG00000122644 | ARL4A     | 7  | 12686856  | 12690934  | protein_coding | 3,80 | 0 |
| ENSG00000065243 | PKN2      | 1  | 88684222  | 88836255  | protein_coding | 3,80 | 0 |
| ENSG00000118900 | UBN1      | 16 | 4846665   | 4882360   | protein_coding | 3,80 | 0 |
| ENSG00000081760 | AACS      | 12 | 125065379 | 125143333 | protein_coding | 3,80 | 0 |
| ENSG00000253719 | ATXN7L3B  | 12 | 74537827  | 74545430  | protein_coding | 3,79 | 0 |
| ENSG00000144647 | POMGNT2   | 3  | 43079232  | 43106076  | protein_coding | 3,79 | 0 |
| ENSG00000104980 | TIMM44    | 19 | 7926718   | 7943920   | protein_coding | 3,79 | 0 |
| ENSG00000124613 | ZNF391    | 6  | 27374615  | 27403904  | protein_coding | 3,79 | 0 |
| ENSG00000089335 | ZNF302    | 19 | 34677639  | 34686397  | protein_coding | 3,78 | 0 |
| ENSG00000075413 | MARK3     | 14 | 103385392 | 103503831 | protein_coding | 3,78 | 0 |
| ENSG00000196787 | HIST1H2AG | 6  | 27133042  | 27135291  | protein_coding | 3,78 | 0 |
| ENSG00000125868 | DSTN      | 20 | 17569863  | 17609919  | protein_coding | 3,78 | 0 |
| ENSG00000181852 | RNF41     | 12 | 56202175  | 56221933  | protein_coding | 3,78 | 0 |
| ENSG00000099901 | RANBP1    | 22 | 20115938  | 20127357  | protein_coding | 3,78 | 0 |
| ENSG00000062485 | CS        | 12 | 56271699  | 56300392  | protein_coding | 3,77 | 0 |
| ENSG00000196323 | ZBTB44    | 11 | 130226677 | 130314686 | protein_coding | 3,77 | 0 |
| ENSG00000170759 | KIF5B     | 10 | 32009010  | 32056431  | protein_coding | 3,77 | 0 |
| ENSG00000130348 | QRSL1     | 6  | 106629578 | 106668417 | protein_coding | 3,77 | 0 |
| ENSG00000144233 | AMMECR1L  | 2  | 127861630 | 127885922 | protein_coding | 3,77 | 0 |
| ENSG00000120457 | KCNJ5     | 11 | 128891356 | 128921035 | protein_coding | 3,76 | 0 |
| ENSG00000128585 | MKLN1     | 7  | 131110096 | 131496636 | protein_coding | 3,76 | 0 |
| ENSG00000177034 | MTX3      | 5  | 79976731  | 79991262  | protein_coding | 3,76 | 0 |
| ENSG00000172292 | CERS6     | 2  | 168455862 | 168775137 | protein_coding | 3,76 | 0 |
| ENSG00000102081 | FMR1      | X  | 147911951 | 147951125 | protein_coding | 3,75 | 0 |
| ENSG00000196312 | HIATL2    | 9  | 96898066  | 97013580  | protein_coding | 3,75 | 0 |
| ENSG00000127616 | SMARCA4   | 19 | 10961001  | 11065395  | protein_coding | 3,75 | 0 |
| ENSG00000198498 | TMA16     | 4  | 163494442 | 163520539 | protein_coding | 3,75 | 0 |
| ENSG00000004961 | HCCS      | X  | 11111301  | 11123078  | protein_coding | 3,74 | 0 |
| ENSG00000144283 | PKP4      | 2  | 158456964 | 158682879 | protein_coding | 3,74 | 0 |
| ENSG00000103126 | AXIN1     | 16 | 287440    | 352673    | protein_coding | 3,74 | 0 |
| ENSG00000103160 | HSDL1     | 16 | 84122146  | 84145192  | protein_coding | 3,74 | 0 |
| ENSG00000174370 | C11orf45  | 11 | 128899565 | 128906035 | protein_coding | 3,74 | 0 |
| ENSG00000070010 | UFD1L     | 22 | 19449910  | 19479215  | protein_coding | 3,74 | 0 |
| ENSG00000136152 | COG3      | 13 | 45464898  | 45536630  | protein_coding | 3,74 | 0 |
| ENSG00000164930 | FZD6      | 8  | 103298433 | 103332866 | protein_coding | 3,74 | 0 |
| ENSG00000184743 | ATL3      | 11 | 63624087  | 63671921  | protein_coding | 3,73 | 0 |
| ENSG00000112685 | EXOC2     | 6  | 485133    | 693111    | protein_coding | 3,73 | 0 |
| ENSG00000156050 | FAM161B   | 14 | 73931501  | 73950414  | protein_coding | 3,73 | 0 |
| ENSG00000137073 | UBAP2     | 9  | 33921693  | 34048949  | protein_coding | 3,73 | 0 |
| ENSG00000143727 | ACP1      | 2  | 264140    | 278283    | protein_coding | 3,73 | 0 |
| ENSG00000178074 | C2orf69   | 2  | 199911256 | 199955935 | protein_coding | 3,73 | 0 |
| ENSG00000165832 | TRUB1     | 10 | 114938193 | 114977676 | protein_coding | 3,72 | 0 |
| ENSG00000104356 | POP1      | 8  | 98117297  | 98159834  | protein_coding | 3,72 | 0 |
| ENSG00000177119 | ANO6      | 12 | 45215987  | 45440404  | protein_coding | 3,72 | 0 |
| ENSG00000103061 | SLC7A6OS  | 16 | 68284503  | 68310951  | protein_coding | 3,72 | 0 |
| ENSG00000168234 | TTC39C    | 18 | 23992773  | 24135610  | protein_coding | 3,72 | 0 |
| ENSG00000176390 | CRLF3     | 17 | 30769388  | 30824776  | protein_coding | 3,72 | 0 |
| ENSG00000155657 | TTN       | 2  | 178525989 | 178830802 | protein_coding | 3,72 | 0 |
| ENSG00000164663 | USP49     | 6  | 41789896  | 41895361  | protein_coding | 3,71 | 0 |
| ENSG00000091483 | FH        | 1  | 241497603 | 241519761 | protein_coding | 3,71 | 0 |
| ENSG00000168004 | HRASLS5   | 11 | 63461404  | 63491194  | protein_coding | 3,71 | 0 |
| ENSG00000113838 | TBCCD1    | 3  | 186546073 | 186570543 | protein_coding | 3,71 | 0 |

|                 |          |    |           |           |                |      |   |
|-----------------|----------|----|-----------|-----------|----------------|------|---|
| ENSG00000204256 | BRD2     | 6  | 32968660  | 32981505  | protein_coding | 3,70 | 0 |
| ENSG00000170606 | HSPA4    | 5  | 133051962 | 133106449 | protein_coding | 3,70 | 0 |
| ENSG00000132692 | BCAN     | 1  | 156641390 | 156659532 | protein_coding | 3,70 | 0 |
| ENSG00000196152 | ZNF79    | 9  | 127424374 | 127445372 | protein_coding | 3,70 | 0 |
| ENSG00000213020 | ZNF611   | 19 | 52702813  | 52735073  | protein_coding | 3,70 | 0 |
| ENSG00000151148 | UBE3B    | 12 | 109477402 | 109536705 | protein_coding | 3,70 | 0 |
| ENSG00000086848 | ALG9     | 11 | 111782195 | 111871581 | protein_coding | 3,69 | 0 |
| ENSG00000163161 | ERCC3    | 2  | 127257290 | 127294176 | protein_coding | 3,69 | 0 |
| ENSG00000174842 | GLMN     | 1  | 92246402  | 92298987  | protein_coding | 3,69 | 0 |
| ENSG00000138594 | TMOD3    | 15 | 51829628  | 51947295  | protein_coding | 3,69 | 0 |
| ENSG00000137770 | CTDSP2   | 15 | 44427234  | 44529038  | protein_coding | 3,68 | 0 |
| ENSG00000179456 | ZBTB18   | 1  | 244048939 | 244057476 | protein_coding | 3,68 | 0 |
| ENSG00000151718 | WWC2     | 4  | 183099293 | 183320777 | protein_coding | 3,68 | 0 |
| ENSG00000168172 | HOOK3    | 8  | 42896932  | 43030539  | protein_coding | 3,68 | 0 |
| ENSG00000135164 | DMTF1    | 7  | 87152361  | 87196337  | protein_coding | 3,68 | 0 |
| ENSG00000183671 | GPR1     | 2  | 206175316 | 206218047 | protein_coding | 3,68 | 0 |
| ENSG00000180787 | ZFP3     | 17 | 5078248   | 5096374   | protein_coding | 3,67 | 0 |
| ENSG00000214013 | GANC     | 15 | 42273233  | 42356935  | protein_coding | 3,67 | 0 |
| ENSG0000010292  | NCAPD2   | 12 | 6493356   | 6531955   | protein_coding | 3,67 | 0 |
| ENSG00000150076 | CCDC7    | 10 | 32567723  | 32882874  | protein_coding | 3,67 | 0 |
| ENSG00000173041 | ZNF680   | 7  | 64519884  | 64563106  | protein_coding | 3,66 | 0 |
| ENSG00000160602 | NEK8     | 17 | 28725897  | 28743455  | protein_coding | 3,66 | 0 |
| ENSG00000100266 | PACSIN2  | 22 | 42835412  | 43015145  | protein_coding | 3,66 | 0 |
| ENSG00000244754 | N4BP2L2  | 13 | 32432417  | 32538885  | protein_coding | 3,66 | 0 |
| ENSG00000184047 | DIABLO   | 12 | 122207662 | 122227534 | protein_coding | 3,65 | 0 |
| ENSG00000158079 | PTPDC1   | 9  | 94030794  | 94109856  | protein_coding | 3,65 | 0 |
| ENSG00000128881 | TTBK2    | 15 | 42738734  | 42920809  | protein_coding | 3,65 | 0 |
| ENSG00000159459 | UBR1     | 15 | 42942897  | 43106113  | protein_coding | 3,65 | 0 |
| ENSG00000143951 | WDPCP    | 2  | 63121383  | 63827843  | protein_coding | 3,65 | 0 |
| ENSG00000236104 | ZBTB22   | 6  | 33314406  | 33317942  | protein_coding | 3,64 | 0 |
| ENSG00000081154 | PCNP     | 3  | 101574095 | 101594437 | protein_coding | 3,64 | 0 |
| ENSG00000142731 | PLK4     | 4  | 127880861 | 127899195 | protein_coding | 3,63 | 0 |
| ENSG00000101347 | SAMHD1   | 20 | 36890229  | 36951843  | protein_coding | 3,63 | 0 |
| ENSG00000144711 | IQSEC1   | 3  | 12897220  | 13073117  | protein_coding | 3,63 | 0 |
| ENSG00000148229 | POLE3    | 9  | 113407235 | 113410672 | protein_coding | 3,63 | 0 |
| ENSG00000005007 | UPF1     | 19 | 18831938  | 18868236  | protein_coding | 3,63 | 0 |
| ENSG00000198081 | ZBTB14   | 18 | 5289019   | 5297053   | protein_coding | 3,63 | 0 |
| ENSG00000175395 | ZNF25    | 10 | 37949572  | 37976633  | protein_coding | 3,63 | 0 |
| ENSG00000132561 | MATN2    | 8  | 97868840  | 98036716  | protein_coding | 3,63 | 0 |
| ENSG00000170624 | SGCD     | 5  | 155870344 | 156767788 | protein_coding | 3,62 | 0 |
| ENSG00000135253 | KCP      | 7  | 128862451 | 128910719 | protein_coding | 3,62 | 0 |
| ENSG00000135250 | SRPK2    | 7  | 105110704 | 105399308 | protein_coding | 3,61 | 0 |
| ENSG00000151532 | VTI1A    | 10 | 112446998 | 112818744 | protein_coding | 3,61 | 0 |
| ENSG00000258405 | ZNF578   | 19 | 52453576  | 52512154  | protein_coding | 3,61 | 0 |
| ENSG00000005483 | KMT2E    | 7  | 105014179 | 105114361 | protein_coding | 3,61 | 0 |
| ENSG00000196914 | ARHGEF12 | 11 | 120336914 | 120489936 | protein_coding | 3,60 | 0 |
| ENSG00000213585 | VDAC1    | 5  | 133971915 | 134005133 | protein_coding | 3,60 | 0 |
| ENSG00000170776 | AKAP13   | 15 | 85380571  | 85749358  | protein_coding | 3,60 | 0 |
| ENSG00000162367 | TAL1     | 1  | 47216290  | 47232220  | protein_coding | 3,60 | 0 |
| ENSG00000198754 | OXCT2    | 1  | 39769523  | 39771348  | protein_coding | 3,60 | 0 |
| ENSG00000116667 | C1orf21  | 1  | 184387058 | 184629020 | protein_coding | 3,60 | 0 |
| ENSG00000183283 | DAZAP2   | 12 | 51238292  | 51271362  | protein_coding | 3,59 | 0 |
| ENSG00000102805 | CLN5     | 13 | 76990660  | 77002517  | protein_coding | 3,59 | 0 |
| ENSG00000121988 | ZRANB3   | 2  | 135136916 | 135531236 | protein_coding | 3,59 | 0 |
| ENSG00000168769 | TET2     | 4  | 105145875 | 105279816 | protein_coding | 3,58 | 0 |
| ENSG00000110514 | MADD     | 11 | 47269161  | 47330031  | protein_coding | 3,58 | 0 |
| ENSG00000171840 | NINJ2    | 12 | 564296    | 663779    | protein_coding | 3,58 | 0 |
| ENSG00000104756 | KCTD9    | 8  | 25427847  | 25458476  | protein_coding | 3,58 | 0 |

|                 |                 |    |           |           |                |      |   |
|-----------------|-----------------|----|-----------|-----------|----------------|------|---|
| ENSG00000141425 | RPRD1A          | 18 | 35984387  | 36067576  | protein_coding | 3,57 | 0 |
| ENSG00000158195 | WASF2           | 1  | 27404226  | 27490158  | protein_coding | 3,57 | 0 |
| ENSG00000180257 | ZNF816          | 19 | 52949379  | 52962911  | protein_coding | 3,57 | 0 |
| ENSG00000101109 | STK4            | 20 | 44966474  | 45079959  | protein_coding | 3,57 | 0 |
| ENSG00000006744 | ELAC2           | 17 | 12992391  | 13018187  | protein_coding | 3,57 | 0 |
| ENSG00000154146 | NRGN            | 11 | 124739846 | 124747210 | protein_coding | 3,57 | 0 |
| ENSG00000173567 | ADGRF3          | 2  | 26308173  | 26346817  | protein_coding | 3,57 | 0 |
| ENSG00000133657 | ATP13A3         | 3  | 194402672 | 194498364 | protein_coding | 3,57 | 0 |
| ENSG00000133256 | PDE6B           | 4  | 625584    | 670782    | protein_coding | 3,56 | 0 |
| ENSG00000106049 | HIBADH          | 7  | 27525442  | 27662995  | protein_coding | 3,56 | 0 |
| ENSG00000162695 | SLC30A7         | 1  | 100896076 | 100981753 | protein_coding | 3,56 | 0 |
| ENSG00000114742 | WDR48           | 3  | 39051998  | 39096671  | protein_coding | 3,56 | 0 |
| ENSG00000159111 | MRPL10          | 17 | 47823272  | 47831534  | protein_coding | 3,56 | 0 |
| ENSG00000114904 | NEK4            | 3  | 52708449  | 52770949  | protein_coding | 3,55 | 0 |
| ENSG00000172167 | MTBP            | 8  | 120445400 | 120542133 | protein_coding | 3,55 | 0 |
| ENSG00000070785 | EIF2B3          | 1  | 44850522  | 44986722  | protein_coding | 3,54 | 0 |
| ENSG00000203880 | PCMTD2          | 20 | 64255695  | 64287821  | protein_coding | 3,54 | 0 |
| ENSG00000011201 | ANOS1           | X  | 8528874   | 8732187   | protein_coding | 3,54 | 0 |
| ENSG00000013374 | NUB1            | 7  | 151341699 | 151378449 | protein_coding | 3,54 | 0 |
| ENSG00000272305 | ENSG00000272305 | 3  | 52969119  | 53099453  | protein_coding | 3,53 | 0 |
| ENSG00000185418 | TARSL2          | 15 | 101653598 | 101724604 | protein_coding | 3,53 | 0 |
| ENSG00000172062 | SMN1            | 5  | 70925030  | 70953942  | protein_coding | 3,53 | 0 |
| ENSG00000076513 | ANKRD13A        | 12 | 109999186 | 110039763 | protein_coding | 3,53 | 0 |
| ENSG00000251287 | ALG1L2          | 3  | 130081831 | 130113227 | protein_coding | 3,52 | 0 |
| ENSG00000121879 | PIK3CA          | 3  | 179148114 | 179240093 | protein_coding | 3,52 | 0 |
| ENSG00000160908 | ZNF394          | 7  | 99486519  | 99500324  | protein_coding | 3,52 | 0 |
| ENSG00000162616 | DNAJB4          | 1  | 77979175  | 78017964  | protein_coding | 3,52 | 0 |
| ENSG00000244462 | RBM12           | 20 | 35648925  | 35664956  | protein_coding | 3,52 | 0 |
| ENSG00000114520 | SNX4            | 3  | 125446644 | 125520197 | protein_coding | 3,52 | 0 |
| ENSG00000163050 | ADCK3           | 1  | 226897536 | 226987545 | protein_coding | 3,52 | 0 |
| ENSG00000188467 | SLC24A5         | 15 | 48120972  | 48142672  | protein_coding | 3,51 | 0 |
| ENSG00000105053 | VRK3            | 19 | 49976467  | 50025946  | protein_coding | 3,51 | 0 |
| ENSG00000101752 | MIB1            | 18 | 21704957  | 21870957  | protein_coding | 3,51 | 0 |
| ENSG00000196937 | FAM3C           | 7  | 121348851 | 121396364 | protein_coding | 3,51 | 0 |
| ENSG00000134313 | KIDINS220       | 2  | 8725278   | 8837630   | protein_coding | 3,51 | 0 |
| ENSG00000167984 | NLRC3           | 16 | 3539033   | 3577400   | protein_coding | 3,51 | 0 |
| ENSG00000177692 | DNAJC28         | 21 | 33485530  | 33491720  | protein_coding | 3,50 | 0 |
| ENSG00000249428 | CFAP99          | 4  | 2426476   | 2462926   | protein_coding | 3,50 | 0 |
| ENSG00000163568 | AIM2            | 1  | 159062484 | 159147096 | protein_coding | 3,50 | 0 |
| ENSG00000180957 | PITPNB          | 22 | 27851669  | 27920134  | protein_coding | 3,50 | 0 |
| ENSG00000136404 | TM6SF1          | 15 | 83107407  | 83144854  | protein_coding | 3,50 | 0 |
| ENSG00000131781 | FMO5            | 1  | 147175351 | 147243050 | protein_coding | 3,49 | 0 |
| ENSG00000134265 | NAPG            | 18 | 10525905  | 10552761  | protein_coding | 3,49 | 0 |
| ENSG00000066084 | DIP2B           | 12 | 50504985  | 50748667  | protein_coding | 3,49 | 0 |
| ENSG00000163781 | TOPBP1          | 3  | 133598175 | 133661893 | protein_coding | 3,48 | 0 |
| ENSG00000064999 | ANKS1A          | 6  | 34889265  | 35091413  | protein_coding | 3,48 | 0 |
| ENSG00000147099 | HDAC8           | X  | 72329516  | 72573103  | protein_coding | 3,48 | 0 |
| ENSG00000149231 | CCDC82          | 11 | 96352769  | 96389923  | protein_coding | 3,48 | 0 |
| ENSG00000137713 | PPP2R1B         | 11 | 111726908 | 111766427 | protein_coding | 3,48 | 0 |
| ENSG00000101193 | GID8            | 20 | 62938119  | 62948475  | protein_coding | 3,47 | 0 |
| ENSG00000214517 | PPME1           | 11 | 74171099  | 74254703  | protein_coding | 3,47 | 0 |
| ENSG00000197603 | C5orf42         | 5  | 37106228  | 37249428  | protein_coding | 3,47 | 0 |
| ENSG00000108064 | TFAM            | 10 | 58385022  | 58399221  | protein_coding | 3,47 | 0 |
| ENSG00000089022 | MAPKAPK5        | 12 | 111841978 | 111902238 | protein_coding | 3,47 | 0 |
| ENSG00000104067 | TJP1            | 15 | 29699367  | 29968865  | protein_coding | 3,47 | 0 |
| ENSG00000091039 | OSBPL8          | 12 | 76351797  | 76559809  | protein_coding | 3,46 | 0 |
| ENSG00000125304 | TM9SF2          | 13 | 99501417  | 99564006  | protein_coding | 3,46 | 0 |
| ENSG00000108578 | BLMH            | 17 | 30248195  | 30292056  | protein_coding | 3,46 | 0 |

|                 |            |    |           |           |                |      |   |
|-----------------|------------|----|-----------|-----------|----------------|------|---|
| ENSG00000169641 | LUZP1      | 1  | 23084023  | 23177808  | protein_coding | 3,45 | 0 |
| ENSG00000107821 | KAZALD1    | 10 | 101061841 | 101068131 | protein_coding | 3,45 | 0 |
| ENSG00000174780 | SRP72      | 4  | 56466915  | 56503680  | protein_coding | 3,45 | 0 |
| ENSG00000183576 | SETD3      | 14 | 99397746  | 99480889  | protein_coding | 3,45 | 0 |
| ENSG00000011114 | BTBD7      | 14 | 93237550  | 93333092  | protein_coding | 3,45 | 0 |
| ENSG00000213281 | NRAS       | 1  | 114704469 | 114716894 | protein_coding | 3,44 | 0 |
| ENSG00000090447 | TFAP4      | 16 | 4257186   | 4273075   | protein_coding | 3,43 | 0 |
| ENSG00000108312 | UBTF       | 17 | 44205033  | 44221626  | protein_coding | 3,43 | 0 |
| ENSG00000116750 | UCHL5      | 1  | 193012250 | 193060080 | protein_coding | 3,43 | 0 |
| ENSG00000079156 | OSBPL6     | 2  | 178194481 | 178402891 | protein_coding | 3,43 | 0 |
| ENSG00000196724 | ZNF418     | 19 | 57921884  | 57935393  | protein_coding | 3,42 | 0 |
| ENSG00000167384 | ZNF180     | 19 | 44474428  | 44500524  | protein_coding | 3,42 | 0 |
| ENSG00000064651 | SLC12A2    | 5  | 128083766 | 128189688 | protein_coding | 3,42 | 0 |
| ENSG00000166130 | IKBIP      | 12 | 98613405  | 98645113  | protein_coding | 3,42 | 0 |
| ENSG00000128513 | POT1       | 7  | 124822386 | 124929983 | protein_coding | 3,42 | 0 |
| ENSG00000168827 | GFM1       | 3  | 158644278 | 158692575 | protein_coding | 3,42 | 0 |
| ENSG00000163689 | C3orf67    | 3  | 58717365  | 59050084  | protein_coding | 3,41 | 0 |
| ENSG00000056097 | ZFR        | 5  | 32354350  | 32444761  | protein_coding | 3,41 | 0 |
| ENSG00000164074 | ABHD18     | 4  | 127965306 | 128039711 | protein_coding | 3,41 | 0 |
| ENSG00000278053 | DDX52      | 17 | 37609739  | 37643464  | protein_coding | 3,41 | 0 |
| ENSG00000268043 | NBPF12     | 1  | 146938744 | 146996202 | protein_coding | 3,41 | 0 |
| ENSG00000067900 | ROCK1      | 18 | 20946906  | 21111851  | protein_coding | 3,41 | 0 |
| ENSG00000144455 | SUMF1      | 3  | 3700814   | 4467281   | protein_coding | 3,41 | 0 |
| ENSG00000196369 | SRGAP2B    | 1  | 144887265 | 145095528 | protein_coding | 3,40 | 0 |
| ENSG00000145103 | ILDR1      | 3  | 121987323 | 122022204 | protein_coding | 3,40 | 0 |
| ENSG00000158604 | TMED4      | 7  | 44577894  | 44582287  | protein_coding | 3,40 | 0 |
| ENSG00000160310 | PRMT2      | 21 | 46635167  | 46665124  | protein_coding | 3,40 | 0 |
| ENSG00000139218 | SCAF11     | 12 | 45919131  | 45992120  | protein_coding | 3,40 | 0 |
| ENSG00000160199 | PKNOX1     | 21 | 42974510  | 43033931  | protein_coding | 3,39 | 0 |
| ENSG00000197557 | TTC30A     | 2  | 177612992 | 177618966 | protein_coding | 3,39 | 0 |
| ENSG00000102974 | CTCF       | 16 | 67562407  | 67639183  | protein_coding | 3,38 | 0 |
| ENSG00000097033 | SH3GLB1    | 1  | 86704570  | 86748184  | protein_coding | 3,38 | 0 |
| ENSG00000153317 | ASAP1      | 8  | 130052104 | 130443660 | protein_coding | 3,38 | 0 |
| ENSG00000140694 | PARN       | 16 | 14435701  | 14632728  | protein_coding | 3,38 | 0 |
| ENSG00000070087 | PFN2       | 3  | 149964904 | 150050788 | protein_coding | 3,38 | 0 |
| ENSG00000196715 | VKORC1L1   | 7  | 65873267  | 65959563  | protein_coding | 3,38 | 0 |
| ENSG00000145545 | SRD5A1     | 5  | 6633343   | 6674386   | protein_coding | 3,37 | 0 |
| ENSG00000122696 | SLC25A51   | 9  | 37879400  | 37904353  | protein_coding | 3,37 | 0 |
| ENSG00000111790 | FGFR1OP2   | 12 | 26938383  | 26966650  | protein_coding | 3,37 | 0 |
| ENSG00000156232 | WHAMM      | 15 | 82809628  | 82836108  | protein_coding | 3,37 | 0 |
| ENSG00000167881 | SRP68      | 17 | 76038775  | 76072653  | protein_coding | 3,36 | 0 |
| ENSG00000164506 | STXBP5     | 6  | 147204425 | 147390476 | protein_coding | 3,36 | 0 |
| ENSG00000147649 | MTDH       | 8  | 97644179  | 97728770  | protein_coding | 3,35 | 0 |
| ENSG00000159023 | EPB41      | 1  | 28887091  | 29120046  | protein_coding | 3,35 | 0 |
| ENSG00000081087 | OSTM1      | 6  | 108041409 | 108165854 | protein_coding | 3,35 | 0 |
| ENSG00000066739 | ATG2B      | 14 | 96279202  | 96363870  | protein_coding | 3,34 | 0 |
| ENSG00000136891 | TEX10      | 9  | 100302077 | 100352939 | protein_coding | 3,34 | 0 |
| ENSG00000104450 | SPAG1      | 8  | 100157906 | 100259278 | protein_coding | 3,34 | 0 |
| ENSG00000153956 | CACNA2D1   | 7  | 81946444  | 82443798  | protein_coding | 3,33 | 0 |
| ENSG00000179152 | TCAIM      | 3  | 44338119  | 44409451  | protein_coding | 3,33 | 0 |
| ENSG00000085185 | BCORL1     | X  | 129981107 | 130058083 | protein_coding | 3,33 | 0 |
| ENSG00000197566 | ZNF624     | 17 | 16620737  | 16653856  | protein_coding | 3,33 | 0 |
| ENSG00000138593 | SECISBP2L  | 15 | 48988476  | 49046563  | protein_coding | 3,32 | 0 |
| ENSG00000175792 | RUVBL1     | 3  | 128064778 | 128153914 | protein_coding | 3,32 | 0 |
| ENSG00000141298 | SSH2       | 17 | 29625938  | 29930276  | protein_coding | 3,32 | 0 |
| ENSG00000156531 | PHF6       | X  | 134373253 | 134428791 | protein_coding | 3,32 | 0 |
| ENSG00000112977 | DAP        | 5  | 10679230  | 10761272  | protein_coding | 3,31 | 0 |
| ENSG00000168385 | 09/01/2002 | 2  | 241315100 | 241354027 | protein_coding | 3,31 | 0 |

|                 |           |    |           |           |                |      |   |
|-----------------|-----------|----|-----------|-----------|----------------|------|---|
| ENSG00000133119 | RFC3      | 13 | 33818049  | 33966558  | protein_coding | 3,31 | 0 |
| ENSG00000008952 | SEC62     | 3  | 169966635 | 169998373 | protein_coding | 3,31 | 0 |
| ENSG00000197951 | ZNF71     | 19 | 56595264  | 56626481  | protein_coding | 3,31 | 0 |
| ENSG00000133059 | DSTYK     | 1  | 205142505 | 205211566 | protein_coding | 3,31 | 0 |
| ENSG00000083123 | BCKDHB    | 6  | 80106647  | 80346270  | protein_coding | 3,30 | 0 |
| ENSG00000062282 | DGAT2     | 11 | 75759512  | 75801535  | protein_coding | 3,30 | 0 |
| ENSG00000140199 | SLC12A6   | 15 | 34229996  | 34338060  | protein_coding | 3,30 | 0 |
| ENSG00000115365 | LANCL1    | 2  | 210431249 | 210477652 | protein_coding | 3,30 | 0 |
| ENSG00000104894 | CD37      | 19 | 49335171  | 49343335  | protein_coding | 3,29 | 0 |
| ENSG00000179562 | GCC1      | 7  | 127580618 | 127593611 | protein_coding | 3,29 | 0 |
| ENSG00000147251 | DOCK11    | X  | 118495898 | 118686163 | protein_coding | 3,28 | 0 |
| ENSG00000100335 | MIEF1     | 22 | 39499432  | 39518132  | protein_coding | 3,28 | 0 |
| ENSG00000116747 | TROVE2    | 1  | 193059422 | 193091777 | protein_coding | 3,28 | 0 |
| ENSG00000052723 | SIKE1     | 1  | 114769479 | 114780685 | protein_coding | 3,28 | 0 |
| ENSG00000156802 | ATAD2     | 8  | 123319850 | 123416350 | protein_coding | 3,27 | 0 |
| ENSG00000111696 | NT5DC3    | 12 | 103770453 | 103841197 | protein_coding | 3,27 | 0 |
| ENSG00000138411 | HECW2     | 2  | 196194370 | 196593692 | protein_coding | 3,27 | 0 |
| ENSG00000106771 | TMEM245   | 9  | 109015152 | 109119945 | protein_coding | 3,27 | 0 |
| ENSG00000254986 | DPP3      | 11 | 66480013  | 66509657  | protein_coding | 3,27 | 0 |
| ENSG00000144736 | SHQ1      | 3  | 72749277  | 72861914  | protein_coding | 3,26 | 0 |
| ENSG00000111670 | GNPTAB    | 12 | 101745497 | 101830938 | protein_coding | 3,26 | 0 |
| ENSG00000103769 | RAB11A    | 15 | 65726054  | 65891991  | protein_coding | 3,26 | 0 |
| ENSG00000171777 | RASGRP4   | 19 | 38409051  | 38426305  | protein_coding | 3,25 | 0 |
| ENSG00000122335 | SERAC1    | 6  | 158109515 | 158168270 | protein_coding | 3,25 | 0 |
| ENSG00000136451 | VEZF1     | 17 | 57971547  | 57988259  | protein_coding | 3,25 | 0 |
| ENSG00000106070 | GRB10     | 7  | 50590063  | 50793462  | protein_coding | 3,25 | 0 |
| ENSG00000143850 | PLEKHA6   | 1  | 204218851 | 204377665 | protein_coding | 3,25 | 0 |
| ENSG00000103888 | CEMIP     | 15 | 80779343  | 80951776  | protein_coding | 3,25 | 0 |
| ENSG00000152492 | CCDC50    | 3  | 191329077 | 191398670 | protein_coding | 3,25 | 0 |
| ENSG00000114544 | SLC41A3   | 3  | 126006355 | 126101561 | protein_coding | 3,25 | 0 |
| ENSG00000078369 | GNB1      | 1  | 1785285   | 1891117   | protein_coding | 3,24 | 0 |
| ENSG00000143374 | TARS2     | 1  | 150487364 | 150507609 | protein_coding | 3,24 | 0 |
| ENSG00000113851 | CRBN      | 3  | 3148992   | 3179710   | protein_coding | 3,23 | 0 |
| ENSG00000214367 | HAUS3     | 4  | 2227464   | 2242164   | protein_coding | 3,23 | 0 |
| ENSG00000181467 | RAP2B     | 3  | 153162270 | 153167173 | protein_coding | 3,23 | 0 |
| ENSG00000135541 | AHI1      | 6  | 135283532 | 135497776 | protein_coding | 3,23 | 0 |
| ENSG00000149313 | AASDHPPT  | 11 | 106075501 | 106098710 | protein_coding | 3,23 | 0 |
| ENSG00000154265 | ABCA5     | 17 | 69244311  | 69327244  | protein_coding | 3,22 | 0 |
| ENSG00000203814 | HIST2H2BF | 1  | 149782689 | 149812373 | protein_coding | 3,22 | 0 |
| ENSG00000108262 | GIT1      | 17 | 29573469  | 29594054  | protein_coding | 3,21 | 0 |
| ENSG00000146350 | TBC1D32   | 6  | 121079494 | 121334745 | protein_coding | 3,21 | 0 |
| ENSG00000183605 | SFXN4     | 10 | 119140767 | 119165667 | protein_coding | 3,20 | 0 |
| ENSG00000172399 | MYOZ2     | 4  | 119135784 | 119187789 | protein_coding | 3,20 | 0 |
| ENSG00000143742 | SRP9      | 1  | 225777813 | 225790466 | protein_coding | 3,18 | 0 |
| ENSG00000115840 | SLC25A12  | 2  | 171784370 | 171999859 | protein_coding | 3,18 | 0 |
| ENSG00000140575 | IQGAP1    | 15 | 90388218  | 90502243  | protein_coding | 3,17 | 0 |
| ENSG00000198373 | WWP2      | 16 | 69762306  | 69941741  | protein_coding | 3,17 | 0 |
| ENSG00000117475 | BLZF1     | 1  | 169367970 | 169396540 | protein_coding | 3,17 | 0 |
| ENSG00000011523 | CEP68     | 2  | 65056366  | 65087004  | protein_coding | 3,17 | 0 |
| ENSG00000091592 | NLRP1     | 17 | 5499427   | 5619424   | protein_coding | 3,17 | 0 |
| ENSG00000137992 | DBT       | 1  | 100186919 | 100249834 | protein_coding | 3,16 | 0 |
| ENSG00000152102 | FAM168B   | 2  | 131047876 | 131093460 | protein_coding | 3,16 | 0 |
| ENSG00000237765 | FAM200B   | 4  | 15681662  | 15705565  | protein_coding | 3,16 | 0 |
| ENSG00000138381 | ASNSD1    | 2  | 189661385 | 189670831 | protein_coding | 3,16 | 0 |
| ENSG00000167767 | KRT80     | 12 | 52168996  | 52192000  | protein_coding | 3,16 | 0 |
| ENSG00000143970 | ASXL2     | 2  | 25733753  | 25878516  | protein_coding | 3,15 | 0 |
| ENSG00000160746 | ANO10     | 3  | 43354859  | 43691594  | protein_coding | 3,15 | 0 |
| ENSG00000121481 | RNF2      | 1  | 185045364 | 185102608 | protein_coding | 3,14 | 0 |

|                 |          |    |           |           |                |      |   |
|-----------------|----------|----|-----------|-----------|----------------|------|---|
| ENSG00000112996 | MRPS30   | 5  | 44808925  | 44820428  | protein_coding | 3,14 | 0 |
| ENSG00000145414 | NAF1     | 4  | 163110073 | 163166921 | protein_coding | 3,14 | 0 |
| ENSG00000100364 | KIAA0930 | 22 | 45190338  | 45240769  | protein_coding | 3,14 | 0 |
| ENSG00000188827 | SLX4     | 16 | 3581181   | 3611598   | protein_coding | 3,14 | 0 |
| ENSG00000114978 | MOB1A    | 2  | 74152528  | 74178898  | protein_coding | 3,13 | 0 |
| ENSG00000124575 | HIST1H1D | 6  | 26234268  | 26234933  | protein_coding | 3,13 | 0 |
| ENSG00000143458 | GABPB2   | 1  | 151070578 | 151125542 | protein_coding | 3,13 | 0 |
| ENSG00000142208 | AKT1     | 14 | 104769349 | 104795751 | protein_coding | 3,13 | 0 |
| ENSG00000164944 | KIAA1429 | 8  | 94487693  | 94553529  | protein_coding | 3,12 | 0 |
| ENSG00000139174 | PRICKLE1 | 12 | 42456754  | 42590355  | protein_coding | 3,12 | 0 |
| ENSG00000104643 | MTMR9    | 8  | 11284416  | 11328146  | protein_coding | 3,12 | 0 |
| ENSG00000051825 | MPHOSPH9 | 12 | 123152320 | 123244014 | protein_coding | 3,11 | 0 |
| ENSG00000115266 | APC2     | 19 | 1446302   | 1473244   | protein_coding | 3,11 | 0 |
| ENSG00000188994 | ZNF292   | 6  | 87152833  | 87264196  | protein_coding | 3,11 | 0 |
| ENSG00000168795 | ZBTB5    | 9  | 37438114  | 37465399  | protein_coding | 3,11 | 0 |
| ENSG00000198863 | RUNDC1   | 17 | 42980565  | 42993690  | protein_coding | 3,11 | 0 |
| ENSG00000166479 | TMX3     | 18 | 68673688  | 68715298  | protein_coding | 3,10 | 0 |
| ENSG00000163285 | GABRG1   | 4  | 46035769  | 46124081  | protein_coding | 3,10 | 0 |
| ENSG00000186073 | C15orf41 | 15 | 36579611  | 36810248  | protein_coding | 3,09 | 0 |
| ENSG00000134186 | PRPF38B  | 1  | 108692323 | 108701803 | protein_coding | 3,09 | 0 |
| ENSG00000174953 | DHX36    | 3  | 154272546 | 154324497 | protein_coding | 3,08 | 0 |
| ENSG00000138756 | BMP2K    | 4  | 78776342  | 78916372  | protein_coding | 3,08 | 0 |
| ENSG00000166454 | ATMIN    | 16 | 81035847  | 81047358  | protein_coding | 3,08 | 0 |
| ENSG00000120063 | GNA13    | 17 | 65010715  | 65056839  | protein_coding | 3,07 | 0 |
| ENSG00000182134 | TDRKH    | 1  | 151770107 | 151791416 | protein_coding | 3,07 | 0 |
| ENSG00000169989 | TIGD4    | 4  | 152769354 | 152779764 | protein_coding | 3,06 | 0 |
| ENSG00000102763 | VWA8     | 13 | 41566837  | 41961120  | protein_coding | 3,06 | 0 |
| ENSG00000166889 | PATL1    | 11 | 59636716  | 59668980  | protein_coding | 3,06 | 0 |
| ENSG00000163939 | PBRM1    | 3  | 52545352  | 52685917  | protein_coding | 3,05 | 0 |
| ENSG00000064199 | SPA17    | 11 | 124673798 | 124697518 | protein_coding | 3,05 | 0 |
| ENSG00000129515 | SNX6     | 14 | 34561094  | 34630183  | protein_coding | 3,05 | 0 |
| ENSG00000110075 | PPP6R3   | 11 | 68460731  | 68615334  | protein_coding | 3,04 | 0 |
| ENSG00000116685 | KIAA2013 | 1  | 11919591  | 11926428  | protein_coding | 3,04 | 0 |
| ENSG00000140548 | ZNF710   | 15 | 90001392  | 90082206  | protein_coding | 3,04 | 0 |
| ENSG00000119636 | BBOF1    | 14 | 74019353  | 74082863  | protein_coding | 3,03 | 0 |
| ENSG00000131504 | DIAPH1   | 5  | 141515016 | 141619055 | protein_coding | 3,02 | 0 |
| ENSG00000121440 | PDZRN3   | 3  | 73382433  | 73624940  | protein_coding | 3,02 | 0 |
| ENSG00000136021 | SCYL2    | 12 | 100267140 | 100341724 | protein_coding | 3,02 | 0 |
| ENSG00000119321 | FKBP15   | 9  | 113161006 | 113221361 | protein_coding | 3,01 | 0 |
| ENSG00000115568 | ZNF142   | 2  | 218637916 | 218659655 | protein_coding | 3,01 | 0 |
| ENSG00000019995 | ZRANB1   | 10 | 124942123 | 124988189 | protein_coding | 3,00 | 0 |
| ENSG00000196350 | ZNF729   | 19 | 22286408  | 22317176  | protein_coding | 3,00 | 0 |
| ENSG00000175426 | PCSK1    | 5  | 96390415  | 96434143  | protein_coding | 3,00 | 0 |
| ENSG00000138685 | FGF2     | 4  | 122826708 | 122898236 | protein_coding | 3,00 | 0 |
| ENSG00000178385 | PLEKHM3  | 2  | 207828303 | 208025560 | protein_coding | 2,99 | 0 |
| ENSG00000163697 | APBB2    | 4  | 40810027  | 41216714  | protein_coding | 2,99 | 0 |
| ENSG00000115998 | C2orf42  | 2  | 70149880  | 70248615  | protein_coding | 2,98 | 0 |
| ENSG00000118217 | ATF6     | 1  | 161766294 | 161964070 | protein_coding | 2,98 | 0 |
| ENSG00000005175 | RPAP3    | 12 | 47661249  | 47706061  | protein_coding | 2,96 | 0 |
| ENSG00000100697 | DICER1   | 14 | 95086228  | 95158010  | protein_coding | 2,96 | 0 |
| ENSG00000133114 | GPALPP1  | 13 | 44989529  | 45037669  | protein_coding | 2,96 | 0 |
| ENSG00000152457 | DCLRE1C  | 10 | 14897359  | 14954432  | protein_coding | 2,94 | 0 |
| ENSG00000103479 | RBL2     | 16 | 53433977  | 53491649  | protein_coding | 2,94 | 0 |
| ENSG00000029725 | RABEP1   | 17 | 5282265   | 5385812   | protein_coding | 2,93 | 0 |
| ENSG00000100462 | PRMT5    | 14 | 22920511  | 22929585  | protein_coding | 2,93 | 0 |
| ENSG00000136040 | PLXNC1   | 12 | 94148723  | 94307675  | protein_coding | 2,93 | 0 |
| ENSG00000084733 | RAB10    | 2  | 26034107  | 26137454  | protein_coding | 2,93 | 0 |
| ENSG00000151376 | ME3      | 11 | 86441108  | 86672636  | protein_coding | 2,93 | 0 |

|                 |             |    |           |           |                |      |   |
|-----------------|-------------|----|-----------|-----------|----------------|------|---|
| ENSG00000145390 | USP53       | 4  | 119212587 | 119295517 | protein_coding | 2,92 | 0 |
| ENSG00000198053 | SIRPA       | 20 | 1894167   | 1940592   | protein_coding | 2,92 | 0 |
| ENSG00000069966 | GNB5        | 15 | 52115105  | 52191369  | protein_coding | 2,92 | 0 |
| ENSG00000160218 | TRAPPC10    | 21 | 44012319  | 44106552  | protein_coding | 2,92 | 0 |
| ENSG00000124198 | ARFGEF2     | 20 | 48921890  | 49036693  | protein_coding | 2,91 | 0 |
| ENSG00000136169 | SETDB2      | 13 | 49444374  | 49495003  | protein_coding | 2,91 | 0 |
| ENSG00000103811 | CTSH        | 15 | 78921058  | 78949574  | protein_coding | 2,90 | 0 |
| ENSG00000119927 | GPAM        | 10 | 112149864 | 112215377 | protein_coding | 2,90 | 0 |
| ENSG00000187325 | TAF9B       | X  | 78129748  | 78139706  | protein_coding | 2,90 | 0 |
| ENSG00000105514 | RAB3D       | 19 | 11322046  | 11346270  | protein_coding | 2,90 | 0 |
| ENSG00000127946 | HIP1        | 7  | 75533300  | 75738962  | protein_coding | 2,90 | 0 |
| ENSG00000148110 | HIATL1      | 9  | 94374551  | 94461042  | protein_coding | 2,90 | 0 |
| ENSG00000147164 | SNX12       | X  | 71056332  | 71073426  | protein_coding | 2,89 | 0 |
| ENSG00000081665 | ZNF506      | 19 | 19785839  | 19821751  | protein_coding | 2,89 | 0 |
| ENSG00000083642 | PDS5B       | 13 | 32586427  | 32778019  | protein_coding | 2,89 | 0 |
| ENSG00000121390 | PSPC1       | 13 | 19674752  | 19783019  | protein_coding | 2,89 | 0 |
| ENSG00000032742 | IFT88       | 13 | 20567069  | 20691437  | protein_coding | 2,89 | 0 |
| ENSG00000161813 | LARP4       | 12 | 50392383  | 50480004  | protein_coding | 2,88 | 0 |
| ENSG00000132294 | EFR3A       | 8  | 131904088 | 132013642 | protein_coding | 2,88 | 0 |
| ENSG00000061987 | MON2        | 12 | 62466817  | 62600479  | protein_coding | 2,87 | 0 |
| ENSG00000145675 | PIK3R1      | 5  | 68215720  | 68301821  | protein_coding | 2,87 | 0 |
| ENSG00000130939 | UBE4B       | 1  | 10032832  | 10181239  | protein_coding | 2,87 | 0 |
| ENSG00000197050 | ZNF420      | 19 | 37007857  | 37130314  | protein_coding | 2,87 | 0 |
| ENSG00000124486 | USP9X       | X  | 41085635  | 41236579  | protein_coding | 2,85 | 0 |
| ENSG00000245680 | ZNF585B     | 19 | 37181579  | 37218153  | protein_coding | 2,84 | 0 |
| ENSG00000115524 | SF3B1       | 2  | 197389784 | 197435091 | protein_coding | 2,84 | 0 |
| ENSG00000168778 | TCTN2       | 12 | 123671113 | 123708403 | protein_coding | 2,83 | 0 |
| ENSG00000120333 | MRPS14      | 1  | 175010789 | 175023425 | protein_coding | 2,83 | 0 |
| ENSG00000254685 | FPGT        | 1  | 74198212  | 74234086  | protein_coding | 2,82 | 0 |
| ENSG00000115942 | ORC2        | 2  | 200908973 | 200963680 | protein_coding | 2,81 | 0 |
| ENSG00000248919 | ATP5J2-PTC1 | 7  | 99419749  | 99466197  | protein_coding | 2,81 | 0 |
| ENSG00000136867 | SLC31A2     | 9  | 113150942 | 113164137 | protein_coding | 2,81 | 0 |
| ENSG00000157106 | SMG1        | 16 | 18804853  | 18926454  | protein_coding | 2,80 | 0 |
| ENSG00000126773 | PCNXL4      | 14 | 60091911  | 60169133  | protein_coding | 2,79 | 0 |
| ENSG00000082146 | STRADB      | 2  | 201387858 | 201480846 | protein_coding | 2,79 | 0 |
| ENSG00000075568 | TMEM131     | 2  | 97756333  | 97995891  | protein_coding | 2,79 | 0 |
| ENSG00000136536 | 07-mars     | 2  | 159712457 | 159771027 | protein_coding | 2,78 | 0 |
| ENSG00000156521 | TYSND1      | 10 | 70137981  | 70146676  | protein_coding | 2,77 | 0 |
| ENSG00000146414 | SHPRH       | 6  | 145864245 | 145964423 | protein_coding | 2,77 | 0 |
| ENSG00000064313 | TAF2        | 8  | 119730775 | 119832863 | protein_coding | 2,77 | 0 |
| ENSG00000150867 | PIP4K2A     | 10 | 22534849  | 22714555  | protein_coding | 2,77 | 0 |
| ENSG00000084093 | REST        | 4  | 56907876  | 56935844  | protein_coding | 2,77 | 0 |
| ENSG00000198146 | ZNF770      | 15 | 34978341  | 34988287  | protein_coding | 2,76 | 0 |
| ENSG00000085982 | USP40       | 2  | 233475520 | 233566782 | protein_coding | 2,76 | 0 |
| ENSG00000114331 | ACAP2       | 3  | 195274736 | 195443078 | protein_coding | 2,75 | 0 |
| ENSG00000253797 | UTP14C      | 13 | 52024691  | 52033600  | protein_coding | 2,75 | 0 |
| ENSG00000023287 | RB1CC1      | 8  | 52622456  | 52745843  | protein_coding | 2,74 | 0 |
| ENSG00000144426 | NBEAL1      | 2  | 203014879 | 203226378 | protein_coding | 2,73 | 0 |
| ENSG00000160551 | TAOK1       | 17 | 29390464  | 29551904  | protein_coding | 2,73 | 0 |
| ENSG00000152240 | HAUS1       | 18 | 46104332  | 46128333  | protein_coding | 2,73 | 0 |
| ENSG00000212916 | MAP10       | 1  | 232804892 | 232808407 | protein_coding | 2,73 | 0 |
| ENSG00000101337 | TM9SF4      | 20 | 32109506  | 32167258  | protein_coding | 2,72 | 0 |
| ENSG00000171723 | GPHN        | 14 | 66507407  | 67181803  | protein_coding | 2,72 | 0 |
| ENSG00000100393 | EP300       | 22 | 41091786  | 41180079  | protein_coding | 2,71 | 0 |
| ENSG00000131149 | GSE1        | 16 | 85611409  | 85676204  | protein_coding | 2,70 | 0 |
| ENSG00000221910 | OR2F2       | 7  | 143935166 | 143936279 | protein_coding | 2,70 | 0 |
| ENSG00000170190 | SLC16A5     | 17 | 75087727  | 75106162  | protein_coding | 2,69 | 0 |
| ENSG00000088387 | DOCK9       | 13 | 98793487  | 99086625  | protein_coding | 2,69 | 0 |



|                 |            |    |           |           |                |      |   |
|-----------------|------------|----|-----------|-----------|----------------|------|---|
| ENSG00000168936 | TMEM129    | 4  | 1715952   | 1721358   | protein_coding | 2,69 | 0 |
| ENSG00000109171 | SLAIN2     | 4  | 48341322  | 48426212  | protein_coding | 2,68 | 0 |
| ENSG00000123066 | MED13L     | 12 | 115953872 | 116277338 | protein_coding | 2,67 | 0 |
| ENSG00000034677 | RNF19A     | 8  | 100257059 | 100410015 | protein_coding | 2,67 | 0 |
| ENSG00000107518 | ATRNL1     | 10 | 115093365 | 115948992 | protein_coding | 2,66 | 0 |
| ENSG00000124789 | NUP153     | 6  | 17615035  | 17706834  | protein_coding | 2,66 | 0 |
| ENSG00000169891 | REPS2      | X  | 16946691  | 17153280  | protein_coding | 2,66 | 0 |
| ENSG00000197008 | ZNF138     | 7  | 64794388  | 64833681  | protein_coding | 2,66 | 0 |
| ENSG00000258102 | MAP1LC3B2  | 12 | 116548105 | 116576448 | protein_coding | 2,65 | 0 |
| ENSG00000115839 | RAB3GAP1   | 2  | 135052265 | 135176394 | protein_coding | 2,64 | 0 |
| ENSG00000147133 | TAF1       | X  | 71366239  | 71532374  | protein_coding | 2,63 | 0 |
| ENSG00000251369 | ZNF550     | 19 | 57535257  | 57559863  | protein_coding | 2,62 | 0 |
| ENSG00000070778 | PTPN21     | 14 | 88465778  | 88554733  | protein_coding | 2,62 | 0 |
| ENSG00000145715 | RASA1      | 5  | 87267888  | 87391931  | protein_coding | 2,61 | 0 |
| ENSG00000145555 | MYO10      | 5  | 16661914  | 16936276  | protein_coding | 2,61 | 0 |
| ENSG00000113296 | THBS4      | 5  | 79991311  | 80083287  | protein_coding | 2,60 | 0 |
| ENSG00000162927 | PUS10      | 2  | 60940222  | 61018259  | protein_coding | 2,60 | 0 |
| ENSG00000187164 | SHTN1      | 10 | 116881482 | 117126586 | protein_coding | 2,60 | 0 |
| ENSG00000178338 | ZNF354B    | 5  | 178859953 | 178888122 | protein_coding | 2,60 | 0 |
| ENSG00000126883 | NUP214     | 9  | 131125561 | 131234670 | protein_coding | 2,60 | 0 |
| ENSG00000078070 | MCCC1      | 3  | 183015218 | 183116075 | protein_coding | 2,59 | 0 |
| ENSG00000134954 | ETS1       | 11 | 128458761 | 128587558 | protein_coding | 2,59 | 0 |
| ENSG00000253251 | ENSG000002 | 5  | 65624765  | 65630891  | protein_coding | 2,59 | 0 |
| ENSG00000269556 | TMEM185A   | X  | 149596556 | 149631912 | protein_coding | 2,58 | 0 |
| ENSG00000163322 | FAM175A    | 4  | 83459517  | 83523348  | protein_coding | 2,58 | 0 |
| ENSG00000164163 | ABCE1      | 4  | 145097932 | 145129179 | protein_coding | 2,58 | 0 |
| ENSG00000061337 | LZTS1      | 8  | 20246165  | 20303963  | protein_coding | 2,58 | 0 |
| ENSG00000103994 | ZNF106     | 15 | 42412823  | 42491123  | protein_coding | 2,57 | 0 |
| ENSG00000144712 | CAND2      | 3  | 12796472  | 12871916  | protein_coding | 2,57 | 0 |
| ENSG00000198919 | DZIP3      | 3  | 108589682 | 108694846 | protein_coding | 2,57 | 0 |
| ENSG00000101901 | ALG13      | X  | 111665811 | 111760649 | protein_coding | 2,56 | 0 |
| ENSG00000050748 | MAPK9      | 5  | 180233143 | 180292099 | protein_coding | 2,56 | 0 |
| ENSG00000227124 | ZNF717     | 3  | 75709643  | 75785583  | protein_coding | 2,56 | 0 |
| ENSG00000028116 | VRK2       | 2  | 57907651  | 58159920  | protein_coding | 2,56 | 0 |
| ENSG00000136051 | KIAA1033   | 12 | 105107324 | 105169134 | protein_coding | 2,56 | 0 |
| ENSG00000159873 | CCDC117    | 22 | 28772674  | 28789301  | protein_coding | 2,56 | 0 |
| ENSG00000135018 | UBQLN1     | 9  | 83659963  | 83708203  | protein_coding | 2,55 | 0 |
| ENSG00000154305 | MIA3       | 1  | 222618086 | 222668012 | protein_coding | 2,55 | 0 |
| ENSG00000070367 | EXOC5      | 14 | 57200507  | 57269008  | protein_coding | 2,54 | 0 |
| ENSG00000178537 | SLC25A20   | 3  | 48856931  | 48898993  | protein_coding | 2,53 | 0 |
| ENSG00000100503 | NIN        | 14 | 50719763  | 50831121  | protein_coding | 2,53 | 0 |
| ENSG00000121957 | GPSM2      | 1  | 108875350 | 108934545 | protein_coding | 2,53 | 0 |
| ENSG00000089159 | PXN        | 12 | 120210439 | 120265771 | protein_coding | 2,53 | 0 |
| ENSG00000172493 | AFF1       | 4  | 86935002  | 87141054  | protein_coding | 2,52 | 0 |
| ENSG00000092820 | EZR        | 6  | 158765741 | 158819412 | protein_coding | 2,51 | 0 |
| ENSG00000158186 | MRAS       | 3  | 138347648 | 138405534 | protein_coding | 2,51 | 0 |
| ENSG00000143442 | POGZ       | 1  | 151402724 | 151459465 | protein_coding | 2,51 | 0 |
| ENSG00000174796 | THAP6      | 4  | 75513946  | 75550473  | protein_coding | 2,50 | 0 |
| ENSG00000125945 | ZNF436     | 1  | 23359448  | 23369442  | protein_coding | 2,50 | 0 |
| ENSG00000197535 | MYO5A      | 15 | 52307283  | 52529050  | protein_coding | 2,50 | 0 |
| ENSG00000115306 | SPTBN1     | 2  | 54456285  | 54671445  | protein_coding | 2,49 | 0 |
| ENSG00000164494 | PDSS2      | 6  | 107152557 | 107459564 | protein_coding | 2,49 | 0 |
| ENSG00000139197 | PEX5       | 12 | 7188685   | 7218574   | protein_coding | 2,48 | 0 |
| ENSG00000085365 | SCAMP1     | 5  | 78360583  | 78479071  | protein_coding | 2,48 | 0 |
| ENSG00000176222 | ZNF404     | 19 | 43872363  | 43901385  | protein_coding | 2,47 | 0 |
| ENSG00000263956 | NBPF11     | 1  | 148102046 | 148152322 | protein_coding | 2,47 | 0 |
| ENSG00000048649 | RSF1       | 11 | 77659996  | 77821017  | protein_coding | 2,47 | 0 |
| ENSG00000169519 | METTL15    | 11 | 28108248  | 28527041  | protein_coding | 2,46 | 0 |

|                 |           |    |           |           |                |      |   |
|-----------------|-----------|----|-----------|-----------|----------------|------|---|
| ENSG00000198399 | ITSN2     | 2  | 24202864  | 24360714  | protein_coding | 2,46 | 0 |
| ENSG00000117625 | RCOR3     | 1  | 211258377 | 211316385 | protein_coding | 2,46 | 0 |
| ENSG00000198093 | ZNF649    | 19 | 51889224  | 51905040  | protein_coding | 2,45 | 0 |
| ENSG00000175029 | CTBP2     | 10 | 124984317 | 125161170 | protein_coding | 2,45 | 0 |
| ENSG00000115966 | ATF2      | 2  | 175072250 | 175168382 | protein_coding | 2,44 | 0 |
| ENSG00000110768 | GTF2H1    | 11 | 18322295  | 18367044  | protein_coding | 2,44 | 0 |
| ENSG00000146950 | SHROOM2   | X  | 9786456   | 9949443   | protein_coding | 2,43 | 0 |
| ENSG00000003393 | ALS2      | 2  | 201700554 | 201781189 | protein_coding | 2,43 | 0 |
| ENSG00000100426 | ZBED4     | 22 | 49853842  | 49890078  | protein_coding | 2,43 | 0 |
| ENSG00000119401 | TRIM32    | 9  | 116687302 | 116701300 | protein_coding | 2,43 | 0 |
| ENSG00000170456 | DENND5B   | 12 | 31382223  | 31591097  | protein_coding | 2,43 | 0 |
| ENSG00000196670 | ZFP62     | 5  | 180847611 | 180861285 | protein_coding | 2,43 | 0 |
| ENSG00000163959 | SLC51A    | 3  | 196211487 | 196243178 | protein_coding | 2,42 | 0 |
| ENSG00000169826 | CSGALNACT | 10 | 43138486  | 43185308  | protein_coding | 2,41 | 0 |
| ENSG00000127980 | PEX1      | 7  | 92487020  | 92528531  | protein_coding | 2,41 | 0 |
| ENSG00000138796 | HADH      | 4  | 107989714 | 108035175 | protein_coding | 2,41 | 0 |
| ENSG00000154721 | JAM2      | 21 | 25639272  | 25717562  | protein_coding | 2,41 | 0 |
| ENSG00000004487 | KDM1A     | 1  | 23019448  | 23083689  | protein_coding | 2,40 | 0 |
| ENSG00000094975 | SUCO      | 1  | 172532349 | 172611833 | protein_coding | 2,39 | 0 |
| ENSG00000143207 | RFWD2     | 1  | 175944831 | 176207493 | protein_coding | 2,39 | 0 |
| ENSG00000115760 | BIRC6     | 2  | 32357028  | 32618899  | protein_coding | 2,37 | 0 |
| ENSG00000154174 | TOMM70A   | 3  | 100363431 | 100401398 | protein_coding | 2,37 | 0 |
| ENSG00000196712 | NF1       | 17 | 31094927  | 31382116  | protein_coding | 2,36 | 0 |
| ENSG00000072501 | SMC1A     | X  | 53374149  | 53422728  | protein_coding | 2,34 | 0 |
| ENSG00000085224 | ATRX      | X  | 77504878  | 77786269  | protein_coding | 2,31 | 0 |
| ENSG00000153827 | TRIP12    | 2  | 229763838 | 229923239 | protein_coding | 2,31 | 0 |
| ENSG00000116675 | DNAJC6    | 1  | 65248219  | 65415869  | protein_coding | 2,31 | 0 |
| ENSG00000118260 | CREB1     | 2  | 207529737 | 207603431 | protein_coding | 2,29 | 0 |
| ENSG00000138138 | ATAD1     | 10 | 87751512  | 87841343  | protein_coding | 2,28 | 0 |
| ENSG00000133739 | LRRCC1    | 8  | 85107147  | 85146076  | protein_coding | 2,28 | 0 |
| ENSG00000143493 | INTS7     | 1  | 211940399 | 212035542 | protein_coding | 2,28 | 0 |
| ENSG00000112367 | FIG4      | 6  | 109691312 | 109825428 | protein_coding | 2,28 | 0 |
| ENSG00000175455 | CCDC14    | 3  | 123897305 | 123961408 | protein_coding | 2,27 | 0 |
| ENSG00000163964 | PIGX      | 3  | 196639775 | 196736007 | protein_coding | 2,24 | 0 |
| ENSG00000213079 | SCAF8     | 6  | 154733325 | 154834244 | protein_coding | 2,23 | 0 |
| ENSG00000116984 | MTR       | 1  | 236795281 | 236903981 | protein_coding | 2,22 | 0 |
| ENSG00000120868 | APAF1     | 12 | 98645141  | 98735433  | protein_coding | 2,21 | 0 |
| ENSG00000135837 | CEP350    | 1  | 179954738 | 180114880 | protein_coding | 2,21 | 0 |
| ENSG00000132953 | XPO4      | 13 | 20777329  | 20903048  | protein_coding | 2,21 | 0 |
| ENSG00000113658 | SMAD5     | 5  | 136132845 | 136188747 | protein_coding | 2,21 | 0 |
| ENSG00000099290 | FAM21A    | 10 | 50067888  | 50133506  | protein_coding | 2,20 | 0 |
| ENSG00000101310 | SEC23B    | 20 | 18507493  | 18561415  | protein_coding | 2,20 | 0 |
| ENSG00000180815 | MAP3K15   | X  | 19360056  | 19515261  | protein_coding | 2,20 | 0 |
| ENSG00000124207 | CSE1L     | 20 | 49046246  | 49096960  | protein_coding | 2,20 | 0 |
| ENSG00000155313 | USP25     | 21 | 15730025  | 15880069  | protein_coding | 2,18 | 0 |
| ENSG00000196505 | GDAP2     | 1  | 117863485 | 117929630 | protein_coding | 2,17 | 0 |
| ENSG00000143776 | CDC42BPA  | 1  | 226989865 | 227318474 | protein_coding | 2,17 | 0 |
| ENSG00000171928 | TVP23B    | 17 | 18780995  | 18806714  | protein_coding | 2,17 | 0 |
| ENSG00000113569 | NUP155    | 5  | 37288137  | 37371181  | protein_coding | 2,12 | 0 |
| ENSG00000183495 | EP400     | 12 | 131949920 | 132081102 | protein_coding | 2,12 | 0 |
| ENSG00000171681 | ATF7IP    | 12 | 14365632  | 14502935  | protein_coding | 2,11 | 0 |
| ENSG00000103657 | HERC1     | 15 | 63608618  | 63833942  | protein_coding | 2,10 | 0 |
| ENSG00000154727 | GABPA     | 21 | 25734570  | 25772460  | protein_coding | 2,10 | 0 |
| ENSG00000153832 | FBXO36    | 2  | 229922302 | 230013109 | protein_coding | 2,09 | 0 |
| ENSG00000105866 | SP4       | 7  | 21428034  | 21514822  | protein_coding | 2,08 | 0 |
| ENSG00000115355 | CCDC88A   | 2  | 55287842  | 55419921  | protein_coding | 2,08 | 0 |
| ENSG00000174718 | KIAA1551  | 12 | 31959370  | 31993107  | protein_coding | 2,03 | 0 |
| ENSG00000170949 | ZNF160    | 19 | 53066606  | 53103436  | protein_coding | 2,02 | 0 |

Supplementary Table S3: List of the 2,021 lncRNAs upregulated in MII oocytes

| Gene ID         | Gene Name       | Chrom | Start_position | End_position | Gene_biotype         | Fold Change | q-value(%) |
|-----------------|-----------------|-------|----------------|--------------|----------------------|-------------|------------|
| ENSG00000261812 | TUBB8P7         | 16    | 90093154       | 90096354     | transcribed_unproces | 71259,46    | 0          |
| ENSG00000214788 | OOSP1           | 11    | 59938455       | 59995845     | unitary_pseudogene   | 43555,92    | 0          |
| ENSG00000188831 | DPPA3P2         | 14    | 36371165       | 36372383     | transcribed_unproces | 24554,10    | 0          |
| ENSG00000214324 | C3orf56         | 3     | 127193131      | 127198185    | lincRNA              | 19086,80    | 0          |
| ENSG00000173213 | TUBB8P12        | 18    | 47390          | 49557        | transcribed_unproces | 18506,17    | 0          |
| ENSG00000251297 | TUBB7P          | 4     | 189982523      | 189984871    | unprocessed_pseudog  | 15447,50    | 0          |
| ENSG00000159247 | TUBBP5          | 9     | 138150075      | 138177433    | transcribed_unproces | 15149,50    | 0          |
| ENSG00000262117 | BCAR4           | 16    | 11819829       | 11828845     | lincRNA              | 14488,17    | 0          |
| ENSG00000184617 | ZNF840P         | 20    | 46484461       | 46492640     | unprocessed_pseudog  | 9756,20     | 0          |
| ENSG00000253585 | ENSG00000253585 | 8     | 94097764       | 94104322     | lincRNA              | 5380,60     | 0          |
| ENSG00000250447 | ENSG00000250447 | 5     | 53776644       | 53819686     | lincRNA              | 4265,50     | 0          |
| ENSG00000227154 | ENSG00000227154 | 6     | 35443044       | 35449866     | unprocessed_pseudog  | 4016,35     | 0          |
| ENSG00000256340 | ABCC6P1         | 16    | 18571162       | 18598328     | transcribed_unproces | 3521,40     | 0          |
| ENSG00000222005 | LINC01118       | 2     | 46816668       | 46822657     | lincRNA              | 3359,92     | 0          |
| ENSG00000229251 | HNRNPA1P8       | 7     | 84983556       | 84984506     | processed_pseudoger  | 3235,67     | 0          |
| ENSG00000250788 | TUBB8P4         | 12    | 34164773       | 34166954     | unprocessed_pseudog  | 2762,20     | 0          |
| ENSG00000262983 | ENSG00000262983 | 16    | 21194847       | 21205977     | antisense            | 2681,30     | 0          |
| ENSG00000257275 | ENSG00000257275 | 14    | 95711747       | 95757656     | antisense            | 2037,80     | 0          |
| ENSG00000231332 | OOEP-AS1        | 6     | 73369704       | 73387717     | antisense            | 1764,50     | 0          |
| ENSG00000213113 | TUBB8P8         | 3     | 198119721      | 198120778    | unprocessed_pseudog  | 1720,90     | 0          |
| ENSG00000228650 | ENSG00000228650 | 5     | 56770799       | 56772303     | lincRNA              | 1633,70     | 0          |
| ENSG00000280639 | ENSG00000280639 | 15    | 70570958       | 70586606     | lincRNA              | 1617,15     | 0          |
| ENSG00000258977 | LINC01467       | 14    | 81605347       | 81623061     | lincRNA              | 1487,40     | 0          |
| ENSG00000256039 | ENSG00000256039 | 12    | 10553363       | 10558049     | lincRNA              | 1377,73     | 0          |
| ENSG00000248571 | ENSG00000248571 | 4     | 152666368      | 152670107    | antisense            | 1176,70     | 0          |
| ENSG00000184608 | FAM167A-AS1     | 8     | 11368402       | 11438658     | processed_transcript | 1017,09     | 0          |
| ENSG00000229414 | KCNQ1-AS1       | 11    | 2840135        | 2861568      | antisense            | 982,73      | 0          |
| ENSG00000251218 | ENSG00000251218 | 8     | 134849935      | 134881899    | lincRNA              | 910,40      | 0          |
| ENSG00000218357 | ENSG00000218357 | 22    | 47461299       | 47487111     | lincRNA              | 897,70      | 0          |
| ENSG00000277738 | ENSG00000277738 | 12    | 91634887       | 91635644     | lincRNA              | 881,80      | 0          |
| ENSG00000228561 | ENSG00000228561 | 3     | 177683627      | 177691250    | lincRNA              | 865,60      | 0          |
| ENSG00000234711 | TUBB8P11        | 1     | 873292         | 874349       | unprocessed_pseudog  | 796,75      | 0          |
| ENSG00000228775 | WEE2-AS1        | 7     | 141704338      | 141738346    | antisense            | 720,47      | 0          |
| ENSG00000261713 | SSTR5-AS1       | 16    | 1064093        | 1078731      | processed_transcript | 698,60      | 0          |
| ENSG00000262921 | ENSG00000262921 | 17    | 4565752        | 4571760      | lincRNA              | 669,00      | 0          |
| ENSG00000237250 | ENSG00000237250 | 1     | 237862175      | 237928321    | antisense            | 666,00      | 0          |
| ENSG00000260734 | ENSG00000260734 | 16    | 71430262       | 71432282     | transcribed_unproces | 627,20      | 0          |
| ENSG00000250544 | ENSG00000250544 | 5     | 86746818       | 86749772     | lincRNA              | 619,18      | 0          |
| ENSG00000215237 | ENSG00000215237 | 9     | 14993312       | 15019729     | unprocessed_pseudog  | 611,86      | 0          |
| ENSG00000254951 | ENSG00000254951 | 11    | 7754393        | 7905955      | sense_overlapping    | 547,30      | 0          |
| ENSG00000213005 | PTTG3P          | 8     | 66767400       | 66768005     | processed_pseudoger  | 519,78      | 0,7582127  |
| ENSG00000218561 | ENSG00000218561 | 6     | 86729708       | 86730108     | processed_pseudoger  | 518,80      | 0          |
| ENSG00000254993 | TRIM77BP        | 11    | 49117019       | 49124570     | unprocessed_pseudog  | 500,60      | 0          |
| ENSG00000247134 | ENSG00000247134 | 8     | 32996178       | 33044855     | lincRNA              | 485,08      | 0          |
| ENSG00000246228 | CASC8           | 8     | 127289817      | 127482139    | antisense            | 479,70      | 0          |
| ENSG00000246214 | ENSG00000246214 | 5     | 16615926       | 16629969     | antisense            | 444,06      | 0          |
| ENSG00000237469 | TUBB8P10        | 1     | 227493029      | 227495142    | unprocessed_pseudog  | 442,40      | 0          |
| ENSG00000258754 | LINC01579       | 15    | 93718542       | 94070820     | lincRNA              | 441,20      | 0          |
| ENSG00000255393 | ENSG00000255393 | 11    | 60024908       | 60031077     | lincRNA              | 428,77      | 0          |
| ENSG00000214433 | GOLGA2P8        | 15    | 90291962       | 90295683     | transcribed_unproces | 426,75      | 6,23E-03   |
| ENSG00000225660 | ENSG00000225660 | X     | 146955075      | 146955209    | processed_pseudoger  | 416,40      | 0          |
| ENSG00000263146 | ENSG00000263146 | 18    | 78976555       | 78979074     | lincRNA              | 392,30      | 0          |
| ENSG00000278060 | ENSG00000278060 | 2     | 72932974       | 72934355     | antisense            | 384,46      | 0          |
| ENSG00000229664 | ENSG00000229664 | 10    | 6025978        | 6036427      | antisense            | 384,40      | 0          |
| ENSG00000228708 | ENSG00000228708 | 21    | 18477358       | 18486599     | sense_overlapping    | 379,20      | 0          |
| ENSG00000227681 | ENSG00000227681 | 6     | 147660703      | 147953937    | lincRNA              | 364,10      | 0          |

|                 |                 |    |           |           |                         |        |           |
|-----------------|-----------------|----|-----------|-----------|-------------------------|--------|-----------|
| ENSG00000224356 | ENSG00000224356 | 13 | 100535741 | 100587146 | sense_intronic          | 359,30 | 2,95E-02  |
| ENSG00000233878 | ENSG00000233878 | 7  | 156437789 | 156445588 | lincRNA                 | 338,14 | 0         |
| ENSG00000248202 | ENSG00000248202 | 5  | 97881420  | 97922695  | lincRNA                 | 336,00 | 0         |
| ENSG00000247213 | LINC01498       | 12 | 108434130 | 108492585 | antisense               | 331,85 | 0         |
| ENSG00000254266 | PKIA-AS1        | 8  | 78426103  | 78558503  | lincRNA                 | 327,20 | 0         |
| ENSG00000261458 | ENSG00000261458 | 16 | 74842587  | 74843883  | unprocessed_pseudogen   | 308,60 | 0         |
| ENSG00000254919 | ENSG00000254919 | 11 | 35915051  | 35918739  | antisense               | 307,10 | 0         |
| ENSG00000198491 | ENSG00000198491 | 3  | 187197090 | 187207629 | antisense               | 297,70 | 6,23E-03  |
| ENSG00000226397 | C12orf77        | 12 | 24993424  | 24997519  | lincRNA                 | 293,80 | 0         |
| ENSG00000266489 | ENSG00000266489 | 18 | 24516883  | 24518006  | lincRNA                 | 292,50 | 0         |
| ENSG00000233508 | ENSG00000233508 | 20 | 43190101  | 43202599  | lincRNA                 | 287,39 | 0         |
| ENSG00000234354 | RPS26P47        | 13 | 100539901 | 100540248 | processed_pseudogen     | 286,35 | 0         |
| ENSG00000268942 | CKS1BP3         | 5  | 62512246  | 62512482  | processed_pseudogen     | 282,25 | 0         |
| ENSG00000189238 | LINC00943       | 12 | 126726270 | 126746252 | lincRNA                 | 278,60 | 0         |
| ENSG00000226792 | LINC00371       | 13 | 51082119  | 51172388  | lincRNA                 | 278,27 | 0         |
| ENSG00000257859 | CASC18          | 12 | 105704203 | 105744062 | lincRNA                 | 278,10 | 0         |
| ENSG00000230356 | NCAPD2P1        | 7  | 34750253  | 34752053  | processed_pseudogen     | 276,99 | 0         |
| ENSG00000263041 | ENSG00000263041 | 10 | 117825903 | 117830518 | lincRNA                 | 273,00 | 0         |
| ENSG00000279924 | ENSG00000279924 | 13 | 18174010  | 18178465  | unprocessed_pseudogen   | 270,55 | 4,86E-02  |
| ENSG00000259156 | CHEK2P2         | 15 | 20282744  | 20291586  | transcribed_unprocessed | 266,60 | 0         |
| ENSG00000227902 | ENSG00000227902 | 2  | 146879909 | 146898218 | lincRNA                 | 259,30 | 0         |
| ENSG00000227835 | CARM1P1         | 9  | 2907073   | 3053408   | transcribed_unprocessed | 249,40 | 0         |
| ENSG00000227517 | LINC01483       | 17 | 69577251  | 69903000  | lincRNA                 | 236,27 | 0         |
| ENSG00000227042 | ENSG00000227042 | X  | 10242339  | 10365323  | lincRNA                 | 230,10 | 0         |
| ENSG00000246316 | ENSG00000246316 | 5  | 114488997 | 114668410 | antisense               | 224,47 | 0         |
| ENSG00000254968 | ENSG00000254968 | 11 | 112393118 | 112621729 | lincRNA                 | 222,40 | 0         |
| ENSG00000226191 | CLK3P2          | 1  | 247936061 | 247937513 | processed_pseudogen     | 218,71 | 6,23E-03  |
| ENSG00000251391 | ENSG00000251391 | 5  | 66298468  | 66322944  | lincRNA                 | 218,70 | 6,23E-03  |
| ENSG00000250400 | LINC00977       | 8  | 129216467 | 129241250 | lincRNA                 | 216,40 | 0         |
| ENSG00000250366 | TUNAR           | 14 | 95876392  | 95925571  | lincRNA                 | 214,70 | 0         |
| ENSG00000223611 | SUPT20HL2       | X  | 24310907  | 24313315  | processed_pseudogen     | 202,10 | 6,23E-03  |
| ENSG00000248118 | LINC01019       | 5  | 3417152   | 3536094   | lincRNA                 | 187,00 | 0         |
| ENSG00000255039 | ENSG00000255039 | 11 | 97222644  | 97259987  | lincRNA                 | 184,30 | 0         |
| ENSG00000253576 | ENSG00000253576 | 8  | 91975908  | 91977418  | antisense               | 181,90 | 0,1217903 |
| ENSG00000224625 | TUBB8P6         | 1  | 242057085 | 242060242 | unprocessed_pseudogen   | 181,70 | 0         |
| ENSG00000167355 | ENSG00000167355 | 11 | 5304976   | 5505652   | processed_transcript    | 177,50 | 0         |
| ENSG00000237838 | ENSG00000237838 | 3  | 24687919  | 25174305  | lincRNA                 | 175,80 | 0         |
| ENSG00000250584 | LINC01511       | 5  | 1363582   | 1380067   | lincRNA                 | 170,70 | 0         |
| ENSG00000253877 | LINC01608       | 8  | 110937690 | 111027433 | lincRNA                 | 166,20 | 0         |
| ENSG00000253642 | ENSG00000253642 | 8  | 33604856  | 34039008  | lincRNA                 | 160,30 | 0         |
| ENSG00000236345 | ENSG00000236345 | 6  | 63806836  | 63822642  | antisense               | 159,93 | 0         |
| ENSG00000228791 | THR-AS1         | 3  | 24494087  | 24681711  | processed_transcript    | 159,50 | 0         |
| ENSG00000243144 | ENSG00000243144 | 7  | 91311368  | 91515409  | lincRNA                 | 158,40 | 0         |
| ENSG00000254369 | HOXA-AS3        | 7  | 27129977  | 27155928  | antisense               | 156,32 | 0         |
| ENSG00000237534 | LINC00383       | 13 | 69222346  | 69292154  | lincRNA                 | 151,80 | 0         |
| ENSG00000276012 | ENSG00000276012 | 13 | 101717564 | 101723106 | antisense               | 150,60 | 0         |
| ENSG00000236377 | ENSG00000236377 | 17 | 32905662  | 32906584  | lincRNA                 | 150,53 | 0         |
| ENSG00000266181 | EIF4A3P1        | 18 | 24522273  | 24522919  | processed_pseudogen     | 149,90 | 6,23E-03  |
| ENSG00000258879 | ENSG00000258879 | 12 | 25011415  | 25020893  | lincRNA                 | 149,40 | 2,95E-02  |
| ENSG00000259343 | TMC3-AS1        | 15 | 81324377  | 81362037  | antisense               | 145,56 | 0         |
| ENSG00000232524 | ENSG00000232524 | 7  | 123456629 | 123459856 | antisense               | 145,50 | 0         |
| ENSG00000228358 | ENSG00000228358 | 4  | 117360625 | 117372852 | lincRNA                 | 140,70 | 0         |
| ENSG00000235827 | TUBB8P9         | 1  | 227506182 | 227508292 | unprocessed_pseudogen   | 137,70 | 0         |
| ENSG00000214009 | PCNAP3          | X  | 46058751  | 46059528  | processed_pseudogen     | 136,75 | 1,6174211 |
| ENSG00000235008 | ENSG00000235008 | 6  | 166701094 | 166702839 | processed_pseudogen     | 136,40 | 6,23E-03  |
| ENSG00000223742 | ENSG00000223742 | X  | 28571532  | 28586395  | lincRNA                 | 135,10 | 0         |
| ENSG00000218052 | ADAMTS7P4       | 15 | 85255369  | 85330334  | transcribed_unprocessed | 133,41 | 0         |
| ENSG00000261722 | ENSG00000261722 | 16 | 79212711  | 79229453  | lincRNA                 | 133,38 | 0         |
| ENSG00000249365 | ENSG00000249365 | 5  | 125108204 | 125149929 | lincRNA                 | 132,70 | 0         |

|                 |                 |    |           |           |                      |        |           |
|-----------------|-----------------|----|-----------|-----------|----------------------|--------|-----------|
| ENSG00000223838 | ENSG00000223838 | 7  | 19353534  | 19578606  | lincRNA              | 131,00 | 0         |
| ENSG00000272163 | ENSG00000272163 | 8  | 24912165  | 24914717  | antisense            | 130,77 | 0,4332376 |
| ENSG00000226484 | ENSG00000226484 | X  | 36365626  | 36440292  | antisense            | 129,20 | 0         |
| ENSG00000267291 | ENSG00000267291 | 19 | 38596346  | 38601694  | antisense            | 127,21 | 6,23E-03  |
| ENSG00000273920 | ENSG00000273920 | 15 | 81335577  | 81336119  | antisense            | 124,80 | 0         |
| ENSG00000234715 | ENSG00000234715 | 7  | 103445207 | 103514007 | antisense            | 124,20 | 0         |
| ENSG00000267429 | ENSG00000267429 | 19 | 56347081  | 56348183  | sense_intronic       | 122,69 | 0         |
| ENSG00000236453 | ENSG00000236453 | 7  | 94022833  | 94066661  | lincRNA              | 122,00 | 0,1217903 |
| ENSG00000214237 | ENSG00000214237 | 3  | 150871045 | 150891060 | transcribed_unproces | 121,90 | 6,23E-03  |
| ENSG00000261780 | ENSG00000261780 | 18 | 73324941  | 73349878  | processed_transcript | 120,90 | 0         |
| ENSG00000243797 | ENSG00000243797 | 7  | 106372251 | 106770207 | sense_overlapping    | 120,40 | 0         |
| ENSG00000280169 | ENSG00000280169 | 13 | 100537365 | 100539567 | antisense            | 118,67 | 0,3565078 |
| ENSG00000261206 | LINC00561       | 13 | 75932395  | 75935132  | lincRNA              | 117,90 | 6,23E-03  |
| ENSG00000255311 | ENSG00000255311 | 11 | 83643602  | 83725390  | antisense            | 117,83 | 0         |
| ENSG00000233491 | ENSG00000233491 | 7  | 81576386  | 81626216  | lincRNA              | 117,33 | 0         |
| ENSG00000257474 | ENSG00000257474 | 12 | 79540203  | 79550535  | lincRNA              | 116,60 | 0         |
| ENSG00000253100 | ENSG00000253100 | 8  | 25685798  | 25687524  | lincRNA              | 116,40 | 6,23E-03  |
| ENSG00000267109 | ENSG00000267109 | 17 | 70312831  | 70368916  | lincRNA              | 114,70 | 0         |
| ENSG00000255457 | ENSG00000255457 | 8  | 13695574  | 13705506  | processed_pseudoger  | 114,69 | 0         |
| ENSG00000275612 | ENSG00000275612 | 11 | 7698951   | 7699393   | sense_intronic       | 114,40 | 0         |
| ENSG00000237571 | ENSG00000237571 | 2  | 215274992 | 215277947 | lincRNA              | 113,70 | 0         |
| ENSG00000253288 | ENSG00000253288 | 8  | 137809444 | 138083570 | lincRNA              | 112,20 | 0         |
| ENSG00000224746 | ENSG00000224746 | 7  | 135926455 | 135932881 | antisense            | 110,50 | 0         |
| ENSG00000254811 | ENSG00000254811 | 11 | 106250019 | 106264905 | transcribed_unproces | 110,30 | 0         |
| ENSG00000245719 | ENSG00000245719 | 15 | 67834310  | 67838879  | lincRNA              | 109,54 | 0         |
| ENSG00000268696 | ZNF723P         | 19 | 22832201  | 22859422  | unprocessed_pseudog  | 109,20 | 0         |
| ENSG00000259293 | ENSG00000259293 | 15 | 58434890  | 58498735  | antisense            | 108,00 | 0         |
| ENSG00000255099 | ENSG00000255099 | 8  | 109777912 | 109782288 | processed_pseudoger  | 105,60 | 0         |
| ENSG00000267134 | ENSG00000267134 | 18 | 64104091  | 64423601  | lincRNA              | 104,90 | 0         |
| ENSG00000256124 | LINC01152       | 17 | 72030291  | 72041297  | lincRNA              | 104,09 | 0         |
| ENSG00000217455 | ENSG00000217455 | 7  | 3140234   | 3174654   | lincRNA              | 103,82 | 0         |
| ENSG00000250874 | ENSG00000250874 | 5  | 85663232  | 85664684  | lincRNA              | 103,50 | 0         |
| ENSG00000259392 | ENSG00000259392 | 15 | 32836983  | 32837326  | transcribed_processe | 102,70 | 6,23E-03  |
| ENSG00000232642 | ENSG00000232642 | 2  | 24165884  | 24175005  | antisense            | 100,57 | 2,21E-02  |
| ENSG00000226320 | ENSG00000226320 | 3  | 34159334  | 34562877  | lincRNA              | 99,30  | 0         |
| ENSG00000261720 | ENSG00000261720 | 16 | 1065240   | 1066502   | lincRNA              | 99,10  | 2,95E-02  |
| ENSG00000256717 | ENSG00000256717 | 11 | 115659658 | 115843146 | lincRNA              | 98,80  | 0         |
| ENSG00000231873 | ENSG00000231873 | 3  | 40766207  | 40862626  | lincRNA              | 98,30  | 0         |
| ENSG00000230448 | LINC00276       | 2  | 13710531  | 14400963  | lincRNA              | 96,10  | 0         |
| ENSG00000238009 | ENSG00000238009 | 1  | 89295     | 133723    | lincRNA              | 95,91  | 6,23E-03  |
| ENSG00000254031 | ENSG00000254031 | 8  | 71155457  | 71204223  | antisense            | 95,80  | 0         |
| ENSG00000197984 | OR51A8P         | 11 | 4832133   | 4833072   | unprocessed_pseudog  | 95,10  | 0         |
| ENSG00000278130 | ENSG00000278130 | 9  | 138177426 | 138179774 | unprocessed_pseudog  | 93,50  | 0         |
| ENSG00000232461 | ENSG00000232461 | 3  | 176643941 | 176867838 | lincRNA              | 92,80  | 0         |
| ENSG00000255027 | ENSG00000255027 | 11 | 125903247 | 125938916 | antisense            | 92,00  | 0,0358681 |
| ENSG00000226674 | TEX41           | 2  | 144667967 | 145262988 | lincRNA              | 91,95  | 0         |
| ENSG00000223715 | LINC01208       | 3  | 176604143 | 176635532 | lincRNA              | 90,08  | 0         |
| ENSG00000223930 | ENSG00000223930 | 3  | 178202050 | 178385417 | lincRNA              | 89,90  | 0         |
| ENSG00000267337 | LINC01478       | 18 | 44323436  | 44531697  | lincRNA              | 89,50  | 0         |
| ENSG00000234787 | LINC00458       | 13 | 54115783  | 54132866  | lincRNA              | 89,00  | 6,23E-03  |
| ENSG00000241668 | RPL19P11        | 5  | 31053565  | 31054153  | processed_pseudoger  | 88,18  | 0         |
| ENSG00000228711 | ENSG00000228711 | 7  | 82657035  | 82657411  | processed_pseudoger  | 87,70  | 2,95E-02  |
| ENSG00000260896 | ENSG00000260896 | 16 | 80828735  | 80892595  | lincRNA              | 87,37  | 0         |
| ENSG00000224643 | ENSG00000224643 | 2  | 183083405 | 183108519 | antisense            | 87,09  | 0         |
| ENSG00000231421 | ENSG00000231421 | 17 | 30573471  | 30577000  | processed_transcript | 86,85  | 6,23E-03  |
| ENSG00000243273 | ENSG00000243273 | 3  | 150890636 | 151038818 | antisense            | 85,60  | 0         |
| ENSG00000255425 | OR8G3P          | 11 | 124214767 | 124215687 | unprocessed_pseudog  | 85,00  | 0         |
| ENSG00000250891 | ENSG00000250891 | 5  | 118468156 | 118562117 | lincRNA              | 84,77  | 0         |
| ENSG00000275078 | ENSG00000275078 | 8  | 139508701 | 139508971 | unprocessed_pseudog  | 84,30  | 0,1217903 |

|                 |                 |    |           |           |                      |       |           |
|-----------------|-----------------|----|-----------|-----------|----------------------|-------|-----------|
| ENSG00000245750 | DRAIC           | 15 | 69463026  | 69571440  | lincRNA              | 83,58 | 4,86E-02  |
| ENSG00000220575 | HTR5A-AS1       | 7  | 155067067 | 155071557 | antisense            | 83,00 | 0,1217903 |
| ENSG00000236452 | ENSG00000236452 | 3  | 34203244  | 34268811  | lincRNA              | 82,50 | 0,1217903 |
| ENSG00000242850 | RPL23AP68       | 12 | 87169985  | 87170429  | processed_pseudogen  | 79,60 | 0         |
| ENSG00000175841 | FAM172BP        | 3  | 101521891 | 101522979 | processed_pseudogen  | 79,50 | 2,95E-02  |
| ENSG00000237301 | ENSG00000237301 | 1  | 15586136  | 15603626  | antisense            | 78,41 | 6,23E-03  |
| ENSG00000250411 | ENSG00000250411 | 5  | 125036831 | 125042239 | lincRNA              | 78,20 | 0         |
| ENSG00000234921 | ENSG00000234921 | 9  | 124031624 | 124032524 | antisense            | 77,80 | 0,1217903 |
| ENSG00000253535 | ENSG00000253535 | 8  | 24295814  | 24912073  | antisense            | 77,00 | 6,23E-03  |
| ENSG00000253972 | ENSG00000253972 | 8  | 119215111 | 119246848 | lincRNA              | 77,00 | 0         |
| ENSG00000267555 | ENSG00000267555 | 19 | 32831295  | 32833168  | antisense            | 76,91 | 0         |
| ENSG00000273628 | ENSG00000273628 | 13 | 24933006  | 24936796  | unprocessed_pseudog  | 75,27 | 0         |
| ENSG00000185847 | LINC01405       | 12 | 110936585 | 110958208 | lincRNA              | 75,20 | 0         |
| ENSG00000238150 | ENSG00000238150 | 19 | 53775599  | 53775882  | processed_pseudogen  | 74,96 | 0         |
| ENSG00000254480 | ENSG00000254480 | 11 | 4187140   | 4202655   | lincRNA              | 74,50 | 0         |
| ENSG00000244018 | RPL35P6         | 8  | 18774547  | 18774918  | processed_pseudogen  | 73,96 | 0         |
| ENSG00000253799 | LINC01030       | 8  | 90592804  | 90606065  | lincRNA              | 73,40 | 6,23E-03  |
| ENSG00000251259 | ENSG00000251259 | 4  | 105137280 | 105140619 | lincRNA              | 72,65 | 3,27E-03  |
| ENSG00000267193 | ENSG00000267193 | 18 | 45669367  | 45747215  | antisense            | 72,50 | 0         |
| ENSG00000237605 | ENSG00000237605 | 1  | 206634649 | 206635622 | antisense            | 72,18 | 6,23E-03  |
| ENSG00000248311 | ENSG00000248311 | 5  | 4775476   | 4805769   | lincRNA              | 72,10 | 0         |
| ENSG00000261555 | ENSG00000261555 | 16 | 17825252  | 17826906  | lincRNA              | 71,10 | 0         |
| ENSG00000261848 | ENSG00000261848 | 17 | 3134969   | 3177031   | lincRNA              | 70,90 | 6,23E-03  |
| ENSG00000248486 | ENSG00000248486 | 5  | 15192139  | 15266541  | lincRNA              | 70,80 | 0         |
| ENSG00000231459 | LINC00032       | 9  | 27245684  | 27282793  | lincRNA              | 70,54 | 4,86E-02  |
| ENSG00000256879 | ENSG00000256879 | 12 | 20361732  | 20370262  | antisense            | 70,45 | 0         |
| ENSG00000229259 | LRR37A12P       | 1  | 32423214  | 32426789  | unprocessed_pseudog  | 69,60 | 2,95E-02  |
| ENSG00000272027 | ENSG00000272027 | 2  | 34692290  | 34703606  | lincRNA              | 69,20 | 0         |
| ENSG00000254180 | ENSG00000254180 | 8  | 90534611  | 90620070  | lincRNA              | 68,64 | 6,23E-03  |
| ENSG00000244053 | RPL13AP2        | 14 | 47200575  | 47201104  | processed_pseudogen  | 68,19 | 0         |
| ENSG00000235974 | VN2R19P         | 19 | 58012589  | 58025926  | unitary_pseudogene   | 67,85 | 0,4850164 |
| ENSG00000249396 | ENSG00000249396 | 5  | 10493527  | 10502728  | lincRNA              | 67,50 | 6,23E-03  |
| ENSG00000267568 | ENSG00000267568 | 17 | 76950317  | 76969156  | processed_transcript | 67,27 | 0         |
| ENSG00000203585 | ENSG00000203585 | 12 | 67519829  | 67567126  | lincRNA              | 66,17 | 0,2746192 |
| ENSG00000243499 | RPS6P21         | 12 | 131667492 | 131668246 | processed_pseudogen  | 66,10 | 0         |
| ENSG00000253619 | ENSG00000253619 | 8  | 120913065 | 121119754 | lincRNA              | 65,36 | 0         |
| ENSG00000177112 | MRV11-AS1       | 11 | 10541272  | 10599932  | antisense            | 64,88 | 0         |
| ENSG00000250420 | AACSP1          | 5  | 178764861 | 178818435 | transcribed_unproces | 64,00 | 0         |
| ENSG00000254235 | ENSG00000254235 | 8  | 9249417   | 9413714   | lincRNA              | 63,50 | 0,1217903 |
| ENSG00000253539 | ENSG00000253539 | 8  | 99796615  | 99799187  | antisense            | 63,40 | 0         |
| ENSG00000230131 | ENSG00000230131 | 10 | 123356450 | 123517708 | lincRNA              | 62,10 | 0         |
| ENSG00000255046 | ENSG00000255046 | 8  | 11797928  | 11802568  | lincRNA              | 61,05 | 0,6309753 |
| ENSG00000272525 | ENSG00000272525 | 5  | 73497550  | 73498293  | lincRNA              | 60,34 | 1,40E-02  |
| ENSG00000251138 | ENSG00000251138 | 12 | 74133166  | 74402535  | lincRNA              | 60,30 | 0         |
| ENSG00000239219 | ENSG00000239219 | 3  | 169939353 | 169966734 | antisense            | 60,27 | 0,0358681 |
| ENSG00000237813 | ENSG00000237813 | 7  | 116238260 | 116499465 | antisense            | 60,10 | 6,23E-03  |
| ENSG00000260586 | ENSG00000260586 | 15 | 71342324  | 71348471  | sense_intronic       | 59,30 | 6,23E-03  |
| ENSG00000258700 | LINC00871       | 14 | 45940943  | 46501823  | lincRNA              | 59,20 | 0         |
| ENSG00000228624 | ENSG00000228624 | 6  | 113969701 | 114471705 | antisense            | 58,38 | 0         |
| ENSG00000257364 | VENTXP3         | 12 | 74292324  | 74293096  | processed_pseudogen  | 58,30 | 0         |
| ENSG00000253591 | ENSG00000253591 | 5  | 170639158 | 170681437 | antisense            | 58,10 | 0         |
| ENSG00000258803 | ENSG00000258803 | 14 | 56514331  | 56551309  | lincRNA              | 58,06 | 0         |
| ENSG00000258637 | ENSG00000258637 | 14 | 79661666  | 79791263  | antisense            | 57,60 | 6,23E-03  |
| ENSG00000230552 | ENSG00000230552 | 2  | 176724268 | 176819310 | lincRNA              | 57,50 | 0         |
| ENSG00000227579 | ENSG00000227579 | 1  | 177393287 | 177597709 | lincRNA              | 57,30 | 0         |
| ENSG00000243069 | ARHGEF26-AS1    | 3  | 154024401 | 154121332 | processed_transcript | 56,50 | 0         |
| ENSG00000258220 | ENSG00000258220 | 12 | 78326680  | 78359746  | lincRNA              | 56,00 | 0         |
| ENSG00000271989 | ENSG00000271989 | 1  | 10429881  | 10430677  | antisense            | 55,17 | 0,0358681 |
| ENSG00000224517 | HTR2A-AS1       | 13 | 46852143  | 46856299  | antisense            | 55,00 | 0         |

|                 |                 |   |    |           |           |                      |       |           |
|-----------------|-----------------|---|----|-----------|-----------|----------------------|-------|-----------|
| ENSG00000249484 | LINC01470       |   | 5  | 152618965 | 153223543 | lincRNA              | 54,90 | 0         |
| ENSG00000249464 | LINC01091       |   | 4  | 123650267 | 123930406 | lincRNA              | 54,54 | 0         |
| ENSG00000258454 | ENSG00000258454 |   | 14 | 76235817  | 76263474  | sense_overlapping    | 54,41 | 1,40E-02  |
| ENSG00000256995 | ENSG00000256995 |   | 12 | 22699859  | 23174125  | lincRNA              | 54,20 | 0         |
| ENSG00000257986 | ENSG00000257986 |   | 14 | 25835858  | 26143305  | lincRNA              | 53,00 | 6,23E-03  |
| ENSG00000228221 | LINC00578       |   | 3  | 177441921 | 177752305 | lincRNA              | 53,00 | 0         |
| ENSG00000237647 | ERICH1-AS1      |   | 8  | 737651    | 1137777   | antisense            | 52,50 | 0         |
| ENSG00000237433 | RPSAP11         |   | 3  | 32190747  | 32191627  | processed_pseudogen  | 51,80 | 2,95E-02  |
| ENSG00000254194 | ENSG00000254194 |   | 8  | 33973701  | 34009595  | lincRNA              | 51,50 | 0         |
| ENSG00000276668 | ENSG00000276668 |   | 11 | 7699562   | 7699988   | sense_intronic       | 51,30 | 0         |
| ENSG00000261584 | ENSG00000261584 |   | 6  | 26686241  | 26687964  | lincRNA              | 51,30 | 0         |
| ENSG00000232046 | ENSG00000232046 |   | 2  | 66574030  | 66730157  | lincRNA              | 50,90 | 0         |
| ENSG00000269009 | SLC6A21P        |   | 19 | 49255472  | 49256102  | processed_pseudogen  | 50,30 | 2,95E-02  |
| ENSG00000250682 | LINC00491       |   | 5  | 102609156 | 102671559 | lincRNA              | 50,30 | 6,23E-03  |
| ENSG00000227948 | ENSG00000227948 |   | 7  | 111411319 | 111411883 | processed_pseudogen  | 50,00 | 0         |
| ENSG00000232599 | ENSG00000232599 | X |    | 125203805 | 125204338 | processed_pseudogen  | 49,92 | 0,3565078 |
| ENSG00000249388 | ENSG00000249388 |   | 12 | 54082118  | 54102693  | lincRNA              | 49,90 | 0         |
| ENSG00000231826 | ENSG00000231826 |   | 2  | 43027853  | 43039547  | lincRNA              | 49,80 | 6,23E-03  |
| ENSG00000257817 | ENSG00000257817 |   | 12 | 114713811 | 114767957 | lincRNA              | 49,75 | 0         |
| ENSG00000228824 | MIR4500HG       |   | 13 | 87427214  | 87671259  | lincRNA              | 49,60 | 0         |
| ENSG00000258725 | PRC1-AS1        |   | 15 | 90966345  | 90988624  | antisense            | 49,51 | 0         |
| ENSG00000254560 | BBOX1-AS1       |   | 11 | 27047186  | 27220113  | antisense            | 49,10 | 2,95E-02  |
| ENSG00000224506 | ENSG00000224506 |   | 6  | 125674353 | 125720218 | lincRNA              | 48,64 | 0         |
| ENSG00000233338 | TLR8-AS1        | X |    | 12902817  | 12908333  | antisense            | 48,60 | 6,23E-03  |
| ENSG00000267761 | ENSG00000267761 |   | 18 | 47285725  | 47594550  | lincRNA              | 48,30 | 0         |
| ENSG00000253438 | PCAT1           |   | 8  | 126847055 | 127021014 | lincRNA              | 48,20 | 0         |
| ENSG00000224932 | ENSG00000224932 |   | 4  | 117314597 | 117360639 | lincRNA              | 48,20 | 0         |
| ENSG00000257636 | ENSG00000257636 |   | 14 | 30437992  | 30573629  | antisense            | 47,80 | 2,95E-02  |
| ENSG00000232692 | ENSG00000232692 |   | 21 | 26378552  | 26471698  | antisense            | 47,76 | 1,40E-02  |
| ENSG00000262898 | ENSG00000262898 |   | 17 | 83144131  | 83177607  | lincRNA              | 47,73 | 0,0358681 |
| ENSG00000232310 | ENSG00000232310 |   | 6  | 134525314 | 134659836 | lincRNA              | 47,26 | 6,23E-03  |
| ENSG00000226083 | SLC39A12-AS1    |   | 10 | 18001786  | 18010562  | antisense            | 47,20 | 6,23E-03  |
| ENSG00000256663 | ENSG00000256663 |   | 12 | 20551590  | 20553012  | processed_pseudogen  | 47,12 | 0,8926569 |
| ENSG00000261405 | ENSG00000261405 |   | 16 | 33562649  | 33570935  | transcribed_unproces | 47,10 | 2,95E-02  |
| ENSG00000277851 | ENSG00000277851 |   | 12 | 92247756  | 92363832  | lincRNA              | 47,10 | 0         |
| ENSG00000250685 | ENSG00000250685 |   | 16 | 84192558  | 84197053  | antisense            | 47,00 | 4,86E-02  |
| ENSG00000257219 | ENSG00000257219 |   | 12 | 76259839  | 76305131  | lincRNA              | 47,00 | 0         |
| ENSG00000166408 | ORSP1P          |   | 11 | 7772890   | 7773814   | unprocessed_pseudog  | 46,80 | 0         |
| ENSG00000234509 | ENSG00000234509 |   | 21 | 31653593  | 31659500  | lincRNA              | 46,60 | 9,18E-02  |
| ENSG00000250237 | ENSG00000250237 |   | 5  | 69038518  | 69043821  | lincRNA              | 46,59 | 7,06E-02  |
| ENSG00000197085 | NPSR1-AS1       |   | 7  | 34346512  | 34871582  | processed_transcript | 46,50 | 0         |
| ENSG00000233996 | ENSG00000233996 |   | 2  | 189486480 | 189487992 | processed_pseudogen  | 45,38 | 6,23E-03  |
| ENSG00000248588 | ENSG00000248588 |   | 5  | 92826255  | 92844004  | lincRNA              | 45,30 | 6,23E-03  |
| ENSG00000258066 | ENSG00000258066 |   | 12 | 77775783  | 77783576  | lincRNA              | 45,20 | 0         |
| ENSG00000277215 | SPANXA2-OT1     | X |    | 141502849 | 141649927 | lincRNA              | 45,19 | 4,86E-02  |
| ENSG00000232537 | ENSG00000232537 |   | 1  | 209147267 | 209155101 | lincRNA              | 44,90 | 0         |
| ENSG00000251577 | ENSG00000251577 |   | 4  | 103548745 | 103624534 | antisense            | 44,10 | 6,23E-03  |
| ENSG00000248491 | ENSG00000248491 |   | 4  | 127096891 | 127470569 | lincRNA              | 44,08 | 0         |
| ENSG00000276842 | ENSG00000276842 |   | 12 | 25103124  | 25103869  | antisense            | 44,06 | 0         |
| ENSG00000231107 | LINC01508       |   | 9  | 90300902  | 90433505  | lincRNA              | 44,00 | 6,23E-03  |
| ENSG00000230489 | VAV3-AS1        |   | 1  | 107964443 | 107994607 | antisense            | 43,20 | 2,95E-02  |
| ENSG00000254695 | ENSG00000254695 |   | 11 | 15643885  | 15705368  | lincRNA              | 42,90 | 0         |
| ENSG00000249041 | ENSG00000249041 |   | 4  | 154754756 | 154781873 | antisense            | 42,60 | 0,1217903 |
| ENSG00000267287 | ENSG00000267287 |   | 18 | 79576460  | 79589010  | processed_transcript | 42,58 | 0,512233  |
| ENSG00000248834 | MARK2P5         |   | 5  | 15384220  | 15384853  | processed_pseudogen  | 42,50 | 2,95E-02  |
| ENSG00000280206 | ENSG00000280206 |   | 16 | 15701237  | 15702118  | lincRNA              | 42,44 | 0         |
| ENSG00000224367 | OACYLP          |   | 18 | 58996734  | 59069338  | unitary_pseudogene   | 42,20 | 0         |
| ENSG00000263655 | ENSG00000263655 |   | 18 | 73914405  | 74034161  | lincRNA              | 42,20 | 6,23E-03  |
| ENSG00000231557 | ENSG00000231557 |   | 2  | 198882573 | 199071791 | lincRNA              | 42,00 | 0         |

|                 |                 |    |           |           |                                    |       |           |
|-----------------|-----------------|----|-----------|-----------|------------------------------------|-------|-----------|
| ENSG00000235111 | ENSG00000235111 | 22 | 49612657  | 49615716  | sense_intronic                     | 41,70 | 6,23E-03  |
| ENSG00000251165 | F11-AS1         | 4  | 186286094 | 186500997 | antisense                          | 41,70 | 6,23E-03  |
| ENSG00000266984 | POLR3GP2        | 18 | 48478561  | 48479228  | processed_pseudogen                | 41,58 | 0,8926569 |
| ENSG00000267174 | ENSG00000267174 | 19 | 11300777  | 11324441  | 3prime_overlapping_ncp             | 41,30 | 2,95E-02  |
| ENSG00000250131 | ENSG00000250131 | 4  | 177444979 | 177677126 | antisense                          | 40,74 | 3,27E-03  |
| ENSG00000263427 | ENSG00000263427 | 17 | 8056225   | 8057621   | lincRNA                            | 40,50 | 0         |
| ENSG00000237720 | ENSG00000237720 | 2  | 2834264   | 2838391   | lincRNA                            | 40,50 | 2,95E-02  |
| ENSG00000236922 | LINC01378       | 4  | 117406166 | 117691188 | lincRNA                            | 40,10 | 0,1217903 |
| ENSG00000243988 | RPS24P17        | 16 | 56906534  | 56906956  | processed_pseudogen                | 40,00 | 1,6498059 |
| ENSG00000274204 | ENSG00000274204 | 13 | 106506046 | 106506713 | sense_intronic                     | 39,23 | 0         |
| ENSG00000253868 | FER1L6-AS2      | 8  | 124046073 | 124171522 | antisense                          | 39,20 | 0         |
| ENSG00000249797 | ENSG00000249797 | 5  | 117925008 | 118266035 | lincRNA                            | 39,20 | 0         |
| ENSG00000267052 | ENSG00000267052 | 7  | 106570947 | 106598908 | lincRNA                            | 38,40 | 0         |
| ENSG00000268295 | POLR3GP1        | 14 | 91603173  | 91603433  | transcribed_processed_transcript   | 38,30 | 0         |
| ENSG00000231134 | TCF7L1-IT1      | 2  | 85186409  | 85187253  | sense_intronic                     | 37,73 | 6,23E-03  |
| ENSG00000257222 | ENSG00000257222 | 12 | 102063355 | 102074820 | antisense                          | 37,65 | 6,23E-03  |
| ENSG00000186232 | SSU72P3         | 11 | 4329865   | 4330446   | processed_pseudogen                | 37,40 | 2,95E-02  |
| ENSG00000278239 | ENSG00000278239 | 19 | 41833686  | 41835950  | lincRNA                            | 37,30 | 0         |
| ENSG00000232715 | LINC01022       | 7  | 158590629 | 158591120 | antisense                          | 37,30 | 6,23E-03  |
| ENSG00000247732 | ENSG00000247732 | 5  | 7290823   | 7296345   | unprocessed_pseudogen              | 37,10 | 2,95E-02  |
| ENSG00000248112 | ENSG00000248112 | 5  | 82919376  | 82921119  | lincRNA                            | 36,90 | 0         |
| ENSG00000261305 | ENSG00000261305 | 7  | 150341771 | 150342607 | sense_overlapping_ncp              | 36,40 | 0         |
| ENSG00000254813 | ENSG00000254813 | 8  | 12765849  | 12811478  | lincRNA                            | 36,20 | 0         |
| ENSG00000255028 | ENSG00000255028 | 11 | 109355085 | 109583907 | antisense                          | 36,10 | 2,95E-02  |
| ENSG00000236885 | ENSG00000236885 | 2  | 151117955 | 151186209 | lincRNA                            | 36,00 | 0         |
| ENSG00000261742 | LINC00922       | 16 | 65284499  | 65576300  | lincRNA                            | 35,73 | 0         |
| ENSG00000231747 | ENSG00000231747 | 2  | 112621809 | 112622167 | processed_pseudogen                | 35,72 | 0,6526668 |
| ENSG00000261418 | ENSG00000261418 | 15 | 23430839  | 23435212  | unprocessed_pseudogen              | 35,50 | 6,23E-03  |
| ENSG00000229336 | ENSG00000229336 | 21 | 19739709  | 19740150  | processed_pseudogen                | 35,36 | 6,23E-03  |
| ENSG00000233735 | ENSG00000233735 | 1  | 240177839 | 240179644 | antisense                          | 35,20 | 0         |
| ENSG00000258535 | ENSG00000258535 | 14 | 51765276  | 51825422  | sense_overlapping_ncp              | 35,00 | 0         |
| ENSG00000228463 | ENSG00000228463 | 1  | 257864    | 297502    | lincRNA                            | 34,92 | 0         |
| ENSG00000276121 | ENSG00000276121 | 15 | 44778196  | 44778721  | lincRNA                            | 34,67 | 0         |
| ENSG00000232021 | LEF1-AS1        | 4  | 108167525 | 108256836 | processed_transcript               | 34,52 | 3,27E-03  |
| ENSG00000261600 | ENSG00000261600 | 2  | 91580336  | 91580863  | lincRNA                            | 33,88 | 0         |
| ENSG00000248019 | FAM13A-AS1      | 4  | 88709789  | 88730103  | antisense                          | 33,76 | 0,8468482 |
| ENSG00000261645 | DISC1FP1        | 11 | 90251232  | 90915052  | processed_transcript               | 33,75 | 1,40E-02  |
| ENSG00000224099 | ENSG00000224099 | 2  | 195448532 | 195478925 | lincRNA                            | 33,60 | 0,5865398 |
| ENSG00000234511 | C5orf58         | 5  | 170232447 | 170252575 | processed_transcript               | 33,53 | 1,95E-02  |
| ENSG00000203523 | TAS2R2P         | 7  | 12491095  | 12492004  | processed_pseudogen                | 33,50 | 2,95E-02  |
| ENSG00000248538 | ENSG00000248538 | 8  | 9189011   | 9202854   | lincRNA                            | 33,38 | 0         |
| ENSG00000274979 | ENSG00000274979 | 12 | 69326574  | 69331882  | lincRNA                            | 33,27 | 0         |
| ENSG00000241956 | ENSG00000241956 | 5  | 164296696 | 165171643 | antisense                          | 33,10 | 0         |
| ENSG00000224184 | MIR3681HG       | 2  | 11848622  | 12578348  | lincRNA                            | 33,08 | 0         |
| ENSG00000228714 | ENSG00000228714 | 9  | 115739663 | 115744239 | lincRNA                            | 33,00 | 0         |
| ENSG00000260798 | ENSG00000260798 | 16 | 68814330  | 68823526  | antisense                          | 32,80 | 0,2746192 |
| ENSG00000254024 | ENSG00000254024 | 8  | 101461177 | 101492499 | antisense                          | 32,80 | 2,95E-02  |
| ENSG00000255583 | ENSG00000255583 | 12 | 63682523  | 63724935  | transcribed_unprocessed_transcript | 32,70 | 6,23E-03  |
| ENSG00000274719 | ENSG00000274719 | 15 | 57990217  | 57990636  | sense_intronic                     | 32,62 | 0         |
| ENSG00000258616 | ENSG00000258616 | 14 | 45706250  | 45715952  | lincRNA                            | 32,40 | 2,95E-02  |
| ENSG00000267665 | ENSG00000267665 | 17 | 77526998  | 77536592  | lincRNA                            | 32,20 | 6,23E-03  |
| ENSG00000260658 | ENSG00000260658 | 16 | 63314264  | 63618046  | lincRNA                            | 32,10 | 6,23E-03  |
| ENSG00000253407 | ENSG00000253407 | 8  | 131130388 | 131144881 | lincRNA                            | 32,10 | 2,95E-02  |
| ENSG00000225398 | PGM5P4          | 2  | 113541937 | 113563298 | unprocessed_pseudogen              | 32,10 | 0         |
| ENSG00000230002 | ALMS1-IT1       | 2  | 73456764  | 73459484  | sense_intronic                     | 32,03 | 0         |
| ENSG00000264693 | ENSG00000264693 | 18 | 77622552  | 77624515  | lincRNA                            | 31,90 | 2,95E-02  |
| ENSG00000258342 | ENSG00000258342 | 14 | 35897982  | 36063743  | sense_overlapping_ncp              | 31,80 | 6,23E-03  |
| ENSG00000228898 | MTCO1P43        | 2  | 117026537 | 117027024 | unprocessed_pseudogen              | 31,80 | 0         |
| ENSG00000224655 | ENSG00000224655 | 2  | 121790444 | 121796702 | lincRNA                            | 31,40 | 6,23E-03  |



|                 |                 |   |    |           |           |                       |       |           |
|-----------------|-----------------|---|----|-----------|-----------|-----------------------|-------|-----------|
| ENSG00000260459 | FTLP14          |   | 16 | 68822587  | 68823070  | processed_pseudogen   | 31,20 | 0         |
| ENSG00000256734 | ENSG00000256734 |   | 11 | 18450112  | 18450868  | processed_pseudogen   | 31,00 | 0,1217903 |
| ENSG00000249856 | ENSG00000249856 |   | 5  | 74917726  | 75023928  | lincRNA               | 30,75 | 0,1187106 |
| ENSG00000167117 | LINC00483       |   | 17 | 50761029  | 50767557  | processed_transcript  | 30,50 | 6,23E-03  |
| ENSG00000237053 | FUCA1P1         |   | 2  | 176804987 | 176806337 | processed_pseudogen   | 30,50 | 0         |
| ENSG00000255660 | RERG-AS1        |   | 12 | 15151923  | 15155283  | lincRNA               | 30,10 | 2,95E-02  |
| ENSG00000230525 | ENSG00000230525 |   | 2  | 66904436  | 66971462  | lincRNA               | 30,10 | 6,23E-03  |
| ENSG00000261298 | ENSG00000261298 |   | 2  | 234222838 | 234224514 | lincRNA               | 30,08 | 6,23E-03  |
| ENSG00000237137 | ENSG00000237137 |   | 9  | 14531916  | 14532042  | processed_pseudogen   | 30,00 | 0         |
| ENSG00000229618 | ENSG00000229618 |   | 7  | 13101391  | 13704149  | lincRNA               | 30,00 | 0         |
| ENSG00000257826 | ENSG00000257826 |   | 14 | 36061026  | 36067190  | lincRNA               | 29,80 | 6,23E-03  |
| ENSG00000254303 | ENSG00000254303 |   | 8  | 121954640 | 122127184 | lincRNA               | 29,80 | 2,95E-02  |
| ENSG00000230649 | ENSG00000230649 |   | 7  | 136025761 | 136084668 | lincRNA               | 29,70 | 0         |
| ENSG00000260706 | ENSG00000260706 |   | 16 | 80065836  | 80167577  | lincRNA               | 29,50 | 6,23E-03  |
| ENSG00000255124 | ENSG00000255124 |   | 11 | 125939212 | 125943702 | lincRNA               | 29,40 | 2,95E-02  |
| ENSG00000266844 | ENSG00000266844 |   | 18 | 76974690  | 76984162  | antisense             | 29,35 | 0         |
| ENSG00000248307 | LINC00616       |   | 4  | 138027422 | 138130709 | lincRNA               | 29,30 | 2,95E-02  |
| ENSG00000249988 | ENSG00000249988 |   | 4  | 14164455  | 14242813  | lincRNA               | 29,10 | 0         |
| ENSG00000270816 | LINC00221       |   | 14 | 106482439 | 106521073 | lincRNA               | 29,03 | 6,23E-03  |
| ENSG00000245384 | ENSG00000245384 |   | 4  | 104490965 | 104697592 | antisense             | 29,00 | 6,23E-03  |
| ENSG00000205054 | LINC01121       |   | 2  | 45164870  | 45323295  | processed_transcript  | 28,91 | 4,86E-02  |
| ENSG00000249618 | ENSG00000249618 |   | 4  | 129771659 | 129955368 | lincRNA               | 28,90 | 6,23E-03  |
| ENSG00000260792 | ENSG00000260792 |   | 14 | 104661120 | 104665558 | lincRNA               | 28,50 | 0         |
| ENSG00000254095 | ENSG00000254095 |   | 8  | 31339197  | 31346479  | processed_transcript  | 28,50 | 0         |
| ENSG00000229703 | ENSG00000229703 |   | 1  | 248692191 | 248699110 | lincRNA               | 28,30 | 6,23E-03  |
| ENSG00000260577 | ENSG00000260577 |   | 16 | 68644248  | 68646168  | antisense             | 28,21 | 0         |
| ENSG00000227718 | ENSG00000227718 |   | 2  | 13723048  | 13758152  | lincRNA               | 28,20 | 2,95E-02  |
| ENSG00000231121 | ENSG00000231121 |   | 12 | 77324641  | 77572275  | lincRNA               | 28,15 | 0         |
| ENSG00000280241 | ENSG00000280241 |   | 4  | 154142122 | 154298819 | antisense             | 28,00 | 6,23E-03  |
| ENSG00000206066 | IGLL3P          |   | 22 | 25318256  | 25320080  | unprocessed_pseudogen | 27,96 | 0         |
| ENSG00000213876 | RPL7AP64        |   | 17 | 7140930   | 7141592   | processed_pseudogen   | 27,93 | 6,23E-03  |
| ENSG00000281508 | CDR1-AS         | X |    | 140783176 | 140784660 | antisense             | 27,91 | 0,5865398 |
| ENSG00000267746 | ENSG00000267746 |   | 18 | 34222965  | 34224761  | antisense             | 27,90 | 0,1217903 |
| ENSG00000255704 | ENSG00000255704 |   | 12 | 131596857 | 131597115 | processed_pseudogen   | 27,90 | 6,23E-03  |
| ENSG00000205622 | ENSG00000205622 |   | 21 | 38863676  | 38956467  | lincRNA               | 27,86 | 6,23E-03  |
| ENSG00000250940 | ENSG00000250940 |   | 4  | 4086638   | 4086814   | processed_pseudogen   | 27,60 | 0         |
| ENSG00000228966 | HOMER2P1        |   | 14 | 106460092 | 106461055 | processed_pseudogen   | 27,59 | 0,1187106 |
| ENSG00000179136 | LINC00670       |   | 17 | 12549782  | 12642854  | lincRNA               | 27,50 | 0         |
| ENSG00000231476 | ENSG00000231476 |   | 7  | 1620654   | 1621405   | lincRNA               | 27,36 | 0,4909563 |
| ENSG00000248927 | ENSG00000248927 |   | 5  | 120781218 | 120790778 | lincRNA               | 27,36 | 0,0358681 |
| ENSG00000236318 | ENSG00000236318 |   | 7  | 17374867  | 17466664  | lincRNA               | 27,10 | 6,23E-03  |
| ENSG00000228033 | ENSG00000228033 |   | 2  | 52722677  | 52910020  | lincRNA               | 27,10 | 0,1217903 |
| ENSG00000254101 | ENSG00000254101 |   | 8  | 136530798 | 136984935 | lincRNA               | 27,09 | 0         |
| ENSG00000246130 | ENSG00000246130 |   | 8  | 23068229  | 23083619  | antisense             | 27,07 | 0         |
| ENSG00000230234 | ENSG00000230234 |   | 6  | 160272617 | 160276130 | lincRNA               | 27,00 | 6,23E-03  |
| ENSG00000247157 | LINC01252       |   | 12 | 11548030  | 11590369  | lincRNA               | 26,86 | 0         |
| ENSG00000227375 | DLG1-AS1        |   | 3  | 197298252 | 197303747 | antisense             | 26,54 | 1,40E-02  |
| ENSG00000237400 | ENSG00000237400 |   | 7  | 36463023  | 36504513  | antisense             | 26,50 | 6,23E-03  |
| ENSG00000223586 | LINC01312       |   | 6  | 133821147 | 133851800 | lincRNA               | 26,33 | 0,0358681 |
| ENSG00000259457 | ENSG00000259457 |   | 15 | 69564724  | 69565790  | lincRNA               | 26,30 | 2,95E-02  |
| ENSG00000267496 | FAM215A         |   | 17 | 43917194  | 43917985  | lincRNA               | 26,20 | 0,1217903 |
| ENSG00000233009 | NALCN-AS1       |   | 13 | 100708325 | 101059286 | antisense             | 26,08 | 0         |
| ENSG00000234626 | ENSG00000234626 |   | 22 | 32327171  | 32343105  | antisense             | 25,70 | 6,23E-03  |
| ENSG00000251418 | ENSG00000251418 |   | 4  | 148526493 | 148527139 | processed_pseudogen   | 25,62 | 6,23E-03  |
| ENSG00000256288 | ENSG00000256288 |   | 12 | 10332861  | 10338292  | lincRNA               | 25,60 | 6,23E-03  |
| ENSG00000231806 | PCAT7           |   | 9  | 94555069  | 94568127  | antisense             | 25,50 | 0,1217903 |
| ENSG00000174977 | ENSG00000174977 |   | 17 | 18650195  | 18651542  | processed_pseudogen   | 25,45 | 0         |
| ENSG00000226337 | ENSG00000226337 |   | 9  | 68541036  | 68644442  | lincRNA               | 25,30 | 6,23E-03  |
| ENSG00000275773 | ENSG00000275773 |   | 6  | 60723148  | 60723898  | lincRNA               | 25,30 | 0         |

|                 |                 |    |           |           |                      |       |           |
|-----------------|-----------------|----|-----------|-----------|----------------------|-------|-----------|
| ENSG00000251027 | ENSG00000251027 | 5  | 106815197 | 107011014 | lincRNA              | 25,20 | 0         |
| ENSG00000259039 | ENSG00000259039 | 14 | 57578632  | 57581320  | antisense            | 25,08 | 0         |
| ENSG00000271133 | ENSG00000271133 | 7  | 20328299  | 20331747  | antisense            | 25,05 | 1,40E-02  |
| ENSG00000233825 | ENSG00000233825 | 10 | 32346499  | 32347179  | antisense            | 24,86 | 0,6898868 |
| ENSG00000258784 | ENSG00000258784 | 14 | 55748208  | 55773203  | lincRNA              | 24,70 | 6,23E-03  |
| ENSG00000233577 | ENSG00000233577 | 22 | 25279529  | 25282674  | lincRNA              | 24,60 | 0         |
| ENSG00000261175 | ENSG00000261175 | 16 | 86722091  | 86741059  | lincRNA              | 24,60 | 0,4036702 |
| ENSG00000225542 | ZNF385D-AS1     | 3  | 21542816  | 21579959  | antisense            | 24,60 | 0         |
| ENSG00000178556 | CKS1BP6         | X  | 30617454  | 30617693  | processed_pseudogen  | 24,44 | 0,6526668 |
| ENSG00000254610 | ENSG00000254610 | 11 | 67934563  | 67955802  | lincRNA              | 24,33 | 6,23E-03  |
| ENSG00000254238 | ENSG00000254238 | 8  | 75026428  | 75029460  | antisense            | 24,32 | 3,27E-03  |
| ENSG00000232006 | ENSG00000232006 | 7  | 42954135  | 43113931  | lincRNA              | 24,30 | 3,27E-03  |
| ENSG00000261617 | ENSG00000261617 | 16 | 9355588   | 9408093   | lincRNA              | 24,24 | 0,1217903 |
| ENSG00000254192 | ENSG00000254192 | 5  | 168654513 | 168667761 | antisense            | 24,20 | 4,86E-02  |
| ENSG00000213885 | RPL13AP7        | 21 | 25361821  | 25362431  | processed_pseudogen  | 24,05 | 6,23E-03  |
| ENSG00000234899 | SOX9-AS1        | 17 | 72034107  | 72237203  | processed_transcript | 24,04 | 0         |
| ENSG00000237057 | ENSG00000237057 | 17 | 15806241  | 15817742  | lincRNA              | 24,00 | 6,23E-03  |
| ENSG00000234828 | ENSG00000234828 | 4  | 149352017 | 149896233 | lincRNA              | 24,00 | 0         |
| ENSG00000251129 | ENSG00000251129 | 4  | 31997397  | 32155406  | lincRNA              | 24,00 | 2,95E-02  |
| ENSG00000256306 | ENSG00000256306 | 12 | 13526854  | 13547582  | processed_transcript | 23,80 | 6,23E-03  |
| ENSG00000253819 | LINC01151       | 8  | 122670385 | 122694106 | lincRNA              | 23,70 | 6,23E-03  |
| ENSG00000258842 | ENSG00000258842 | 14 | 62069518  | 62081154  | lincRNA              | 23,61 | 0,4332376 |
| ENSG00000267586 | LINC00907       | 18 | 42159283  | 42691422  | lincRNA              | 23,55 | 0         |
| ENSG00000259473 | ENSG00000259473 | 15 | 70503907  | 70505928  | lincRNA              | 23,50 | 0         |
| ENSG00000264151 | ENSG00000264151 | 18 | 27336379  | 27595164  | lincRNA              | 23,40 | 6,23E-03  |
| ENSG00000224968 | ENSG00000224968 | 1  | 177351586 | 177366272 | lincRNA              | 23,40 | 6,23E-03  |
| ENSG00000224271 | ENSG00000224271 | 22 | 47631674  | 47855600  | lincRNA              | 23,20 | 0,1217903 |
| ENSG00000233125 | ACTBP12         | 1  | 92229018  | 92229435  | processed_pseudogen  | 23,10 | 0,1217903 |
| ENSG00000255042 | ENSG00000255042 | 11 | 50287661  | 50295334  | transcribed_unproces | 22,97 | 0         |
| ENSG00000267573 | KRT8P5          | 18 | 44320800  | 44322257  | processed_pseudogen  | 22,80 | 0,1217903 |
| ENSG00000270540 | ENSG00000270540 | 2  | 236367560 | 236369102 | antisense            | 22,76 | 0,2746192 |
| ENSG00000225564 | LINC01492       | 9  | 103140523 | 103325034 | lincRNA              | 22,70 | 6,23E-03  |
| ENSG00000258245 | ENSG00000258245 | 12 | 75688794  | 75689096  | processed_pseudogen  | 22,68 | 3,27E-03  |
| ENSG00000248428 | ENSG00000248428 | 5  | 110970951 | 111008899 | lincRNA              | 22,60 | 6,23E-03  |
| ENSG00000229271 | ENSG00000229271 | 3  | 16687986  | 16697479  | lincRNA              | 22,50 | 6,23E-03  |
| ENSG00000250920 | ENSG00000250920 | 4  | 103550927 | 103559127 | lincRNA              | 22,40 | 6,23E-03  |
| ENSG00000226453 | ENSG00000226453 | 6  | 81845185  | 81933480  | lincRNA              | 22,26 | 0         |
| ENSG00000258903 | ENSG00000258903 | 14 | 62103378  | 62117175  | lincRNA              | 22,16 | 0,1187106 |
| ENSG00000259941 | ENSG00000259941 | 15 | 56394321  | 56396785  | lincRNA              | 22,14 | 2,95E-02  |
| ENSG00000250921 | ENSG00000250921 | 5  | 4135682   | 4143648   | lincRNA              | 22,00 | 0,1217903 |
| ENSG00000247400 | DNAJC3-AS1      | 13 | 95648733  | 95676925  | lincRNA              | 21,94 | 0,0358681 |
| ENSG00000253968 | ENSG00000253968 | 5  | 173414035 | 173451165 | lincRNA              | 21,90 | 0,1217903 |
| ENSG00000145063 | ENSG00000145063 | 2  | 11105317  | 11132821  | lincRNA              | 21,90 | 2,95E-02  |
| ENSG00000234235 | BOK-AS1         | 2  | 241544403 | 241558977 | antisense            | 21,84 | 0         |
| ENSG00000244342 | LINC00698       | 3  | 62950430  | 63125062  | lincRNA              | 21,82 | 0         |
| ENSG00000232271 | ENSG00000232271 | 20 | 7069614   | 7146656   | lincRNA              | 21,70 | 6,23E-03  |
| ENSG00000258231 | ENSG00000258231 | 12 | 58544124  | 58813060  | lincRNA              | 21,70 | 0         |
| ENSG00000230013 | ENSG00000230013 | 9  | 104990796 | 104991781 | lincRNA              | 21,70 | 6,23E-03  |
| ENSG00000227087 | RBMX2P5         | 5  | 80331573  | 80332541  | processed_pseudogen  | 21,62 | 3,27E-03  |
| ENSG00000246225 | ENSG00000246225 | 11 | 22829380  | 22945393  | antisense            | 21,61 | 2,95E-02  |
| ENSG00000225243 | ENSG00000225243 | 1  | 171199244 | 171227788 | antisense            | 21,50 | 0,4036702 |
| ENSG00000230227 | SIAH1P1         | X  | 35626142  | 35627064  | processed_pseudogen  | 21,50 | 0,5865398 |
| ENSG00000250786 | SNHG18          | 5  | 9546200   | 9550609   | lincRNA              | 21,49 | 0         |
| ENSG00000236714 | ENSG00000236714 | 5  | 142745600 | 142760998 | lincRNA              | 21,20 | 2,95E-02  |
| ENSG00000273341 | ENSG00000273341 | 7  | 77416673  | 77425443  | lincRNA              | 21,15 | 6,23E-03  |
| ENSG00000267251 | ENSG00000267251 | 18 | 80183680  | 80202992  | antisense            | 21,12 | 0         |
| ENSG00000230368 | FAM41C          | 1  | 868071    | 876903    | lincRNA              | 21,10 | 0         |
| ENSG00000260923 | ENSG00000260923 | 16 | 90185997  | 90222678  | lincRNA              | 21,03 | 0         |
| ENSG00000271109 | ENSG00000271109 | 19 | 34849278  | 34860576  | lincRNA              | 21,00 | 6,23E-03  |

|                 |                 |    |           |           |                       |       |           |
|-----------------|-----------------|----|-----------|-----------|-----------------------|-------|-----------|
| ENSG00000254902 | ANO1-AS1        | 11 | 70187788  | 70188509  | antisense             | 21,00 | 0         |
| ENSG00000224475 | ENSG00000224475 | 7  | 97200708  | 97201483  | processed_pseudogen   | 21,00 | 2,95E-02  |
| ENSG00000237031 | ENSG00000237031 | 2  | 80572681  | 80618777  | antisense             | 20,84 | 3,27E-03  |
| ENSG00000225532 | ENSG00000225532 | 6  | 170736173 | 170737777 | lincRNA               | 20,70 | 6,23E-03  |
| ENSG00000255308 | ENSG00000255308 | 11 | 19196775  | 19281426  | antisense             | 20,69 | 0         |
| ENSG00000272595 | OR10AH1P        | 7  | 5117169   | 5118087   | unprocessed_pseudogen | 20,60 | 0,1217903 |
| ENSG00000265489 | ENSG00000265489 | 17 | 12760140  | 12790242  | antisense             | 20,56 | 4,86E-02  |
| ENSG00000258770 | ENSG00000258770 | 14 | 87634379  | 87655294  | lincRNA               | 20,52 | 0         |
| ENSG00000248801 | C8orf34-AS1     | 8  | 68303468  | 68331491  | antisense             | 20,50 | 0,5865398 |
| ENSG00000214998 | CCNB2P1         | 7  | 7909300   | 7910449   | processed_pseudogen   | 20,46 | 0,6526668 |
| ENSG00000258979 | ENSG00000258979 | 14 | 96741191  | 96790613  | lincRNA               | 20,40 | 0         |
| ENSG00000260661 | ENSG00000260661 | 15 | 92148752  | 92331037  | antisense             | 20,39 | 4,86E-02  |
| ENSG00000120055 | C10orf95        | 10 | 102449837 | 102451543 | lincRNA               | 20,20 | 3,27E-03  |
| ENSG00000267669 | ENSG00000267669 | 18 | 59821040  | 59825261  | transcribed_processed | 20,20 | 6,23E-03  |
| ENSG00000224885 | TSSC1-IT1       | 2  | 3298341   | 3301465   | sense_intronic        | 20,20 | 0         |
| ENSG00000254331 | CKS1BP7         | 8  | 80644939  | 80645173  | processed_pseudogen   | 20,11 | 0         |
| ENSG00000282199 | ENSG00000282199 | 17 | 43914433  | 43923001  | processed_transcript  | 20,10 | 2,95E-02  |
| ENSG00000258631 | ENSG00000258631 | 15 | 93589867  | 93760799  | lincRNA               | 20,10 | 2,95E-02  |
| ENSG00000232591 | ENSG00000232591 | 10 | 7445558   | 7471942   | lincRNA               | 20,10 | 2,95E-02  |
| ENSG00000248901 | ENSG00000248901 | 5  | 98086260  | 98161193  | lincRNA               | 20,10 | 0         |
| ENSG00000225356 | ENSG00000225356 | 4  | 181522666 | 181523001 | processed_pseudogen   | 20,10 | 0,8926569 |
| ENSG00000250102 | ENSG00000250102 | 4  | 131380013 | 131541397 | lincRNA               | 20,10 | 6,23E-03  |
| ENSG00000248150 | ENSG00000248150 | 5  | 16373361  | 16440081  | lincRNA               | 20,09 | 4,86E-02  |
| ENSG00000276166 | ENSG00000276166 | 16 | 57759358  | 57760024  | antisense             | 19,99 | 0,3565078 |
| ENSG00000260205 | ENSG00000260205 | 10 | 22218074  | 22221168  | lincRNA               | 19,80 | 0,1217903 |
| ENSG00000258791 | LINC00520       | 14 | 55781135  | 55796688  | lincRNA               | 19,75 | 1,8851183 |
| ENSG00000159712 | ANKRD18CP       | 9  | 97156570  | 97221235  | unprocessed_pseudogen | 19,75 | 0,2746192 |
| ENSG00000246662 | LINC00535       | 8  | 93213302  | 93700433  | antisense             | 19,75 | 9,18E-02  |
| ENSG00000223813 | ENSG00000223813 | 7  | 29514225  | 29563670  | antisense             | 19,75 | 0         |
| ENSG00000254367 | ENSG00000254367 | 8  | 8723693   | 8782479   | lincRNA               | 19,64 | 4,86E-02  |
| ENSG00000224652 | LINC00885       | 3  | 196142636 | 196160890 | lincRNA               | 19,60 | 0,1217903 |
| ENSG00000261596 | ENSG00000261596 | 16 | 21626742  | 21627569  | sense_intronic        | 19,50 | 0,1217903 |
| ENSG00000261303 | ENSG00000261303 | 15 | 78660644  | 78735495  | transcribed_unproces  | 19,50 | 2,95E-02  |
| ENSG00000228918 | LINC01344       | 1  | 182129310 | 182314061 | lincRNA               | 19,50 | 0,8926569 |
| ENSG00000249345 | ENSG00000249345 | 12 | 126915203 | 127060401 | lincRNA               | 19,41 | 0         |
| ENSG00000255129 | ENSG00000255129 | 11 | 113278437 | 113314437 | antisense             | 19,30 | 6,23E-03  |
| ENSG00000254575 | ENSG00000254575 | 8  | 14161297  | 14165359  | antisense             | 19,30 | 1,8851183 |
| ENSG00000214295 | FOXO1B          | 5  | 181099140 | 181100666 | processed_pseudogen   | 19,30 | 2,95E-02  |
| ENSG00000249203 | ENSG00000249203 | 5  | 44495618  | 44510282  | lincRNA               | 19,30 | 0,8926569 |
| ENSG00000203386 | LINC01317       | 2  | 33706886  | 34297753  | lincRNA               | 19,30 | 2,95E-02  |
| ENSG00000237251 | ENSG00000237251 | 7  | 39816549  | 39868140  | unprocessed_pseudogen | 19,20 | 6,23E-03  |
| ENSG00000251574 | ENSG00000251574 | 5  | 104383298 | 105392970 | lincRNA               | 19,20 | 6,23E-03  |
| ENSG00000274961 | ENSG00000274961 | 20 | 59123404  | 59147026  | lincRNA               | 19,10 | 6,23E-03  |
| ENSG00000255740 | ENSG00000255740 | 12 | 16786762  | 16787845  | lincRNA               | 18,90 | 0         |
| ENSG00000230836 | LINC01293       | 2  | 74940258  | 74942670  | lincRNA               | 18,90 | 2,95E-02  |
| ENSG00000226522 | ENSG00000226522 | 7  | 18892096  | 18899433  | antisense             | 18,80 | 2,95E-02  |
| ENSG00000270087 | ENSG00000270087 | 10 | 75279726  | 75401246  | lincRNA               | 18,60 | 0,1217903 |
| ENSG00000223795 | ENSG00000223795 | 9  | 134505472 | 134521442 | lincRNA               | 18,50 | 1,40E-02  |
| ENSG00000272851 | ENSG00000272851 | 2  | 207753872 | 207754435 | antisense             | 18,40 | 2,21E-02  |
| ENSG00000231842 | ENSG00000231842 | 6  | 126177193 | 126202239 | lincRNA               | 18,38 | 0,3565078 |
| ENSG00000267374 | ENSG00000267374 | 18 | 39206924  | 39800318  | lincRNA               | 18,36 | 0         |
| ENSG00000224404 | ENSG00000224404 | 22 | 34208141  | 34209262  | lincRNA               | 18,30 | 2,95E-02  |
| ENSG00000249738 | ENSG00000249738 | 5  | 159310933 | 159451999 | lincRNA               | 18,30 | 0,1217903 |
| ENSG00000230214 | FTLP18          | 1  | 36630335  | 36630857  | processed_pseudogen   | 18,30 | 6,23E-03  |
| ENSG00000266304 | ENSG00000266304 | 18 | 70335929  | 70337310  | lincRNA               | 18,20 | 0,4036702 |
| ENSG00000254146 | HMGB1P46        | 8  | 107173200 | 107173809 | processed_pseudogen   | 18,20 | 2,95E-02  |
| ENSG00000256304 | CCDC150P1       | 12 | 122322122 | 122324336 | processed_pseudogen   | 18,16 | 0,8926569 |
| ENSG00000269303 | ENSG00000269303 | 19 | 34998233  | 35000170  | antisense             | 18,10 | 6,23E-03  |
| ENSG00000206120 | EGFEM1P         | 3  | 168249522 | 168830599 | unitary_pseudogene    | 18,00 | 2,95E-02  |

|                 |                 |    |           |           |                       |       |           |
|-----------------|-----------------|----|-----------|-----------|-----------------------|-------|-----------|
| ENSG00000280580 | ENSG00000280580 | 13 | 68878380  | 68893573  | lincRNA               | 17,90 | 0,1217903 |
| ENSG00000249645 | ENSG00000249645 | 4  | 23105502  | 23123487  | lincRNA               | 17,90 | 0         |
| ENSG00000243744 | ENSG00000243744 | 5  | 13637919  | 13638381  | processed_pseudogen   | 17,85 | 0,2746192 |
| ENSG00000264964 | ENSG00000264964 | 18 | 9315194   | 9334441   | lincRNA               | 17,82 | 0         |
| ENSG00000267710 | ENSG00000267710 | 19 | 56272769  | 56310450  | processed_transcript  | 17,78 | 0,1217903 |
| ENSG00000276688 | ENSG00000276688 | 20 | 5407564   | 5407876   | lincRNA               | 17,70 | 2,95E-02  |
| ENSG00000237268 | ENSG00000237268 | 7  | 56421857  | 56448375  | transcribed_unproces  | 17,64 | 0,1836819 |
| ENSG00000242440 | ENSG00000242440 | 3  | 148280891 | 148399956 | lincRNA               | 17,60 | 2,95E-02  |
| ENSG00000264775 | PPIAP14         | 18 | 5002759   | 5003254   | processed_pseudogen   | 17,45 | 0,1836819 |
| ENSG00000233891 | ENSG00000233891 | 2  | 59238714  | 59733396  | lincRNA               | 17,40 | 0,1217903 |
| ENSG00000205918 | PDPK2P          | 16 | 2616121   | 2643296   | transcribed_unproces  | 17,39 | 0,4036702 |
| ENSG00000276403 | ENSG00000276403 | 18 | 58476191  | 58477484  | lincRNA               | 17,36 | 0,0358681 |
| ENSG00000258751 | ENSG00000258751 | 14 | 48396508  | 48491767  | lincRNA               | 17,30 | 0,1217903 |
| ENSG00000205035 | ENSG00000205035 | 11 | 49558546  | 49810419  | transcribed_unproces  | 17,30 | 0,4036702 |
| ENSG00000216471 | RPSAP43         | 6  | 114084168 | 114084792 | processed_pseudogen   | 17,20 | 2,95E-02  |
| ENSG00000258998 | ENSG00000258998 | 14 | 44763157  | 44782829  | lincRNA               | 17,10 | 6,23E-03  |
| ENSG00000258445 | ENSG00000258445 | 14 | 60779978  | 60780595  | processed_pseudogen   | 17,05 | 0         |
| ENSG00000258807 | ENSG00000258807 | 14 | 87710419  | 87872291  | lincRNA               | 16,98 | 6,23E-03  |
| ENSG00000258969 | ENSG00000258969 | 14 | 43995781  | 44384545  | lincRNA               | 16,90 | 2,95E-02  |
| ENSG00000250342 | SNRPCP16        | 4  | 9051842   | 9052051   | processed_pseudogen   | 16,88 | 0,5502547 |
| ENSG00000188511 | C22orf34        | 22 | 49414524  | 49657542  | lincRNA               | 16,73 | 0         |
| ENSG00000265992 | ESRG            | 3  | 54632122  | 54639857  | sense_intronic        | 16,70 | 0,1217903 |
| ENSG00000238105 | GOLGA2P5        | 12 | 100156357 | 100173659 | transcribed_unproces  | 16,53 | 6,23E-03  |
| ENSG00000250198 | ENSG00000250198 | 5  | 8839732   | 8881525   | lincRNA               | 16,50 | 0,1217903 |
| ENSG00000232893 | IQCA1-AS1       | 2  | 236391074 | 236392388 | antisense             | 16,43 | 0,5682268 |
| ENSG00000261127 | ENSG00000261127 | 16 | 32289547  | 32310555  | transcribed_processed | 16,40 | 0         |
| ENSG00000178412 | ENSG00000178412 | 18 | 79638928  | 79679745  | lincRNA               | 16,28 | 3,27E-03  |
| ENSG00000204929 | ENSG00000204929 | 2  | 65436711  | 66084639  | lincRNA               | 16,27 | 0,6526668 |
| ENSG00000213194 | ENSG00000213194 | 2  | 157210847 | 157211539 | processed_pseudogen   | 16,26 | 1,95E-02  |
| ENSG00000259380 | ENSG00000259380 | 15 | 38139595  | 38226887  | lincRNA               | 16,10 | 0,5865398 |
| ENSG00000276476 | LINC00540       | 13 | 22040975  | 22276524  | lincRNA               | 16,10 | 0,1217903 |
| ENSG00000270405 | ENSG00000270405 | 7  | 152366763 | 152367015 | processed_pseudogen   | 16,05 | 0,1392851 |
| ENSG00000256278 | ENSG00000256278 | 15 | 84611689  | 84614969  | antisense             | 15,90 | 0         |
| ENSG00000227863 | ENSG00000227863 | 7  | 89443974  | 89494262  | lincRNA               | 15,90 | 0         |
| ENSG00000241048 | ENSG00000241048 | 3  | 150202174 | 150225190 | lincRNA               | 15,90 | 0,1217903 |
| ENSG00000215533 | LINC00189       | 21 | 29193480  | 29288205  | sense_overlapping     | 15,80 | 0         |
| ENSG00000226401 | ENSG00000226401 | 7  | 63632608  | 63636617  | unprocessed_pseudog   | 15,80 | 0,4036702 |
| ENSG00000237039 | ENSG00000237039 | 2  | 231256097 | 231256306 | processed_pseudogen   | 15,76 | 0,4332376 |
| ENSG00000243836 | WDR86-AS1       | 7  | 151409161 | 151413354 | processed_transcript  | 15,75 | 6,23E-03  |
| ENSG00000257543 | ENSG00000257543 | 12 | 101408372 | 101409060 | lincRNA               | 15,74 | 0         |
| ENSG00000234948 | LINC01524       | 20 | 52210645  | 52650431  | lincRNA               | 15,70 | 2,95E-02  |
| ENSG00000258449 | ENSG00000258449 | 12 | 25096868  | 25100980  | antisense             | 15,69 | 0         |
| ENSG00000225706 | PTPRD-AS1       | 9  | 8858130   | 8862255   | lincRNA               | 15,63 | 3,27E-03  |
| ENSG00000253622 | ENSG00000253622 | 8  | 117128455 | 117130299 | sense_intronic        | 15,60 | 0         |
| ENSG00000228361 | ENSG00000228361 | 6  | 168229732 | 168240715 | lincRNA               | 15,60 | 0,1217903 |
| ENSG00000249307 | LINC01088       | 4  | 78971748  | 79308798  | antisense             | 15,57 | 0,3565078 |
| ENSG00000250313 | ENSG00000250313 | 5  | 66507544  | 66511604  | lincRNA               | 15,50 | 0,4036702 |
| ENSG00000273891 | ENSG00000273891 | 10 | 121965764 | 121967700 | antisense             | 15,46 | 0         |
| ENSG00000261837 | ENSG00000261837 | 16 | 78534374  | 78535648  | sense_intronic        | 15,40 | 2,95E-02  |
| ENSG00000276742 | ENSG00000276742 | 10 | 121956782 | 121957098 | antisense             | 15,37 | 0,4036702 |
| ENSG00000243453 | COX7BP1         | 22 | 35194699  | 35194942  | processed_pseudogen   | 15,30 | 2,95E-02  |
| ENSG00000235531 | MSC-AS1         | 8  | 71828167  | 72118393  | antisense             | 15,26 | 2,95E-02  |
| ENSG00000230115 | TPRG1-AS2       | 3  | 189238686 | 189240594 | antisense             | 15,22 | 0         |
| ENSG00000281460 | ENSG00000281460 | 20 | 48476999  | 48477553  | lincRNA               | 15,20 | 6,23E-03  |
| ENSG00000257737 | ENSG00000257737 | 12 | 103654780 | 103657995 | antisense             | 15,20 | 2,95E-02  |
| ENSG00000281641 | SAMD12-AS1      | 8  | 118621001 | 118858218 | lincRNA               | 15,10 | 0         |
| ENSG00000231200 | ENSG00000231200 | 2  | 21933336  | 22531105  | lincRNA               | 15,10 | 2,95E-02  |
| ENSG00000253932 | ENSG00000253932 | 8  | 13338574  | 13342754  | antisense             | 15,00 | 2,95E-02  |
| ENSG00000214106 | PAXIP1-AS2      | 7  | 154928498 | 154949908 | antisense             | 14,88 | 0         |

|                 |                 |    |           |           |                      |       |           |
|-----------------|-----------------|----|-----------|-----------|----------------------|-------|-----------|
| ENSG00000251331 | ENSG00000251331 | 4  | 81602797  | 82044244  | lincRNA              | 14,80 | 2,95E-02  |
| ENSG00000218690 | HIST1H2APS4     | 6  | 26272021  | 26272701  | transcribed_unproces | 14,75 | 0,2746192 |
| ENSG00000253773 | C8orf37-AS1     | 8  | 95204456  | 95810136  | lincRNA              | 14,74 | 0         |
| ENSG00000237919 | ENSG00000237919 | 1  | 70013982  | 70031222  | antisense            | 14,70 | 2,95E-02  |
| ENSG00000224189 | HAGLR           | 2  | 176173195 | 176188958 | antisense            | 14,69 | 0         |
| ENSG00000254731 | ENSG00000254731 | 11 | 86703099  | 86714092  | lincRNA              | 14,67 | 0,3565078 |
| ENSG00000204241 | ENSG00000204241 | 11 | 134032272 | 134046849 | lincRNA              | 14,63 | 0,8926569 |
| ENSG00000236231 | ENSG00000236231 | 2  | 176524879 | 176531683 | lincRNA              | 14,60 | 6,23E-03  |
| ENSG00000226798 | ENSG00000226798 | 9  | 80869758  | 80871295  | lincRNA              | 14,50 | 0,4036702 |
| ENSG00000250384 | UBE2CP3         | 4  | 57072683  | 57073132  | processed_pseudoger  | 14,50 | 0,4036702 |
| ENSG00000224227 | OR2L1P          | 1  | 247990267 | 247991204 | unprocessed_pseudog  | 14,50 | 0,4036702 |
| ENSG00000234523 | NDUFB1P2        | 1  | 222945725 | 222945900 | processed_pseudoger  | 14,45 | 6,23E-03  |
| ENSG00000259664 | ENSG00000259664 | 15 | 97370371  | 97521811  | lincRNA              | 14,40 | 2,95E-02  |
| ENSG00000255354 | ENSG00000255354 | 8  | 11558466  | 11560020  | antisense            | 14,38 | 0         |
| ENSG00000267593 | ENSG00000267593 | 18 | 58813880  | 58834364  | lincRNA              | 14,30 | 0,4036702 |
| ENSG00000214281 | HMG2P39         | 13 | 59010332  | 59010604  | processed_pseudoger  | 14,30 | 2,95E-02  |
| ENSG00000282221 | ENSG00000282221 | 1  | 201399633 | 201401190 | antisense            | 14,30 | 0,1217903 |
| ENSG00000266357 | ENSG00000266357 | 17 | 74043452  | 74154212  | lincRNA              | 14,10 | 0,8926569 |
| ENSG00000225249 | LINC00378       | 13 | 60685199  | 60694528  | lincRNA              | 14,10 | 2,95E-02  |
| ENSG00000271860 | ENSG00000271860 | 6  | 97283303  | 98399872  | lincRNA              | 14,10 | 0,1217903 |
| ENSG00000251611 | ENSG00000251611 | 4  | 151407551 | 151408835 | lincRNA              | 14,10 | 2,95E-02  |
| ENSG00000228569 | ENSG00000228569 | 7  | 156432523 | 156435833 | lincRNA              | 14,08 | 0,2746192 |
| ENSG00000243004 | ENSG00000243004 | 7  | 19918981  | 20140453  | sense_overlapping    | 14,05 | 6,23E-03  |
| ENSG00000267783 | ENSG00000267783 | 19 | 14119106  | 14119537  | antisense            | 14,00 | 0,0358681 |
| ENSG00000261801 | LOXL1-AS1       | 15 | 73908071  | 73928248  | antisense            | 14,00 | 1,40E-02  |
| ENSG00000248457 | ENSG00000248457 | 5  | 12914068  | 13032886  | lincRNA              | 14,00 | 0,4036702 |
| ENSG00000251003 | ZFPM2-AS1       | 8  | 105780246 | 106060524 | processed_transcript | 13,85 | 4,86E-02  |
| ENSG00000226608 | FTLP3           | 20 | 4023917   | 4024444   | processed_pseudoger  | 13,84 | 0         |
| ENSG00000233052 | ENSG00000233052 | 10 | 1361001   | 1361637   | sense_intronic       | 13,80 | 6,23E-03  |
| ENSG00000250546 | ENSG00000250546 | 4  | 83796436  | 84293412  | processed_transcript | 13,80 | 2,95E-02  |
| ENSG00000248459 | ENSG00000248459 | 3  | 129998531 | 129998936 | processed_pseudoger  | 13,80 | 0,5865398 |
| ENSG00000259961 | ENSG00000259961 | 1  | 13513220  | 13516270  | antisense            | 13,79 | 0,1217903 |
| ENSG00000231312 | ENSG00000231312 | 2  | 39436637  | 39665343  | antisense            | 13,76 | 0         |
| ENSG00000269667 | ENSG00000269667 | 16 | 85981750  | 85984723  | lincRNA              | 13,70 | 6,23E-03  |
| ENSG00000227463 | ENSG00000227463 | 9  | 84063443  | 84094577  | lincRNA              | 13,70 | 6,23E-03  |
| ENSG00000226272 | ARHGAP26-AS1    | 5  | 142859604 | 142868922 | antisense            | 13,60 | 6,23E-03  |
| ENSG00000236264 | RPL26P30        | 11 | 2335132   | 2335776   | transcribed_processe | 13,57 | 0         |
| ENSG00000259734 | ENSG00000259734 | 15 | 86630266  | 86631136  | antisense            | 13,50 | 0         |
| ENSG00000254076 | ENSG00000254076 | 8  | 137696724 | 137698467 | processed_pseudoger  | 13,50 | 0,1217903 |
| ENSG00000259929 | ENSG00000259929 | 16 | 17933189  | 18151595  | lincRNA              | 13,45 | 0         |
| ENSG00000261276 | ENSG00000261276 | 11 | 69004394  | 69005100  | antisense            | 13,42 | 6,23E-03  |
| ENSG00000248714 | ENSG00000248714 | 17 | 49361165  | 49369998  | lincRNA              | 13,36 | 0,2746192 |
| ENSG00000227303 | ENSG00000227303 | X  | 143284977 | 143516803 | antisense            | 13,33 | 0,0358681 |
| ENSG00000250149 | ENSG00000250149 | 4  | 125676718 | 125752793 | lincRNA              | 13,30 | 6,23E-03  |
| ENSG00000236056 | GAPDHP14        | 21 | 29222321  | 29223257  | processed_pseudoger  | 13,29 | 0,3565078 |
| ENSG00000267098 | ENSG00000267098 | 18 | 60630167  | 60902726  | lincRNA              | 13,20 | 0,4036702 |
| ENSG00000226709 | FGF12-AS3       | 3  | 192516831 | 192521398 | antisense            | 13,20 | 2,95E-02  |
| ENSG00000225843 | NIPA2P1         | 7  | 91320128  | 91321103  | processed_pseudoger  | 13,10 | 2,95E-02  |
| ENSG00000248425 | ENSG00000248425 | 4  | 14390439  | 14393992  | lincRNA              | 13,10 | 0         |
| ENSG00000231714 | ENSG00000231714 | 1  | 194350943 | 194352426 | lincRNA              | 13,10 | 0,1217903 |
| ENSG00000280013 | ENSG00000280013 | 21 | 6008604   | 6008810   | processed_pseudoger  | 13,00 | 6,23E-03  |
| ENSG00000260516 | ENSG00000260516 | 16 | 32356981  | 32363695  | unprocessed_pseudog  | 13,00 | 2,95E-02  |
| ENSG00000250654 | ENSG00000250654 | 12 | 54076838  | 54081903  | transcribed_unproces | 13,00 | 2,21E-02  |
| ENSG00000249951 | ENSG00000249951 | 4  | 94675245  | 94702570  | lincRNA              | 13,00 | 0,4036702 |
| ENSG00000231758 | ENSG00000231758 | 2  | 143640756 | 143656179 | antisense            | 12,91 | 6,23E-03  |
| ENSG00000234723 | ENSG00000234723 | 3  | 22670201  | 22670711  | unprocessed_pseudog  | 12,90 | 0,8926569 |
| ENSG00000231007 | CDC20P1         | 9  | 87011652  | 87013151  | processed_pseudoger  | 12,85 | 0         |
| ENSG00000269072 | ENSG00000269072 | 19 | 51152923  | 51181966  | antisense            | 12,82 | 0         |
| ENSG00000256199 | ENSG00000256199 | 12 | 64507166  | 64533638  | lincRNA              | 12,80 | 2,95E-02  |

|                 |                 |    |           |           |                       |       |           |
|-----------------|-----------------|----|-----------|-----------|-----------------------|-------|-----------|
| ENSG00000260183 | ENSG00000260183 | 16 | 80547842  | 80552514  | antisense             | 12,64 | 0,7582127 |
| ENSG00000258732 | ENSG00000258732 | 15 | 22278971  | 22282872  | unprocessed_pseudoge  | 12,63 | 0         |
| ENSG00000259033 | ENSG00000259033 | 14 | 70275296  | 70291859  | lincRNA               | 12,60 | 0,1217903 |
| ENSG00000227564 | LINC00376       | 13 | 63183101  | 63328094  | lincRNA               | 12,60 | 0,4036702 |
| ENSG00000234763 | ENSG00000234763 | 6  | 8341937   | 8343021   | lincRNA               | 12,60 | 6,23E-03  |
| ENSG00000266579 | ENSG00000266579 | 6  | 57493855  | 57497691  | lincRNA               | 12,60 | 0,1217903 |
| ENSG00000248431 | ENSG00000248431 | 4  | 162740668 | 162742048 | lincRNA               | 12,60 | 0,4036702 |
| ENSG00000235729 | ENSG00000235729 | X  | 143806391 | 143806733 | processed_pseudoger   | 12,50 | 2,95E-02  |
| ENSG00000249867 | ENSG00000249867 | 11 | 28702615  | 29063821  | lincRNA               | 12,46 | 2,21E-02  |
| ENSG00000228559 | ENSG00000228559 | 6  | 35544632  | 35545669  | lincRNA               | 12,44 | 6,23E-03  |
| ENSG00000258168 | ENSG00000258168 | 12 | 70468080  | 70543040  | antisense             | 12,43 | 0         |
| ENSG00000257035 | ENSG00000257035 | 12 | 127624153 | 127626267 | unprocessed_pseudoge  | 12,40 | 0,5865398 |
| ENSG00000224091 | ENSG00000224091 | 11 | 5205041   | 5207308   | antisense             | 12,40 | 6,23E-03  |
| ENSG00000264272 | ENSG00000264272 | 17 | 74256896  | 74262020  | antisense             | 12,32 | 1,40E-02  |
| ENSG00000258343 | ENSG00000258343 | 12 | 95795345  | 95858839  | antisense             | 12,20 | 0,4036702 |
| ENSG00000248424 | OR51K1P         | 11 | 5430653   | 5431602   | unitary_pseudogene    | 12,20 | 2,95E-02  |
| ENSG00000229559 | ENSG00000229559 | 6  | 37543553  | 37547280  | transcribed_procresse | 12,20 | 0         |
| ENSG00000254486 | ENSG00000254486 | 11 | 12030875  | 12061785  | lincRNA               | 12,14 | 0,2746192 |
| ENSG00000237224 | ENSG00000237224 | 10 | 129693722 | 129702117 | antisense             | 12,10 | 2,95E-02  |
| ENSG00000272343 | ENSG00000272343 | 8  | 56222688  | 56223173  | lincRNA               | 12,08 | 0,3565078 |
| ENSG00000241388 | HNF1A-AS1       | 12 | 120941728 | 120980965 | processed_transcript  | 12,00 | 0,4036702 |
| ENSG00000274797 | ENSG00000274797 | 12 | 50953924  | 50954356  | antisense             | 12,00 | 0,4036702 |
| ENSG00000226598 | ENSG00000226598 | 7  | 17463445  | 17558909  | lincRNA               | 12,00 | 6,23E-03  |
| ENSG00000226919 | ENSG00000226919 | 1  | 240765557 | 240768680 | antisense             | 11,92 | 0,6526668 |
| ENSG00000248973 | ENSG00000248973 | 5  | 4451930   | 4866221   | lincRNA               | 11,90 | 0         |
| ENSG00000250327 | RPSAP70         | 4  | 186157896 | 186158843 | processed_pseudoger   | 11,89 | 0,2746192 |
| ENSG00000233005 | ENSG00000233005 | 2  | 21221175  | 21970959  | lincRNA               | 11,82 | 6,23E-03  |
| ENSG00000228639 | ENSG00000228639 | 17 | 72021851  | 72034092  | lincRNA               | 11,80 | 6,23E-03  |
| ENSG00000236389 | ENSG00000236389 | 6  | 134706060 | 134707349 | lincRNA               | 11,80 | 1,3038915 |
| ENSG00000227165 | WDR11-AS1       | 10 | 120761812 | 120851345 | antisense             | 11,62 | 4,86E-02  |
| ENSG00000257345 | ENSG00000257345 | 12 | 92999218  | 93019820  | lincRNA               | 11,60 | 0,5865398 |
| ENSG00000253901 | ENSG00000253901 | 8  | 91542924  | 91907619  | lincRNA               | 11,60 | 0         |
| ENSG00000256968 | SNRPEP2         | 9  | 6748703   | 6748981   | processed_pseudoger   | 11,58 | 0,1187106 |
| ENSG00000232335 | ENSG00000232335 | 1  | 35739389  | 35743576  | antisense             | 11,56 | 0,5682268 |
| ENSG00000260569 | ENSG00000260569 | 18 | 74211391  | 74240555  | lincRNA               | 11,50 | 0,4036702 |
| ENSG00000237654 | ENSG00000237654 | 11 | 131502759 | 131540867 | antisense             | 11,50 | 0,8926569 |
| ENSG00000197462 | ENSG00000197462 | 7  | 125917871 | 125933832 | lincRNA               | 11,50 | 2,95E-02  |
| ENSG00000235640 | ENSG00000235640 | 2  | 123695302 | 123697396 | processed_pseudoger   | 11,50 | 0,1217903 |
| ENSG00000261707 | ENSG00000261707 | 16 | 77741468  | 77743000  | antisense             | 11,43 | 1,95E-02  |
| ENSG00000233860 | ENSG00000233860 | 4  | 76756960  | 76758474  | antisense             | 11,43 | 0,3318209 |
| ENSG00000230666 | CEACAM22P       | 19 | 44537058  | 44620821  | transcribed_unproces  | 11,42 | 0,4909563 |
| ENSG00000258038 | ENSG00000258038 | 14 | 28830244  | 28968400  | lincRNA               | 11,40 | 2,95E-02  |
| ENSG00000274614 | ENSG00000274614 | 13 | 111182111 | 111182692 | unprocessed_pseudoge  | 11,40 | 0,5865398 |
| ENSG00000281131 | SCHLAP1         | 2  | 180692104 | 180916939 | lincRNA               | 11,40 | 0,4036702 |
| ENSG00000258776 | ENSG00000258776 | 14 | 56817570  | 56893710  | lincRNA               | 11,30 | 0,8926569 |
| ENSG00000236695 | HNRNPA1P47      | 2  | 194187379 | 194188309 | processed_pseudoger   | 11,27 | 0,3565078 |
| ENSG00000259700 | ENSG00000259700 | 15 | 48810701  | 48811909  | processed_transcript  | 11,24 | 0,2746192 |
| ENSG00000258131 | ENSG00000258131 | 12 | 96985656  | 97185609  | lincRNA               | 11,20 | 0,1217903 |
| ENSG00000249848 | ENSG00000249848 | 8  | 10336782  | 10337677  | processed_pseudoger   | 11,20 | 2,95E-02  |
| ENSG00000224016 | ENSG00000224016 | 7  | 149891191 | 149909704 | unprocessed_pseudoge  | 11,20 | 0,1217903 |
| ENSG00000248837 | ENSG00000248837 | 4  | 22997551  | 23056862  | lincRNA               | 11,20 | 2,95E-02  |
| ENSG00000259450 | ENSG00000259450 | 15 | 39188438  | 39194309  | lincRNA               | 11,14 | 0,4850164 |
| ENSG00000189212 | DPY19L2P1       | 7  | 35079989  | 35186041  | transcribed_unproces  | 11,13 | 3,27E-03  |
| ENSG00000229017 | LINC01277       | 6  | 142966421 | 143038077 | lincRNA               | 11,10 | 0,6309753 |
| ENSG00000226088 | ENSG00000226088 | 1  | 70359562  | 70360437  | antisense             | 11,10 | 1,5943798 |
| ENSG00000260592 | ENSG00000260592 | 16 | 19476916  | 19487899  | antisense             | 11,09 | 0,1836819 |
| ENSG00000230650 | ENSG00000230650 | 2  | 110360608 | 110363737 | processed_pseudoger   | 11,05 | 0,1392851 |
| ENSG00000225976 | ENSG00000225976 | 10 | 29697935  | 29698174  | processed_pseudoger   | 11,00 | 2,95E-02  |
| ENSG00000248400 | ST13P12         | 5  | 82968888  | 82977153  | processed_pseudoger   | 11,00 | 2,95E-02  |

|                 |                 |    |           |           |                         |       |           |
|-----------------|-----------------|----|-----------|-----------|-------------------------|-------|-----------|
| ENSG00000240521 | ENSG00000240521 | 3  | 148850933 | 148960112 | antisense               | 11,00 | 6,23E-03  |
| ENSG00000231040 | ENSG00000231040 | 2  | 146837749 | 146850310 | lincRNA                 | 11,00 | 0,4036702 |
| ENSG00000236240 | GPC5-IT1        | 13 | 92484606  | 92510094  | sense_intronic          | 10,90 | 0,5865398 |
| ENSG00000258084 | ENSG00000258084 | 12 | 78352519  | 78483019  | lincRNA                 | 10,90 | 6,23E-03  |
| ENSG00000235688 | ENSG00000235688 | 2  | 949627    | 950274    | antisense               | 10,89 | 2,95E-02  |
| ENSG00000272620 | AFAP1-AS1       | 4  | 7754090   | 7778928   | antisense               | 10,88 | 0         |
| ENSG00000257501 | ENSG00000257501 | 12 | 97713412  | 97761859  | transcribed_processed   | 10,87 | 0,4036702 |
| ENSG00000268686 | ENSG00000268686 | 19 | 49368705  | 49388081  | antisense               | 10,85 | 6,23E-03  |
| ENSG00000257322 | ENSG00000257322 | 12 | 93003415  | 93215679  | antisense               | 10,83 | 0,2746192 |
| ENSG00000251230 | MIR3945HG       | 4  | 184844585 | 184855751 | lincRNA                 | 10,81 | 1,95E-02  |
| ENSG00000267354 | ENSG00000267354 | 18 | 45507202  | 45550183  | sense_intronic          | 10,80 | 0,5865398 |
| ENSG00000260198 | ENSG00000260198 | 16 | 56300616  | 56302904  | sense_intronic          | 10,80 | 0,4036702 |
| ENSG00000258672 | ENSG00000258672 | 14 | 99691445  | 99693648  | lincRNA                 | 10,80 | 6,23E-03  |
| ENSG00000253400 | ENSG00000253400 | 9  | 26801733  | 26805862  | lincRNA                 | 10,80 | 0,4036702 |
| ENSG00000244998 | ENSG00000244998 | 8  | 141389939 | 141392574 | antisense               | 10,80 | 0,4036702 |
| ENSG00000253693 | ENSG00000253693 | 5  | 165349030 | 165778689 | lincRNA                 | 10,80 | 2,95E-02  |
| ENSG00000281920 | ENSG00000281920 | 2  | 65623272  | 65628424  | lincRNA                 | 10,80 | 0,5865398 |
| ENSG00000271901 | ENSG00000271901 | 13 | 34545929  | 34671182  | lincRNA                 | 10,70 | 0,1217903 |
| ENSG00000170688 | OR5E1P          | 11 | 7848700   | 7849626   | unprocessed_pseudogen   | 10,70 | 0,4036702 |
| ENSG00000251363 | ENSG00000251363 | 14 | 40954898  | 40975877  | lincRNA                 | 10,69 | 0         |
| ENSG00000254526 | ENSG00000254526 | 11 | 29159956  | 29266734  | lincRNA                 | 10,69 | 0         |
| ENSG00000238755 | ENSG00000238755 | 3  | 153384934 | 153980186 | processed_transcript    | 10,67 | 4,86E-02  |
| ENSG00000235269 | ENSG00000235269 | 14 | 53768942  | 53850882  | lincRNA                 | 10,60 | 0,1217903 |
| ENSG00000255532 | ENSG00000255532 | 11 | 49305714  | 49379669  | transcribed_unprocessed | 10,60 | 2,95E-02  |
| ENSG00000254339 | ENSG00000254339 | 8  | 114282067 | 114295839 | lincRNA                 | 10,60 | 2,95E-02  |
| ENSG00000233270 | SNRPEP4         | 19 | 5576660   | 5576938   | processed_pseudogen     | 10,58 | 0,3565078 |
| ENSG00000260936 | FTO-IT1         | 16 | 54039393  | 54040726  | sense_intronic          | 10,52 | 2,95E-02  |
| ENSG00000266988 | ENSG00000266988 | 18 | 45483345  | 45529855  | sense_intronic          | 10,50 | 2,95E-02  |
| ENSG00000273569 | ENSG00000273569 | 5  | 163855140 | 163856642 | processed_pseudogen     | 10,50 | 0,1217903 |
| ENSG00000227308 | ENSG00000227308 | 2  | 219685381 | 219737937 | lincRNA                 | 10,49 | 1,6739638 |
| ENSG00000275120 | ENSG00000275120 | 15 | 84599434  | 84606463  | antisense               | 10,47 | 0         |
| ENSG00000262358 | ENSG00000262358 | 17 | 3729361   | 3730493   | antisense               | 10,46 | 6,23E-03  |
| ENSG00000254740 | ENSG00000254740 | 11 | 119372706 | 119381613 | antisense               | 10,46 | 0,6526668 |
| ENSG00000266368 | ENSG00000266368 | 17 | 11953889  | 11977594  | antisense               | 10,40 | 2,95E-02  |
| ENSG00000282757 | DUXB            | 16 | 75694434  | 75700152  | unprocessed_pseudogen   | 10,40 | 0,1217903 |
| ENSG00000253397 | ENSG00000253397 | 8  | 27904481  | 27910310  | antisense               | 10,40 | 0         |
| ENSG00000248125 | ENSG00000248125 | 5  | 145429868 | 145451099 | lincRNA                 | 10,40 | 0,8926569 |
| ENSG00000274840 | ENSG00000274840 | 3  | 18013226  | 18041603  | lincRNA                 | 10,40 | 2,95E-02  |
| ENSG00000236230 | ENSG00000236230 | 1  | 222089169 | 222387434 | lincRNA                 | 10,40 | 0,1217903 |
| ENSG00000241358 | ENSG00000241358 | 3  | 146391363 | 146416603 | transcribed_processed   | 10,36 | 4,86E-02  |
| ENSG00000227719 | ENSG00000227719 | 7  | 8114025   | 8116561   | antisense               | 10,36 | 0         |
| ENSG00000263711 | ENSG00000263711 | 18 | 73151241  | 73264480  | processed_transcript    | 10,33 | 0         |
| ENSG00000228802 | ENSG00000228802 | 2  | 223965701 | 223967706 | antisense               | 10,33 | 1,95E-02  |
| ENSG00000234008 | PPP1R2P2        | 21 | 35887195  | 35887807  | processed_pseudogen     | 10,30 | 0,4036702 |
| ENSG00000235526 | ENSG00000235526 | 1  | 110177643 | 110178719 | antisense               | 10,30 | 0,1217903 |
| ENSG00000250033 | SLC7A11-AS1     | 4  | 138057464 | 138178177 | processed_transcript    | 10,28 | 0,2746192 |
| ENSG00000233067 | PTCHD1-AS       | X  | 22259797  | 23293146  | lincRNA                 | 10,27 | 0         |
| ENSG00000223963 | PRKRIRP8        | 1  | 240769420 | 240771534 | processed_pseudogen     | 10,23 | 0,6898868 |
| ENSG00000214043 | ENSG00000214043 | 12 | 126442481 | 126472790 | lincRNA                 | 10,20 | 0,1217903 |
| ENSG00000253627 | ENSG00000253627 | 8  | 134211865 | 134320447 | lincRNA                 | 10,20 | 0,1217903 |
| ENSG00000266466 | ENSG00000266466 | 17 | 21532974  | 21542786  | antisense               | 10,18 | 2,21E-02  |
| ENSG00000274253 | ENSG00000274253 | 15 | 22757857  | 22778741  | sense_overlapping       | 10,12 | 0,2161218 |
| ENSG00000256969 | ENSG00000256969 | 12 | 4020977   | 4026658   | lincRNA                 | 10,10 | 2,95E-02  |
| ENSG00000249815 | ENSG00000249815 | 4  | 111826881 | 112072698 | lincRNA                 | 10,10 | 0,4036702 |
| ENSG00000273063 | ENSG00000273063 | 2  | 58241349  | 58241686  | antisense               | 10,10 | 2,95E-02  |
| ENSG00000241042 | ENSG00000241042 | 1  | 59054397  | 59056049  | lincRNA                 | 10,10 | 0,4036702 |
| ENSG00000273919 | ENSG00000273919 | 13 | 53345211  | 53410880  | lincRNA                 | 10,00 | 0,1217903 |
| ENSG00000253111 | ENSG00000253111 | 8  | 125466939 | 125541373 | lincRNA                 | 10,00 | 0,2746192 |
| ENSG00000229688 | ISPD-AS1        | 7  | 16210488  | 16270604  | antisense               | 10,00 | 1,95E-02  |

|                 |                 |    |           |           |                       |      |           |
|-----------------|-----------------|----|-----------|-----------|-----------------------|------|-----------|
| ENSG00000205791 | LOH12CR2        | 12 | 12355406  | 12357067  | lincRNA               | 9,97 | 0         |
| ENSG00000213089 | PDCL3P5         | 6  | 150827663 | 150828384 | processed_pseudogen   | 9,96 | 9,18E-02  |
| ENSG00000248245 | ENSG00000248245 | 5  | 133160438 | 133224413 | antisense             | 9,95 | 6,23E-03  |
| ENSG00000170089 | ENSG00000170089 | 5  | 177809407 | 177950732 | transcribed_unprocess | 9,95 | 0         |
| ENSG00000213735 | ANAPC10P1       | 1  | 52253621  | 52254176  | processed_pseudogen   | 9,94 | 0,4036702 |
| ENSG00000267500 | ZNF887P         | 19 | 11648364  | 11652877  | transcribed_unprocess | 9,92 | 4,86E-02  |
| ENSG00000215325 | ASS1P10         | 5  | 145228811 | 145230054 | processed_pseudogen   | 9,87 | 0,1392851 |
| ENSG00000223563 | ENSG00000223563 | 21 | 26889376  | 26939742  | antisense             | 9,80 | 0,1217903 |
| ENSG00000250105 | ENSG00000250105 | 11 | 66558866  | 66560384  | lincRNA               | 9,80 | 1,3038915 |
| ENSG00000234248 | ENSG00000234248 | 10 | 6891457   | 6920472   | lincRNA               | 9,80 | 0,4036702 |
| ENSG00000227482 | ENSG00000227482 | 9  | 113650956 | 113682855 | lincRNA               | 9,80 | 0,1217903 |
| ENSG00000236719 | OVAAL           | 1  | 180558976 | 180566518 | lincRNA               | 9,80 | 0,5865398 |
| ENSG00000237464 | ENSG00000237464 | 20 | 45487613  | 45490248  | antisense             | 9,70 | 0,4036702 |
| ENSG00000258050 | ENSG00000258050 | 14 | 55196727  | 55199013  | lincRNA               | 9,70 | 0,5865398 |
| ENSG00000254277 | ENSG00000254277 | 8  | 71675300  | 71702786  | lincRNA               | 9,70 | 2,95E-02  |
| ENSG00000230404 | ENSG00000230404 | 1  | 234565298 | 234570088 | lincRNA               | 9,70 | 0,1217903 |
| ENSG00000225918 | RPL7P59         | 7  | 145039999 | 145040941 | processed_pseudogen   | 9,69 | 0,3318209 |
| ENSG00000223820 | CFL1P1          | 10 | 87817928  | 87845612  | transcribed_unprocess | 9,65 | 0         |
| ENSG00000281365 | ENSG00000281365 | 20 | 48471308  | 48472414  | lincRNA               | 9,60 | 0,5865398 |
| ENSG00000260357 | DNM1P34         | 15 | 75299953  | 75302965  | transcribed_unprocess | 9,60 | 0,1217903 |
| ENSG00000256971 | LINC00508       | 12 | 127940595 | 127950160 | lincRNA               | 9,60 | 0         |
| ENSG00000245832 | MIR4300HG       | 11 | 81879851  | 82718082  | lincRNA               | 9,60 | 0,1217903 |
| ENSG00000230033 | ENSG00000230033 | 7  | 156944721 | 156945645 | lincRNA               | 9,60 | 0,4036702 |
| ENSG00000231519 | ENSG00000231519 | 7  | 30069658  | 30075115  | antisense             | 9,58 | 0,8926569 |
| ENSG00000260372 | AQP4-AS1        | 18 | 26655742  | 27190698  | antisense             | 9,56 | 3,27E-03  |
| ENSG00000244502 | HDAC11-AS1      | 3  | 13476982  | 13480053  | antisense             | 9,55 | 0,2161218 |
| ENSG00000248356 | ENSG00000248356 | 4  | 145642336 | 145650624 | antisense             | 9,51 | 0         |
| ENSG00000228235 | ENSG00000228235 | 21 | 46052596  | 46053105  | lincRNA               | 9,50 | 0,4036702 |
| ENSG00000259995 | ENSG00000259995 | 16 | 76736342  | 76928169  | lincRNA               | 9,50 | 0,4036702 |
| ENSG00000261540 | ENSG00000261540 | 16 | 78014683  | 78059454  | antisense             | 9,50 | 0,1217903 |
| ENSG00000256923 | ENSG00000256923 | 12 | 22742582  | 22743091  | lincRNA               | 9,50 | 2,95E-02  |
| ENSG00000234710 | ENSG00000234710 | 7  | 9737322   | 9769513   | lincRNA               | 9,50 | 2,95E-02  |
| ENSG00000224478 | ENSG00000224478 | 6  | 159107791 | 159116053 | lincRNA               | 9,50 | 0,4036702 |
| ENSG00000241767 | LINC01324       | 3  | 164714095 | 164831480 | lincRNA               | 9,50 | 0,4036702 |
| ENSG00000249599 | BMPR1B-AS1      | 4  | 94743800  | 94757533  | lincRNA               | 9,49 | 1,1047191 |
| ENSG00000233838 | DPHP3P1         | 20 | 62845664  | 62845912  | processed_pseudogen   | 9,48 | 0,512233  |
| ENSG00000225077 | LINC00337       | 1  | 6236240   | 6239444   | lincRNA               | 9,47 | 0,5682268 |
| ENSG00000259259 | NPM1P42         | 15 | 72899399  | 72900260  | processed_pseudogen   | 9,44 | 0,1217903 |
| ENSG00000251031 | ENSG00000251031 | 5  | 145222610 | 145228982 | lincRNA               | 9,44 | 0,1187106 |
| ENSG00000278737 | ENSG00000278737 | 15 | 65083042  | 65083663  | lincRNA               | 9,36 | 0,1217903 |
| ENSG00000279072 | ENSG00000279072 | 7  | 56809214  | 56848800  | lincRNA               | 9,33 | 1,4448456 |
| ENSG00000255178 | ENSG00000255178 | 11 | 80751200  | 80762826  | lincRNA               | 9,30 | 6,23E-03  |
| ENSG00000261030 | ENSG00000261030 | X  | 13093660  | 13094573  | lincRNA               | 9,30 | 0,1217903 |
| ENSG00000232564 | ENSG00000232564 | 22 | 40521800  | 40526707  | antisense             | 9,23 | 0         |
| ENSG00000232518 | ENSG00000232518 | 2  | 38668202  | 38671421  | antisense             | 9,20 | 2,95E-02  |
| ENSG00000176659 | C2orf197        | 20 | 60055925  | 60072953  | lincRNA               | 9,18 | 0,0358681 |
| ENSG00000227192 | ENSG00000227192 | 6  | 143039425 | 143042324 | lincRNA               | 9,18 | 0,2161218 |
| ENSG00000251209 | LINC00923       | 15 | 97572185  | 97874550  | lincRNA               | 9,10 | 0,4036702 |
| ENSG00000261402 | ENSG00000261402 | 9  | 19926094  | 19929937  | lincRNA               | 9,08 | 0,8108966 |
| ENSG00000258733 | ENSG00000258733 | 14 | 85934710  | 86129778  | lincRNA               | 9,04 | 0,1217903 |
| ENSG00000227920 | ENSG00000227920 | 6  | 37545145  | 37550860  | lincRNA               | 9,00 | 2,95E-02  |
| ENSG00000251303 | CAB39P1         | 5  | 60630514  | 60630973  | processed_pseudogen   | 9,00 | 0,1217903 |
| ENSG00000237013 | ENSG00000237013 | 2  | 67796054  | 67825562  | lincRNA               | 9,00 | 2,95E-02  |
| ENSG00000271787 | ENSG00000271787 | 2  | 10054421  | 10054866  | antisense             | 8,96 | 3,27E-03  |
| ENSG00000259712 | ENSG00000259712 | 15 | 52056675  | 52100523  | antisense             | 8,93 | 0,6309753 |
| ENSG00000214803 | ENSG00000214803 | 8  | 124192671 | 124247398 | lincRNA               | 8,92 | 0,5682268 |
| ENSG00000258871 | ENSG00000258871 | 14 | 72552580  | 72595125  | lincRNA               | 8,91 | 6,23E-03  |
| ENSG00000259203 | ENSG00000259203 | 15 | 52801614  | 52804942  | lincRNA               | 8,90 | 0,1217903 |
| ENSG00000254381 | TUBB8P5         | 12 | 38201566  | 38203792  | unprocessed_pseudogen | 8,90 | 2,95E-02  |



|                 |                   |    |           |           |                      |      |           |
|-----------------|-------------------|----|-----------|-----------|----------------------|------|-----------|
| ENSG00000248131 | LINC01194         | 5  | 12574857  | 12804363  | lincRNA              | 8,90 | 0,1217903 |
| ENSG00000253357 | ENSG00000253357   | 5  | 167721363 | 167729124 | sense_intronic       | 8,90 | 2,95E-02  |
| ENSG00000261863 | ENSG00000261863   | 17 | 4610449   | 4617650   | lincRNA              | 8,80 | 0,1217903 |
| ENSG00000152931 | PART1             | 5  | 60487713  | 60547657  | lincRNA              | 8,80 | 6,23E-03  |
| ENSG00000232000 | CLCN3P1           | 9  | 14987302  | 15146401  | transcribed_unproces | 8,78 | 0,1217903 |
| ENSG00000258077 | ENSG00000258077   | 12 | 75563202  | 75984015  | lincRNA              | 8,77 | 1,95E-02  |
| ENSG00000255239 | TREHP1            | 11 | 118688039 | 118690600 | unprocessed_pseudoge | 8,73 | 0,0358681 |
| ENSG00000241556 | ENSG00000241556   | 12 | 95467397  | 95467861  | processed_pseudogerm | 8,71 | 2,007219  |
| ENSG00000257400 | ENSG00000257400   | 12 | 94491546  | 94496442  | lincRNA              | 8,70 | 1,3038915 |
| ENSG00000225548 | ENSG00000225548   | 3  | 27802762  | 27891301  | lincRNA              | 8,70 | 1,3038915 |
| ENSG00000261758 | ENSG00000261758   | 3  | 136752630 | 136755780 | antisense            | 8,70 | 0,4036702 |
| ENSG00000274849 | ENSG00000274849   | 18 | 36189824  | 36190272  | sense_intronic       | 8,68 | 2,95E-02  |
| ENSG00000257060 | ENSG00000257060   | 15 | 93312557  | 93569483  | lincRNA              | 8,64 | 0,1836819 |
| ENSG00000276399 | ENSG00000276399   | 17 | 22406019  | 22413744  | lincRNA              | 8,60 | 0,1217903 |
| ENSG00000254319 | ENSG00000254319   | 8  | 2666079   | 2728451   | lincRNA              | 8,60 | 0,1217903 |
| ENSG00000273272 | ENSG00000273272   | 22 | 50542650  | 50543011  | lincRNA              | 8,55 | 0,512233  |
| ENSG00000254018 | ENSG00000254018   | 8  | 121884724 | 121904273 | lincRNA              | 8,55 | 0,0358681 |
| ENSG00000272666 | ENSG00000272666   | 22 | 50542305  | 50542906  | lincRNA              | 8,54 | 0,2746192 |
| ENSG00000228923 | ENSG00000228923   | 22 | 24516508  | 24518386  | antisense            | 8,50 | 0,4036702 |
| ENSG00000230867 | ENSG00000230867   | 9  | 32727069  | 32727522  | processed_pseudogerm | 8,50 | 0,4036702 |
| ENSG00000234040 | ENSG00000234040   | 12 | 68626870  | 68627187  | processed_pseudogerm | 8,43 | 1,6174211 |
| ENSG00000229151 | ENSG00000229151 X |    | 51356944  | 51396462  | antisense            | 8,42 | 0,8926569 |
| ENSG00000261274 | TP53TG3GP         | 16 | 35207903  | 35208236  | processed_pseudogerm | 8,40 | 1,3038915 |
| ENSG00000254587 | ENSG00000254587   | 11 | 96590317  | 96713822  | lincRNA              | 8,40 | 2,95E-02  |
| ENSG00000243969 | ENSG00000243969   | 3  | 154827016 | 154861017 | lincRNA              | 8,40 | 0,5865398 |
| ENSG00000224195 | ENSG00000224195   | 10 | 73813518  | 73814737  | antisense            | 8,39 | 0,5865398 |
| ENSG00000269813 | ENSG00000269813   | 19 | 7959123   | 7960012   | antisense            | 8,34 | 3,27E-03  |
| ENSG00000261239 | ANKRD26P1         | 16 | 46469341  | 46569097  | transcribed_unproces | 8,33 | 0,5502547 |
| ENSG00000231092 | ENSG00000231092   | 2  | 216259595 | 216266130 | antisense            | 8,31 | 0,1836819 |
| ENSG00000258566 | ENSG00000258566   | 14 | 76690139  | 76690742  | processed_pseudogerm | 8,30 | 0,4036702 |
| ENSG00000258626 | COX7A2P1          | 14 | 67652300  | 67652614  | processed_pseudogerm | 8,29 | 1,40E-02  |
| ENSG00000258789 | ENSG00000258789   | 14 | 88551597  | 88552493  | antisense            | 8,29 | 0,8468482 |
| ENSG00000265750 | ENSG00000265750   | 18 | 24159509  | 24162211  | lincRNA              | 8,29 | 0         |
| ENSG00000267139 | ENSG00000267139   | 19 | 3118665   | 3119304   | antisense            | 8,28 | 0,8926569 |
| ENSG00000259240 | ENSG00000259240   | 15 | 51037488  | 51293912  | lincRNA              | 8,25 | 6,23E-03  |
| ENSG00000230863 | ENSG00000230863   | 1  | 75641346  | 75642087  | processed_pseudogerm | 8,21 | 1,6174211 |
| ENSG00000259670 | ENSG00000259670   | 15 | 48783190  | 48784121  | antisense            | 8,20 | 0,8926569 |
| ENSG00000226476 | ENSG00000226476   | 1  | 60515716  | 60640491  | lincRNA              | 8,18 | 1,1964007 |
| ENSG00000280739 | EIF1B-AS1         | 3  | 40173145  | 40309698  | processed_transcript | 8,12 | 0         |
| ENSG00000257624 | ENSG00000257624   | 12 | 112000739 | 112000985 | processed_pseudogerm | 8,12 | 1,95E-02  |
| ENSG00000249816 | LINC00964         | 8  | 124848737 | 124954328 | lincRNA              | 8,12 | 0,5502547 |
| ENSG00000255388 | ENSG00000255388   | 11 | 41518895  | 41714448  | lincRNA              | 8,10 | 0,5865398 |
| ENSG00000230196 | DDX43P3           | 7  | 81610884  | 81611326  | processed_pseudogerm | 8,10 | 0,4036702 |
| ENSG00000233085 | ENSG00000233085   | 6  | 169286534 | 169289216 | lincRNA              | 8,10 | 1,3038915 |
| ENSG00000261786 | ENSG00000261786   | 3  | 44117299  | 44122365  | lincRNA              | 8,10 | 0,1217903 |
| ENSG00000233620 | ENSG00000233620   | 1  | 216072465 | 216086917 | antisense            | 8,10 | 0,5865398 |
| ENSG00000279463 | ENSG00000279463   | 13 | 73844683  | 73845130  | sense_intronic       | 8,08 | 0,512233  |
| ENSG00000259098 | ENSG00000259098   | 15 | 22258138  | 22258848  | processed_pseudogerm | 8,07 | 1,5943798 |
| ENSG00000250027 | ENSG00000250027   | 4  | 163108785 | 163119965 | antisense            | 8,06 | 0,1187106 |
| ENSG00000249846 | ENSG00000249846   | 3  | 130112550 | 130120579 | lincRNA              | 8,03 | 0,1187106 |
| ENSG00000213609 | ENSG00000213609   | 10 | 63902451  | 63903245  | processed_pseudogerm | 8,00 | 0         |
| ENSG00000273797 | ENSG00000273797   | 14 | 69617122  | 69617648  | sense_intronic       | 8,00 | 0,8926569 |
| ENSG00000254757 | ENSG00000254757   | 11 | 3469319   | 3531328   | lincRNA              | 8,00 | 1,40E-02  |
| ENSG00000235335 | ENSG00000235335   | 2  | 167814774 | 167941144 | antisense            | 8,00 | 1,1217155 |
| ENSG00000235215 | ENSG00000235215   | 1  | 59055999  | 59078116  | lincRNA              | 8,00 | 0,5865398 |
| ENSG00000258940 | ENSG00000258940   | 14 | 39265703  | 39267061  | antisense            | 7,98 | 3,27E-03  |
| ENSG00000230562 | FAM133DP          | 2  | 157379724 | 157380414 | processed_pseudogerm | 7,97 | 1,40E-02  |
| ENSG00000228317 | ENSG00000228317   | 9  | 105554035 | 105558029 | antisense            | 7,92 | 1,5215308 |
| ENSG00000258558 | ENSG00000258558   | 14 | 30734926  | 30822702  | antisense            | 7,91 | 1,1217155 |

|                 |                 |   |    |           |           |                       |      |           |
|-----------------|-----------------|---|----|-----------|-----------|-----------------------|------|-----------|
| ENSG00000251436 | NUP58P1         |   | 4  | 125681177 | 125683668 | processed_pseudoger   | 7,90 | 0,4036702 |
| ENSG00000228262 | LINC01320       |   | 2  | 34677555  | 34738231  | lincRNA               | 7,90 | 0,1217903 |
| ENSG00000237667 | LINC01115       |   | 2  | 779840    | 868426    | lincRNA               | 7,82 | 0,2746192 |
| ENSG00000250290 | NCAPGP1         |   | 8  | 120635558 | 120638204 | processed_pseudoger   | 7,81 | 1,2188867 |
| ENSG00000254233 | ENSG00000254233 |   | 4  | 184584093 | 184625030 | lincRNA               | 7,81 | 0,5682268 |
| ENSG00000255353 | ENSG00000255353 |   | 11 | 107176286 | 107177530 | processed_pseudoger   | 7,81 | 0,1187106 |
| ENSG00000233080 | LINC01399       |   | 22 | 35119824  | 35231056  | lincRNA               | 7,80 | 0,1217903 |
| ENSG00000260123 | ENSG00000260123 |   | 15 | 89041223  | 89082819  | lincRNA               | 7,70 | 0,5865398 |
| ENSG00000255194 | SSU72P2         |   | 11 | 4242062   | 4242641   | processed_pseudoger   | 7,70 | 0,4036702 |
| ENSG00000233752 | ENSG00000233752 |   | 2  | 36299388  | 36299830  | processed_pseudoger   | 7,70 | 0,8926569 |
| ENSG00000237843 | ENSG00000237843 |   | 2  | 204475356 | 204507672 | lincRNA               | 7,70 | 0,4036702 |
| ENSG00000237742 | ENSG00000237742 |   | 6  | 125578558 | 125749190 | antisense             | 7,69 | 3,27E-03  |
| ENSG00000250619 | ENSG00000250619 |   | 5  | 9001774   | 9045940   | antisense             | 7,63 | 6,23E-03  |
| ENSG00000231731 | ENSG00000231731 |   | 2  | 127455394 | 127514623 | antisense             | 7,61 | 0,8926569 |
| ENSG00000261177 | ENSG00000261177 |   | 16 | 86081409  | 86089526  | lincRNA               | 7,60 | 6,23E-03  |
| ENSG00000270038 | ENSG00000270038 |   | 14 | 95644508  | 95645232  | lincRNA               | 7,60 | 0,8926569 |
| ENSG00000245857 | ENSG00000245857 |   | 8  | 6835554   | 6885276   | lincRNA               | 7,60 | 0,5865398 |
| ENSG00000219653 | GCNT1P4         |   | 6  | 63857441  | 63857769  | processed_pseudoger   | 7,60 | 2,95E-02  |
| ENSG00000250331 | LINC01340       |   | 5  | 97504696  | 97671046  | lincRNA               | 7,60 | 0,1217903 |
| ENSG00000251412 | ENSG00000251412 |   | 4  | 14383123  | 14409078  | lincRNA               | 7,60 | 0         |
| ENSG00000224288 | MTCYBP11        |   | 2  | 143093056 | 143094164 | processed_pseudoger   | 7,60 | 0,4036702 |
| ENSG00000214748 | ENSG00000214748 | X |    | 137324972 | 137325049 | processed_pseudoger   | 7,57 | 0,5682268 |
| ENSG00000232445 | ENSG00000232445 |   | 7  | 101308346 | 101310985 | antisense             | 7,55 | 0,4332376 |
| ENSG00000242951 | ENSG00000242951 |   | 14 | 75595805  | 75596206  | processed_pseudoger   | 7,51 | 1,8851183 |
| ENSG00000255270 | NAV2-IT1        |   | 11 | 19380484  | 19385014  | sense_intronic        | 7,50 | 4,86E-02  |
| ENSG00000255314 | ENSG00000255314 |   | 11 | 46123573  | 46177106  | lincRNA               | 7,50 | 1,3038915 |
| ENSG00000254302 | ENSG00000254302 |   | 8  | 34174886  | 34184895  | lincRNA               | 7,50 | 0,1217903 |
| ENSG00000261568 | ENSG00000261568 |   | 6  | 22220781  | 22222395  | lincRNA               | 7,50 | 0,1187106 |
| ENSG00000247345 | ENSG00000247345 |   | 5  | 59039761  | 59063503  | antisense             | 7,50 | 0,4036702 |
| ENSG00000214018 | RRM2P3          | X |    | 44309314  | 44310476  | processed_pseudoger   | 7,49 | 1,95E-02  |
| ENSG00000250030 | ENSG00000250030 |   | 4  | 67446267  | 67446574  | processed_pseudoger   | 7,47 | 0,4332376 |
| ENSG00000261200 | ENSG00000261200 |   | 16 | 33541842  | 33545812  | lincRNA               | 7,46 | 0,512233  |
| ENSG00000237872 | POU5F1P4        |   | 1  | 155433178 | 155434262 | processed_pseudoger   | 7,46 | 0,3565078 |
| ENSG00000002079 | MYH16           |   | 7  | 99238794  | 99311130  | unitary_pseudogene    | 7,45 | 0,1836819 |
| ENSG00000266826 | ENSG00000266826 |   | 17 | 58660580  | 58661599  | processed_pseudoger   | 7,45 | 6,23E-03  |
| ENSG00000213777 | ENSG00000213777 |   | 19 | 53503392  | 53512687  | transcribed_processed | 7,42 | 1,6498059 |
| ENSG00000215771 | LRRC37A14P      |   | 22 | 41189727  | 41190188  | processed_pseudoger   | 7,40 | 0,4036702 |
| ENSG00000224777 | OR4F2P          |   | 11 | 86649     | 87586     | unprocessed_pseudog   | 7,40 | 0,1217903 |
| ENSG00000251637 | ENSG00000251637 |   | 11 | 67886477  | 67906350  | lincRNA               | 7,40 | 2,21E-02  |
| ENSG00000250354 | ENSG00000250354 |   | 4  | 148146471 | 148208880 | antisense             | 7,40 | 6,23E-03  |
| ENSG00000225258 | ENSG00000225258 |   | 2  | 180571712 | 180692454 | lincRNA               | 7,40 | 0,4036702 |
| ENSG00000231386 | ENSG00000231386 |   | 2  | 70810798  | 70811474  | processed_pseudoger   | 7,38 | 1,3038915 |
| ENSG00000231822 | ENSG00000231822 |   | 2  | 99102018  | 99102752  | processed_pseudoger   | 7,36 | 6,23E-03  |
| ENSG00000235489 | DBF4P1          |   | 10 | 64168959  | 64170850  | processed_pseudoger   | 7,32 | 0,8926569 |
| ENSG00000269906 | ENSG00000269906 |   | 14 | 50662511  | 50663178  | sense_intronic        | 7,31 | 0,3565078 |
| ENSG00000258232 | ENSG00000258232 |   | 12 | 49265156  | 49273306  | antisense             | 7,30 | 6,23E-03  |
| ENSG00000223608 | DSCR4-IT1       |   | 21 | 38006544  | 38010618  | sense_intronic        | 7,30 | 0,8926569 |
| ENSG00000257119 | EEF1B2P4        |   | 12 | 106901283 | 106901984 | processed_pseudoger   | 7,30 | 2,95E-02  |
| ENSG00000231812 | SNRCP9          |   | 7  | 97885868  | 97886074  | processed_pseudoger   | 7,20 | 1,3038915 |
| ENSG00000248747 | ENSG00000248747 |   | 4  | 141240739 | 141278789 | lincRNA               | 7,20 | 0,1217903 |
| ENSG00000251513 | ENSG00000251513 |   | 5  | 97089075  | 97437217  | lincRNA               | 7,13 | 0         |
| ENSG00000253500 | ENSG00000253500 |   | 8  | 87540835  | 87755718  | antisense             | 7,10 | 0,1217903 |
| ENSG00000253880 | ENSG00000253880 |   | 8  | 6044353   | 6257537   | lincRNA               | 7,10 | 2,95E-02  |
| ENSG00000250947 | TRPC7-AS2       |   | 5  | 136303757 | 136316100 | antisense             | 7,10 | 0,1217903 |
| ENSG00000260518 | BMS1P8          |   | 16 | 33687025  | 33698504  | transcribed_unproces  | 7,07 | 0,3318209 |
| ENSG00000250910 | ENSG00000250910 |   | 4  | 155173716 | 155381694 | antisense             | 7,07 | 0,512233  |
| ENSG00000251639 | ENSG00000251639 |   | 4  | 1100016   | 1101558   | processed_pseudoger   | 7,05 | 0,2746192 |
| ENSG00000231907 | GAPDHP37        |   | 22 | 40673484  | 40674451  | processed_pseudoger   | 7,00 | 0,5865398 |
| ENSG00000269930 | ENSG00000269930 |   | 15 | 30616958  | 30617749  | lincRNA               | 7,00 | 6,23E-03  |

|                 |                 |    |           |           |                       |      |           |
|-----------------|-----------------|----|-----------|-----------|-----------------------|------|-----------|
| ENSG00000218261 | ENSG00000218261 | 6  | 53378503  | 53378861  | processed_pseudogen   | 7,00 | 1,6739638 |
| ENSG00000225744 | ENSG00000225744 | 2  | 111607841 | 111612518 | lincRNA               | 7,00 | 0,1217903 |
| ENSG00000233538 | ENSG00000233538 | 2  | 231452195 | 231453153 | lincRNA               | 7,00 | 4,86E-02  |
| ENSG00000253204 | ENSG00000253204 | 8  | 30921060  | 30921335  | processed_pseudogen   | 6,92 | 0,1187106 |
| ENSG00000244119 | PDCL3P4         | 3  | 101712472 | 101713191 | processed_pseudogen   | 6,91 | 0,1217903 |
| ENSG00000266977 | ENSG00000266977 | 19 | 27849730  | 27889222  | lincRNA               | 6,90 | 0,5865398 |
| ENSG00000228933 | ENSG00000228933 | X  | 27174920  | 27398997  | lincRNA               | 6,90 | 0,8926569 |
| ENSG00000269416 | LINC01224       | 19 | 23399233  | 23416075  | lincRNA               | 6,86 | 0,5502547 |
| ENSG00000272817 | ENSG00000272817 | 10 | 91908131  | 91909348  | antisense             | 6,85 | 0,2746192 |
| ENSG00000273816 | ENSG00000273816 | 17 | 9244666   | 9244897   | lincRNA               | 6,83 | 9,18E-02  |
| ENSG00000258933 | ENSG00000258933 | 14 | 94960277  | 94962976  | lincRNA               | 6,82 | 0,512233  |
| ENSG00000266885 | ENSG00000266885 | 17 | 22435390  | 22439033  | transcribed_processed | 6,80 | 0,1217903 |
| ENSG00000250974 | ENSG00000250974 | 5  | 6933670   | 7190812   | lincRNA               | 6,80 | 2,95E-02  |
| ENSG00000275945 | EIF3FP1         | 21 | 10330732  | 10331537  | processed_pseudogen   | 6,75 | 1,2188867 |
| ENSG00000272205 | ENSG00000272205 | 1  | 167219831 | 167220512 | lincRNA               | 6,75 | 0,5502547 |
| ENSG00000259673 | IQCH-AS1        | 15 | 67403619  | 67521844  | lincRNA               | 6,71 | 6,23E-03  |
| ENSG00000239426 | OR8F1P          | 11 | 124207183 | 124208112 | unprocessed_pseudogen | 6,70 | 0,8926569 |
| ENSG00000253584 | ENSG00000253584 | 5  | 104917492 | 105246364 | lincRNA               | 6,70 | 0,4036702 |
| ENSG00000250038 | ENSG00000250038 | 4  | 28362279  | 28402864  | lincRNA               | 6,70 | 0,5865398 |
| ENSG00000237844 | ENSG00000237844 | 2  | 163749573 | 164352223 | lincRNA               | 6,70 | 0,4036702 |
| ENSG00000231345 | BEND3P1         | 10 | 50655967  | 50660472  | transcribed_processed | 6,70 | 4,86E-02  |
| ENSG00000251405 | ENSG00000251405 | 5  | 157362615 | 157460078 | sense_overlapping     | 6,67 | 0,7367804 |
| ENSG00000275874 | LINC00162       | 21 | 44999208  | 45004727  | lincRNA               | 6,64 | 0,4909563 |
| ENSG00000265656 | ENSG00000265656 | 18 | 21673628  | 21682561  | antisense             | 6,64 | 0,1836819 |
| ENSG00000274093 | ENSG00000274093 | 16 | 69632141  | 69632571  | sense_intronic        | 6,64 | 1,1964007 |
| ENSG00000228888 | LINC01428       | 20 | 7146467   | 7254202   | lincRNA               | 6,60 | 0,1217903 |
| ENSG00000235160 | ENSG00000235160 | 15 | 26395072  | 26446774  | lincRNA               | 6,60 | 0,4036702 |
| ENSG00000235529 | AGAP1-IT1       | 2  | 235505751 | 235507566 | sense_intronic        | 6,60 | 0,1217903 |
| ENSG00000235036 | ENSG00000235036 | 20 | 10612861  | 10614229  | processed_pseudogen   | 6,57 | 2,95E-02  |
| ENSG00000205871 | RPS3AP47        | 15 | 43115702  | 43116493  | processed_pseudogen   | 6,57 | 1,1217155 |
| ENSG00000245059 | ENSG00000245059 | 16 | 81077319  | 81078861  | lincRNA               | 6,54 | 0,1392851 |
| ENSG00000259410 | ENSG00000259410 | 15 | 67832725  | 67873866  | processed_transcript  | 6,50 | 2,95E-02  |
| ENSG00000260128 | ULK4P2          | 15 | 30572738  | 30600647  | transcribed_unproces  | 6,50 | 0,1217903 |
| ENSG00000260172 | LINC01413       | 15 | 57319138  | 57323908  | lincRNA               | 6,50 | 1,3038915 |
| ENSG00000228566 | ENSG00000228566 | 10 | 63664664  | 63990568  | lincRNA               | 6,50 | 0,5865398 |
| ENSG00000248185 | ENSG00000248185 | 5  | 63301523  | 63302056  | processed_pseudogen   | 6,50 | 0,1217903 |
| ENSG00000251687 | ENSG00000251687 | 4  | 145833118 | 145839580 | antisense             | 6,50 | 0,4036702 |
| ENSG00000280634 | THRIL           | 12 | 125025434 | 125027410 | antisense             | 6,49 | 0         |
| ENSG00000248810 | ENSG00000248810 | 4  | 141319450 | 141332618 | lincRNA               | 6,46 | 0,3565078 |
| ENSG00000260790 | ENSG00000260790 | 16 | 22374859  | 22378180  | antisense             | 6,46 | 0,2746192 |
| ENSG00000273082 | ENSG00000273082 | 22 | 33922422  | 33922766  | antisense             | 6,45 | 0,1836819 |
| ENSG00000230058 | ENSG00000230058 | 13 | 40343957  | 40350303  | lincRNA               | 6,43 | 0,3318209 |
| ENSG00000261462 | ENSG00000261462 | 7  | 87109539  | 87111282  | lincRNA               | 6,42 | 0,5502547 |
| ENSG00000227011 | C17orf112       | 17 | 52985520  | 52987652  | lincRNA               | 6,40 | 0,1217903 |
| ENSG00000233928 | ENSG00000233928 | X  | 33726508  | 33942280  | lincRNA               | 6,40 | 2,95E-02  |
| ENSG00000273796 | ENSG00000273796 | 21 | 45403809  | 45404369  | lincRNA               | 6,39 | 0,1187106 |
| ENSG00000260922 | ENSG00000260922 | 16 | 77234877  | 77290934  | antisense             | 6,38 | 3,27E-03  |
| ENSG00000265334 | ENSG00000265334 | 17 | 30834325  | 30863028  | antisense             | 6,33 | 1,1047191 |
| ENSG00000203799 | CCDC162P        | 6  | 109285485 | 109355063 | unitary_pseudogene    | 6,32 | 1,40E-02  |
| ENSG00000149656 | LINC00266-1     | 20 | 64290385  | 64313132  | lincRNA               | 6,30 | 1,8851183 |
| ENSG00000255133 | ENSG00000255133 | 11 | 33814877  | 33822095  | lincRNA               | 6,30 | 0,1217903 |
| ENSG00000213067 | ENSG00000213067 | 7  | 56597379  | 56598342  | processed_pseudogen   | 6,30 | 1,3038915 |
| ENSG00000273011 | ENSG00000273011 | 7  | 149890739 | 149891416 | lincRNA               | 6,30 | 0,1217903 |
| ENSG00000250328 | ENSG00000250328 | 5  | 122436497 | 122479087 | antisense             | 6,30 | 2,95E-02  |
| ENSG00000240992 | RPS23P4         | 4  | 145269810 | 145270558 | processed_pseudogen   | 6,30 | 0,8926569 |
| ENSG00000183444 | OR7E38P         | 7  | 97966090  | 97967074  | unprocessed_pseudogen | 6,28 | 6,23E-03  |
| ENSG00000267688 | ENSG00000267688 | 19 | 3121116   | 3122128   | antisense             | 6,20 | 1,2188867 |
| ENSG00000261776 | ENSG00000261776 | 16 | 78055824  | 78056927  | processed_pseudogen   | 6,20 | 0,1217903 |
| ENSG00000258742 | ENSG00000258742 | 14 | 92886352  | 92893506  | lincRNA               | 6,20 | 2,95E-02  |

|                 |                 |    |           |           |                      |      |           |
|-----------------|-----------------|----|-----------|-----------|----------------------|------|-----------|
| ENSG00000235497 | ENSG00000235497 | 2  | 23375229  | 23381299  | lincRNA              | 6,20 | 2,95E-02  |
| ENSG00000271955 | ENSG00000271955 | 2  | 59218680  | 60100200  | lincRNA              | 6,20 | 0,5865398 |
| ENSG00000173954 | SNURFL          | X  | 139362040 | 139362382 | processed_pseudogen  | 6,20 | 0,1217903 |
| ENSG00000254042 | ENSG00000254042 | 5  | 168706567 | 168720884 | antisense            | 6,19 | 0,6526668 |
| ENSG00000236484 | RRM2P2          | 1  | 161378707 | 161379358 | processed_pseudogen  | 6,19 | 2,0633527 |
| ENSG00000261898 | ENSG00000261898 | 17 | 4731756   | 4732371   | antisense            | 6,17 | 6,23E-03  |
| ENSG00000232027 | ENSG00000232027 | 1  | 51372270  | 51373224  | processed_pseudogen  | 6,15 | 0,2161218 |
| ENSG00000266258 | ENSG00000266258 | 18 | 70335439  | 70352459  | lincRNA              | 6,14 | 1,3038915 |
| ENSG00000278981 | ENSG00000278981 | 4  | 154235980 | 154237598 | antisense            | 6,13 | 0,512233  |
| ENSG00000280356 | ENSG00000280356 | 22 | 34641179  | 34651862  | lincRNA              | 6,10 | 0,4036702 |
| ENSG00000260364 | ENSG00000260364 | 16 | 65233056  | 65432820  | lincRNA              | 6,10 | 0,1217903 |
| ENSG00000239227 | ENSG00000239227 | 3  | 166861944 | 166862110 | processed_pseudogen  | 6,10 | 0,1217903 |
| ENSG00000233540 | DNM3-IT1        | 1  | 171864187 | 171864687 | sense_intronic       | 6,10 | 1,8851183 |
| ENSG00000255655 | ENSG00000255655 | 12 | 109445410 | 109447497 | antisense            | 6,10 | 0,1217903 |
| ENSG00000279159 | ENSG00000279159 | 22 | 29978950  | 30028236  | antisense            | 6,07 | 0         |
| ENSG00000231652 | ENSG00000231652 | 6  | 73693903  | 73696131  | antisense            | 6,06 | 0,4036702 |
| ENSG00000258561 | ENSG00000258561 | 14 | 66212810  | 66509394  | lincRNA              | 6,06 | 0,4850164 |
| ENSG00000274993 | ENSG00000274993 | 7  | 100963828 | 100968124 | antisense            | 6,04 | 6,23E-03  |
| ENSG00000233766 | ENSG00000233766 | 2  | 191846539 | 192044525 | antisense            | 6,02 | 0,1836819 |
| ENSG00000261517 | LINC00558       | 13 | 53815419  | 53876119  | lincRNA              | 6,00 | 2,95E-02  |
| ENSG00000238001 | SNRPCP1         | 9  | 32676063  | 32676520  | processed_pseudogen  | 6,00 | 0,1217903 |
| ENSG00000181211 | HECW1-IT1       | 7  | 43117896  | 43163187  | sense_intronic       | 6,00 | 2,95E-02  |
| ENSG00000232627 | ENSG00000232627 | 7  | 23365618  | 23365976  | processed_pseudogen  | 6,00 | 0,8926569 |
| ENSG00000219404 | ENSG00000219404 | 6  | 22213306  | 22214237  | processed_pseudogen  | 6,00 | 0,512233  |
| ENSG00000231690 | LINC00574       | 6  | 169790321 | 169802873 | lincRNA              | 6,00 | 0,7367804 |
| ENSG00000241369 | LINC01192       | 3  | 163127923 | 163361563 | lincRNA              | 6,00 | 0,4036702 |
| ENSG00000234754 | ENSG00000234754 | 1  | 221330080 | 221336296 | lincRNA              | 6,00 | 0,5865398 |
| ENSG00000237845 | ENSG00000237845 | 1  | 235942553 | 235943805 | lincRNA              | 6,00 | 0,1836819 |
| ENSG00000238205 | MPC1L           | X  | 40623566  | 40623860  | processed_pseudogen  | 6,00 | 0,5865398 |
| ENSG00000260107 | ENSG00000260107 | 16 | 1997654   | 1998374   | lincRNA              | 5,98 | 4,86E-02  |
| ENSG00000238081 | ENSG00000238081 | 1  | 89289676  | 89290337  | processed_pseudogen  | 5,97 | 1,6174211 |
| ENSG00000267992 | ENSG00000267992 | 19 | 39030436  | 39031323  | antisense            | 5,97 | 2,0846889 |
| ENSG00000226432 | ENSG00000226432 | 5  | 24170370  | 24171246  | processed_pseudogen  | 5,96 | 3,27E-03  |
| ENSG00000260808 | ENSG00000260808 | 11 | 68612899  | 68616711  | lincRNA              | 5,94 | 3,27E-03  |
| ENSG00000251364 | ENSG00000251364 | 11 | 7427266   | 7512515   | antisense            | 5,93 | 1,5943798 |
| ENSG00000259180 | ENSG00000259180 | 15 | 55680385  | 55681463  | antisense            | 5,92 | 0,6526668 |
| ENSG00000186369 | LINC00643       | 14 | 62114353  | 62130962  | lincRNA              | 5,92 | 0,8926569 |
| ENSG00000253945 | ENSG00000253945 | 8  | 95403802  | 95403894  | processed_pseudogen  | 5,91 | 0,2746192 |
| ENSG00000225431 | ENSG00000225431 | 21 | 42599280  | 42615058  | lincRNA              | 5,90 | 0,5865398 |
| ENSG00000257587 | ENSG00000257587 | 12 | 73906940  | 73919337  | lincRNA              | 5,90 | 0,8926569 |
| ENSG00000248701 | ENSG00000248701 | 5  | 86797685  | 86800280  | lincRNA              | 5,90 | 1,3038915 |
| ENSG00000234125 | EEF1GP8         | 4  | 129903010 | 129904163 | processed_pseudogen  | 5,90 | 0,4036702 |
| ENSG00000249098 | ENSG00000249098 | 3  | 130918226 | 130919120 | processed_pseudogen  | 5,87 | 0,2746192 |
| ENSG00000225606 | ENSG00000225606 | 7  | 12570125  | 12571392  | antisense            | 5,87 | 0,4036702 |
| ENSG00000255970 | ENSG00000255970 | 12 | 67709047  | 67729475  | lincRNA              | 5,86 | 0,512233  |
| ENSG00000230711 | CTAGE13P        | 6  | 168286905 | 168289350 | processed_pseudogen  | 5,86 | 3,27E-03  |
| ENSG00000275450 | ENSG00000275450 | 9  | 41276280  | 41282846  | lincRNA              | 5,83 | 1,40E-02  |
| ENSG00000249532 | ENSG00000249532 | 4  | 112646476 | 112650051 | antisense            | 5,82 | 0,3565078 |
| ENSG00000255836 | ENSG00000255836 | 12 | 7438780   | 7439990   | processed_pseudogen  | 5,82 | 1,0789438 |
| ENSG00000233922 | ENSG00000233922 | 21 | 45593654  | 45603056  | lincRNA              | 5,81 | 7,06E-02  |
| ENSG00000242445 | RPL7AP11        | 3  | 121494110 | 121494908 | processed_pseudogen  | 5,80 | 1,40E-02  |
| ENSG00000234479 | AP1B1P1         | 22 | 32121977  | 32133469  | transcribed_unproces | 5,80 | 0,1217903 |
| ENSG00000259076 | ENSG00000259076 | 14 | 64552694  | 64596536  | antisense            | 5,80 | 1,8851183 |
| ENSG00000234551 | LINC01309       | 13 | 103425200 | 103427685 | lincRNA              | 5,80 | 0,4036702 |
| ENSG00000253887 | ENSG00000253887 | 8  | 9255349   | 9260295   | lincRNA              | 5,80 | 0,5865398 |
| ENSG00000226965 | ENSG00000226965 | 7  | 110432239 | 110534754 | lincRNA              | 5,80 | 0,1217903 |
| ENSG00000237870 | ENSG00000237870 | 7  | 116275606 | 116286734 | processed_transcript | 5,80 | 0,4036702 |
| ENSG00000232234 | ENSG00000232234 | 6  | 8329655   | 8342455   | lincRNA              | 5,80 | 2,95E-02  |
| ENSG00000249128 | ENSG00000249128 | 5  | 118596188 | 118628092 | lincRNA              | 5,80 | 1,3038915 |

|                 |                 |    |           |           |                         |      |           |
|-----------------|-----------------|----|-----------|-----------|-------------------------|------|-----------|
| ENSG00000234371 | RPSAP31         | 3  | 183884924 | 183888449 | transcribed_processed   | 5,80 | 6,23E-03  |
| ENSG00000232688 | ENSG00000232688 | 2  | 66921510  | 66922457  | lincRNA                 | 5,80 | 0,4036702 |
| ENSG00000271550 | BNIP3P11        | 7  | 64678954  | 64687393  | processed_pseudogene    | 5,78 | 0,7367804 |
| ENSG00000223694 | ADH5P3          | 1  | 240170155 | 240171291 | processed_pseudogene    | 5,75 | 0,512233  |
| ENSG00000232677 | LINC00665       | 19 | 36313067  | 36331718  | lincRNA                 | 5,74 | 0         |
| ENSG00000249849 | ENSG00000249849 | 5  | 177682294 | 177713969 | antisense               | 5,73 | 0,3565078 |
| ENSG00000248544 | ENSG00000248544 | 5  | 157375741 | 157384950 | antisense               | 5,72 | 0,5682268 |
| ENSG00000264672 | SEPT4-AS1       | 17 | 58519837  | 58556977  | antisense               | 5,71 | 0,7367804 |
| ENSG00000223646 | ENSG00000223646 | 7  | 112622378 | 112708080 | lincRNA                 | 5,70 | 0,5865398 |
| ENSG00000280776 | LINC01202       | 5  | 161910252 | 162001196 | lincRNA                 | 5,70 | 0,4036702 |
| ENSG00000231532 | LINC01249       | 2  | 4628222   | 4656215   | lincRNA                 | 5,70 | 0,8926569 |
| ENSG00000244310 | ENSG00000244310 | 2  | 9115197   | 9116884   | lincRNA                 | 5,70 | 0,8926569 |
| ENSG00000232514 | ENSG00000232514 | 1  | 48497263  | 48497736  | processed_pseudogene    | 5,70 | 0,4036702 |
| ENSG00000279414 | ENSG00000279414 | 21 | 9026821   | 9027329   | processed_pseudogene    | 5,66 | 0,2746192 |
| ENSG00000245522 | ENSG00000245522 | 11 | 9754770   | 9759533   | lincRNA                 | 5,63 | 0,6309753 |
| ENSG00000266801 | ENSG00000266801 | 16 | 68933820  | 68937725  | sense_intronic          | 5,62 | 0,4036702 |
| ENSG00000176054 | RPL23P2         | 21 | 28997613  | 28998033  | processed_pseudogene    | 5,60 | 1,5215308 |
| ENSG00000258496 | ENSG00000258496 | 14 | 87251103  | 87251679  | lincRNA                 | 5,60 | 0,5865398 |
| ENSG00000250049 | ENSG00000250049 | 5  | 92082597  | 92479426  | lincRNA                 | 5,60 | 0,5865398 |
| ENSG00000251613 | ENSG00000251613 | 5  | 72687112  | 72762727  | lincRNA                 | 5,60 | 0,4036702 |
| ENSG00000248210 | ENSG00000248210 | 4  | 149154295 | 149278123 | lincRNA                 | 5,60 | 1,3038915 |
| ENSG00000243491 | ENSG00000243491 | 2  | 9757496   | 9770341   | lincRNA                 | 5,60 | 0,8926569 |
| ENSG00000236643 | ENSG00000236643 | 9  | 124770123 | 124772927 | antisense               | 5,58 | 0,2161218 |
| ENSG00000229436 | ENSG00000229436 | 7  | 80662331  | 80662585  | processed_pseudogene    | 5,58 | 0,512233  |
| ENSG00000229928 | LINC00400       | 13 | 43158631  | 43159466  | lincRNA                 | 5,57 | 0,5865398 |
| ENSG00000214975 | PPIAP29         | 6  | 24976419  | 24976982  | processed_pseudogene    | 5,56 | 0,7095968 |
| ENSG00000258416 | ENSG00000258416 | 14 | 79893080  | 79974169  | lincRNA                 | 5,55 | 1,6739638 |
| ENSG00000273989 | ENSG00000273989 | 12 | 28236227  | 28236828  | sense_intronic          | 5,55 | 0,2746192 |
| ENSG00000250551 | ENSG00000250551 | 5  | 96050115  | 96215519  | lincRNA                 | 5,54 | 2,95E-02  |
| ENSG00000249898 | MCPH1-AS1       | 8  | 6618475   | 6708209   | antisense               | 5,53 | 2,21E-02  |
| ENSG00000273987 | ENSG00000273987 | 12 | 75333798  | 75334486  | sense_intronic          | 5,52 | 0,3318209 |
| ENSG00000214198 | TTC41P          | 12 | 103843749 | 103930211 | unitary_pseudogene      | 5,52 | 2,95E-02  |
| ENSG00000261327 | ENSG00000261327 | 16 | 88177298  | 88178941  | lincRNA                 | 5,50 | 0,5865398 |
| ENSG00000258927 | ENSG00000258927 | 14 | 95620914  | 95643285  | lincRNA                 | 5,50 | 0,8926569 |
| ENSG00000255523 | ENSG00000255523 | 11 | 58917015  | 58928689  | antisense               | 5,50 | 0,4036702 |
| ENSG00000204832 | ST8SIA6-AS1     | 10 | 17386936  | 17413503  | antisense               | 5,50 | 0         |
| ENSG00000280366 | ENSG00000280366 | 9  | 79975023  | 79990064  | lincRNA                 | 5,50 | 0,1217903 |
| ENSG00000250407 | ENSG00000250407 | 5  | 146563226 | 146617004 | antisense               | 5,50 | 0,1217903 |
| ENSG00000251321 | PCAT4           | 4  | 79827471  | 79877770  | lincRNA                 | 5,50 | 0,4036702 |
| ENSG00000231482 | ENSG00000231482 | 2  | 1572554   | 1580311   | lincRNA                 | 5,50 | 0,512233  |
| ENSG00000236605 | ENSG00000236605 | 2  | 67324627  | 67325304  | lincRNA                 | 5,50 | 0         |
| ENSG00000253269 | ENSG00000253269 | 5  | 169772966 | 169779365 | antisense               | 5,45 | 1,6739638 |
| ENSG00000232517 | ENSG00000232517 | 5  | 54808210  | 54872551  | unitary_pseudogene      | 5,43 | 1,0789438 |
| ENSG00000232093 | ENSG00000232093 | 1  | 155045191 | 155046118 | antisense               | 5,42 | 0,6526668 |
| ENSG00000259904 | ACTG1P15        | 15 | 34373541  | 34374603  | processed_pseudogene    | 5,40 | 0,512233  |
| ENSG00000258444 | ENSG00000258444 | 14 | 23415339  | 23415686  | antisense               | 5,40 | 0,8926569 |
| ENSG00000255079 | ENSG00000255079 | 11 | 44694863  | 44696301  | lincRNA                 | 5,40 | 0,8926569 |
| ENSG00000227531 | ENSG00000227531 | 9  | 111139246 | 111284836 | lincRNA                 | 5,40 | 0,5865398 |
| ENSG00000253567 | ENSG00000253567 | 8  | 28447264  | 28455902  | antisense               | 5,40 | 0,4036702 |
| ENSG00000225416 | ENSG00000225416 | 7  | 152602213 | 152602892 | processed_pseudogene    | 5,40 | 1,3038915 |
| ENSG00000248373 | ENSG00000248373 | 4  | 104907357 | 105120000 | lincRNA                 | 5,40 | 0,8926569 |
| ENSG00000232455 | LARS2-AS1       | 3  | 45483974  | 45509545  | antisense               | 5,40 | 0,1217903 |
| ENSG00000234796 | ENSG00000234796 | 2  | 910926    | 921124    | antisense               | 5,40 | 1,3038915 |
| ENSG00000229119 | ENSG00000229119 | 5  | 166382305 | 166382599 | processed_pseudogene    | 5,39 | 0,2746192 |
| ENSG00000234840 | LINC01239       | 9  | 22646200  | 22824213  | lincRNA                 | 5,33 | 4,86E-02  |
| ENSG00000225405 | RPS15AP17       | 4  | 62105660  | 62106049  | processed_pseudogene    | 5,33 | 0,4909563 |
| ENSG00000227694 | RPL23AP74       | 17 | 61069871  | 61070341  | processed_pseudogene    | 5,33 | 0,5865398 |
| ENSG00000258628 | ENSG00000258628 | 15 | 20228620  | 20277503  | unprocessed_pseudogene  | 5,31 | 0,5682268 |
| ENSG00000229715 | EEF1DP3         | 13 | 31846841  | 31953472  | transcribed_unprocessed | 5,31 | 0,9880903 |

|                 |                 |    |           |           |                       |      |           |
|-----------------|-----------------|----|-----------|-----------|-----------------------|------|-----------|
| ENSG00000262402 | ENSG00000262402 | 17 | 2127430   | 2127904   | processed_pseudogen   | 5,31 | 0,8468482 |
| ENSG00000259627 | ENSG00000259627 | 15 | 63070025  | 63071911  | antisense             | 5,30 | 0,7582127 |
| ENSG00000259447 | ENSG00000259447 | 15 | 39300418  | 39310782  | lincRNA               | 5,30 | 1,3038915 |
| ENSG00000248478 | ENSG00000248478 | 8  | 121679126 | 121707631 | lincRNA               | 5,30 | 0,1217903 |
| ENSG00000228400 | ENSG00000228400 | 2  | 124016858 | 124025173 | antisense             | 5,30 | 0,4036702 |
| ENSG00000260509 | ENSG00000260509 | 13 | 25300124  | 25301438  | lincRNA               | 5,28 | 1,0510989 |
| ENSG00000275322 | ENSG00000275322 | 15 | 96342953  | 96345651  | lincRNA               | 5,26 | 0,4909563 |
| ENSG00000237404 | ENSG00000237404 | 6  | 19689825  | 19753113  | lincRNA               | 5,26 | 2,95E-02  |
| ENSG00000253978 | ENSG00000253978 | 5  | 168229583 | 168232357 | antisense             | 5,25 | 0,2746192 |
| ENSG00000274317 | ENSG00000274317 | 13 | 37934565  | 38048169  | lincRNA               | 5,24 | 0,8468482 |
| ENSG00000263470 | ENSG00000263470 | 17 | 65100812  | 65111058  | lincRNA               | 5,23 | 9,18E-02  |
| ENSG00000256843 | ENSG00000256843 | 12 | 31748100  | 31748240  | processed_pseudogen   | 5,22 | 0,2161218 |
| ENSG00000260785 | CASC17          | 17 | 71097775  | 71202177  | lincRNA               | 5,20 | 0,1217903 |
| ENSG00000259459 | ENSG00000259459 | 15 | 63390136  | 63438320  | lincRNA               | 5,20 | 0,1217903 |
| ENSG00000237937 | ENSG00000237937 | 11 | 116639422 | 116658252 | lincRNA               | 5,20 | 0,8926569 |
| ENSG00000251381 | LINC00958       | 11 | 12961842  | 12989548  | lincRNA               | 5,20 | 0,5865398 |
| ENSG00000236712 | ENSG00000236712 | 7  | 7293508   | 7293880   | processed_pseudogen   | 5,20 | 0,4036702 |
| ENSG00000272701 | MESTIT1         | 7  | 130486042 | 130491033 | antisense             | 5,20 | 0,7582127 |
| ENSG00000254365 | ENSG00000254365 | 5  | 167287320 | 167294273 | antisense             | 5,20 | 0,4036702 |
| ENSG00000272218 | ENSG00000272218 | 4  | 186892552 | 186892983 | lincRNA               | 5,20 | 0,4036702 |
| ENSG00000231915 | SALL4P5         | 3  | 22989823  | 22991582  | unprocessed_pseudogen | 5,20 | 0,4036702 |
| ENSG00000227061 | ENSG00000227061 | 2  | 197569    | 202605    | antisense             | 5,20 | 0,5865398 |
| ENSG00000233045 | ENSG00000233045 | 2  | 138278574 | 138279210 | processed_pseudogen   | 5,20 | 4,86E-02  |
| ENSG00000234810 | ENSG00000234810 | 1  | 55581037  | 55868248  | lincRNA               | 5,20 | 0,7367804 |
| ENSG00000164616 | FBXL21          | 5  | 135930317 | 135951591 | transcribed_unitary_p | 5,19 | 4,86E-02  |
| ENSG00000264956 | ENSG00000264956 | 17 | 22266425  | 22288133  | lincRNA               | 5,18 | 1,1964007 |
| ENSG00000226747 | ENSG00000226747 | 2  | 185719874 | 185740479 | antisense             | 5,18 | 0,2746192 |
| ENSG00000261286 | ENSG00000261286 | 16 | 84459259  | 84467361  | antisense             | 5,17 | 2,21E-02  |
| ENSG00000271283 | ENSG00000271283 | 19 | 19699203  | 19699409  | processed_pseudogen   | 5,17 | 0,5682268 |
| ENSG00000231409 | ENSG00000231409 | 15 | 34943080  | 34943394  | processed_pseudogen   | 5,17 | 1,1217155 |
| ENSG00000260093 | ENSG00000260093 | 8  | 10050485  | 10054254  | antisense             | 5,17 | 1,3038915 |
| ENSG00000231908 | IDH1-AS1        | 2  | 208255247 | 208256181 | antisense             | 5,17 | 0,3565078 |
| ENSG00000231638 | ENSG00000231638 | 7  | 43508728  | 43522542  | antisense             | 5,16 | 0,4909563 |
| ENSG00000273254 | ENSG00000273254 | 21 | 29024255  | 29024890  | antisense             | 5,11 | 1,8851183 |
| ENSG00000274605 | ENSG00000274605 | 13 | 100086031 | 100088848 | lincRNA               | 5,11 | 0,4036702 |
| ENSG00000269043 | ENSG00000269043 | 19 | 20432552  | 20528615  | lincRNA               | 5,10 | 0,5865398 |
| ENSG00000267579 | ENSG00000267579 | 18 | 58557070  | 58566677  | antisense             | 5,10 | 0,5865398 |
| ENSG00000261122 | ENSG00000261122 | 16 | 35743268  | 35756515  | lincRNA               | 5,10 | 0,8926569 |
| ENSG00000242775 | ENSG00000242775 | 3  | 55360443  | 55361829  | lincRNA               | 5,10 | 0,8926569 |
| ENSG00000238042 | ENSG00000238042 | 1  | 221880981 | 221978523 | lincRNA               | 5,10 | 0,5865398 |
| ENSG00000159904 | ZNF890P         | 7  | 5121239   | 5144546   | transcribed_unproces  | 5,09 | 0,512233  |
| ENSG00000245248 | USP2-AS1        | 11 | 119381778 | 119526664 | antisense             | 5,09 | 4,86E-02  |
| ENSG00000258153 | HSPE1P4         | 12 | 101873316 | 101873623 | processed_pseudogen   | 5,09 | 0,5682268 |
| ENSG00000258088 | ENSG00000258088 | 12 | 75694010  | 75698816  | lincRNA               | 5,07 | 0,1217903 |
| ENSG00000272155 | ENSG00000272155 | 8  | 65714334  | 65714778  | antisense             | 5,04 | 1,547231  |
| ENSG00000254420 | ENSG00000254420 | 11 | 78324758  | 78444049  | antisense             | 5,03 | 3,27E-03  |
| ENSG00000234577 | SYNE1-AS1       | 6  | 152380546 | 152381564 | antisense             | 5,02 | 1,0177863 |
| ENSG00000260958 | ENSG00000260958 | 16 | 35207937  | 35284146  | lincRNA               | 5,00 | 0,8926569 |
| ENSG00000259342 | ENSG00000259342 | 15 | 45430652  | 45441808  | antisense             | 5,00 | 0,4036702 |
| ENSG00000253633 | ENSG00000253633 | 8  | 102528740 | 102538668 | lincRNA               | 5,00 | 0,4036702 |
| ENSG00000235538 | ENSG00000235538 | 6  | 163703904 | 163759841 | lincRNA               | 5,00 | 0,1217903 |
| ENSG00000214108 | TPT1P5          | 5  | 31908361  | 31909186  | processed_pseudogen   | 5,00 | 0,4332376 |
| ENSG00000213519 | ENSG00000213519 | 3  | 197580344 | 197580629 | processed_pseudogen   | 5,00 | 0,3318209 |
| ENSG00000230773 | ENSG00000230773 | 2  | 47941696  | 48240983  | lincRNA               | 5,00 | 1,6739638 |
| ENSG00000224445 | ENSG00000224445 | 1  | 99472332  | 99600995  | lincRNA               | 5,00 | 0,8926569 |
| ENSG00000229007 | EXOSC3P1        | 21 | 32496812  | 32497311  | processed_pseudogen   | 5,00 | 0,1217903 |
| ENSG00000253480 | ENSG00000253480 | 5  | 180085717 | 180087038 | processed_pseudogen   | 4,96 | 9,18E-02  |
| ENSG00000271329 | ENSG00000271329 | 1  | 44187943  | 44189049  | processed_pseudogen   | 4,94 | 1,3038915 |
| ENSG00000269086 | ENSG00000269086 | 19 | 34837889  | 34855304  | lincRNA               | 4,90 | 0,1217903 |

|                 |                 |    |           |           |                      |      |           |
|-----------------|-----------------|----|-----------|-----------|----------------------|------|-----------|
| ENSG00000260834 | ENSG00000260834 | 16 | 65190973  | 65234914  | lincRNA              | 4,90 | 0,1217903 |
| ENSG00000257109 | OR4F28P         | 15 | 101875964 | 101876901 | unprocessed_pseudog  | 4,90 | 0,1217903 |
| ENSG00000228115 | ENSG00000228115 | 9  | 487774    | 495610    | sense_intronic       | 4,90 | 0,8926569 |
| ENSG00000272243 | ENSG00000272243 | 6  | 74530248  | 74734279  | lincRNA              | 4,90 | 0,5865398 |
| ENSG00000230126 | FGF12-AS2       | 3  | 192515022 | 192516573 | antisense            | 4,90 | 0,4036702 |
| ENSG00000263884 | ENSG00000263884 | 18 | 268148    | 270278    | lincRNA              | 4,86 | 1,0789438 |
| ENSG00000255847 | ENSG00000255847 | 11 | 73963657  | 73970287  | antisense            | 4,84 | 0,1392851 |
| ENSG00000278931 | ENSG00000278931 | 21 | 8857260   | 8880976   | unprocessed_pseudog  | 4,84 | 0,4036702 |
| ENSG00000257698 | ENSG00000257698 | 12 | 57931528  | 57936175  | lincRNA              | 4,83 | 2,21E-02  |
| ENSG00000227107 | ENSG00000227107 | 2  | 237612977 | 237626525 | lincRNA              | 4,83 | 0,8468482 |
| ENSG00000224361 | ENSG00000224361 | 2  | 23507043  | 23524344  | antisense            | 4,82 | 0,7582127 |
| ENSG00000229989 | MIR181A1HG      | 1  | 198807493 | 198937429 | lincRNA              | 4,82 | 0,2161218 |
| ENSG00000253392 | ENSG00000253392 | 19 | 2915146   | 2926807   | antisense            | 4,81 | 0,1392851 |
| ENSG00000241357 | ENSG00000241357 | 7  | 100435257 | 100436510 | antisense            | 4,80 | 3,27E-03  |
| ENSG00000239674 | ENSG00000239674 | 22 | 32141267  | 32143272  | lincRNA              | 4,80 | 0,1217903 |
| ENSG00000279851 | ENSG00000279851 | 21 | 10122273  | 10129029  | lincRNA              | 4,80 | 0,5865398 |
| ENSG00000176840 | MIR7-3HG        | 19 | 4769140   | 4772533   | lincRNA              | 4,80 | 0,5865398 |
| ENSG00000267466 | ENSG00000267466 | 17 | 77563368  | 77568695  | lincRNA              | 4,80 | 0,8926569 |
| ENSG00000227624 | SNRPEP3         | 16 | 20238972  | 20239247  | processed_pseudoger  | 4,80 | 1,3038915 |
| ENSG00000214344 | OR4F13P         | 15 | 101842119 | 101850324 | transcribed_unproces | 4,80 | 0,5865398 |
| ENSG00000241582 | RPL23AP8        | 14 | 34694170  | 34694644  | processed_pseudoger  | 4,80 | 0,4036702 |
| ENSG00000232849 | LINC00363       | 13 | 93056657  | 93057926  | lincRNA              | 4,80 | 1,3038915 |
| ENSG00000256209 | ENSG00000256209 | 12 | 131469311 | 131492951 | lincRNA              | 4,80 | 1,8851183 |
| ENSG00000234506 | LINC01506       | 9  | 68543541  | 68546589  | lincRNA              | 4,80 | 0,8926569 |
| ENSG00000269957 | ENSG00000269957 | 9  | 24545952  | 24591993  | lincRNA              | 4,80 | 0,4036702 |
| ENSG00000229140 | CCDC26          | 8  | 129351691 | 129680239 | lincRNA              | 4,80 | 1,3038915 |
| ENSG00000255364 | ENSG00000255364 | 8  | 122414332 | 122428551 | lincRNA              | 4,80 | 0,4036702 |
| ENSG00000224865 | ENSG00000224865 | 7  | 131897641 | 131948953 | lincRNA              | 4,80 | 0,8926569 |
| ENSG00000239614 | HMG1P7          | 3  | 93988634  | 93988946  | processed_pseudoger  | 4,80 | 0,1217903 |
| ENSG00000213981 | ENSG00000213981 | 2  | 170640374 | 170695374 | antisense            | 4,80 | 0,5865398 |
| ENSG00000271286 | ENSG00000271286 | X  | 21939461  | 21940160  | processed_pseudoger  | 4,80 | 0,5865398 |
| ENSG00000213070 | HMGB3P6         | 1  | 164356767 | 164357364 | processed_pseudoger  | 4,78 | 0,7095968 |
| ENSG00000249492 | ENSG00000249492 | 5  | 43483959  | 43509356  | processed_transcript | 4,75 | 0,6526668 |
| ENSG00000232682 | ENSG00000232682 | 10 | 60050668  | 60060743  | antisense            | 4,71 | 1,0789438 |
| ENSG00000267070 | ENSG00000267070 | 16 | 5098739   | 5142595   | lincRNA              | 4,70 | 0,4036702 |
| ENSG00000271395 | ENSG00000271395 | 13 | 89551233  | 89552389  | lincRNA              | 4,70 | 1,3038915 |
| ENSG00000273819 | ENPP7P7         | 11 | 67812557  | 67873367  | unprocessed_pseudog  | 4,70 | 1,8851183 |
| ENSG00000235743 | ENSG00000235743 | 6  | 23337711  | 23346560  | lincRNA              | 4,70 | 0,8926569 |
| ENSG00000273118 | ENSG00000273118 | 2  | 212581357 | 213021545 | sense_overlapping    | 4,70 | 1,3038915 |
| ENSG00000273800 | ENSG00000273800 | X  | 12583415  | 12583526  | unprocessed_pseudog  | 4,70 | 2,95E-02  |
| ENSG00000270402 | ENSG00000270402 | 19 | 19708965  | 19710465  | processed_pseudoger  | 4,69 | 1,2188867 |
| ENSG00000278390 | ENSG00000278390 | 13 | 41132939  | 41236686  | antisense            | 4,68 | 1,2188867 |
| ENSG00000228794 | LINC01128       | 1  | 825138    | 859446    | processed_transcript | 4,66 | 0         |
| ENSG00000267123 | ENSG00000267123 | 17 | 78617389  | 78632057  | lincRNA              | 4,64 | 0,7582127 |
| ENSG00000229191 | ENSG00000229191 | 1  | 201023949 | 201028792 | antisense            | 4,64 | 1,2188867 |
| ENSG00000279062 | ENSG00000279062 | 21 | 10136419  | 10137004  | unprocessed_pseudog  | 4,60 | 0,8926569 |
| ENSG00000278531 | ENSG00000278531 | 10 | 45187292  | 45198323  | unprocessed_pseudog  | 4,60 | 0,4036702 |
| ENSG00000254181 | SLC25A51P3      | 8  | 80594815  | 80595703  | processed_pseudoger  | 4,60 | 0,5865398 |
| ENSG00000228700 | ENSG00000228700 | 7  | 128433422 | 128433713 | processed_pseudoger  | 4,60 | 1,8851183 |
| ENSG00000232756 | ENSG00000232756 | 7  | 77990384  | 77995171  | antisense            | 4,60 | 0,4036702 |
| ENSG00000233108 | ENSG00000233108 | 7  | 7958183   | 7969903   | antisense            | 4,60 | 0,5682268 |
| ENSG00000248551 | ENSG00000248551 | 4  | 175346358 | 175403110 | lincRNA              | 4,60 | 2,95E-02  |
| ENSG00000223783 | ENSG00000223783 | 3  | 195836193 | 195860404 | lincRNA              | 4,60 | 0,8926569 |
| ENSG00000228308 | LINC01209       | 3  | 176814155 | 176817001 | lincRNA              | 4,60 | 1,3038915 |
| ENSG00000237750 | ENSG00000237750 | 2  | 162768936 | 162797972 | antisense            | 4,60 | 0,5865398 |
| ENSG00000259153 | ENSG00000259153 | 14 | 70810205  | 70815403  | lincRNA              | 4,58 | 2,0846889 |
| ENSG00000229044 | ENSG00000229044 | 1  | 31333067  | 31346799  | antisense            | 4,58 | 0,8468482 |
| ENSG00000268894 | PLCE1-AS1       | 10 | 94279277  | 94287478  | antisense            | 4,57 | 2,007219  |
| ENSG00000254777 | ENSG00000254777 | 8  | 60910053  | 60966557  | lincRNA              | 4,56 | 0,4909563 |

|                 |                 |    |           |           |                      |      |           |
|-----------------|-----------------|----|-----------|-----------|----------------------|------|-----------|
| ENSG00000196204 | RNF216P1        | 7  | 4973988   | 5040675   | transcribed_unproces | 4,55 | 0         |
| ENSG00000240280 | TCAM1P          | 17 | 63849292  | 63864379  | unitary_pseudogene   | 4,55 | 0,4036702 |
| ENSG00000277301 | ENSG00000277301 | 20 | 32509959  | 32520285  | antisense            | 4,54 | 0,8108966 |
| ENSG00000233457 | ENSG00000233457 | 9  | 78150532  | 78151193  | processed_pseudoger  | 4,54 | 1,4697798 |
| ENSG00000178458 | H3F3AP6         | 4  | 139698144 | 139698554 | processed_pseudoger  | 4,53 | 0,3565078 |
| ENSG00000268050 | ENSG00000268050 | 9  | 129175807 | 129177575 | antisense            | 4,53 | 0,7582127 |
| ENSG00000235776 | ENSG00000235776 | 22 | 19792294  | 19793094  | processed_pseudoger  | 4,50 | 0         |
| ENSG00000230352 | ENSG00000230352 | 20 | 59360927  | 59364773  | lincRNA              | 4,50 | 0,1217903 |
| ENSG00000235621 | LINC00494       | 20 | 48359950  | 48370629  | lincRNA              | 4,50 | 0,4036702 |
| ENSG00000260162 | ENSG00000260162 | 16 | 88177289  | 88178646  | lincRNA              | 4,50 | 1,1964007 |
| ENSG00000259636 | ENSG00000259636 | 15 | 86932880  | 86946331  | sense_intronic       | 4,50 | 0,5865398 |
| ENSG00000254140 | ENSG00000254140 | 14 | 105601472 | 105605357 | lincRNA              | 4,50 | 0,4036702 |
| ENSG00000233379 | ENSG00000233379 | 13 | 77939162  | 77944874  | lincRNA              | 4,50 | 0,8926569 |
| ENSG00000275598 | ENSG00000275598 | 11 | 63469376  | 63470944  | processed_pseudoger  | 4,50 | 0,8926569 |
| ENSG00000228280 | ENSG00000228280 | 10 | 75742740  | 75743755  | sense_intronic       | 4,50 | 0,4036702 |
| ENSG00000236748 | ENSG00000236748 | 7  | 8938787   | 8939369   | processed_pseudoger  | 4,50 | 0,5865398 |
| ENSG00000250461 | ENSG00000250461 | 5  | 61375112  | 61375855  | processed_pseudoger  | 4,50 | 1,6174211 |
| ENSG00000239265 | CLRN1-AS1       | 3  | 150852484 | 151080726 | antisense            | 4,50 | 0,7367804 |
| ENSG00000222030 | ENSG00000222030 | 2  | 59217708  | 59279400  | lincRNA              | 4,50 | 2,95E-02  |
| ENSG00000236720 | ENSG00000236720 | 1  | 177700524 | 177710330 | lincRNA              | 4,50 | 0,1217903 |
| ENSG00000180385 | EMC3-AS1        | 3  | 9986893   | 10006990  | transcribed_unproces | 4,49 | 2,21E-02  |
| ENSG00000248636 | ENSG00000248636 | 12 | 119387987 | 119668079 | lincRNA              | 4,48 | 0,512233  |
| ENSG00000232134 | RPS15AP12       | 1  | 220143964 | 220144351 | processed_pseudoger  | 4,48 | 0,8108966 |
| ENSG00000223803 | RPS20P14        | 3  | 186900198 | 186900557 | processed_pseudoger  | 4,47 | 0,4332376 |
| ENSG00000227028 | SLC8A1-AS1      | 2  | 39786453  | 40255209  | antisense            | 4,45 | 4,86E-02  |
| ENSG00000279047 | ENSG00000279047 | 5  | 141046260 | 141096402 | antisense            | 4,44 | 0,5682268 |
| ENSG00000206567 | ENSG00000206567 | 3  | 10006418  | 10011209  | lincRNA              | 4,43 | 3,27E-03  |
| ENSG00000226047 | ENSG00000226047 | 9  | 107117459 | 107121705 | lincRNA              | 4,42 | 0,8468482 |
| ENSG00000262943 | ALOX12P2        | 17 | 6853861   | 6954107   | transcribed_unproces | 4,42 | 1,40E-02  |
| ENSG00000251211 | ENSG00000251211 | 5  | 178165702 | 178166562 | processed_pseudoger  | 4,41 | 1,2188867 |
| ENSG00000257883 | ENSG00000257883 | 12 | 116661582 | 116698065 | lincRNA              | 4,40 | 0,1217903 |
| ENSG00000256195 | ENSG00000256195 | 11 | 114360635 | 114380045 | antisense            | 4,40 | 1,3038915 |
| ENSG00000226140 | ENSG00000226140 | 10 | 16278701  | 16295858  | lincRNA              | 4,40 | 0,4036702 |
| ENSG00000253470 | ENSG00000253470 | 8  | 125749055 | 125750241 | lincRNA              | 4,40 | 0,8926569 |
| ENSG00000253659 | ENSG00000253659 | 8  | 79297717  | 79314471  | lincRNA              | 4,40 | 1,3038915 |
| ENSG00000231539 | ENSG00000231539 | 7  | 42829672  | 42844438  | lincRNA              | 4,40 | 2,95E-02  |
| ENSG00000249462 | MLLT10P2        | 4  | 189973599 | 189973847 | processed_pseudoger  | 4,40 | 0,8926569 |
| ENSG00000228952 | ENSG00000228952 | 3  | 187448845 | 187449450 | lincRNA              | 4,40 | 0,4036702 |
| ENSG00000227824 | ENSG00000227824 | 2  | 215869923 | 215870518 | lincRNA              | 4,40 | 0,8926569 |
| ENSG00000269974 | ENSG00000269974 | 15 | 30648797  | 30649529  | lincRNA              | 4,39 | 1,2188867 |
| ENSG00000261377 | PDCD6IPP2       | 15 | 28789664  | 28859007  | transcribed_unproces | 4,37 | 0,512233  |
| ENSG00000255450 | ENSG00000255450 | 11 | 29275655  | 29276565  | processed_pseudoger  | 4,36 | 0,7367804 |
| ENSG00000267194 | ENSG00000267194 | 17 | 69551358  | 69553861  | lincRNA              | 4,35 | 0,2746192 |
| ENSG00000267356 | ENSG00000267356 | 18 | 14104542  | 14105226  | antisense            | 4,35 | 0,4850164 |
| ENSG00000226435 | ANKRD18DP       | 3  | 198053522 | 198080720 | transcribed_unproces | 4,33 | 1,3038915 |
| ENSG00000259083 | ENSG00000259083 | 14 | 39174885  | 39175880  | antisense            | 4,32 | 1,1217155 |
| ENSG00000253741 | ENSG00000253741 | 8  | 142702252 | 142726973 | antisense            | 4,32 | 0,4332376 |
| ENSG00000231295 | ENSG00000231295 | 7  | 120746738 | 120752514 | antisense            | 4,31 | 0,6898868 |
| ENSG00000239780 | RPLP0P11        | 18 | 50457887  | 50458795  | processed_pseudoger  | 4,30 | 0,8926569 |
| ENSG00000262670 | ENSG00000262670 | 17 | 3278775   | 3386339   | sense_overlapping    | 4,30 | 0,5865398 |
| ENSG00000250514 | ENSG00000250514 | 16 | 76634998  | 76658478  | lincRNA              | 4,30 | 0,4036702 |
| ENSG00000259441 | MRPL15P1        | 15 | 89752296  | 89753493  | processed_pseudoger  | 4,30 | 0,4036702 |
| ENSG00000231829 | ENSG00000231829 | 10 | 95141925  | 95168425  | lincRNA              | 4,30 | 0,4036702 |
| ENSG00000243531 | ENSG00000243531 | 7  | 6900424   | 6900623   | processed_pseudoger  | 4,30 | 1,3038915 |
| ENSG00000248994 | ENSG00000248994 | 5  | 1933863   | 1959176   | lincRNA              | 4,30 | 0,4036702 |
| ENSG00000229221 | HNRNPA1P66      | 2  | 63751697  | 63752630  | processed_pseudoger  | 4,30 | 0,1217903 |
| ENSG00000231290 | APCDD1L-AS1     | 20 | 58515379  | 58619888  | processed_transcript | 4,30 | 0,6526668 |
| ENSG00000247240 | UBL7-AS1        | 15 | 74461265  | 74481302  | antisense            | 4,29 | 1,0177863 |
| ENSG00000267226 | ENSG00000267226 | 18 | 58670009  | 58671877  | antisense            | 4,28 | 0,4909563 |



|                 |                 |   |    |           |           |                       |      |           |
|-----------------|-----------------|---|----|-----------|-----------|-----------------------|------|-----------|
| ENSG00000179818 | PCBP1-AS1       |   | 2  | 69962263  | 70103220  | processed_transcript  | 4,28 | 0         |
| ENSG00000227359 | ENSG00000227359 |   | 2  | 113677702 | 113704078 | lincRNA               | 4,28 | 0,512233  |
| ENSG00000228397 | ENSG00000228397 |   | 1  | 22023990  | 22026048  | lincRNA               | 4,27 | 1,1217155 |
| ENSG00000258759 | ENSG00000258759 |   | 14 | 67799004  | 67799609  | processed_pseudogen   | 4,27 | 0,3565078 |
| ENSG00000242083 | RPL7AP31        |   | 4  | 56356135  | 56356932  | processed_pseudogen   | 4,26 | 2,21E-02  |
| ENSG00000225265 | TAF1A-AS1       |   | 1  | 222589825 | 222593032 | antisense             | 4,26 | 0,4850164 |
| ENSG00000181800 | CELF2-AS1       |   | 10 | 11316834  | 11319884  | antisense             | 4,25 | 0,4036702 |
| ENSG00000198155 | ZNF876P         |   | 4  | 212610    | 255985    | transcribed_unproces  | 4,24 | 0,1187106 |
| ENSG00000243083 | LINC00870       |   | 3  | 72151257  | 72174332  | lincRNA               | 4,21 | 1,6498059 |
| ENSG00000227540 | ENSG00000227540 |   | 10 | 73252791  | 73254349  | antisense             | 4,21 | 0,6898868 |
| ENSG00000277112 | ENSG00000277112 |   | 20 | 30681825  | 30723932  | transcribed_unproces  | 4,20 | 0,4036702 |
| ENSG00000261815 | ENSG00000261815 |   | 16 | 49170552  | 49171786  | lincRNA               | 4,20 | 0,1217903 |
| ENSG00000259611 | LINC01582       |   | 15 | 98085627  | 98103712  | lincRNA               | 4,20 | 0,8926569 |
| ENSG00000259675 | ENSG00000259675 |   | 15 | 61639349  | 61715171  | lincRNA               | 4,20 | 0,4036702 |
| ENSG00000236339 | POM121L13P      |   | 13 | 28778558  | 28778937  | processed_pseudogen   | 4,20 | 0,8926569 |
| ENSG00000254906 | ENSG00000254906 |   | 11 | 20670425  | 20671297  | antisense             | 4,20 | 0,4036702 |
| ENSG00000253944 | ENSG00000253944 |   | 8  | 17801345  | 17861069  | antisense             | 4,20 | 0,4036702 |
| ENSG00000254222 | ENSG00000254222 |   | 8  | 61264624  | 61292039  | antisense             | 4,20 | 0,5865398 |
| ENSG00000225365 | ENSG00000225365 |   | 7  | 158537495 | 158539879 | antisense             | 4,20 | 0,1217903 |
| ENSG00000196634 | LUADT1          |   | 6  | 147158925 | 147180992 | lincRNA               | 4,20 | 1,3038915 |
| ENSG00000224039 | ENSG00000224039 |   | 3  | 16692745  | 16694202  | unprocessed_pseudog   | 4,20 | 1,3038915 |
| ENSG00000241359 | SYNPR-AS1       |   | 3  | 63423596  | 63550051  | antisense             | 4,20 | 0,8926569 |
| ENSG00000230183 | CNOT6LP1        |   | 15 | 56005715  | 56007176  | processed_pseudogen   | 4,19 | 0,8926569 |
| ENSG00000254693 | ENSG00000254693 |   | 11 | 44604508  | 44605337  | antisense             | 4,19 | 2,0846889 |
| ENSG00000261054 | ENSG00000261054 |   | 15 | 99128832  | 99131806  | antisense             | 4,19 | 0,8926569 |
| ENSG00000267243 | ENSG00000267243 |   | 19 | 28435388  | 28727777  | lincRNA               | 4,18 | 0,7367804 |
| ENSG00000267507 | ENSG00000267507 |   | 19 | 55119250  | 55120383  | processed_pseudogen   | 4,18 | 0,512233  |
| ENSG00000275234 | ENSG00000275234 |   | 19 | 6469465   | 6470152   | antisense             | 4,18 | 0,6309753 |
| ENSG00000231294 | ENSG00000231294 |   | 2  | 210171518 | 210230383 | antisense             | 4,18 | 0,512233  |
| ENSG00000231066 | NPM1P9          | X |    | 14834476  | 14835319  | processed_pseudogen   | 4,18 | 2,0846889 |
| ENSG00000248278 | SUMO2P17        |   | 17 | 48874860  | 48908983  | transcribed_processed | 4,17 | 0,6898868 |
| ENSG00000231851 | ENSG00000231851 |   | 2  | 105097052 | 105102944 | antisense             | 4,17 | 3,27E-03  |
| ENSG00000234393 | ENSG00000234393 |   | 10 | 113710681 | 113719332 | antisense             | 4,15 | 0,3318209 |
| ENSG00000230483 | ENSG00000230483 |   | 11 | 2404515   | 2407908   | antisense             | 4,13 | 0,512233  |
| ENSG00000198153 | ZNF849P         |   | 19 | 22685167  | 22686732  | unprocessed_pseudog   | 4,12 | 0,5682268 |
| ENSG00000204745 | ENSG00000204745 |   | 2  | 87125390  | 87196647  | unprocessed_pseudog   | 4,12 | 0,1187106 |
| ENSG00000230333 | ENSG00000230333 |   | 7  | 11180902  | 11520175  | processed_transcript  | 4,11 | 9,18E-02  |
| ENSG00000180042 | OR1R1P          |   | 17 | 3385930   | 3386833   | unprocessed_pseudog   | 4,10 | 0,1217903 |
| ENSG00000264067 | ENSG00000264067 |   | 17 | 10320392  | 10341458  | antisense             | 4,10 | 0,4036702 |
| ENSG00000261161 | ENSG00000261161 |   | 16 | 86646301  | 86668923  | lincRNA               | 4,10 | 0,4036702 |
| ENSG00000231518 | ENSG00000231518 |   | 9  | 35930012  | 35937151  | antisense             | 4,10 | 2,95E-02  |
| ENSG00000249734 | ENSG00000249734 |   | 5  | 6795880   | 6826728   | lincRNA               | 4,10 | 0,4036702 |
| ENSG00000254239 | ENSG00000254239 |   | 5  | 135897637 | 135900250 | lincRNA               | 4,10 | 1,3038915 |
| ENSG00000214210 | ENSG00000214210 |   | 3  | 164001606 | 164002465 | processed_pseudogen   | 4,10 | 1,3038915 |
| ENSG00000271413 | ENSG00000271413 |   | 3  | 176069107 | 176069252 | processed_pseudogen   | 4,10 | 0,8926569 |
| ENSG00000237220 | ENSG00000237220 |   | 2  | 150566134 | 150568080 | lincRNA               | 4,10 | 0,4036702 |
| ENSG00000226436 | ENSG00000226436 | X |    | 28659065  | 28659469  | processed_pseudogen   | 4,10 | 2,95E-02  |
| ENSG00000253893 | FAM85B          |   | 8  | 8167819   | 8226614   | antisense             | 4,10 | 0,5682268 |
| ENSG00000254802 | ENSG00000254802 |   | 8  | 60965802  | 60967775  | lincRNA               | 4,10 | 0,5682268 |
| ENSG00000248568 | KRT8P48         |   | 5  | 146706381 | 146707600 | processed_pseudogen   | 4,09 | 1,6498059 |
| ENSG00000270207 | ENSG00000270207 |   | 3  | 7606890   | 7607897   | antisense             | 4,09 | 1,2188867 |
| ENSG00000229291 | ENSG00000229291 |   | 1  | 235957879 | 235971825 | lincRNA               | 4,09 | 0,1836819 |
| ENSG00000214432 | ENSG00000214432 |   | 15 | 91022619  | 91036611  | antisense             | 4,08 | 0,2746192 |
| ENSG00000261222 | ENSG00000261222 |   | 17 | 74599840  | 74607229  | lincRNA               | 4,08 | 0,512233  |
| ENSG00000270750 | ENSG00000270750 |   | 4  | 152320544 | 152321044 | lincRNA               | 4,07 | 1,6174211 |
| ENSG00000271711 | ENSG00000271711 |   | 3  | 150611262 | 150611877 | processed_pseudogen   | 4,06 | 1,1047191 |
| ENSG00000236438 | FAM157A         |   | 3  | 198153287 | 198222513 | transcribed_unproces  | 4,05 | 0,4909563 |
| ENSG00000227751 | ENSG00000227751 |   | 1  | 17406760  | 17407382  | antisense             | 4,03 | 0,0358681 |
| ENSG00000279184 | ENSG00000279184 |   | 22 | 35160947  | 35215025  | antisense             | 4,02 | 0,1187106 |

|                 |                 |   |    |           |           |                       |      |           |
|-----------------|-----------------|---|----|-----------|-----------|-----------------------|------|-----------|
| ENSG00000215086 | NPM1P24         |   | 10 | 72917641  | 72918534  | processed_pseudogen   | 4,01 | 0,5682268 |
| ENSG00000204666 | ENSG00000204666 |   | 19 | 50050589  | 50066793  | sense_overlapping     | 4,00 | 0,8926569 |
| ENSG00000263818 | ENSG00000263818 |   | 17 | 39057019  | 39113190  | transcribed_processed | 4,00 | 1,1047191 |
| ENSG00000258611 | ENSG00000258611 |   | 15 | 93065586  | 93066606  | transcribed_processed | 4,00 | 0,4036702 |
| ENSG00000258065 | ENSG00000258065 |   | 14 | 28857384  | 28858701  | processed_pseudogen   | 4,00 | 0,8926569 |
| ENSG00000259048 | ENSG00000259048 |   | 14 | 38034287  | 38194281  | antisense             | 4,00 | 0,8926569 |
| ENSG00000256172 | ENSG00000256172 |   | 12 | 67440998  | 67442559  | lincRNA               | 4,00 | 1,3038915 |
| ENSG00000257835 | ENSG00000257835 |   | 12 | 77379820  | 77390864  | lincRNA               | 4,00 | 0,5865398 |
| ENSG00000254792 | ENSG00000254792 |   | 11 | 67840942  | 67841049  | processed_pseudogen   | 4,00 | 0,1217903 |
| ENSG00000249600 | ENSG00000249600 |   | 5  | 121671373 | 121671872 | processed_pseudogen   | 4,00 | 0,5865398 |
| ENSG00000250266 | LINC01612       |   | 4  | 170273919 | 170283079 | lincRNA               | 4,00 | 0,1217903 |
| ENSG00000250753 | ENSG00000250753 |   | 4  | 49579833  | 49580189  | processed_pseudogen   | 4,00 | 0,5682268 |
| ENSG00000259855 | ENSG00000259855 |   | 2  | 216995906 | 216996490 | lincRNA               | 4,00 | 0,5865398 |
| ENSG00000270039 | ENSG00000270039 |   | 12 | 57803838  | 57804415  | lincRNA               | 3,99 | 0,3565078 |
| ENSG00000124097 | HMGB1P1         |   | 20 | 57488392  | 57489027  | processed_pseudogen   | 3,94 | 0,6309753 |
| ENSG00000269332 | GOLGA2P9        |   | 19 | 22596257  | 22603550  | transcribed_unproces  | 3,93 | 1,0789438 |
| ENSG00000262668 | ENSG00000262668 |   | 16 | 3188212   | 3224779   | antisense             | 3,93 | 1,4697798 |
| ENSG00000250261 | CCDC74BP1       |   | 22 | 20587496  | 20592218  | unprocessed_pseudog   | 3,93 | 0,7095968 |
| ENSG00000241220 | ENSG00000241220 |   | 3  | 153357107 | 153374186 | lincRNA               | 3,92 | 0,6526668 |
| ENSG00000254568 | ENSG00000254568 |   | 11 | 124883691 | 124887789 | antisense             | 3,92 | 0,7582127 |
| ENSG00000272746 | ENSG00000272746 |   | 18 | 13526078  | 13526688  | sense_intronic        | 3,92 | 1,4697798 |
| ENSG00000258738 | ENSG00000258738 |   | 14 | 34874343  | 34876459  | antisense             | 3,91 | 0,8926569 |
| ENSG00000238186 | ENSG00000238186 |   | 1  | 40515754  | 40517174  | antisense             | 3,90 | 0,1392851 |
| ENSG00000267284 | ENSG00000267284 |   | 18 | 55721063  | 55788761  | lincRNA               | 3,90 | 0,4036702 |
| ENSG00000255945 | ENSG00000255945 |   | 12 | 127598168 | 127599715 | lincRNA               | 3,90 | 1,8851183 |
| ENSG00000257265 | ENSG00000257265 |   | 12 | 71007773  | 71032083  | lincRNA               | 3,90 | 1,8851183 |
| ENSG00000274373 | ENSG00000274373 |   | 12 | 132424504 | 132425208 | lincRNA               | 3,90 | 1,8851183 |
| ENSG00000248935 | ENSG00000248935 |   | 5  | 60021249  | 60033020  | antisense             | 3,90 | 1,8851183 |
| ENSG00000233461 | ENSG00000233461 |   | 1  | 231522388 | 231528556 | antisense             | 3,90 | 0,1217903 |
| ENSG00000242375 | ENSG00000242375 |   | 9  | 97195351  | 97197687  | lincRNA               | 3,88 | 0,8468482 |
| ENSG00000233544 | EIF3KP2         |   | 3  | 24555834  | 24556459  | processed_pseudogen   | 3,86 | 0,1217903 |
| ENSG00000235574 | ENSG00000235574 |   | 7  | 27491682  | 27492765  | processed_pseudogen   | 3,86 | 0,7095968 |
| ENSG00000232034 | ENSG00000232034 |   | 2  | 100822661 | 100847220 | sense_intronic        | 3,84 | 1,6739638 |
| ENSG00000253744 | ENSG00000253744 |   | 5  | 66144156  | 66144795  | antisense             | 3,83 | 0,8926569 |
| ENSG00000251018 | HMMR-AS1        |   | 5  | 163483065 | 163494058 | antisense             | 3,82 | 1,547231  |
| ENSG00000175509 | ENSG00000175509 |   | 2  | 113667478 | 113668621 | processed_pseudogen   | 3,82 | 1,1217155 |
| ENSG00000227008 | ENSG00000227008 | X |    | 133670971 | 133671386 | processed_pseudogen   | 3,81 | 1,2188867 |
| ENSG00000245768 | ENSG00000245768 |   | 16 | 58733912  | 59108974  | lincRNA               | 3,81 | 1,95E-02  |
| ENSG00000240207 | ENSG00000240207 |   | 3  | 158732263 | 158784070 | antisense             | 3,81 | 0,6309753 |
| ENSG00000239213 | NCK1-AS1        |   | 3  | 136841726 | 136862054 | antisense             | 3,80 | 1,5943798 |
| ENSG00000225785 | ENSG00000225785 |   | 20 | 52451464  | 52455619  | lincRNA               | 3,80 | 0,4036702 |
| ENSG00000255775 | ENSG00000255775 |   | 12 | 6155035   | 6160719   | lincRNA               | 3,80 | 0,8926569 |
| ENSG00000258026 | ENSG00000258026 |   | 12 | 81094375  | 81125845  | antisense             | 3,80 | 1,3038915 |
| ENSG00000275427 | ENSG00000275427 |   | 8  | 1296034   | 1302607   | lincRNA               | 3,80 | 0,8926569 |
| ENSG00000224374 | ENSG00000224374 |   | 6  | 13525996  | 135260933 | antisense             | 3,80 | 0,8926569 |
| ENSG00000250509 | ENSG00000250509 |   | 5  | 180441559 | 180443238 | lincRNA               | 3,80 | 0,4036702 |
| ENSG00000248432 | ENSG00000248432 |   | 4  | 111804418 | 111809694 | lincRNA               | 3,80 | 0,8926569 |
| ENSG00000249998 | ENSG00000249998 |   | 4  | 16973275  | 17073903  | lincRNA               | 3,80 | 0,8926569 |
| ENSG00000271964 | ENSG00000271964 |   | 3  | 16314439  | 16314987  | antisense             | 3,80 | 2,0846889 |
| ENSG00000231083 | ENSG00000231083 |   | 2  | 8600892   | 8622942   | lincRNA               | 3,80 | 0,8926569 |
| ENSG00000234898 | CHEK2P3         |   | 2  | 91957436  | 91963610  | unprocessed_pseudog   | 3,80 | 0,5865398 |
| ENSG00000259792 | ENSG00000259792 |   | 15 | 77993405  | 77995289  | antisense             | 3,79 | 9,18E-02  |
| ENSG00000243175 | RPSAP36         |   | 4  | 143424753 | 143426013 | transcribed_processed | 3,77 | 1,2188867 |
| ENSG00000231940 | RPS7P3          |   | 1  | 233288868 | 233289447 | processed_pseudogen   | 3,77 | 2,0846889 |
| ENSG00000229981 | LINC01435       |   | 10 | 107694973 | 108197849 | lincRNA               | 3,75 | 9,18E-02  |
| ENSG00000233633 | ENSG00000233633 |   | 2  | 558204    | 578145    | lincRNA               | 3,75 | 1,6739638 |
| ENSG00000225912 | ENSG00000225912 | X |    | 92676519  | 92676954  | processed_pseudogen   | 3,73 | 0,1187106 |
| ENSG00000253524 | ENSG00000253524 |   | 8  | 36004316  | 36095046  | lincRNA               | 3,73 | 1,1964007 |
| ENSG00000232746 | ENSG00000232746 |   | 3  | 12877522  | 12885211  | lincRNA               | 3,73 | 1,2188867 |

|                 |                 |    |           |           |                       |      |           |
|-----------------|-----------------|----|-----------|-----------|-----------------------|------|-----------|
| ENSG00000254760 | ENSG00000254760 | 19 | 51414298  | 51414965  | antisense             | 3,72 | 0,8468482 |
| ENSG00000231650 | RFESDP1         | 13 | 22850101  | 22850561  | processed_pseudogen   | 3,70 | 1,6739638 |
| ENSG00000231620 | ENSG00000231620 | 21 | 19301613  | 19303739  | lincRNA               | 3,70 | 0,4036702 |
| ENSG00000214318 | ATP5G1P6        | 18 | 63496989  | 63497400  | processed_pseudogen   | 3,70 | 0,5865398 |
| ENSG00000258474 | ENSG00000258474 | 14 | 31944853  | 31950382  | lincRNA               | 3,70 | 1,8851183 |
| ENSG00000254399 | GLYATL1P4       | 11 | 59042737  | 59050971  | unprocessed_pseudogen | 3,70 | 1,3038915 |
| ENSG00000254991 | ENSG00000254991 | 11 | 12066929  | 12073014  | lincRNA               | 3,70 | 0,5865398 |
| ENSG00000271897 | ENSG00000271897 | 6  | 11607552  | 11607981  | lincRNA               | 3,70 | 0,8926569 |
| ENSG00000281608 | ENSG00000281608 | 5  | 125325350 | 125367734 | lincRNA               | 3,70 | 1,3038915 |
| ENSG00000248242 | ENSG00000248242 | 4  | 104653874 | 104966793 | lincRNA               | 3,70 | 0,4036702 |
| ENSG00000249519 | LINC01438       | 4  | 110794403 | 110797344 | lincRNA               | 3,70 | 0,8926569 |
| ENSG00000250064 | ENSG00000250064 | 4  | 28435449  | 28600275  | lincRNA               | 3,70 | 0,5865398 |
| ENSG00000232498 | ENSG00000232498 | 1  | 192517639 | 192567217 | antisense             | 3,70 | 0,8926569 |
| ENSG00000240785 | RPL36AP21       | 5  | 18049550  | 18049872  | processed_pseudogen   | 3,69 | 1,6739638 |
| ENSG00000247193 | ENSG00000247193 | 4  | 36244116  | 36274220  | antisense             | 3,68 | 0,6526668 |
| ENSG00000218890 | NUFIP1P         | 6  | 66093431  | 66094909  | processed_pseudogen   | 3,67 | 1,8851183 |
| ENSG00000249364 | ENSG00000249364 | 5  | 67379378  | 67805238  | lincRNA               | 3,67 | 0,4850164 |
| ENSG00000227091 | ENSG00000227091 | 1  | 110166186 | 110172489 | antisense             | 3,65 | 1,6174211 |
| ENSG00000225764 | P3H2-AS1        | 3  | 190120964 | 190144846 | antisense             | 3,64 | 0,3318209 |
| ENSG00000213557 | ENSG00000213557 | 9  | 108040213 | 108040592 | processed_pseudogen   | 3,64 | 1,1217155 |
| ENSG00000233478 | ENSG00000233478 | 1  | 25644544  | 25659111  | antisense             | 3,64 | 1,1217155 |
| ENSG00000254271 | ENSG00000254271 | 10 | 60734342  | 60741828  | lincRNA               | 3,63 | 1,6739638 |
| ENSG00000272874 | ENSG00000272874 | 20 | 267186    | 268857    | lincRNA               | 3,60 | 0,8926569 |
| ENSG00000269365 | ENSG00000269365 | 18 | 47878295  | 47882444  | antisense             | 3,60 | 0,1392851 |
| ENSG00000257391 | MIR3180-4       | 16 | 15154903  | 15157020  | lincRNA               | 3,60 | 1,3038915 |
| ENSG00000268754 | ENSG00000268754 | 16 | 86225580  | 86275745  | lincRNA               | 3,60 | 0,5865398 |
| ENSG00000269186 | LINC01082       | 16 | 86196181  | 86199720  | lincRNA               | 3,60 | 0,5865398 |
| ENSG00000259434 | ENSG00000259434 | 15 | 37365027  | 37490808  | lincRNA               | 3,60 | 0,5865398 |
| ENSG00000242293 | ENSG00000242293 | 14 | 69023150  | 69023308  | processed_pseudogen   | 3,60 | 1,3038915 |
| ENSG00000259106 | ENSG00000259106 | 14 | 79611418  | 79633311  | antisense             | 3,60 | 0,5865398 |
| ENSG00000213049 | HNRNPA1P34      | 12 | 9027532   | 9029089   | processed_pseudogen   | 3,60 | 1,3038915 |
| ENSG00000254334 | ENSG00000254334 | 8  | 21298206  | 21309449  | lincRNA               | 3,60 | 0,5865398 |
| ENSG00000230372 | ENSG00000230372 | 6  | 25061625  | 25063507  | lincRNA               | 3,60 | 1,3038915 |
| ENSG00000240241 | ENSG00000240241 | 3  | 78266940  | 78294731  | lincRNA               | 3,60 | 0,1217903 |
| ENSG00000241168 | ENSG00000241168 | 3  | 163026396 | 163232149 | lincRNA               | 3,60 | 0,5865398 |
| ENSG00000223530 | ENSG00000223530 | 2  | 23330664  | 23332044  | lincRNA               | 3,60 | 1,8851183 |
| ENSG00000231918 | ENSG00000231918 | 2  | 51032601  | 52407917  | lincRNA               | 3,60 | 1,3038915 |
| ENSG00000233934 | RPL21P38        | 2  | 171587093 | 171587259 | processed_pseudogen   | 3,60 | 0,5865398 |
| ENSG00000226530 | ENSG00000226530 | X  | 51396511  | 51465661  | lincRNA               | 3,60 | 0,5865398 |
| ENSG00000282317 | ENSG00000282317 | 1  | 244731024 | 244731586 | lincRNA               | 3,59 | 0,7582127 |
| ENSG00000227615 | ENSG00000227615 | 11 | 74745716  | 74746114  | processed_pseudogen   | 3,58 | 1,1217155 |
| ENSG00000250751 | ENSG00000250751 | 17 | 49708334  | 49720060  | antisense             | 3,55 | 0,512233  |
| ENSG00000260430 | ENSG00000260430 | 16 | 19086856  | 19098110  | lincRNA               | 3,55 | 0,1836819 |
| ENSG00000235071 | ENSG00000235071 | X  | 16474342  | 16475340  | processed_pseudogen   | 3,55 | 2,007219  |
| ENSG00000246263 | UBR5-AS1        | 8  | 102239394 | 102253333 | antisense             | 3,54 | 1,2188867 |
| ENSG00000253851 | ENSG00000253851 | 8  | 103228425 | 103229314 | antisense             | 3,52 | 1,4448456 |
| ENSG00000259001 | ENSG00000259001 | 14 | 20343048  | 20343685  | antisense             | 3,52 | 0,8468482 |
| ENSG00000225739 | NPM1P18         | 7  | 36818959  | 36819690  | processed_pseudogen   | 3,51 | 0,512233  |
| ENSG00000229876 | CASC20          | 20 | 6446723   | 6528459   | lincRNA               | 3,50 | 0,8926569 |
| ENSG00000277453 | ENSG00000277453 | 19 | 40426115  | 40426702  | lincRNA               | 3,50 | 1,3038915 |
| ENSG00000263004 | ENSG00000263004 | 17 | 57078298  | 57085024  | lincRNA               | 3,50 | 0,4850164 |
| ENSG00000259560 | ENSG00000259560 | 15 | 87432058  | 87703852  | lincRNA               | 3,50 | 0,5865398 |
| ENSG00000259616 | ENSG00000259616 | 15 | 61298791  | 61635449  | lincRNA               | 3,50 | 0,8926569 |
| ENSG00000226695 | ANKRD20A10P     | 13 | 24750657  | 24752171  | processed_pseudogen   | 3,50 | 0,8926569 |
| ENSG00000255258 | ENSG00000255258 | 11 | 133783671 | 133810376 | lincRNA               | 3,50 | 0,5865398 |
| ENSG00000260049 | ENSG00000260049 | 6  | 22260424  | 22317798  | antisense             | 3,50 | 0,5865398 |
| ENSG00000229855 | ENSG00000229855 | 5  | 121199704 | 121357398 | lincRNA               | 3,50 | 0,1217903 |
| ENSG00000249945 | ENSG00000249945 | 4  | 175458289 | 175466697 | lincRNA               | 3,50 | 0,8926569 |
| ENSG00000240405 | LINC01212       | 3  | 69999577  | 70015318  | lincRNA               | 3,50 | 0,8926569 |

|                 |                 |    |           |           |                                    |      |           |
|-----------------|-----------------|----|-----------|-----------|------------------------------------|------|-----------|
| ENSG00000250433 | CLSTN2-AS1      | 3  | 140505611 | 140508789 | antisense                          | 3,50 | 0,4036702 |
| ENSG00000234932 | ENSG00000234932 | 2  | 152850653 | 152850824 | processed_pseudogene               | 3,50 | 0,8926569 |
| ENSG00000271597 | ENSG00000271597 | 2  | 69251818  | 69252364  | processed_pseudogene               | 3,50 | 0,4036702 |
| ENSG00000224260 | ENSG00000224260 | 1  | 209528455 | 209567673 | lincRNA                            | 3,50 | 0,8926569 |
| ENSG00000214881 | TMEM14DP        | 10 | 68544489  | 68544833  | processed_pseudogene               | 3,48 | 0,0358681 |
| ENSG00000251056 | ANKRD20A17P     | 4  | 49502145  | 49506022  | unprocessed_pseudogene             | 3,47 | 0,8468482 |
| ENSG00000268119 | ENSG00000268119 | 19 | 21444241  | 21463908  | processed_transcript               | 3,47 | 0         |
| ENSG00000255442 | ENSG00000255442 | 11 | 50170156  | 50190441  | unprocessed_pseudogene             | 3,46 | 1,4697798 |
| ENSG00000224965 | KCNC4-AS1       | 1  | 110208834 | 110209987 | antisense                          | 3,46 | 0,6526668 |
| ENSG00000233971 | RPS20P10        | 2  | 71984182  | 71984434  | processed_pseudogene               | 3,45 | 1,8851183 |
| ENSG00000281501 | SEPSECS-AS1     | 4  | 25160641  | 25201440  | antisense                          | 3,44 | 1,0510989 |
| ENSG00000251533 | LINC00605       | 14 | 103187221 | 103189028 | lincRNA                            | 3,43 | 0,8926569 |
| ENSG00000231185 | ENSG00000231185 | 5  | 142325293 | 142672001 | antisense                          | 3,43 | 1,95E-02  |
| ENSG00000232998 | VPS13A-AS1      | 9  | 77176756  | 77177994  | antisense                          | 3,42 | 1,0177863 |
| ENSG00000276385 | ENSG00000276385 | 20 | 8934984   | 8935481   | processed_pseudogene               | 3,40 | 0,8926569 |
| ENSG00000260026 | ENSG00000260026 | 16 | 86720688  | 86721954  | lincRNA                            | 3,40 | 1,3038915 |
| ENSG00000177350 | RPL13AP3        | 14 | 55766177  | 55767717  | transcribed_processed_transcript   | 3,40 | 0,5682268 |
| ENSG00000230157 | ATP5G1P1        | 14 | 105536861 | 105537239 | processed_pseudogene               | 3,40 | 0,4036702 |
| ENSG00000198671 | ENSG00000198671 | 12 | 65017468  | 65054124  | antisense                          | 3,40 | 0,5865398 |
| ENSG00000241825 | RPL7P42         | 12 | 68684595  | 68686308  | processed_pseudogene               | 3,40 | 0,1217903 |
| ENSG00000175728 | C11orf44        | 11 | 130672956 | 130717352 | lincRNA                            | 3,40 | 0,4036702 |
| ENSG00000254561 | ENSG00000254561 | 11 | 119608423 | 119659284 | antisense                          | 3,40 | 0,1217903 |
| ENSG00000254768 | ENSG00000254768 | 11 | 22283730  | 22338245  | antisense                          | 3,40 | 0,8926569 |
| ENSG00000236842 | ENSG00000236842 | 10 | 75430571  | 75431588  | antisense                          | 3,40 | 0,4036702 |
| ENSG00000253929 | CASC21          | 8  | 127339274 | 127392631 | lincRNA                            | 3,40 | 1,3038915 |
| ENSG00000271654 | ENSG00000271654 | 8  | 18387108  | 18387777  | processed_pseudogene               | 3,40 | 0,8926569 |
| ENSG00000236978 | ENSG00000236978 | 7  | 70837738  | 70838013  | processed_pseudogene               | 3,40 | 1,3038915 |
| ENSG00000235994 | ENSG00000235994 | 6  | 167975924 | 167979776 | lincRNA                            | 3,40 | 1,8851183 |
| ENSG00000248752 | ENSG00000248752 | 5  | 126076800 | 126279801 | lincRNA                            | 3,40 | 1,3038915 |
| ENSG00000250167 | ENSG00000250167 | 5  | 135559577 | 135634874 | antisense                          | 3,40 | 0,5865398 |
| ENSG00000271235 | ENSG00000271235 | 3  | 22811390  | 22812047  | processed_pseudogene               | 3,40 | 1,3038915 |
| ENSG00000229568 | SMC4P1          | 2  | 136544712 | 136545542 | unprocessed_pseudogene             | 3,40 | 0,8926569 |
| ENSG00000225366 | TDGF1P3         | X  | 110520312 | 110523021 | transcribed_processed_transcript   | 3,39 | 0,8926569 |
| ENSG00000255511 | ENSG00000255511 | 11 | 18870989  | 18873462  | processed_pseudogene               | 3,38 | 0,4036702 |
| ENSG00000262636 | ENSG00000262636 | 16 | 11380859  | 11381118  | processed_pseudogene               | 3,38 | 0,512233  |
| ENSG00000228929 | RPS13P2         | 1  | 52772194  | 52772648  | processed_pseudogene               | 3,35 | 0,8926569 |
| ENSG00000238178 | ENSG00000238178 | X  | 16152941  | 16170869  | antisense                          | 3,35 | 1,2188867 |
| ENSG00000230629 | RPS23P8         | X  | 70962964  | 70963293  | processed_pseudogene               | 3,35 | 1,1217155 |
| ENSG00000255909 | PDCD5P1         | 12 | 19413153  | 19413461  | processed_pseudogene               | 3,34 | 1,6739638 |
| ENSG00000272910 | ENSG00000272910 | 3  | 179583262 | 179583762 | antisense                          | 3,34 | 0,4036702 |
| ENSG00000229534 | HNRNPA1P53      | 11 | 5571247   | 5572192   | processed_pseudogene               | 3,33 | 0,512233  |
| ENSG00000227852 | ENSG00000227852 | 9  | 35592786  | 35592951  | processed_pseudogene               | 3,33 | 0,2746192 |
| ENSG00000255202 | ENSG00000255202 | 11 | 33665220  | 33696701  | antisense                          | 3,32 | 7,06E-02  |
| ENSG00000265055 | ENSG00000265055 | 17 | 68096046  | 68101474  | lincRNA                            | 3,31 | 1,2188867 |
| ENSG00000259354 | ENSG00000259354 | 15 | 45448427  | 45513767  | antisense                          | 3,31 | 0,6526668 |
| ENSG00000228962 | HCG23           | 6  | 32390510  | 32393686  | antisense                          | 3,30 | 0,5865398 |
| ENSG00000234964 | FABP5P7         | 11 | 59781318  | 59781722  | processed_pseudogene               | 3,30 | 0,4036702 |
| ENSG00000260701 | ENSG00000260701 | 16 | 77433382  | 77444336  | antisense                          | 3,30 | 0,4036702 |
| ENSG00000261436 | ENSG00000261436 | 16 | 60359842  | 60442245  | lincRNA                            | 3,30 | 1,3038915 |
| ENSG00000273553 | ENSG00000273553 | 16 | 27687182  | 27687522  | sense_intronic                     | 3,30 | 0,5865398 |
| ENSG00000187812 | ENSG00000187812 | 15 | 75775553  | 75786898  | transcribed_unprocessed_transcript | 3,30 | 1,8851183 |
| ENSG00000227862 | HNRNPA1P31      | 13 | 80619098  | 80620067  | processed_pseudogene               | 3,30 | 1,3038915 |
| ENSG00000249926 | ENSG00000249926 | 12 | 131662596 | 131664704 | lincRNA                            | 3,30 | 1,3038915 |
| ENSG00000258159 | IMMP1LP2        | 12 | 113015607 | 113016098 | processed_pseudogene               | 3,30 | 1,3038915 |
| ENSG00000243316 | GUCY2GP         | 10 | 112308181 | 112356574 | unitary_pseudogene                 | 3,30 | 0,5865398 |
| ENSG00000260863 | CYP2C60P        | 10 | 95009674  | 95009812  | unprocessed_pseudogene             | 3,30 | 0,5865398 |
| ENSG00000234675 | ENSG00000234675 | 6  | 148017422 | 148020974 | lincRNA                            | 3,30 | 1,8851183 |
| ENSG00000226994 | ENSG00000226994 | 2  | 34799850  | 35185689  | lincRNA                            | 3,30 | 1,3038915 |
| ENSG00000204380 | ENSG00000204380 | 2  | 158658337 | 158735002 | antisense                          | 3,30 | 3,27E-03  |

|                 |                 |    |           |           |                       |      |           |
|-----------------|-----------------|----|-----------|-----------|-----------------------|------|-----------|
| ENSG00000234026 | ENSG00000234026 | 10 | 95228243  | 95231144  | antisense             | 3,29 | 0,4850164 |
| ENSG00000235944 | ZNF815P         | 7  | 5823160   | 5854435   | transcribed_unproces  | 3,29 | 0,2746192 |
| ENSG00000225778 | PROSER2-AS1     | 10 | 11849608  | 11894700  | antisense             | 3,29 | 0,8468482 |
| ENSG00000272973 | ENSG00000272973 | 22 | 23856427  | 23857039  | antisense             | 3,29 | 1,1217155 |
| ENSG00000273693 | C2orf27AP1      | X  | 11085476  | 11086061  | processed_pseudoger   | 3,28 | 1,3038915 |
| ENSG00000241741 | RPL7AP30        | 4  | 112788083 | 112788878 | processed_pseudoger   | 3,28 | 0,1187106 |
| ENSG00000255794 | RMST            | 12 | 97431653  | 97565035  | processed_transcript  | 3,27 | 1,1964007 |
| ENSG00000182383 | RPL27AP5        | 5  | 74990189  | 74990637  | processed_pseudoger   | 3,27 | 1,1217155 |
| ENSG00000213881 | NPM1P6          | 8  | 61202350  | 61203220  | processed_pseudoger   | 3,27 | 9,18E-02  |
| ENSG00000258913 | ENSG00000258913 | 14 | 104223584 | 104288069 | lincRNA               | 3,26 | 1,5215308 |
| ENSG00000240975 | ENSG00000240975 | 11 | 39161453  | 39161967  | processed_pseudoger   | 3,24 | 0,4332376 |
| ENSG00000258136 | ENSG00000258136 | 12 | 107736555 | 107759968 | antisense             | 3,24 | 0,7582127 |
| ENSG00000262160 | ENSG00000262160 | 16 | 68225969  | 68229145  | antisense             | 3,24 | 2,95E-02  |
| ENSG00000267184 | ENSG00000267184 | 17 | 69707193  | 69707373  | processed_pseudoger   | 3,23 | 1,1217155 |
| ENSG00000249502 | ENSG00000249502 | 4  | 17587467  | 17614571  | antisense             | 3,23 | 1,2188867 |
| ENSG00000232936 | ENSG00000232936 | 10 | 89645282  | 89650667  | antisense             | 3,23 | 0,8108966 |
| ENSG00000143429 | ENSG00000143429 | 2  | 91617160  | 91659972  | transcribed_unproces  | 3,23 | 0,6898868 |
| ENSG00000230501 | ANKRD30BP3      | 10 | 45156775  | 45176925  | unprocessed_pseudog   | 3,22 | 0,4850164 |
| ENSG00000204792 | LINC01291       | 2  | 74918148  | 74938418  | lincRNA               | 3,22 | 0,6526668 |
| ENSG00000132832 | LINC01260       | 20 | 44656451  | 44696096  | antisense             | 3,20 | 0,7367804 |
| ENSG00000261156 | ENSG00000261156 | 17 | 34169372  | 34195937  | lincRNA               | 3,20 | 0,8926569 |
| ENSG00000276707 | ENSG00000276707 | 17 | 36940049  | 36943456  | antisense             | 3,20 | 0,4036702 |
| ENSG00000227468 | ENSG00000227468 | 14 | 105597691 | 105600209 | lincRNA               | 3,20 | 1,8851183 |
| ENSG00000241941 | RPL32P26        | 12 | 62658823  | 62659225  | processed_pseudoger   | 3,20 | 0,8926569 |
| ENSG00000256192 | ENSG00000256192 | 12 | 64266413  | 64266766  | processed_pseudoger   | 3,20 | 1,8851183 |
| ENSG00000257165 | ENSG00000257165 | 12 | 78448995  | 78540675  | lincRNA               | 3,20 | 0,8926569 |
| ENSG00000237565 | SSU72P5         | 11 | 4233286   | 4233869   | processed_pseudoger   | 3,20 | 0,8926569 |
| ENSG00000255171 | LINC01499       | 11 | 41714568  | 41836442  | lincRNA               | 3,20 | 0,4036702 |
| ENSG00000253711 | ENSG00000253711 | 8  | 61300164  | 61301069  | antisense             | 3,20 | 0,8926569 |
| ENSG00000253872 | ENSG00000253872 | 8  | 95505406  | 95527524  | lincRNA               | 3,20 | 1,8851183 |
| ENSG00000232821 | ENSG00000232821 | 7  | 19112474  | 19114271  | antisense             | 3,20 | 0,8926569 |
| ENSG00000243648 | ENSG00000243648 | 5  | 134422838 | 134423335 | processed_pseudoger   | 3,20 | 0,8926569 |
| ENSG00000249667 | LINC01259       | 4  | 38509767  | 38518056  | lincRNA               | 3,20 | 1,3038915 |
| ENSG00000250573 | ENSG00000250573 | 4  | 10259445  | 10260138  | processed_pseudoger   | 3,20 | 1,3038915 |
| ENSG00000236665 | ENSG00000236665 | 2  | 1158310   | 1160424   | antisense             | 3,20 | 1,3038915 |
| ENSG00000237556 | KCND3-AS1       | 1  | 111909336 | 111910931 | antisense             | 3,20 | 0,8926569 |
| ENSG00000259849 | VENTXP1         | X  | 26558337  | 26561052  | lincRNA               | 3,20 | 0,8926569 |
| ENSG00000262519 | TXNP4           | 17 | 4572206   | 4572515   | processed_pseudoger   | 3,19 | 0,5682268 |
| ENSG00000254744 | ENSG00000254744 | 15 | 99970215  | 99974010  | antisense             | 3,19 | 0,3565078 |
| ENSG00000239835 | ENSG00000239835 | 3  | 120028740 | 120029868 | processed_pseudoger   | 3,19 | 1,8851183 |
| ENSG00000249825 | ENSG00000249825 | 5  | 80052374  | 80083654  | antisense             | 3,19 | 2,95E-02  |
| ENSG00000231234 | SKP1P1          | 7  | 66423405  | 66423893  | processed_pseudoger   | 3,19 | 1,0510989 |
| ENSG00000249635 | ENSG00000249635 | 4  | 106003317 | 106022478 | antisense             | 3,18 | 0,4036702 |
| ENSG00000272345 | ENSG00000272345 | 6  | 24700907  | 24701793  | antisense             | 3,18 | 0,4909563 |
| ENSG00000261008 | LINC01572       | 16 | 72283301  | 72665009  | lincRNA               | 3,18 | 0,4332376 |
| ENSG00000188985 | DHFRP1          | 18 | 26170726  | 26171284  | processed_pseudoger   | 3,17 | 0,5682268 |
| ENSG00000236924 | ENSG00000236924 | 9  | 6645956   | 6670635   | lincRNA               | 3,17 | 0,512233  |
| ENSG00000261266 | ENSG00000261266 | 16 | 23687049  | 23687689  | antisense             | 3,15 | 1,547231  |
| ENSG00000273394 | ENSG00000273394 | 3  | 113947005 | 113947570 | antisense             | 3,12 | 1,6174211 |
| ENSG00000243779 | ENSG00000243779 | 18 | 13919603  | 13919923  | processed_pseudoger   | 3,10 | 1,3038915 |
| ENSG00000263553 | ENSG00000263553 | 18 | 24673163  | 24674348  | lincRNA               | 3,10 | 0,8926569 |
| ENSG00000267506 | ENSG00000267506 | 17 | 77546940  | 77563243  | lincRNA               | 3,10 | 1,3038915 |
| ENSG00000260177 | ENSG00000260177 | 16 | 87780134  | 87806476  | lincRNA               | 3,10 | 0,8926569 |
| ENSG00000261259 | ENSG00000261259 | 16 | 32951993  | 33028037  | transcribed_procresse | 3,10 | 1,3038915 |
| ENSG00000268505 | ENSG00000268505 | 16 | 86192793  | 86198913  | lincRNA               | 3,10 | 0,4036702 |
| ENSG00000254529 | ENSG00000254529 | 11 | 18863558  | 18864509  | unprocessed_pseudog   | 3,10 | 0,8926569 |
| ENSG00000254546 | ENSG00000254546 | 11 | 18196657  | 18197337  | processed_pseudoger   | 3,10 | 0,8926569 |
| ENSG00000255045 | ENSG00000255045 | 11 | 124744634 | 124746337 | antisense             | 3,10 | 0,8926569 |
| ENSG00000253634 | ENSG00000253634 | 8  | 92565443  | 92655494  | lincRNA               | 3,10 | 0,8926569 |

|                 |                 |    |           |           |                       |      |           |
|-----------------|-----------------|----|-----------|-----------|-----------------------|------|-----------|
| ENSG00000231533 | ENSG00000231533 | 6  | 79420297  | 79421305  | lincRNA               | 3,10 | 1,8851183 |
| ENSG00000249937 | ENSG00000249937 | 5  | 17684584  | 17955857  | lincRNA               | 3,10 | 0,1217903 |
| ENSG00000242936 | RPL30P6         | 4  | 95644952  | 95645293  | processed_pseudogen   | 3,10 | 1,3038915 |
| ENSG00000230299 | ENSG00000230299 | 2  | 85262144  | 85262267  | processed_pseudogen   | 3,10 | 0,8926569 |
| ENSG00000226715 | ENSG00000226715 | 1  | 101639548 | 101787572 | lincRNA               | 3,10 | 1,8851183 |
| ENSG00000261642 | ENSG00000261642 | 1  | 191151510 | 191154634 | lincRNA               | 3,10 | 0,5865398 |
| ENSG00000227528 | DIAPH3-AS1      | 13 | 60012751  | 60044357  | antisense             | 3,10 | 1,6739638 |
| ENSG00000213318 | ENSG00000213318 | 16 | 75192465  | 75193247  | processed_pseudogen   | 3,09 | 1,6739638 |
| ENSG00000259251 | ENSG00000259251 | 15 | 62060503  | 62062434  | antisense             | 3,09 | 1,6739638 |
| ENSG00000239523 | MYLK-AS1        | 3  | 123585542 | 123644568 | antisense             | 3,09 | 0,8468482 |
| ENSG00000267607 | ENSG00000267607 | 19 | 10285801  | 10289019  | antisense             | 3,09 | 9,18E-02  |
| ENSG00000266916 | ZNF793-AS1      | 19 | 37497159  | 37507046  | antisense             | 3,09 | 0,3565078 |
| ENSG00000234335 | RPS4XP11        | 10 | 32102522  | 32103293  | processed_pseudogen   | 3,07 | 1,4697798 |
| ENSG00000248608 | ENSG00000248608 | 4  | 25504997  | 25506675  | processed_pseudogen   | 3,05 | 1,2188867 |
| ENSG00000213862 | ENSG00000213862 | 15 | 47730144  | 47730935  | processed_pseudogen   | 3,05 | 0,1217903 |
| ENSG00000223561 | ENSG00000223561 | 7  | 25593351  | 25750994  | lincRNA               | 3,04 | 1,0789438 |
| ENSG00000271119 | ENSG00000271119 | 5  | 1594626   | 1611467   | lincRNA               | 3,03 | 1,8851183 |
| ENSG00000270020 | ENSG00000270020 | 16 | 86520383  | 86523897  | lincRNA               | 3,02 | 1,547231  |
| ENSG00000269210 | ENSG00000269210 | 2  | 38959287  | 38960342  | antisense             | 3,02 | 0,6309753 |
| ENSG00000183298 | RPSAP19         | 1  | 101786340 | 101787219 | processed_pseudogen   | 3,02 | 9,18E-02  |
| ENSG00000213959 | ENSG00000213959 | 20 | 38614913  | 38615476  | processed_pseudogen   | 3,00 | 1,1217155 |
| ENSG00000245598 | DACT3-AS1       | 19 | 46660364  | 46677447  | antisense             | 3,00 | 0,7582127 |
| ENSG00000248257 | PSG10P          | 19 | 42839368  | 42855718  | transcribed_unproces  | 3,00 | 0,8926569 |
| ENSG00000259445 | ENSG00000259445 | 15 | 81953303  | 81995666  | lincRNA               | 3,00 | 1,6498059 |
| ENSG00000257124 | ENSG00000257124 | 12 | 83661009  | 83661719  | lincRNA               | 3,00 | 1,8851183 |
| ENSG00000229205 | LINC00200       | 10 | 1159768   | 1164672   | lincRNA               | 3,00 | 1,6498059 |
| ENSG00000229019 | ENSG00000229019 | 9  | 68426843  | 68429369  | sense_intronic        | 3,00 | 0,5865398 |
| ENSG00000253916 | ENSG00000253916 | 8  | 133755845 | 133756646 | processed_pseudogen   | 3,00 | 1,3038915 |
| ENSG00000224999 | VTA1P1          | 6  | 169296471 | 169297959 | processed_pseudogen   | 3,00 | 0,4036702 |
| ENSG00000248477 | ENSG00000248477 | 5  | 69607099  | 69624049  | transcribed_unproces  | 3,00 | 1,3038915 |
| ENSG00000249746 | ENSG00000249746 | 5  | 96213346  | 96215075  | lincRNA               | 3,00 | 0,8926569 |
| ENSG00000250600 | ROPN1L-AS1      | 5  | 10441290  | 10441792  | antisense             | 3,00 | 0,8926569 |
| ENSG00000260066 | ENSG00000260066 | 5  | 1725149   | 1728172   | lincRNA               | 3,00 | 1,0177863 |
| ENSG00000249755 | ENSG00000249755 | 4  | 88527160  | 88528170  | processed_pseudogen   | 3,00 | 0,4036702 |
| ENSG00000224287 | MSL3P1          | 2  | 233865437 | 233868444 | transcribed_processed | 3,00 | 1,6174211 |
| ENSG00000231173 | ENSG00000231173 | 2  | 741977    | 749856    | lincRNA               | 3,00 | 1,3038915 |
| ENSG00000235721 | ENSG00000235721 | 2  | 110007675 | 110010783 | processed_pseudogen   | 3,00 | 0,4036702 |
| ENSG00000230937 | MIR205HG        | 1  | 209428820 | 209432838 | processed_transcript  | 3,00 | 0,8926569 |
| ENSG00000204904 | LINC01545       | X  | 46887417  | 46899703  | lincRNA               | 3,00 | 1,5943798 |
| ENSG00000235834 | ENSG00000235834 | X  | 17528435  | 17587160  | sense_intronic        | 3,00 | 0,512233  |
| ENSG00000228196 | PTPN2P1         | 1  | 178746683 | 178747754 | processed_pseudogen   | 2,99 | 0,4909563 |
| ENSG00000237943 | PRKCQ-AS1       | 10 | 6580419   | 6616452   | processed_transcript  | 2,98 | 0,1836819 |
| ENSG00000239557 | ENSG00000239557 | 3  | 52373652  | 52374882  | processed_pseudogen   | 2,96 | 0,5682268 |
| ENSG00000267255 | ENSG00000267255 | 19 | 4429689   | 4430934   | antisense             | 2,96 | 1,0789438 |
| ENSG00000257599 | OVCH1-AS1       | 12 | 29389294  | 29487488  | antisense             | 2,95 | 1,2188867 |
| ENSG00000261312 | ENSG00000261312 | 16 | 19706351  | 19715383  | antisense             | 2,95 | 1,3038915 |
| ENSG00000225555 | ENSG00000225555 | 21 | 34370802  | 34375348  | antisense             | 2,95 | 0,512233  |
| ENSG00000270945 | HSPE1P7         | 16 | 74612596  | 74613221  | processed_pseudogen   | 2,95 | 2,0846889 |
| ENSG00000249772 | ENSG00000249772 | 5  | 81113385  | 81114852  | antisense             | 2,94 | 1,3038915 |
| ENSG00000265401 | ENSG00000265401 | 17 | 16382152  | 16382669  | antisense             | 2,94 | 1,40E-02  |
| ENSG00000248360 | LINC00504       | 4  | 14470465  | 14888169  | lincRNA               | 2,93 | 0,7582127 |
| ENSG00000233296 | ENSG00000233296 | 2  | 677186    | 697371    | antisense             | 2,93 | 2,007219  |
| ENSG00000239467 | ENSG00000239467 | 2  | 170771113 | 170778148 | lincRNA               | 2,92 | 0,6898868 |
| ENSG00000226967 | HAUS4P1         | 1  | 170369223 | 170370367 | processed_pseudogen   | 2,92 | 0,7095968 |
| ENSG00000236404 | VLDLR-AS1       | 9  | 2422702   | 2643359   | antisense             | 2,92 | 0,6898868 |
| ENSG00000178464 | ENSG00000178464 | 19 | 12643275  | 12643919  | processed_pseudogen   | 2,91 | 4,86E-02  |
| ENSG00000258609 | LINC-ROR        | 18 | 57054559  | 57072119  | lincRNA               | 2,91 | 0,7582127 |
| ENSG00000255572 | ENSG00000255572 | 12 | 7166674   | 7189069   | antisense             | 2,91 | 1,1217155 |
| ENSG00000249395 | CASC9           | 8  | 75223404  | 75324741  | lincRNA               | 2,91 | 1,6739638 |

|                 |                 |    |           |           |                      |      |           |
|-----------------|-----------------|----|-----------|-----------|----------------------|------|-----------|
| ENSG00000254620 | ENSG00000254620 | 20 | 58594417  | 58603973  | lincRNA              | 2,90 | 0,8926569 |
| ENSG00000267606 | ENSG00000267606 | 19 | 56354493  | 56368053  | lincRNA              | 2,90 | 0,8926569 |
| ENSG00000257156 | ENSG00000257156 | 12 | 89048187  | 89309553  | lincRNA              | 2,90 | 1,3038915 |
| ENSG00000236671 | PRKG1-AS1       | 10 | 52230742  | 52314128  | antisense            | 2,90 | 0,4036702 |
| ENSG00000253281 | ENSG00000253281 | 8  | 58255771  | 58272119  | processed_transcript | 2,90 | 0,8926569 |
| ENSG00000282692 | ENSG00000282692 | 8  | 1018757   | 1019704   | lincRNA              | 2,90 | 0,8926569 |
| ENSG00000233437 | ENSG00000233437 | 7  | 56875385  | 56882146  | transcribed_unproces | 2,90 | 0,4036702 |
| ENSG00000234826 | ENSG00000234826 | 7  | 117998858 | 118004045 | lincRNA              | 2,90 | 0,8926569 |
| ENSG00000240790 | ENSG00000240790 | 7  | 127644685 | 127652012 | antisense            | 2,90 | 0,8926569 |
| ENSG00000216966 | ENSG00000216966 | 6  | 167208631 | 167208897 | processed_pseudoger  | 2,90 | 2,95E-02  |
| ENSG00000238254 | ENSG00000238254 | 5  | 79849552  | 79849846  | processed_pseudoger  | 2,90 | 1,3038915 |
| ENSG00000248965 | ENSG00000248965 | 5  | 168993000 | 168995677 | antisense            | 2,90 | 0,4036702 |
| ENSG00000226239 | ENSG00000226239 | 20 | 32027753  | 32031575  | antisense            | 2,88 | 1,8851183 |
| ENSG00000236532 | ENSG00000236532 | 21 | 28116094  | 28228667  | lincRNA              | 2,87 | 0,7582127 |
| ENSG00000268066 | FMR1-AS1        | X  | 147909431 | 147911817 | processed_transcript | 2,86 | 0,4909563 |
| ENSG00000267009 | ENSG00000267009 | 17 | 68413623  | 68524949  | processed_transcript | 2,85 | 7,06E-02  |
| ENSG00000258882 | ENSG00000258882 | 14 | 61811974  | 61970319  | lincRNA              | 2,85 | 0,3318209 |
| ENSG00000227879 | PSPC1P1         | 13 | 19201637  | 19227432  | unprocessed_pseudog  | 2,85 | 0,6526668 |
| ENSG00000214283 | RAD51AP1P1      | 3  | 136899076 | 136900076 | processed_pseudoger  | 2,85 | 2,0846889 |
| ENSG00000228541 | ENSG00000228541 | 2  | 62463127  | 62464070  | lincRNA              | 2,85 | 1,4697798 |
| ENSG00000270194 | ENSG00000270194 | 3  | 37241789  | 37244177  | antisense            | 2,85 | 2,0846889 |
| ENSG00000282418 | ENSG00000282418 | 1  | 225465021 | 225473837 | lincRNA              | 2,83 | 0,5682268 |
| ENSG00000270823 | ENSG00000270823 | 7  | 130495794 | 130498427 | antisense            | 2,83 | 1,2188867 |
| ENSG00000250195 | ENSG00000250195 | 4  | 138819954 | 139012646 | antisense            | 2,82 | 1,547231  |
| ENSG00000255441 | ENSG00000255441 | 19 | 51415724  | 51417425  | antisense            | 2,82 | 1,6739638 |
| ENSG00000248703 | ENSG00000248703 | 12 | 131296110 | 131297972 | lincRNA              | 2,82 | 0,2746192 |
| ENSG00000276853 | ENSG00000276853 | 12 | 65171262  | 65171917  | sense_intronic       | 2,82 | 1,2188867 |
| ENSG00000184414 | ENSG00000184414 | 7  | 100570131 | 100571136 | processed_pseudoger  | 2,81 | 0,7367804 |
| ENSG00000188314 | OR7D1P          | 19 | 9235144   | 9236076   | unprocessed_pseudog  | 2,80 | 0,5865398 |
| ENSG00000267175 | ENSG00000267175 | 18 | 61592375  | 61748832  | lincRNA              | 2,80 | 1,8851183 |
| ENSG00000260575 | ENSG00000260575 | 16 | 32250620  | 32254422  | antisense            | 2,80 | 0,6526668 |
| ENSG00000261218 | ENSG00000261218 | 16 | 81738248  | 81767868  | lincRNA              | 2,80 | 0,5865398 |
| ENSG00000229775 | ENSG00000229775 | 10 | 106140264 | 106188722 | lincRNA              | 2,80 | 0,8926569 |
| ENSG00000248222 | ENSG00000248222 | 5  | 169013227 | 169037998 | antisense            | 2,80 | 0,8926569 |
| ENSG00000249601 | LINC01187       | 5  | 170191579 | 170199141 | lincRNA              | 2,80 | 0,8926569 |
| ENSG00000250155 | ENSG00000250155 | 5  | 36666214  | 36725195  | antisense            | 2,80 | 0,8926569 |
| ENSG00000240354 | ENSG00000240354 | 3  | 161816909 | 161821908 | lincRNA              | 2,80 | 0,8926569 |
| ENSG00000277241 | ENSG00000277241 | 3  | 177700346 | 177701072 | processed_pseudoger  | 2,80 | 0,8926569 |
| ENSG00000224626 | ENSG00000224626 | 2  | 18784807  | 18787752  | lincRNA              | 2,80 | 1,3038915 |
| ENSG00000225446 | ENSG00000225446 | 1  | 90851759  | 90855253  | lincRNA              | 2,80 | 0,8926569 |
| ENSG00000227538 | HNRNPFP1        | 1  | 42040597  | 42041729  | processed_pseudoger  | 2,80 | 0,5865398 |
| ENSG00000271917 | ENSG00000271917 | 1  | 164828436 | 164829952 | sense_intronic       | 2,80 | 0,4036702 |
| ENSG00000237171 | ENSG00000237171 | X  | 26223903  | 26224658  | unprocessed_pseudog  | 2,80 | 0,8926569 |
| ENSG00000260683 | ENSG00000260683 | X  | 127660631 | 127662530 | lincRNA              | 2,80 | 0,4036702 |
| ENSG00000254449 | SF3A3P2         | 11 | 123597946 | 123599452 | processed_pseudoger  | 2,79 | 1,547231  |
| ENSG00000229388 | ENSG00000229388 | 1  | 28643228  | 28648581  | lincRNA              | 2,79 | 0,5682268 |
| ENSG00000249631 | ENSG00000249631 | 4  | 11625714  | 11813958  | lincRNA              | 2,77 | 0,5865398 |
| ENSG00000242071 | RPL7AP6         | 14 | 69885340  | 69886140  | processed_pseudoger  | 2,76 | 4,86E-02  |
| ENSG00000267605 | ENSG00000267605 | 19 | 37265939  | 37271518  | lincRNA              | 2,75 | 1,6498059 |
| ENSG00000178081 | ULK4P3          | 15 | 30103720  | 30131757  | transcribed_unproces | 2,75 | 0,5682268 |
| ENSG00000244619 | ENSG00000244619 | 1  | 145892847 | 145893483 | antisense            | 2,75 | 0,2746192 |
| ENSG00000278740 | ENSG00000278740 | 17 | 68188547  | 68189165  | lincRNA              | 2,74 | 2,0633527 |
| ENSG00000277299 | ENSG00000277299 | 12 | 109948389 | 109949029 | antisense            | 2,73 | 0,5865398 |
| ENSG00000264859 | DSG2-AS1        | 18 | 31542146  | 31556911  | antisense            | 2,73 | 0,4909563 |
| ENSG00000235010 | ENSG00000235010 | 10 | 132181225 | 132185962 | antisense            | 2,73 | 0,5682268 |
| ENSG00000235749 | ENSG00000235749 | 1  | 247639749 | 247747062 | antisense            | 2,73 | 1,1964007 |
| ENSG00000270269 | IMMP1LP1        | 11 | 63632233  | 63632720  | processed_pseudoger  | 2,72 | 1,5215308 |
| ENSG00000236008 | ENSG00000236008 | 2  | 8559833   | 8583792   | lincRNA              | 2,71 | 1,6498059 |
| ENSG00000236773 | ENSG00000236773 | 1  | 224175476 | 224175706 | processed_pseudoger  | 2,70 | 0,6526668 |

|                 |                 |    |           |           |                       |      |           |
|-----------------|-----------------|----|-----------|-----------|-----------------------|------|-----------|
| ENSG00000269564 | ENSG00000269564 | 19 | 53788782  | 53789168  | lincRNA               | 2,70 | 1,3038915 |
| ENSG00000266840 | ENSG00000266840 | 18 | 69704978  | 69724975  | antisense             | 2,70 | 0,8926569 |
| ENSG00000266952 | LINC01538       | 18 | 64213082  | 64260055  | lincRNA               | 2,70 | 1,8851183 |
| ENSG00000260338 | LINC01570       | 16 | 5601169   | 5616196   | antisense             | 2,70 | 0,4036702 |
| ENSG00000261727 | ENSG00000261727 | 16 | 32008438  | 32084785  | transcribed_processed | 2,70 | 1,3038915 |
| ENSG00000227659 | CLYBL-AS2       | 13 | 99690081  | 99690971  | antisense             | 2,70 | 0,8926569 |
| ENSG00000228074 | UBBP5           | 13 | 87219004  | 87219269  | processed_pseudogen   | 2,70 | 0,8926569 |
| ENSG00000237361 | TUSC8           | 13 | 44400250  | 44405984  | lincRNA               | 2,70 | 0,8926569 |
| ENSG00000257004 | ENSG00000257004 | 12 | 12668982  | 12685075  | lincRNA               | 2,70 | 0,8926569 |
| ENSG00000257292 | ENSG00000257292 | 12 | 38205098  | 38206009  | unprocessed_pseudogen | 2,70 | 0,8926569 |
| ENSG00000276667 | ENSG00000276667 | 9  | 19895800  | 19895973  | unprocessed_pseudogen | 2,70 | 0,8926569 |
| ENSG00000254286 | ENSG00000254286 | 8  | 126557875 | 126713415 | antisense             | 2,70 | 0,5865398 |
| ENSG00000231382 | NBPF21P         | 3  | 36616006  | 36637457  | unprocessed_pseudogen | 2,70 | 0,5865398 |
| ENSG00000231254 | PCED1CP         | 2  | 212832161 | 212832945 | processed_pseudogen   | 2,70 | 1,8851183 |
| ENSG00000203307 | ENSG00000203307 | 1  | 166081183 | 166087483 | antisense             | 2,70 | 1,3038915 |
| ENSG00000250321 | ENSG00000250321 | 4  | 342821    | 342962    | processed_pseudogen   | 2,70 | 1,5943798 |
| ENSG00000277077 | ENSG00000277077 | 13 | 21287634  | 21287828  | unprocessed_pseudogen | 2,69 | 0,8108966 |
| ENSG00000214533 | KRT18P33        | 2  | 65666695  | 65667737  | processed_pseudogen   | 2,69 | 1,4697798 |
| ENSG00000230176 | LINC01433       | 20 | 4193065   | 4195943   | antisense             | 2,69 | 0,8468482 |
| ENSG00000272143 | FGF14-AS2       | 13 | 102394630 | 102395703 | lincRNA               | 2,67 | 0,5682268 |
| ENSG00000235590 | GNAS-AS1        | 20 | 58818919  | 58850903  | antisense             | 2,67 | 1,547231  |
| ENSG00000261599 | HERC2P8         | 16 | 33094204  | 33129090  | transcribed_unproces  | 2,67 | 0,8926569 |
| ENSG00000226051 | ZNF503-AS1      | 10 | 75269819  | 75373500  | lincRNA               | 2,67 | 1,6498059 |
| ENSG00000258608 | DNAJC19P9       | 14 | 45290036  | 45290386  | processed_pseudogen   | 2,66 | 0,4332376 |
| ENSG00000248632 | ENSG00000248632 | 4  | 164968587 | 164970002 | processed_pseudogen   | 2,66 | 0,8468482 |
| ENSG00000267160 | ENSG00000267160 | 17 | 44673689  | 44676257  | antisense             | 2,66 | 1,1964007 |
| ENSG00000272678 | ENSG00000272678 | 3  | 123283593 | 123283983 | antisense             | 2,64 | 0,6526668 |
| ENSG00000259907 | ENSG00000259907 | 14 | 71181456  | 71182106  | lincRNA               | 2,64 | 1,1217155 |
| ENSG00000258895 | ENSG00000258895 | 15 | 94033658  | 94034177  | processed_pseudogen   | 2,64 | 0,1217903 |
| ENSG00000257285 | ENSG00000257285 | 14 | 22929609  | 22955562  | antisense             | 2,63 | 0,8926569 |
| ENSG00000233485 | ENSG00000233485 | 1  | 15326680  | 15343876  | antisense             | 2,62 | 1,5943798 |
| ENSG00000259498 | ENSG00000259498 | 15 | 63046034  | 63049387  | antisense             | 2,61 | 0,5865398 |
| ENSG00000237036 | ZEB1-AS1        | 10 | 31206278  | 31320447  | antisense             | 2,61 | 0,4036702 |
| ENSG00000186162 | CIDCEP          | 3  | 10014238  | 10026365  | transcribed_unproces  | 2,61 | 0,3565078 |
| ENSG00000224973 | LARGE-AS1       | 22 | 33725014  | 33750843  | processed_transcript  | 2,60 | 0,5865398 |
| ENSG00000235102 | ENSG00000235102 | 20 | 41331123  | 41331660  | processed_pseudogen   | 2,60 | 1,3038915 |
| ENSG00000266573 | ENSG00000266573 | 18 | 24725781  | 24929076  | lincRNA               | 2,60 | 1,3038915 |
| ENSG00000273388 | ENSG00000273388 | 17 | 10291820  | 10317926  | antisense             | 2,60 | 0,8926569 |
| ENSG00000243122 | ENSG00000243122 | 15 | 37490691  | 37491103  | processed_pseudogen   | 2,60 | 0,5865398 |
| ENSG00000260139 | CSPG4P13        | 15 | 77894684  | 77904674  | transcribed_unproces  | 2,60 | 1,8851183 |
| ENSG00000258804 | ENSG00000258804 | 14 | 86905778  | 86922755  | lincRNA               | 2,60 | 0,5865398 |
| ENSG00000257512 | ENSG00000257512 | 12 | 93314809  | 93315941  | transcribed_processed | 2,60 | 0,8926569 |
| ENSG00000231039 | ENSG00000231039 | 10 | 5234358   | 5263408   | lincRNA               | 2,60 | 0,8926569 |
| ENSG00000249917 | LINC00536       | 8  | 115950511 | 116325059 | lincRNA               | 2,60 | 0,8926569 |
| ENSG00000253432 | ENSG00000253432 | 8  | 139096305 | 139102830 | lincRNA               | 2,60 | 0,5865398 |
| ENSG00000254349 | MIR2052HG       | 8  | 74599775  | 74823313  | lincRNA               | 2,60 | 1,8851183 |
| ENSG00000239311 | ENSG00000239311 | 3  | 111466313 | 111497095 | lincRNA               | 2,60 | 1,3038915 |
| ENSG00000203897 | SPATA42         | 1  | 108857217 | 108858524 | antisense             | 2,60 | 1,8851183 |
| ENSG00000231512 | ENSG00000231512 | 1  | 243029512 | 243052252 | lincRNA               | 2,60 | 1,3038915 |
| ENSG00000236846 | ENSG00000236846 | 1  | 223144049 | 223144954 | lincRNA               | 2,60 | 1,3038915 |
| ENSG00000215162 | LINC00269       | X  | 69179557  | 69209924  | lincRNA               | 2,60 | 1,3038915 |
| ENSG00000230265 | ENSG00000230265 | X  | 26557675  | 26558330  | processed_pseudogen   | 2,60 | 1,8851183 |
| ENSG00000256594 | ENSG00000256594 | 12 | 9617284   | 9658412   | transcribed_unproces  | 2,59 | 0,4036702 |
| ENSG00000261033 | ENSG00000261033 | 17 | 20008051  | 20009234  | antisense             | 2,59 | 2,0846889 |
| ENSG00000259746 | HSPE1P3         | 15 | 90634725  | 90635033  | processed_pseudogen   | 2,58 | 1,6174211 |
| ENSG00000238072 | ENSG00000238072 | 7  | 129410113 | 129410370 | processed_pseudogen   | 2,58 | 0,7367804 |
| ENSG00000236333 | TRHDE-AS1       | 12 | 72253508  | 72274907  | processed_transcript  | 2,58 | 0,5682268 |
| ENSG00000249679 | ENSG00000249679 | 4  | 185471516 | 185472263 | antisense             | 2,56 | 1,6174211 |
| ENSG00000246889 | ENSG00000246889 | 11 | 70372246  | 70398488  | antisense             | 2,55 | 1,1217155 |



|                 |                 |    |           |           |                      |      |           |
|-----------------|-----------------|----|-----------|-----------|----------------------|------|-----------|
| ENSG00000266921 | ENSG00000266921 | 19 | 43996896  | 44002836  | antisense            | 2,55 | 0,2161218 |
| ENSG00000258736 | ENSG00000258736 | 14 | 104653548 | 104655787 | lincRNA              | 2,55 | 0,5502547 |
| ENSG00000184523 | PTGER4P2        | 9  | 62843919  | 62844170  | processed_pseudogen  | 2,55 | 0,512233  |
| ENSG00000251087 | ALG1L3P         | 4  | 9703754   | 9710812   | unprocessed_pseudog  | 2,55 | 1,6739638 |
| ENSG00000259726 | CSPG4P11        | 15 | 84186752  | 84197384  | unprocessed_pseudog  | 2,54 | 1,6739638 |
| ENSG00000106133 | NSUN5P2         | 7  | 72947581  | 72954790  | transcribed_unproces | 2,54 | 0,1187106 |
| ENSG00000231120 | BTF3P10         | 6  | 149977922 | 149978416 | processed_pseudogen  | 2,53 | 1,8851183 |
| ENSG00000273585 | ENSG00000273585 | 15 | 101613676 | 101614339 | lincRNA              | 2,53 | 0,512233  |
| ENSG00000259867 | ENSG00000259867 | 16 | 80155053  | 80563135  | antisense            | 2,53 | 0,8926569 |
| ENSG00000163364 | LINC01116       | 2  | 176629589 | 176637931 | lincRNA              | 2,53 | 0,7095968 |
| ENSG00000255539 | ENSG00000255539 | 11 | 70324871  | 70327209  | antisense            | 2,52 | 0,8926569 |
| ENSG00000237121 | PIEZO1P2        | 20 | 58740532  | 58783821  | unprocessed_pseudog  | 2,50 | 0,4036702 |
| ENSG00000268536 | ENSG00000268536 | 19 | 4785120   | 4791207   | lincRNA              | 2,50 | 0,8926569 |
| ENSG00000262339 | ENSG00000262339 | 17 | 82978525  | 82981738  | antisense            | 2,50 | 1,3038915 |
| ENSG00000261404 | ENSG00000261404 | 16 | 74054151  | 74296762  | lincRNA              | 2,50 | 0,7582127 |
| ENSG00000257325 | ENSG00000257325 | 12 | 100852331 | 100859262 | antisense            | 2,50 | 0,8926569 |
| ENSG00000254532 | ENSG00000254532 | 11 | 30044058  | 30084343  | lincRNA              | 2,50 | 0,8926569 |
| ENSG00000254619 | ENSG00000254619 | 11 | 33810145  | 33811178  | lincRNA              | 2,50 | 0,5865398 |
| ENSG00000227683 | ENSG00000227683 | 10 | 45164228  | 45181427  | lincRNA              | 2,50 | 1,3038915 |
| ENSG00000230945 | LINC01507       | 9  | 80030579  | 80034555  | lincRNA              | 2,50 | 0,8926569 |
| ENSG00000253290 | ENSG00000253290 | 8  | 27903229  | 27903495  | unprocessed_pseudog  | 2,50 | 1,3038915 |
| ENSG00000254007 | ENSG00000254007 | 8  | 5659679   | 5670077   | lincRNA              | 2,50 | 0,5865398 |
| ENSG00000254178 | ENSG00000254178 | 8  | 25834129  | 25840135  | lincRNA              | 2,50 | 1,8851183 |
| ENSG00000228680 | ENSG00000228680 | 7  | 43239066  | 43249268  | antisense            | 2,50 | 0,8926569 |
| ENSG00000249647 | C5orf66-AS2     | 5  | 135236234 | 135248179 | lincRNA              | 2,50 | 1,8851183 |
| ENSG00000251309 | ENSG00000251309 | 4  | 101976894 | 102036903 | antisense            | 2,50 | 1,8851183 |
| ENSG00000231054 | ENSG00000231054 | 2  | 45168583  | 45169414  | lincRNA              | 2,50 | 1,6174211 |
| ENSG00000238098 | ABCA17P         | 16 | 2339150   | 2426699   | unitary_pseudogene   | 2,50 | 0,3565078 |
| ENSG00000240591 | ENSG00000240591 | 22 | 31454251  | 31464204  | antisense            | 2,50 | 0,8926569 |
| ENSG00000267058 | ENSG00000267058 | 19 | 43891804  | 43901805  | lincRNA              | 2,49 | 0,1392851 |
| ENSG00000234297 | ENSG00000234297 | 9  | 15055057  | 15056052  | processed_pseudogen  | 2,48 | 1,1964007 |
| ENSG00000249353 | NPM1P27         | 5  | 93682838  | 93683667  | processed_pseudogen  | 2,48 | 0,4909563 |
| ENSG00000132967 | HMGB1P5         | 3  | 22381819  | 22382929  | transcribed processe | 2,48 | 1,0789438 |
| ENSG00000184100 | BRD7P2          | 3  | 160100850 | 160102793 | processed_pseudogen  | 2,47 | 0,6898868 |
| ENSG00000223756 | TSSC2           | 11 | 3380961   | 3408978   | transcribed_unproces | 2,47 | 1,6174211 |
| ENSG00000213140 | ELK2AP          | 14 | 105672308 | 105673314 | processed_pseudogen  | 2,45 | 1,2188867 |
| ENSG00000251603 | ENSG00000251603 | 4  | 151667224 | 151670502 | antisense            | 2,45 | 0,7582127 |
| ENSG00000246560 | ENSG00000246560 | 4  | 102828055 | 102844075 | antisense            | 2,45 | 0,512233  |
| ENSG00000228063 | LYPLAL1-AS1     | 1  | 219086602 | 219173961 | antisense            | 2,44 | 1,0510989 |
| ENSG00000259248 | USP3-AS1        | 15 | 63544247  | 63601589  | antisense            | 2,43 | 4,86E-02  |
| ENSG00000228407 | ENSG00000228407 | 1  | 52160261  | 52160600  | processed_pseudogen  | 2,43 | 0,512233  |
| ENSG00000236439 | ENSG00000236439 | 1  | 202471864 | 202472117 | processed_pseudogen  | 2,43 | 0,6526668 |
| ENSG00000276026 | ENSG00000276026 | 20 | 1117847   | 1118450   | antisense            | 2,43 | 0,8108966 |
| ENSG00000225308 | ASS1P11         | 7  | 21220213  | 21221428  | processed_pseudogen  | 2,42 | 1,0510989 |
| ENSG00000248787 | ENSG00000248787 | 3  | 125908005 | 125910272 | lincRNA              | 2,42 | 0,3565078 |
| ENSG00000273702 | ENSG00000273702 | 17 | 59618553  | 59619714  | lincRNA              | 2,41 | 1,8851183 |
| ENSG00000267811 | ENSG00000267811 | 11 | 62771120  | 62771606  | antisense            | 2,41 | 1,6174211 |
| ENSG00000233213 | KCNJ6-AS1       | 21 | 37717102  | 37719569  | sense_intronic       | 2,40 | 1,3038915 |
| ENSG00000225069 | ENSG00000225069 | 20 | 25099105  | 25099928  | processed_pseudogen  | 2,40 | 1,3038915 |
| ENSG00000225831 | RPS18P1         | 20 | 5532878   | 5533335   | processed_pseudogen  | 2,40 | 0,8926569 |
| ENSG00000264212 | ENSG00000264212 | 18 | 76256891  | 76258337  | lincRNA              | 2,40 | 1,8851183 |
| ENSG00000263571 | ENSG00000263571 | 17 | 34161737  | 34164251  | lincRNA              | 2,40 | 1,8851183 |
| ENSG00000261466 | ENSG00000261466 | 16 | 33548297  | 33554408  | lincRNA              | 2,40 | 1,8851183 |
| ENSG00000274367 | ENSG00000274367 | 16 | 2981175   | 2981591   | lincRNA              | 2,40 | 0,5865398 |
| ENSG00000258785 | LINC01580       | 15 | 93900701  | 93984150  | lincRNA              | 2,40 | 0,5865398 |
| ENSG00000259527 | LINC00052       | 15 | 87576929  | 87579866  | lincRNA              | 2,40 | 1,3038915 |
| ENSG00000281721 | LINC01080       | 13 | 80011077  | 80028283  | lincRNA              | 2,40 | 1,3038915 |
| ENSG00000255946 | ENSG00000255946 | 12 | 120740470 | 120761592 | antisense            | 2,40 | 1,8851183 |
| ENSG00000234170 | ENSG00000234170 | 10 | 2446253   | 2447352   | lincRNA              | 2,40 | 1,3038915 |

|                 |                 |   |    |           |           |                      |      |           |
|-----------------|-----------------|---|----|-----------|-----------|----------------------|------|-----------|
| ENSG00000212994 | RPS26P6         |   | 8  | 100895771 | 100896118 | processed_pseudogen  | 2,40 | 1,3038915 |
| ENSG00000251563 | IARS2P1         |   | 8  | 87598462  | 87601634  | processed_pseudogen  | 2,40 | 0,5865398 |
| ENSG00000253394 | LINC00534       |   | 8  | 90221488  | 90569318  | lincRNA              | 2,40 | 1,8851183 |
| ENSG00000281657 | LINC00976       |   | 8  | 128904773 | 128966001 | lincRNA              | 2,40 | 0,8926569 |
| ENSG00000224683 | RPL36AP29       |   | 7  | 16208945  | 16209265  | processed_pseudogen  | 2,40 | 0,5865398 |
| ENSG00000230190 | ENSG00000230190 |   | 7  | 147671711 | 147673143 | sense_intronic       | 2,40 | 1,8851183 |
| ENSG00000232053 | ENSG00000232053 |   | 7  | 136092925 | 136437426 | lincRNA              | 2,40 | 0,8926569 |
| ENSG00000234352 | ENSG00000234352 |   | 7  | 136685559 | 137182107 | antisense            | 2,40 | 0,8926569 |
| ENSG00000204661 | C5orf60         |   | 5  | 179641544 | 179645046 | processed_transcript | 2,40 | 1,8851183 |
| ENSG00000250634 | LINC01182       |   | 4  | 13655179  | 13977075  | lincRNA              | 2,40 | 0,5865398 |
| ENSG00000250997 | ENSG00000250997 |   | 4  | 160521829 | 160522311 | processed_pseudogen  | 2,40 | 1,8851183 |
| ENSG00000260519 | ENSG00000260519 |   | 4  | 42657496  | 42657928  | antisense            | 2,40 | 1,8851183 |
| ENSG00000214691 | ENSG00000214691 |   | 2  | 41877074  | 41894046  | lincRNA              | 2,40 | 0,5865398 |
| ENSG00000223929 | MIR4432HG       |   | 2  | 60359216  | 60391375  | lincRNA              | 2,40 | 0,8926569 |
| ENSG00000224638 | ENSG00000224638 |   | 2  | 173880865 | 173899428 | lincRNA              | 2,40 | 1,3038915 |
| ENSG00000236348 | PSMC1P10        |   | 2  | 17385091  | 17386417  | processed_pseudogen  | 2,40 | 0,8926569 |
| ENSG00000216866 | RPS2P55         | X |    | 40934982  | 40935864  | processed_pseudogen  | 2,40 | 1,6739638 |
| ENSG00000259370 | ENSG00000259370 |   | 15 | 62827675  | 62884034  | antisense            | 2,39 | 1,3038915 |
| ENSG00000267112 | ENSG00000267112 |   | 18 | 54885866  | 54898083  | antisense            | 2,39 | 1,4448456 |
| ENSG00000250983 | ENSG00000250983 |   | 3  | 133546071 | 133546272 | processed_pseudogen  | 2,38 | 1,5215308 |
| ENSG00000234477 | ENSG00000234477 |   | 17 | 40921430  | 40975926  | antisense            | 2,38 | 1,547231  |
| ENSG00000242759 | LINC00882       |   | 3  | 106836811 | 107240641 | lincRNA              | 2,38 | 1,5215308 |
| ENSG00000175886 | RPL7AP66        |   | 18 | 39334872  | 39335672  | processed_pseudogen  | 2,37 | 0,4332376 |
| ENSG00000254789 | ENSG00000254789 |   | 11 | 15572023  | 15622391  | lincRNA              | 2,36 | 1,6739638 |
| ENSG00000225721 | ENSG00000225721 |   | 1  | 44759037  | 44775810  | antisense            | 2,36 | 1,6498059 |
| ENSG00000257452 | ENSG00000257452 |   | 12 | 112907628 | 113017751 | antisense            | 2,36 | 0,7582127 |
| ENSG00000242258 | LINC00996       |   | 7  | 150433654 | 150448140 | lincRNA              | 2,36 | 1,0510989 |
| ENSG00000240057 | ENSG00000240057 |   | 3  | 113019532 | 113183301 | antisense            | 2,36 | 2,0633527 |
| ENSG00000225868 | ENSG00000225868 |   | 19 | 37823722  | 37855215  | lincRNA              | 2,35 | 0,7367804 |
| ENSG00000228620 | ENSG00000228620 |   | 22 | 38424288  | 38427336  | antisense            | 2,33 | 0,8926569 |
| ENSG00000254946 | ENSG00000254946 |   | 11 | 15552855  | 15591098  | lincRNA              | 2,33 | 1,4448456 |
| ENSG00000179101 | ENSG00000179101 | X |    | 123514473 | 123514872 | processed_pseudogen  | 2,33 | 1,5215308 |
| ENSG00000275765 | ENSG00000275765 |   | 5  | 151770242 | 151771508 | lincRNA              | 2,32 | 0,6898868 |
| ENSG00000254485 | ENSG00000254485 |   | 3  | 9292588   | 9363303   | antisense            | 2,32 | 1,2188867 |
| ENSG00000242391 | ENSG00000242391 |   | 1  | 52881216  | 52881730  | antisense            | 2,31 | 0,6309753 |
| ENSG00000245748 | ENSG00000245748 |   | 4  | 7030554   | 7046231   | antisense            | 2,30 | 0,1187106 |
| ENSG00000225083 | GTRP1-AS1       |   | 13 | 113351673 | 113361868 | antisense            | 2,30 | 1,6174211 |
| ENSG00000224141 | MIR548XHG       |   | 21 | 18561265  | 18760003  | lincRNA              | 2,30 | 0,8926569 |
| ENSG00000229005 | HNF4A-AS1       |   | 20 | 44372746  | 44395706  | antisense            | 2,30 | 1,8851183 |
| ENSG00000278816 | ENSG00000278816 |   | 20 | 5061037   | 5061340   | lincRNA              | 2,30 | 1,8851183 |
| ENSG00000259200 | ENSG00000259200 |   | 15 | 45705078  | 45931069  | lincRNA              | 2,30 | 0,5865398 |
| ENSG00000259672 | ENSG00000259672 |   | 15 | 63098870  | 63110403  | lincRNA              | 2,30 | 1,3038915 |
| ENSG00000232881 | RPS10P21        |   | 13 | 71913704  | 71914178  | processed_pseudogen  | 2,30 | 1,3038915 |
| ENSG00000254456 | ENSG00000254456 |   | 11 | 25734770  | 25781758  | lincRNA              | 2,30 | 0,5865398 |
| ENSG00000254037 | ENSG00000254037 |   | 8  | 119480279 | 119480775 | processed_pseudogen  | 2,30 | 1,3038915 |
| ENSG00000261437 | ENSG00000261437 |   | 8  | 94637285  | 94639467  | antisense            | 2,30 | 1,8851183 |
| ENSG00000225329 | LHFPL3-AS2      |   | 7  | 104894628 | 104926645 | processed_transcript | 2,30 | 0,5502547 |
| ENSG00000248430 | HMGB3P16        |   | 5  | 112452703 | 112452989 | processed_pseudogen  | 2,30 | 1,3038915 |
| ENSG00000250250 | ENSG00000250250 |   | 5  | 15602189  | 15607348  | antisense            | 2,30 | 1,8851183 |
| ENSG00000251206 | ENSG00000251206 |   | 5  | 67268022  | 67270182  | lincRNA              | 2,30 | 0,8926569 |
| ENSG00000230292 | NAALADL2-AS3    |   | 3  | 175079307 | 175115242 | processed_transcript | 2,30 | 1,8851183 |
| ENSG00000225982 | ENSG00000225982 |   | 1  | 182086551 | 182090112 | lincRNA              | 2,30 | 1,3038915 |
| ENSG00000259623 | ENSG00000259623 |   | 17 | 41848518  | 41851447  | sense_overlapping    | 2,30 | 1,6739638 |
| ENSG00000249684 | ENSG00000249684 |   | 5  | 177950335 | 177963960 | antisense            | 2,29 | 0,7582127 |
| ENSG00000267440 | ENSG00000267440 |   | 17 | 43680273  | 43705884  | lincRNA              | 2,27 | 1,547231  |
| ENSG00000205740 | ENSG00000205740 |   | 10 | 971146    | 988341    | processed_transcript | 2,26 | 2,007219  |
| ENSG00000239473 | RPL7P38         |   | 12 | 80028893  | 80029631  | processed_pseudogen  | 2,25 | 2,0846889 |
| ENSG00000215004 | MESTP4          |   | 3  | 29087396  | 29088599  | processed_pseudogen  | 2,25 | 2,0846889 |
| ENSG00000261872 | ENSG00000261872 |   | 17 | 47169826  | 47171049  | antisense            | 2,24 | 2,007219  |

|                 |                 |    |           |           |                       |      |           |
|-----------------|-----------------|----|-----------|-----------|-----------------------|------|-----------|
| ENSG00000271127 | ENSG00000271127 | 22 | 15796959  | 15798346  | sense_intronic        | 2,24 | 0,6309753 |
| ENSG00000277498 | ENSG00000277498 | 2  | 61858137  | 61860298  | unprocessed_pseudogen | 2,23 | 0,6526668 |
| ENSG00000173811 | CCDC13-AS1      | 3  | 42732575  | 42746768  | antisense             | 2,22 | 0,6898868 |
| ENSG00000247708 | STX18-AS1       | 4  | 4542131   | 4710938   | antisense             | 2,21 | 0,4909563 |
| ENSG00000233271 | ENSG00000233271 | 1  | 54980950  | 54992274  | antisense             | 2,21 | 1,6739638 |
| ENSG00000212802 | RPL15P3         | 6  | 12514110  | 12514724  | processed_pseudogen   | 2,21 | 0,5865398 |
| ENSG00000276354 | UPF3BP1         | X  | 119831616 | 119831759 | unprocessed_pseudogen | 2,21 | 0,8108966 |
| ENSG00000267083 | KRT18P61        | 17 | 60810165  | 60811462  | processed_pseudogen   | 2,20 | 1,3038915 |
| ENSG00000267667 | ENSG00000267667 | 17 | 61130704  | 61135964  | antisense             | 2,20 | 1,3038915 |
| ENSG00000260979 | ENSG00000260979 | 16 | 8962706   | 8966990   | lincRNA               | 2,20 | 1,3038915 |
| ENSG00000261439 | ENSG00000261439 | 16 | 56192614  | 56194518  | antisense             | 2,20 | 0,8926569 |
| ENSG00000258831 | ENSG00000258831 | 15 | 93882082  | 93886743  | lincRNA               | 2,20 | 1,3038915 |
| ENSG00000226903 | LINC00354       | 13 | 111899985 | 111901176 | lincRNA               | 2,20 | 0,8926569 |
| ENSG00000257191 | ENSG00000257191 | 12 | 78960258  | 79045644  | antisense             | 2,20 | 1,3038915 |
| ENSG00000255411 | ENSG00000255411 | 11 | 13785390  | 13848002  | lincRNA               | 2,20 | 0,8926569 |
| ENSG00000189275 | LINC01164       | 10 | 131772398 | 131790199 | lincRNA               | 2,20 | 1,8851183 |
| ENSG00000226762 | ENSG00000226762 | 10 | 3240371   | 3257210   | lincRNA               | 2,20 | 1,3038915 |
| ENSG00000233569 | ENSG00000233569 | 9  | 117648606 | 117657027 | lincRNA               | 2,20 | 0,5865398 |
| ENSG00000253684 | BUD31P1         | 8  | 33641581  | 33641939  | processed_pseudogen   | 2,20 | 1,8851183 |
| ENSG00000254100 | ENSG00000254100 | 8  | 38552248  | 38559020  | lincRNA               | 2,20 | 1,3038915 |
| ENSG00000224970 | ENSG00000224970 | 7  | 142875836 | 142892743 | antisense             | 2,20 | 1,8851183 |
| ENSG00000253183 | ENSG00000253183 | 7  | 139502453 | 139503812 | processed_pseudogen   | 2,20 | 0,8926569 |
| ENSG00000223786 | ENSG00000223786 | 6  | 74069451  | 74690727  | lincRNA               | 2,20 | 0,8926569 |
| ENSG00000233358 | ENSG00000233358 | 6  | 22744395  | 23031780  | lincRNA               | 2,20 | 1,3038915 |
| ENSG00000251026 | ENSG00000251026 | 5  | 104079911 | 104105403 | lincRNA               | 2,20 | 1,8851183 |
| ENSG00000249534 | LINC01258       | 4  | 38420662  | 38523180  | lincRNA               | 2,20 | 1,3038915 |
| ENSG00000205837 | LINC00487       | 2  | 6728177   | 6770311   | lincRNA               | 2,20 | 1,8851183 |
| ENSG00000228222 | ENSG00000228222 | 2  | 167293171 | 167558333 | lincRNA               | 2,20 | 1,3038915 |
| ENSG00000235495 | ENSG00000235495 | 2  | 67565604  | 67684077  | lincRNA               | 2,20 | 0,8926569 |
| ENSG00000233558 | ENSG00000233558 | 6  | 116258493 | 116259115 | processed_pseudogen   | 2,20 | 0,7095968 |
| ENSG00000234996 | ENSG00000234996 | 1  | 202861754 | 202875241 | transcribed_processed | 2,19 | 0,7095968 |
| ENSG00000262728 | ENSG00000262728 | 15 | 32586105  | 32615158  | antisense             | 2,18 | 1,1964007 |
| ENSG00000266614 | ENSG00000266614 | 18 | 76259166  | 76260114  | lincRNA               | 2,18 | 1,6498059 |
| ENSG00000234323 | ENSG00000234323 | 9  | 106278392 | 106604795 | lincRNA               | 2,18 | 1,1217155 |
| ENSG00000250994 | ENSG00000250994 | 5  | 134436711 | 134492519 | lincRNA               | 2,18 | 1,6498059 |
| ENSG00000267345 | ENSG00000267345 | 19 | 37075113  | 37078605  | antisense             | 2,18 | 2,007219  |
| ENSG00000272002 | ENSG00000272002 | 2  | 7260871   | 7261504   | lincRNA               | 2,18 | 1,3038915 |
| ENSG00000223911 | ENSG00000223911 | 2  | 147899401 | 147902956 | antisense             | 2,18 | 1,4697798 |
| ENSG00000272844 | ENSG00000272844 | 3  | 112990447 | 112991153 | antisense             | 2,17 | 1,0177863 |
| ENSG00000213104 | NPM1P46         | 2  | 197379701 | 197380892 | processed_pseudogen   | 2,17 | 0,8926569 |
| ENSG00000223576 | ENSG00000223576 | 13 | 19841827  | 19843672  | antisense             | 2,17 | 1,6739638 |
| ENSG00000232917 | HSPE1P6         | 1  | 203903723 | 203904013 | processed_pseudogen   | 2,16 | 1,4448456 |
| ENSG00000226478 | UPF3AP1         | 17 | 16745636  | 16746761  | processed_pseudogen   | 2,15 | 1,0789438 |
| ENSG00000203876 | ADD3-AS1        | 10 | 109940104 | 110008381 | processed_transcript  | 2,14 | 1,3038915 |
| ENSG00000227477 | STK4-AS1        | 20 | 44963794  | 44966402  | lincRNA               | 2,14 | 0,9880903 |
| ENSG00000278090 | ENSG00000278090 | 15 | 99028538  | 99031053  | lincRNA               | 2,13 | 1,1047191 |
| ENSG00000261762 | ENSG00000261762 | 15 | 78589123  | 78591276  | antisense             | 2,13 | 0,8468482 |
| ENSG00000272168 | CASC15          | 6  | 21664772  | 22214505  | lincRNA               | 2,13 | 0,512233  |
| ENSG00000204894 | ENSG00000204894 | 7  | 152367171 | 152367260 | processed_pseudogen   | 2,11 | 0,4909563 |
| ENSG00000237481 | ENSG00000237481 | 1  | 229319403 | 229323087 | antisense             | 2,10 | 1,1964007 |
| ENSG00000230107 | ENSG00000230107 | 22 | 42438023  | 42446195  | lincRNA               | 2,10 | 1,3038915 |
| ENSG00000278292 | RFPL4AP6        | 22 | 29432944  | 29435005  | unprocessed_pseudogen | 2,10 | 1,3038915 |
| ENSG00000222042 | ENSG00000222042 | 21 | 25169431  | 25333825  | lincRNA               | 2,10 | 1,3038915 |
| ENSG00000241054 | ENSG00000241054 | 20 | 20094401  | 20095684  | antisense             | 2,10 | 1,3038915 |
| ENSG00000265975 | ENSG00000265975 | 17 | 8967523   | 8976995   | lincRNA               | 2,10 | 0,7582127 |
| ENSG00000258455 | ENSG00000258455 | 14 | 55325834  | 55339501  | antisense             | 2,10 | 0,8926569 |
| ENSG00000258958 | ENSG00000258958 | 14 | 87323753  | 87332390  | lincRNA               | 2,10 | 1,8851183 |
| ENSG00000225760 | LINC00431       | 13 | 110983307 | 110990564 | lincRNA               | 2,10 | 1,3038915 |
| ENSG00000256699 | ENSG00000256699 | 12 | 129208601 | 129212662 | lincRNA               | 2,10 | 0,8926569 |

|                 |                 |    |           |           |                         |      |           |
|-----------------|-----------------|----|-----------|-----------|-------------------------|------|-----------|
| ENSG00000225208 | ENSG00000225208 | 10 | 101311018 | 101311505 | lincRNA                 | 2,10 | 0,8926569 |
| ENSG00000270727 | ENSG00000270727 | 10 | 20547171  | 20547422  | processed_pseudogen     | 2,10 | 1,3038915 |
| ENSG00000253983 | ENSG00000253983 | 8  | 74199396  | 74208441  | antisense               | 2,10 | 1,8851183 |
| ENSG00000254202 | ENSG00000254202 | 8  | 83912713  | 84140283  | lincRNA                 | 2,10 | 0,5865398 |
| ENSG00000254269 | ENSG00000254269 | 8  | 1104882   | 1262580   | processed_transcript    | 2,10 | 0,8926569 |
| ENSG00000280511 | ENSG00000280511 | 6  | 76561328  | 76562590  | lincRNA                 | 2,10 | 0,8926569 |
| ENSG00000227762 | GUSBP8          | 5  | 99532628  | 99534611  | unprocessed_pseudogen   | 2,10 | 1,3038915 |
| ENSG00000249400 | HMGB3P17        | 5  | 123468781 | 123469429 | processed_pseudogen     | 2,10 | 1,3038915 |
| ENSG00000251296 | ENSG00000251296 | 4  | 10167159  | 10167765  | processed_pseudogen     | 2,10 | 1,3038915 |
| ENSG00000273238 | ENSG00000273238 | 4  | 573880    | 574412    | lincRNA                 | 2,10 | 1,3038915 |
| ENSG00000186543 | CROCCP5         | 1  | 21434318  | 21437558  | unprocessed_pseudogen   | 2,10 | 0,8926569 |
| ENSG00000230817 | LINC01362       | 1  | 82903183  | 83166815  | lincRNA                 | 2,10 | 1,8851183 |
| ENSG00000229335 | DANT1           | X  | 115840964 | 115843050 | antisense               | 2,10 | 1,8851183 |
| ENSG00000261723 | ENSG00000261723 | 16 | 23605841  | 23624107  | antisense               | 2,09 | 1,5215308 |
| ENSG00000267677 | ENSG00000267677 | 18 | 59360700  | 59386749  | lincRNA                 | 2,09 | 1,2188867 |
| ENSG00000260862 | ENSG00000260862 | 16 | 82773319  | 82829638  | sense_intronic          | 2,09 | 0,8108966 |
| ENSG00000229893 | ENSG00000229893 | 7  | 27733064  | 27740395  | antisense               | 2,08 | 1,547231  |
| ENSG00000236801 | RPL24P8         | 9  | 70217195  | 70217668  | processed_pseudogen     | 2,08 | 0,7095968 |
| ENSG00000268412 | TRMT112P6       | 2  | 26028208  | 26028612  | processed_pseudogen     | 2,07 | 0,3565078 |
| ENSG00000235381 | ENSG00000235381 | 6  | 155253139 | 155256724 | antisense               | 2,07 | 0,9880903 |
| ENSG00000229887 | HNRNPA1P6       | 1  | 58047889  | 58049335  | transcribed_unprocessed | 2,07 | 1,6739638 |
| ENSG00000231607 | DLEU2           | 13 | 49982552  | 50125720  | antisense               | 2,07 | 1,3038915 |
| ENSG00000236266 | ENSG00000236266 | 1  | 7810242   | 7827342   | antisense               | 2,07 | 0,8468482 |
| ENSG00000255090 | MIR100HG        | 11 | 122155422 | 122422871 | lincRNA                 | 2,06 | 0,7582127 |
| ENSG00000262468 | LINC01569       | 16 | 4245825   | 4253789   | lincRNA                 | 2,06 | 1,5943798 |
| ENSG00000265688 | MAFG-AS1        | 17 | 81927829  | 81930753  | antisense               | 2,06 | 1,5215308 |
| ENSG00000204758 | ENSG00000204758 | 5  | 172954786 | 172959392 | antisense               | 2,05 | 1,2188867 |
| ENSG00000263563 | UBBP4           | 17 | 22202995  | 22205154  | transcribed_unprocessed | 2,05 | 0,4036702 |
| ENSG00000253516 | HMGB1P41        | 8  | 80812142  | 80812581  | processed_pseudogen     | 2,04 | 1,6739638 |
| ENSG00000213261 | EEF1B2P6        | 7  | 131661952 | 131662624 | processed_pseudogen     | 2,04 | 1,4697798 |
| ENSG00000232709 | MARK2P9         | 10 | 92418667  | 92420875  | processed_pseudogen     | 2,03 | 1,8851183 |
| ENSG00000227620 | ALG1L8P         | 11 | 67785273  | 67792335  | unprocessed_pseudogen   | 2,03 | 1,6174211 |
| ENSG00000254418 | ENSG00000254418 | 11 | 14262846  | 14273691  | antisense               | 2,03 | 1,0789438 |
| ENSG00000219682 | ENSG00000219682 | 6  | 25140003  | 25141403  | processed_pseudogen     | 2,02 | 0,4909563 |
| ENSG00000250405 | ENSG00000250405 | 5  | 130994253 | 130996164 | processed_pseudogen     | 2,01 | 1,0789438 |
| ENSG00000235241 | ENSG00000235241 | 1  | 16889095  | 16889602  | processed_pseudogen     | 2,01 | 1,4448456 |
| ENSG00000249858 | SNX5P1          | 4  | 76344550  | 76345590  | processed_pseudogen     | 2,00 | 0,512233  |
| ENSG00000233393 | ENSG00000233393 | 21 | 36104881  | 36109690  | lincRNA                 | 2,00 | 0,8926569 |
| ENSG00000269316 | ENSG00000269316 | 19 | 22609606  | 22610601  | processed_pseudogen     | 2,00 | 0,8926569 |
| ENSG00000265101 | ENSG00000265101 | 18 | 78925064  | 78927441  | lincRNA                 | 2,00 | 1,3038915 |
| ENSG00000277310 | ENSG00000277310 | 18 | 50256036  | 50256461  | sense_intronic          | 2,00 | 1,4448456 |
| ENSG00000266126 | ENSG00000266126 | 17 | 19929372  | 19929737  | sense_intronic          | 2,00 | 1,1217155 |
| ENSG00000257180 | ENSG00000257180 | 16 | 6056975   | 6092954   | sense_intronic          | 2,00 | 1,8851183 |
| ENSG00000260643 | ENSG00000260643 | 16 | 81053665  | 81087651  | processed_transcript    | 2,00 | 1,6174211 |
| ENSG00000276822 | ENSG00000276822 | 16 | 74393076  | 74393183  | unprocessed_pseudogen   | 2,00 | 0,5865398 |
| ENSG00000278716 | ENSG00000278716 | 16 | 85489813  | 85490831  | lincRNA                 | 2,00 | 1,3038915 |
| ENSG00000259485 | ENSG00000259485 | 15 | 97295881  | 97432094  | lincRNA                 | 2,00 | 1,3038915 |
| ENSG00000259671 | MTCYBP23        | 15 | 58154960  | 58156061  | processed_pseudogen     | 2,00 | 1,2188867 |
| ENSG00000259692 | ENSG00000259692 | 15 | 81660482  | 81871125  | lincRNA                 | 2,00 | 0,8468482 |
| ENSG00000259035 | ENSG00000259035 | 14 | 81741002  | 82030349  | lincRNA                 | 2,00 | 0,8926569 |
| ENSG00000224419 | KRT18P27        | 13 | 90230384  | 90231682  | processed_pseudogen     | 2,00 | 1,3038915 |
| ENSG00000226317 | LINC00351       | 13 | 85363601  | 85544570  | lincRNA                 | 2,00 | 1,8851183 |
| ENSG00000277227 | ENSG00000277227 | 13 | 28778224  | 28778448  | unprocessed_pseudogen   | 2,00 | 1,3038915 |
| ENSG00000256442 | ENSG00000256442 | 12 | 9647014   | 9648009   | antisense               | 2,00 | 0,5865398 |
| ENSG00000258279 | LINC00592       | 12 | 52210930  | 52223804  | lincRNA                 | 2,00 | 0,8926569 |
| ENSG00000198217 | OR51H2P         | 11 | 4876557   | 4877462   | unprocessed_pseudogen   | 2,00 | 1,8851183 |
| ENSG00000205494 | OR52A4P         | 11 | 5120621   | 5124513   | transcribed_unprocessed | 2,00 | 1,8851183 |
| ENSG00000223581 | ENSG00000223581 | 10 | 7097152   | 7097675   | lincRNA                 | 2,00 | 0,8926569 |
| ENSG00000225768 | ENSG00000225768 | 10 | 104474939 | 104480274 | lincRNA                 | 2,00 | 1,3038915 |

|                 |                 |   |           |           |                       |      |           |
|-----------------|-----------------|---|-----------|-----------|-----------------------|------|-----------|
| ENSG00000225639 | PGAM1P2         | 9 | 35943210  | 35943934  | processed_pseudogen   | 2,00 | 1,8851183 |
| ENSG00000237548 | TTLL11-IT1      | 9 | 121884636 | 121963719 | lincRNA               | 2,00 | 1,3038915 |
| ENSG00000253728 | ENSG00000253728 | 8 | 142834138 | 142834940 | antisense             | 2,00 | 1,8851183 |
| ENSG00000228334 | ENSG00000228334 | 7 | 3083252   | 3086421   | lincRNA               | 2,00 | 0,8926569 |
| ENSG00000220212 | OR4F1P          | 6 | 105919    | 106856    | unprocessed_pseudogen | 2,00 | 0,8926569 |
| ENSG00000227131 | ENSG00000227131 | 6 | 40271566  | 40276237  | lincRNA               | 2,00 | 0,8926569 |
| ENSG00000236336 | ENSG00000236336 | 6 | 4774526   | 4775408   | antisense             | 2,00 | 1,8851183 |
| ENSG00000213433 | RPLP1P6         | 5 | 151765859 | 151766378 | transcribed_processed | 2,00 | 1,6174211 |
| ENSG00000272139 | ENSG00000272139 | 5 | 122311297 | 122311673 | antisense             | 2,00 | 0,5865398 |
| ENSG00000173966 | ENSG00000173966 | 4 | 53575713  | 53576387  | processed_pseudogen   | 2,00 | 1,8851183 |
| ENSG00000228919 | ENSG00000228919 | 4 | 7939001   | 7940296   | lincRNA               | 2,00 | 1,4697798 |
| ENSG00000246095 | LINC01096       | 4 | 13546075  | 13547801  | lincRNA               | 2,00 | 1,8851183 |
| ENSG00000248749 | ENSG00000248749 | 4 | 84371393  | 84380189  | lincRNA               | 2,00 | 1,3038915 |
| ENSG00000249752 | ENSG00000249752 | 4 | 149027445 | 149062522 | lincRNA               | 2,00 | 1,8851183 |
| ENSG00000249993 | BFSP2-AS1       | 3 | 133429269 | 133455776 | antisense             | 2,00 | 0,5865398 |
| ENSG00000271893 | ENSG00000271893 | 2 | 195451778 | 195515699 | lincRNA               | 2,00 | 1,3038915 |
| ENSG00000260021 | ENSG00000260021 | 1 | 202810238 | 202810829 | antisense             | 2,00 | 1,6739638 |
| ENSG00000261060 | ENSG00000261060 | 1 | 179590372 | 179591305 | sense_overlapping     | 2,00 | 1,3038915 |

Supplementary Table S4: List of the 6,236 lncRNAs upregulated in cumulus granulosa cells

| Gene ID         | Gene Name       | Chrom | Start_position | End_position | Gene_biotype                       | Fold Change | q-value(%) |
|-----------------|-----------------|-------|----------------|--------------|------------------------------------|-------------|------------|
| ENSG00000245532 | NEAT1           | 11    | 65422774       | 65445540     | lincRNA                            | 18882,70    | 0          |
| ENSG00000242396 | ENSG00000242396 | 1     | 54886875       | 54888001     | antisense                          | 13618,82    | 0          |
| ENSG00000231991 | ANXA2P2         | 9     | 33624274       | 33625293     | processed_pseudogene               | 12551,54    | 0          |
| ENSG00000229807 | XIST            | X     | 73820651       | 73852753     | lincRNA                            | 9253,80     | 0          |
| ENSG00000270641 | TSIX            | X     | 73792205       | 73829231     | lincRNA                            | 6409,10     | 0          |
| ENSG00000229124 | VIM-AS1         | 10    | 17214239       | 17229985     | antisense                          | 6248,93     | 0          |
| ENSG00000214548 | MEG3            | 14    | 100779410      | 100861031    | lincRNA                            | 5217,70     | 0          |
| ENSG00000130600 | H19             | 11    | 1995163        | 2001470      | processed_transcript               | 4333,60     | 0          |
| ENSG00000260032 | LINC00657       | 20    | 36045622       | 36050960     | lincRNA                            | 3387,08     | 0          |
| ENSG00000272540 | ENSG00000272540 | 6     | 30723105       | 30723877     | antisense                          | 3200,00     | 0          |
| ENSG00000261821 | ENSG00000261821 | 15    | 74365435       | 74371211     | antisense                          | 2756,90     | 0          |
| ENSG00000266962 | ENSG00000266962 | 17    | 42552436       | 42554748     | antisense                          | 2612,70     | 0          |
| ENSG00000223749 | MIR503HG        | X     | 134543337      | 134546632    | lincRNA                            | 2429,80     | 0          |
| ENSG00000226549 | SCDP1           | 17    | 20784645       | 20785725     | processed_pseudogene               | 2114,10     | 0          |
| ENSG00000213846 | ENSG00000213846 | 3     | 27632976       | 27635427     | transcribed_processed_pseudogene   | 2022,70     | 0          |
| ENSG00000244953 | ENSG00000244953 | 11    | 43943787       | 43947206     | lincRNA                            | 1982,30     | 0          |
| ENSG00000214455 | RCN1P2          | 13    | 45390353       | 45391267     | processed_pseudogene               | 1977,10     | 0          |
| ENSG00000227766 | HCG4P5          | 6     | 29942075       | 29943067     | unprocessed_pseudogene             | 1912,30     | 0          |
| ENSG00000249835 | VCAN-AS1        | 5     | 83531352       | 83581320     | antisense                          | 1847,28     | 0          |
| ENSG00000227018 | IL6STP1         | 17    | 15783288       | 15784307     | processed_pseudogene               | 1786,40     | 0          |
| ENSG00000254332 | ENSG00000254332 | 8     | 69129598       | 69130345     | processed_pseudogene               | 1772,50     | 0          |
| ENSG00000262769 | ENSG00000262769 | 17    | 19560111       | 19597922     | antisense                          | 1767,90     | 0          |
| ENSG00000245067 | IGFBP7-AS1      | 4     | 57109762       | 57205510     | antisense                          | 1755,30     | 0          |
| ENSG00000254667 | ENSG00000254667 | 11    | 123430737      | 123435710    | transcribed_unprocessed_pseudogene | 1689,40     | 0          |
| ENSG00000256040 | PAPPA-AS1       | 9     | 116398157      | 116400606    | antisense                          | 1641,45     | 0          |
| ENSG00000234961 | ENSG00000234961 | 10    | 17233325       | 17234833     | antisense                          | 1617,14     | 0          |
| ENSG00000266283 | ENSG00000266283 | 18    | 22200619       | 22205229     | antisense                          | 1541,40     | 0          |
| ENSG00000248429 | ENSG00000248429 | 4     | 158170752      | 158202877    | antisense                          | 1497,70     | 0          |
| ENSG00000204949 | FAM83A-AS1      | 8     | 123201172      | 123202743    | antisense                          | 1250,64     | 0          |
| ENSG00000256013 | ENSG00000256013 | 16    | 10529440       | 10532082     | antisense                          | 1104,40     | 0          |
| ENSG00000225855 | RUSC1-AS1       | 1     | 155316863      | 155324176    | antisense                          | 1076,98     | 0          |
| ENSG00000214266 | STARP1          | 13    | 65309855       | 65310953     | processed_pseudogene               | 1056,60     | 0          |
| ENSG00000259172 | ENSG00000259172 | 15    | 101295419      | 101305737    | antisense                          | 1034,91     | 0          |
| ENSG00000249035 | ENSG00000249035 | 5     | 151676945      | 151724782    | antisense                          | 1007,30     | 0          |
| ENSG00000267259 | ENSG00000267259 | 17    | 28232590       | 28235281     | lincRNA                            | 1002,50     | 0          |
| ENSG00000266010 | GATA6-AS1       | 18    | 22166898       | 22168968     | lincRNA                            | 987,10      | 0          |
| ENSG00000226243 | RPL37AP1        | 20    | 44466564       | 44466842     | processed_pseudogene               | 983,70      | 0,2161218  |
| ENSG00000259884 | ENSG00000259884 | 12    | 52058459       | 52059503     | lincRNA                            | 937,91      | 0          |
| ENSG00000274177 | ENSG00000274177 | 19    | 1010221        | 1010907      | antisense                          | 928,10      | 0          |
| ENSG00000257453 | ENSG00000257453 | 12    | 76030494       | 76031378     | antisense                          | 922,38      | 0          |
| ENSG00000267469 | ENSG00000267469 | 19    | 3052910        | 3053724      | antisense                          | 900,45      | 0          |
| ENSG00000260290 | ENSG00000260290 | 16    | 69756536       | 69757937     | processed_pseudogene               | 844,46      | 0          |
| ENSG00000238258 | ENSG00000238258 | 10    | 33211277       | 33213804     | antisense                          | 812,30      | 0          |
| ENSG00000259279 | ENSG00000259279 | 15    | 39593580       | 39594231     | antisense                          | 792,10      | 0          |
| ENSG00000232814 | COL4A2-AS1      | 13    | 110502575      | 110508179    | antisense                          | 783,70      | 0          |
| ENSG00000232320 | ENSG00000232320 | 2     | 161340816      | 161341326    | processed_pseudogene               | 774,64      | 0          |
| ENSG00000127589 | TUBBP1          | 8     | 30351873       | 30353518     | transcribed_processed_pseudogene   | 768,00      | 0          |
| ENSG00000233588 | CYP51A1P2       | 13    | 28722386       | 28724021     | processed_pseudogene               | 765,00      | 0          |
| ENSG00000278621 | ENSG00000278621 | 15    | 39588357       | 39588882     | antisense                          | 759,70      | 0          |
| ENSG00000261026 | ENSG00000261026 | 8     | 22679013       | 22684009     | sense_overlapping                  | 744,60      | 0          |
| ENSG00000271581 | ENSG00000271581 | 6     | 31356647       | 31357637     | unprocessed_pseudogene             | 741,40      | 0          |
| ENSG00000265168 | ENSG00000265168 | 17    | 28573117       | 28574243     | antisense                          | 740,30      | 0          |
| ENSG00000206417 | H1FX-AS1        | 3     | 129315392      | 129326225    | antisense                          | 711,30      | 0          |

|                 |                 |    |           |           |                                        |        |   |
|-----------------|-----------------|----|-----------|-----------|----------------------------------------|--------|---|
| ENSG00000248187 | ENSG00000248187 | 4  | 128567972 | 128570531 | lincRNA                                | 710,00 | 0 |
| ENSG00000243701 | DUBR            | 3  | 107240692 | 107326964 | lincRNA                                | 666,00 | 0 |
| ENSG00000185275 | CD24P4          | X  | 18992467  | 18992709  | processed_pseudogene                   | 653,00 | 0 |
| ENSG00000251562 | MALAT1          | 11 | 65497762  | 65506516  | lincRNA                                | 651,73 | 0 |
| ENSG00000258727 | ENSG00000258727 | 14 | 23561097  | 23568073  | antisense                              | 634,62 | 0 |
| ENSG00000251593 | MSNP1           | 5  | 25909503  | 25911234  | processed_pseudogene                   | 617,50 | 0 |
| ENSG00000236654 | ENSG00000236654 | 7  | 23480753  | 23480959  | processed_pseudogene                   | 595,22 | 0 |
| ENSG00000213684 | LDHBP2          | X  | 76334841  | 76335845  | processed_pseudogene                   | 583,30 | 0 |
| ENSG00000262211 | ENSG00000262211 | 5  | 55936143  | 55941727  | antisense                              | 577,97 | 0 |
| ENSG00000213406 | ANXA2P1         | 4  | 153307792 | 153308717 | processed_pseudogene                   | 575,50 | 0 |
| ENSG00000133519 | ZDHHC8P1        | 22 | 23390606  | 23402726  | transcribed_unprocess<br>ed_pseudogene | 575,20 | 0 |
| ENSG00000180139 | ACTA2-AS1       | 10 | 88932390  | 88940820  | antisense                              | 574,65 | 0 |
| ENSG00000223949 | ROR1-AS1        | 1  | 64094442  | 64171297  | antisense                              | 564,20 | 0 |
| ENSG00000213763 | ACTBP2          | 5  | 77784881  | 77786003  | processed_pseudogene                   | 561,75 | 0 |
| ENSG00000259479 | SORD2P          | 15 | 44825747  | 44884694  | transcribed_unprocess<br>ed_pseudogene | 555,80 | 0 |
| ENSG00000232133 | IMPDH1P10       | 2  | 201137516 | 201140027 | processed_pseudogene                   | 555,80 | 0 |
| ENSG00000214297 | ALDOAP2         | 10 | 125666875 | 125667950 | processed_pseudogene                   | 552,30 | 0 |
| ENSG00000235847 | LDHAP7          | 2  | 84777259  | 84778223  | processed_pseudogene                   | 536,09 | 0 |
| ENSG00000255252 | ENSG00000255252 | 11 | 32097143  | 32105091  | antisense                              | 535,00 | 0 |
| ENSG00000259917 | HNRNPLP2        | 15 | 34489002  | 34490571  | unprocessed_pseudoge<br>ne             | 511,92 | 0 |
| ENSG00000272234 | ENSG00000272234 | 5  | 42806394  | 42806997  | antisense                              | 508,80 | 0 |
| ENSG00000259583 | ENSG00000259583 | 15 | 100892859 | 100919283 | antisense                              | 505,50 | 0 |
| ENSG00000204261 | PSMB8-AS1       | 6  | 32844086  | 32846495  | lincRNA                                | 504,50 | 0 |
| ENSG00000250508 | ENSG00000250508 | 11 | 68870664  | 68874542  | lincRNA                                | 498,60 | 0 |
| ENSG00000257378 | ENSG00000257378 | 12 | 49954639  | 49956125  | antisense                              | 493,20 | 0 |
| ENSG00000236480 | PKMP1           | 1  | 114535995 | 114537840 | processed_pseudogene                   | 488,64 | 0 |
| ENSG00000259352 | ENSG00000259352 | 15 | 45073492  | 45074048  | antisense                              | 487,70 | 0 |
| ENSG00000234645 | YWHAEP5         | 2  | 138288029 | 138288793 | processed_pseudogene                   | 487,58 | 0 |
| ENSG00000236136 | ADORA2BP1       | 1  | 209744373 | 209745214 | processed_pseudogene                   | 482,40 | 0 |
| ENSG00000244161 | FLNB-AS1        | 3  | 58162547  | 58170636  | antisense                              | 476,88 | 0 |
| ENSG00000232220 | ENSG00000232220 | 19 | 53874626  | 53876049  | antisense                              | 473,79 | 0 |
| ENSG00000260412 | ENSG00000260412 | 9  | 27937617  | 27944497  | sense_overlapping                      | 447,59 | 0 |
| ENSG00000259205 | PRKXP1          | 15 | 100553529 | 100558954 | processed_pseudogene                   | 443,00 | 0 |
| ENSG00000203858 | HSD3BP2         | 1  | 119439001 | 119446086 | unprocessed_pseudoge<br>ne             | 440,20 | 0 |
| ENSG00000263424 | ENSG00000263424 | 18 | 67506589  | 67514030  | antisense                              | 438,30 | 0 |
| ENSG00000233355 | CHRM3-AS2       | 1  | 239703381 | 239730465 | antisense                              | 435,70 | 0 |
| ENSG00000274415 | ENSG00000274415 | 1  | 147757185 | 147758434 | antisense                              | 432,91 | 0 |
| ENSG00000231313 | CLIC1P1         | 12 | 120914400 | 120915123 | processed_pseudogene                   | 431,09 | 0 |
| ENSG00000220785 | MTMR9LP         | 1  | 32231658  | 32241620  | transcribed_unprocess<br>ed_pseudogene | 428,10 | 0 |
| ENSG00000256364 | ENSG00000256364 | 12 | 120697124 | 120699541 | antisense                              | 415,15 | 0 |
| ENSG00000230149 | ENSG00000230149 | 22 | 38734730  | 38738990  | antisense                              | 408,00 | 0 |
| ENSG00000254635 | WAC-AS1         | 10 | 28522652  | 28532743  | antisense                              | 404,80 | 0 |
| ENSG00000225450 | ENSG00000225450 | 22 | 38739003  | 38749041  | antisense                              | 404,00 | 0 |
| ENSG00000241095 | CYP51A1P1       | 3  | 82806515  | 82808021  | processed_pseudogene                   | 397,69 | 0 |
| ENSG00000248445 | SEMA6A-AS1      | 5  | 116447547 | 116508276 | antisense                              | 389,10 | 0 |
| ENSG00000213942 | ENSG00000213942 | 12 | 6409637   | 6410013   | processed_pseudogene                   | 387,64 | 0 |
| ENSG00000232187 | FTH1P7          | 13 | 22696023  | 22696574  | processed_pseudogene                   | 379,48 | 0 |
| ENSG00000225462 | FDPSP1          | 1  | 187563061 | 187564131 | processed_pseudogene                   | 377,60 | 0 |
| ENSG00000272273 | ENSG00000272273 | 6  | 30742929  | 30743592  | antisense                              | 375,06 | 0 |
| ENSG00000206341 | HLA-H           | 6  | 29887752  | 29890482  | unprocessed_pseudoge<br>ne             | 371,90 | 0 |
| ENSG00000244151 | ENSG00000244151 | 7  | 151074742 | 151076530 | antisense                              | 358,67 | 0 |
| ENSG00000254545 | ENSG00000254545 | 1  | 31789130  | 31791322  | antisense                              | 356,82 | 0 |
| ENSG00000247095 | MIR210HG        | 11 | 565660    | 568457    | lincRNA                                | 353,10 | 0 |
| ENSG00000215861 | ENSG00000215861 | 1  | 149197992 | 149321732 | unprocessed_pseudoge<br>ne             | 352,20 | 0 |

|                 |                 |    |           |           |                                        |        |          |
|-----------------|-----------------|----|-----------|-----------|----------------------------------------|--------|----------|
| ENSG00000235910 | APOA1-AS        | 11 | 116836117 | 116855729 | antisense                              | 351,57 | 0        |
| ENSG00000224721 | ENSG00000224721 | 14 | 75574888  | 75579588  | antisense                              | 347,80 | 0        |
| ENSG00000271216 | LINC01050       | 13 | 42810366  | 42812562  | lincRNA                                | 344,90 | 0        |
| ENSG00000231625 | ENSG00000231625 | 17 | 19615789  | 19633825  | transcribed_unprocess<br>ed_pseudogene | 343,70 | 0        |
| ENSG00000213574 | LDHAP5          | 10 | 118932674 | 118933295 | processed_pseudogene                   | 340,17 | 0        |
| ENSG00000259049 | ENSG00000259049 | 14 | 52775237  | 52777740  | antisense                              | 338,08 | 0        |
| ENSG00000235191 | NUCB1-AS1       | 19 | 48910930  | 48918891  | antisense                              | 335,00 | 0        |
| ENSG00000256913 | ENSG00000256913 | 12 | 6477714   | 6480207   | processed_pseudogene                   | 333,70 | 0        |
| ENSG00000205885 | C1RL-AS1        | 12 | 7108052   | 7122501   | antisense                              | 333,30 | 0        |
| ENSG00000250859 | HNRNP KP1       | 5  | 127511464 | 127512842 | processed_pseudogene                   | 325,80 | 0        |
| ENSG00000260565 | ENSG00000260565 | 16 | 2660349   | 2673444   | processed_transcript                   | 320,10 | 0        |
| ENSG00000233111 | RAB1C           | 9  | 37636688  | 37637293  | processed_pseudogene                   | 319,80 | 0        |
| ENSG00000224063 | ENSG00000224063 | 2  | 187003220 | 187554663 | antisense                              | 317,17 | 0        |
| ENSG00000216285 | ENSG00000216285 | 12 | 104030779 | 104031543 | processed_pseudogene                   | 311,29 | 0        |
| ENSG00000255737 | AGAP2-AS1       | 12 | 57726271  | 57728356  | antisense                              | 309,30 | 0        |
| ENSG00000213222 | ENSG00000213222 | 2  | 131723253 | 131724279 | processed_pseudogene                   | 308,20 | 0        |
| ENSG00000261461 | UBE2MP1         | 16 | 35169692  | 35170241  | processed_pseudogene                   | 302,64 | 0        |
| ENSG00000272734 | ADIRF-AS1       | 10 | 86965345  | 86971311  | processed_transcript                   | 300,80 | 0        |
| ENSG00000268220 | ENSG00000268220 | 3  | 170087810 | 170089590 | antisense                              | 297,90 | 0        |
| ENSG00000271122 | ENSG00000271122 | 7  | 35695214  | 35699413  | antisense                              | 297,50 | 0        |
| ENSG00000253125 | ENSG00000253125 | 8  | 22690150  | 22798616  | processed_transcript                   | 297,30 | 0        |
| ENSG00000254416 | ENSG00000254416 | 11 | 110355130 | 110406400 | lincRNA                                | 293,70 | 0        |
| ENSG00000258663 | ENSG00000258663 | 14 | 100834432 | 100861026 | antisense                              | 293,40 | 0        |
| ENSG00000204054 | LINC00963       | 9  | 129483451 | 129513683 | processed_transcript                   | 292,27 | 0        |
| ENSG00000268189 | ENSG00000268189 | 19 | 15379076  | 15381194  | processed_transcript                   | 291,33 | 0        |
| ENSG00000215039 | CD27-AS1        | 12 | 6439001   | 6451567   | processed_transcript                   | 287,40 | 0        |
| ENSG00000224821 | COL4A2-AS2      | 13 | 110456396 | 110463287 | antisense                              | 286,10 | 0        |
| ENSG00000224596 | ZMIZ1-AS1       | 10 | 78943328  | 79067895  | antisense                              | 284,60 | 0        |
| ENSG00000268069 | ENSG00000268069 | 12 | 47784923  | 47786002  | antisense                              | 283,30 | 0        |
| ENSG00000230581 | ACTG1P14        | 9  | 6834456   | 6835577   | processed_pseudogene                   | 283,30 | 0        |
| ENSG00000255478 | ENSG00000255478 | 11 | 65367438  | 65375299  | antisense                              | 281,50 | 0        |
| ENSG00000230097 | ME2P1           | 9  | 29824742  | 29826711  | processed_pseudogene                   | 281,10 | 0        |
| ENSG00000256482 | ENSG00000256482 | 12 | 24830421  | 24836558  | antisense                              | 280,80 | 0        |
| ENSG00000235016 | SEMA3F-AS1      | 3  | 50116022  | 50156085  | antisense                              | 280,09 | 0        |
| ENSG00000214110 | LDHAP4          | 9  | 14921337  | 14922334  | processed_pseudogene                   | 278,60 | 0        |
| ENSG00000250746 | ENSG00000250746 | 4  | 164188311 | 164190367 | processed_pseudogene                   | 278,30 | 0        |
| ENSG00000267519 | ENSG00000267519 | 19 | 13834516  | 13836289  | lincRNA                                | 276,60 | 0        |
| ENSG00000270362 | HMG N3-AS1      | 6  | 79233718  | 79236797  | antisense                              | 275,60 | 0        |
| ENSG00000225511 | LINC00475       | 9  | 92141298  | 92160114  | lincRNA                                | 274,20 | 0        |
| ENSG00000233668 | ENSG00000233668 | 9  | 34223984  | 34224628  | processed_pseudogene                   | 272,80 | 1,40E-02 |
| ENSG00000259976 | ENSG00000259976 | 3  | 114314501 | 114316179 | lincRNA                                | 271,70 | 0        |
| ENSG00000255182 | ENSG00000255182 | 8  | 144495458 | 144505444 | processed_transcript                   | 270,85 | 0        |
| ENSG00000276550 | HERC2P2         | 15 | 22495570  | 22590815  | transcribed_unprocess<br>ed_pseudogene | 270,18 | 0        |
| ENSG00000248626 | GAPDHP40        | 5  | 159950493 | 159951498 | processed_pseudogene                   | 269,98 | 0        |
| ENSG00000274627 | ENSG00000274627 | 16 | 89516797  | 89522217  | sense_intronic                         | 269,70 | 0        |
| ENSG00000275678 | ENSG00000275678 | 1  | 67121605  | 67123956  | sense_intronic                         | 269,70 | 0        |
| ENSG00000228544 | CCDC183-AS1     | 9  | 136803927 | 136808848 | antisense                              | 265,73 | 0        |
| ENSG00000228275 | ARMCX3-AS1      | X  | 101622983 | 101624164 | antisense                              | 265,60 | 0        |
| ENSG00000236570 | RAD23BP1        | 3  | 18538673  | 18539899  | processed_pseudogene                   | 262,91 | 0        |
| ENSG00000124224 | PPP4R1L         | 20 | 58228940  | 58309439  | transcribed_unprocess<br>ed_pseudogene | 260,79 | 0        |
| ENSG00000271857 | ENSG00000271857 | 6  | 45421079  | 45422005  | antisense                              | 256,60 | 0        |
| ENSG00000226415 | TPI1P1          | 1  | 76699789  | 76700538  | processed_pseudogene                   | 254,74 | 0        |
| ENSG00000261716 | ENSG00000261716 | 1  | 149844498 | 149849024 | sense_overlapping                      | 251,00 | 0        |
| ENSG00000228612 | HK2P1           | X  | 80571871  | 80574607  | processed_pseudogene                   | 249,40 | 0        |
| ENSG00000260466 | ENSG00000260466 | 16 | 87836532  | 87837663  | antisense                              | 249,20 | 0        |
| ENSG00000243547 | HNRNP KP4       | 3  | 96349554  | 96350939  | processed_pseudogene                   | 248,31 | 0        |
| ENSG00000267282 | ENSG00000267282 | 19 | 44882027  | 44890876  | antisense                              | 242,50 | 0        |
| ENSG00000233110 | ENSG00000233110 | 4  | 185587909 | 185594003 | antisense                              | 241,00 | 0        |



|                 |                 |    |           |           |                                    |        |           |
|-----------------|-----------------|----|-----------|-----------|------------------------------------|--------|-----------|
| ENSG00000230508 | RPL19P21        | X  | 150993501 | 150994091 | processed_pseudogene               | 240,00 | 7,06E-02  |
| ENSG00000234420 | ZNF37BP         | 10 | 42513510  | 42552822  | transcribed_processed_pseudogene   | 238,44 | 0         |
| ENSG00000234975 | FBXN2           | 1  | 228687415 | 228687826 | processed_pseudogene               | 238,00 | 0         |
| ENSG00000257653 | ENSG00000257653 | 12 | 48766194  | 48767323  | antisense                          | 236,50 | 0         |
| ENSG00000232774 | ENSG00000232774 | 14 | 61570540  | 61658696  | lincRNA                            | 234,33 | 0         |
| ENSG00000261549 | ENSG00000261549 | 15 | 88989519  | 88990245  | processed_pseudogene               | 233,70 | 0         |
| ENSG00000273151 | ENSG00000273151 | 7  | 879790    | 886547    | antisense                          | 233,56 | 0         |
| ENSG00000260196 | ENSG00000260196 | 11 | 17380649  | 17383531  | antisense                          | 233,20 | 0         |
| ENSG00000205562 | ENSG00000205562 | 14 | 85524432  | 85529988  | lincRNA                            | 231,90 | 0         |
| ENSG00000256007 | ARAP1-AS1       | 11 | 72685075  | 72693808  | antisense                          | 231,73 | 0         |
| ENSG00000262533 | ENSG00000262533 | 17 | 2042900   | 2043425   | antisense                          | 231,56 | 0         |
| ENSG00000232499 | ENSG00000232499 | 1  | 113449700 | 113450728 | processed_pseudogene               | 230,60 | 0         |
| ENSG00000223768 | LINC00205       | 21 | 45293285  | 45297354  | lincRNA                            | 230,20 | 0         |
| ENSG00000258745 | ENSG00000258745 | 14 | 50912226  | 50913358  | antisense                          | 229,90 | 0         |
| ENSG00000173295 | FAM86B3P        | 8  | 8228595   | 8244865   | transcribed_unprocessed_pseudogene | 225,60 | 0         |
| ENSG00000233033 | CASK-AS1        | X  | 41520036  | 41522336  | antisense                          | 219,80 | 0         |
| ENSG00000215478 | CE55AP1         | 22 | 23359603  | 23387731  | transcribed_unprocessed_pseudogene | 218,80 | 0         |
| ENSG00000265069 | ENSG00000265069 | 18 | 6954677   | 6957419   | antisense                          | 218,50 | 0         |
| ENSG00000178146 | ENSG00000178146 | X  | 101778969 | 101780538 | processed_pseudogene               | 218,22 | 0         |
| ENSG00000257790 | EIF4A1P4        | 12 | 53153272  | 53154484  | processed_pseudogene               | 217,27 | 0,1392851 |
| ENSG00000264112 | ENSG00000264112 | 17 | 57989039  | 57994850  | lincRNA                            | 216,90 | 0         |
| ENSG00000225420 | ENSG00000225420 | 2  | 88538720  | 88575610  | antisense                          | 216,88 | 0         |
| ENSG00000246627 | CACNA1C-AS1     | 12 | 2676001   | 2691200   | antisense                          | 216,55 | 0         |
| ENSG00000230521 | HCG4P7          | 6  | 29887294  | 29888268  | unprocessed_pseudogene             | 215,50 | 0         |
| ENSG00000267395 | ENSG00000267395 | 19 | 45767796  | 45772504  | antisense                          | 215,20 | 0         |
| ENSG00000260852 | FBXL19-AS1      | 16 | 30919319  | 30923269  | antisense                          | 215,10 | 0         |
| ENSG00000261604 | ENSG00000261604 | 5  | 43287601  | 43290839  | antisense                          | 214,46 | 0         |
| ENSG00000263345 | ENSG00000263345 | 17 | 2375061   | 2379306   | antisense                          | 212,70 | 0         |
| ENSG00000248854 | HNRNPH1P3       | 5  | 55838801  | 55840025  | processed_pseudogene               | 212,50 | 0         |
| ENSG00000230551 | ENSG00000230551 | 5  | 149494314 | 149504670 | processed_transcript               | 211,18 | 0         |
| ENSG00000237417 | XRCC6P1         | 10 | 93206857  | 93209627  | processed_pseudogene               | 210,00 | 0         |
| ENSG00000231298 | LINC00704       | 10 | 4650185   | 4678154   | lincRNA                            | 206,90 | 0         |
| ENSG00000274904 | ENSG00000274904 | 16 | 30064306  | 30064825  | antisense                          | 206,14 | 0         |
| ENSG00000228804 | ENSG00000228804 | 3  | 187702313 | 187733849 | antisense                          | 205,82 | 0         |
| ENSG00000259939 | ENSG00000259939 | 16 | 8853312   | 8854347   | antisense                          | 205,63 | 0         |
| ENSG00000254307 | ENSG00000254307 | 8  | 94791643  | 94793106  | antisense                          | 203,23 | 0         |
| ENSG00000238000 | ENSG00000238000 | 5  | 98213402  | 98214121  | processed_pseudogene               | 203,00 | 0         |
| ENSG00000226312 | CFLAR-AS1       | 2  | 201140278 | 201157823 | antisense                          | 203,00 | 0         |
| ENSG00000245322 | ENSG00000245322 | 4  | 99950006  | 100195099 | antisense                          | 202,27 | 0         |
| ENSG00000281490 | CICP14          | 7  | 128655962 | 128658791 | processed_pseudogene               | 201,64 | 0         |
| ENSG00000266066 | POLRMT1P1       | 17 | 62136972  | 62140639  | processed_pseudogene               | 200,93 | 0         |
| ENSG00000259006 | ENSG00000259006 | 16 | 89919827  | 89922662  | antisense                          | 200,60 | 0         |
| ENSG00000272114 | ENSG00000272114 | 6  | 43770429  | 43770616  | antisense                          | 200,50 | 0         |
| ENSG00000280780 | JAKMIP2-AS1     | 5  | 147559994 | 147662009 | antisense                          | 199,30 | 0         |
| ENSG00000227051 | C14orf132       | 14 | 96039324  | 96094080  | lincRNA                            | 198,32 | 0         |
| ENSG00000250742 | ENSG00000250742 | 12 | 54126098  | 54142493  | lincRNA                            | 198,00 | 0         |
| ENSG00000267633 | ENSG00000267633 | 19 | 13772118  | 13774118  | antisense                          | 197,20 | 0         |
| ENSG00000248208 | ENSG00000248208 | 4  | 153658572 | 153659653 | processed_pseudogene               | 197,00 | 0         |
| ENSG00000228002 | DHX9P1          | 13 | 76984868  | 76987943  | processed_pseudogene               | 196,93 | 0         |
| ENSG00000271984 | ENSG00000271984 | 20 | 45892694  | 45893419  | antisense                          | 196,87 | 0         |
| ENSG00000203804 | ADAMTSL4-AS1    | 1  | 150560202 | 150574552 | processed_transcript               | 196,07 | 0         |
| ENSG00000257588 | ENSG00000257588 | 12 | 49951512  | 49962924  | antisense                          | 195,70 | 0         |
| ENSG00000258086 | ENSG00000258086 | 12 | 54353792  | 54466985  | antisense                          | 194,40 | 0         |
| ENSG00000254528 | ENSG00000254528 | 11 | 117833719 | 117838942 | antisense                          | 193,70 | 0         |
| ENSG00000240882 | ENSG00000240882 | 3  | 120306726 | 120307952 | processed_pseudogene               | 193,60 | 1,40E-02  |
| ENSG00000257181 | ENSG00000257181 | 12 | 68841288  | 68843237  | antisense                          | 193,35 | 0         |
| ENSG00000259953 | ENSG00000259953 | 9  | 112032555 | 112037730 | sense_overlapping                  | 193,09 | 0         |

|                 |                 |    |           |           |                                    |        |           |
|-----------------|-----------------|----|-----------|-----------|------------------------------------|--------|-----------|
| ENSG00000236060 | HSPB1P1         | 9  | 72007881  | 72008136  | processed_pseudogene               | 192,84 | 0,4850164 |
| ENSG00000273729 | ENSG00000273729 | 14 | 77028086  | 77031572  | antisense                          | 192,50 | 0         |
| ENSG00000259595 | ENSG00000259595 | 15 | 44402685  | 44427144  | antisense                          | 192,19 | 0         |
| ENSG00000248092 | NNT-AS1         | 5  | 43571594  | 43603230  | antisense                          | 189,90 | 0         |
| ENSG00000267512 | ENSG00000267512 | 19 | 13139617  | 13141147  | antisense                          | 189,67 | 0         |
| ENSG00000116883 | ENSG00000116883 | 1  | 36323734  | 36329221  | antisense                          | 188,80 | 0         |
| ENSG00000253645 | ENSG00000253645 | 8  | 38970360  | 38973011  | antisense                          | 187,30 | 0         |
| ENSG00000262112 | ENSG00000262112 | 17 | 56888880  | 56891841  | antisense                          | 185,40 | 0         |
| ENSG00000245156 | ENSG00000245156 | 11 | 66269832  | 66278525  | lincRNA                            | 185,09 | 0         |
| ENSG00000213383 | ENSG00000213383 | 3  | 17871729  | 17872598  | processed_pseudogene               | 184,55 | 0         |
| ENSG00000213650 | ENSG00000213650 | 7  | 56567906  | 56568858  | processed_pseudogene               | 184,46 | 0         |
| ENSG00000258012 | ENSG00000258012 | 12 | 92858079  | 92859273  | processed_pseudogene               | 183,83 | 0         |
| ENSG00000226721 | EEF1DP2         | 9  | 92836826  | 92837668  | processed_pseudogene               | 183,00 | 0         |
| ENSG00000237632 | S100A11P1       | 7  | 103262000 | 103262311 | processed_pseudogene               | 182,40 | 0         |
| ENSG00000178248 | ENSG00000178248 | 22 | 23462086  | 23486980  | lincRNA                            | 181,46 | 0         |
| ENSG00000227543 | SPAG5-AS1       | 17 | 28598790  | 28617377  | processed_transcript               | 181,10 | 0         |
| ENSG00000230807 | ENSG00000230807 | 3  | 27486247  | 27486617  | processed_pseudogene               | 181,10 | 0,2161218 |
| ENSG00000265678 | ENSG00000265678 | 17 | 82153430  | 82154815  | antisense                          | 180,10 | 0         |
| ENSG00000232267 | ACTR3P2         | X  | 68771322  | 68772578  | processed_pseudogene               | 179,20 | 0         |
| ENSG00000262528 | ENSG00000262528 | 16 | 654611    | 656194    | antisense                          | 177,60 | 0         |
| ENSG00000224280 | ENSG00000224280 | 7  | 16583782  | 16586757  | processed_pseudogene               | 175,90 | 0         |
| ENSG00000235852 | ENSG00000235852 | 2  | 190880797 | 190882059 | antisense                          | 175,73 | 0         |
| ENSG00000254211 | LINC01485       | 5  | 173786790 | 173809039 | lincRNA                            | 175,20 | 0         |
| ENSG00000275665 | ENSG00000275665 | 17 | 38715328  | 38720272  | antisense                          | 174,90 | 0         |
| ENSG00000233117 | LINC00702       | 10 | 4201141   | 4243912   | lincRNA                            | 173,50 | 0         |
| ENSG00000261578 | ENSG00000261578 | 11 | 76800364  | 76804555  | sense_overlapping                  | 172,70 | 0         |
| ENSG00000268191 | ENSG00000268191 | 19 | 6494320   | 6495025   | antisense                          | 172,00 | 0         |
| ENSG00000152117 | ENSG00000152117 | 2  | 131492813 | 131521573 | transcribed_processed_pseudogene   | 171,10 | 0         |
| ENSG00000226137 | BAIAP2-AS1      | 17 | 81029130  | 81034881  | lincRNA                            | 168,92 | 0         |
| ENSG00000166917 | MIR202HG        | 10 | 133246478 | 133247891 | antisense                          | 168,50 | 0         |
| ENSG00000260304 | ENSG00000260304 | 16 | 31182511  | 31183285  | antisense                          | 168,39 | 0         |
| ENSG00000263218 | ENSG00000263218 | 17 | 80999509  | 81000130  | antisense                          | 168,30 | 0         |
| ENSG00000226564 | FTH1P20         | 2  | 180872867 | 180873414 | processed_pseudogene               | 167,43 | 0         |
| ENSG00000218803 | GSTM2P1         | 6  | 111046868 | 111047521 | processed_pseudogene               | 167,40 | 0         |
| ENSG00000259081 | ENSG00000259081 | 14 | 76774284  | 76781518  | antisense                          | 167,35 | 0         |
| ENSG00000216624 | GAPDHP72        | 6  | 166064291 | 166065300 | processed_pseudogene               | 167,22 | 0         |
| ENSG00000261888 | ENSG00000261888 | 17 | 83104255  | 83106910  | lincRNA                            | 166,30 | 0         |
| ENSG00000255390 | ENSG00000255390 | 11 | 6621451   | 6622322   | antisense                          | 165,77 | 0         |
| ENSG00000273270 | ENSG00000273270 | 7  | 128524016 | 128531069 | lincRNA                            | 165,62 | 0         |
| ENSG00000224668 | IPO8P1          | 1  | 210859177 | 210862285 | processed_pseudogene               | 163,78 | 0         |
| ENSG00000244491 | ENSG00000244491 | 22 | 38734725  | 38738765  | antisense                          | 163,27 | 0         |
| ENSG00000231466 | ENSG00000231466 | 22 | 25349543  | 25350322  | processed_pseudogene               | 162,80 | 0         |
| ENSG00000271430 | ENSG00000271430 | X  | 74200229  | 74242148  | sense_intronic                     | 162,50 | 0         |
| ENSG00000275131 | ENSG00000275131 | 1  | 120489625 | 120579190 | unprocessed_pseudogene             | 162,12 | 0         |
| ENSG00000258501 | EIF3LP1         | 14 | 81916231  | 81917888  | processed_pseudogene               | 161,23 | 3,30E-03  |
| ENSG00000227741 | ENSG00000227741 | 1  | 160202199 | 160208869 | antisense                          | 161,09 | 0         |
| ENSG00000232748 | ENSG00000232748 | 16 | 31056460  | 31062803  | lincRNA                            | 160,46 | 0         |
| ENSG00000276101 | ENSG00000276101 | 17 | 81251194  | 81251803  | antisense                          | 159,00 | 0         |
| ENSG00000245937 | LINC01184       | 5  | 127940426 | 128083172 | lincRNA                            | 157,43 | 0         |
| ENSG00000213073 | ENSG00000213073 | 6  | 160093082 | 160096212 | transcribed_processed_pseudogene   | 156,10 | 0         |
| ENSG00000224645 | ENSG00000224645 | 1  | 151340648 | 151341966 | antisense                          | 155,80 | 0         |
| ENSG00000263142 | LRRC37A1P       | 17 | 46978481  | 47054569  | transcribed_unprocessed_pseudogene | 155,60 | 0         |
| ENSG00000251596 | HADHAP1         | 4  | 165404067 | 165406350 | processed_pseudogene               | 155,10 | 0         |
| ENSG00000226806 | ENSG00000226806 | 2  | 135820191 | 135823087 | antisense                          | 154,30 | 0         |
| ENSG00000183458 | ENSG00000183458 | 16 | 14911551  | 14935708  | transcribed_unprocessed_pseudogene | 154,10 | 0         |
| ENSG00000226925 | ENSG00000226925 | 2  | 102172621 | 102182108 | antisense                          | 153,90 | 0         |

|                 |                 |    |           |           |                                    |        |   |
|-----------------|-----------------|----|-----------|-----------|------------------------------------|--------|---|
| ENSG00000235587 | GAPDHP65        | X  | 46439709  | 46440714  | processed_pseudogene               | 153,53 | 0 |
| ENSG00000186301 | MST1P2          | 1  | 16645622  | 16650289  | unprocessed_pseudogene             | 153,40 | 0 |
| ENSG00000256448 | ENSG00000256448 | 11 | 73405297  | 73410682  | antisense                          | 153,35 | 0 |
| ENSG00000232229 | LINC00865       | 10 | 89829510  | 89840861  | lincRNA                            | 153,30 | 0 |
| ENSG00000234882 | EIF3EP1         | 6  | 73291962  | 73293277  | processed_pseudogene               | 152,23 | 0 |
| ENSG00000277476 | ENSG00000277476 | 17 | 68133201  | 68135935  | lincRNA                            | 151,40 | 0 |
| ENSG00000227198 | C6orf47-AS1     | 6  | 31658329  | 31660721  | antisense                          | 151,00 | 0 |
| ENSG00000236901 | MIR600HG        | 9  | 123109494 | 123115477 | sense_intronic                     | 150,89 | 0 |
| ENSG00000233503 | HNRNPLP1        | 6  | 7481094   | 7482594   | processed_pseudogene               | 149,82 | 0 |
| ENSG00000258469 | CHMP4BP1        | 14 | 55298644  | 55299231  | processed_pseudogene               | 149,10 | 0 |
| ENSG00000270706 | PRMT1P1         | 5  | 177265580 | 177266588 | processed_pseudogene               | 148,00 | 0 |
| ENSG00000229835 | KHSRPP1         | 9  | 21695176  | 21696943  | processed_pseudogene               | 147,28 | 0 |
| ENSG00000215835 | ENSG00000215835 | 1  | 166275629 | 166277597 | processed_pseudogene               | 146,81 | 0 |
| ENSG00000181741 | FDX1P1          | 20 | 34475924  | 34476474  | processed_pseudogene               | 146,40 | 0 |
| ENSG00000256569 | ENSG00000256569 | 12 | 120721507 | 120723639 | antisense                          | 145,69 | 0 |
| ENSG00000268205 | ENSG00000268205 | 19 | 57304305  | 57308562  | lincRNA                            | 145,65 | 0 |
| ENSG00000237493 | ENSG00000237493 | 12 | 55980432  | 55981035  | processed_pseudogene               | 145,38 | 0 |
| ENSG00000230364 | RPL4P3          | 1  | 171683128 | 171684438 | processed_pseudogene               | 145,00 | 0 |
| ENSG00000260267 | ENSG00000260267 | 16 | 31456711  | 31459736  | antisense                          | 144,90 | 0 |
| ENSG00000254815 | ENSG00000254815 | 11 | 557595    | 560107    | antisense                          | 144,72 | 0 |
| ENSG00000236942 | ENSG00000236942 | 1  | 205625483 | 205626153 | processed_pseudogene               | 144,36 | 0 |
| ENSG00000241627 | UBQLN4P1        | 3  | 148985868 | 148987668 | processed_pseudogene               | 144,28 | 0 |
| ENSG00000277534 | ENSG00000277534 | 18 | 26542971  | 26545791  | sense_intronic                     | 144,20 | 0 |
| ENSG00000281207 | SLFNL1-AS1      | 1  | 41014590  | 41043890  | antisense                          | 143,53 | 0 |
| ENSG00000273419 | ENSG00000273419 | 7  | 149858400 | 149862492 | antisense                          | 143,50 | 0 |
| ENSG00000269439 | ENSG00000269439 | 19 | 17488990  | 17511889  | lincRNA                            | 143,46 | 0 |
| ENSG00000261614 | ENSG00000261614 | 16 | 31568386  | 31569475  | processed_pseudogene               | 143,35 | 0 |
| ENSG00000278175 | GLIDR           | 9  | 39807361  | 39810063  | lincRNA                            | 142,50 | 0 |
| ENSG00000232623 | ENSG00000232623 | 21 | 32306464  | 32308737  | antisense                          | 142,40 | 0 |
| ENSG00000228983 | SLC47A1P1       | 17 | 19579943  | 19596058  | transcribed_unprocessed_pseudogene | 142,20 | 0 |
| ENSG00000249786 | EAF1-AS1        | 3  | 15436171  | 15455940  | antisense                          | 142,13 | 0 |
| ENSG00000248593 | DSTNP2          | 12 | 6884682   | 6885786   | transcribed_unprocessed_pseudogene | 142,00 | 0 |
| ENSG00000258384 | ENSG00000258384 | 15 | 90952239  | 90955225  | antisense                          | 141,92 | 0 |
| ENSG00000227942 | FRMD8P1         | X  | 65550898  | 65552421  | processed_pseudogene               | 141,40 | 0 |
| ENSG00000259211 | ENSG00000259211 | 15 | 40464193  | 40466726  | antisense                          | 141,20 | 0 |
| ENSG00000269987 | ENSG00000269987 | 22 | 30976515  | 30978848  | lincRNA                            | 141,06 | 0 |
| ENSG00000262791 | ENSG00000262791 | 17 | 1725748   | 1738585   | antisense                          | 140,90 | 0 |
| ENSG00000230584 | CCT5P2          | 13 | 78908919  | 78910542  | processed_pseudogene               | 139,08 | 0 |
| ENSG00000231955 | ENSG00000231955 | 2  | 206115547 | 206122323 | antisense                          | 138,90 | 0 |
| ENSG00000268858 | ENSG00000268858 | 20 | 63861212  | 63864293  | antisense                          | 138,15 | 0 |
| ENSG00000267533 | ENSG00000267533 | 18 | 12067173  | 12068417  | processed_pseudogene               | 137,60 | 0 |
| ENSG00000224975 | INE1            | X  | 47204921  | 47205865  | sense_intronic                     | 137,20 | 0 |
| ENSG00000124549 | BTN2A3P         | 6  | 26421391  | 26432383  | transcribed_unprocessed_pseudogene | 136,80 | 0 |
| ENSG00000223599 | ENSG00000223599 | 1  | 153852106 | 153853414 | processed_pseudogene               | 136,43 | 0 |
| ENSG00000278713 | ENSG00000278713 | 16 | 29862760  | 29863417  | antisense                          | 135,90 | 0 |
| ENSG00000275764 | ENSG00000275764 | 12 | 27037100  | 27038960  | lincRNA                            | 135,70 | 0 |
| ENSG00000235027 | ENSG00000235027 | 11 | 1760348   | 1762486   | antisense                          | 134,53 | 0 |
| ENSG00000225568 | ENSG00000225568 | 1  | 87045875  | 87046700  | processed_pseudogene               | 134,45 | 0 |
| ENSG00000277449 | CEBPB-AS1       | 20 | 50184598  | 50191498  | antisense                          | 133,82 | 0 |
| ENSG00000256072 | ENSG00000256072 | 12 | 66251745  | 66257434  | antisense                          | 133,70 | 0 |
| ENSG00000260111 | ENSG00000260111 | 16 | 70379457  | 70399502  | antisense                          | 133,40 | 0 |
| ENSG00000254681 | PKD1P5          | 16 | 18374521  | 18401940  | transcribed_unprocessed_pseudogene | 133,10 | 0 |
| ENSG00000261641 | ENSG00000261641 | 16 | 1445343   | 1446519   | antisense                          | 132,97 | 0 |
| ENSG00000229056 | ENSG00000229056 | 2  | 196260024 | 196264204 | antisense                          | 132,70 | 0 |
| ENSG00000278133 | ENSG00000278133 | 16 | 31122235  | 31124064  | sense_intronic                     | 132,40 | 0 |
| ENSG00000229180 | ENSG00000229180 | 7  | 66526088  | 66542624  | lincRNA                            | 132,30 | 0 |

|                 |                 |    |           |           |                                        |        |           |
|-----------------|-----------------|----|-----------|-----------|----------------------------------------|--------|-----------|
| ENSG00000280832 | ST3GAL4-AS1     | 11 | 126340889 | 126355587 | antisense                              | 132,30 | 0         |
| ENSG00000251095 | ENSG00000251095 | 4  | 89551356  | 89726752  | antisense                              | 132,10 | 0         |
| ENSG00000204429 | ENSG00000204429 | 9  | 88180673  | 88181447  | processed_pseudogene                   | 132,00 | 0         |
| ENSG00000281371 | INE2            | X  | 15785716  | 15787589  | antisense                              | 132,00 | 0         |
| ENSG00000264538 | SUZ12P1         | 17 | 30709299  | 30790908  | transcribed_unprocess<br>ed_pseudogene | 131,90 | 0         |
| ENSG00000257607 | ENSG00000257607 | 7  | 1055360   | 1059261   | antisense                              | 131,90 | 0         |
| ENSG00000177822 | ENSG00000177822 | 4  | 181874438 | 182145249 | antisense                              | 131,90 | 0         |
| ENSG00000188681 | TEKT4P2         | 21 | 9068361   | 9129752   | transcribed_unprocess<br>ed_pseudogene | 131,70 | 0         |
| ENSG00000249207 | ENSG00000249207 | 4  | 39112677  | 39126818  | antisense                              | 131,38 | 0         |
| ENSG00000265096 | C1QTNF1-AS1     | 17 | 79019209  | 79027655  | antisense                              | 131,20 | 0         |
| ENSG00000240132 | ETF1P2          | 7  | 151501878 | 151503463 | processed_pseudogene                   | 130,93 | 0         |
| ENSG00000228986 | ENSG00000228986 | X  | 155292169 | 155293432 | processed_pseudogene                   | 130,54 | 0         |
| ENSG00000237575 | PYY2            | 17 | 28226563  | 28228065  | transcribed_unprocess<br>ed_pseudogene | 130,50 | 0         |
| ENSG00000213003 | BTF3P12         | 8  | 70273369  | 70273837  | processed_pseudogene                   | 130,10 | 0,2161218 |
| ENSG00000261490 | ENSG00000261490 | 4  | 10068089  | 10073019  | sense_overlapping                      | 130,05 | 0         |
| ENSG00000259187 | ENSG00000259187 | 15 | 44826540  | 44827094  | lincRNA                                | 130,00 | 0         |
| ENSG00000227347 | HNRNP KP2       | 2  | 136199114 | 136200503 | processed_pseudogene                   | 129,83 | 0         |
| ENSG00000133624 | ZNF767P         | 7  | 149547154 | 149624752 | transcribed_unprocess<br>ed_pseudogene | 129,43 | 0         |
| ENSG00000206195 | ENSG00000206195 | 22 | 15784959  | 15829984  | processed_transcript                   | 129,11 | 0         |
| ENSG00000223722 | ENSG00000223722 | 12 | 31754720  | 31755121  | processed_pseudogene                   | 129,10 | 0         |
| ENSG00000255387 | ENSG00000255387 | 11 | 4210354   | 4212091   | processed_pseudogene                   | 129,05 | 0         |
| ENSG00000235512 | TAB3-AS2        | X  | 30854321  | 30854707  | antisense                              | 128,89 | 0         |
| ENSG00000225536 | STIP1P3         | X  | 86084716  | 86086339  | processed_pseudogene                   | 128,78 | 0         |
| ENSG00000205940 | HSP90AB2P       | 4  | 13333414  | 13338657  | transcribed_processed_<br>pseudogene   | 128,43 | 0,4036702 |
| ENSG00000218502 | H2AFZP3         | 13 | 99215372  | 99215758  | processed_pseudogene                   | 128,33 | 0         |
| ENSG00000225648 | SBDSP1          | 7  | 72829425  | 72836701  | transcribed_unprocess<br>ed_pseudogene | 128,10 | 0         |
| ENSG00000261457 | ENSG00000261457 | 16 | 31802947  | 31807973  | transcribed_processed_<br>pseudogene   | 128,00 | 0         |
| ENSG00000233459 | ENSG00000233459 | 2  | 203634577 | 203636016 | processed_pseudogene                   | 127,20 | 0         |
| ENSG00000225131 | PSME2P2         | 13 | 48771128  | 48771827  | processed_pseudogene                   | 126,90 | 0         |
| ENSG00000278772 | LINC00548       | 13 | 40194509  | 40220502  | lincRNA                                | 126,70 | 0         |
| ENSG00000187984 | ANKRD19P        | 9  | 92809388  | 92888693  | transcribed_unprocess<br>ed_pseudogene | 126,29 | 0         |
| ENSG00000219410 | ENSG00000219410 | 12 | 6663260   | 6672069   | antisense                              | 126,12 | 0         |
| ENSG00000269371 | ENSG00000269371 | 19 | 7519916   | 7520460   | antisense                              | 126,00 | 0         |
| ENSG00000257243 | ENSG00000257243 | 12 | 49595148  | 49595688  | processed_pseudogene                   | 125,70 | 1,40E-02  |
| ENSG00000260005 | ENSG00000260005 | 17 | 81228707  | 81233983  | antisense                              | 125,47 | 0         |
| ENSG00000253606 | AFG3L2P1        | 8  | 43270198  | 43271960  | processed_pseudogene                   | 125,35 | 0         |
| ENSG00000263232 | ATP5A1P3        | 16 | 72005037  | 72006543  | processed_pseudogene                   | 124,97 | 0         |
| ENSG00000232098 | ENSG00000232098 | 19 | 58404238  | 58408484  | lincRNA                                | 124,90 | 0         |
| ENSG00000214279 | ENSG00000214279 | 10 | 133453928 | 133523558 | unitary_pseudogene                     | 123,69 | 0         |
| ENSG00000254665 | ENSG00000254665 | 11 | 8693357   | 8696607   | antisense                              | 123,53 | 0         |
| ENSG00000218582 | GAPDHP63        | 6  | 79953005  | 79954011  | processed_pseudogene                   | 123,30 | 0         |
| ENSG00000273137 | ENSG00000273137 | 22 | 50208461  | 50209542  | antisense                              | 123,20 | 0         |
| ENSG00000257809 | ENSG00000257809 | 12 | 56150796  | 56158220  | antisense                              | 122,47 | 0         |
| ENSG00000230432 | ENSG00000230432 | 2  | 219299002 | 219304130 | antisense                              | 121,80 | 0         |
| ENSG00000265646 | TUFMP1          | 17 | 27082690  | 27084036  | processed_pseudogene                   | 120,87 | 1,95E-02  |
| ENSG00000245148 | ARAP1-AS2       | 11 | 72700474  | 72705607  | antisense                              | 120,80 | 0         |
| ENSG00000225674 | IPO7P2          | 13 | 24122065  | 24123814  | processed_pseudogene                   | 120,68 | 0         |
| ENSG00000251235 | SNRCP2          | 5  | 76376675  | 76377149  | processed_pseudogene                   | 120,50 | 0         |
| ENSG00000269292 | ENSG00000269292 | 19 | 46609277  | 46610779  | antisense                              | 120,49 | 0         |
| ENSG00000256393 | RPL41P5         | 12 | 93083598  | 93083675  | processed_pseudogene                   | 120,40 | 0         |
| ENSG00000270015 | ENSG00000270015 | 15 | 30926514  | 30928407  | sense_intronic                         | 120,20 | 0         |
| ENSG00000267858 | MZF1-AS1        | 19 | 58559129  | 58574797  | antisense                              | 119,86 | 0         |
| ENSG00000262580 | ENSG00000262580 | 17 | 80200673  | 80205949  | antisense                              | 119,61 | 0         |

|                 |                 |    |           |           |                                    |        |           |
|-----------------|-----------------|----|-----------|-----------|------------------------------------|--------|-----------|
| ENSG00000269480 | ENSG00000269480 | 19 | 17207138  | 17208010  | antisense                          | 119,31 | 0         |
| ENSG00000228203 | RNF144A-AS1     | 2  | 6912277   | 6918709   | processed_transcript               | 118,90 | 0         |
| ENSG00000225439 | BOLA3-AS1       | 2  | 74148009  | 74150061  | antisense                          | 118,33 | 0         |
| ENSG00000181260 | MTHFD2P7        | 3  | 179464346 | 179465328 | processed_pseudogene               | 117,90 | 0         |
| ENSG00000229320 | KRT8P12         | 3  | 160565447 | 160569248 | transcribed_processed_pseudogene   | 117,80 | 0         |
| ENSG00000254618 | TMED10P1        | 8  | 144994886 | 144995540 | processed_pseudogene               | 117,09 | 0         |
| ENSG00000267122 | ENSG00000267122 | 19 | 2212029   | 2215565   | antisense                          | 116,78 | 0         |
| ENSG00000279010 | ENSG00000279010 | 22 | 37948352  | 38002889  | sense_overlapping                  | 116,67 | 0         |
| ENSG00000255680 | ENSG00000255680 | 11 | 6618790   | 6619764   | antisense                          | 116,67 | 0         |
| ENSG00000258021 | ENSG00000258021 | 12 | 51900565  | 51901336  | processed_pseudogene               | 116,30 | 0         |
| ENSG00000213290 | PGK1P2          | 19 | 12559571  | 12561105  | processed_pseudogene               | 116,05 | 0         |
| ENSG00000204959 | ARHGEF34P       | 7  | 144272445 | 144286966 | unprocessed_pseudogene             | 116,00 | 0         |
| ENSG00000244171 | PBX2P1          | 3  | 143176327 | 143177617 | processed_pseudogene               | 115,87 | 0         |
| ENSG00000241313 | WWTR1-AS1       | 3  | 149657020 | 149661364 | antisense                          | 115,80 | 0         |
| ENSG00000273038 | ENSG00000273038 | 10 | 32887255  | 32889311  | lincRNA                            | 115,68 | 0         |
| ENSG00000254859 | ENSG00000254859 | 8  | 143541973 | 143549729 | antisense                          | 115,24 | 0         |
| ENSG00000257151 | PWAR6           | 15 | 25031873  | 25036490  | lincRNA                            | 114,79 | 0         |
| ENSG00000228223 | HCG11           | 6  | 26523450  | 26526579  | lincRNA                            | 114,60 | 0         |
| ENSG00000248734 | ENSG00000248734 | 5  | 96784777  | 96785999  | antisense                          | 114,50 | 0         |
| ENSG00000224713 | ENSG00000224713 | 12 | 57612118  | 57619638  | antisense                          | 114,30 | 0         |
| ENSG00000099725 | PRKY            | X  | 7273972   | 7381548   | transcribed_unprocessed_pseudogene | 114,00 | 1,40E-02  |
| ENSG00000233347 | ERP29P1         | 20 | 52110344  | 52111049  | processed_pseudogene               | 113,22 | 0         |
| ENSG00000261799 | ENSG00000261799 | 12 | 273954    | 277123    | sense_overlapping                  | 112,65 | 0         |
| ENSG00000232656 | ID12-AS1        | 10 | 1022666   | 1044201   | antisense                          | 112,55 | 0         |
| ENSG00000237438 | CECR7           | 22 | 17036570  | 17060825  | lincRNA                            | 112,45 | 0         |
| ENSG00000277801 | ENSG00000277801 | 14 | 89156743  | 89157574  | lincRNA                            | 112,10 | 0         |
| ENSG00000260766 | ENSG00000260766 | 1  | 160024953 | 160026794 | sense_overlapping                  | 112,00 | 0         |
| ENSG00000170919 | TPT1-AS1        | 13 | 45341345  | 45393413  | antisense                          | 111,96 | 0         |
| ENSG00000269976 | ENSG00000269976 | 2  | 20586248  | 20586686  | lincRNA                            | 111,80 | 0         |
| ENSG00000238057 | ZEB2-AS1        | 2  | 144518097 | 144521477 | antisense                          | 111,50 | 0         |
| ENSG00000188242 | ENSG00000188242 | 5  | 466124    | 473098    | antisense                          | 111,48 | 0         |
| ENSG00000230185 | C9orf147        | 9  | 112433816 | 112487204 | antisense                          | 111,37 | 0         |
| ENSG00000239791 | ENSG00000239791 | 16 | 30572250  | 30583860  | antisense                          | 111,30 | 0         |
| ENSG00000228492 | RAB11FIP1P1     | X  | 74202834  | 74204595  | processed_pseudogene               | 111,10 | 0         |
| ENSG00000219565 | ZNF259P1        | 6  | 108782126 | 108787053 | transcribed_processed_pseudogene   | 111,00 | 0         |
| ENSG00000236496 | GPS2P1          | 9  | 2875442   | 2876427   | processed_pseudogene               | 110,73 | 0         |
| ENSG00000261691 | ENSG00000261691 | 16 | 547185    | 553847    | antisense                          | 110,57 | 0         |
| ENSG00000258581 | ENSG00000258581 | 14 | 100366628 | 100366920 | processed_pseudogene               | 110,50 | 0,2161218 |
| ENSG00000261559 | FSCN1P1         | 15 | 34494420  | 34495900  | processed_pseudogene               | 109,70 | 0         |
| ENSG00000271646 | ENSG00000271646 | 4  | 184474802 | 184477304 | lincRNA                            | 109,70 | 0         |
| ENSG00000248180 | GAPDHP60        | 4  | 87207092  | 87208086  | processed_pseudogene               | 109,12 | 0         |
| ENSG00000227827 | ENSG00000227827 | 16 | 16356224  | 16377507  | unprocessed_pseudogene             | 108,80 | 0         |
| ENSG00000235371 | ENSG00000235371 | 1  | 236110061 | 236112370 | processed_pseudogene               | 108,45 | 0         |
| ENSG00000270100 | ENSG00000270100 | 2  | 20678254  | 20678932  | lincRNA                            | 108,40 | 0         |
| ENSG00000268854 | ENSG00000268854 | 19 | 50480119  | 50483351  | antisense                          | 107,30 | 0         |
| ENSG00000265148 | BZRAP1-AS1      | 17 | 58325450  | 58415766  | antisense                          | 107,17 | 0         |
| ENSG00000251411 | ENSG00000251411 | 4  | 86913266  | 86914817  | processed_pseudogene               | 107,14 | 0         |
| ENSG00000175730 | BAK1P1          | 20 | 32690180  | 32690815  | processed_pseudogene               | 107,10 | 0         |
| ENSG00000273747 | ENSG00000273747 | 15 | 83020115  | 83020802  | antisense                          | 107,10 | 0         |
| ENSG00000257043 | ENSG00000257043 | 11 | 18665050  | 18665548  | processed_pseudogene               | 106,97 | 0         |
| ENSG00000261822 | ENSG00000261822 | 15 | 42567031  | 42569994  | antisense                          | 106,50 | 0         |
| ENSG00000186676 | EEF1GP1         | 7  | 125033453 | 125035301 | processed_pseudogene               | 106,23 | 0         |
| ENSG00000228232 | GAPDHP1         | X  | 39787132  | 39788136  | processed_pseudogene               | 106,17 | 0         |
| ENSG00000273066 | ENSG00000273066 | 9  | 136799223 | 136810042 | processed_transcript               | 106,07 | 0         |
| ENSG00000268509 | ENSG00000268509 | 3  | 5187172   | 5188298   | antisense                          | 106,00 | 0         |
| ENSG00000260246 | ENSG00000260246 | 1  | 109693117 | 109693742 | antisense                          | 106,00 | 0         |

|                 |                 |    |           |           |                                     |        |          |
|-----------------|-----------------|----|-----------|-----------|-------------------------------------|--------|----------|
| ENSG00000257342 | ENSG00000257342 | 12 | 57694132  | 57721510  | antisense                           | 105,91 | 0        |
| ENSG00000269972 | ENSG00000269972 | 22 | 30977516  | 30977858  | lincRNA                             | 105,85 | 0        |
| ENSG00000243302 | ENSG00000243302 | 7  | 128651185 | 128652334 | processed_pseudogene                | 105,77 | 0        |
| ENSG00000257764 | ENSG00000257764 | 12 | 69353493  | 69354225  | antisense                           | 105,00 | 0        |
| ENSG00000269487 | ENSG00000269487 | 19 | 46728603  | 46732700  | antisense                           | 104,55 | 0        |
| ENSG00000228218 | ATF4P3          | 17 | 76225751  | 76226806  | processed_pseudogene                | 104,44 | 0        |
| ENSG00000260822 | ENSG00000260822 | X  | 24545516  | 24550466  | sense_overlapping                   | 104,43 | 0        |
| ENSG00000267755 | ENSG00000267755 | 19 | 1376773   | 1377520   | antisense                           | 104,26 | 0        |
| ENSG00000223414 | LINC00473       | 6  | 165908802 | 165988048 | lincRNA                             | 104,20 | 0        |
| ENSG00000228739 | ENSG00000228739 | 9  | 6047360   | 6066714   | lincRNA                             | 104,10 | 0        |
| ENSG00000259144 | RANBP20P        | 14 | 20720742  | 20723127  | processed_pseudogene                | 103,90 | 0        |
| ENSG00000228343 | ENSG00000228343 | X  | 48579774  | 48581157  | antisense                           | 103,40 | 0        |
| ENSG00000214810 | CYCSP55         | 6  | 34219439  | 34220066  | processed_pseudogene                | 103,31 | 0        |
| ENSG00000236276 | NDP-AS1         | X  | 43949732  | 43969620  | antisense                           | 103,30 | 0        |
| ENSG00000232295 | ENSG00000232295 | 6  | 71221457  | 71328228  | processed_transcript                | 102,80 | 0        |
| ENSG00000251017 | ENSG00000251017 | 4  | 74085995  | 74086672  | processed_pseudogene                | 102,50 | 0        |
|                 |                 |    |           |           | unprocessed_pseudog <sup>e</sup>    |        |          |
| ENSG00000274471 | ENSG00000274471 | 15 | 23309607  | 23313276  | ne                                  | 102,20 | 0        |
| ENSG00000225733 | FGD5-AS1        | 3  | 14920347  | 14948424  | antisense                           | 102,07 | 0        |
| ENSG00000261335 | ENSG00000261335 | 17 | 76671942  | 76673658  | antisense                           | 101,70 | 0        |
|                 |                 |    |           |           | transcribed_unprocess <sup>e</sup>  |        |          |
| ENSG00000230006 | ANKRD36BP2      | 2  | 88765807  | 88806612  | ed_pseudogene                       | 101,15 | 0        |
| ENSG00000277147 | LINC00869       | 1  | 149606334 | 149679523 | lincRNA                             | 101,10 | 0        |
| ENSG00000238193 | ENSG00000238193 | X  | 5305714   | 5307128   | processed_pseudogene                | 101,08 | 0        |
| ENSG00000229152 | ANKRD10-IT1     | 13 | 110894639 | 110899172 | sense_intronic                      | 100,90 | 0        |
| ENSG00000264769 | ENSG00000264769 | 17 | 81922899  | 81924511  | antisense                           | 100,82 | 0        |
| ENSG00000227973 | PIN4P1          | 15 | 43875849  | 43876244  | processed_pseudogene                | 100,73 | 0        |
| ENSG00000261373 | VPS9D1-AS1      | 16 | 89711856  | 89718165  | antisense                           | 100,49 | 0        |
| ENSG00000245864 | ENSG00000245864 | 5  | 88676218  | 88722831  | antisense                           | 100,20 | 0        |
| ENSG00000203914 | HSP90B3P        | 1  | 91642516  | 91644082  | processed_pseudogene                | 99,98  | 0        |
| ENSG00000261532 | ENSG00000261532 | 16 | 2211997   | 2212863   | lincRNA                             | 99,60  | 0        |
| ENSG00000267317 | ENSG00000267317 | 19 | 1457670   | 1458580   | antisense                           | 99,50  | 0        |
| ENSG00000231948 | HS1BP3-IT1      | 2  | 20590775  | 20592548  | sense_intronic                      | 98,70  | 0        |
| ENSG00000255310 | ENSG00000255310 | 8  | 11107788  | 11109726  | sense_intronic                      | 98,67  | 0        |
| ENSG00000259607 | ENSG00000259607 | 8  | 29067279  | 29068454  | antisense                           | 98,55  | 0        |
| ENSG00000257851 | HNRNPA3P10      | 12 | 51712469  | 51713606  | processed_pseudogene                | 98,55  | 0        |
|                 |                 |    |           |           | transcribed_processed_ <sup>e</sup> |        |          |
| ENSG00000241749 | RPSAP52         | 12 | 65758020  | 65826997  | pseudogene                          | 98,50  | 0        |
| ENSG00000237686 | ENSG00000237686 | 6  | 43995723  | 44074652  | antisense                           | 98,40  | 0        |
| ENSG00000249859 | PVT1            | 8  | 127794533 | 128101253 | lincRNA                             | 97,80  | 0        |
|                 |                 |    |           |           | transcribed_processed_ <sup>e</sup> |        |          |
| ENSG00000223361 | FBXW7           | 5  | 17353695  | 17354624  | pseudogene                          | 97,67  | 0        |
| ENSG00000231542 | TAB3-AS1        | X  | 30834623  | 30835300  | antisense                           | 97,40  | 0        |
| ENSG00000228264 | PSMD8P1         | 1  | 154414369 | 154415137 | processed_pseudogene                | 97,10  | 0        |
| ENSG00000237781 | ENSG00000237781 | 1  | 150548562 | 150557724 | antisense                           | 96,80  | 0        |
| ENSG00000266469 | ENSG00000266469 | 17 | 39401793  | 39406233  | antisense                           | 96,32  | 0        |
| ENSG00000248648 | ENSG00000248648 | 5  | 133003119 | 133003365 | processed_pseudogene                | 96,30  | 7,06E-02 |
| ENSG00000269652 | ENSG00000269652 | 19 | 41221426  | 41222051  | antisense                           | 96,10  | 0        |
| ENSG00000253200 | ENSG00000253200 | 8  | 22613908  | 22616657  | antisense                           | 96,01  | 0        |
| ENSG00000229372 | SZT2-AS1        | 1  | 43447776  | 43448644  | antisense                           | 96,00  | 0        |
| ENSG00000218305 | CDC14C          | 7  | 48919765  | 48926013  | processed_pseudogene                | 95,80  | 0        |
|                 |                 |    |           |           | transcribed_unprocess <sup>e</sup>  |        |          |
| ENSG00000205746 | ENSG00000205746 | 16 | 18334400  | 18352476  | ed_pseudogene                       | 95,40  | 0        |
| ENSG00000254721 | ENSG00000254721 | 11 | 70206291  | 70207390  | antisense                           | 95,04  | 0        |
| ENSG00000236509 | RPL21P133       | X  | 134607157 | 134607632 | processed_pseudogene                | 94,40  | 0        |
| ENSG00000225282 | ENSG00000225282 | 22 | 23926900  | 23929574  | processed_pseudogene                | 94,30  | 7,06E-02 |
| ENSG00000254708 | ENSG00000254708 | 11 | 34335118  | 34336003  | processed_pseudogene                | 94,20  | 0        |
| ENSG00000235674 | LDHAP2          | 1  | 235738005 | 235738989 | processed_pseudogene                | 93,96  | 0        |
| ENSG00000250802 | ZBED3-AS1       | 5  | 77086740  | 77166909  | antisense                           | 93,90  | 0        |
| ENSG00000255949 | ENSG00000255949 | 11 | 67431367  | 67435399  | antisense                           | 93,88  | 0        |

|                 |                 |    |           |           |                                        |       |          |
|-----------------|-----------------|----|-----------|-----------|----------------------------------------|-------|----------|
| ENSG00000106610 | STAG3L4         | 7  | 67302621  | 67321526  | transcribed_unprocess<br>ed_pseudogene | 93,86 | 0        |
| ENSG00000264739 | ENSG00000264739 | 17 | 16414524  | 16416689  | antisense                              | 93,80 | 0        |
| ENSG00000233467 | ENSG00000233467 | X  | 148198014 | 148198878 | processed_pseudogene                   | 93,40 | 0        |
| ENSG00000238132 | CASC4P1         | 13 | 19563589  | 19564900  | processed_pseudogene                   | 93,36 | 0        |
| ENSG00000279080 | ENSG00000279080 | 22 | 38130216  | 38150612  | antisense                              | 93,20 | 0        |
| ENSG00000260804 | ENSG00000260804 | 2  | 216217045 | 216220192 | lincRNA                                | 93,08 | 0        |
| ENSG00000246451 | ENSG00000246451 | 14 | 103682362 | 103684015 | antisense                              | 93,00 | 0        |
| ENSG00000255967 | ENSG00000255967 | 12 | 8634367   | 8637608   | processed_pseudogene                   | 93,00 | 0        |
| ENSG00000267034 | ENSG00000267034 | 2  | 222317242 | 222318653 | lincRNA                                | 92,90 | 0        |
| ENSG00000232593 | KANTR           | X  | 53094145  | 53167014  | lincRNA                                | 92,67 | 0        |
| ENSG00000269044 | ENSG00000269044 | 19 | 16633797  | 16635269  | sense_intronic                         | 92,40 | 0        |
| ENSG00000235217 | TSPY26P         | 20 | 32186477  | 32190527  | transcribed_processed_<br>pseudogene   | 92,20 | 0        |
| ENSG00000233554 | B4GALT1-AS1     | 9  | 33166975  | 33179983  | antisense                              | 91,90 | 0        |
| ENSG00000219507 | FTH1P8          | X  | 148052233 | 148052746 | processed_pseudogene                   | 91,80 | 0        |
| ENSG00000232951 | IPO7P1          | X  | 51921864  | 51922499  | processed_pseudogene                   | 91,80 | 0        |
| ENSG00000265511 | ENSG00000265511 | 17 | 17507351  | 17508308  | antisense                              | 91,20 | 0        |
| ENSG00000243974 | VT11BP1         | 3  | 100225374 | 100226073 | processed_pseudogene                   | 91,20 | 0        |
| ENSG00000271474 | ENSG00000271474 | 4  | 95549129  | 9552457   | antisense                              | 90,80 | 0        |
| ENSG00000263171 | ENSG00000263171 | 17 | 7352687   | 7354944   | antisense                              | 90,73 | 0        |
| ENSG00000224080 | UBE2FP1         | 3  | 37143512  | 37143958  | processed_pseudogene                   | 90,30 | 0        |
| ENSG00000260083 | MIR762HG        | 16 | 30875222  | 30895220  | antisense                              | 90,23 | 0        |
| ENSG00000244578 | LINC01391       | 3  | 138935189 | 138944020 | lincRNA                                | 90,20 | 0        |
| ENSG00000272335 | ENSG00000272335 | 5  | 44826076  | 44828592  | lincRNA                                | 90,00 | 0        |
| ENSG00000260404 | ENSG00000260404 | 4  | 118591773 | 118633729 | transcribed_unprocess<br>ed_pseudogene | 90,00 | 0        |
| ENSG00000244026 | FAM86DP         | 3  | 75421552  | 75435110  | transcribed_unprocess<br>ed_pseudogene | 89,85 | 0        |
| ENSG00000253540 | FAM86HP         | 3  | 130099092 | 130111472 | transcribed_unprocess<br>ed_pseudogene | 89,60 | 0        |
| ENSG00000235813 | ENSG00000235813 | X  | 134599457 | 134606254 | lincRNA                                | 89,40 | 0        |
| ENSG00000258945 | ENSG00000258945 | 14 | 85528599  | 85529386  | lincRNA                                | 89,20 | 0        |
| ENSG00000186076 | ENSG00000186076 | 12 | 93640822  | 93641586  | processed_pseudogene                   | 88,81 | 3,30E-03 |
| ENSG00000248839 | ENSG00000248839 | 3  | 98522570  | 98525334  | antisense                              | 88,80 | 0        |
| ENSG00000278206 | ENSG00000278206 | 6  | 143484979 | 143507327 | processed_transcript                   | 88,67 | 0        |
| ENSG00000260941 | LINC00622       | 1  | 119597702 | 119599271 | sense_overlapping                      | 88,60 | 0        |
| ENSG00000259536 | ENSG00000259536 | 15 | 40488041  | 40558019  | antisense                              | 88,41 | 0        |
| ENSG00000255108 | ENSG00000255108 | 11 | 823634    | 832883    | antisense                              | 88,11 | 0        |
| ENSG00000235351 | ENSG00000235351 | 2  | 241724615 | 241725693 | antisense                              | 87,80 | 0        |
| ENSG00000235872 | ENSG00000235872 | 12 | 67658991  | 67670919  | antisense                              | 87,75 | 0        |
| ENSG00000261662 | ENSG00000261662 | 1  | 119909255 | 119910613 | sense_overlapping                      | 87,70 | 0        |
| ENSG00000197182 | MIRLET7BHG      | 22 | 46053869  | 46113928  | lincRNA                                | 87,36 | 0        |
| ENSG00000232878 | DPYD-AS1        | 1  | 97095923  | 97322955  | antisense                              | 86,50 | 0        |
| ENSG00000266642 | ENSG00000266642 | 17 | 28897738  | 28899402  | antisense                              | 86,30 | 0        |
| ENSG00000261295 | ENSG00000261295 | X  | 100673330 | 100673981 | antisense                              | 86,20 | 0        |
| ENSG00000244560 | ENSG00000244560 | 7  | 149285281 | 149297312 | transcribed_unprocess<br>ed_pseudogene | 86,00 | 0        |
| ENSG00000250538 | ENSG00000250538 | 4  | 155206529 | 155209027 | antisense                              | 86,00 | 0        |
| ENSG00000244586 | WNT5A-AS1       | 3  | 55487699  | 55488308  | antisense                              | 86,00 | 0        |
| ENSG00000266993 | ENSG00000266993 | 1  | 51793934  | 51799154  | antisense                              | 86,00 | 0        |
| ENSG00000267352 | SH3GL1P3        | 17 | 68134675  | 68135604  | processed_pseudogene                   | 85,90 | 0        |
| ENSG00000247699 | ENSG00000247699 | 5  | 160195744 | 160204826 | antisense                              | 85,80 | 0        |
| ENSG00000236090 | LDHAP3          | 2  | 41819747  | 41820754  | processed_pseudogene                   | 85,78 | 0        |
| ENSG00000234292 | ENSG00000234292 | 5  | 91280097  | 91281142  | lincRNA                                | 85,70 | 0        |
| ENSG00000213753 | CENPBD1P1       | 19 | 58573503  | 58599801  | transcribed_processed_<br>pseudogene   | 85,62 | 0        |
| ENSG00000268575 | ENSG00000268575 | 1  | 1702736   | 1737688   | processed_transcript                   | 85,60 | 0        |
| ENSG00000267735 | ENSG00000267735 | 19 | 12880969  | 12884088  | antisense                              | 85,36 | 0        |
| ENSG00000235884 | LINC00941       | 12 | 30795681  | 30802711  | lincRNA                                | 84,90 | 0        |
| ENSG00000276855 | ENSG00000276855 | 17 | 15789016  | 15789705  | lincRNA                                | 84,60 | 0        |

|                 |                 |    |           |           |                                    |       |           |
|-----------------|-----------------|----|-----------|-----------|------------------------------------|-------|-----------|
| ENSG00000259945 | ENSG00000259945 | 16 | 67542123  | 67542963  | antisense                          | 84,60 | 0         |
| ENSG00000272558 | ENSG00000272558 | 6  | 25983812  | 25999167  | antisense                          | 84,20 | 0         |
| ENSG00000226235 | LEMD1-AS1       | 1  | 205373252 | 205387440 | antisense                          | 84,20 | 0         |
| ENSG00000232358 | ENSG00000232358 | 20 | 50999370  | 51010019  | antisense                          | 84,10 | 0         |
| ENSG00000261687 | ENSG00000261687 | 15 | 43184079  | 43185141  | antisense                          | 83,80 | 0         |
| ENSG00000269386 | RAB11B-AS1      | 19 | 8374373   | 8390685   | antisense                          | 83,60 | 0         |
| ENSG00000238164 | ENSG00000238164 | 1  | 2549920   | 2557031   | antisense                          | 83,40 | 0         |
| ENSG00000235609 | ENSG00000235609 | 21 | 14818843  | 15014430  | lincRNA                            | 83,20 | 0         |
| ENSG00000234203 | ENSG00000234203 | 17 | 4972851   | 4974681   | antisense                          | 83,20 | 0         |
| ENSG00000235448 | LURAP1L-AS1     | 9  | 12700100  | 12814345  | antisense                          | 83,20 | 0         |
| ENSG00000253981 | ALG1L13P        | 8  | 8236003   | 8244667   | transcribed_unprocessed_pseudogene | 83,00 | 0         |
| ENSG00000173727 | ENSG00000173727 | 11 | 65455258  | 65466720  | lincRNA                            | 82,96 | 0         |
| ENSG00000205790 | DPP9-AS1        | 19 | 4679282   | 4685948   | antisense                          | 82,92 | 0         |
| ENSG00000231013 | ENSG00000231013 | 2  | 119476448 | 119487346 | antisense                          | 82,70 | 0         |
| ENSG00000259096 | FAM35CP         | 14 | 87952527  | 87955203  | processed_pseudogene               | 82,60 | 0         |
| ENSG00000254479 | SLC25A1P1       | 11 | 85934737  | 85935663  | processed_pseudogene               | 82,60 | 0,2161218 |
| ENSG00000260276 | ENSG00000260276 | 16 | 8848105   | 8860456   | antisense                          | 82,36 | 0         |
| ENSG00000260266 | ENSG00000260266 | 15 | 74350768  | 74364620  | transcribed_processed_pseudogene   | 82,20 | 0         |
| ENSG00000100058 | CRYBB2P1        | 22 | 25448105  | 25520854  | transcribed_unprocessed_pseudogene | 82,06 | 0         |
| ENSG00000230715 | ENSG00000230715 | 7  | 128652841 | 128653243 | processed_pseudogene               | 81,90 | 0         |
| ENSG00000257616 | ENSG00000257616 | 12 | 52730425  | 52732865  | processed_pseudogene               | 81,83 | 0         |
| ENSG00000246067 | RAB30-AS1       | 11 | 83072066  | 83106719  | lincRNA                            | 81,83 | 0         |
| ENSG00000228887 | EEF1DP1         | 19 | 14070342  | 14071237  | processed_pseudogene               | 81,65 | 0         |
| ENSG00000254607 | ENSG00000254607 | 11 | 126652852 | 126682104 | antisense                          | 81,60 | 0         |
| ENSG00000182109 | ENSG00000182109 | 1  | 39522280  | 39546187  | antisense                          | 81,50 | 0         |
| ENSG00000261455 | LINC01003       | 7  | 152463786 | 152465549 | lincRNA                            | 81,10 | 0         |
| ENSG00000254285 | KRT8P3          | 8  | 61578220  | 61579668  | processed_pseudogene               | 80,91 | 0         |
| ENSG00000236540 | ENSG00000236540 | 22 | 20058030  | 20070569  | antisense                          | 80,70 | 0         |
| ENSG00000249193 | HSPD1P5         | 4  | 144845625 | 144847344 | processed_pseudogene               | 80,70 | 0         |
| ENSG00000233833 | ETF1P3          | X  | 65794345  | 65795835  | processed_pseudogene               | 80,70 | 0         |
| ENSG00000260894 | ENSG00000260894 | 16 | 67542304  | 67542572  | antisense                          | 80,60 | 0         |
| ENSG00000273036 | FAM95C          | 9  | 38540567  | 38545372  | lincRNA                            | 80,60 | 0         |
| ENSG00000269378 | ITGB1P1         | 19 | 14621634  | 14622242  | processed_pseudogene               | 80,36 | 0         |
| ENSG00000280007 | ENSG00000280007 | 22 | 18110759  | 18131154  | antisense                          | 80,30 | 0         |
| ENSG00000245958 | ENSG00000245958 | 4  | 119454791 | 119552025 | transcribed_unprocessed_pseudogene | 80,20 | 0         |
| ENSG00000269968 | ENSG00000269968 | 12 | 6537794   | 6538370   | antisense                          | 79,94 | 0         |
| ENSG00000230918 | ENSG00000230918 | 2  | 162073256 | 162075169 | antisense                          | 79,50 | 0         |
| ENSG00000240809 | ENSG00000240809 | 3  | 76434018  | 76435428  | processed_pseudogene               | 79,31 | 0         |
| ENSG00000249986 | YWHAQP6         | 3  | 141600276 | 141600579 | processed_pseudogene               | 79,30 | 0,2161218 |
| ENSG00000215049 | PRDX2P1         | 13 | 30296147  | 30296735  | processed_pseudogene               | 79,18 | 2,95E-02  |
| ENSG00000237264 | FTH1P11         | 8  | 81521682  | 81522232  | processed_pseudogene               | 79,10 | 0         |
| ENSG00000215447 | ENSG00000215447 | 21 | 45288052  | 45291738  | processed_transcript               | 78,46 | 0         |
| ENSG00000235298 | ENSG00000235298 | 9  | 83972233  | 83975777  | antisense                          | 78,45 | 0         |
| ENSG00000245571 | ENSG00000245571 | 11 | 59130133  | 59143015  | lincRNA                            | 78,40 | 0         |
| ENSG00000255394 | C8orf49         | 8  | 11761256  | 11763223  | lincRNA                            | 78,40 | 0         |
| ENSG00000242140 | ENSG00000242140 | 3  | 181146233 | 181146463 | processed_pseudogene               | 78,36 | 0         |
| ENSG00000243679 | ENSG00000243679 | 7  | 128653969 | 128654722 | processed_pseudogene               | 78,21 | 0         |
| ENSG00000236349 | SUCLG2P2        | 12 | 94548241  | 94549536  | processed_pseudogene               | 78,14 | 0         |
| ENSG00000213569 | ENSG00000213569 | X  | 107131659 | 107132269 | processed_pseudogene               | 78,05 | 0         |
| ENSG00000261759 | ENSG00000261759 | 16 | 19119976  | 19121629  | antisense                          | 78,00 | 0         |
| ENSG00000237499 | ENSG00000237499 | 6  | 137823673 | 137868233 | antisense                          | 78,00 | 0         |
| ENSG00000254400 | ENSG00000254400 | 11 | 6603642   | 6604420   | antisense                          | 77,96 | 0         |
| ENSG00000250548 | ENSG00000250548 | 14 | 61556313  | 61570653  | lincRNA                            | 77,80 | 0         |
| ENSG00000206337 | HCP5            | 6  | 31400702  | 31477506  | sense_overlapping                  | 77,80 | 0         |
| ENSG00000213409 | C1QBPP2         | 11 | 66761575  | 66762399  | processed_pseudogene               | 77,60 | 0         |
| ENSG00000258660 | ENSG00000258660 | 14 | 73698103  | 73700351  | antisense                          | 77,27 | 0         |
| ENSG00000232931 | LINC00342       | 2  | 95807118  | 95816215  | lincRNA                            | 77,00 | 0         |



|                 |                 |    |           |           |                                    |       |           |
|-----------------|-----------------|----|-----------|-----------|------------------------------------|-------|-----------|
| ENSG00000231700 | ENSG00000231700 | 1  | 157709086 | 157709643 | processed_pseudogene               | 76,80 | 0         |
| ENSG00000229036 | VDAC1P8         | 6  | 143490424 | 143506406 | transcribed_processed_pseudogene   | 76,60 | 0         |
| ENSG00000251615 | ENSG00000251615 | 4  | 8355090   | 8358338   | lincRNA                            | 76,50 | 0         |
| ENSG00000272030 | ENSG00000272030 | 1  | 153631438 | 153634397 | antisense                          | 76,50 | 0         |
| ENSG00000179611 | DGKZP1          | 13 | 43968424  | 43971199  | processed_pseudogene               | 76,43 | 0         |
| ENSG00000275888 | ENSG00000275888 | 17 | 82244770  | 82245591  | antisense                          | 76,38 | 0         |
| ENSG00000260349 | ENSG00000260349 | 16 | 9105834   | 9107174   | antisense                          | 76,33 | 0         |
| ENSG00000269929 | ENSG00000269929 | 9  | 94176458  | 94177892  | lincRNA                            | 76,30 | 0         |
| ENSG00000236686 | BZW1P1          | 3  | 172425850 | 172427089 | processed_pseudogene               | 76,23 | 0         |
| ENSG00000235912 | ENSG00000235912 | 1  | 27649419  | 27649610  | processed_pseudogene               | 76,23 | 0         |
| ENSG00000254615 | ENSG00000254615 | 8  | 106270144 | 106272899 | lincRNA                            | 76,09 | 0         |
| ENSG00000198658 | ABHD17A1        | 1  | 148146395 | 148149566 | unprocessed_pseudogene             | 75,70 | 0         |
| ENSG00000268292 | ENSG00000268292 | 22 | 20064552  | 20065705  | antisense                          | 75,67 | 0         |
| ENSG00000203999 | LINC01270       | 20 | 50292720  | 50314922  | lincRNA                            | 75,50 | 0         |
| ENSG00000234629 | WDR82P1         | 3  | 94937086  | 94938024  | processed_pseudogene               | 75,33 | 0         |
| ENSG00000226200 | SGMS1-AS1       | 10 | 50624951  | 50641451  | antisense                          | 75,23 | 0         |
| ENSG00000240477 | ENSG00000240477 | 3  | 150050729 | 150051456 | processed_pseudogene               | 75,17 | 0         |
| ENSG00000259051 | HNRNPUP1        | 14 | 43300263  | 43300595  | processed_pseudogene               | 74,78 | 0         |
| ENSG00000268636 | ENSG00000268636 | 19 | 49625994  | 49626439  | antisense                          | 74,40 | 0         |
| ENSG00000220494 | YAP1P1          | 6  | 147406889 | 147408281 | processed_pseudogene               | 74,20 | 1,40E-02  |
| ENSG00000268555 | ENSG00000268555 | 19 | 21570822  | 21587322  | lincRNA                            | 74,00 | 0         |
| ENSG00000269886 | ENSG00000269886 | 3  | 9812762   | 9813097   | antisense                          | 74,00 | 0         |
| ENSG00000258920 | FOXN3-AS1       | 14 | 89417354  | 89419793  | antisense                          | 73,70 | 0         |
| ENSG00000272462 | ENSG00000272462 | 6  | 25992662  | 26001775  | lincRNA                            | 73,70 | 0         |
| ENSG00000217241 | CBX3P9          | 6  | 116453014 | 116453565 | processed_pseudogene               | 73,65 | 0         |
| ENSG00000266208 | ENSG00000266208 | 17 | 40360655  | 40364693  | antisense                          | 73,60 | 0         |
| ENSG00000263219 | RYKP1           | 17 | 4222091   | 4223828   | processed_pseudogene               | 73,53 | 0         |
| ENSG00000248930 | ENSG00000248930 | 5  | 73020700  | 73021279  | processed_pseudogene               | 73,46 | 0         |
| ENSG00000215908 | CROCCP2         | 1  | 16618969  | 16644683  | transcribed_unprocessed_pseudogene | 73,40 | 0         |
| ENSG00000256940 | ENSG00000256940 | 11 | 64245964  | 64248217  | antisense                          | 73,20 | 0         |
| ENSG00000248866 | USP46-AS1       | 4  | 52659406  | 52661668  | lincRNA                            | 73,20 | 0         |
| ENSG00000275807 | ENSG00000275807 | 16 | 28822431  | 28823969  | antisense                          | 73,15 | 0         |
| ENSG00000272661 | ENSG00000272661 | 7  | 151240399 | 151240972 | antisense                          | 73,10 | 0         |
| ENSG00000260549 | MT1L            | 16 | 56617476  | 56618818  | unitary_pseudogene                 | 73,00 | 0         |
| ENSG00000258441 | LINC00641       | 14 | 21200079  | 21206900  | processed_transcript               | 72,86 | 0         |
| ENSG00000267244 | ENSG00000267244 | 19 | 1822089   | 1824542   | processed_transcript               | 72,80 | 0         |
| ENSG00000240854 | ENSG00000240854 | 3  | 132175402 | 132176711 | processed_pseudogene               | 72,79 | 0         |
| ENSG00000277938 | ENSG00000277938 | 20 | 25229150  | 25231933  | lincRNA                            | 72,71 | 0         |
| ENSG00000277749 | ENSG00000277749 | 15 | 74311516  | 74319688  | antisense                          | 72,60 | 1,40E-02  |
| ENSG00000231340 | ACTG1P10        | X  | 53142832  | 53143913  | processed_pseudogene               | 72,60 | 7,06E-02  |
| ENSG00000255959 | ENSG00000255959 | 11 | 60835996  | 60842965  | antisense                          | 72,57 | 0         |
| ENSG00000230844 | ZNF674-AS1      | X  | 46545493  | 46548408  | lincRNA                            | 72,52 | 0         |
| ENSG00000228318 | ENSG00000228318 | 21 | 41441056  | 41445708  | antisense                          | 72,40 | 0         |
| ENSG00000205485 | ENSG00000205485 | 7  | 76549360  | 76627982  | transcribed_unprocessed_pseudogene | 72,31 | 0         |
| ENSG00000226786 | ENSG00000226786 | 6  | 19534944  | 19839080  | antisense                          | 72,30 | 0         |
| ENSG00000183929 | DUSP5P1         | 1  | 228650241 | 228651379 | processed_pseudogene               | 72,00 | 0         |
| ENSG00000188856 | RPSAP47         | 8  | 80558870  | 80559757  | processed_pseudogene               | 71,89 | 0         |
| ENSG00000196696 | ENSG00000196696 | 16 | 69976297  | 70065948  | processed_transcript               | 71,60 | 0         |
| ENSG00000262712 | ENSG00000262712 | 16 | 4335870   | 4337818   | sense_intronic                     | 71,50 | 0         |
| ENSG00000229273 | ENSG00000229273 | 9  | 39809562  | 39810019  | processed_pseudogene               | 71,40 | 0         |
| ENSG00000234925 | ATP5HP4         | 12 | 68642519  | 68642993  | processed_pseudogene               | 71,14 | 0         |
| ENSG00000253173 | ENSG00000253173 | 8  | 70103798  | 70104179  | processed_pseudogene               | 71,09 | 0         |
| ENSG00000272341 | ENSG00000272341 | 6  | 16764346  | 16766883  | lincRNA                            | 71,08 | 0         |
| ENSG00000280852 | ENSG00000280852 | 17 | 60101759  | 60102919  | transcribed_processed_pseudogene   | 71,00 | 0         |
| ENSG00000236680 | ENSG00000236680 | 9  | 19026892  | 19028129  | processed_pseudogene               | 71,00 | 0,1217903 |
| ENSG00000271533 | ENSG00000271533 | X  | 74209976  | 74213660  | sense_intronic                     | 71,00 | 0         |

|                 |                 |    |           |           |                                    |       |           |
|-----------------|-----------------|----|-----------|-----------|------------------------------------|-------|-----------|
| ENSG00000256167 | ATF4P4          | 11 | 113789231 | 113791366 | transcribed_processed_pseudogene   | 70,98 | 0         |
| ENSG00000217950 | ENSG00000217950 | 2  | 131442644 | 131444587 | processed_pseudogene               | 70,89 | 0         |
| ENSG00000213131 | YWHAZP4         | 6  | 127355756 | 127356789 | processed_pseudogene               | 70,68 | 0         |
| ENSG00000230710 | LINC00332       | 13 | 40181809  | 40189028  | lincRNA                            | 70,60 | 0         |
| ENSG00000254023 | PKMP4           | 8  | 75376709  | 75377014  | processed_pseudogene               | 70,60 | 0         |
| ENSG00000226752 | PSMD5-AS1       | 9  | 120824828 | 120854385 | antisense                          | 70,59 | 0         |
| ENSG00000213212 | NCLP1           | 9  | 136812788 | 136815536 | processed_pseudogene               | 70,55 | 3,30E-03  |
| ENSG00000243613 | ENSG00000243613 | 1  | 153746851 | 153751227 | antisense                          | 70,45 | 0         |
| ENSG00000245149 | RNF139-AS1      | 8  | 124462485 | 124474576 | lincRNA                            | 70,20 | 0         |
| ENSG00000234793 | ENSG00000234793 | 2  | 241754793 | 241755740 | antisense                          | 70,20 | 0         |
| ENSG00000258301 | ENSG00000258301 | 14 | 76781733  | 76786724  | lincRNA                            | 70,12 | 0         |
| ENSG00000215769 | ENSG00000215769 | 17 | 64749663  | 64781707  | processed_transcript               | 70,10 | 0         |
| ENSG00000272758 | ENSG00000272758 | 3  | 122416207 | 122443180 | antisense                          | 70,00 | 0         |
| ENSG00000229867 | STEAP3-AS1      | 2  | 119244422 | 119249071 | antisense                          | 69,90 | 0         |
| ENSG00000261534 | ENSG00000261534 | 9  | 121815674 | 121819452 | sense_overlapping                  | 69,80 | 0         |
| ENSG00000224908 | TIMM8BP2        | X  | 134166682 | 134166932 | processed_pseudogene               | 69,80 | 0         |
| ENSG00000218537 | MIF-AS1         | 22 | 23894426  | 23898930  | antisense                          | 69,58 | 0         |
| ENSG00000255443 | ENSG00000255443 | 11 | 35210343  | 35214985  | antisense                          | 69,50 | 0         |
| ENSG00000270670 | ENSG00000270670 | 10 | 89837612  | 89839334  | processed_pseudogene               | 69,50 | 0         |
| ENSG00000253570 | RNF5P1          | 8  | 38600661  | 38601200  | processed_pseudogene               | 69,37 | 0         |
| ENSG00000239223 | RPL34P31        | 17 | 27274107  | 27274477  | processed_pseudogene               | 69,36 | 0         |
| ENSG00000253683 | ENSG00000253683 | 5  | 172656522 | 172656713 | processed_pseudogene               | 69,32 | 0         |
| ENSG00000269834 | ZNF528-AS1      | 19 | 52388842  | 52397766  | processed_transcript               | 69,13 | 0         |
| ENSG00000236565 | HNRNPA3P5       | 13 | 65787932  | 65788764  | processed_pseudogene               | 68,96 | 0         |
| ENSG00000266933 | ENSG00000266933 | 19 | 490046    | 507833    | antisense                          | 68,80 | 0         |
| ENSG00000231468 | PRDX3P2         | 1  | 28526318  | 28527227  | processed_pseudogene               | 68,60 | 0,2161218 |
| ENSG00000217130 | ENSG00000217130 | 6  | 34744176  | 34744673  | processed_pseudogene               | 68,53 | 0         |
| ENSG00000262879 | ENSG00000262879 | 17 | 46984045  | 47100323  | processed_transcript               | 68,40 | 0         |
| ENSG00000272669 | ENSG00000272669 | 22 | 38742625  | 38743115  | antisense                          | 68,30 | 0         |
| ENSG00000187481 | HSD3BP1         | 1  | 119467221 | 119473803 | unprocessed_pseudogene             | 68,20 | 0         |
| ENSG00000241318 | WDR82P2         | 1  | 91534666  | 91535593  | processed_pseudogene               | 68,20 | 0         |
| ENSG00000170161 | ENSG00000170161 | 9  | 62897449  | 62900104  | lincRNA                            | 68,08 | 0         |
| ENSG00000234661 | CHL1-AS1        | 3  | 363370    | 385795    | antisense                          | 68,00 | 0         |
| ENSG00000269837 | IPO5P1          | 19 | 23255053  | 23257939  | transcribed_processed_pseudogene   | 67,86 | 0         |
| ENSG00000244479 | OR2A1-AS1       | 7  | 144251264 | 144356181 | antisense                          | 67,40 | 0         |
| ENSG00000260441 | ENSG00000260441 | 16 | 68256162  | 68260443  | antisense                          | 67,30 | 0         |
| ENSG00000228360 | ENSG00000228360 | 7  | 139227537 | 139227828 | processed_pseudogene               | 67,30 | 7,06E-02  |
| ENSG00000227183 | HDFGP1          | X  | 131646639 | 131646890 | processed_pseudogene               | 67,30 | 0         |
| ENSG00000263050 | ENSG00000263050 | 17 | 2043475   | 2044968   | lincRNA                            | 67,27 | 0         |
| ENSG00000257354 | ENSG00000257354 | 12 | 62602752  | 62622213  | lincRNA                            | 67,27 | 0         |
| ENSG00000272941 | ENSG00000272941 | 7  | 135168403 | 135169547 | antisense                          | 67,17 | 0         |
| ENSG00000236526 | ENSG00000236526 | 20 | 11909404  | 11918677  | antisense                          | 67,14 | 0         |
| ENSG00000259540 | ENSG00000259540 | 15 | 100558677 | 100559798 | antisense                          | 67,10 | 7,06E-02  |
| ENSG00000186715 | MST1L           | 1  | 16754910  | 16770237  | transcribed_unprocessed_pseudogene | 67,10 | 0         |
| ENSG00000267397 | ENSG00000267397 | 18 | 35716370  | 35717978  | lincRNA                            | 67,00 | 0         |
| ENSG00000260934 | ENSG00000260934 | 16 | 19501689  | 19502286  | antisense                          | 67,00 | 0         |
| ENSG00000203387 | ENSG00000203387 | 2  | 228352120 | 228353215 | processed_pseudogene               | 67,00 | 0         |
| ENSG00000274985 | PTCHD3P1        | 10 | 29421476  | 29422012  | unprocessed_pseudogene             | 66,92 | 0         |
| ENSG00000277142 | LINC00235       | 16 | 525155    | 527407    | lincRNA                            | 66,90 | 0         |
| ENSG00000260742 | ENSG00000260742 | 2  | 181887851 | 181891663 | antisense                          | 66,90 | 0         |
| ENSG00000233695 | GAS6-AS1        | 13 | 113815630 | 113845744 | antisense                          | 66,88 | 0         |
| ENSG00000238273 | ENSG00000238273 | 2  | 105363038 | 105378839 | antisense                          | 66,82 | 0         |
| ENSG00000230262 | MIRLET7DHG      | 9  | 94176602  | 94204568  | lincRNA                            | 66,80 | 0         |
| ENSG00000272994 | ENSG00000272994 | 2  | 105334027 | 105337475 | lincRNA                            | 66,70 | 0         |
| ENSG00000254461 | ENSG00000254461 | 11 | 66259567  | 66261834  | antisense                          | 66,40 | 0         |
| ENSG00000204791 | ENSG00000204791 | 8  | 144049129 | 144051522 | antisense                          | 66,40 | 0         |

|                 |                 |    |           |           |                                    |       |          |
|-----------------|-----------------|----|-----------|-----------|------------------------------------|-------|----------|
| ENSG00000247516 | MIR4458HG       | 5  | 8450743   | 8463095   | lincRNA                            | 66,31 | 0        |
| ENSG00000264475 | ENSG00000264475 | 18 | 7076817   | 7080123   | antisense                          | 66,20 | 0        |
| ENSG00000257086 | ENSG00000257086 | 11 | 64246939  | 64249494  | lincRNA                            | 66,20 | 0        |
| ENSG00000204049 | ENSG00000204049 | 10 | 77866875  | 77869610  | antisense                          | 66,18 | 0        |
| ENSG00000236054 | ENSG00000236054 | 22 | 32583300  | 32584204  | antisense                          | 66,10 | 0        |
| ENSG00000241684 | ADAMTS9-AS2     | 3  | 64684909  | 65011468  | antisense                          | 65,92 | 0        |
| ENSG00000232004 | CAP1P2          | 10 | 43604843  | 43606251  | processed_pseudogene               | 65,87 | 0        |
| ENSG00000219891 | ZSCAN12P1       | 6  | 28091154  | 28093664  | transcribed_unprocessed_pseudogene | 65,85 | 0        |
| ENSG00000234585 | CCT6P3          | 7  | 65038354  | 65074713  | transcribed_unprocessed_pseudogene | 65,80 | 0        |
| ENSG00000234912 | SNHG20          | 17 | 77086716  | 77094990  | processed_transcript               | 65,50 | 0        |
| ENSG00000259933 | ENSG00000259933 | 16 | 2091436   | 2095433   | sense_overlapping                  | 65,50 | 0        |
| ENSG00000217643 | PTGES3P2        | 2  | 25822469  | 25822950  | processed_pseudogene               | 65,50 | 1,40E-02 |
| ENSG00000232727 | YWHAEP1         | 7  | 64433830  | 64434592  | processed_pseudogene               | 65,38 | 0        |
| ENSG00000259516 | ANP32AP1        | 15 | 35181799  | 35238197  | transcribed_processed_pseudogene   | 65,37 | 0        |
| ENSG00000242516 | LINC00960       | 3  | 75672391  | 75679303  | lincRNA                            | 65,32 | 0        |
| ENSG00000213480 | ENSG00000213480 | 4  | 121369433 | 121370345 | processed_pseudogene               | 65,27 | 0        |
| ENSG00000229132 | EIF4A1P10       | X  | 92113246  | 92114461  | processed_pseudogene               | 65,22 | 0        |
| ENSG00000227825 | SLC9A7P1        | 12 | 98453835  | 98457145  | transcribed_processed_pseudogene   | 65,10 | 0        |
| ENSG00000235251 | ENSG00000235251 | 1  | 87044935  | 87045871  | processed_pseudogene               | 65,10 | 1,40E-02 |
| ENSG00000269069 | ENSG00000269069 | 19 | 40023384  | 40025502  | processed_pseudogene               | 65,09 | 0        |
| ENSG00000247982 | LINC00926       | 15 | 57300365  | 57307769  | lincRNA                            | 65,00 | 0        |
| ENSG00000273247 | ENSG00000273247 | 4  | 139411927 | 139454034 | antisense                          | 64,83 | 0        |
| ENSG00000237975 | FLG-AS1         | 1  | 152168125 | 152445456 | antisense                          | 64,75 | 0        |
| ENSG00000247679 | ENSG00000247679 | 5  | 177611253 | 177619754 | antisense                          | 64,67 | 0        |
| ENSG00000225756 | DBH-AS1         | 9  | 133654586 | 133657313 | antisense                          | 64,60 | 0        |
| ENSG00000108785 | HSD17B1P1       | 17 | 42546764  | 42548706  | unprocessed_pseudogene             | 64,30 | 0        |
| ENSG00000230140 | ENSG00000230140 | 2  | 100972648 | 100977161 | antisense                          | 64,19 | 0        |
| ENSG00000259408 | ENSG00000259408 | 15 | 33851785  | 33856809  | antisense                          | 64,18 | 0        |
| ENSG00000248546 | ANP32C          | 4  | 164197007 | 164197711 | processed_pseudogene               | 64,10 | 0        |
| ENSG00000197927 | C2orf27A        | 2  | 131722375 | 131767404 | transcribed_unprocessed_pseudogene | 64,05 | 0        |
| ENSG00000216657 | GLRX3P2         | 6  | 3978062   | 3979099   | processed_pseudogene               | 63,96 | 0        |
| ENSG00000265519 | ENSG00000265519 | 17 | 15787787  | 15788205  | lincRNA                            | 63,80 | 0        |
| ENSG00000224081 | LINC01057       | 1  | 94613814  | 94855426  | transcribed_processed_pseudogene   | 63,74 | 0        |
| ENSG00000233441 | CYP2AB1P        | 3  | 183895900 | 183910936 | transcribed_unprocessed_pseudogene | 63,70 | 0        |
| ENSG00000262222 | ENSG00000262222 | 16 | 10940719  | 10943021  | antisense                          | 63,60 | 0        |
| ENSG00000249474 | ENSG00000249474 | 3  | 101823793 | 101824998 | antisense                          | 63,60 | 0        |
| ENSG00000223459 | TCAF1P1         | 7  | 143598040 | 143604839 | unprocessed_pseudogene             | 63,60 | 0        |
| ENSG00000223401 | ENSG00000223401 | 3  | 187743686 | 187745420 | lincRNA                            | 63,40 | 0        |
| ENSG00000263072 | ZNF213-AS1      | 16 | 3110460   | 3134882   | antisense                          | 63,35 | 0        |
| ENSG00000229268 | PES1P2          | 9  | 13986175  | 13987909  | processed_pseudogene               | 63,18 | 0        |
| ENSG00000223901 | ENSG00000223901 | 21 | 46220269  | 46225364  | antisense                          | 63,10 | 0        |
| ENSG00000249593 | ENSG00000249593 | 5  | 139012647 | 139051203 | antisense                          | 62,94 | 0        |
| ENSG00000228328 | ENSG00000228328 | X  | 68070520  | 68071767  | processed_pseudogene               | 62,85 | 0        |
| ENSG00000185485 | SDHAP1          | 3  | 195959748 | 195990318 | transcribed_unprocessed_pseudogene | 62,24 | 0        |
| ENSG00000258056 | ENSG00000258056 | 12 | 55729104  | 55730852  | antisense                          | 62,20 | 0        |
| ENSG00000235236 | ENSG00000235236 | 3  | 48979918  | 48983985  | antisense                          | 62,15 | 0        |
| ENSG00000258509 | ENSG00000258509 | 14 | 44887434  | 44887741  | processed_pseudogene               | 62,00 | 7,06E-02 |
| ENSG00000223612 | ENSG00000223612 | 1  | 145233001 | 145233519 | processed_pseudogene               | 61,92 | 0        |
| ENSG00000226067 | LINC00623       | 1  | 120913275 | 121009291 | lincRNA                            | 61,90 | 0        |
| ENSG00000234614 | ENSG00000234614 | 1  | 151841877 | 151850385 | antisense                          | 61,90 | 0        |
| ENSG00000255725 | TDGP1           | 12 | 25803298  | 25804526  | processed_pseudogene               | 61,90 | 0        |

|                 |                 |    |           |           |                                        |       |           |
|-----------------|-----------------|----|-----------|-----------|----------------------------------------|-------|-----------|
| ENSG00000230424 | ENSG00000230424 | 1  | 19210501  | 19240704  | antisense                              | 61,87 | 0         |
| ENSG00000260051 | ENSG00000260051 | 16 | 1451760   | 1452653   | antisense                              | 61,80 | 0         |
| ENSG00000236886 | ENSG00000236886 | 2  | 216694464 | 216994079 | antisense                              | 61,78 | 0         |
| ENSG00000184844 | CYCSP45         | X  | 153841251 | 153841565 | processed_pseudogene                   | 61,64 | 3,30E-03  |
| ENSG00000255173 | ENSG00000255173 | 11 | 65117157  | 65117458  | antisense                              | 61,60 | 0         |
| ENSG00000196566 | ENSG00000196566 | 10 | 87610163  | 87660003  | antisense                              | 61,50 | 0         |
| ENSG00000248323 | LUCAT1          | 5  | 91303029  | 91314402  | lincRNA                                | 61,40 | 0         |
| ENSG00000272100 | ENSG00000272100 | 1  | 52353487  | 52353877  | antisense                              | 61,12 | 0         |
| ENSG00000213866 | YBX1P10         | 9  | 35971344  | 35972318  | processed_pseudogene                   | 61,05 | 0         |
| ENSG00000220378 | KRT8P42         | 6  | 134296997 | 134298695 | processed_pseudogene                   | 60,90 | 0         |
| ENSG00000279833 | ENSG00000279833 | 22 | 39133090  | 39136760  | antisense                              | 60,77 | 0         |
| ENSG00000237931 | CLIC4P3         | X  | 41076999  | 41077750  | processed_pseudogene                   | 60,70 | 0         |
| ENSG00000259952 | ENSG00000259952 | 16 | 29806496  | 29807732  | antisense                              | 60,66 | 0         |
| ENSG00000263069 | ENSG00000263069 | 17 | 80351828  | 80415168  | antisense                              | 60,63 | 0         |
| ENSG00000228192 | ENSG00000228192 | 1  | 42834681  | 42846422  | antisense                              | 60,62 | 0         |
| ENSG00000260912 | ENSG00000260912 | 9  | 19453209  | 19455173  | sense_overlapping                      | 60,59 | 0         |
| ENSG00000266036 | ENSG00000266036 | 17 | 74747319  | 74748912  | antisense                              | 60,50 | 0         |
| ENSG00000259948 | ENSG00000259948 | 15 | 89201091  | 89201768  | processed_pseudogene                   | 60,47 | 0         |
| ENSG00000236456 | ENSG00000236456 | 20 | 34245953  | 34246537  | processed_pseudogene                   | 60,36 | 0         |
| ENSG00000237732 | ENSG00000237732 | 2  | 222318275 | 222352989 | transcribed_unprocess<br>ed_pseudogene | 60,30 | 0         |
| ENSG00000278212 | MAFIP           | X  | 11153858  | 11159013  | unprocessed_pseudoge<br>ne             | 60,30 | 0         |
| ENSG00000225465 | RFPL1S          | 22 | 29436534  | 29478175  | antisense                              | 60,25 | 0         |
| ENSG00000259460 | ENSG00000259460 | 15 | 37099339  | 37100173  | antisense                              | 60,20 | 0         |
| ENSG00000274021 | ENSG00000274021 | 12 | 89351015  | 89353271  | lincRNA                                | 59,96 | 0         |
| ENSG00000250444 | CCT5P1          | 5  | 115512077 | 115513694 | processed_pseudogene                   | 59,88 | 0         |
| ENSG00000213774 | ENSG00000213774 | 2  | 7324748   | 7325062   | processed_pseudogene                   | 59,80 | 0         |
| ENSG00000268001 | CARD8-AS1       | 19 | 48255675  | 48258199  | antisense                              | 59,73 | 0         |
| ENSG00000263301 | ENSG00000263301 | 17 | 7439159   | 7443327   | antisense                              | 59,70 | 0         |
| ENSG00000256293 | ENSG00000256293 | 12 | 64338178  | 64338797  | processed_pseudogene                   | 59,69 | 0         |
| ENSG00000260917 | ENSG00000260917 | 10 | 112823490 | 112827726 | sense_overlapping                      | 59,55 | 0         |
| ENSG00000260367 | ENSG00000260367 | 16 | 28973962  | 28978824  | antisense                              | 59,54 | 0         |
| ENSG00000214820 | MPRIPP1         | 3  | 44579938  | 44581026  | processed_pseudogene                   | 59,14 | 0         |
| ENSG00000234684 | SDCBP2-AS1      | 20 | 1325405   | 1378734   | antisense                              | 59,05 | 0         |
| ENSG00000255921 | ENSG00000255921 | 12 | 24949163  | 24960158  | antisense                              | 59,00 | 0         |
| ENSG00000222032 | ENSG00000222032 | 2  | 237428920 | 237434822 | lincRNA                                | 59,00 | 0         |
| ENSG00000215146 | ENSG00000215146 | 10 | 42331866  | 42367974  | transcribed_unprocess<br>ed_pseudogene | 58,80 | 0         |
| ENSG00000271525 | ARF4P1          | 9  | 134078904 | 134079444 | processed_pseudogene                   | 58,79 | 0         |
| ENSG00000242479 | ENSG00000242479 | 3  | 142450102 | 142452149 | processed_pseudogene                   | 58,78 | 0         |
| ENSG00000268896 | ENSG00000268896 | 2  | 219547211 | 219547658 | antisense                              | 58,70 | 0         |
| ENSG00000231344 | ENSG00000231344 | 1  | 27739091  | 27739439  | processed_pseudogene                   | 58,60 | 0,2161218 |
| ENSG00000240731 | ENSG00000240731 | 1  | 1317581   | 1318689   | sense_intronic                         | 58,55 | 0         |
| ENSG00000251348 | HSPD1P11        | 5  | 95768999  | 95770700  | processed_pseudogene                   | 58,30 | 0         |
| ENSG00000232380 | ZDHC20P4        | 13 | 68985058  | 68986064  | processed_pseudogene                   | 58,20 | 0         |
| ENSG00000224897 | POT1-AS1        | 7  | 124929873 | 125179315 | antisense                              | 58,19 | 0         |
| ENSG00000272993 | ENSG00000272993 | 1  | 149845816 | 149846486 | lincRNA                                | 58,10 | 0         |
| ENSG00000213236 | YWHAZP2         | 2  | 126557435 | 126558162 | processed_pseudogene                   | 57,92 | 0         |
| ENSG00000246250 | ENSG00000246250 | 11 | 43829709  | 43880726  | antisense                              | 57,88 | 0         |
| ENSG00000229932 | YWHAZP3         | 10 | 23136924  | 23137661  | processed_pseudogene                   | 57,87 | 0         |
| ENSG00000269680 | ENSG00000269680 | 19 | 6748293   | 6751467   | antisense                              | 57,82 | 0         |
| ENSG00000219329 | ENSG00000219329 | 6  | 110923566 | 110924107 | processed_pseudogene                   | 57,80 | 7,06E-02  |
| ENSG00000240602 | AADACP1         | 3  | 151770428 | 151784894 | transcribed_unprocess<br>ed_pseudogene | 57,70 | 0         |
| ENSG00000235501 | ENSG00000235501 | 1  | 94927566  | 94963270  | antisense                              | 57,58 | 0         |
| ENSG00000274272 | ENSG00000274272 | 7  | 100572232 | 100578700 | processed_transcript                   | 57,30 | 0         |
| ENSG00000218226 | TATDN2P2        | 6  | 158609706 | 158621636 | processed_pseudogene                   | 57,30 | 0         |
| ENSG00000257702 | LBX2-AS1        | 2  | 74502595  | 74504678  | antisense                              | 57,30 | 0         |
| ENSG00000226419 | SLC16A1-AS1     | 1  | 112956415 | 113047055 | antisense                              | 57,22 | 0         |
| ENSG00000260521 | ENSG00000260521 | 15 | 94855474  | 94856914  | processed_pseudogene                   | 57,21 | 0         |

|                 |                 |    |           |           |                                        |       |          |
|-----------------|-----------------|----|-----------|-----------|----------------------------------------|-------|----------|
| ENSG00000278600 | ENSG00000278600 | 15 | 79920195  | 79922455  | sense_intronic                         | 57,20 | 0        |
| ENSG00000232952 | ENSG00000232952 | 1  | 105891739 | 105893517 | processed_pseudogene                   | 57,12 | 0        |
| ENSG00000269825 | ENSG00000269825 | 19 | 52650437  | 52653284  | sense_intronic                         | 57,08 | 0        |
| ENSG00000223343 | ENSG00000223343 | 3  | 48985049  | 48989988  | antisense                              | 57,07 | 0        |
| ENSG00000274602 | PI4KAP1         | 22 | 18533646  | 18577968  | transcribed_unprocess<br>ed_pseudogene | 57,06 | 0        |
| ENSG00000255734 | HNRNPABP1       | 12 | 10111738  | 10112471  | processed_pseudogene                   | 57,00 | 7,06E-02 |
| ENSG00000272767 | JMJD1C-AS1      | 10 | 63465229  | 63466563  | antisense                              | 57,00 | 0        |
| ENSG00000182796 | TMEM198B        | 12 | 55829745  | 55836246  | unitary_pseudogene                     | 56,89 | 0        |
| ENSG00000229647 | ENSG00000229647 | 2  | 207239650 | 207245887 | lincRNA                                | 56,65 | 0        |
| ENSG00000247049 | ENSG00000247049 | 5  | 181224646 | 181230685 | antisense                              | 56,41 | 0        |
| ENSG00000182873 | ENSG00000182873 | 1  | 2181794   | 2184389   | antisense                              | 56,30 | 0        |
| ENSG00000230956 | ENSG00000230956 | X  | 88096393  | 88097225  | processed_pseudogene                   | 56,26 | 0        |
| ENSG00000227934 | ENSG00000227934 | 1  | 231021611 | 231022183 | processed_pseudogene                   | 56,17 | 0        |
| ENSG00000253445 | ENSG00000253445 | 5  | 172690454 | 172697720 | antisense                              | 56,13 | 0        |
| ENSG00000254270 | ERHP1           | 7  | 139534240 | 139534549 | processed_pseudogene                   | 56,07 | 0        |
| ENSG00000258734 | ENSG00000258734 | 14 | 58827679  | 58828176  | processed_pseudogene                   | 56,07 | 0        |
| ENSG00000261324 | ENSG00000261324 | 12 | 14762504  | 14767931  | sense_overlapping                      | 55,70 | 0        |
| ENSG00000224057 | EGFR-AS1        | 7  | 55179750  | 55188934  | antisense                              | 55,70 | 0        |
| ENSG00000268530 | ENSG00000268530 | 19 | 48465593  | 48469693  | antisense                              | 55,69 | 0        |
| ENSG00000160766 | GBAP1           | 1  | 155213821 | 155227422 | transcribed_unprocess<br>ed_pseudogene | 55,60 | 0        |
| ENSG00000272768 | ENSG00000272768 | 7  | 44884953  | 44886393  | antisense                              | 55,50 | 0        |
| ENSG00000204622 | HLA-J           | 6  | 30005971  | 30009956  | transcribed_unprocess<br>ed_pseudogene | 55,30 | 0        |
| ENSG00000278831 | ENSG00000278831 | 10 | 124623353 | 124624079 | antisense                              | 55,13 | 0        |
| ENSG00000262877 | ENSG00000262877 | 17 | 81388126  | 81390256  | lincRNA                                | 55,10 | 0        |
| ENSG00000272078 | ENSG00000272078 | 1  | 10639241  | 10654333  | antisense                              | 55,00 | 0        |
| ENSG00000177337 | DLGAP1-AS1      | 18 | 3593732   | 3598352   | antisense                              | 54,90 | 0        |
| ENSG00000254964 | ENSG00000254964 | 11 | 62606161  | 62606405  | antisense                              | 54,90 | 0        |
| ENSG00000230079 | STK24P1         | X  | 136295690 | 136300298 | processed_pseudogene                   | 54,86 | 3,30E-03 |
| ENSG00000203497 | PDCD4-AS1       | 10 | 110869868 | 110872233 | antisense                              | 54,70 | 0        |
| ENSG00000267769 | ENSG00000267769 | 19 | 4454014   | 4455286   | antisense                              | 54,42 | 0        |
| ENSG00000248774 | ENSG00000248774 | 4  | 173322206 | 173329694 | antisense                              | 54,36 | 0        |
| ENSG00000271147 | ARMCX5-GPRASP2  | X  | 102599512 | 102714671 | processed_transcript                   | 54,30 | 0        |
| ENSG00000269148 | ENSG00000269148 | 19 | 45830164  | 45831108  | antisense                              | 54,19 | 0        |
| ENSG00000231329 | ENSG00000231329 | 6  | 139144204 | 139239653 | antisense                              | 54,18 | 0        |
| ENSG00000206149 | HERC2P9         | 15 | 28589492  | 28685264  | transcribed_unprocess<br>ed_pseudogene | 54,13 | 0        |
| ENSG00000229894 | ENSG00000229894 | 4  | 165277984 | 165279645 | processed_pseudogene                   | 54,10 | 0        |
| ENSG00000257576 | ENSG00000257576 | 12 | 56511002  | 56512703  | processed_pseudogene                   | 54,09 | 0        |
| ENSG00000267169 | ENSG00000267169 | 19 | 14137179  | 14171267  | antisense                              | 54,04 | 0        |
| ENSG00000131797 | CLUHP3          | 16 | 31700590  | 31711986  | transcribed_unprocess<br>ed_pseudogene | 54,00 | 0        |
| ENSG00000244926 | ALKBH3-AS1      | 11 | 43909292  | 43920944  | antisense                              | 54,00 | 0        |
| ENSG00000235651 | ENSG00000235651 | 2  | 135510546 | 135511943 | processed_pseudogene                   | 53,94 | 0        |
| ENSG00000225871 | ENSG00000225871 | 1  | 148435105 | 148436926 | processed_pseudogene                   | 53,92 | 0        |
| ENSG00000261396 | ENSG00000261396 | 16 | 67538557  | 67540106  | antisense                              | 53,90 | 0        |
| ENSG00000177738 | ENSG00000177738 | 5  | 43014414  | 43067419  | sense_overlapping                      | 53,90 | 0        |
| ENSG00000268282 | ENSG00000268282 | 19 | 53004040  | 53005150  | processed_pseudogene                   | 53,55 | 0        |
| ENSG00000183935 | HTR7P1          | 12 | 13000420  | 13004830  | transcribed_processed_<br>pseudogene   | 53,40 | 0        |
| ENSG00000226666 | HSPA9P1         | 2  | 221961737 | 221963765 | processed_pseudogene                   | 53,34 | 0        |
| ENSG00000269374 | ENSG00000269374 | 19 | 42485076  | 42485714  | processed_pseudogene                   | 53,26 | 0        |
| ENSG00000267387 | ENSG00000267387 | 19 | 10089032  | 10090377  | antisense                              | 53,24 | 0        |
| ENSG00000123870 | ZNF137P         | 19 | 52588505  | 52597345  | transcribed_unprocess<br>ed_pseudogene | 53,20 | 0        |
| ENSG00000236393 | ENSG00000236393 | X  | 40262917  | 40287720  | lincRNA                                | 53,20 | 0        |
| ENSG00000198857 | HSD3BP5         | 1  | 119601340 | 119609250 | transcribed_unprocess<br>ed_pseudogene | 53,10 | 0        |
| ENSG00000260285 | ENSG00000260285 | 14 | 103525010 | 103529072 | antisense                              | 53,00 | 0        |

|                 |                 |    |           |           |                                    |       |           |
|-----------------|-----------------|----|-----------|-----------|------------------------------------|-------|-----------|
| ENSG00000280798 | LINC00294       | 11 | 33076149  | 33079454  | lincRNA                            | 52,95 | 0         |
| ENSG00000273679 | ENSG00000273679 | 15 | 22371736  | 22373570  | processed_pseudogene               | 52,86 | 0         |
| ENSG00000232940 | HCG25           | 6  | 33249534  | 33254989  | antisense                          | 52,81 | 0         |
| ENSG00000179523 | EIF3J-AS1       | 15 | 44527257  | 44536923  | lincRNA                            | 52,76 | 0         |
| ENSG00000271980 | ENSG00000271980 | 5  | 10264597  | 10267146  | antisense                          | 52,73 | 0         |
| ENSG00000265254 | ENSG00000265254 | 17 | 28405240  | 28406796  | antisense                          | 52,60 | 0         |
| ENSG00000242349 | NPPA-AS1        | 1  | 11841017  | 11848079  | antisense                          | 52,60 | 0         |
| ENSG00000233098 | CCDC144NL-AS1   | 17 | 20868433  | 21002276  | antisense                          | 52,54 | 0         |
| ENSG00000236472 | ENSG00000236472 | 17 | 50135586  | 50146176  | antisense                          | 52,50 | 0         |
| ENSG00000214783 | POLR2J4         | 7  | 43940895  | 44019175  | processed_transcript               | 52,43 | 0         |
| ENSG00000238123 | MID1IP1-AS1     | X  | 38801568  | 38803883  | antisense                          | 52,30 | 0         |
| ENSG00000258646 | ENSG00000258646 | 14 | 75004719  | 75008481  | antisense                          | 52,27 | 0         |
| ENSG00000248223 | ENSG00000248223 | 5  | 17353910  | 17354899  | lincRNA                            | 52,08 | 0         |
| ENSG00000262454 | MIR193BHG       | 16 | 14301389  | 14326744  | lincRNA                            | 52,00 | 0         |
| ENSG00000223500 | ENSG00000223500 | 7  | 135128444 | 135129685 | processed_pseudogene               | 52,00 | 0         |
| ENSG00000225603 | ENSG00000225603 | 1  | 147050817 | 147052481 | processed_pseudogene               | 51,93 | 0         |
| ENSG00000222022 | ENSG00000222022 | 2  | 237421420 | 237425276 | lincRNA                            | 51,91 | 0         |
| ENSG00000253517 | XRCC6P4         | 8  | 62855068  | 62857134  | processed_pseudogene               | 51,88 | 0         |
| ENSG00000267580 | ENSG00000267580 | 19 | 33299934  | 33301168  | antisense                          | 51,70 | 0         |
| ENSG00000261635 | ENSG00000261635 | 15 | 36613474  | 36614198  | processed_pseudogene               | 51,62 | 0         |
| ENSG00000240370 | ENSG00000240370 | 12 | 6873389   | 6884741   | transcribed_processed_pseudogene   | 51,54 | 0         |
| ENSG00000270189 | ENSG00000270189 | X  | 53169097  | 53170914  | lincRNA                            | 51,50 | 0         |
| ENSG00000241170 | ENSG00000241170 | 11 | 74876286  | 74920022  | transcribed_processed_pseudogene   | 51,40 | 0         |
| ENSG00000229897 | SEPT7P7         | 9  | 98606833  | 98608133  | processed_pseudogene               | 51,28 | 0         |
| ENSG00000180867 | PDIA3P1         | 1  | 147178113 | 147179622 | processed_pseudogene               | 51,23 | 0         |
| ENSG00000267312 | ENSG00000267312 | 17 | 35459481  | 35460550  | processed_pseudogene               | 51,14 | 0         |
| ENSG00000248409 | ENSG00000248409 | 22 | 23392771  | 23393839  | unprocessed_pseudogene             | 51,10 | 0         |
| ENSG00000234160 | ENSG00000234160 | 9  | 37509150  | 37510299  | antisense                          | 51,10 | 0         |
| ENSG00000272600 | ENSG00000272600 | 22 | 20889206  | 20891214  | antisense                          | 51,06 | 0         |
| ENSG00000259314 | ENSG00000259314 | 15 | 90604225  | 90614558  | antisense                          | 50,91 | 0         |
| ENSG00000267125 | ENSG00000267125 | 19 | 1852382   | 1853622   | antisense                          | 50,91 | 0         |
| ENSG00000255320 | ENSG00000255320 | 11 | 66244840  | 66246239  | antisense                          | 50,80 | 0         |
| ENSG00000239653 | PSMD6-AS2       | 3  | 64004022  | 64012148  | antisense                          | 50,69 | 0         |
| ENSG00000275516 | ENSG00000275516 | 17 | 79952663  | 79952992  | antisense                          | 50,60 | 0         |
| ENSG00000280623 | PCAT14          | 22 | 23536881  | 23547797  | lincRNA                            | 50,50 | 0         |
| ENSG00000267493 | CIRBP-AS1       | 19 | 1267814   | 1270241   | antisense                          | 50,50 | 0         |
| ENSG00000277688 | ENSG00000277688 | 17 | 37609739  | 37613841  | antisense                          | 50,46 | 0         |
| ENSG00000254343 | ENSG00000254343 | 8  | 120052180 | 120056201 | lincRNA                            | 50,40 | 0         |
| ENSG00000237861 | ENSG00000237861 | 1  | 19722222  | 19722325  | processed_pseudogene               | 50,40 | 0         |
| ENSG00000215866 | LINC01356       | 1  | 112820170 | 112850643 | lincRNA                            | 50,30 | 0         |
| ENSG00000176700 | SCAND2P         | 15 | 84631451  | 84647478  | transcribed_unprocessed_pseudogene | 50,26 | 0         |
| ENSG00000263970 | ENSG00000263970 | 18 | 8406761   | 8406953   | antisense                          | 50,23 | 0         |
| ENSG00000267023 | LRR37A16P       | 17 | 68125777  | 68152468  | transcribed_unprocessed_pseudogene | 50,13 | 0         |
| ENSG00000248923 | MTND5P11        | 5  | 134924648 | 134926459 | processed_pseudogene               | 50,08 | 0,0358681 |
| ENSG00000203761 | MSTO2P          | 1  | 155745829 | 155750137 | unprocessed_pseudogene             | 49,92 | 0         |
| ENSG00000224687 | RASAL2-AS1      | 1  | 178091508 | 178093984 | lincRNA                            | 49,83 | 0         |
| ENSG00000267615 | ENSG00000267615 | 17 | 75943832  | 75945142  | antisense                          | 49,78 | 0         |
| ENSG00000254340 | ENSG00000254340 | 8  | 9141424   | 9145435   | antisense                          | 49,75 | 0         |
| ENSG00000258741 | ENSG00000258741 | 15 | 92715710  | 92734195  | transcribed_processed_pseudogene   | 49,68 | 0         |
| ENSG00000231588 | ENSG00000231588 | 10 | 50629532  | 50631075  | processed_pseudogene               | 49,62 | 0         |
| ENSG00000270012 | ENSG00000270012 | X  | 49273054  | 49275768  | lincRNA                            | 49,50 | 0         |
| ENSG00000225335 | ENSG00000225335 | 22 | 18076527  | 18078884  | antisense                          | 49,38 | 0         |
| ENSG00000267321 | ENSG00000267321 | 17 | 35568120  | 35574792  | lincRNA                            | 49,30 | 0         |
| ENSG00000232533 | ENSG00000232533 | 7  | 143379692 | 143380495 | antisense                          | 49,21 | 0         |

|                 |                 |    |           |           |                                    |       |          |
|-----------------|-----------------|----|-----------|-----------|------------------------------------|-------|----------|
| ENSG00000215386 | MIR99AHG        | 21 | 16070522  | 16627397  | lincRNA                            | 49,12 | 0        |
| ENSG00000227262 | HCG4B           | 6  | 29925983  | 29926973  | unprocessed_pseudogene             | 49,10 | 0        |
| ENSG00000260630 | SNAI3-AS1       | 16 | 88663298  | 88687186  | antisense                          | 49,07 | 0        |
| ENSG00000231831 | MTHFD1P1        | X  | 57392646  | 57395409  | processed_pseudogene               | 49,05 | 0        |
| ENSG00000176593 | ENSG00000176593 | 19 | 58002061  | 58011232  | processed_transcript               | 48,96 | 0        |
| ENSG00000189223 | PAX8-AS1        | 2  | 113211522 | 113276581 | processed_transcript               | 48,95 | 0        |
| ENSG00000234130 | ENSG00000234130 | X  | 93222220  | 93225015  | processed_pseudogene               | 48,89 | 0        |
| ENSG00000264044 | ENSG00000264044 | 17 | 28633206  | 28635950  | antisense                          | 48,75 | 0        |
| ENSG00000267594 | CYP4F24P        | 19 | 15760241  | 15779909  | unprocessed_pseudogene             | 48,70 | 1,40E-02 |
| ENSG00000261189 | ENSG00000261189 | 6  | 7540451   | 7541338   | antisense                          | 48,70 | 0        |
| ENSG00000231160 | KLF3-AS1        | 4  | 38612701  | 38664883  | processed_transcript               | 48,70 | 0        |
| ENSG00000260879 | ENSG00000260879 | 1  | 108199926 | 108201491 | antisense                          | 48,70 | 0        |
| ENSG00000267422 | ENSG00000267422 | 19 | 37779686  | 37792865  | transcribed_processed_pseudogene   | 48,67 | 0        |
| ENSG00000235138 | ENSG00000235138 | 9  | 134054290 | 134058805 | antisense                          | 48,60 | 0        |
| ENSG00000237972 | TUBG1P          | 7  | 43918697  | 43920054  | processed_pseudogene               | 48,60 | 1,40E-02 |
| ENSG00000230733 | ENSG00000230733 | 7  | 5475804   | 5479811   | lincRNA                            | 48,60 | 0        |
| ENSG00000233138 | ENSG00000233138 | 6  | 142748443 | 142753759 | antisense                          | 48,50 | 0        |
| ENSG00000224680 | PLA2G12AP1      | 1  | 52368677  | 52369244  | processed_pseudogene               | 48,46 | 0        |
| ENSG00000183022 | TPM3P8          | 2  | 230573167 | 230573809 | processed_pseudogene               | 48,36 | 0        |
| ENSG00000254680 | ENSG00000254680 | 11 | 12261426  | 12263173  | antisense                          | 48,33 | 0        |
| ENSG00000225099 | ATP6V1E1P1      | 1  | 42903232  | 42903912  | processed_pseudogene               | 48,31 | 0        |
| ENSG00000270069 | MIR222HG        | X  | 45745211  | 45770274  | lincRNA                            | 48,10 | 0        |
| ENSG00000228285 | LYPLA2P1        | 6  | 33365548  | 33366243  | processed_pseudogene               | 48,05 | 0        |
| ENSG00000255050 | ENSG00000255050 | 8  | 143573490 | 143577397 | antisense                          | 47,92 | 0        |
| ENSG00000275964 | ENSG00000275964 | 13 | 19863858  | 19865048  | lincRNA                            | 47,90 | 0        |
| ENSG00000273295 | ENSG00000273295 | 22 | 23901432  | 23907068  | lincRNA                            | 47,80 | 0        |
| ENSG00000276952 | ENSG00000276952 | 20 | 25284915  | 25285588  | antisense                          | 47,80 | 0        |
| ENSG00000240787 | ENSG00000240787 | 3  | 111570638 | 111571054 | processed_pseudogene               | 47,80 | 0        |
| ENSG00000231064 | ENSG00000231064 | 1  | 155195004 | 155205495 | antisense                          | 47,76 | 0        |
| ENSG00000245261 | ENSG00000245261 | 6  | 43213801  | 43223860  | antisense                          | 47,75 | 0        |
| ENSG00000268895 | A1BG-AS1        | 19 | 58347751  | 58355183  | antisense                          | 47,65 | 0        |
| ENSG00000226247 | SUPT4H1P1       | 2  | 75651288  | 75651627  | processed_pseudogene               | 47,64 | 0        |
| ENSG00000232780 | GAPDHP74        | 1  | 119434166 | 119435080 | transcribed_processed_pseudogene   | 47,60 | 0        |
| ENSG00000232630 | PRPS1P2         | 9  | 125150653 | 125151589 | processed_pseudogene               | 47,58 | 0        |
| ENSG00000243055 | GK-AS1          | X  | 30699998  | 30724174  | antisense                          | 47,50 | 0        |
| ENSG00000234537 | ENSG00000234537 | 9  | 92132398  | 92138629  | unprocessed_pseudogene             | 47,40 | 0        |
| ENSG00000273230 | ENSG00000273230 | 7  | 1464497   | 1467522   | lincRNA                            | 47,36 | 0        |
| ENSG00000262585 | ENSG00000262585 | 17 | 79915252  | 79926725  | lincRNA                            | 47,30 | 0        |
| ENSG00000274653 | ENSG00000274653 | 16 | 30359825  | 30360336  | antisense                          | 47,25 | 0        |
| ENSG00000229880 | IMMTP1          | 21 | 44675868  | 44678086  | processed_pseudogene               | 47,11 | 7,06E-02 |
| ENSG00000236467 | KCNMA1-AS1      | 10 | 76888044  | 76980624  | antisense                          | 47,11 | 0        |
| ENSG00000164845 | FAM86FP         | 12 | 8232512   | 8242948   | transcribed_unprocessed_pseudogene | 47,10 | 0        |
| ENSG00000248610 | HSPA8P4         | 5  | 130140031 | 130141950 | processed_pseudogene               | 47,10 | 0        |
| ENSG00000227199 | ST7-AS1         | 7  | 116952446 | 116954334 | antisense                          | 46,96 | 0        |
| ENSG00000231025 | ENSG00000231025 | 10 | 96992450  | 96995959  | antisense                          | 46,85 | 0        |
| ENSG00000267691 | SHC1P2          | 17 | 44228760  | 44230228  | processed_pseudogene               | 46,80 | 7,06E-02 |
| ENSG00000275719 | ENSG00000275719 | 19 | 46787815  | 46789043  | antisense                          | 46,73 | 0        |
| ENSG00000184441 | ENSG00000184441 | 21 | 44331234  | 44335851  | antisense                          | 46,72 | 0        |
| ENSG00000223764 | ENSG00000223764 | 1  | 916865    | 921016    | lincRNA                            | 46,70 | 0        |
| ENSG00000272711 | ENSG00000272711 | 2  | 74832655  | 74833987  | lincRNA                            | 46,67 | 0        |
| ENSG00000255389 | ENSG00000255389 | 6  | 111599875 | 111602295 | antisense                          | 46,60 | 0        |
| ENSG00000226872 | ENSG00000226872 | 22 | 21031357  | 21043969  | antisense                          | 46,50 | 0        |
| ENSG00000261326 | LINC01355       | 1  | 23281309  | 23286752  | lincRNA                            | 46,40 | 0        |
| ENSG00000233077 | LINC01271       | 20 | 50310711  | 50321342  | lincRNA                            | 46,30 | 0        |
| ENSG00000254762 | ENSG00000254762 | 11 | 66267635  | 66268129  | antisense                          | 46,10 | 0        |

|                 |                 |    |           |           |                                    |       |           |
|-----------------|-----------------|----|-----------|-----------|------------------------------------|-------|-----------|
| ENSG00000213613 | ENSG00000213613 | 10 | 87945502  | 87946024  | processed_pseudogene               | 46,10 | 0         |
| ENSG00000235823 | OLMALINC        | 10 | 100373615 | 100383368 | lincRNA                            | 45,90 | 0         |
| ENSG00000259891 | ENSG00000259891 | 8  | 140505813 | 140508043 | antisense                          | 45,90 | 0         |
| ENSG00000263033 | ENSG00000263033 | 16 | 11196177  | 11224969  | lincRNA                            | 45,60 | 0         |
| ENSG00000230955 | ENSG00000230955 | 1  | 37860697  | 37861580  | antisense                          | 45,54 | 0         |
| ENSG00000231154 | MORF4L2-AS1     | X  | 103687284 | 103691772 | antisense                          | 45,54 | 0         |
| ENSG00000244535 | ENSG00000244535 | 11 | 32758268  | 32758614  | processed_pseudogene               | 45,48 | 0         |
| ENSG00000231686 | ENSG00000231686 | X  | 146619597 | 146620584 | processed_pseudogene               | 45,41 | 0         |
| ENSG00000272599 | ENSG00000272599 | 10 | 73124573  | 73125532  | antisense                          | 45,40 | 0         |
| ENSG00000259994 | ENSG00000259994 | 10 | 30302826  | 30306066  | sense_overlapping                  | 45,30 | 0         |
| ENSG00000229413 | ENSG00000229413 | 7  | 128653690 | 128654019 | processed_pseudogene               | 45,30 | 0         |
| ENSG00000272077 | ENSG00000272077 | 3  | 44667412  | 44669364  | lincRNA                            | 45,27 | 0         |
| ENSG00000258634 | ENSG00000258634 | 1  | 110058340 | 110062555 | antisense                          | 45,23 | 0         |
| ENSG00000242125 | SNHG3           | 1  | 28505980  | 28510892  | sense_intronic                     | 45,15 | 0         |
| ENSG00000237286 | ENSG00000237286 | 7  | 2944035   | 2947091   | antisense                          | 45,10 | 0         |
| ENSG00000267439 | ENSG00000267439 | 19 | 35747057  | 35753415  | antisense                          | 45,00 | 0         |
| ENSG00000204685 | STARD7-AS1      | 2  | 96208416  | 96242621  | processed_transcript               | 44,98 | 0         |
| ENSG00000182310 | SPACA6P         | 19 | 51693340  | 51712387  | processed_transcript               | 44,90 | 0         |
| ENSG00000268471 | ENSG00000268471 | 4  | 152536264 | 152539263 | lincRNA                            | 44,88 | 0         |
| ENSG00000261061 | ENSG00000261061 | 16 | 81030770  | 81031485  | sense_intronic                     | 44,80 | 0         |
| ENSG00000235316 | DUSP8P5         | 10 | 73731824  | 73733638  | processed_pseudogene               | 44,80 | 0         |
| ENSG00000224167 | ENSG00000224167 | 1  | 112850028 | 112877871 | lincRNA                            | 44,80 | 0         |
| ENSG00000228404 | ENSG00000228404 | 21 | 46185079  | 46188941  | antisense                          | 44,77 | 0         |
| ENSG00000255435 | ENSG00000255435 | 11 | 118511911 | 118531094 | antisense                          | 44,73 | 0         |
| ENSG00000213971 | ENSG00000213971 | 19 | 23259906  | 23274251  | processed_transcript               | 44,64 | 0         |
| ENSG00000215347 | SLC25A5P1       | 22 | 42001069  | 42001966  | processed_pseudogene               | 44,60 | 7,06E-02  |
| ENSG00000239415 | ENSG00000239415 | 21 | 46251549  | 46254133  | antisense                          | 44,60 | 0         |
| ENSG00000238184 | CD81-AS1        | 11 | 2328749   | 2377992   | antisense                          | 44,59 | 0         |
| ENSG00000238247 | ENSG00000238247 | X  | 27517884  | 27519759  | processed_pseudogene               | 44,59 | 0         |
| ENSG00000219102 | HNRNPA3P12      | 1  | 53974969  | 53976031  | processed_pseudogene               | 44,55 | 0         |
| ENSG00000257202 | ENSG00000257202 | 12 | 101923410 | 101924719 | antisense                          | 44,50 | 0         |
| ENSG00000233230 | ENSG00000233230 | 2  | 47905678  | 47907810  | antisense                          | 44,30 | 0         |
| ENSG00000184068 | ENSG00000184068 | 22 | 41831215  | 41834665  | antisense                          | 44,21 | 0         |
| ENSG00000217624 | ENSG00000217624 | X  | 41675760  | 41676494  | processed_pseudogene               | 44,15 | 0         |
| ENSG00000162840 | MT2P1           | 4  | 68376323  | 68376505  | processed_pseudogene               | 44,14 | 2,21E-02  |
| ENSG00000218980 | FTH1P15         | 6  | 57004520  | 57004799  | processed_pseudogene               | 44,10 | 0         |
| ENSG00000239528 | RPS14P8         | 5  | 116562562 | 116562930 | processed_pseudogene               | 43,90 | 0,2161218 |
| ENSG00000233251 | ENSG00000233251 | 2  | 56173534  | 56185770  | antisense                          | 43,90 | 0         |
| ENSG00000225377 | NRSN2-AS1       | 20 | 320313    | 348224    | antisense                          | 43,73 | 0         |
| ENSG00000224904 | ENSG00000224904 | 1  | 11877770  | 11880406  | processed_pseudogene               | 43,70 | 0         |
| ENSG00000235703 | LINC00894       | X  | 149938628 | 150224580 | antisense                          | 43,67 | 0         |
| ENSG00000234290 | ENSG00000234290 | 5  | 132468890 | 132473043 | antisense                          | 43,50 | 0         |
| ENSG00000174171 | ENSG00000174171 | 15 | 41892793  | 41898575  | antisense                          | 43,46 | 0         |
| ENSG00000267257 | ENSG00000267257 | 18 | 58535415  | 58538552  | antisense                          | 43,45 | 0         |
| ENSG00000248115 | ENSG00000248115 | 4  | 52945649  | 52958087  | antisense                          | 43,40 | 0         |
| ENSG00000272770 | ENSG00000272770 | 17 | 2683305   | 2685088   | antisense                          | 43,39 | 0         |
| ENSG00000267106 | ZNF561-AS1      | 19 | 9621291   | 9645896   | processed_transcript               | 43,33 | 0         |
| ENSG00000236675 | MTX1P1          | 1  | 155230975 | 155234325 | unprocessed_pseudogene             | 43,30 | 0         |
| ENSG00000272419 | ENSG00000272419 | 1  | 145164099 | 145216058 | processed_transcript               | 43,30 | 0         |
| ENSG00000218350 | LYPLA1P3        | 6  | 71165076  | 71165770  | processed_pseudogene               | 43,24 | 0         |
| ENSG00000267980 | ENSG00000267980 | 19 | 4363789   | 4364640   | antisense                          | 43,23 | 0         |
| ENSG00000259456 | ADNP-AS1        | 20 | 50930984  | 50945134  | antisense                          | 43,20 | 0         |
| ENSG00000204177 | BMS1P1          | 10 | 46786674  | 46811989  | transcribed_unprocessed_pseudogene | 43,20 | 0         |
| ENSG00000223403 | MEG9            | 14 | 101069911 | 101072937 | lincRNA                            | 43,10 | 0         |
| ENSG00000263624 | ENSG00000263624 | 17 | 17167946  | 17185554  | antisense                          | 42,96 | 0         |
| ENSG00000280927 | CTBP1-AS        | 4  | 1210120   | 1218591   | antisense                          | 42,96 | 0         |
| ENSG00000227473 | TSSK5P          | 8  | 144141214 | 144143664 | unitary_pseudogene                 | 42,90 | 0         |
| ENSG00000267283 | ENSG00000267283 | 19 | 1989401   | 1990370   | processed_transcript               | 42,80 | 0         |
| ENSG00000277283 | ENSG00000277283 | 12 | 120116907 | 120119000 | antisense                          | 42,80 | 0         |



|                 |                 |    |           |           |                                    |       |           |
|-----------------|-----------------|----|-----------|-----------|------------------------------------|-------|-----------|
| ENSG00000272720 | ENSG00000272720 | 22 | 38090127  | 38091559  | lincRNA                            | 42,70 | 0         |
| ENSG00000269867 | ENSG00000269867 | 19 | 57867038  | 57868172  | sense_intronic                     | 42,64 | 0         |
| ENSG00000188013 | MEIS3P2         | 17 | 20589293  | 20590367  | processed_pseudogene               | 42,64 | 0         |
| ENSG00000267801 | ENSG00000267801 | 17 | 75876372  | 75879546  | antisense                          | 42,50 | 0         |
| ENSG00000257732 | ENSG00000257732 | 12 | 104262314 | 104280722 | antisense                          | 42,50 | 0         |
| ENSG00000240449 | ENSG00000240449 | 7  | 150363777 | 150372590 | antisense                          | 42,50 | 0         |
| ENSG00000242294 | STAG3L5P        | 7  | 100336079 | 100351900 | transcribed_unprocessed_pseudogene | 42,49 | 0         |
| ENSG00000228409 | CCT6P1          | 7  | 65751142  | 65763354  | transcribed_unprocessed_pseudogene | 42,47 | 0         |
| ENSG00000266904 | ENSG00000266904 | 19 | 19757366  | 19776423  | lincRNA                            | 42,40 | 0         |
| ENSG00000250893 | ENSG00000250893 | 4  | 40426119  | 40427585  | antisense                          | 42,40 | 0         |
| ENSG00000214900 | LINC01588       | 14 | 49927571  | 50092643  | lincRNA                            | 42,38 | 0         |
| ENSG00000274259 | ENSG00000274259 | 6  | 33437363  | 33454453  | antisense                          | 42,37 | 0         |
| ENSG00000251571 | DDX3P3          | 4  | 103572089 | 103574082 | processed_pseudogene               | 42,35 | 0         |
| ENSG00000233830 | EIF4HP1         | 7  | 27458163  | 27458849  | processed_pseudogene               | 42,31 | 0         |
| ENSG00000234166 | ARHGEF19-AS1    | 1  | 16197854  | 16198357  | antisense                          | 42,30 | 0         |
| ENSG00000272742 | ENSG00000272742 | 5  | 139364677 | 139369717 | antisense                          | 42,11 | 0         |
| ENSG00000196421 | LINC00176       | 20 | 64034344  | 64039962  | lincRNA                            | 42,10 | 0         |
| ENSG00000197989 | SNHG12          | 1  | 28578538  | 28582983  | antisense                          | 42,03 | 0         |
| ENSG00000269194 | ENSG00000269194 | 19 | 49808933  | 49809738  | antisense                          | 42,00 | 0         |
| ENSG00000273389 | ENSG00000273389 | 4  | 86000327  | 86000766  | antisense                          | 42,00 | 0         |
| ENSG00000217060 | ENSG00000217060 | 6  | 85286076  | 85290849  | unprocessed_pseudogene             | 41,90 | 0         |
| ENSG00000248415 | GAPDHP61        | 15 | 64528667  | 64529671  | processed_pseudogene               | 41,90 | 0,2161218 |
| ENSG00000253607 | ENSG00000253607 | 8  | 123002560 | 123030751 | antisense                          | 41,90 | 0         |
| ENSG00000269688 | ENSG00000269688 | 19 | 38844729  | 38845499  | sense_intronic                     | 41,80 | 0         |
| ENSG00000261971 | MMP25-AS1       | 16 | 3051096   | 3059370   | antisense                          | 41,79 | 0         |
| ENSG00000263585 | ENSG00000263585 | 17 | 81932398  | 81933058  | antisense                          | 41,79 | 0         |
| ENSG00000227678 | ENSG00000227678 | 6  | 130133410 | 130146179 | antisense                          | 41,77 | 0         |
| ENSG00000224597 | SVIL-AS1        | 10 | 29409402  | 29487745  | antisense                          | 41,76 | 0         |
| ENSG00000213842 | SUGT1P2         | 3  | 32752910  | 32753901  | processed_pseudogene               | 41,70 | 7,06E-02  |
| ENSG00000223427 | ENSG00000223427 | 2  | 80162428  | 80163135  | processed_pseudogene               | 41,62 | 0         |
| ENSG00000185596 | WASH3P          | 15 | 101961603 | 101976543 | transcribed_unprocessed_pseudogene | 41,59 | 0         |
| ENSG00000223745 | ENSG00000223745 | 1  | 93262186  | 93346025  | processed_transcript               | 41,51 | 0         |
| ENSG00000225345 | SNX18P3         | 9  | 38566260  | 38568211  | transcribed_unprocessed_pseudogene | 41,50 | 0         |
| ENSG00000270983 | ENSG00000270983 | 6  | 142062717 | 142063053 | processed_pseudogene               | 41,46 | 0         |
| ENSG00000231205 | ZNF826P         | 19 | 20340269  | 20424969  | transcribed_unprocessed_pseudogene | 41,42 | 0         |
| ENSG00000235246 | ENSG00000235246 | 22 | 38231320  | 38232248  | antisense                          | 41,36 | 0         |
| ENSG00000281183 | NPTN-IT1        | 15 | 73567012  | 73569294  | sense_intronic                     | 41,33 | 0         |
| ENSG00000223825 | DAZAP2P1        | 2  | 202201384 | 202201886 | processed_pseudogene               | 41,29 | 0         |
| ENSG00000267475 | ENSG00000267475 | 19 | 32687089  | 32691750  | lincRNA                            | 41,28 | 0         |
| ENSG00000232959 | ENSG00000232959 | 1  | 170024077 | 170024683 | antisense                          | 41,20 | 0         |
| ENSG00000205763 | RP9P            | 7  | 32916815  | 32943176  | transcribed_unprocessed_pseudogene | 41,14 | 0         |
| ENSG00000224407 | ENSG00000224407 | 1  | 230280312 | 230281893 | antisense                          | 41,13 | 0         |
| ENSG00000268030 | ENSG00000268030 | 19 | 18557775  | 18561560  | antisense                          | 41,00 | 0         |
| ENSG00000253352 | TUG1            | 22 | 30970677  | 30979395  | antisense                          | 40,97 | 0         |
| ENSG00000236319 | ENSG00000236319 | 17 | 55526964  | 55561577  | transcribed_processed_pseudogene   | 40,92 | 0         |
| ENSG00000260563 | ENSG00000260563 | 17 | 82293716  | 82294910  | lincRNA                            | 40,90 | 0         |
| ENSG00000261240 | ENSG00000261240 | 16 | 2112335   | 2113342   | antisense                          | 40,90 | 0         |
| ENSG00000260219 | ENSG00000260219 | 16 | 30355441  | 30357104  | lincRNA                            | 40,87 | 0         |
| ENSG00000218416 | ENSG00000218416 | 2  | 240449315 | 240456714 | processed_transcript               | 40,80 | 0         |
| ENSG00000278730 | ENSG00000278730 | 17 | 68126666  | 68129586  | lincRNA                            | 40,72 | 0         |
| ENSG00000269896 | ENSG00000269896 | 1  | 2350414   | 2352820   | transcribed_processed_pseudogene   | 40,70 | 0         |
| ENSG00000272654 | ENSG00000272654 | 1  | 153977743 | 153979160 | lincRNA                            | 40,70 | 0         |

|                 |                 |    |           |           |                                    |       |           |
|-----------------|-----------------|----|-----------|-----------|------------------------------------|-------|-----------|
| ENSG00000227671 | ENSG00000227671 | 1  | 247189851 | 247210856 | transcribed_unprocessed_pseudogene | 40,65 | 0         |
| ENSG00000230067 | HSPD1P6         | 3  | 36767117  | 36784167  | transcribed_processed_pseudogene   | 40,64 | 0         |
| ENSG00000271198 | VDAC3P1         | 14 | 99964529  | 99965378  | processed_pseudogene               | 40,62 | 0,2746192 |
| ENSG00000259321 | ENSG00000259321 | 14 | 24139445  | 24140444  | lincRNA                            | 40,60 | 0         |
| ENSG00000262049 | ENSG00000262049 | 17 | 81701324  | 81703300  | antisense                          | 40,57 | 0         |
| ENSG00000263388 | ENSG00000263388 | 17 | 10680734  | 10683988  | antisense                          | 40,50 | 0         |
| ENSG00000275741 | ENSG00000275741 | 13 | 109785831 | 109808252 | antisense                          | 40,50 | 0         |
| ENSG00000248890 | HHIP-AS1        | 4  | 144642922 | 144661357 | antisense                          | 40,50 | 0         |
| ENSG00000272455 | ENSG00000272455 | 1  | 1409096   | 1410618   | lincRNA                            | 40,50 | 0         |
| ENSG00000230626 | ENSG00000230626 | 7  | 129126518 | 129130793 | transcribed_processed_pseudogene   | 40,44 | 0         |
| ENSG00000099251 | HSD17B7P2       | 10 | 38356380  | 38378505  | transcribed_unprocessed_pseudogene | 40,40 | 0         |
| ENSG00000280594 | ENSG00000280594 | 21 | 17611744  | 17633199  | processed_transcript               | 40,40 | 0         |
| ENSG00000250031 | ENSG00000250031 | 8  | 58424588  | 58426685  | processed_pseudogene               | 40,40 | 0         |
| ENSG00000270210 | ENSG00000270210 | 2  | 28425945  | 28426719  | lincRNA                            | 40,40 | 0         |
| ENSG00000250539 | KRT8P33         | 5  | 123400922 | 123402344 | processed_pseudogene               | 40,36 | 0         |
| ENSG00000242261 | ENSG00000242261 | 7  | 128306649 | 128307678 | processed_pseudogene               | 40,27 | 0         |
| ENSG00000204620 | ENSG00000204620 | X  | 48568014  | 48574860  | antisense                          | 40,13 | 0         |
| ENSG00000261087 | ENSG00000261087 | 8  | 101166805 | 101169629 | lincRNA                            | 40,10 | 0         |
| ENSG00000215692 | ENSG00000215692 | 2  | 241734715 | 241735498 | antisense                          | 40,10 | 0         |
| ENSG00000233871 | DLG5-AS1        | 10 | 77927372  | 77929824  | processed_transcript               | 40,00 | 0         |
| ENSG00000270082 | ENSG00000270082 | 16 | 87326987  | 87327584  | antisense                          | 39,90 | 0         |
| ENSG00000230373 | GOLGA6L5P       | 15 | 84507885  | 84516814  | transcribed_unprocessed_pseudogene | 39,90 | 0         |
| ENSG00000146556 | WASH2P          | 2  | 113588550 | 113599043 | transcribed_unprocessed_pseudogene | 39,82 | 0         |
| ENSG00000226986 | ENSG00000226986 | 1  | 211207239 | 211207897 | processed_pseudogene               | 39,82 | 0         |
| ENSG00000269176 | ENSG00000269176 | 11 | 62786023  | 62786785  | antisense                          | 39,77 | 0         |
| ENSG00000269926 | ENSG00000269926 | 10 | 72274915  | 72275980  | antisense                          | 39,76 | 0         |
| ENSG00000256799 | ENSG00000256799 | 12 | 4635349   | 4636140   | processed_pseudogene               | 39,70 | 0         |
| ENSG00000261546 | ENSG00000261546 | 16 | 89113175  | 89115279  | antisense                          | 39,69 | 0         |
| ENSG00000224870 | ENSG00000224870 | 1  | 1399522   | 1402046   | processed_transcript               | 39,64 | 0         |
| ENSG00000214176 | PLEKHM1P        | 17 | 64779259  | 64837154  | transcribed_unprocessed_pseudogene | 39,62 | 0         |
| ENSG00000197083 | ZNF300P1        | 5  | 150930645 | 150946289 | transcribed_unprocessed_pseudogene | 39,58 | 0         |
| ENSG00000232742 | RHOQP2          | 2  | 131460999 | 131461577 | processed_pseudogene               | 39,58 | 0         |
| ENSG00000203709 | C1orf132        | 1  | 207801518 | 207869150 | lincRNA                            | 39,48 | 0         |
| ENSG00000180229 | HERC2P3         | 15 | 20379495  | 20506180  | transcribed_unprocessed_pseudogene | 39,28 | 0         |
| ENSG00000258559 | ENSG00000258559 | 14 | 74289127  | 74294425  | sense_overlapping                  | 39,25 | 0         |
| ENSG00000254614 | ENSG00000254614 | 11 | 65177606  | 65181834  | antisense                          | 39,20 | 0         |
| ENSG00000272655 | ENSG00000272655 | 7  | 44013562  | 44019170  | transcribed_unprocessed_pseudogene | 39,10 | 0         |
| ENSG00000274818 | ENSG00000274818 | 14 | 70906657  | 70907111  | lincRNA                            | 39,04 | 0         |
| ENSG00000230532 | ENSG00000230532 | 17 | 48931791  | 48937100  | antisense                          | 39,02 | 0         |
| ENSG00000226009 | KCNIP2-AS1      | 10 | 101819078 | 101828779 | antisense                          | 39,00 | 0         |
| ENSG00000265287 | ENSG00000265287 | 17 | 28607963  | 28609730  | antisense                          | 38,90 | 0         |
| ENSG00000225864 | HCG4P11         | 6  | 29722981  | 29723971  | unprocessed_pseudogene             | 38,90 | 0         |
| ENSG00000214194 | LINC00998       | 7  | 113116718 | 113118613 | lincRNA                            | 38,82 | 0         |
| ENSG00000274020 | LINC01138       | 1  | 148362995 | 148460150 | lincRNA                            | 38,80 | 0         |
| ENSG00000235554 | ENSG00000235554 | 17 | 16616848  | 16617881  | processed_pseudogene               | 38,77 | 0         |
| ENSG00000228748 | ENSG00000228748 | 10 | 77782866  | 77793176  | antisense                          | 38,73 | 0         |
| ENSG00000270574 | ENSG00000270574 | 2  | 178578790 | 178580906 | antisense                          | 38,73 | 0         |
| ENSG00000276728 | ENSG00000276728 | 17 | 45146730  | 45148470  | lincRNA                            | 38,70 | 0         |
| ENSG00000234405 | ENSG00000234405 | X  | 103497523 | 103500317 | antisense                          | 38,67 | 0         |
| ENSG00000261790 | ENSG00000261790 | 16 | 1984877   | 1990357   | lincRNA                            | 38,64 | 0         |

|                 |                 |    |           |           |                                        |       |           |
|-----------------|-----------------|----|-----------|-----------|----------------------------------------|-------|-----------|
| ENSG00000213513 | ENSG00000213513 | 10 | 77780337  | 77781876  | processed_pseudogene                   | 38,60 | 0         |
| ENSG00000248802 | ENSG00000248802 | 4  | 128582999 | 128601407 | lincRNA                                | 38,60 | 0         |
| ENSG00000236528 | ENSG00000236528 | 1  | 25859613  | 25863420  | antisense                              | 38,59 | 0         |
| ENSG00000261659 | ENSG00000261659 | 16 | 689001    | 692554    | processed_transcript                   | 38,55 | 0         |
| ENSG00000257800 | FNBP1P1         | 2  | 74120680  | 74123218  | processed_pseudogene                   | 38,55 | 0         |
| ENSG00000270333 | ENSG00000270333 | 10 | 109661814 | 109662050 | processed_pseudogene                   | 38,50 | 0         |
| ENSG00000213197 | ENSG00000213197 | 2  | 152389937 | 152390630 | processed_pseudogene                   | 38,50 | 0         |
| ENSG00000213963 | ENSG00000213963 | 2  | 177283508 | 177392691 | sense_overlapping                      | 38,50 | 0         |
| ENSG00000267315 | ENSG00000267315 | 17 | 35377416  | 35377678  | processed_pseudogene                   | 38,43 | 0         |
| ENSG00000272909 | ENSG00000272909 | 14 | 64440369  | 64442238  | antisense                              | 38,43 | 0         |
| ENSG00000238113 | LINC01410       | 9  | 62801461  | 62813486  | lincRNA                                | 38,40 | 0         |
| ENSG00000228838 | ENSG00000228838 | 1  | 53288024  | 53289706  | antisense                              | 38,40 | 0         |
| ENSG00000256249 | ENSG00000256249 | 12 | 122687125 | 122715979 | lincRNA                                | 38,20 | 0         |
| ENSG00000226081 | USP12PX         | X  | 90112650  | 90113706  | processed_pseudogene                   | 38,18 | 0         |
| ENSG00000187952 | HS6ST1P1        | 1  | 21428303  | 21429536  | processed_pseudogene                   | 38,14 | 0         |
| ENSG00000277089 | ENSG00000277089 | 17 | 36072866  | 36090134  | antisense                              | 38,10 | 0         |
| ENSG00000272604 | ENSG00000272604 | 7  | 105571083 | 105573660 | antisense                              | 38,10 | 0         |
| ENSG00000259125 | LRP1-AS         | 12 | 57144620  | 57147619  | antisense                              | 38,00 | 0         |
| ENSG00000254230 | ENSG00000254230 | 8  | 22565997  | 22567171  | antisense                              | 38,00 | 0         |
| ENSG00000261167 | ENSG00000261167 | 3  | 131455126 | 131458598 | sense_overlapping                      | 38,00 | 0         |
| ENSG00000231970 | ENSG00000231970 | 10 | 97401115  | 97419524  | antisense                              | 37,93 | 0         |
| ENSG00000180747 | SMG1P3          | 16 | 21446683  | 21520444  | transcribed_unprocess<br>ed_pseudogene | 37,91 | 0         |
| ENSG00000237188 | ENSG00000237188 | 1  | 147172771 | 147211568 | antisense                              | 37,91 | 0         |
| ENSG00000237432 | RPS7P12         | X  | 134650830 | 134651411 | processed_pseudogene                   | 37,90 | 0         |
| ENSG00000227544 | ENSG00000227544 | 7  | 35715034  | 35734887  | lincRNA                                | 37,83 | 0         |
| ENSG00000182165 | TP53TG1         | 7  | 87325225  | 87345515  | lincRNA                                | 37,80 | 0         |
| ENSG00000238084 | ENSG00000238084 | 1  | 25398721  | 25399198  | processed_pseudogene                   | 37,73 | 0         |
| ENSG00000236829 | ENSG00000236829 | 16 | 382097    | 392960    | transcribed_processed_<br>pseudogene   | 37,70 | 0         |
| ENSG00000269940 | ENSG00000269940 | 14 | 103694560 | 103695170 | sense_intronic                         | 37,61 | 0         |
| ENSG00000225269 | LINC00705       | 10 | 4655427   | 4662419   | lincRNA                                | 37,60 | 0         |
| ENSG00000272899 | ENSG00000272899 | 7  | 128866579 | 128872044 | lincRNA                                | 37,60 | 0         |
| ENSG00000229659 | ENSG00000229659 | 10 | 73422259  | 73422696  | processed_pseudogene                   | 37,57 | 0,2161218 |
| ENSG00000272056 | ENSG00000272056 | 2  | 27053618  | 27054276  | antisense                              | 37,55 | 0         |
| ENSG00000227115 | ENSG00000227115 | 18 | 51346249  | 51643939  | lincRNA                                | 37,51 | 0         |
| ENSG00000235546 | ENSG00000235546 | 17 | 20612667  | 20614008  | processed_pseudogene                   | 37,50 | 0         |
| ENSG00000260174 | ENSG00000260174 | 15 | 30044455  | 30045296  | processed_pseudogene                   | 37,50 | 0         |
| ENSG00000267049 | ENSG00000267049 | 19 | 35769144  | 35771028  | antisense                              | 37,40 | 0         |
| ENSG00000260317 | ENSG00000260317 | 8  | 80541300  | 80543104  | lincRNA                                | 37,40 | 0         |
| ENSG00000240616 | RPS6P25         | 19 | 12894133  | 12894880  | processed_pseudogene                   | 37,39 | 0         |
| ENSG00000259706 | HSP90B2P        | 15 | 99257632  | 99260015  | processed_pseudogene                   | 37,37 | 0         |
| ENSG00000268309 | ENSG00000268309 | 19 | 16551773  | 16552328  | antisense                              | 37,36 | 0         |
| ENSG00000226698 | ENSG00000226698 | 1  | 26876133  | 26878245  | antisense                              | 37,30 | 0         |
| ENSG00000276141 | WHAMMP3         | 15 | 22664359  | 22686213  | transcribed_unprocess<br>ed_pseudogene | 37,27 | 0         |
| ENSG00000271538 | ENSG00000271538 | 4  | 184506460 | 184537554 | lincRNA                                | 37,22 | 0         |
| ENSG00000272149 | ENSG00000272149 | 3  | 33144104  | 33147721  | antisense                              | 37,20 | 0         |
| ENSG00000254459 | ENSG00000254459 | 11 | 77829654  | 77872262  | antisense                              | 37,11 | 0         |
| ENSG00000227492 | ENSG00000227492 | 10 | 100229667 | 100234000 | antisense                              | 37,08 | 0         |
| ENSG00000234764 | E2F6P1          | 22 | 18833694  | 18834438  | processed_pseudogene                   | 37,00 | 0         |
| ENSG00000249249 | ENSG00000249249 | 5  | 115602057 | 115620659 | antisense                              | 36,95 | 0         |
| ENSG00000225507 | ENSG00000225507 | 7  | 47956793  | 47957318  | processed_pseudogene                   | 36,90 | 0         |
| ENSG00000180764 | PIPSL           | 10 | 93958191  | 93961540  | transcribed_processed_<br>pseudogene   | 36,87 | 0         |
| ENSG00000268812 | ENSG00000268812 | 22 | 30246205  | 30246998  | antisense                              | 36,70 | 0         |
| ENSG00000239345 | HNRNPA1P26      | X  | 100855288 | 100856379 | processed_pseudogene                   | 36,70 | 0         |
| ENSG00000257605 | ENSG00000257605 | 12 | 53298655  | 53300314  | antisense                              | 36,68 | 0         |
| ENSG00000232160 | RAP2C-AS1       | X  | 132217147 | 132432862 | antisense                              | 36,63 | 0         |
| ENSG00000230291 | ENSG00000230291 | 12 | 80102899  | 80103333  | processed_pseudogene                   | 36,61 | 0         |
| ENSG00000231964 | ENSG00000231964 | 10 | 45444570  | 45453121  | antisense                              | 36,60 | 0         |

|                 |                 |    |           |           |                                        |       |           |
|-----------------|-----------------|----|-----------|-----------|----------------------------------------|-------|-----------|
| ENSG00000269737 | ENSG00000269737 | 1  | 1671990   | 1673411   | antisense                              | 36,60 | 0         |
| ENSG00000232956 | SNHG15          | 7  | 44983023  | 44986961  | lincRNA                                | 36,59 | 0         |
| ENSG00000178503 | NECAP1P1        | 7  | 37585500  | 37586329  | processed_pseudogene                   | 36,58 | 0         |
| ENSG00000246596 | ENSG00000246596 | 5  | 177619059 | 177672209 | transcribed_unprocess<br>ed_pseudogene | 36,53 | 0         |
| ENSG00000266296 | ARIH2P1         | 18 | 28651732  | 28653208  | processed_pseudogene                   | 36,52 | 0         |
| ENSG00000226328 | NUP50-AS1       | 22 | 45133020  | 45163781  | lincRNA                                | 36,43 | 0         |
| ENSG00000234742 | ENSG00000234742 | 3  | 197850400 | 197850954 | processed_pseudogene                   | 36,43 | 0,0358681 |
| ENSG00000249026 | ENSG00000249026 | 5  | 115389643 | 115392370 | processed_pseudogene                   | 36,42 | 0         |
| ENSG00000228703 | ENSG00000228703 | 1  | 109628417 | 109630305 | antisense                              | 36,34 | 0         |
| ENSG00000253138 | LINC00967       | 8  | 66192093  | 66197315  | lincRNA                                | 36,30 | 0         |
| ENSG00000276529 | ENSG00000276529 | 21 | 44978832  | 44979274  | lincRNA                                | 36,27 | 0         |
| ENSG00000270987 | ENSG00000270987 | 6  | 100889603 | 100890338 | processed_pseudogene                   | 36,24 | 0         |
| ENSG00000223534 | HLA-DQB1-AS1    | 6  | 32659880  | 32660729  | antisense                              | 36,20 | 0         |
| ENSG00000228989 | ENSG00000228989 | 2  | 241690414 | 241694289 | antisense                              | 36,20 | 0         |
| ENSG00000272256 | ENSG00000272256 | 8  | 30082758  | 30083467  | antisense                              | 36,20 | 0         |
| ENSG00000224628 | ENSG00000224628 | 20 | 31285317  | 31286835  | processed_pseudogene                   | 36,15 | 0         |
| ENSG00000267419 | ENSG00000267419 | 19 | 19776602  | 19836073  | transcribed_unprocess<br>ed_pseudogene | 36,10 | 0         |
| ENSG00000230870 | FBXW11P1        | 21 | 31627127  | 31628600  | processed_pseudogene                   | 36,09 | 0         |
| ENSG00000231544 | RSL24D1P11      | 18 | 57838476  | 57838966  | processed_pseudogene                   | 36,00 | 0,2161218 |
| ENSG00000255284 | ENSG00000255284 | 11 | 777578    | 784297    | lincRNA                                | 36,00 | 0         |
| ENSG00000255958 | ENSG00000255958 | 12 | 10214161  | 10214761  | antisense                              | 35,90 | 0         |
| ENSG00000230454 | ENSG00000230454 | 3  | 50260303  | 50263358  | lincRNA                                | 35,80 | 0         |
| ENSG00000226963 | ENSG00000226963 | 2  | 172427774 | 172428603 | antisense                              | 35,77 | 0         |
| ENSG00000188206 | HNRNPU-AS1      | 1  | 244840638 | 244846903 | antisense                              | 35,73 | 0         |
| ENSG00000278709 | NKILA           | 20 | 57710183  | 57712780  | antisense                              | 35,70 | 0         |
| ENSG00000259775 | ENSG00000259775 | 14 | 103331674 | 103332367 | antisense                              | 35,70 | 0         |
| ENSG00000229519 | ENSG00000229519 | 1  | 6547905   | 6548619   | processed_pseudogene                   | 35,70 | 1,40E-02  |
| ENSG00000259216 | ENSG00000259216 | 15 | 48725338  | 48725827  | processed_pseudogene                   | 35,69 | 0         |
| ENSG00000226696 | LENG8-AS1       | 19 | 54444813  | 54449045  | antisense                              | 35,60 | 0         |
| ENSG00000256282 | ENSG00000256282 | 11 | 18595459  | 18599683  | transcribed_processed_<br>pseudogene   | 35,60 | 1,40E-02  |
| ENSG00000247925 | ENSG00000247925 | 6  | 11173452  | 11259099  | antisense                              | 35,60 | 0         |
| ENSG00000254855 | ENSG00000254855 | 11 | 66264777  | 66265666  | antisense                              | 35,58 | 0         |
| ENSG00000269973 | ENSG00000269973 | 2  | 9936360   | 9939590   | lincRNA                                | 35,52 | 0         |
| ENSG00000263859 | ENSG00000263859 | 17 | 81878667  | 81879557  | lincRNA                                | 35,50 | 0         |
| ENSG00000233846 | ENSG00000233846 | 9  | 6278667   | 6279153   | processed_pseudogene                   | 35,40 | 0         |
| ENSG00000269918 | ENSG00000269918 | 8  | 11104691  | 11106704  | sense_intronic                         | 35,37 | 0         |
| ENSG00000262001 | DLGAP1-AS2      | 18 | 3603000   | 3608336   | antisense                              | 35,30 | 0         |
| ENSG00000261338 | ENSG00000261338 | 2  | 218255319 | 218257366 | sense_overlapping                      | 35,30 | 0         |
| ENSG00000230849 | GOT2P2          | 1  | 173141100 | 173142350 | processed_pseudogene                   | 35,30 | 0         |
| ENSG00000268199 | ENSG00000268199 | 19 | 18441419  | 18443597  | antisense                              | 35,29 | 0         |
| ENSG00000260231 | JHDM1D-AS1      | 7  | 140177261 | 140179640 | antisense                              | 35,28 | 0         |
| ENSG00000229023 | ENSG00000229023 | 2  | 190992639 | 190993567 | processed_pseudogene                   | 35,23 | 0         |
| ENSG00000219790 | OSTCP6          | 6  | 56975606  | 56976062  | processed_pseudogene                   | 35,20 | 0,2161218 |
| ENSG00000236013 | ENSG00000236013 | 6  | 140067435 | 140093721 | lincRNA                                | 35,20 | 0         |
| ENSG00000258959 | ENSG00000258959 | 14 | 102036315 | 102066228 | antisense                              | 35,16 | 0         |
| ENSG00000232149 | FERP1           | X  | 123603139 | 123603931 | processed_pseudogene                   | 35,16 | 0         |
| ENSG00000270504 | ENSG00000270504 | 6  | 3751111   | 3753871   | antisense                              | 35,10 | 0         |
| ENSG00000248694 | ENSG00000248694 | 4  | 182772565 | 182773931 | antisense                              | 35,10 | 0         |
| ENSG00000225138 | ENSG00000225138 | 5  | 473236    | 480884    | processed_transcript                   | 35,07 | 0         |
| ENSG00000241158 | ADAMTS9-AS1     | 3  | 64561322  | 64592757  | antisense                              | 35,06 | 0         |
| ENSG00000224334 | ENSG00000224334 | 22 | 24686923  | 24688087  | processed_pseudogene                   | 35,00 | 0         |
| ENSG00000235665 | LINC00298       | 2  | 7922425   | 8278084   | lincRNA                                | 34,96 | 0         |
| ENSG00000232788 | ENSG00000232788 | 2  | 172464262 | 172466022 | antisense                              | 34,94 | 0         |
| ENSG00000232176 | ENSG00000232176 | 9  | 19200335  | 19201046  | processed_pseudogene                   | 34,91 | 0,1836819 |
| ENSG00000257878 | ENSG00000257878 | 12 | 95996521  | 96011489  | antisense                              | 34,90 | 0         |
| ENSG00000277728 | ENSG00000277728 | 17 | 73202968  | 73203431  | antisense                              | 34,90 | 0         |
| ENSG00000227487 | NCAM1-AS1       | 11 | 113269532 | 113273901 | antisense                              | 34,69 | 0         |
| ENSG00000271707 | ATP1B3P1        | 2  | 60734895  | 60735715  | processed_pseudogene                   | 34,58 | 0         |

|                 |                 |    |           |           |                                    |       |           |
|-----------------|-----------------|----|-----------|-----------|------------------------------------|-------|-----------|
| ENSG00000270959 | LPP-AS2         | 3  | 188151206 | 188154057 | antisense                          | 34,53 | 0         |
| ENSG00000259865 | ENSG00000259865 | 1  | 247187281 | 247188526 | lincRNA                            | 34,50 | 0         |
| ENSG00000238278 | ALG1L6P         | 3  | 75415070  | 75422143  | unprocessed_pseudogene             | 34,45 | 0         |
| ENSG00000260621 | ENSG00000260621 | 16 | 56409320  | 56411683  | antisense                          | 34,43 | 0         |
| ENSG00000251556 | ENSG00000251556 | 5  | 146099406 | 146120412 | antisense                          | 34,41 | 0         |
| ENSG00000256612 | CYP2B7P         | 19 | 40924219  | 40950660  | transcribed_unprocessed_pseudogene | 34,40 | 0         |
| ENSG00000260855 | ENSG00000260855 | 1  | 246772301 | 246775772 | antisense                          | 34,40 | 0         |
| ENSG00000254414 | ENSG00000254414 | 15 | 84631898  | 84633987  | antisense                          | 34,36 | 0         |
| ENSG00000272831 | ENSG00000272831 | 7  | 66739829  | 66740385  | antisense                          | 34,36 | 0         |
| ENSG00000232794 | HNRNPDP1        | X  | 64044305  | 64045058  | processed_pseudogene               | 34,31 | 0         |
| ENSG00000274561 | ENSG00000274561 | 17 | 68131462  | 68131907  | lincRNA                            | 34,30 | 0         |
| ENSG00000225357 | RPF2P1          | 20 | 35752814  | 35753719  | processed_pseudogene               | 34,26 | 0         |
| ENSG00000268006 | PTOV1-AS1       | 19 | 49838639  | 49851676  | antisense                          | 34,26 | 0         |
| ENSG00000205898 | ENSG00000205898 | 7  | 125159974 | 125160547 | processed_pseudogene               | 34,20 | 0         |
| ENSG00000271270 | TMCC1-AS1       | 3  | 129893871 | 129918575 | antisense                          | 34,18 | 0         |
| ENSG00000257621 | PSMA3-AS1       | 14 | 58265365  | 58298134  | antisense                          | 34,15 | 0         |
| ENSG00000273576 | ENSG00000273576 | 17 | 39566915  | 39567559  | lincRNA                            | 34,10 | 0         |
| ENSG00000224172 | ENSG00000224172 | 7  | 64735933  | 64736743  | processed_pseudogene               | 34,10 | 0         |
| ENSG00000225449 | RAB6C-AS1       | 2  | 129966592 | 129980466 | transcribed_unprocessed_pseudogene | 34,09 | 6,27E-03  |
| ENSG00000232043 | ENSG00000232043 | 20 | 50570975  | 50578041  | antisense                          | 34,08 | 0         |
| ENSG00000235001 | EIF4A1P2        | X  | 5337745   | 5338964   | processed_pseudogene               | 34,06 | 0         |
| ENSG00000204860 | FAM201A         | 9  | 38620474  | 38624990  | antisense                          | 34,00 | 0         |
| ENSG00000270223 | ENSG00000270223 | X  | 74009389  | 74011468  | sense_intronic                     | 34,00 | 0         |
| ENSG00000272631 | ENSG00000272631 | 10 | 86749754  | 86756298  | antisense                          | 33,88 | 0         |
| ENSG00000272004 | ENSG00000272004 | 1  | 1659325   | 1662602   | antisense                          | 33,81 | 0         |
| ENSG00000236754 | ENSG00000236754 | 22 | 17580157  | 17589192  | antisense                          | 33,80 | 0         |
| ENSG00000271032 | ENSG00000271032 | 19 | 35014961  | 35025335  | antisense                          | 33,80 | 0         |
| ENSG00000233622 | CYP2T1P         | 19 | 40808525  | 40811390  | unitary_pseudogene                 | 33,75 | 0         |
| ENSG00000261278 | ENSG00000261278 | 16 | 60024578  | 60025141  | processed_pseudogene               | 33,70 | 7,06E-02  |
| ENSG00000223741 | PSMD4P1         | 21 | 36485983  | 36487411  | processed_pseudogene               | 33,60 | 0,2161218 |
| ENSG00000276278 | ENSG00000276278 | 15 | 84622015  | 84623237  | antisense                          | 33,60 | 0         |
| ENSG00000227220 | ENSG00000227220 | 6  | 131950946 | 132077393 | antisense                          | 33,60 | 0         |
| ENSG00000251435 | C1GALT1P2       | 5  | 56192530  | 56193633  | processed_pseudogene               | 33,60 | 0         |
| ENSG00000271774 | ENSG00000271774 | 20 | 53255979  | 53487274  | antisense                          | 33,56 | 0         |
| ENSG00000266980 | ENSG00000266980 | 17 | 75818815  | 75820055  | antisense                          | 33,46 | 0         |
| ENSG00000246100 | LINC00900       | 11 | 115754248 | 115760627 | lincRNA                            | 33,40 | 0         |
| ENSG00000260805 | ENSG00000260805 | 1  | 212557833 | 212559731 | lincRNA                            | 33,40 | 0         |
| ENSG00000272356 | ENSG00000272356 | 6  | 111309203 | 111313517 | antisense                          | 33,36 | 0         |
| ENSG00000227201 | CNN2P1          | 22 | 30046276  | 30047193  | processed_pseudogene               | 33,30 | 0         |
| ENSG00000231162 | COX11P1         | 6  | 28446973  | 28447807  | processed_pseudogene               | 33,30 | 0         |
| ENSG00000265399 | ENSG00000265399 | 18 | 3190397   | 3247277   | antisense                          | 33,29 | 0         |
| ENSG00000259856 | RAB43P1         | 16 | 46626404  | 46626992  | processed_pseudogene               | 33,13 | 0         |
| ENSG00000262772 | ENSG00000262772 | 17 | 79823452  | 79827704  | lincRNA                            | 33,10 | 0         |
| ENSG00000272324 | ENSG00000272324 | 5  | 10761065  | 10770294  | antisense                          | 33,10 | 0         |
| ENSG00000228305 | ENSG00000228305 | 2  | 63622178  | 63622831  | processed_pseudogene               | 33,08 | 0         |
| ENSG00000226210 | ENSG00000226210 | 12 | 14522     | 32015     | unprocessed_pseudogene             | 33,03 | 0         |
| ENSG00000174365 | SNHG11          | 20 | 38446578  | 38450921  | processed_transcript               | 33,00 | 0         |
| ENSG00000223973 | ENSG00000223973 | 2  | 111383752 | 111384992 | transcribed_processed_pseudogene   | 33,00 | 0         |
| ENSG00000165511 | C10orf25        | 10 | 44997698  | 45000888  | antisense                          | 32,94 | 0         |
| ENSG00000264701 | ENSG00000264701 | 17 | 47980398  | 47996196  | antisense                          | 32,92 | 0         |
| ENSG00000257307 | ENSG00000257307 | 14 | 35881001  | 35881709  | processed_pseudogene               | 32,90 | 0         |
| ENSG00000235314 | LINC00957       | 7  | 44039171  | 44042306  | lincRNA                            | 32,90 | 0         |
| ENSG00000267328 | ENSG00000267328 | 19 | 35754566  | 35755490  | antisense                          | 32,89 | 0         |
| ENSG00000229190 | ENSG00000229190 | 10 | 17695709  | 17700232  | antisense                          | 32,80 | 0         |
| ENSG00000244009 | B3GAT3P1        | 3  | 160452598 | 160453403 | processed_pseudogene               | 32,80 | 0         |
| ENSG00000108958 | ENSG00000108958 | 17 | 1858039   | 1858446   | processed_pseudogene               | 32,78 | 0         |

|                 |                 |    |           |           |                                        |       |           |
|-----------------|-----------------|----|-----------|-----------|----------------------------------------|-------|-----------|
| ENSG00000230163 | ENSG00000230163 | 1  | 34850694  | 34851555  | antisense                              | 32,70 | 0         |
| ENSG00000213904 | LIPE-AS1        | 19 | 42397128  | 42652355  | antisense                              | 32,61 | 0         |
| ENSG00000250115 | AK3P2           | 8  | 143057060 | 143057816 | processed_pseudogene                   | 32,60 | 0         |
| ENSG00000251441 | RTEL1P1         | 4  | 112356135 | 112359819 | processed_pseudogene                   | 32,60 | 0         |
| ENSG00000260572 | ENSG00000260572 | 3  | 160753428 | 160755142 | antisense                              | 32,55 | 0         |
| ENSG00000260465 | ENSG00000260465 | 16 | 66720897  | 66731785  | antisense                              | 32,52 | 0         |
| ENSG00000235472 | EIF4A1P7        | 13 | 28598833  | 28600052  | processed_pseudogene                   | 32,52 | 0         |
| ENSG00000268047 | ENSG00000268047 | 19 | 49852887  | 49854967  | antisense                              | 32,51 | 0         |
| ENSG00000176826 | FKBP9P1         | 7  | 55681074  | 55713252  | transcribed_unprocess<br>ed_pseudogene | 32,50 | 0         |
| ENSG00000255468 | ENSG00000255468 | 11 | 66347950  | 66364804  | antisense                              | 32,42 | 0         |
| ENSG00000257359 | ENSG00000257359 | 12 | 113932569 | 113937255 | antisense                              | 32,36 | 0         |
| ENSG00000235437 | LINC01278       | X  | 63343227  | 63561071  | processed_transcript                   | 32,25 | 0         |
| ENSG00000277558 | ENSG00000277558 | 20 | 34476205  | 34476787  | sense_intronic                         | 32,20 | 0         |
| ENSG00000233222 | ENSG00000233222 | 1  | 153750983 | 153752176 | antisense                              | 32,20 | 0         |
| ENSG00000213839 | TMX2P1          | 9  | 37885683  | 37886390  | processed_pseudogene                   | 32,13 | 0         |
| ENSG00000258515 | ENSG00000258515 | 14 | 20451305  | 20451918  | antisense                              | 32,10 | 0         |
| ENSG00000278784 | ENSG00000278784 | 14 | 24201612  | 24202811  | sense_intronic                         | 32,10 | 0         |
| ENSG00000240471 | PHBP8           | 3  | 119791829 | 119792553 | processed_pseudogene                   | 32,08 | 7,06E-02  |
| ENSG00000254559 | ENSG00000254559 | 11 | 203623    | 205470    | antisense                              | 32,07 | 0         |
| ENSG00000223482 | NUTM2A-AS1      | 10 | 87203875  | 87342612  | antisense                              | 32,04 | 0         |
| ENSG00000233929 | MT1XP1          | 1  | 16241213  | 16241398  | processed_pseudogene                   | 32,02 | 0,4850164 |
| ENSG00000268379 | ENSG00000268379 | 19 | 57175233  | 57177921  | processed_pseudogene                   | 32,00 | 0         |
| ENSG00000259032 | ENSAP2          | 14 | 82692704  | 82693055  | processed_pseudogene                   | 31,94 | 0         |
| ENSG00000273203 | ENSG00000273203 | 22 | 17067821  | 17070675  | lincRNA                                | 31,90 | 0         |
| ENSG00000215241 | ENSG00000215241 | 12 | 8235415   | 8242564   | lincRNA                                | 31,90 | 0         |
| ENSG00000274964 | ENSG00000274964 | 12 | 32339368  | 32340724  | sense_intronic                         | 31,82 | 0         |
| ENSG00000245025 | ENSG00000245025 | 8  | 22984596  | 23019335  | antisense                              | 31,82 | 0         |
| ENSG00000272574 | ENSG00000272574 | 1  | 162593103 | 162593754 | sense_intronic                         | 31,80 | 0         |
| ENSG00000254860 | TMEM9B-AS1      | 11 | 8964675   | 8977527   | antisense                              | 31,73 | 0         |
| ENSG00000279738 | ENSG00000279738 | 22 | 37876148  | 37895563  | sense_overlapping                      | 31,70 | 0         |
| ENSG00000235706 | DICER1-AS1      | 14 | 95157645  | 95179933  | antisense                              | 31,70 | 0         |
| ENSG00000229644 | NAMPTP1         | 10 | 36521721  | 36524234  | processed_pseudogene                   | 31,69 | 0         |
| ENSG00000246985 | SOCS2-AS1       | 12 | 93542463  | 93571768  | processed_transcript                   | 31,63 | 0         |
| ENSG00000264714 | ENSG00000264714 | 18 | 10724619  | 10728539  | transcribed_processed_<br>pseudogene   | 31,60 | 0         |
| ENSG00000250332 | ENSG00000250332 | 5  | 23303565  | 23305143  | processed_pseudogene                   | 31,60 | 0         |
| ENSG00000256469 | ENSG00000256469 | 11 | 94874052  | 94925521  | antisense                              | 31,57 | 0         |
| ENSG00000236779 | ENSG00000236779 | 1  | 204528845 | 204529692 | processed_pseudogene                   | 31,50 | 0         |
| ENSG00000264235 | ENSG00000264235 | 18 | 3255436   | 3261850   | antisense                              | 31,49 | 0         |
| ENSG00000248881 | ENSG00000248881 | 5  | 75598482  | 75599380  | antisense                              | 31,48 | 0         |
| ENSG00000232882 | PHKA1P1         | 1  | 90892992  | 90893612  | processed_pseudogene                   | 31,47 | 0         |
| ENSG00000233621 | LINC01137       | 1  | 37454879  | 37474411  | antisense                              | 31,45 | 0         |
| ENSG00000268729 | ENSG00000268729 | 19 | 55312029  | 55312495  | antisense                              | 31,44 | 0         |
| ENSG00000273058 | ENSG00000273058 | 1  | 236536162 | 236536704 | antisense                              | 31,40 | 0         |
| ENSG00000257270 | ENSG00000257270 | 14 | 105467793 | 105470617 | antisense                              | 31,31 | 0         |
| ENSG00000267481 | ENSG00000267481 | 19 | 19788755  | 19790531  | sense_intronic                         | 31,31 | 0         |
| ENSG00000270392 | PFN1P2          | 1  | 120432204 | 120434052 | transcribed_processed_<br>pseudogene   | 31,30 | 0         |
| ENSG00000227063 | RPL41P1         | 20 | 21755270  | 21755350  | processed_pseudogene                   | 31,24 | 0         |
| ENSG00000253676 | TAGLN2P1        | 8  | 106697427 | 106698013 | processed_pseudogene                   | 31,24 | 0         |
| ENSG00000251239 | ENSG00000251239 | 17 | 50627032  | 50631940  | antisense                              | 31,20 | 0         |
| ENSG00000244625 | MIATNB          | 22 | 26672767  | 26780207  | lincRNA                                | 31,10 | 0         |
| ENSG00000261101 | ENSG00000261101 | X  | 101627868 | 101628523 | sense_overlapping                      | 31,10 | 0         |
| ENSG00000248049 | UBA6-AS1        | 4  | 67701280  | 68080952  | antisense                              | 31,02 | 0         |
| ENSG00000259780 | ENSG00000259780 | 16 | 2235689   | 2236913   | lincRNA                                | 31,00 | 0         |
| ENSG00000224097 | ENSG00000224097 | 4  | 39480255  | 39481905  | transcribed_processed_<br>pseudogene   | 31,00 | 0         |
| ENSG00000274414 | ENSG00000274414 | 20 | 25239007  | 25245229  | lincRNA                                | 30,90 | 0         |
| ENSG00000235879 | FAR1P1          | 13 | 90170866  | 90171799  | processed_pseudogene                   | 30,90 | 0         |
| ENSG00000250271 | ENSG00000250271 | 3  | 151797484 | 151808249 | lincRNA                                | 30,90 | 0         |

|                 |                 |    |           |           |                                        |       |           |
|-----------------|-----------------|----|-----------|-----------|----------------------------------------|-------|-----------|
| ENSG00000239455 | ENSG00000239455 | 3  | 107104911 | 107107000 | processed_pseudogene                   | 30,82 | 0         |
| ENSG00000161643 | SIGLEC16        | 19 | 49969673  | 49975814  | transcribed_unprocess<br>ed_pseudogene | 30,80 | 0         |
| ENSG00000265474 | ENSG00000265474 | 17 | 28745569  | 28747652  | antisense                              | 30,80 | 0         |
| ENSG00000215493 | ENSG00000215493 | 22 | 20450122  | 20451824  | processed_pseudogene                   | 30,73 | 0         |
| ENSG00000261188 | ENSG00000261188 | 22 | 26512537  | 26514568  | antisense                              | 30,70 | 0         |
| ENSG00000224138 | ENSG00000224138 | 7  | 127350128 | 127351523 | antisense                              | 30,70 | 0         |
| ENSG00000272760 | ENSG00000272760 | 7  | 154951226 | 154952188 | antisense                              | 30,70 | 0         |
| ENSG00000213493 | ACTN4P1         | 4  | 116598161 | 116599611 | processed_pseudogene                   | 30,68 | 0         |
| ENSG00000234055 | ENSG00000234055 | 9  | 129097854 | 129100266 | antisense                              | 30,60 | 0         |
| ENSG00000225969 | ABHD11-AS1      | 7  | 73735038  | 73736054  | antisense                              | 30,60 | 0         |
| ENSG00000258092 | ENSG00000258092 | 12 | 2797136   | 2803938   | antisense                              | 30,60 | 0         |
| ENSG00000257376 | ENSG00000257376 | 12 | 42431665  | 42433357  | processed_pseudogene                   | 30,54 | 0         |
| ENSG00000267254 | ZNF790-AS1      | 19 | 36797518  | 36828115  | antisense                              | 30,54 | 0         |
| ENSG00000264019 | ENSG00000264019 | 17 | 47946802  | 47948275  | antisense                              | 30,54 | 0         |
| ENSG00000253982 | ENSG00000253982 | 8  | 1761990   | 1764502   | antisense                              | 30,53 | 0         |
| ENSG00000080947 | CROCCP3         | 1  | 16467436  | 16499257  | transcribed_unprocess<br>ed_pseudogene | 30,52 | 0         |
| ENSG00000261526 | ENSG00000261526 | 19 | 1874871   | 1876169   | lincRNA                                | 30,50 | 0         |
| ENSG00000260105 | AOC4P           | 17 | 42865922  | 42874369  | transcribed_unprocess<br>ed_pseudogene | 30,50 | 0         |
| ENSG00000260911 | ENSG00000260911 | 16 | 31043150  | 31049868  | lincRNA                                | 30,50 | 0         |
| ENSG00000268234 | FKBP4P6         | 9  | 42384805  | 42386136  | processed_pseudogene                   | 30,47 | 0         |
| ENSG00000255503 | ENSG00000255503 | 11 | 83072402  | 83097196  | lincRNA                                | 30,44 | 0         |
| ENSG00000237719 | ENSG00000237719 | 6  | 36091991  | 36092646  | processed_pseudogene                   | 30,40 | 0         |
| ENSG00000237798 | ENSG00000237798 | 2  | 174575227 | 174587726 | antisense                              | 30,40 | 0         |
| ENSG00000197301 | ENSG00000197301 | 12 | 65851340  | 65882167  | antisense                              | 30,30 | 0         |
| ENSG00000185986 | SDHAP3          | 5  | 1572222   | 1594620   | transcribed_unprocess<br>ed_pseudogene | 30,29 | 0         |
| ENSG00000234936 | ENSG00000234936 | 2  | 43229573  | 43233394  | antisense                              | 30,23 | 0         |
| ENSG00000183506 | PI4KAP2         | 22 | 21473000  | 21517533  | transcribed_unprocess<br>ed_pseudogene | 30,21 | 0         |
| ENSG00000235958 | UBOX5-AS1       | 20 | 3106913   | 3150867   | antisense                              | 30,20 | 0         |
| ENSG00000236581 | STARD13-AS      | 13 | 33180401  | 33281584  | processed_transcript                   | 30,20 | 0         |
| ENSG00000276517 | ENSG00000276517 | 2  | 32526504  | 32529507  | sense_intronic                         | 30,13 | 0         |
| ENSG00000255422 | ENSG00000255422 | 11 | 118704607 | 118750263 | antisense                              | 30,12 | 0         |
| ENSG00000236567 | TCF3P1          | 9  | 5110913   | 5112849   | processed_pseudogene                   | 30,10 | 0         |
| ENSG00000272142 | ENSG00000272142 | 6  | 5029972   | 5043449   | lincRNA                                | 30,10 | 0         |
| ENSG00000273485 | ENSG00000273485 | 10 | 103450196 | 103450852 | antisense                              | 30,00 | 0         |
| ENSG00000088340 | FER1L4          | 20 | 35558737  | 35607562  | unitary_pseudogene                     | 29,97 | 0         |
| ENSG00000233030 | ENSG00000233030 | 1  | 149785659 | 149793020 | antisense                              | 29,90 | 0         |
| ENSG00000229851 | ARSD-AS1        | X  | 2904904   | 2906081   | antisense                              | 29,87 | 0         |
| ENSG00000245904 | ENSG00000245904 | 12 | 92145573  | 92189660  | antisense                              | 29,82 | 0         |
| ENSG00000229758 | DYNLT3P2        | 2  | 128199901 | 128200195 | processed_pseudogene                   | 29,80 | 0         |
| ENSG00000244567 | ENSG00000244567 | 2  | 207821290 | 207822769 | lincRNA                                | 29,76 | 0         |
| ENSG00000255455 | ENSG00000255455 | 11 | 130866254 | 130870247 | lincRNA                                | 29,76 | 0         |
| ENSG00000240291 | ENSG00000240291 | 10 | 18513115  | 18545651  | antisense                              | 29,75 | 0         |
| ENSG00000262691 | ENSG00000262691 | 16 | 67261108  | 67263784  | processed_transcript                   | 29,70 | 0         |
| ENSG00000249779 | ENSG00000249779 | 5  | 43206709  | 43207811  | processed_pseudogene                   | 29,70 | 0,2161218 |
| ENSG00000214465 | SMARCE1P6       | 2  | 26149204  | 26150731  | processed_pseudogene                   | 29,67 | 0,1392851 |
| ENSG00000251667 | BRCC3P1         | 5  | 176308063 | 176309013 | processed_pseudogene                   | 29,61 | 0         |
| ENSG00000231871 | IPO9-AS1        | 1  | 201688259 | 201829559 | antisense                              | 29,55 | 0         |
| ENSG00000187953 | PMS2CL          | 7  | 6710128   | 6753862   | transcribed_unprocess<br>ed_pseudogene | 29,54 | 0         |
| ENSG00000172460 | PRSS30P         | 16 | 2839568   | 2842744   | unitary_pseudogene                     | 29,50 | 0         |
| ENSG00000281332 | LINC00997       | 7  | 32760279  | 32762924  | lincRNA                                | 29,50 | 0         |
| ENSG00000238197 | PAXBP1-AS1      | 21 | 32728115  | 32743122  | antisense                              | 29,49 | 0         |
| ENSG00000255993 | PSMC1P9         | 12 | 18692762  | 18694096  | processed_pseudogene                   | 29,45 | 4,86E-02  |
| ENSG00000263326 | ENSG00000263326 | 16 | 25071490  | 25072727  | unprocessed_pseudoge<br>ne             | 29,40 | 0         |
| ENSG00000257808 | ENSG00000257808 | 12 | 53159586  | 53161000  | lincRNA                                | 29,38 | 0         |

|                 |                 |    |           |           |                                    |       |          |
|-----------------|-----------------|----|-----------|-----------|------------------------------------|-------|----------|
| ENSG00000273271 | ENSG00000273271 | 21 | 31666728  | 31667247  | antisense                          | 29,30 | 0        |
| ENSG00000267571 | ENSG00000267571 | 19 | 5911578   | 5913899   | antisense                          | 29,20 | 0        |
| ENSG00000223509 | ENSG00000223509 | 15 | 32519848  | 32536926  | transcribed_processed_pseudogene   | 29,20 | 0        |
| ENSG00000067601 | PMS2P4          | 7  | 67295608  | 67302907  | transcribed_unprocessed_pseudogene | 29,17 | 0        |
| ENSG00000274383 | ENSG00000274383 | 15 | 64950916  | 64951435  | antisense                          | 29,10 | 0        |
| ENSG00000235902 | ENSG00000235902 | 4  | 185665885 | 185675417 | antisense                          | 29,10 | 0        |
| ENSG00000273179 | ENSG00000273179 | 4  | 1167778   | 1168174   | antisense                          | 29,10 | 0        |
| ENSG00000236138 | DUX4L26         | 3  | 75668931  | 75670185  | processed_pseudogene               | 29,10 | 7,06E-02 |
| ENSG00000234449 | ENSG00000234449 | X  | 3853010   | 3882317   | lincRNA                            | 29,08 | 0        |
| ENSG00000241111 | ENSG00000241111 | 3  | 64067964  | 64103131  | antisense                          | 29,08 | 0        |
| ENSG00000233351 | ENSG00000233351 | 6  | 129479615 | 129481410 | antisense                          | 29,05 | 0        |
| ENSG00000228830 | ENSG00000228830 | 1  | 234607008 | 234609483 | antisense                          | 29,03 | 0        |
| ENSG00000256116 | ENSG00000256116 | 11 | 64229214  | 64234352  | antisense                          | 29,01 | 0        |
| ENSG00000248027 | ENSG00000248027 | 11 | 100684162 | 100687955 | antisense                          | 29,00 | 0        |
| ENSG00000214961 | ENSG00000214961 | X  | 134272287 | 134273658 | processed_pseudogene               | 29,00 | 0        |
| ENSG00000117242 | PINK1-AS        | 1  | 20642657  | 20652193  | antisense                          | 28,98 | 0        |
| ENSG00000188185 | LINC00265       | 7  | 39733632  | 39793092  | lincRNA                            | 28,95 | 0        |
| ENSG00000237842 | ENSG00000237842 | 1  | 157059232 | 157060762 | processed_pseudogene               | 28,93 | 0        |
| ENSG00000228393 | LINC01004       | 7  | 104950315 | 105013044 | antisense                          | 28,90 | 0        |
| ENSG00000243150 | ENSG00000243150 | 3  | 158545220 | 158571066 | antisense                          | 28,88 | 0        |
| ENSG00000258900 | HNRNPCP1        | 14 | 58521223  | 58521988  | processed_pseudogene               | 28,84 | 6,27E-03 |
| ENSG00000272578 | ENSG00000272578 | 22 | 23658094  | 23717356  | transcribed_unprocessed_pseudogene | 28,82 | 0        |
| ENSG00000261616 | ENSG00000261616 | 15 | 99139317  | 99145370  | antisense                          | 28,80 | 0        |
| ENSG00000270050 | ENSG00000270050 | X  | 102599657 | 102659712 | antisense                          | 28,70 | 0        |
| ENSG00000272841 | ENSG00000272841 | 6  | 160990318 | 160992342 | antisense                          | 28,67 | 0        |
| ENSG00000240375 | VPS26AP1        | 3  | 113919222 | 113920200 | processed_pseudogene               | 28,67 | 9,18E-02 |
| ENSG00000253882 | ENSG00000253882 | 7  | 143761790 | 143836933 | transcribed_unprocessed_pseudogene | 28,63 | 0        |
| ENSG00000224936 | SUCLA2P1        | 6  | 30468882  | 30470251  | processed_pseudogene               | 28,63 | 0        |
| ENSG00000214019 | ENSG00000214019 | X  | 44029332  | 44030921  | processed_pseudogene               | 28,58 | 0        |
| ENSG00000215817 | ZC3H11B         | 1  | 219609627 | 219612062 | processed_pseudogene               | 28,57 | 0        |
| ENSG00000237714 | P4HA2-AS1       | 5  | 132184876 | 132192808 | antisense                          | 28,53 | 0        |
| ENSG00000267390 | ENSG00000267390 | 18 | 63367328  | 63381629  | antisense                          | 28,50 | 0        |
| ENSG00000262624 | ENSG00000262624 | 17 | 7436557   | 7437523   | antisense                          | 28,50 | 0        |
| ENSG00000272129 | ENSG00000272129 | 6  | 80355424  | 80356859  | lincRNA                            | 28,50 | 0        |
| ENSG00000260000 | ENSG00000260000 | 6  | 100881471 | 100882987 | antisense                          | 28,47 | 0        |
| ENSG00000258300 | NUTF2P2         | 14 | 35819837  | 35820220  | processed_pseudogene               | 28,43 | 0        |
| ENSG00000276710 | CSPG4P10        | 15 | 82459472  | 82477258  | transcribed_unprocessed_pseudogene | 28,41 | 0        |
| ENSG00000259250 | ENSG00000259250 | 15 | 58587507  | 58591676  | antisense                          | 28,40 | 0        |
| ENSG00000273226 | ENSG00000273226 | 9  | 19375451  | 19375996  | antisense                          | 28,40 | 0        |
| ENSG00000213300 | HNRNPA3P6       | 3  | 75214631  | 75215636  | processed_pseudogene               | 28,37 | 0        |
| ENSG00000276570 | ENSG00000276570 | 19 | 55227219  | 55230279  | processed_transcript               | 28,30 | 0        |
| ENSG00000259424 | ENSG00000259424 | 15 | 98646951  | 98647371  | antisense                          | 28,30 | 0        |
| ENSG00000215571 | GRK6P1          | 13 | 21319156  | 21320866  | processed_pseudogene               | 28,30 | 0        |
| ENSG00000243323 | PTPRVP          | 1  | 202168051 | 202189455 | unitary_pseudogene                 | 28,30 | 0        |
| ENSG00000235245 | ENSG00000235245 | 10 | 133295187 | 133295977 | antisense                          | 28,24 | 0        |
| ENSG00000241537 | ENSG00000241537 | 3  | 72772539  | 72773471  | processed_pseudogene               | 28,24 | 0        |
| ENSG00000247828 | TMEM161B-AS1    | 5  | 88268895  | 88436685  | antisense                          | 28,23 | 0        |
| ENSG00000261602 | ENSG00000261602 | 16 | 69709874  | 69710583  | antisense                          | 28,20 | 0        |
| ENSG00000274227 | ENSG00000274227 | 12 | 112018804 | 112019430 | antisense                          | 28,20 | 0        |
| ENSG00000253669 | ENSG00000253669 | 8  | 102805517 | 102809971 | lincRNA                            | 28,20 | 0        |
| ENSG00000236015 | ENSG00000236015 | 7  | 39569376  | 39570198  | processed_pseudogene               | 28,20 | 0        |
| ENSG00000249379 | ENSG00000249379 | 6  | 53503185  | 53506919  | antisense                          | 28,20 | 0        |
| ENSG00000276248 | ENSG00000276248 | 13 | 113527260 | 113530621 | sense_intronic                     | 28,18 | 0        |
| ENSG00000241014 | ENSG00000241014 | 1  | 34974356  | 34985313  | processed_transcript               | 28,17 | 0        |
| ENSG00000269910 | ENSG00000269910 | 14 | 103694516 | 103695050 | antisense                          | 28,12 | 0        |
| ENSG00000249142 | ENSG00000249142 | 5  | 32522758  | 32523865  | processed_pseudogene               | 28,10 | 0        |



|                 |                 |    |           |           |                                    |       |           |
|-----------------|-----------------|----|-----------|-----------|------------------------------------|-------|-----------|
| ENSG00000217165 | ANKRD18EP       | 6  | 39110321  | 39112952  | processed_pseudogene               | 28,07 | 0         |
| ENSG00000272789 | ENSG00000272789 | 2  | 127625997 | 127626848 | antisense                          | 28,07 | 0,1392851 |
| ENSG00000264247 | LINC00909       | 18 | 74591774  | 74598508  | lincRNA                            | 28,06 | 0         |
| ENSG00000271970 | ENSG00000271970 | 6  | 43561872  | 43562419  | antisense                          | 28,05 | 0         |
| ENSG00000272688 | ENSG00000272688 | 18 | 3246401   | 3247086   | lincRNA                            | 28,00 | 0         |
| ENSG00000264920 | ENSG00000264920 | 17 | 47891255  | 47895812  | processed_transcript               | 28,00 | 0         |
| ENSG00000259165 | DDX18P1         | 14 | 69083398  | 69085389  | processed_pseudogene               | 28,00 | 0         |
| ENSG00000267940 | ENSG00000267940 | 11 | 6201901   | 6203253   | lincRNA                            | 28,00 | 0         |
| ENSG00000244968 | LIFR-AS1        | 5  | 38556786  | 38671216  | antisense                          | 28,00 | 0         |
| ENSG00000272667 | ENSG00000272667 | 2  | 127886556 | 127887185 | lincRNA                            | 27,90 | 0         |
| ENSG00000176318 | FOXN3P1         | X  | 102546734 | 102548213 | processed_pseudogene               | 27,90 | 0         |
| ENSG00000264666 | ENSG00000264666 | 17 | 17591428  | 17610485  | antisense                          | 27,85 | 0         |
| ENSG00000254913 | ENSG00000254913 | 1  | 149006309 | 149009527 | antisense                          | 27,80 | 0         |
| ENSG00000253330 | ENSG00000253330 | 8  | 47511034  | 47512141  | processed_pseudogene               | 27,75 | 0         |
| ENSG00000258554 | ENSG00000258554 | 12 | 55966838  | 55967474  | antisense                          | 27,74 | 0         |
| ENSG00000213530 | MTHFD2P5        | 7  | 82589848  | 82590691  | processed_pseudogene               | 27,70 | 1,40E-02  |
| ENSG00000272223 | ENSG00000272223 | 6  | 43033897  | 43034405  | antisense                          | 27,70 | 0         |
| ENSG00000229020 | AKR7A2P1        | 1  | 112923423 | 112924337 | processed_pseudogene               | 27,70 | 0         |
| ENSG00000270380 | ENSG00000270380 | 1  | 110456505 | 110457354 | antisense                          | 27,70 | 0         |
| ENSG00000270075 | ENSG00000270075 | 10 | 104312141 | 104313881 | antisense                          | 27,67 | 0         |
| ENSG00000269958 | ENSG00000269958 | 14 | 103696353 | 103697163 | sense_intronic                     | 27,64 | 0         |
| ENSG00000213434 | VTI1BP2         | 4  | 183483490 | 183484185 | processed_pseudogene               | 27,62 | 0,1836819 |
| ENSG00000270598 | ENSG00000270598 | 1  | 226127178 | 226127346 | processed_pseudogene               | 27,60 | 0         |
| ENSG00000251022 | THAP9-AS1       | 4  | 82893009  | 82900960  | antisense                          | 27,59 | 0         |
| ENSG00000260185 | ENSG00000260185 | 16 | 71655027  | 71664212  | antisense                          | 27,58 | 0         |
| ENSG00000250397 | ENSG00000250397 | 11 | 856880    | 859795    | antisense                          | 27,50 | 0         |
| ENSG00000214135 | ENSG00000214135 | 3  | 197578213 | 197627906 | transcribed_unprocessed_pseudogene | 27,40 | 0         |
| ENSG00000274213 | ENSG00000274213 | 17 | 56914186  | 56914533  | lincRNA                            | 27,40 | 0         |
| ENSG00000269765 | ENSG00000269765 | 19 | 15515342  | 15516836  | unprocessed_pseudogene             | 27,36 | 0         |
| ENSG00000251474 | RPL32P3         | 3  | 129382922 | 129399655 | transcribed_unprocessed_pseudogene | 27,27 | 0         |
| ENSG00000265273 | PGDP1           | 18 | 31962178  | 31963618  | processed_pseudogene               | 27,25 | 0         |
| ENSG00000273373 | ENSG00000273373 | 1  | 110370154 | 110373003 | antisense                          | 27,25 | 0         |
| ENSG00000230565 | ZNF32-AS2       | 10 | 43645942  | 43648019  | antisense                          | 27,23 | 0         |
| ENSG00000273237 | ENSG00000273237 | 7  | 26173533  | 26174945  | antisense                          | 27,20 | 0         |
| ENSG00000250526 | CCT6P2          | 5  | 14639426  | 14641018  | processed_pseudogene               | 27,20 | 0         |
| ENSG00000234558 | API5P1          | X  | 116106921 | 116108430 | processed_pseudogene               | 27,19 | 0         |
| ENSG00000213500 | LAP3P2          | 6  | 36673817  | 36675270  | processed_pseudogene               | 27,14 | 0         |
| ENSG00000278291 | ENSG00000278291 | 13 | 20699307  | 20703718  | antisense                          | 27,10 | 0         |
| ENSG00000235865 | GSN-AS1         | 9  | 121280768 | 121285530 | antisense                          | 27,07 | 0         |
| ENSG00000261359 | PYCARD-AS1      | 16 | 31201885  | 31203452  | antisense                          | 27,00 | 0         |
| ENSG00000226380 | ENSG00000226380 | 7  | 130876809 | 130913310 | lincRNA                            | 26,93 | 0         |
| ENSG00000281691 | RBM5-AS1        | 3  | 50099603  | 50100988  | antisense                          | 26,92 | 0         |
| ENSG00000214076 | CPSF1P1         | 22 | 32269381  | 32273110  | processed_pseudogene               | 26,90 | 0         |
| ENSG00000250286 | ENSG00000250286 | 17 | 50537294  | 50538754  | processed_transcript               | 26,90 | 0         |
| ENSG00000282728 | ENSG00000282728 | 11 | 101129077 | 101209591 | processed_transcript               | 26,90 | 0         |
| ENSG00000234534 | CSNK1G2P1       | 9  | 5040945   | 5041940   | processed_pseudogene               | 26,90 | 0         |
| ENSG00000223797 | ENTPD3-AS1      | 3  | 40313802  | 40453329  | antisense                          | 26,90 | 0         |
| ENSG00000256271 | CACNA1C-AS2     | 12 | 2668500   | 2672220   | antisense                          | 26,84 | 0         |
| ENSG00000224837 | GCSHP5          | 1  | 168055901 | 168056422 | processed_pseudogene               | 26,83 | 0         |
| ENSG00000237788 | ENSG00000237788 | 20 | 49829125  | 49831085  | processed_pseudogene               | 26,80 | 0         |
| ENSG00000242797 | GLYCTK-AS1      | 3  | 52288580  | 52299067  | processed_transcript               | 26,80 | 0         |
| ENSG00000236811 | GAPDHP2         | 20 | 13392677  | 13393674  | processed_pseudogene               | 26,70 | 0,2161218 |
| ENSG00000237118 | CYP2F2P         | 19 | 40818721  | 40826772  | unitary_pseudogene                 | 26,70 | 0         |
| ENSG00000261094 | ENSG00000261094 | 9  | 122937623 | 122940333 | sense_overlapping                  | 26,70 | 0         |
| ENSG00000219294 | PIP5K1P1        | 6  | 7986537   | 7988192   | processed_pseudogene               | 26,70 | 0         |
| ENSG00000231203 | KRT8P10         | 2  | 183071040 | 183072486 | processed_pseudogene               | 26,70 | 0         |
| ENSG00000242282 | ENSG00000242282 | 2  | 3531813   | 3536873   | lincRNA                            | 26,70 | 0         |
| ENSG00000262420 | ENSG00000262420 | 16 | 11741910  | 11744506  | antisense                          | 26,64 | 0         |

|                 |                 |    |           |           |                                    |       |           |
|-----------------|-----------------|----|-----------|-----------|------------------------------------|-------|-----------|
| ENSG00000267370 | ENSG00000267370 | 19 | 9756152   | 9756863   | unprocessed_pseudogene             | 26,60 | 0         |
| ENSG00000266101 | ENSG00000266101 | 17 | 39173290  | 39177503  | antisense                          | 26,60 | 0         |
| ENSG00000235423 | ENSG00000235423 | 12 | 123252030 | 123261483 | antisense                          | 26,60 | 0         |
| ENSG00000255410 | ENSG00000255410 | 11 | 6630603   | 6635208   | antisense                          | 26,60 | 0         |
| ENSG00000259488 | ENSG00000259488 | 15 | 48312353  | 48331856  | antisense                          | 26,58 | 0         |
| ENSG00000223947 | ENSG00000223947 | 2  | 100993676 | 101002244 | antisense                          | 26,56 | 0         |
| ENSG00000198406 | BZW1P2          | 3  | 116645902 | 116646727 | processed_pseudogene               | 26,54 | 0         |
| ENSG00000228638 | FCF1P2          | 3  | 48290793  | 48291375  | processed_pseudogene               | 26,52 | 0         |
| ENSG00000261098 | ENSG00000261098 | 11 | 107312132 | 107316271 | lincRNA                            | 26,50 | 0         |
| ENSG00000248565 | TECRP2          | 4  | 124462863 | 124463790 | processed_pseudogene               | 26,50 | 0,2161218 |
| ENSG00000227742 | CALR4P          | 1  | 51561866  | 51594897  | unitary_pseudogene                 | 26,50 | 0         |
| ENSG00000237897 | ENSG00000237897 | 1  | 105890693 | 105891430 | processed_pseudogene               | 26,50 | 7,06E-02  |
| ENSG00000250071 | ENSG00000250071 | 5  | 74798994  | 74800100  | processed_pseudogene               | 26,47 | 0         |
| ENSG00000254428 | ENSG00000254428 | 11 | 119003742 | 119004893 | antisense                          | 26,40 | 0         |
| ENSG00000232303 | DFFBP1          | 9  | 32566148  | 32567126  | processed_pseudogene               | 26,40 | 0         |
| ENSG00000240950 | ENSG00000240950 | 3  | 142827096 | 142827728 | processed_pseudogene               | 26,38 | 3,30E-03  |
| ENSG00000268983 | ENSG00000268983 | 19 | 18568506  | 18569375  | antisense                          | 26,37 | 0         |
| ENSG00000229848 | ENSG00000229848 | 17 | 81514047  | 81527776  | antisense                          | 26,36 | 0         |
| ENSG00000229692 | SOS1-IT1        | 2  | 38992279  | 38993857  | sense_intronic                     | 26,33 | 0         |
| ENSG00000228314 | CYP4F29P        | 21 | 13843133  | 13848364  | transcribed_unprocessed_pseudogene | 26,30 | 0         |
| ENSG00000274370 | ENSG00000274370 | 17 | 83098377  | 83098987  | lincRNA                            | 26,30 | 0         |
| ENSG00000232104 | RFX3-AS1        | 9  | 3526723   | 3691814   | lincRNA                            | 26,30 | 0         |
| ENSG00000246145 | RRS1-AS1        | 8  | 66419589  | 66428977  | lincRNA                            | 26,30 | 0         |
| ENSG00000273356 | ENSG00000273356 | 3  | 50669989  | 50672048  | lincRNA                            | 26,30 | 0         |
| ENSG00000255500 | ENSG00000255500 | 11 | 50268161  | 50269273  | processed_pseudogene               | 26,29 | 0         |
| ENSG00000232909 | ENSG00000232909 | 6  | 35733867  | 35736947  | antisense                          | 26,25 | 0         |
| ENSG00000223358 | EHHADH-AS1      | 3  | 185162871 | 185191955 | antisense                          | 26,20 | 0         |
| ENSG00000214424 | FAM149B1P1      | 15 | 96756987  | 96758596  | processed_pseudogene               | 26,17 | 0         |
| ENSG00000273348 | ENSG00000273348 | 18 | 22347846  | 22348252  | lincRNA                            | 26,10 | 0         |
| ENSG00000225423 | TNPO1P1         | 10 | 84390908  | 84392045  | processed_pseudogene               | 26,10 | 0         |
| ENSG00000249167 | ENSG00000249167 | 5  | 116574482 | 116591398 | lincRNA                            | 26,10 | 0         |
| ENSG00000172799 | ZBTB8OSP2       | 2  | 231433923 | 231434426 | processed_pseudogene               | 26,10 | 0         |
| ENSG00000281195 | ZNF638-IT1      | 2  | 71373938  | 71376320  | processed_transcript               | 26,10 | 0         |
| ENSG00000278058 | ENSG00000278058 | 16 | 79605802  | 79606605  | lincRNA                            | 26,00 | 0         |
| ENSG00000257524 | ENSG00000257524 | 9  | 127867864 | 127886787 | processed_transcript               | 26,00 | 0         |
| ENSG00000270228 | ENSG00000270228 | 4  | 67718996  | 67724262  | processed_pseudogene               | 26,00 | 0         |
| ENSG00000273275 | ENSG00000273275 | 2  | 68179833  | 68180532  | antisense                          | 25,98 | 0         |
| ENSG00000236975 | ENSG00000236975 | 1  | 229092815 | 229094905 | lincRNA                            | 25,93 | 0         |
| ENSG00000271971 | ENSG00000271971 | 8  | 93715378  | 93716113  | antisense                          | 25,90 | 0         |
| ENSG00000219755 | ENSG00000219755 | 6  | 99575712  | 99576456  | processed_pseudogene               | 25,90 | 0         |
| ENSG00000275880 | ENSG00000275880 | 13 | 110613082 | 110616353 | antisense                          | 25,89 | 0         |
| ENSG00000242352 | FAM91A3P        | 1  | 143766540 | 143769083 | transcribed_processed_pseudogene   | 25,86 | 0         |
| ENSG00000205181 | LINC00654       | 20 | 5496067   | 5504613   | lincRNA                            | 25,84 | 0         |
| ENSG00000213713 | PIGCP1          | 11 | 33075566  | 33076460  | processed_pseudogene               | 25,83 | 0         |
| ENSG00000217801 | ENSG00000217801 | 1  | 1059734   | 1069355   | transcribed_unprocessed_pseudogene | 25,83 | 2,21E-02  |
| ENSG00000267080 | ASB16-AS1       | 17 | 44175973  | 44186717  | antisense                          | 25,80 | 0         |
| ENSG00000237522 | NONOP2          | 2  | 60936819  | 60938049  | processed_pseudogene               | 25,80 | 0         |
| ENSG00000267523 | ENSG00000267523 | 19 | 55661901  | 55674715  | antisense                          | 25,75 | 0         |
| ENSG00000235081 | ENSG00000235081 | 19 | 54229036  | 54230213  | processed_pseudogene               | 25,74 | 0         |
| ENSG00000276107 | ENSG00000276107 | 15 | 39586561  | 39587293  | sense_intronic                     | 25,73 | 0         |
| ENSG00000243829 | ENSG00000243829 | 19 | 49719498  | 49720081  | processed_pseudogene               | 25,72 | 0         |
| ENSG00000266709 | ENSG00000266709 | 17 | 14303854  | 14305505  | lincRNA                            | 25,70 | 0         |
| ENSG00000233205 | ENSG00000233205 | 2  | 87972656  | 87973082  | processed_pseudogene               | 25,70 | 0         |
| ENSG00000250519 | ENSG00000250519 | 11 | 94238150  | 94279206  | lincRNA                            | 25,60 | 0         |
| ENSG00000229391 | HLA-DRB6        | 6  | 32552713  | 32560022  | transcribed_unprocessed_pseudogene | 25,60 | 0         |
| ENSG00000237753 | ENSG00000237753 | 2  | 112641832 | 112645690 | lincRNA                            | 25,60 | 0         |

|                 |                 |    |           |           |                                    |       |           |
|-----------------|-----------------|----|-----------|-----------|------------------------------------|-------|-----------|
| ENSG00000251485 | ENSG00000251485 | 2  | 232343116 | 232343903 | processed_pseudogene               | 25,60 | 0         |
| ENSG00000223891 | OSER1-AS1       | 20 | 44210960  | 44226027  | lincRNA                            | 25,56 | 0         |
| ENSG00000230795 | HLA-K           | 6  | 29926459  | 29929232  | unprocessed_pseudogene             | 25,50 | 0         |
| ENSG00000267510 | ENSG00000267510 | 19 | 9291515   | 9294482   | antisense                          | 25,45 | 0         |
| ENSG00000228125 | AKIRIN1P2       | X  | 68132868  | 68133437  | processed_pseudogene               | 25,44 | 0         |
| ENSG00000224888 | ENSG00000224888 | 16 | 88731180  | 88741425  | antisense                          | 25,43 | 0         |
| ENSG00000272918 | ENSG00000272918 | 7  | 105102838 | 105105483 | antisense                          | 25,40 | 0         |
| ENSG00000273478 | ENSG00000273478 | 1  | 201995696 | 201996352 | antisense                          | 25,40 | 0         |
| ENSG00000177803 | ENSG00000177803 | 4  | 163932526 | 163933182 | processed_pseudogene               | 25,36 | 0         |
| ENSG00000226783 | TLK1P1          | 9  | 122685933 | 122688372 | processed_pseudogene               | 25,30 | 0         |
| ENSG00000259150 | LINC00929       | 15 | 26115813  | 26133037  | lincRNA                            | 25,30 | 7,06E-02  |
| ENSG00000251356 | RAB5CP2         | 5  | 91476382  | 91477018  | processed_pseudogene               | 25,30 | 0         |
| ENSG00000237276 | ANO7P1          | 1  | 16215909  | 16228027  | transcribed_unprocessed_pseudogene | 25,30 | 0         |
| ENSG00000271643 | ENSG00000271643 | 3  | 33795688  | 33796950  | lincRNA                            | 25,24 | 0         |
| ENSG00000278727 | ENSG00000278727 | 13 | 76887551  | 76891135  | lincRNA                            | 25,18 | 0         |
| ENSG00000235426 | ENSG00000235426 | 10 | 79382328  | 79409274  | antisense                          | 25,18 | 6,27E-03  |
| ENSG00000248256 | OCIAD1-AS1      | 4  | 48852008  | 48860203  | antisense                          | 25,18 | 0         |
| ENSG00000255220 | DDX18P5         | 11 | 130295641 | 130296946 | processed_pseudogene               | 25,17 | 0         |
| ENSG00000258048 | ENSG00000258048 | 12 | 79690144  | 79778451  | lincRNA                            | 25,08 | 0         |
| ENSG00000254452 | ENSG00000254452 | 11 | 66276779  | 66277492  | antisense                          | 25,08 | 0         |
| ENSG00000259022 | DNAJC8P1        | 14 | 35430260  | 35430631  | processed_pseudogene               | 25,07 | 0         |
| ENSG00000227227 | ENSG00000227227 | 2  | 186641339 | 186695287 | antisense                          | 25,07 | 0         |
| ENSG00000248113 | ENSG00000248113 | 4  | 82580117  | 82581384  | processed_pseudogene               | 25,06 | 0         |
| ENSG00000228766 | RPL7L1P8        | 3  | 182610674 | 182611414 | processed_pseudogene               | 24,92 | 3,30E-03  |
| ENSG00000281896 | ENSG00000281896 | 7  | 128617865 | 128625905 | transcribed_unprocessed_pseudogene | 24,91 | 0         |
| ENSG00000270344 | ENSG00000270344 | 12 | 89525654  | 89548005  | antisense                          | 24,90 | 0         |
| ENSG00000225217 | HSPA7           | 1  | 161606291 | 161608217 | unprocessed_pseudogene             | 24,90 | 0         |
| ENSG00000249673 | NOP14-AS1       | 4  | 2934899   | 2961738   | antisense                          | 24,85 | 0         |
| ENSG00000258128 | MKRN9P          | 12 | 87782163  | 87784568  | transcribed_processed_pseudogene   | 24,81 | 0         |
| ENSG00000233739 | ENSG00000233739 | 22 | 38057180  | 38073940  | antisense                          | 24,80 | 0         |
| ENSG00000250604 | ENSG00000250604 | 4  | 158199105 | 158200442 | antisense                          | 24,80 | 0         |
| ENSG00000258824 | ENSG00000258824 | 14 | 64422935  | 64448557  | antisense                          | 24,79 | 0         |
| ENSG00000226396 | ENSG00000226396 | 1  | 19608114  | 19608568  | processed_pseudogene               | 24,78 | 0,4332376 |
| ENSG00000225408 | ENSG00000225408 | 9  | 5719021   | 5720244   | antisense                          | 24,75 | 0         |
| ENSG00000236035 | ENSG00000236035 | 1  | 203656969 | 203657760 | processed_pseudogene               | 24,72 | 0         |
| ENSG00000224086 | ENSG00000224086 | 22 | 21938293  | 21977632  | antisense                          | 24,71 | 0         |
| ENSG00000234493 | RHOXF1P1        | X  | 120010718 | 120015544 | transcribed_unprocessed_pseudogene | 24,70 | 0         |
| ENSG00000227339 | THRAP3P1        | 3  | 31452832  | 31455894  | processed_pseudogene               | 24,69 | 0         |
| ENSG00000177447 | CBX3P1          | 11 | 27806443  | 27806996  | processed_pseudogene               | 24,69 | 0         |
| ENSG00000243431 | RPL5P30         | 11 | 118560690 | 118561580 | processed_pseudogene               | 24,67 | 0,3318209 |
| ENSG00000269001 | ZNF818P         | 19 | 53212988  | 53213396  | processed_pseudogene               | 24,60 | 0         |
| ENSG00000259959 | ENSG00000259959 | 4  | 47840122  | 47844339  | lincRNA                            | 24,56 | 0         |
| ENSG00000250462 | LRR37BP1        | 17 | 30629680  | 30637466  | transcribed_unprocessed_pseudogene | 24,54 | 0         |
| ENSG00000214812 | ENSG00000214812 | 1  | 28120449  | 28121321  | processed_pseudogene               | 24,54 | 0         |
| ENSG00000261512 | ENSG00000261512 | 16 | 46622861  | 46624451  | lincRNA                            | 24,50 | 0         |
| ENSG00000271554 | ENSG00000271554 | 1  | 35992109  | 36013630  | antisense                          | 24,50 | 0         |
| ENSG00000235078 | ENSG00000235078 | 2  | 3519275   | 3523197   | antisense                          | 24,44 | 0         |
| ENSG00000263731 | ENSG00000263731 | 17 | 81878425  | 81881106  | lincRNA                            | 24,44 | 0         |
| ENSG00000269821 | KCNQ1OT1        | 11 | 2608328   | 2699994   | antisense                          | 24,42 | 0         |
| ENSG00000256690 | ENSG00000256690 | 11 | 62832234  | 62834043  | antisense                          | 24,41 | 0         |
| ENSG00000225470 | JPX             | X  | 73944324  | 74070408  | lincRNA                            | 24,41 | 0         |
| ENSG00000276144 | ENSG00000276144 | 12 | 7115736   | 7116486   | lincRNA                            | 24,40 | 0         |
| ENSG00000259515 | ENSG00000259515 | 14 | 102933574 | 102937177 | antisense                          | 24,39 | 0         |
| ENSG00000239268 | ENSG00000239268 | 3  | 117672154 | 117997592 | lincRNA                            | 24,38 | 0         |

|                 |                 |    |           |           |                                        |       |           |
|-----------------|-----------------|----|-----------|-----------|----------------------------------------|-------|-----------|
| ENSG00000258938 | ENSG00000258938 | 14 | 35819224  | 35826765  | antisense                              | 24,37 | 0         |
| ENSG00000176868 | ENSG00000176868 | 9  | 131497479 | 131500191 | antisense                              | 24,35 | 0         |
| ENSG00000270091 | ENSG00000270091 | 17 | 19896590  | 19897287  | lincRNA                                | 24,30 | 0         |
| ENSG00000271344 | ENSG00000271344 | 7  | 128690451 | 128691717 | lincRNA                                | 24,30 | 0         |
| ENSG00000274265 | ENSG00000274265 | 1  | 149176022 | 149251013 | lincRNA                                | 24,30 | 0         |
| ENSG00000225313 | ENSG00000225313 | 1  | 33307348  | 33349245  | antisense                              | 24,29 | 0         |
| ENSG00000257337 | ENSG00000257337 | 12 | 53014596  | 53054438  | antisense                              | 24,27 | 0         |
| ENSG00000267601 | ENSG00000267601 | 17 | 78855478  | 78855844  | antisense                              | 24,26 | 0         |
| ENSG00000235013 | COX20P2         | 2  | 230957593 | 230957950 | processed_pseudogene                   | 24,22 | 0         |
| ENSG00000272630 | ENSG00000272630 | 10 | 73098044  | 73101297  | lincRNA                                | 24,20 | 0         |
| ENSG00000238279 | ENSG00000238279 | 1  | 153533603 | 153535115 | antisense                              | 24,20 | 0         |
| ENSG00000259924 | ENSG00000259924 | 15 | 65771176  | 65772139  | processed_pseudogene                   | 24,19 | 0         |
| ENSG00000259407 | ENSG00000259407 | 15 | 85744109  | 85750281  | antisense                              | 24,17 | 0         |
| ENSG00000232060 | SLC4A1APP1      | 9  | 30558880  | 30559481  | processed_pseudogene                   | 24,15 | 0         |
| ENSG00000262681 | ENSG00000262681 | 17 | 19719059  | 19722428  | lincRNA                                | 24,10 | 7,06E-02  |
| ENSG00000271670 | ENSG00000271670 | 10 | 120879256 | 120880667 | antisense                              | 24,10 | 0         |
| ENSG00000253716 | MINCR           | 8  | 143280161 | 143281690 | antisense                              | 24,10 | 0         |
| ENSG00000225234 | TRAPPC12-AS1    | 2  | 3481242   | 3482409   | antisense                              | 24,10 | 0         |
| ENSG00000224468 | ENSG00000224468 | 1  | 183138402 | 183141282 | antisense                              | 24,10 | 0         |
| ENSG00000273218 | ENSG00000273218 | 19 | 15346068  | 15348417  | lincRNA                                | 24,00 | 0         |
| ENSG00000257941 | ENSG00000257941 | 12 | 76057538  | 76058115  | processed_pseudogene                   | 24,00 | 0         |
| ENSG00000254429 | ENSG00000254429 | 11 | 75260127  | 75261025  | antisense                              | 24,00 | 0         |
| ENSG00000230091 | TMEM254-AS1     | 10 | 80046860  | 80078912  | antisense                              | 24,00 | 0         |
| ENSG00000218586 | ENSG00000218586 | 7  | 54933699  | 54938184  | processed_pseudogene                   | 24,00 | 0         |
| ENSG00000221971 | TTC4P1          | 7  | 45999621  | 46000778  | processed_pseudogene                   | 24,00 | 0         |
| ENSG00000220412 | ENSG00000220412 | 6  | 137705423 | 137707201 | processed_pseudogene                   | 24,00 | 0         |
| ENSG00000237125 | HAND2-AS1       | 4  | 173527270 | 173591324 | antisense                              | 24,00 | 0         |
| ENSG00000243495 | GMFBP1          | 3  | 100665050 | 100665476 | processed_pseudogene                   | 24,00 | 0         |
| ENSG00000226688 | ENTPD1-AS1      | 10 | 95753206  | 96090238  | antisense                              | 23,92 | 0         |
| ENSG00000236824 | BCYRN1          | 2  | 47331060  | 47344517  | lincRNA                                | 23,90 | 0         |
| ENSG00000239332 | LINC01119       | 2  | 46816697  | 46859007  | lincRNA                                | 23,90 | 0         |
| ENSG00000214331 | ENSG00000214331 | 16 | 74332402  | 74368240  | transcribed_unprocess<br>ed_pseudogene | 23,86 | 0         |
| ENSG00000274925 | ENSG00000274925 | 16 | 25257952  | 25261066  | lincRNA                                | 23,82 | 0         |
| ENSG00000267934 | ENSG00000267934 | 19 | 23323968  | 23329101  | antisense                              | 23,80 | 0         |
| ENSG00000281026 | N4BP2L2-IT2     | 13 | 32504506  | 32509395  | sense_intronic                         | 23,80 | 0         |
| ENSG00000254702 | ENSG00000254702 | 11 | 107736009 | 107738718 | processed_pseudogene                   | 23,80 | 0         |
| ENSG00000267436 | ENSG00000267436 | 19 | 3544199   | 3557569   | antisense                              | 23,78 | 0         |
| ENSG00000259366 | ENSG00000259366 | 8  | 29055935  | 29056685  | sense_intronic                         | 23,78 | 0         |
| ENSG00000237892 | KLF7-IT1        | 2  | 207120884 | 207122044 | sense_intronic                         | 23,77 | 0         |
| ENSG00000214174 | AMZ2P1          | 17 | 64966550  | 64975576  | transcribed_unprocess<br>ed_pseudogene | 23,74 | 0         |
| ENSG00000275367 | ENSG00000275367 | 12 | 8217758   | 8221115   | lincRNA                                | 23,70 | 0         |
| ENSG00000260686 | ENSG00000260686 | 5  | 122832356 | 122834533 | sense_overlapping                      | 23,70 | 0         |
| ENSG00000239880 | ENSG00000239880 | 3  | 180323107 | 180325059 | processed_pseudogene                   | 23,70 | 0,2161218 |
| ENSG00000228384 | ENSG00000228384 | 2  | 70994510  | 71002754  | antisense                              | 23,70 | 0         |
| ENSG00000231105 | ENSG00000231105 | 1  | 21293290  | 21299774  | antisense                              | 23,70 | 0         |
| ENSG00000270017 | ENSG00000270017 | 15 | 94855586  | 94857011  | lincRNA                                | 23,69 | 0,3565078 |
| ENSG00000180015 | ENSG00000180015 | 4  | 188738373 | 188739494 | processed_pseudogene                   | 23,66 | 0         |
| ENSG00000258651 | ENSG00000258651 | 14 | 39103140  | 39103812  | lincRNA                                | 23,64 | 0         |
| ENSG00000231880 | ENSG00000231880 | 11 | 47577725  | 47578277  | antisense                              | 23,63 | 0         |
| ENSG00000236152 | MRPS36P1        | 3  | 6773037   | 6773343   | processed_pseudogene                   | 23,60 | 0         |
| ENSG00000273387 | ENSG00000273387 | 22 | 31082156  | 31083565  | antisense                              | 23,60 | 0         |
| ENSG00000266777 | SH3GL1P1        | 17 | 32039974  | 32042828  | transcribed_processed_<br>pseudogene   | 23,60 | 0         |
| ENSG00000267002 | ENSG00000267002 | 17 | 43148368  | 43171037  | lincRNA                                | 23,60 | 0         |
| ENSG00000248441 | LINC01197       | 15 | 95209099  | 95327129  | lincRNA                                | 23,60 | 0         |
| ENSG00000253477 | ENSG00000253477 | 8  | 103483398 | 103501676 | antisense                              | 23,60 | 0         |
| ENSG00000251553 | ENSG00000251553 | 5  | 98679402  | 98681367  | processed_pseudogene                   | 23,58 | 0         |
| ENSG00000227105 | PARP1P1         | 13 | 110936759 | 110939784 | processed_pseudogene                   | 23,56 | 0         |
| ENSG00000267904 | ENSG00000267904 | 19 | 16639967  | 16640668  | sense_intronic                         | 23,50 | 0         |

|                 |                 |    |           |           |                                    |       |          |
|-----------------|-----------------|----|-----------|-----------|------------------------------------|-------|----------|
| ENSG00000263753 | LINC00667       | 18 | 5237826   | 5246508   | lincRNA                            | 23,50 | 0        |
| ENSG00000264012 | ENSG00000264012 | 18 | 22175465  | 22176662  | antisense                          | 23,50 | 0        |
| ENSG00000258701 | LINC00638       | 14 | 104821201 | 104823718 | lincRNA                            | 23,50 | 0        |
| ENSG00000255224 | ENSG00000255224 | 8  | 144078002 | 144079265 | antisense                          | 23,41 | 0        |
| ENSG00000261270 | ENSG00000261270 | 16 | 56940278  | 56941342  | sense_intronic                     | 23,40 | 0        |
| ENSG00000270028 | ENSG00000270028 | 12 | 123925461 | 123926083 | antisense                          | 23,40 | 0        |
| ENSG00000229593 | SUCLA2P3        | 2  | 25079901  | 25081689  | processed_pseudogene               | 23,40 | 0        |
| ENSG00000256813 | ENSG00000256813 | 11 | 60841806  | 60851081  | antisense                          | 23,36 | 0        |
| ENSG00000276663 | ENSG00000276663 | 16 | 57245832  | 57246396  | antisense                          | 23,32 | 0        |
| ENSG00000241218 | ENSG00000241218 | 3  | 107327830 | 107329197 | processed_pseudogene               | 23,30 | 0        |
| ENSG00000235862 | ENSG00000235862 | 1  | 212624284 | 212626771 | antisense                          | 23,30 | 0        |
| ENSG00000270231 | NBPF8           | 1  | 120436353 | 120467739 | unprocessed_pseudogene             | 23,28 | 0        |
| ENSG00000226245 | ZNF32-AS1       | 10 | 43643872  | 43645047  | antisense                          | 23,26 | 0        |
| ENSG00000257769 | ENSG00000257769 | 16 | 15608474  | 15610563  | antisense                          | 23,25 | 0        |
| ENSG00000254578 | ENSG00000254578 | 8  | 144463817 | 144465101 | antisense                          | 23,20 | 0        |
| ENSG00000177173 | NAP1L4P1        | 1  | 116532936 | 116534092 | processed_pseudogene               | 23,09 | 0        |
| ENSG00000267078 | ENSG00000267078 | 17 | 76569792  | 76571240  | antisense                          | 23,00 | 0        |
| ENSG00000240338 | ENSG00000240338 | 16 | 75226074  | 75228197  | transcribed_unprocessed_pseudogene | 23,00 | 1,40E-02 |
| ENSG00000259954 | IL21R-AS1       | 16 | 27447669  | 27453393  | antisense                          | 23,00 | 0        |
| ENSG00000256661 | A2ML1-AS1       | 12 | 8776219   | 8830947   | antisense                          | 23,00 | 0        |
| ENSG00000261428 | ENSG00000261428 | 2  | 222566899 | 222569719 | antisense                          | 23,00 | 0        |
| ENSG00000259605 | ENSG00000259605 | 19 | 45764785  | 45769806  | processed_transcript               | 22,93 | 0        |
| ENSG00000258988 | ENSG00000258988 | 14 | 67199062  | 67200327  | processed_pseudogene               | 22,92 | 0        |
| ENSG00000260657 | ENSG00000260657 | 15 | 68267792  | 68277994  | lincRNA                            | 22,90 | 0        |
| ENSG00000230438 | SERPINB9P1      | 6  | 2854657   | 2881407   | lincRNA                            | 22,90 | 0        |
| ENSG00000227799 | ENSG00000227799 | 2  | 55224280  | 55225908  | processed_pseudogene               | 22,90 | 0        |
| ENSG00000243762 | ENSG00000243762 | 22 | 20110821  | 20111875  | antisense                          | 22,83 | 0        |
| ENSG00000265393 | ENSG00000265393 | 8  | 144512567 | 144513672 | antisense                          | 22,82 | 0        |
| ENSG00000258101 | ENSG00000258101 | 12 | 49232790  | 49264756  | antisense                          | 22,80 | 0        |
| ENSG00000278266 | ENSG00000278266 | 12 | 127147149 | 127150081 | lincRNA                            | 22,77 | 0        |
| ENSG00000267218 | ENSG00000267218 | 19 | 15902300  | 15903238  | processed_pseudogene               | 22,75 | 0        |
| ENSG00000273311 | DGCR11          | 22 | 19046162  | 19048375  | sense_intronic                     | 22,70 | 0        |
| ENSG00000183250 | LINC01547       | 21 | 44932814  | 44939913  | lincRNA                            | 22,69 | 0        |
| ENSG00000234171 | RNASEH1-AS1     | 2  | 3558492   | 3561745   | antisense                          | 22,69 | 0        |
| ENSG00000229562 | ZFYVE9P1        | X  | 137660519 | 137662242 | processed_pseudogene               | 22,69 | 0        |
| ENSG00000180581 | SRP9P1          | 10 | 91807179  | 91807439  | processed_pseudogene               | 22,64 | 0        |
| ENSG00000266261 | ENSG00000266261 | 17 | 15651590  | 15654489  | antisense                          | 22,60 | 0        |
| ENSG00000243236 | GSTA9P          | 6  | 52939726  | 52957521  | transcribed_unprocessed_pseudogene | 22,60 | 0        |
| ENSG00000281832 | LINC00602       | 6  | 165987551 | 165989615 | lincRNA                            | 22,60 | 0        |
| ENSG00000175749 | EIF3KP1         | 5  | 103032376 | 103033031 | processed_pseudogene               | 22,60 | 7,06E-02 |
| ENSG00000255031 | ENSG00000255031 | 11 | 68050740  | 68053762  | antisense                          | 22,56 | 0        |
| ENSG00000275197 | ENSG00000275197 | 12 | 25225103  | 25225665  | antisense                          | 22,56 | 0        |
| ENSG00000205663 | ENSG00000205663 | X  | 3891438   | 3920746   | lincRNA                            | 22,55 | 3,30E-03 |
| ENSG00000224328 | MDC1-AS1        | 6  | 30703067  | 30713184  | antisense                          | 22,50 | 0        |
| ENSG00000256667 | KLRAP1          | 12 | 10588063  | 10599669  | transcribed_unprocessed_pseudogene | 22,47 | 0        |
| ENSG00000259940 | ENSG00000259940 | 16 | 27213308  | 27214993  | antisense                          | 22,40 | 0        |
| ENSG00000234685 | NUS1P2          | 13 | 22915651  | 22916523  | processed_pseudogene               | 22,40 | 0        |
| ENSG00000270689 | BUD13P1         | 11 | 95143637  | 95145125  | processed_pseudogene               | 22,40 | 0        |
| ENSG00000237437 | ASS1P12         | 9  | 32945996  | 32947222  | processed_pseudogene               | 22,40 | 0        |
| ENSG00000272505 | ENSG00000272505 | 8  | 10486807  | 10489666  | lincRNA                            | 22,40 | 0        |
| ENSG00000248664 | ENSG00000248664 | 5  | 69113112  | 69136394  | antisense                          | 22,39 | 0        |
| ENSG00000278769 | ENSG00000278769 | 15 | 42724102  | 42724922  | antisense                          | 22,38 | 0        |
| ENSG00000255449 | ENSG00000255449 | 11 | 77866412  | 77870091  | antisense                          | 22,36 | 0        |
| ENSG00000279210 | ENSG00000279210 | 1  | 178479247 | 178482365 | antisense                          | 22,31 | 0        |
| ENSG00000257896 | ENSG00000257896 | 12 | 43736628  | 43741067  | transcribed_unprocessed_pseudogene | 22,30 | 0        |
| ENSG00000273329 | ENSG00000273329 | 7  | 129604548 | 129611630 | lincRNA                            | 22,29 | 0        |

|                 |                 |    |           |           |                                    |       |           |
|-----------------|-----------------|----|-----------|-----------|------------------------------------|-------|-----------|
| ENSG00000239689 | RPL17P46        | 18 | 50823577  | 50824120  | processed_pseudogene               | 22,20 | 0         |
| ENSG00000267233 | HNRNPA3P16      | 18 | 50814392  | 50815730  | processed_pseudogene               | 22,20 | 0         |
| ENSG00000259750 | ENSG00000259750 | 15 | 59401221  | 59402004  | processed_pseudogene               | 22,20 | 0,2161218 |
| ENSG00000278126 | ENSG00000278126 | 12 | 51201684  | 51202581  | sense_intronic                     | 22,20 | 0         |
| ENSG00000269153 | LYPLA2P2        | 19 | 7879445   | 7880120   | processed_pseudogene               | 22,16 | 0         |
| ENSG00000278530 | CHMP1B2P        | X  | 80228489  | 80335364  | unitary_pseudogene                 | 22,15 | 0         |
| ENSG00000239801 | DENND6A-AS1     | 3  | 57628810  | 57654918  | antisense                          | 22,13 | 0         |
| ENSG00000242659 | ENSG00000242659 | 3  | 113746872 | 113747408 | lincRNA                            | 22,10 | 0         |
| ENSG00000224072 | ENSG00000224072 | X  | 46454097  | 46457199  | processed_pseudogene               | 22,10 | 1,40E-02  |
| ENSG00000259079 | ENSG00000259079 | 14 | 71330342  | 71330738  | processed_pseudogene               | 22,08 | 0         |
| ENSG00000273262 | ENSG00000273262 | 10 | 102483039 | 102483559 | antisense                          | 22,03 | 0         |
| ENSG00000235095 | ENSG00000235095 | 7  | 57147986  | 57150347  | unprocessed_pseudogene             | 22,01 | 0         |
| ENSG00000235374 | SSR4P1          | 21 | 45070952  | 45074165  | transcribed_processed_pseudogene   | 22,00 | 0         |
| ENSG00000204850 | ENSG00000204850 | 19 | 46494508  | 46496502  | antisense                          | 22,00 | 0         |
| ENSG00000268573 | ENSG00000268573 | 18 | 35280867  | 35290201  | lincRNA                            | 22,00 | 0         |
| ENSG00000230325 | ENSG00000230325 | 1  | 236540094 | 236550280 | antisense                          | 22,00 | 0         |
| ENSG00000225610 | ENSG00000225610 | 2  | 205989585 | 206000858 | antisense                          | 21,94 | 0         |
| ENSG00000272836 | ENSG00000272836 | 22 | 50205585  | 50206062  | antisense                          | 21,90 | 0         |
| ENSG00000272849 | ENSG00000272849 | 12 | 121797511 | 121801972 | lincRNA                            | 21,90 | 0         |
| ENSG00000238109 | ENSG00000238109 | 7  | 98998538  | 98999930  | processed_pseudogene               | 21,90 | 1,40E-02  |
| ENSG00000271862 | ENSG00000271862 | 5  | 83049376  | 83050964  | lincRNA                            | 21,90 | 0         |
| ENSG00000229939 | ENSG00000229939 | X  | 111618808 | 111619094 | processed_pseudogene               | 21,90 | 0         |
| ENSG00000174353 | STAG3L3         | 7  | 72969696  | 73005922  | transcribed_unprocessed_pseudogene | 21,89 | 0         |
| ENSG00000226803 | ENSG00000226803 | 6  | 57114894  | 57174236  | antisense                          | 21,87 | 0         |
| ENSG00000235354 | ENSG00000235354 | 7  | 103348601 | 103348771 | processed_pseudogene               | 21,87 | 3,30E-03  |
| ENSG00000267156 | TPMTP1          | 18 | 47630112  | 47630848  | processed_pseudogene               | 21,87 | 0         |
| ENSG00000259367 | ENSG00000259367 | 15 | 85619623  | 85670948  | antisense                          | 21,80 | 0         |
| ENSG00000171889 | MIR31HG         | 9  | 21455642  | 21559669  | sense_overlapping                  | 21,80 | 0         |
| ENSG00000271913 | ENSG00000271913 | 6  | 158988178 | 159064925 | antisense                          | 21,80 | 0         |
| ENSG00000271895 | ENSG00000271895 | 1  | 11029659  | 11030528  | antisense                          | 21,80 | 0         |
| ENSG00000269019 | ENSG00000269019 | 19 | 18940322  | 18946831  | antisense                          | 21,70 | 0         |
| ENSG00000221844 | DPP3P2          | 9  | 73474378  | 73476073  | processed_pseudogene               | 21,70 | 0,2161218 |
| ENSG00000215270 | ENSG00000215270 | 22 | 15854195  | 15855243  | processed_pseudogene               | 21,60 | 0         |
| ENSG00000260425 | ENSG00000260425 | 16 | 1358900   | 1361405   | antisense                          | 21,60 | 0         |
| ENSG00000259327 | ENSG00000259327 | 15 | 52116574  | 52122131  | lincRNA                            | 21,60 | 0         |
| ENSG00000204188 | GGNBP1          | 6  | 33540046  | 33589026  | unitary_pseudogene                 | 21,60 | 0         |
| ENSG00000240194 | CYMP            | 1  | 110480752 | 110491277 | unitary_pseudogene                 | 21,60 | 7,06E-02  |
| ENSG00000241720 | ENSG00000241720 | 1  | 109725820 | 109775252 | antisense                          | 21,59 | 0         |
| ENSG00000223390 | ENSG00000223390 | 1  | 52033391  | 52044279  | antisense                          | 21,59 | 0         |
| ENSG00000251204 | ENSG00000251204 | 5  | 106415576 | 106417241 | processed_pseudogene               | 21,58 | 0         |
| ENSG00000238041 | ENSG00000238041 | 11 | 56690465  | 56690723  | processed_pseudogene               | 21,57 | 0         |
| ENSG00000245694 | CRNDE           | 16 | 54918863  | 54929189  | lincRNA                            | 21,52 | 0         |
| ENSG00000268093 | ENSG00000268093 | 19 | 48619272  | 48624132  | antisense                          | 21,50 | 0         |
| ENSG00000236539 | HNRNPA1P54      | 1  | 179447602 | 179457315 | processed_pseudogene               | 21,50 | 0,2161218 |
| ENSG00000271182 | ENSG00000271182 | 19 | 21634833  | 21635175  | processed_pseudogene               | 21,46 | 0         |
| ENSG00000213090 | ENSG00000213090 | 2  | 201410544 | 201413308 | processed_pseudogene               | 21,46 | 0         |
| ENSG00000213260 | YWHAZP5         | 10 | 105686322 | 105687051 | processed_pseudogene               | 21,45 | 0         |
| ENSG00000215067 | ALOX12-AS1      | 17 | 6876635   | 7012349   | antisense                          | 21,44 | 0         |
| ENSG00000246851 | ENSG00000246851 | 9  | 131189910 | 131194205 | antisense                          | 21,44 | 0         |
| ENSG00000229766 | ENSG00000229766 | 20 | 8019223   | 8043512   | antisense                          | 21,40 | 0         |
| ENSG00000258457 | ENSG00000258457 | 14 | 22982698  | 22999078  | antisense                          | 21,40 | 0         |
| ENSG00000258682 | ENSG00000258682 | 14 | 58264662  | 58269681  | sense_overlapping                  | 21,40 | 0         |
| ENSG00000245498 | ENSG00000245498 | 11 | 124800450 | 124834487 | antisense                          | 21,38 | 0         |
| ENSG00000261069 | ENSG00000261069 | 15 | 25087661  | 25088896  | lincRNA                            | 21,37 | 0         |
| ENSG00000223697 | ENSG00000223697 | 8  | 132838117 | 132844298 | antisense                          | 21,34 | 0         |
| ENSG00000213962 | API5P2          | 2  | 177997273 | 177998770 | processed_pseudogene               | 21,33 | 0         |
| ENSG00000263812 | LINC00908       | 18 | 76528655  | 76610968  | lincRNA                            | 21,30 | 0         |
| ENSG00000261924 | ENSG00000261924 | 17 | 80966239  | 80971213  | antisense                          | 21,27 | 6,27E-03  |

|                 |                 |    |           |           |                                  |       |           |
|-----------------|-----------------|----|-----------|-----------|----------------------------------|-------|-----------|
| ENSG00000197815 | ENSG00000197815 | 17 | 17858227  | 17860041  | antisense                        | 21,20 | 0         |
| ENSG00000271105 | SCML2P2         | 16 | 25069570  | 25070109  | processed_pseudogene             | 21,20 | 0         |
| ENSG00000234432 | ENSG00000234432 | 7  | 5426277   | 5428927   | lincRNA                          | 21,20 | 0         |
| ENSG00000212694 | LINC01089       | 12 | 121795267 | 121803906 | lincRNA                          | 21,19 | 0         |
| ENSG00000260401 | ENSG00000260401 | 11 | 73238975  | 73242335  | sense_overlapping                | 21,17 | 0         |
| ENSG00000275854 | ENSG00000275854 | 12 | 32736930  | 32737660  | sense_intronic                   | 21,13 | 0         |
| ENSG00000177335 | C8orf31         | 8  | 143039209 | 143059942 | processed_transcript             | 21,13 | 0         |
| ENSG00000256806 | C17orf100       | 17 | 6651718   | 6693202   | lincRNA                          | 21,12 | 0         |
| ENSG00000277496 | ENSG00000277496 | 20 | 62648961  | 62650767  | antisense                        | 21,10 | 0         |
| ENSG00000242615 | ENSG00000242615 | 19 | 12141806  | 12143322  | transcribed_processed_pseudogene | 21,10 | 0         |
| ENSG00000244198 | ENSG00000244198 | 7  | 144194858 | 144280547 | antisense                        | 21,10 | 0         |
| ENSG00000224318 | CHL1-AS2        | 3  | 195758    | 197341    | processed_transcript             | 21,10 | 0         |
| ENSG00000228925 | ENSG00000228925 | 2  | 46899275  | 46908678  | antisense                        | 21,07 | 0         |
| ENSG00000268056 | ENSG00000268056 | 19 | 17152588  | 17168051  | antisense                        | 21,05 | 0         |
| ENSG00000252690 | SCARNA15        | 15 | 82752884  | 82757208  | processed_transcript             | 21,00 | 0         |
| ENSG00000259696 | ENSG00000259696 | 15 | 31453201  | 31454139  | processed_pseudogene             | 21,00 | 0         |
| ENSG00000230953 | ENSG00000230953 | 1  | 52920422  | 52920596  | processed_pseudogene             | 21,00 | 0         |
| ENSG00000233937 | ENSG00000233937 | 5  | 181246523 | 181272167 | processed_transcript             | 20,95 | 0         |
| ENSG00000260114 | ENSG00000260114 | 16 | 29919634  | 29921905  | sense_intronic                   | 20,93 | 0         |
| ENSG00000265784 | ENSG00000265784 | 17 | 38918801  | 38921769  | antisense                        | 20,91 | 0         |
| ENSG00000265487 | ENSG00000265487 | 18 | 5956101   | 5960785   | antisense                        | 20,90 | 0         |
| ENSG00000261542 | ENSG00000261542 | 8  | 63215981  | 63218034  | lincRNA                          | 20,83 | 0         |
| ENSG00000213430 | HSPD1P1         | 5  | 21882585  | 21884310  | processed_pseudogene             | 20,83 | 0         |
| ENSG00000230590 | FTX             | X  | 73963955  | 74293574  | lincRNA                          | 20,82 | 0         |
| ENSG00000266501 | ENSG00000266501 | 17 | 73067870  | 73068288  | processed_pseudogene             | 20,81 | 0         |
| ENSG00000234567 | ENSG00000234567 | 6  | 133452857 | 133456605 | antisense                        | 20,80 | 0         |
| ENSG00000267919 | ENSG00000267919 | 2  | 219645090 | 219645631 | lincRNA                          | 20,80 | 0         |
| ENSG00000226711 | FAM66C          | 12 | 8180209   | 8216151   | antisense                        | 20,77 | 0         |
| ENSG00000242622 | ENSG00000242622 | 3  | 120094895 | 120136783 | lincRNA                          | 20,73 | 0         |
| ENSG00000255198 | SNHG9           | 16 | 1964959   | 1965509   | lincRNA                          | 20,71 | 3,30E-03  |
| ENSG00000273300 | ENSG00000273300 | 22 | 19454179  | 19454605  | antisense                        | 20,70 | 0         |
| ENSG00000269890 | ENSG00000269890 | 1  | 228270443 | 228274397 | antisense                        | 20,70 | 0         |
| ENSG00000229358 | DPY19L1P1       | 7  | 32580949  | 32761787  | unprocessed_pseudogene           | 20,70 | 0         |
| ENSG00000247570 | SDCBPP2         | 8  | 69942948  | 69944648  | processed_pseudogene             | 20,67 | 0         |
| ENSG00000228819 | ENSG00000228819 | X  | 132130091 | 132131352 | processed_pseudogene             | 20,67 | 0,3318209 |
| ENSG00000224413 | ENSG00000224413 | 21 | 46037052  | 46039807  | lincRNA                          | 20,60 | 0         |
| ENSG00000267727 | ENSG00000267727 | 19 | 33301279  | 33301940  | antisense                        | 20,60 | 0         |
| ENSG00000272240 | ENSG00000272240 | 8  | 234347    | 234887    | antisense                        | 20,60 | 0         |
| ENSG00000233221 | ENSG00000233221 | 2  | 130830978 | 130836994 | antisense                        | 20,60 | 0         |
| ENSG00000237206 | IMPDH1P4        | X  | 43278125  | 43279658  | processed_pseudogene             | 20,60 | 0         |
| ENSG00000227176 | ENSG00000227176 | 2  | 170077224 | 170078294 | processed_pseudogene             | 20,56 | 0         |
| ENSG00000253213 | ENSG00000253213 | 5  | 171251866 | 171252982 | processed_pseudogene             | 20,50 | 0         |
| ENSG00000244932 | ENSG00000244932 | 3  | 129381298 | 129394149 | unprocessed_pseudogene           | 20,50 | 0         |
| ENSG00000228335 | ENSG00000228335 | 7  | 99442890  | 99443496  | processed_pseudogene             | 20,49 | 0         |
| ENSG00000228717 | ENSG00000228717 | X  | 151226229 | 151227715 | processed_pseudogene             | 20,43 | 0         |
| ENSG00000239665 | ENSG00000239665 | 10 | 13631143  | 13668445  | processed_transcript             | 20,42 | 0         |
| ENSG00000271020 | ENSG00000271020 | 3  | 33797149  | 33797681  | lincRNA                          | 20,42 | 0         |
| ENSG00000227252 | ENSG00000227252 | 2  | 237059434 | 237085817 | antisense                        | 20,40 | 0         |
| ENSG00000230415 | ENSG00000230415 | 1  | 1275223   | 1280420   | lincRNA                          | 20,40 | 0         |
| ENSG00000256073 | URB1-AS1        | 21 | 32393130  | 32393960  | lincRNA                          | 20,39 | 0         |
| ENSG00000231549 | USMG5P1         | X  | 74173890  | 74174066  | processed_pseudogene             | 20,39 | 0         |
| ENSG00000225791 | TRAM2-AS1       | 6  | 52577307  | 52583993  | lincRNA                          | 20,36 | 0         |
| ENSG00000260236 | ENSG00000260236 | 3  | 47379089  | 47380999  | antisense                        | 20,36 | 0         |
| ENSG00000281205 | LINC00950       | 9  | 35858738  | 35865518  | lincRNA                          | 20,31 | 0         |
| ENSG00000269051 | ENSG00000269051 | 19 | 53197111  | 53211015  | lincRNA                          | 20,30 | 0         |
| ENSG00000261208 | ENSG00000261208 | 14 | 52286797  | 52289268  | processed_pseudogene             | 20,30 | 7,06E-02  |
| ENSG00000254595 | ENSG00000254595 | 11 | 6488186   | 6489377   | processed_pseudogene             | 20,30 | 0         |

|                 |                 |    |           |           |                                    |       |           |
|-----------------|-----------------|----|-----------|-----------|------------------------------------|-------|-----------|
| ENSG00000227775 | ENSG00000227775 | 1  | 1724512   | 1737251   | transcribed_processed_pseudogene   | 20,22 | 0         |
| ENSG00000261438 | ENSG00000261438 | 10 | 89015836  | 89017059  | sense_overlapping                  | 20,20 | 0         |
| ENSG00000250846 | EPHA5-AS1       | 4  | 65669961  | 65698029  | lincRNA                            | 20,20 | 0         |
| ENSG00000224884 | ENSG00000224884 | 3  | 8573726   | 8593124   | lincRNA                            | 20,20 | 0         |
| ENSG00000259683 | ENSG00000259683 | 15 | 84389729  | 84395903  | unprocessed_pseudogene             | 20,15 | 0         |
| ENSG00000253785 | ENSG00000253785 | 5  | 172975511 | 172976374 | processed_pseudogene               | 20,12 | 0         |
| ENSG00000272733 | ENSG00000272733 | 22 | 23580880  | 23583859  | lincRNA                            | 20,10 | 0         |
| ENSG00000240970 | RPL23AP64       | 11 | 119003012 | 119003446 | processed_pseudogene               | 20,10 | 0         |
| ENSG00000247416 | ENSG00000247416 | 11 | 112959279 | 112963460 | antisense                          | 20,10 | 0         |
| ENSG00000261051 | ENSG00000261051 | 3  | 146059585 | 146061679 | sense_overlapping                  | 20,10 | 0         |
| ENSG00000227295 | ELL2P1          | 1  | 158175850 | 158177755 | processed_pseudogene               | 20,03 | 0         |
| ENSG00000268203 | ENSG00000268203 | 19 | 6494320   | 6494805   | antisense                          | 20,00 | 0         |
| ENSG00000181227 | ENSG00000181227 | 1  | 75743423  | 75744776  | processed_pseudogene               | 19,96 | 0         |
| ENSG00000188512 | ENSG00000188512 | 8  | 33969567  | 33969879  | processed_pseudogene               | 19,93 | 0         |
| ENSG00000213985 | ENSG00000213985 | 19 | 20257720  | 20259418  | processed_pseudogene               | 19,92 | 0         |
| ENSG00000270060 | ENSG00000270060 | 11 | 47168281  | 47169563  | sense_intronic                     | 19,90 | 0         |
| ENSG00000250569 | NTAN1P2         | 8  | 86481754  | 86483002  | processed_pseudogene               | 19,90 | 0         |
| ENSG00000258365 | ENSG00000258365 | 12 | 94277758  | 94282844  | antisense                          | 19,82 | 0         |
| ENSG00000259562 | ENSG00000259562 | 15 | 78290527  | 78291221  | transcribed_processed_pseudogene   | 19,80 | 0         |
| ENSG00000225333 | ENSG00000225333 | 1  | 39718028  | 39718595  | processed_pseudogene               | 19,80 | 0,2161218 |
| ENSG00000276136 | ENSG00000276136 | 12 | 32000375  | 32001222  | lincRNA                            | 19,70 | 0         |
| ENSG00000270441 | ENSG00000270441 | 3  | 49140086  | 49160851  | unprocessed_pseudogene             | 19,69 | 0         |
| ENSG00000258359 | PCNPP1          | 12 | 111669852 | 111670362 | processed_pseudogene               | 19,69 | 0,1392851 |
| ENSG00000211451 | GNRHR2          | 1  | 145919013 | 145925341 | unitary_pseudogene                 | 19,67 | 0         |
| ENSG00000257497 | ENSG00000257497 | 12 | 75483454  | 75489820  | antisense                          | 19,64 | 0         |
| ENSG00000236216 | PPP1R11P1       | 1  | 21397987  | 21398362  | processed_pseudogene               | 19,64 | 0         |
| ENSG00000267342 | ENSG00000267342 | 17 | 75897060  | 75900148  | antisense                          | 19,61 | 0         |
| ENSG00000249740 | OSMR-AS1        | 5  | 38736055  | 38845829  | lincRNA                            | 19,60 | 0         |
| ENSG00000224728 | ENSG00000224728 | 3  | 15878047  | 15879571  | processed_pseudogene               | 19,60 | 0         |
| ENSG00000231365 | ENSG00000231365 | 1  | 119140396 | 119275973 | antisense                          | 19,55 | 0         |
| ENSG00000257674 | ENSG00000257674 | 12 | 42286911  | 42288560  | processed_pseudogene               | 19,54 | 0         |
| ENSG00000247317 | ENSG00000247317 | 8  | 142981738 | 143018437 | lincRNA                            | 19,53 | 0         |
| ENSG00000214425 | LRR37A4P        | 17 | 45506741  | 45550335  | transcribed_unprocessed_pseudogene | 19,50 | 0         |
| ENSG00000260381 | ENSG00000260381 | 16 | 50100339  | 50121943  | antisense                          | 19,50 | 0         |
| ENSG00000259052 | ENSG00000259052 | 14 | 100279959 | 100291456 | sense_overlapping                  | 19,50 | 0         |
| ENSG00000256075 | ENSG00000256075 | 12 | 68473741  | 68474902  | processed_pseudogene               | 19,50 | 0         |
| ENSG00000250959 | GLUD1P3         | 10 | 73730562  | 73737311  | transcribed_unprocessed_pseudogene | 19,50 | 0         |
| ENSG00000224025 | ENSG00000224025 | 9  | 68609125  | 68611984  | processed_pseudogene               | 19,50 | 0         |
| ENSG00000280543 | ASAP1-IT2       | 8  | 130082738 | 130084768 | sense_intronic                     | 19,50 | 0         |
| ENSG00000234123 | RHBD1P1         | 3  | 14572852  | 14574792  | processed_pseudogene               | 19,50 | 1,40E-02  |
| ENSG00000121089 | NACA3P          | 4  | 164943290 | 164943937 | processed_pseudogene               | 19,49 | 0         |
| ENSG00000229091 | HSPA8P8         | 7  | 10451311  | 10453252  | processed_pseudogene               | 19,48 | 0         |
| ENSG00000230756 | RHOQP3          | 2  | 130212870 | 130213490 | processed_pseudogene               | 19,47 | 0         |
| ENSG00000250909 | ENSG00000250909 | 5  | 176347941 | 176353584 | antisense                          | 19,46 | 0         |
| ENSG00000234500 | ENSG00000234500 | 7  | 66511556  | 66545066  | unprocessed_pseudogene             | 19,45 | 0         |
| ENSG00000234084 | ENSG00000234084 | 6  | 135301568 | 135307158 | antisense                          | 19,45 | 0         |
| ENSG00000251032 | CUL1P1          | 5  | 127784618 | 127787042 | processed_pseudogene               | 19,43 | 0         |
| ENSG00000213344 | PCNPP3          | 12 | 65645992  | 65646462  | processed_pseudogene               | 19,40 | 7,06E-02  |
| ENSG00000272871 | ENSG00000272871 | 9  | 14588797  | 14590065  | lincRNA                            | 19,40 | 0         |
| ENSG00000214846 | ENSG00000214846 | 4  | 15730962  | 15731627  | processed_pseudogene               | 19,40 | 7,06E-02  |
| ENSG00000240524 | ENSG00000240524 | 1  | 229270927 | 229271599 | transcribed_processed_pseudogene   | 19,38 | 0         |
| ENSG00000260617 | ENSG00000260617 | 16 | 88741631  | 88742367  | antisense                          | 19,33 | 0         |
| ENSG00000251867 | ENSG00000251867 | 8  | 80484561  | 80485619  | antisense                          | 19,32 | 0         |



|                 |                 |    |           |           |                                        |       |           |
|-----------------|-----------------|----|-----------|-----------|----------------------------------------|-------|-----------|
| ENSG00000229689 | ENSG00000229689 | 2  | 95525345  | 95532405  | transcribed_unprocess<br>ed_pseudogene | 19,31 | 0         |
| ENSG00000234892 | ENSG00000234892 | 22 | 43232141  | 43239010  | antisense                              | 19,30 | 0         |
| ENSG00000269399 | ENSG00000269399 | 19 | 16542746  | 16544814  | lincRNA                                | 19,30 | 0         |
| ENSG00000273447 | ENSG00000273447 | 4  | 109692004 | 109692703 | antisense                              | 19,30 | 0         |
| ENSG00000231327 | ENSG00000231327 | 2  | 70124036  | 70125317  | lincRNA                                | 19,25 | 0         |
| ENSG00000224186 | C5orf66         | 5  | 135033280 | 135358219 | antisense                              | 19,25 | 0         |
| ENSG00000265840 | ENSG00000265840 | 17 | 28749731  | 28750079  | antisense                              | 19,23 | 0         |
| ENSG00000265417 | ENSG00000265417 | 18 | 1362445   | 1363873   | processed_pseudogene                   | 19,22 | 0         |
| ENSG00000262413 | ENSG00000262413 | 17 | 81867721  | 81868552  | antisense                              | 19,21 | 0         |
| ENSG00000256433 | ENSG00000256433 | 12 | 6393905   | 6396148   | lincRNA                                | 19,20 | 0         |
| ENSG00000233237 | LINC00472       | 6  | 71344344  | 71420769  | lincRNA                                | 19,20 | 0         |
| ENSG00000274877 | ENSG00000274877 | 2  | 113237595 | 113240825 | antisense                              | 19,20 | 0         |
| ENSG00000180284 | ENSG00000180284 | X  | 103651735 | 103652106 | processed_pseudogene                   | 19,20 | 0         |
| ENSG00000259661 | ENSG00000259661 | 15 | 90920218  | 90921186  | antisense                              | 19,13 | 0         |
| ENSG00000233087 | ENSG00000233087 | 2  | 131362956 | 131363720 | transcribed_processed_<br>pseudogene   | 19,11 | 0         |
| ENSG00000258891 | ENSG00000258891 | 14 | 73896164  | 73938114  | antisense                              | 19,11 | 0         |
| ENSG00000272072 | ENSG00000272072 | 7  | 107192559 | 107193300 | antisense                              | 19,10 | 0         |
| ENSG00000251414 | ENSG00000251414 | 5  | 176354206 | 176356168 | antisense                              | 19,10 | 0         |
| ENSG00000224272 | ENSG00000224272 | 2  | 241808312 | 241812016 | antisense                              | 19,10 | 0         |
| ENSG00000236364 | ENSG00000236364 | 1  | 165890795 | 165900683 | antisense                              | 19,06 | 0         |
| ENSG00000205771 | CATSPER2P1      | 15 | 43726918  | 43747094  | transcribed_unprocess<br>ed_pseudogene | 19,04 | 0         |
| ENSG00000269481 | ENSG00000269481 | 19 | 17414257  | 17422324  | antisense                              | 19,00 | 0         |
| ENSG00000226890 | ENSG00000226890 | 16 | 1625628   | 1626160   | antisense                              | 19,00 | 0         |
| ENSG00000271815 | ENSG00000271815 | 5  | 75363760  | 75364242  | lincRNA                                | 19,00 | 0         |
| ENSG00000250325 | IGBP1P4         | 4  | 82401578  | 82402456  | processed_pseudogene                   | 19,00 | 1,40E-02  |
| ENSG00000237940 | ENSG00000237940 | 2  | 241970683 | 241977276 | lincRNA                                | 19,00 | 0         |
| ENSG00000230896 | ENSG00000230896 | 1  | 45694684  | 45697075  | sense_intronic                         | 19,00 | 0         |
| ENSG00000234072 | ENSG00000234072 | 2  | 27356246  | 27367622  | antisense                              | 18,98 | 0         |
| ENSG00000272267 | ENSG00000272267 | 8  | 9555144   | 9556520   | antisense                              | 18,96 | 0         |
| ENSG00000223984 | HNRNPRP1        | 10 | 21624592  | 21626286  | processed_pseudogene                   | 18,95 | 0         |
| ENSG00000225355 | ARL6IP1P2       | 10 | 36995023  | 36995585  | processed_pseudogene                   | 18,92 | 0         |
| ENSG00000217414 | ENSG00000217414 | 6  | 18363417  | 18365423  | processed_pseudogene                   | 18,91 | 0         |
| ENSG00000226143 | ENSG00000226143 | 20 | 43549389  | 43550949  | antisense                              | 18,90 | 0         |
| ENSG00000256164 | CCND2-AS1       | 12 | 4248765   | 4276184   | antisense                              | 18,90 | 0         |
| ENSG00000256673 | ENSG00000256673 | 12 | 9398355   | 9414851   | unprocessed_pseudoge<br>ne             | 18,90 | 0         |
| ENSG00000231655 | ENSG00000231655 | 2  | 26140263  | 26141264  | processed_pseudogene                   | 18,90 | 1,40E-02  |
| ENSG00000185031 | SLC2A3P2        | 1  | 64984608  | 64986087  | processed_pseudogene                   | 18,90 | 0         |
| ENSG00000227496 | ENSG00000227496 | 1  | 225700604 | 225752243 | antisense                              | 18,90 | 0         |
| ENSG00000270127 | ENSG00000270127 | 15 | 100547765 | 100550153 | lincRNA                                | 18,82 | 0         |
| ENSG00000259668 | ENSG00000259668 | 15 | 51457286  | 51460582  | antisense                              | 18,81 | 0         |
| ENSG00000256704 | SDCCAG3P1       | 18 | 60009994  | 60011143  | processed_pseudogene                   | 18,80 | 0,2161218 |
| ENSG00000261067 | ENSG00000261067 | 16 | 28974804  | 28990783  | processed_transcript                   | 18,80 | 0         |
| ENSG00000236548 | RNF217-AS1      | 6  | 124909093 | 124963039 | antisense                              | 18,80 | 0         |
| ENSG00000258451 | ENSG00000258451 | 14 | 20693480  | 20707120  | antisense                              | 18,79 | 0         |
| ENSG00000267253 | ENSG00000267253 | 17 | 43718314  | 43720436  | processed_pseudogene                   | 18,79 | 0         |
| ENSG00000254422 | ENSG00000254422 | 11 | 102229851 | 102230922 | antisense                              | 18,78 | 0         |
| ENSG00000270055 | ENSG00000270055 | 15 | 30487963  | 30490313  | sense_intronic                         | 18,77 | 0         |
| ENSG00000255035 | SDHCP4          | 11 | 17435672  | 17436181  | processed_pseudogene                   | 18,76 | 0         |
| ENSG00000246203 | ENSG00000246203 | 1  | 155614726 | 155660245 | unprocessed_pseudoge<br>ne             | 18,75 | 6,27E-03  |
| ENSG00000228265 | RALY-AS1        | 20 | 33983052  | 33994357  | lincRNA                                | 18,70 | 0         |
| ENSG00000267102 | ENSG00000267102 | 17 | 35409602  | 35410228  | transcribed_processed_<br>pseudogene   | 18,70 | 0         |
| ENSG00000258926 | ENSG00000258926 | 14 | 61537508  | 61545287  | antisense                              | 18,70 | 0         |
| ENSG00000273448 | ENSG00000273448 | 7  | 67333047  | 67334383  | lincRNA                                | 18,70 | 0         |
| ENSG00000223804 | ENSG00000223804 | 1  | 120267334 | 120341871 | transcribed_unprocess<br>ed_pseudogene | 18,70 | 0         |

|                 |                 |    |           |           |                                    |       |          |
|-----------------|-----------------|----|-----------|-----------|------------------------------------|-------|----------|
| ENSG00000215070 | XRCC6P5         | X  | 99719364  | 99721158  | processed_pseudogene               | 18,70 | 7,06E-02 |
| ENSG00000256238 | SUPT16HP1       | 12 | 16399274  | 16402406  | processed_pseudogene               | 18,69 | 0        |
| ENSG00000206573 | THUMPD3-AS1     | 3  | 9349689   | 9398579   | antisense                          | 18,66 | 0        |
| ENSG00000278811 | LINC00624       | 1  | 147258885 | 147517875 | antisense                          | 18,65 | 0        |
| ENSG00000251143 | ENSG00000251143 | 11 | 72014291  | 72020910  | antisense                          | 18,64 | 0        |
| ENSG00000236739 | CLIC4P1         | 9  | 22747700  | 22748234  | processed_pseudogene               | 18,64 | 0        |
| ENSG00000271676 | ENSG00000271676 | 4  | 77112495  | 77113458  | processed_pseudogene               | 18,63 | 0        |
| ENSG00000263990 | ENSG00000263990 | 17 | 31873926  | 31886666  | lincRNA                            | 18,60 | 0        |
| ENSG00000263126 | ENSG00000263126 | 16 | 67882461  | 67886367  | lincRNA                            | 18,60 | 0        |
| ENSG00000258667 | HIF1A-AS2       | 14 | 61715558  | 61751097  | lincRNA                            | 18,60 | 0        |
| ENSG00000230982 | DSTNP1          | 21 | 46653558  | 46654022  | processed_pseudogene               | 18,50 | 0        |
| ENSG00000259826 | ENSG00000259826 | 7  | 39947522  | 39949755  | antisense                          | 18,50 | 0        |
| ENSG00000267272 | LINC01140       | 1  | 87129765  | 87169198  | lincRNA                            | 18,50 | 0        |
| ENSG00000230409 | TCEA1P2         | 3  | 37275693  | 37276598  | processed_pseudogene               | 18,49 | 0        |
| ENSG00000228507 | DAP3P2          | 2  | 171491422 | 171491931 | processed_pseudogene               | 18,47 | 0        |
| ENSG00000248008 | NRAV            | 12 | 120490328 | 120495940 | antisense                          | 18,41 | 0        |
| ENSG00000224397 | LINC01272       | 20 | 50267486  | 50279795  | lincRNA                            | 18,40 | 0        |
| ENSG00000230555 | ENSG00000230555 | 10 | 43420738  | 43422100  | lincRNA                            | 18,40 | 0        |
| ENSG00000253854 | ENSG00000253854 | 8  | 93719574  | 93721167  | antisense                          | 18,40 | 0        |
| ENSG00000225264 | ZNRF2P2         | 7  | 29598795  | 29685255  | transcribed_processed_pseudogene   | 18,40 | 0        |
| ENSG00000235407 | ENSG00000235407 | 1  | 110487680 | 110490258 | lincRNA                            | 18,40 | 7,06E-02 |
| ENSG00000197358 | BNIP3P1         | 14 | 28264390  | 28265974  | transcribed_processed_pseudogene   | 18,39 | 0        |
| ENSG00000228677 | TTC3-AS1        | 21 | 37187666  | 37193926  | antisense                          | 18,36 | 0        |
| ENSG00000260773 | ENSG00000260773 | 15 | 66314914  | 66331703  | antisense                          | 18,36 | 0        |
| ENSG00000246982 | ENSG00000246982 | 6  | 36146698  | 36197205  | antisense                          | 18,36 | 0        |
| ENSG00000224831 | ENSG00000224831 | 3  | 149982181 | 149983308 | processed_pseudogene               | 18,32 | 0        |
| ENSG00000265413 | ENSG00000265413 | 18 | 8402847   | 8405161   | sense_intronic                     | 18,30 | 0        |
| ENSG00000261485 | PAN3-AS1        | 13 | 28136843  | 28138193  | antisense                          | 18,30 | 0        |
| ENSG00000229106 | BTBD6P1         | 1  | 23901471  | 23902737  | processed_pseudogene               | 18,30 | 0        |
| ENSG00000241886 | ENSG00000241886 | X  | 30698207  | 30721932  | sense_intronic                     | 18,30 | 0        |
| ENSG00000247033 | ENSG00000247033 | 16 | 75108601  | 75110712  | antisense                          | 18,26 | 0        |
| ENSG00000246174 | KCTD21-AS1      | 11 | 78139771  | 78175323  | antisense                          | 18,26 | 0        |
| ENSG00000185839 | ENSG00000185839 | 1  | 58630841  | 58631530  | processed_pseudogene               | 18,23 | 0        |
| ENSG00000213144 | ENSG00000213144 | 12 | 119194850 | 119195394 | processed_pseudogene               | 18,23 | 0        |
| ENSG00000267603 | LINC01028       | 17 | 70051277  | 70068095  | lincRNA                            | 18,20 | 0        |
| ENSG00000259118 | ENSG00000259118 | 14 | 65082034  | 65094212  | antisense                          | 18,17 | 0        |
| ENSG00000223705 | NSUN5P1         | 7  | 75410322  | 75416787  | transcribed_unprocessed_pseudogene | 18,16 | 0        |
| ENSG00000270236 | ENSG00000270236 | 9  | 69107926  | 69108217  | processed_pseudogene               | 18,10 | 0        |
| ENSG00000258666 | ENSG00000258666 | 14 | 100333790 | 100354061 | antisense                          | 18,06 | 0        |
| ENSG00000177197 | PCNPP5          | 13 | 48328084  | 48328564  | processed_pseudogene               | 18,01 | 0        |
| ENSG00000275371 | ENSG00000275371 | 16 | 30110895  | 30111955  | antisense                          | 18,00 | 0        |
| ENSG00000260898 | ADPGK-AS1       | 15 | 72782835  | 72798199  | antisense                          | 18,00 | 0        |
| ENSG00000230408 | ENSG00000230408 | 2  | 200780495 | 200812170 | antisense                          | 17,99 | 0        |
| ENSG00000236256 | DIAPH2-AS1      | X  | 97431286  | 97642589  | antisense                          | 17,93 | 0        |
| ENSG00000186019 | ENSG00000186019 | 19 | 44105463  | 44113145  | antisense                          | 17,91 | 0        |
| ENSG00000267121 | ENSG00000267121 | 17 | 45190931  | 45222222  | antisense                          | 17,90 | 0        |
| ENSG00000273084 | ENSG00000273084 | 7  | 5428731   | 5429672   | lincRNA                            | 17,90 | 0        |
| ENSG00000270890 | ENSG00000270890 | 6  | 143858062 | 143858689 | processed_pseudogene               | 17,90 | 0        |
| ENSG00000232633 | ENSG00000232633 | 5  | 113323028 | 113437174 | antisense                          | 17,90 | 0        |
| ENSG00000227709 | ENSG00000227709 | 3  | 156175852 | 156176911 | processed_pseudogene               | 17,88 | 0        |
| ENSG00000197180 | ENSG00000197180 | X  | 154424380 | 154428479 | lincRNA                            | 17,85 | 0        |
| ENSG00000225053 | PRPF38AP1       | 10 | 8161260   | 8162192   | processed_pseudogene               | 17,83 | 6,27E-03 |
| ENSG00000263823 | ENSG00000263823 | 18 | 31942575  | 31944156  | antisense                          | 17,80 | 0        |
| ENSG00000261220 | ENSG00000261220 | 8  | 133573183 | 133573861 | lincRNA                            | 17,80 | 0        |
| ENSG00000225705 | ENSG00000225705 | 7  | 48846426  | 48852898  | processed_pseudogene               | 17,80 | 0        |
| ENSG00000232665 | PHBP10          | X  | 104647216 | 104647999 | processed_pseudogene               | 17,80 | 0        |
| ENSG00000241478 | HSPA8P9         | 3  | 137880295 | 137882237 | processed_pseudogene               | 17,80 | 0        |
| ENSG00000266708 | ENSG00000266708 | 18 | 8635179   | 8636347   | antisense                          | 17,76 | 0        |

|                 |                 |    |           |           |                                    |       |           |
|-----------------|-----------------|----|-----------|-----------|------------------------------------|-------|-----------|
| ENSG00000253102 | ENSG00000253102 | 17 | 50396438  | 50397888  | antisense                          | 17,74 | 0         |
| ENSG00000230267 | HERC2P4         | 16 | 32103245  | 32188107  | transcribed_unprocessed_pseudogene | 17,72 | 0         |
| ENSG00000159860 | TCAF2P1         | 7  | 143800732 | 143817973 | unprocessed_pseudogene             | 17,67 | 0         |
| ENSG00000227513 | ENSG00000227513 | 2  | 106344566 | 106345433 | processed_pseudogene               | 17,67 | 0,3318209 |
| ENSG00000179899 | PHC1P1          | 12 | 55411727  | 55414787  | processed_pseudogene               | 17,62 | 0         |
| ENSG00000181101 | SDCCAG3P2       | 1  | 175044626 | 175045648 | processed_pseudogene               | 17,61 | 0         |
| ENSG00000227401 | RPL37P1         | 20 | 35588324  | 35588607  | processed_pseudogene               | 17,60 | 0,2161218 |
| ENSG00000240211 | ENSG00000240211 | 7  | 100436204 | 100438504 | antisense                          | 17,60 | 2,21E-02  |
| ENSG00000162997 | PRORS1P         | 2  | 55282319  | 55284522  | unitary_pseudogene                 | 17,60 | 0         |
| ENSG00000269068 | ENSG00000269068 | 2  | 219559083 | 219559626 | antisense                          | 17,60 | 0         |
| ENSG00000273033 | ENSG00000273033 | 3  | 122886941 | 122892416 | lincRNA                            | 17,60 | 0         |
| ENSG00000253106 | ENSG00000253106 | 8  | 124488510 | 124491643 | antisense                          | 17,58 | 0         |
| ENSG00000227495 | ENSG00000227495 | 17 | 5019214   | 5020093   | antisense                          | 17,57 | 0         |
| ENSG00000270177 | ENSG00000270177 | 5  | 134226410 | 134227827 | lincRNA                            | 17,56 | 0         |
| ENSG00000226098 | SEC11B          | 8  | 54522799  | 54523297  | processed_pseudogene               | 17,54 | 0         |
| ENSG00000242756 | RHOT1P3         | 13 | 18837768  | 18838098  | processed_pseudogene               | 17,52 | 0         |
| ENSG00000263235 | ENSG00000263235 | 16 | 3650636   | 3651703   | sense_overlapping                  | 17,50 | 0         |
| ENSG00000270304 | ENSG00000270304 | 15 | 37253879  | 37254952  | processed_pseudogene               | 17,50 | 0         |
| ENSG00000238271 | IFNWP19         | 9  | 21455484  | 21456049  | unprocessed_pseudogene             | 17,50 | 0         |
| ENSG00000267598 | ENSG00000267598 | 19 | 13153071  | 13154193  | antisense                          | 17,48 | 0         |
| ENSG00000265205 | ENSG00000265205 | 17 | 28670054  | 28672804  | antisense                          | 17,40 | 0         |
| ENSG00000240399 | ENSG00000240399 | 12 | 48054813  | 48055591  | transcribed_processed_pseudogene   | 17,40 | 1,40E-02  |
| ENSG00000231351 | ENSG00000231351 | 2  | 86930250  | 86930754  | processed_pseudogene               | 17,40 | 0         |
| ENSG00000273306 | ENSG00000273306 | 2  | 99405218  | 99405843  | antisense                          | 17,40 | 0         |
| ENSG00000223353 | ENSG00000223353 | 1  | 245123471 | 245124450 | processed_pseudogene               | 17,40 | 0         |
| ENSG00000224217 | ENSG00000224217 | X  | 116748530 | 116748877 | processed_pseudogene               | 17,40 | 0         |
| ENSG00000281450 | PANDAR          | 6  | 36673621  | 36675126  | lincRNA                            | 17,37 | 0         |
| ENSG00000229419 | RALGAPA1P       | 9  | 105520128 | 105526359 | processed_pseudogene               | 17,32 | 0         |
| ENSG00000250483 | PPM1AP1         | 8  | 15806149  | 15807283  | processed_pseudogene               | 17,30 | 0         |
| ENSG00000243155 | ENSG00000243155 | 1  | 180944042 | 180976482 | antisense                          | 17,30 | 0         |
| ENSG00000261063 | ENSG00000261063 | 16 | 77201474  | 77249957  | antisense                          | 17,30 | 0         |
| ENSG00000227939 | RPL3P2          | 6  | 31280317  | 31281519  | processed_pseudogene               | 17,28 | 0         |
| ENSG00000267565 | ENSG00000267565 | 19 | 19892433  | 19895847  | antisense                          | 17,27 | 0         |
| ENSG00000254129 | ENSG00000254129 | 8  | 29110573  | 29140729  | antisense                          | 17,27 | 0         |
| ENSG00000249348 | UGDH-AS1        | 4  | 39528019  | 39594707  | antisense                          | 17,27 | 0         |
| ENSG00000249087 | ZNF436-AS1      | 1  | 23368997  | 23371839  | antisense                          | 17,22 | 0         |
| ENSG00000267787 | ENSG00000267787 | 18 | 57639455  | 57738044  | antisense                          | 17,20 | 0         |
| ENSG00000273018 | ENSG00000273018 | 17 | 18511221  | 18551705  | processed_transcript               | 17,20 | 0         |
| ENSG00000257346 | ENSG00000257346 | 12 | 49090208  | 49093312  | antisense                          | 17,20 | 0         |
| ENSG00000257410 | ENSG00000257410 | 12 | 71793855  | 71799627  | lincRNA                            | 17,20 | 1,40E-02  |
| ENSG00000228863 | ENSG00000228863 | 1  | 160670778 | 160699761 | antisense                          | 17,20 | 0         |
| ENSG00000196295 | ENSG00000196295 | 7  | 30516309  | 30594809  | processed_transcript               | 17,20 | 0         |
| ENSG00000261552 | ENSG00000261552 | 16 | 28989140  | 28990778  | antisense                          | 17,18 | 0,1392851 |
| ENSG00000247373 | ENSG00000247373 | 12 | 123575891 | 123585115 | lincRNA                            | 17,18 | 0         |
| ENSG00000244380 | ENSG00000244380 | 3  | 48440352  | 48446656  | antisense                          | 17,17 | 0         |
| ENSG00000267336 | EIF4A2P1        | 18 | 12912844  | 12913906  | processed_pseudogene               | 17,15 | 4,86E-02  |
| ENSG00000231563 | ENSG00000231563 | 1  | 228407381 | 228409694 | antisense                          | 17,14 | 0         |
| ENSG00000251432 | ENSG00000251432 | 4  | 128292751 | 128519394 | lincRNA                            | 17,14 | 0         |
| ENSG00000225031 | EIF4BP7         | X  | 111619677 | 111621489 | processed_pseudogene               | 17,14 | 0         |
| ENSG00000234337 | ENSG00000234337 | 16 | 52655307  | 52656045  | processed_pseudogene               | 17,12 | 0         |
| ENSG00000264578 | ENSG00000264578 | 8  | 41609692  | 41621502  | antisense                          | 17,11 | 0         |
| ENSG00000274092 | ENSG00000274092 | 16 | 27313387  | 27314101  | antisense                          | 17,10 | 0         |
| ENSG00000271072 | PHBP20          | 15 | 72450657  | 72451474  | processed_pseudogene               | 17,10 | 0,2161218 |
| ENSG00000215483 | LINC00598       | 13 | 40450934  | 40535807  | lincRNA                            | 17,10 | 0         |
| ENSG00000255197 | ENSG00000255197 | 11 | 47383148  | 47409190  | antisense                          | 17,10 | 0         |
| ENSG00000242861 | ENSG00000242861 | 1  | 225840883 | 225846522 | antisense                          | 17,09 | 0         |
| ENSG00000234648 | ENSG00000234648 | 14 | 98973314  | 98973471  | processed_pseudogene               | 17,03 | 0         |

|                 |                 |    |           |           |                                        |       |           |
|-----------------|-----------------|----|-----------|-----------|----------------------------------------|-------|-----------|
| ENSG00000223723 | ENSG00000223723 | X  | 36962196  | 36963425  | processed_pseudogene                   | 17,02 | 0         |
| ENSG00000267232 | ENSG00000267232 | 19 | 1875016   | 1875992   | lincRNA                                | 17,00 | 0         |
| ENSG00000230113 | ENSG00000230113 | 17 | 30956280  | 30956961  | antisense                              | 17,00 | 0         |
| ENSG00000257283 | ENSG00000257283 | 12 | 93894965  | 93943603  | antisense                              | 17,00 | 0         |
| ENSG00000234825 | XRCC6P2         | X  | 150231075 | 150232896 | processed_pseudogene                   | 16,99 | 0         |
| ENSG00000214765 | SEPT7P2         | 7  | 45723780  | 45768985  | transcribed_unprocess<br>ed_pseudogene | 16,99 | 0         |
| ENSG00000188693 | CYP51A1-AS1     | 7  | 92134604  | 92180725  | antisense                              | 16,94 | 0         |
| ENSG00000203469 | ENSG00000203469 | 1  | 10458555  | 10459338  | antisense                              | 16,94 | 0         |
| ENSG00000237350 | CDC42P6         | 4  | 22727375  | 22727950  | processed_pseudogene                   | 16,94 | 0         |
| ENSG00000256616 | ENSG00000256616 | 18 | 12073232  | 12076654  | transcribed_processed_<br>pseudogene   | 16,91 | 0         |
| ENSG00000226314 | ZNF192P1        | 6  | 28161781  | 28169594  | transcribed_unprocess<br>ed_pseudogene | 16,91 | 0         |
| ENSG00000269843 | ENSG00000269843 | 19 | 40831221  | 40837210  | lincRNA                                | 16,90 | 0         |
| ENSG00000231084 | ENSG00000231084 | 1  | 185171335 | 185171710 | processed_pseudogene                   | 16,82 | 0         |
| ENSG00000267632 | ENSG00000267632 | 17 | 42509784  | 42511519  | sense_intronic                         | 16,80 | 0         |
| ENSG00000272170 | ENSG00000272170 | 6  | 43074331  | 43074739  | antisense                              | 16,80 | 0         |
| ENSG00000225769 | CROCCP1         | X  | 135432960 | 135438634 | processed_pseudogene                   | 16,80 | 1,40E-02  |
| ENSG00000234213 | FHP1            | 13 | 42255873  | 42256575  | processed_pseudogene                   | 16,74 | 0         |
| ENSG00000188599 | NPIPP1          | 16 | 15104312  | 15123498  | transcribed_unprocess<br>ed_pseudogene | 16,74 | 0         |
| ENSG00000232855 | ENSG00000232855 | 21 | 28439346  | 28674848  | lincRNA                                | 16,70 | 0         |
| ENSG00000268970 | ENSG00000268970 | 19 | 52597699  | 52598887  | sense_intronic                         | 16,70 | 0         |
| ENSG00000221949 | LINC01465       | 12 | 62601751  | 62603690  | lincRNA                                | 16,70 | 0         |
| ENSG00000256377 | ENSG00000256377 | 12 | 27696388  | 27710770  | antisense                              | 16,70 | 0         |
| ENSG00000227344 | HAUS6P1         | 7  | 53187388  | 53188938  | processed_pseudogene                   | 16,64 | 0         |
| ENSG00000261093 | ENSG00000261093 | 16 | 2597881   | 2599718   | antisense                              | 16,63 | 0         |
| ENSG00000225486 | ENSG00000225486 | 1  | 233836080 | 233836432 | processed_pseudogene                   | 16,63 | 0         |
| ENSG00000228089 | PNKDP1          | X  | 131803312 | 131803741 | processed_pseudogene                   | 16,62 | 0         |
| ENSG00000278869 | ENSG00000278869 | 22 | 49933198  | 49934074  | lincRNA                                | 16,60 | 0         |
| ENSG00000268049 | ENSG00000268049 | 19 | 58357999  | 58359603  | antisense                              | 16,60 | 0         |
| ENSG00000224825 | RORB-AS1        | 9  | 74485551  | 74499127  | antisense                              | 16,60 | 0         |
| ENSG00000236018 | ENSG00000236018 | 7  | 157197600 | 157198511 | processed_pseudogene                   | 16,60 | 0         |
| ENSG00000279467 | ENSG00000279467 | 22 | 23865248  | 23873277  | antisense                              | 16,58 | 0         |
| ENSG00000219201 | ENSG00000219201 | 1  | 77810861  | 77811781  | processed_pseudogene                   | 16,57 | 0         |
| ENSG00000254294 | IMPDH1P6        | 8  | 123400582 | 123402095 | processed_pseudogene                   | 16,56 | 0         |
| ENSG00000233175 | ENSG00000233175 | 17 | 45238028  | 45241734  | antisense                              | 16,53 | 0         |
| ENSG00000232973 | CYP1B1-AS1      | 2  | 38073447  | 38231651  | antisense                              | 16,51 | 0         |
| ENSG00000224950 | ENSG00000224950 | 1  | 116493016 | 116499212 | lincRNA                                | 16,50 | 0         |
| ENSG00000263781 | ENSG00000263781 | 17 | 29021325  | 29021640  | processed_pseudogene                   | 16,48 | 0         |
| ENSG00000272906 | ENSG00000272906 | 1  | 179881607 | 179882595 | lincRNA                                | 16,46 | 0         |
| ENSG00000268230 | ENSG00000268230 | 19 | 58346854  | 58362751  | processed_transcript                   | 16,42 | 0         |
| ENSG00000249868 | ENSG00000249868 | 8  | 311133    | 331026    | lincRNA                                | 16,42 | 0,1836819 |
| ENSG00000234703 | ENSG00000234703 | 21 | 35136638  | 35139222  | lincRNA                                | 16,40 | 0         |
| ENSG00000263271 | ENSG00000263271 | 17 | 81461013  | 81461937  | antisense                              | 16,40 | 0         |
| ENSG00000245105 | A2M-AS1         | 12 | 9065177   | 9068060   | antisense                              | 16,40 | 0         |
| ENSG00000250770 | ENSG00000250770 | 12 | 3296202   | 3300224   | lincRNA                                | 16,40 | 1,40E-02  |
| ENSG00000256030 | CBX3P4          | 12 | 2786931   | 2794295   | transcribed_processed_<br>pseudogene   | 16,40 | 7,06E-02  |
| ENSG00000276115 | ENSG00000276115 | 12 | 32352349  | 32354144  | sense_intronic                         | 16,40 | 0         |
| ENSG00000270067 | ENSG00000270067 | 5  | 112893333 | 112894001 | antisense                              | 16,40 | 0         |
| ENSG00000249685 | ENSG00000249685 | 4  | 39133913  | 39135608  | lincRNA                                | 16,40 | 0         |
| ENSG00000250318 | ENSG00000250318 | 22 | 30653877  | 30654814  | unprocessed_pseudoge<br>ne             | 16,38 | 0         |
| ENSG00000228366 | ENSG00000228366 | 9  | 105710290 | 105710781 | processed_pseudogene                   | 16,35 | 0         |
| ENSG00000254907 | ENSG00000254907 | 11 | 43328748  | 43359296  | antisense                              | 16,31 | 0         |
| ENSG00000259943 | ENSG00000259943 | 1  | 40256427  | 40257967  | antisense                              | 16,31 | 0         |
| ENSG00000254909 | ENSG00000254909 | 11 | 119005727 | 119005934 | processed_pseudogene                   | 16,30 | 0         |
| ENSG00000273521 | ENSG00000273521 | 10 | 131980240 | 131981337 | antisense                              | 16,30 | 0         |
| ENSG00000228653 | HNRNPCP7        | 7  | 64500825  | 64501729  | processed_pseudogene                   | 16,30 | 0         |

|                 |                 |    |           |           |                                    |       |           |
|-----------------|-----------------|----|-----------|-----------|------------------------------------|-------|-----------|
| ENSG00000272221 | ENSG00000272221 | 6  | 31394289  | 31395495  | lincRNA                            | 16,30 | 0         |
| ENSG00000260118 | ENSG00000260118 | X  | 68013470  | 68014901  | lincRNA                            | 16,30 | 0         |
| ENSG00000183171 | ENSG00000183171 | X  | 150114378 | 150116520 | processed_pseudogene               | 16,29 | 0         |
| ENSG00000256385 | UBE2NP1         | 14 | 21611924  | 21612381  | processed_pseudogene               | 16,27 | 0         |
| ENSG00000224066 | ENSG00000224066 | 1  | 32204769  | 32206814  | antisense                          | 16,27 | 0         |
| ENSG00000267984 | ENSG00000267984 | 19 | 51345169  | 51353293  | antisense                          | 16,27 | 0         |
| ENSG00000255883 | ENSG00000255883 | 5  | 73508685  | 73509254  | processed_pseudogene               | 16,26 | 0         |
| ENSG00000224003 | YES1P1          | 22 | 25647261  | 25649232  | processed_pseudogene               | 16,26 | 0         |
| ENSG00000241007 | SEPT7P6         | 7  | 152367519 | 152368661 | processed_pseudogene               | 16,22 | 0         |
| ENSG00000225498 | ENSG00000225498 | 7  | 90312496  | 90322592  | lincRNA                            | 16,20 | 0         |
| ENSG00000242960 | FTH1P23         | 3  | 72929044  | 72929593  | processed_pseudogene               | 16,20 | 0         |
| ENSG00000243742 | RPLPOP2         | 11 | 61615036  | 61639449  | transcribed_processed_pseudogene   | 16,19 | 2,95E-02  |
| ENSG00000248254 | ENSG00000248254 | 4  | 47556731  | 47560259  | antisense                          | 16,18 | 0         |
| ENSG00000260121 | ENSG00000260121 | 16 | 88718615  | 88720459  | antisense                          | 16,17 | 0         |
| ENSG00000234636 | MED14OS         | X  | 40735400  | 40738701  | antisense                          | 16,17 | 0         |
| ENSG00000260920 | ENSG00000260920 | 1  | 40464319  | 40466767  | sense_overlapping                  | 16,12 | 0         |
| ENSG00000224505 | ENSG00000224505 | 17 | 45150400  | 45161510  | antisense                          | 16,12 | 0         |
| ENSG00000268081 | ENSG00000268081 | 19 | 21554640  | 21569237  | antisense                          | 16,10 | 0         |
| ENSG00000228510 | ENSG00000228510 | 9  | 128444587 | 128446628 | processed_pseudogene               | 16,10 | 0         |
| ENSG00000243406 | MRPS31P5        | 13 | 52167709  | 52194465  | transcribed_unprocessed_pseudogene | 16,09 | 0         |
| ENSG00000247498 | ENSG00000247498 | 12 | 12927726  | 12984645  | antisense                          | 16,09 | 0         |
| ENSG00000240254 | B4GALT4-AS1     | 3  | 119226486 | 119290666 | antisense                          | 16,02 | 0         |
| ENSG00000232559 | ENSG00000232559 | 7  | 66554588  | 66576923  | unprocessed_pseudogene             | 16,01 | 0         |
| ENSG00000244558 | KCNK15-AS1      | 20 | 44694892  | 44746021  | antisense                          | 16,00 | 0         |
| ENSG00000264278 | ENSG00000264278 | 18 | 76794732  | 76822295  | lincRNA                            | 16,00 | 0         |
| ENSG00000249176 | ENSG00000249176 | 17 | 49939122  | 49939819  | processed_pseudogene               | 16,00 | 0         |
| ENSG00000259969 | ENSG00000259969 | 14 | 57993545  | 57994525  | sense_overlapping                  | 16,00 | 0         |
| ENSG00000234814 | SVILP1          | 10 | 30671566  | 30717266  | transcribed_unprocessed_pseudogene | 16,00 | 0         |
| ENSG00000127957 | PMS2P3          | 7  | 75502930  | 75528148  | transcribed_unprocessed_pseudogene | 16,00 | 0         |
| ENSG00000215190 | LINC00680       | 6  | 57946074  | 57961501  | lincRNA                            | 16,00 | 0         |
| ENSG00000225216 | ENSG00000225216 | 2  | 205756469 | 205764006 | antisense                          | 16,00 | 0         |
| ENSG00000233223 | ENSG00000233223 | 17 | 7581964   | 7584072   | antisense                          | 15,97 | 0         |
| ENSG00000240914 | RPL15P2         | 14 | 94800849  | 94801463  | processed_pseudogene               | 15,94 | 0,1836819 |
| ENSG00000225210 | DUXAP9          | 14 | 19062316  | 19115270  | transcribed_processed_pseudogene   | 15,93 | 0         |
| ENSG00000273148 | ENSG00000273148 | 20 | 18794529  | 18796067  | lincRNA                            | 15,90 | 0         |
| ENSG00000215572 | ESRRAP1         | 13 | 19560013  | 19561269  | processed_pseudogene               | 15,90 | 0         |
| ENSG00000223542 | ENSG00000223542 | 6  | 133435077 | 133439464 | antisense                          | 15,90 | 7,06E-02  |
| ENSG00000271551 | ENSG00000271551 | 6  | 156776360 | 156778422 | antisense                          | 15,90 | 0         |
| ENSG00000281398 | SNHG4           | 5  | 139274102 | 139283244 | processed_transcript               | 15,90 | 0         |
| ENSG00000237973 | MTCO1P12        | 1  | 631074    | 632616    | unprocessed_pseudogene             | 15,88 | 0         |
| ENSG00000244879 | GABPB1-AS1      | 15 | 50354959  | 50372202  | antisense                          | 15,87 | 0         |
| ENSG00000245685 | ENSG00000245685 | 4  | 189780336 | 189940271 | lincRNA                            | 15,85 | 2,21E-02  |
| ENSG00000248690 | HAS2-AS1        | 8  | 121639293 | 121644693 | antisense                          | 15,84 | 0         |
| ENSG00000237080 | EHMT2-AS1       | 6  | 31883761  | 31884204  | antisense                          | 15,81 | 0         |
| ENSG00000224806 | ARL5AP4         | 22 | 24686168  | 24686679  | processed_pseudogene               | 15,80 | 0,2161218 |
| ENSG00000275645 | ENSG00000275645 | 15 | 75346744  | 75347161  | antisense                          | 15,80 | 0         |
| ENSG00000262619 | LINC00621       | 13 | 22894656  | 22916369  | lincRNA                            | 15,80 | 0         |
| ENSG00000272986 | ENSG00000272986 | 4  | 70703747  | 70704491  | antisense                          | 15,80 | 1,40E-02  |
| ENSG00000254454 | RCC2P6          | 11 | 62371146  | 62373168  | processed_pseudogene               | 15,77 | 0         |
| ENSG00000183604 | SMG1P5          | 16 | 30267553  | 30335374  | transcribed_unprocessed_pseudogene | 15,77 | 0         |
| ENSG00000259113 | ENSG00000259113 | 14 | 50448807  | 50456742  | lincRNA                            | 15,75 | 0         |
| ENSG00000261207 | ENSG00000261207 | 16 | 1751559   | 1752262   | antisense                          | 15,73 | 0         |
| ENSG00000273032 | DGCR9           | 22 | 19017834  | 19020248  | lincRNA                            | 15,70 | 1,40E-02  |

|                 |                 |    |           |           |                                    |       |           |
|-----------------|-----------------|----|-----------|-----------|------------------------------------|-------|-----------|
| ENSG00000214401 | KANSL1-AS1      | 17 | 46193576  | 46196723  | antisense                          | 15,70 | 0         |
| ENSG00000266648 | SETP3           | 17 | 58476138  | 58476950  | processed_pseudogene               | 15,70 | 0         |
| ENSG00000180422 | LINC00304       | 16 | 89159146  | 89164245  | lincRNA                            | 15,70 | 1,40E-02  |
| ENSG00000272463 | ENSG00000272463 | 6  | 708592    | 711405    | lincRNA                            | 15,70 | 0         |
| ENSG00000224459 | ENSG00000224459 | 1  | 15740051  | 15749896  | antisense                          | 15,70 | 0         |
| ENSG00000237976 | ENSG00000237976 | 1  | 151346967 | 151348027 | antisense                          | 15,70 | 0         |
| ENSG00000203865 | ATP1A1-AS1      | 1  | 116392247 | 116418622 | processed_transcript               | 15,69 | 0         |
| ENSG00000226367 | ST7-AS2         | 7  | 117072072 | 117146480 | antisense                          | 15,69 | 0         |
| ENSG00000254481 | PTP4A2P2        | 11 | 134123828 | 134124329 | processed_pseudogene               | 15,67 | 1,95E-02  |
| ENSG00000224424 | PRKAR2A-AS1     | 3  | 48847572  | 48851981  | antisense                          | 15,65 | 0         |
| ENSG00000269904 | MAP2K4P1        | X  | 73524275  | 73563085  | transcribed_unprocessed_pseudogene | 15,63 | 0         |
| ENSG00000276259 | ENSG00000276259 | 16 | 58522970  | 58523842  | antisense                          | 15,62 | 0         |
| ENSG00000270093 | ENSG00000270093 | 21 | 16643529  | 16645065  | lincRNA                            | 15,60 | 0         |
| ENSG00000268521 | VN1R83P         | 19 | 21289554  | 21289998  | unprocessed_pseudogene             | 15,60 | 0         |
| ENSG00000269486 | ENSG00000269486 | 19 | 38935297  | 38938632  | lincRNA                            | 15,60 | 0         |
| ENSG00000260751 | ENSG00000260751 | 16 | 23568673  | 23569696  | sense_intronic                     | 15,60 | 0         |
| ENSG00000259539 | ENSG00000259539 | 15 | 45152664  | 45167526  | 3prime_overlapping_ncrna           | 15,60 | 0         |
| ENSG00000215199 | YWHAZP6         | 9  | 34922184  | 34922921  | processed_pseudogene               | 15,60 | 0,2161218 |
| ENSG00000273145 | ENSG00000273145 | 22 | 46013606  | 46015498  | lincRNA                            | 15,58 | 0         |
| ENSG00000260777 | ENSG00000260777 | 17 | 28263634  | 28266369  | lincRNA                            | 15,58 | 0         |
| ENSG00000272008 | ENSG00000272008 | 6  | 87151159  | 87155285  | antisense                          | 15,55 | 0         |
| ENSG00000253356 | ENSG00000253356 | 8  | 38148741  | 38163772  | antisense                          | 15,51 | 0         |
| ENSG00000268087 | ENSG00000268087 | 19 | 16610411  | 16636531  | lincRNA                            | 15,50 | 0         |
| ENSG00000230177 | ENSG00000230177 | 6  | 111277932 | 111278742 | antisense                          | 15,50 | 0         |
| ENSG00000231802 | ENSG00000231802 | 2  | 219684030 | 219684795 | processed_pseudogene               | 15,50 | 1,40E-02  |
| ENSG00000226648 | PLCG1-AS1       | 20 | 41098329  | 41138003  | antisense                          | 15,49 | 0         |
| ENSG00000227850 | SEPT2P1         | 1  | 105698039 | 105698218 | processed_pseudogene               | 15,49 | 0         |
| ENSG00000235370 | DNM1P51         | 15 | 84398316  | 84411701  | transcribed_unprocessed_pseudogene | 15,46 | 0         |
| ENSG00000178977 | LINC00324       | 17 | 8220642   | 8224043   | lincRNA                            | 15,45 | 0         |
| ENSG00000241570 | PAQR9-AS1       | 3  | 142960650 | 143001559 | antisense                          | 15,45 | 0         |
| ENSG00000254065 | ENSG00000254065 | 8  | 47592147  | 47592609  | processed_pseudogene               | 15,43 | 0         |
| ENSG00000216775 | ENSG00000216775 | 6  | 52665148  | 52669155  | transcribed_unprocessed_pseudogene | 15,41 | 0         |
| ENSG00000223704 | LINC01422       | 22 | 26858634  | 26865786  | lincRNA                            | 15,40 | 0         |
| ENSG00000230613 | HM13-AS1        | 20 | 31567707  | 31573263  | antisense                          | 15,40 | 0         |
| ENSG00000231113 | ENSG00000231113 | 6  | 42940364  | 42948360  | antisense                          | 15,40 | 0         |
| ENSG00000260760 | PWRN3           | 15 | 24441127  | 24447967  | lincRNA                            | 15,36 | 0         |
| ENSG00000277013 | ENSG00000277013 | 19 | 33906352  | 33908391  | lincRNA                            | 15,30 | 0         |
| ENSG00000260545 | ENSG00000260545 | 16 | 58116885  | 58119353  | antisense                          | 15,30 | 0         |
| ENSG00000198580 | ENSG00000198580 | 7  | 6673494   | 6676366   | unprocessed_pseudogene             | 15,30 | 0         |
| ENSG00000272320 | ENSG00000272320 | 6  | 3311662   | 3313650   | antisense                          | 15,30 | 0         |
| ENSG00000254298 | ENSG00000254298 | 5  | 151158106 | 151158462 | lincRNA                            | 15,30 | 0         |
| ENSG00000239828 | ENSG00000239828 | 3  | 107272611 | 107421304 | lincRNA                            | 15,30 | 0         |
| ENSG00000258317 | ENSG00000258317 | 12 | 56120033  | 56129619  | antisense                          | 15,29 | 0         |
| ENSG00000179031 | ENSG00000179031 | X  | 100910712 | 100911489 | processed_pseudogene               | 15,29 | 9,18E-02  |
| ENSG00000213252 | ENSG00000213252 | 11 | 106826392 | 106827890 | processed_pseudogene               | 15,25 | 0         |
| ENSG00000227036 | LINC00511       | 17 | 72323123  | 72640472  | lincRNA                            | 15,25 | 6,27E-03  |
| ENSG00000224635 | ENSG00000224635 | 20 | 38406011  | 38416797  | lincRNA                            | 15,20 | 1,40E-02  |
| ENSG00000270871 | ENSG00000270871 | 17 | 35816717  | 35830293  | antisense                          | 15,20 | 0         |
| ENSG00000257647 | ENSG00000257647 | 15 | 25027736  | 25032047  | lincRNA                            | 15,20 | 0         |
| ENSG00000272518 | ENSG00000272518 | 8  | 79956465  | 79957381  | sense_intronic                     | 15,20 | 0         |
| ENSG00000178162 | FAR2P2          | 2  | 130416755 | 130431363 | transcribed_unprocessed_pseudogene | 15,20 | 0         |
| ENSG00000227081 | ENSG00000227081 | 12 | 3211663   | 3211917   | processed_pseudogene               | 15,16 | 0         |
| ENSG00000232801 | SDCBPP3         | X  | 40890647  | 40891537  | processed_pseudogene               | 15,14 | 0         |
| ENSG00000260233 | SSSCA1-AS1      | 11 | 65568482  | 65570423  | processed_transcript               | 15,14 | 0         |

|                 |                 |    |           |           |                                    |       |          |
|-----------------|-----------------|----|-----------|-----------|------------------------------------|-------|----------|
| ENSG00000175061 | LRRC75A-AS1     | 17 | 16438822  | 16478678  | processed_transcript               | 15,13 | 0        |
| ENSG00000236105 | PRELID3BP10     | 7  | 127295620 | 127296203 | processed_pseudogene               | 15,12 | 0        |
| ENSG00000183242 | WT1-AS          | 11 | 32435518  | 32458769  | antisense                          | 15,10 | 0        |
| ENSG00000273402 | ENSG00000273402 | 8  | 237045    | 237669    | antisense                          | 15,10 | 0        |
| ENSG00000272040 | ENSG00000272040 | 5  | 75608817  | 75609983  | lincRNA                            | 15,10 | 0        |
| ENSG00000269243 | ENSG00000269243 | 19 | 16123661  | 16139892  | antisense                          | 15,06 | 0        |
| ENSG00000256849 | ENSG00000256849 | 12 | 19941521  | 19943018  | processed_pseudogene               | 15,05 | 0        |
| ENSG00000234665 | ENSG00000234665 | 9  | 62856999  | 62898087  | lincRNA                            | 15,04 | 0        |
| ENSG00000280758 | ENSG00000280758 | 9  | 128630328 | 128631685 | antisense                          | 15,04 | 0        |
| ENSG00000203644 | ENSG00000203644 | 3  | 129847048 | 129847957 | sense_intronic                     | 15,02 | 0        |
| ENSG00000260160 | ENSG00000260160 | 19 | 52058490  | 52063703  | sense_overlapping                  | 15,00 | 0        |
| ENSG00000263724 | DLGAP1-AS3      | 18 | 3878180   | 3897069   | antisense                          | 15,00 | 2,95E-02 |
| ENSG00000274487 | ENSG00000274487 | 17 | 38195740  | 38257152  | unprocessed_pseudogene             | 15,00 | 0        |
| ENSG00000254872 | ENSG00000254872 | 11 | 1049880   | 1055749   | lincRNA                            | 15,00 | 7,06E-02 |
| ENSG00000272277 | ENSG00000272277 | 6  | 3068045   | 3068894   | antisense                          | 15,00 | 0        |
| ENSG00000253955 | ENSG00000253955 | 5  | 173579643 | 173585068 | antisense                          | 15,00 | 0        |
| ENSG00000261488 | ENSG00000261488 | 3  | 112133423 | 112135359 | antisense                          | 15,00 | 0        |
| ENSG00000256210 | ENSG00000256210 | 19 | 14792318  | 14792533  | processed_pseudogene               | 14,99 | 0        |
| ENSG00000237938 | ENSG00000237938 | 1  | 15720312  | 15736896  | antisense                          | 14,96 | 0        |
| ENSG00000246695 | RASSF8-AS1      | 12 | 25939329  | 25959765  | antisense                          | 14,96 | 0        |
| ENSG00000272017 | ENSG00000272017 | 6  | 99568097  | 99569096  | antisense                          | 14,94 | 0        |
| ENSG00000235400 | ENSG00000235400 | 1  | 78749073  | 78750659  | processed_pseudogene               | 14,91 | 7,06E-02 |
| ENSG00000213790 | OLA1P1          | 22 | 42107765  | 42108953  | processed_pseudogene               | 14,90 | 0        |
| ENSG00000269892 | ENSG00000269892 | 12 | 6742985   | 6743641   | lincRNA                            | 14,90 | 0        |
| ENSG00000270175 | ENSG00000270175 | 12 | 53500162  | 53500936  | antisense                          | 14,90 | 0        |
| ENSG00000233038 | ENSG00000233038 | 7  | 157854529 | 157866092 | antisense                          | 14,90 | 0        |
| ENSG00000273361 | ENSG00000273361 | 2  | 218398743 | 218399219 | antisense                          | 14,90 | 0        |
| ENSG00000229820 | ENSG00000229820 | 1  | 28453541  | 28453934  | processed_pseudogene               | 14,90 | 7,06E-02 |
| ENSG00000236263 | ENSG00000236263 | 1  | 155211151 | 155213819 | antisense                          | 14,90 | 0        |
| ENSG00000246273 | SBF2-AS1        | 11 | 9758292   | 9811319   | antisense                          | 14,88 | 0        |
| ENSG00000255517 | ENSG00000255517 | 11 | 66473490  | 66480233  | antisense                          | 14,88 | 0        |
| ENSG00000238116 | ENSG00000238116 | X  | 100801188 | 100803060 | processed_pseudogene               | 14,82 | 0        |
| ENSG00000264311 | CCDC58P1        | 18 | 10623876  | 10624305  | processed_pseudogene               | 14,82 | 0        |
| ENSG00000276975 | HYDIN2          | 1  | 146547367 | 146914294 | transcribed_unprocessed_pseudogene | 14,82 | 0        |
| ENSG00000261342 | ENSG00000261342 | 19 | 2727743   | 2729327   | sense_intronic                     | 14,80 | 0        |
| ENSG00000229368 | ENSG00000229368 | 11 | 3854612   | 3855399   | sense_overlapping                  | 14,80 | 0        |
| ENSG00000227006 | ENSG00000227006 | 1  | 230258694 | 230268483 | antisense                          | 14,80 | 0        |
| ENSG00000232442 | ENSG00000232442 | 20 | 63627227  | 63628824  | antisense                          | 14,79 | 1,95E-02 |
| ENSG00000275202 | ENSG00000275202 | 13 | 48974967  | 48976867  | antisense                          | 14,76 | 0        |
| ENSG00000254471 | ENSG00000254471 | 11 | 79987513  | 79989630  | processed_pseudogene               | 14,73 | 0        |
| ENSG00000267062 | ENSG00000267062 | 19 | 12796823  | 12801849  | antisense                          | 14,72 | 0        |
| ENSG00000279182 | ENSG00000279182 | 22 | 50316035  | 50317025  | antisense                          | 14,71 | 0        |
| ENSG00000230077 | MTAPP2          | 3  | 189969030 | 189969861 | processed_pseudogene               | 14,71 | 0        |
| ENSG00000242159 | ABCF2P1         | 3  | 88317156  | 88319022  | processed_pseudogene               | 14,70 | 0        |
| ENSG00000268810 | ENSG00000268810 | 19 | 46382492  | 46383169  | antisense                          | 14,70 | 0        |
| ENSG00000260240 | APOOP5          | 16 | 59709993  | 59755026  | transcribed_processed_pseudogene   | 14,70 | 0        |
| ENSG00000259319 | ENSG00000259319 | 14 | 75423683  | 75427741  | antisense                          | 14,70 | 0        |
| ENSG00000273108 | ENSG00000273108 | 10 | 103608619 | 103610050 | antisense                          | 14,70 | 7,06E-02 |
| ENSG00000281186 | LINC00706       | 10 | 6774307   | 6779180   | lincRNA                            | 14,70 | 7,06E-02 |
| ENSG00000239831 | RNF7P1          | 3  | 57519669  | 57520010  | processed_pseudogene               | 14,69 | 0        |
| ENSG00000215424 | MCM3AP-AS1      | 21 | 46229217  | 46259390  | antisense                          | 14,65 | 0        |
| ENSG00000248980 | ENSG00000248980 | 4  | 176308268 | 176320458 | antisense                          | 14,64 | 0        |
| ENSG00000218027 | ENSG00000218027 | 6  | 1513698   | 1515289   | processed_pseudogene               | 14,64 | 0        |
| ENSG00000226526 | ENSG00000226526 | 1  | 16978926  | 17005091  | antisense                          | 14,61 | 0        |
| ENSG00000260036 | ENSG00000260036 | 15 | 55442635  | 55443357  | processed_pseudogene               | 14,60 | 0        |
| ENSG00000237234 | ENSG00000237234 | 6  | 112154765 | 112166476 | antisense                          | 14,60 | 0        |
| ENSG00000215795 | ENSG00000215795 | 1  | 247183813 | 247185482 | processed_pseudogene               | 14,60 | 1,40E-02 |
| ENSG00000213025 | COX20P1         | 10 | 68632371  | 68632727  | processed_pseudogene               | 14,59 | 0        |

|                 |                 |    |           |           |                                    |       |           |
|-----------------|-----------------|----|-----------|-----------|------------------------------------|-------|-----------|
| ENSG00000278341 | ENSG00000278341 | 16 | 88708956  | 88710437  | antisense                          | 14,59 | 0         |
| ENSG00000272374 | ENSG00000272374 | 6  | 35220370  | 35224630  | lincRNA                            | 14,58 | 3,30E-03  |
| ENSG00000265574 | WDR45BP1        | 17 | 32111562  | 32112590  | processed_pseudogene               | 14,58 | 0         |
| ENSG00000223642 | ENSG00000223642 | 2  | 159386367 | 159404636 | antisense                          | 14,55 | 0         |
| ENSG00000236326 | ENSG00000236326 | 6  | 116244187 | 116244728 | antisense                          | 14,54 | 0         |
| ENSG00000260260 | SNHG19          | 16 | 2154797   | 2155358   | lincRNA                            | 14,54 | 3,30E-03  |
| ENSG00000273117 | ENSG00000273117 | 7  | 155295918 | 155297541 | lincRNA                            | 14,53 | 0         |
| ENSG00000245648 | ENSG00000245648 | 12 | 10363769  | 10398506  | antisense                          | 14,51 | 0         |
| ENSG00000213801 | ZNF321P         | 19 | 52927135  | 52942601  | transcribed_processed_pseudogene   | 14,50 | 0         |
| ENSG00000232871 | SEC1P           | 19 | 48638071  | 48682245  | unitary_pseudogene                 | 14,50 | 0         |
| ENSG00000266975 | FARSA-AS1       | 19 | 12930522  | 12933296  | antisense                          | 14,50 | 0         |
| ENSG00000267030 | ENSG00000267030 | 19 | 4447304   | 4448217   | antisense                          | 14,50 | 0         |
| ENSG00000278722 | ENSG00000278722 | 13 | 57632759  | 57633575  | antisense                          | 14,50 | 0         |
| ENSG00000256804 | ENSG00000256804 | 12 | 132126461 | 132126764 | processed_pseudogene               | 14,50 | 0         |
| ENSG00000234956 | ENSG00000234956 | 6  | 137730170 | 137738983 | lincRNA                            | 14,50 | 1,40E-02  |
| ENSG00000249417 | ENSG00000249417 | 3  | 141267353 | 141367137 | antisense                          | 14,50 | 0         |
| ENSG00000260261 | ENSG00000260261 | 3  | 195949188 | 195952695 | lincRNA                            | 14,50 | 0         |
| ENSG00000273211 | ENSG00000273211 | 3  | 48985485  | 48985963  | lincRNA                            | 14,50 | 7,06E-02  |
| ENSG00000272807 | ENSG00000272807 | 2  | 210028417 | 210029156 | antisense                          | 14,50 | 0         |
| ENSG00000232450 | ENSG00000232450 | 1  | 113698884 | 113699631 | transcribed_processed_pseudogene   | 14,50 | 0         |
| ENSG00000179277 | MEIS3P1         | 17 | 15786618  | 15787575  | processed_pseudogene               | 14,48 | 0         |
| ENSG00000237248 | LINC00987       | 12 | 9240003   | 9243052   | lincRNA                            | 14,47 | 0         |
| ENSG00000236199 | ENSG00000236199 | 9  | 2041900   | 2046023   | antisense                          | 14,46 | 0         |
| ENSG00000253677 | UBE2HP1         | 8  | 81254870  | 81255229  | processed_pseudogene               | 14,44 | 0         |
| ENSG00000258757 | ENSG00000258757 | 14 | 52640839  | 52641566  | antisense                          | 14,42 | 0         |
| ENSG00000254835 | RNF185-AS1      | 22 | 31205264  | 31205616  | antisense                          | 14,42 | 0         |
| ENSG00000268677 | ENSG00000268677 | 19 | 49688853  | 49690573  | antisense                          | 14,41 | 0         |
| ENSG00000268947 | ENSG00000268947 | 19 | 35262846  | 35264804  | sense_intronic                     | 14,40 | 0         |
| ENSG00000275527 | ENSG00000275527 | 15 | 74598919  | 74599397  | lincRNA                            | 14,40 | 0         |
| ENSG00000259090 | SEPT7P1         | 14 | 35157904  | 35159099  | processed_pseudogene               | 14,40 | 7,06E-02  |
| ENSG00000253476 | ENSG00000253476 | 8  | 25425521  | 25426580  | lincRNA                            | 14,40 | 0         |
| ENSG00000235444 | PSMB3P2         | 2  | 216610342 | 216610959 | processed_pseudogene               | 14,40 | 0,2161218 |
| ENSG00000231551 | ENSG00000231551 | 1  | 148402516 | 148432545 | lincRNA                            | 14,40 | 0         |
| ENSG00000260948 | ENSG00000260948 | 1  | 111431046 | 111433068 | sense_overlapping                  | 14,40 | 0         |
| ENSG00000261254 | ENSG00000261254 | 1  | 100030566 | 100035637 | sense_overlapping                  | 14,40 | 0         |
| ENSG00000272084 | ENSG00000272084 | 1  | 19072110  | 19075511  | 3prime_overlapping_ncrna           | 14,40 | 0         |
| ENSG00000262903 | ENSG00000262903 | 17 | 3655621   | 3658092   | antisense                          | 14,38 | 0         |
| ENSG00000260037 | ENSG00000260037 | 15 | 71818396  | 71823384  | antisense                          | 14,37 | 0         |
| ENSG00000235065 | RPL24P2         | 20 | 21114723  | 21115197  | processed_pseudogene               | 14,34 | 6,27E-03  |
| ENSG00000237682 | ENSG00000237682 | X  | 101537485 | 101539276 | processed_pseudogene               | 14,32 | 0         |
| ENSG00000261126 | ENSG00000261126 | 18 | 80046900  | 80095482  | lincRNA                            | 14,32 | 0         |
| ENSG00000240494 | RPS12P28        | 17 | 28655557  | 28655983  | processed_pseudogene               | 14,30 | 0         |
| ENSG00000262333 | HNRNPA1P16      | 17 | 2306761   | 2307715   | processed_pseudogene               | 14,30 | 0         |
| ENSG00000263400 | TMEM220-AS1     | 17 | 10729777  | 10815164  | antisense                          | 14,30 | 0         |
| ENSG00000256552 | ENSG00000256552 | 12 | 8320381   | 8369555   | transcribed_processed_pseudogene   | 14,30 | 0         |
| ENSG00000260597 | ENSG00000260597 | 12 | 54019910  | 54022589  | lincRNA                            | 14,30 | 0         |
| ENSG00000248996 | ENSG00000248996 | 5  | 177494995 | 177503647 | antisense                          | 14,30 | 0         |
| ENSG00000231147 | ARHGAP42P2      | 2  | 130006200 | 130009123 | unprocessed_pseudogene             | 14,30 | 0         |
| ENSG00000179406 | LINC00174       | 7  | 66376044  | 66401338  | lincRNA                            | 14,28 | 0         |
| ENSG00000215256 | DHRS4-AS1       | 14 | 23938731  | 23988839  | antisense                          | 14,28 | 0         |
| ENSG00000232729 | ENSG00000232729 | 7  | 74688939  | 74729001  | processed_transcript               | 14,25 | 0         |
| ENSG00000122432 | SPATA1          | 1  | 84506291  | 84566194  | transcribed_unprocessed_pseudogene | 14,25 | 0         |
| ENSG00000239246 | ENSG00000239246 | 17 | 62516321  | 62516767  | processed_pseudogene               | 14,22 | 0         |
| ENSG00000272447 | ENSG00000272447 | 10 | 79825902  | 79827602  | lincRNA                            | 14,22 | 0         |
| ENSG00000272814 | ENSG00000272814 | 2  | 46956615  | 46956888  | antisense                          | 14,21 | 0         |



|                 |                 |    |           |           |                                        |       |           |
|-----------------|-----------------|----|-----------|-----------|----------------------------------------|-------|-----------|
| ENSG00000266053 | NDUFV2-AS1      | 18 | 9121265   | 9136645   | antisense                              | 14,20 | 0         |
| ENSG00000188933 | USP32P1         | 17 | 16786489  | 16804455  | transcribed_unprocess<br>ed_pseudogene | 14,20 | 0         |
| ENSG00000263503 | ENSG00000263503 | 17 | 45600869  | 45602340  | processed_pseudogene                   | 14,20 | 0         |
| ENSG00000257271 | KIRREL3-AS1     | 11 | 126543947 | 126610948 | antisense                              | 14,20 | 7,06E-02  |
| ENSG00000232470 | ENSG00000232470 | 10 | 110869743 | 110871594 | lincRNA                                | 14,20 | 0         |
| ENSG00000261643 | ENSG00000261643 | 4  | 3503597   | 3504457   | sense_overlapping                      | 14,20 | 0         |
| ENSG00000214870 | ENSG00000214870 | 7  | 26398593  | 26494256  | lincRNA                                | 14,18 | 3,30E-03  |
| ENSG00000261423 | ENSG00000261423 | 15 | 72407778  | 72475168  | lincRNA                                | 14,16 | 0         |
| ENSG00000272501 | ENSG00000272501 | 6  | 31195200  | 31198037  | antisense                              | 14,13 | 0         |
| ENSG00000214077 | GNAQP1          | 2  | 131423801 | 131424867 | processed_pseudogene                   | 14,13 | 0         |
| ENSG00000248492 | ZFAT-AS1        | 8  | 134598071 | 134600689 | antisense                              | 14,11 | 0         |
| ENSG00000274460 | ENSG00000274460 | 16 | 21950218  | 21951708  | processed_transcript                   | 14,10 | 7,06E-02  |
| ENSG00000256268 | ENSG00000256268 | 12 | 65602869  | 65612997  | lincRNA                                | 14,10 | 0         |
| ENSG00000196167 | COLCA1          | 11 | 111290787 | 111305045 | antisense                              | 14,10 | 0         |
| ENSG00000226576 | ENSG00000226576 | 10 | 48984564  | 49018897  | antisense                              | 14,10 | 0         |
| ENSG00000250899 | ENSG00000250899 | 12 | 3041437   | 3044950   | lincRNA                                | 14,08 | 0         |
| ENSG00000257663 | ENSG00000257663 | 12 | 52076841  | 52082084  | antisense                              | 14,06 | 0         |
| ENSG00000274425 | ENSG00000274425 | 19 | 10333436  | 10336248  | antisense                              | 14,05 | 0         |
| ENSG00000236144 | TMEM147-AS1     | 19 | 35540738  | 35546029  | antisense                              | 14,03 | 0         |
| ENSG00000214185 | XPOTP1          | 20 | 34213495  | 34215892  | processed_pseudogene                   | 14,02 | 0         |
| ENSG00000267372 | ENSG00000267372 | 19 | 1321225   | 1322846   | lincRNA                                | 14,00 | 0         |
| ENSG00000263179 | HNRNCP4         | 16 | 11242653  | 11243552  | processed_pseudogene                   | 14,00 | 0         |
| ENSG00000257350 | ENSG00000257350 | 12 | 55122668  | 55124120  | processed_pseudogene                   | 14,00 | 0         |
| ENSG00000234604 | ENSG00000234604 | 1  | 169474060 | 169474159 | processed_pseudogene                   | 14,00 | 0         |
| ENSG00000157021 | FAM92A1P1       | 15 | 41163162  | 41164374  | unprocessed_pseudoge<br>ne             | 13,95 | 0         |
| ENSG00000263272 | ENSG00000263272 | 17 | 5425139   | 5432876   | antisense                              | 13,93 | 0         |
| ENSG00000247092 | SNHG10          | 14 | 95532297  | 95534872  | antisense                              | 13,93 | 0         |
| ENSG00000232389 | ENSG00000232389 | 6  | 70608234  | 70609334  | processed_pseudogene                   | 13,92 | 0         |
| ENSG00000254510 | ENSG00000254510 | 11 | 66409158  | 66417137  | processed_transcript                   | 13,92 | 4,86E-02  |
| ENSG00000256034 | ENSG00000256034 | 11 | 73760563  | 73761070  | antisense                              | 13,91 | 0         |
| ENSG00000225792 | ENSG00000225792 | 7  | 26372144  | 26376701  | antisense                              | 13,91 | 0         |
| ENSG00000266896 | ENSG00000266896 | 6  | 169770413 | 169772042 | sense_intronic                         | 13,91 | 0         |
| ENSG00000226450 | CYP2D8P         | 22 | 42149886  | 42155001  | unprocessed_pseudoge<br>ne             | 13,90 | 0         |
| ENSG00000261474 | ENSG00000261474 | 16 | 31449535  | 31453493  | lincRNA                                | 13,90 | 0         |
| ENSG00000261644 | ENSG00000261644 | 16 | 50735713  | 50740716  | antisense                              | 13,90 | 0         |
| ENSG00000258376 | ENSG00000258376 | 14 | 73242651  | 73245979  | antisense                              | 13,90 | 0         |
| ENSG00000234043 | ENSG00000234043 | 10 | 91152605  | 91153349  | processed_pseudogene                   | 13,90 | 0         |
| ENSG00000273597 | ENSG00000273597 | 9  | 35001342  | 35002994  | processed_pseudogene                   | 13,90 | 1,40E-02  |
| ENSG00000239254 | ENSG00000239254 | 7  | 139172516 | 139174266 | processed_pseudogene                   | 13,90 | 0,2161218 |
| ENSG00000226445 | ENSG00000226445 | 6  | 169213254 | 169239565 | antisense                              | 13,90 | 0         |
| ENSG00000243592 | RPL17P22        | 5  | 56136979  | 56137531  | processed_pseudogene                   | 13,90 | 0         |
| ENSG00000248213 | CICP16          | 4  | 118635970 | 118638782 | processed_pseudogene                   | 13,90 | 0         |
| ENSG00000198590 | C3orf35         | 3  | 37386269  | 37435497  | lincRNA                                | 13,90 | 0         |
| ENSG00000279873 | LINC01126       | 2  | 43227210  | 43228855  | lincRNA                                | 13,90 | 0         |
| ENSG00000177788 | ENSG00000177788 | 1  | 229258281 | 229271028 | lincRNA                                | 13,90 | 0         |
| ENSG00000266527 | ENSG00000266527 | 17 | 27874645  | 27881237  | antisense                              | 13,88 | 0         |
| ENSG00000259137 | ENSG00000259137 | 14 | 44120210  | 44120761  | processed_pseudogene                   | 13,87 | 0         |
| ENSG00000187534 | PRR13P5         | 19 | 39943239  | 39943680  | processed_pseudogene                   | 13,84 | 0         |
| ENSG00000262456 | ENSG00000262456 | 17 | 2384847   | 2386664   | antisense                              | 13,84 | 0         |
| ENSG00000230022 | FNTAP2          | 13 | 21530690  | 21531323  | processed_pseudogene                   | 13,83 | 0,0358681 |
| ENSG00000267458 | ENSG00000267458 | 19 | 12944118  | 12944487  | antisense                              | 13,83 | 0         |
| ENSG00000242779 | ZNF702P         | 19 | 52968251  | 53037898  | transcribed_processed_<br>pseudogene   | 13,83 | 0         |
| ENSG00000241769 | LINC00893       | X  | 149527591 | 149540959 | antisense                              | 13,82 | 0         |
| ENSG00000258199 | ENSG00000258199 | 12 | 56162359  | 56190284  | sense_overlapping                      | 13,82 | 0         |
| ENSG00000272677 | ENSG00000272677 | 4  | 82374301  | 82384027  | antisense                              | 13,82 | 0         |
| ENSG00000273893 | ENSG00000273893 | 20 | 46681676  | 46682375  | sense_intronic                         | 13,80 | 0         |
| ENSG00000268516 | ENSG00000268516 | 19 | 58257270  | 58278808  | antisense                              | 13,80 | 0         |

|                 |                 |    |           |           |                        |       |           |
|-----------------|-----------------|----|-----------|-----------|------------------------|-------|-----------|
| ENSG00000281005 | LINC00921       | 16 | 3263743   | 3267567   | lincRNA                | 13,80 | 0         |
| ENSG00000243193 | ENSG00000243193 | 7  | 107066591 | 107133733 | processed_transcript   | 13,80 | 0         |
| ENSG00000249244 | ENSG00000249244 | 4  | 119391831 | 119395335 | unprocessed_pseudogene | 13,80 | 0         |
| ENSG00000261533 | ENSG00000261533 | 3  | 100179567 | 100181732 | sense_overlapping      | 13,80 | 0         |
| ENSG00000232800 | SLC7A15P        | 2  | 20386386  | 20396588  | unitary_pseudogene     | 13,80 | 0         |
| ENSG00000237514 | PTP4A1P7        | 1  | 176616273 | 176616786 | processed_pseudogene   | 13,80 | 0         |
| ENSG00000232725 | ENSG00000232725 | X  | 153735626 | 153766478 | antisense              | 13,80 | 0         |
| ENSG00000245849 | RAD51-AS1       | 15 | 40686724  | 40695107  | processed_transcript   | 13,80 | 0         |
| ENSG00000263311 | ENSG00000263311 | 16 | 72004239  | 72004803  | unprocessed_pseudogene | 13,77 | 1,40E-02  |
| ENSG00000261065 | ENSG00000261065 | 1  | 204131062 | 204131966 | antisense              | 13,73 | 0         |
| ENSG00000269106 | ENSG00000269106 | 19 | 58475355  | 58475763  | antisense              | 13,73 | 0         |
| ENSG00000235079 | ZRANB2-AS1      | 1  | 71048855  | 71067184  | antisense              | 13,70 | 0         |
| ENSG00000267355 | RPL9P29         | 17 | 78845953  | 78846868  | processed_pseudogene   | 13,70 | 0         |
| ENSG00000213149 | CNN2P9          | 6  | 110858239 | 110859147 | processed_pseudogene   | 13,70 | 1,40E-02  |
| ENSG00000234789 | ENSG00000234789 | 9  | 129640476 | 129641282 | antisense              | 13,68 | 0         |
| ENSG00000268061 | NAPA-AS1        | 19 | 47484282  | 47501597  | antisense              | 13,68 | 0         |
| ENSG00000237596 | ENSG00000237596 | 6  | 135991936 | 136225751 | antisense              | 13,67 | 0         |
| ENSG00000241889 | ENSG00000241889 | 3  | 113885298 | 113886031 | processed_pseudogene   | 13,67 | 0         |
| ENSG00000213642 | ENSG00000213642 | 7  | 64569428  | 64570437  | processed_pseudogene   | 13,67 | 0         |
| ENSG00000183199 | HSP90AB3P       | 4  | 87891843  | 87894015  | processed_pseudogene   | 13,66 | 0         |
| ENSG00000279571 | ENSG00000279571 | 9  | 127690098 | 127690840 | lincRNA                | 13,64 | 0         |
| ENSG00000261777 | ENSG00000261777 | 16 | 70315640  | 70346747  | processed_transcript   | 13,61 | 0         |
| ENSG00000281404 | LINC01176       | 7  | 30390885  | 30412375  | lincRNA                | 13,60 | 7,06E-02  |
| ENSG00000227212 | PFN1P6          | 1  | 144442606 | 144443004 | processed_pseudogene   | 13,60 | 0         |
| ENSG00000227279 | ENSG00000227279 | 18 | 27954519  | 27963687  | antisense              | 13,59 | 0         |
| ENSG00000260689 | HNRNPA3P11      | 15 | 57246960  | 57247893  | processed_pseudogene   | 13,55 | 0         |
| ENSG00000260892 | ENSG00000260892 | 15 | 75676227  | 75677162  | antisense              | 13,50 | 0         |
| ENSG00000254554 | ENSG00000254554 | 11 | 10302657  | 10303704  | antisense              | 13,50 | 0         |
| ENSG00000226206 | ENSG00000226206 | 9  | 89799695  | 89821753  | lincRNA                | 13,50 | 0         |
| ENSG00000234946 | SDHCP3          | 2  | 23943846  | 23944351  | processed_pseudogene   | 13,50 | 0         |
| ENSG00000174028 | FAM3C2          | X  | 23075758  | 23076767  | processed_pseudogene   | 13,46 | 0         |
| ENSG00000261770 | ENSG00000261770 | 19 | 27757184  | 27760849  | lincRNA                | 13,45 | 0,0358681 |
| ENSG00000232818 | RPS2P32         | 7  | 23490473  | 23491364  | processed_pseudogene   | 13,45 | 0         |
| ENSG00000241288 | ENSG00000241288 | 3  | 125827238 | 125916384 | processed_transcript   | 13,45 | 0         |
| ENSG00000232888 | RPS11P5         | 12 | 132825701 | 132826184 | processed_pseudogene   | 13,42 | 0         |
| ENSG00000224078 | SNHG14          | 15 | 24978583  | 25419462  | processed_transcript   | 13,40 | 0         |
| ENSG00000269549 | ENSG00000269549 | 20 | 45445431  | 45448580  | lincRNA                | 13,40 | 0         |
| ENSG00000263874 | LINC00672       | 17 | 38925168  | 38928057  | lincRNA                | 13,40 | 0         |
| ENSG00000261336 | EIF4BP5         | 16 | 47565090  | 47566884  | processed_pseudogene   | 13,40 | 1,40E-02  |
| ENSG00000238244 | GABARAPL3       | 15 | 90348844  | 90349197  | processed_pseudogene   | 13,40 | 0         |
| ENSG00000263873 | ENSG00000263873 | 11 | 119417951 | 119419114 | sense_intronic         | 13,40 | 7,06E-02  |
| ENSG00000249863 | ENSG00000249863 | 4  | 37868292  | 37869978  | processed_pseudogene   | 13,40 | 0         |
| ENSG00000265298 | ENSG00000265298 | 17 | 64750420  | 64751311  | unprocessed_pseudogene | 13,36 | 0         |
| ENSG00000273466 | ENSG00000273466 | 2  | 218633256 | 218634014 | antisense              | 13,35 | 0         |
| ENSG00000204282 | TNRC6C-AS1      | 17 | 78107398  | 78111799  | processed_transcript   | 13,33 | 0         |
| ENSG00000183562 | ENSG00000183562 | 11 | 2989863   | 2991344   | antisense              | 13,33 | 0         |
| ENSG00000256745 | ENSG00000256745 | 11 | 94188449  | 94188997  | processed_pseudogene   | 13,31 | 0         |
| ENSG00000267655 | ENSG00000267655 | 18 | 79117207  | 79117920  | sense_intronic         | 13,30 | 0         |
| ENSG00000227685 | ENSG00000227685 | 17 | 20612912  | 20633234  | lincRNA                | 13,30 | 0         |
| ENSG00000259244 | ENSG00000259244 | 15 | 84513241  | 84526949  | processed_transcript   | 13,30 | 0         |
| ENSG00000254162 | ENSG00000254162 | 8  | 80535006  | 80539135  | lincRNA                | 13,30 | 0         |
| ENSG00000243243 | ENSG00000243243 | 7  | 116237929 | 116327896 | antisense              | 13,30 | 0         |
| ENSG00000238221 | ENSG00000238221 | 6  | 7276031   | 7298872   | antisense              | 13,29 | 0         |
| ENSG00000257530 | ENSG00000257530 | 12 | 32104117  | 32107528  | antisense              | 13,27 | 0         |
| ENSG00000271976 | ENSG00000271976 | 3  | 53858994  | 53861576  | antisense              | 13,27 | 0         |
| ENSG00000256712 | ENSG00000256712 | 12 | 11166090  | 11171353  | sense_intronic         | 13,23 | 0         |
| ENSG00000268034 | ENSG00000268034 | 19 | 41506152  | 41506898  | processed_pseudogene   | 13,23 | 0         |

|                 |                 |    |           |           |                                        |       |           |
|-----------------|-----------------|----|-----------|-----------|----------------------------------------|-------|-----------|
| ENSG00000265018 | CTGLF12P        | 10 | 48009873  | 48031640  | transcribed_unprocess<br>ed_pseudogene | 13,20 | 0         |
| ENSG00000246582 | ENSG00000246582 | 8  | 23224471  | 23230926  | processed_transcript                   | 13,20 | 0         |
| ENSG00000271367 | ENSG00000271367 | 6  | 53350158  | 53350705  | lincRNA                                | 13,20 | 0         |
| ENSG00000271978 | ENSG00000271978 | 6  | 5031756   | 5054423   | lincRNA                                | 13,20 | 0         |
| ENSG00000250942 | ENPP7P11        | 4  | 9677308   | 9677934   | processed_pseudogene                   | 13,20 | 7,06E-02  |
| ENSG00000232721 | ENSG00000232721 | 1  | 143736066 | 143739506 | lincRNA                                | 13,20 | 1,40E-02  |
| ENSG00000232927 | USP12PY         | X  | 3682805   | 3683868   | processed_pseudogene                   | 13,20 | 0         |
| ENSG00000230154 | ENSG00000230154 | 2  | 11308025  | 11308941  | processed_pseudogene                   | 13,18 | 0         |
| ENSG00000232842 | ENSG00000232842 | X  | 95973328  | 95974315  | processed_pseudogene                   | 13,17 | 0         |
| ENSG00000266341 | ENSG00000266341 | 17 | 48060383  | 48060669  | antisense                              | 13,16 | 0         |
| ENSG00000257779 | ENSG00000257779 | 12 | 63002469  | 63002795  | processed_pseudogene                   | 13,15 | 0         |
| ENSG00000260326 | PHBP21          | 16 | 52934813  | 52935635  | processed_pseudogene                   | 13,15 | 0         |
| ENSG00000176857 | GJA1P1          | 5  | 109051315 | 109052457 | processed_pseudogene                   | 13,15 | 0,3565078 |
| ENSG00000264985 | ENSG00000264985 | 17 | 73513685  | 73518770  | antisense                              | 13,13 | 4,86E-02  |
| ENSG00000260966 | ENSG00000260966 | 11 | 103050687 | 103055799 | sense_overlapping                      | 13,12 | 0         |
| ENSG00000231341 | VDAC1P6         | X  | 5207215   | 5208069   | processed_pseudogene                   | 13,11 | 0         |
| ENSG00000239736 | CEACAMP3        | 19 | 41599735  | 41605984  | transcribed_unprocess<br>ed_pseudogene | 13,10 | 0         |
| ENSG00000272140 | ENSG00000272140 | 10 | 73703735  | 73713581  | lincRNA                                | 13,10 | 0         |
| ENSG00000275160 | ENSG00000275160 | 9  | 41479960  | 41480548  | processed_pseudogene                   | 13,10 | 0         |
| ENSG00000248958 | ZSWIM5P3        | 4  | 129135926 | 129139740 | processed_pseudogene                   | 13,10 | 0         |
| ENSG00000224520 | KRT8P45         | 1  | 157073257 | 157074703 | processed_pseudogene                   | 13,10 | 0         |
| ENSG00000251141 | ENSG00000251141 | 5  | 44744900  | 44808777  | antisense                              | 13,09 | 0         |
| ENSG00000261684 | ENSG00000261684 | 15 | 42531867  | 42532840  | antisense                              | 13,09 | 0         |
| ENSG00000268583 | ENSG00000268583 | 19 | 48204083  | 48213154  | antisense                              | 13,07 | 0         |
| ENSG00000229931 | ENSG00000229931 | 6  | 16761138  | 16762652  | antisense                              | 13,05 | 0         |
| ENSG00000233885 | YEATS2-AS1      | 3  | 183806457 | 183810783 | antisense                              | 13,04 | 0         |
| ENSG00000229944 | EIF4EP2         | 17 | 49424269  | 49424922  | processed_pseudogene                   | 13,02 | 0         |
| ENSG00000266049 | ENSG00000266049 | 18 | 2688564   | 2833065   | antisense                              | 13,00 | 0         |
| ENSG00000268873 | ENSG00000268873 | 18 | 34737795  | 34767663  | antisense                              | 13,00 | 0         |
| ENSG00000260279 | ENSG00000260279 | 16 | 89297508  | 89298317  | antisense                              | 13,00 | 0         |
| ENSG00000260350 | ENSG00000260350 | 16 | 8847650   | 8848724   | antisense                              | 13,00 | 0         |
| ENSG00000276931 | ENSG00000276931 | 16 | 968375    | 969012    | sense_intronic                         | 13,00 | 0         |
| ENSG00000203392 | ENSG00000203392 | 15 | 75678548  | 75680752  | antisense                              | 13,00 | 1,40E-02  |
| ENSG00000255874 | LINC00346       | 13 | 110863987 | 110870251 | lincRNA                                | 13,00 | 0         |
| ENSG00000224899 | ENSG00000224899 | 7  | 125151326 | 125153611 | lincRNA                                | 13,00 | 0         |
| ENSG00000215068 | ENSG00000215068 | 5  | 43041575  | 43045390  | antisense                              | 13,00 | 0         |
| ENSG00000245112 | SMARCA5-AS1     | 4  | 143513472 | 143514635 | antisense                              | 13,00 | 0         |
| ENSG00000225554 | ENSG00000225554 | 1  | 241424292 | 241433492 | lincRNA                                | 13,00 | 7,06E-02  |
| ENSG00000250536 | ABHD17AP3       | 1  | 214605470 | 214608840 | unprocessed_pseudoge<br>ne             | 13,00 | 0         |
| ENSG00000274629 | ENSG00000274629 | 2  | 224464682 | 224474500 | antisense                              | 12,98 | 0         |
| ENSG00000225057 | ENSG00000225057 | 2  | 238231684 | 238255633 | processed_transcript                   | 12,98 | 0         |
| ENSG00000257279 | ENSG00000257279 | 12 | 116977442 | 116987337 | antisense                              | 12,96 | 0         |
| ENSG00000262155 | ENSG00000262155 | 16 | 25066937  | 25068943  | lincRNA                                | 12,96 | 0         |
| ENSG00000258461 | ENSG00000258461 | 15 | 42348103  | 42412317  | processed_transcript                   | 12,95 | 0         |
| ENSG00000233706 | ENSG00000233706 | 1  | 226992140 | 226993206 | antisense                              | 12,94 | 0         |
| ENSG00000227953 | LINC01341       | 1  | 246776013 | 246792385 | processed_transcript                   | 12,91 | 6,27E-03  |
| ENSG00000232530 | ENSG00000232530 | 22 | 30239194  | 30240538  | antisense                              | 12,90 | 1,40E-02  |
| ENSG00000258302 | ENSG00000258302 | 12 | 89561129  | 89594878  | antisense                              | 12,90 | 0         |
| ENSG00000260400 | ENSG00000260400 | 10 | 68698500  | 68700794  | sense_overlapping                      | 12,90 | 0         |
| ENSG00000271361 | HTATSF1P2       | 6  | 3023142   | 3023772   | processed_pseudogene                   | 12,90 | 0         |
| ENSG00000242539 | ENSG00000242539 | 3  | 179396961 | 179399191 | antisense                              | 12,89 | 0         |
| ENSG00000224237 | MINOS1P3        | 3  | 27214816  | 27215018  | processed_pseudogene                   | 12,89 | 7,06E-02  |
| ENSG00000263931 | ENSG00000263931 | 17 | 62935402  | 62966810  | lincRNA                                | 12,87 | 0         |
| ENSG00000228057 | SEC63P1         | 1  | 97545701  | 97546958  | processed_pseudogene                   | 12,85 | 0         |
| ENSG00000248334 | WHAMMP2         | 15 | 28737583  | 28759204  | transcribed_unprocess<br>ed_pseudogene | 12,84 | 0         |
| ENSG00000264932 | ENSG00000264932 | 17 | 19649373  | 19649935  | antisense                              | 12,80 | 0         |
| ENSG00000250790 | ENSG00000250790 | 12 | 132911470 | 132914732 | lincRNA                                | 12,80 | 0         |

|                 |                 |    |           |           |                        |       |           |
|-----------------|-----------------|----|-----------|-----------|------------------------|-------|-----------|
| ENSG00000254851 | ENSG00000254851 | 11 | 117135528 | 117138582 | unprocessed_pseudogene | 12,80 | 1,40E-02  |
| ENSG00000271141 | ENSG00000271141 | 2  | 178616581 | 178617123 | lincRNA                | 12,80 | 0         |
| ENSG00000281162 | LINC01127       | 2  | 101962056 | 101987167 | lincRNA                | 12,80 | 0         |
| ENSG00000269925 | ENSG00000269925 | 1  | 7776383   | 7776775   | sense_intronic         | 12,80 | 0         |
| ENSG00000263756 | ENSG00000263756 | 6  | 32972065  | 32972853  | antisense              | 12,79 | 0         |
| ENSG00000253919 | PRKRIRP7        | 8  | 78760142  | 78762431  | processed_pseudogene   | 12,79 | 0         |
| ENSG00000230221 | ENSG00000230221 | 9  | 95292338  | 95294810  | processed_pseudogene   | 12,75 | 0         |
| ENSG00000267791 | ENSG00000267791 | 19 | 12688922  | 12689238  | antisense              | 12,72 | 0         |
| ENSG00000268565 | ENSG00000268565 | 19 | 4654964   | 4655524   | antisense              | 12,71 | 0         |
| ENSG00000273350 | ENSG00000273350 | 22 | 30420512  | 30420912  | sense_intronic         | 12,70 | 0         |
| ENSG00000262188 | ENSG00000262188 | 17 | 79919357  | 79925462  | lincRNA                | 12,70 | 7,06E-02  |
| ENSG00000273680 | ENSG00000273680 | 12 | 29332733  | 29333383  | antisense              | 12,70 | 0         |
| ENSG00000254963 | ENSG00000254963 | 11 | 75264289  | 75265170  | antisense              | 12,70 | 0         |
| ENSG00000232387 | SKA2P1          | 9  | 122761844 | 122762233 | processed_pseudogene   | 12,70 | 0         |
| ENSG00000204789 | ZNF204P         | 6  | 27357825  | 27360221  | processed_pseudogene   | 12,70 | 0         |
| ENSG00000240050 | ENSG00000240050 | 6  | 116280199 | 116370273 | lincRNA                | 12,70 | 0         |
| ENSG00000237786 | GFOD1-AS1       | 6  | 13486294  | 13486852  | antisense              | 12,64 | 0         |
| ENSG00000229348 | HY1-AS1         | 1  | 43453927  | 43456995  | antisense              | 12,64 | 3,30E-03  |
| ENSG00000235636 | NUS1P1          | X  | 47512602  | 47513483  | processed_pseudogene   | 12,62 | 0         |
| ENSG00000244158 | ENSG00000244158 | 6  | 116460739 | 116463692 | antisense              | 12,62 | 0         |
| ENSG00000225783 | MIAT            | 22 | 26646428  | 26676475  | lincRNA                | 12,60 | 0         |
| ENSG00000231713 | ENSG00000231713 | 21 | 39727755  | 39730680  | lincRNA                | 12,60 | 0         |
| ENSG00000256176 | ENSG00000256176 | 12 | 31311617  | 31312029  | processed_pseudogene   | 12,60 | 0,2161218 |
| ENSG00000255135 | ENSG00000255135 | 11 | 76441338  | 76444656  | lincRNA                | 12,60 | 0         |
| ENSG00000232815 | DUX4L50         | 9  | 63817748  | 63818462  | unprocessed_pseudogene | 12,60 | 0         |
| ENSG00000244219 | ENSG00000244219 | 7  | 99598066  | 99610813  | lincRNA                | 12,60 | 7,06E-02  |
| ENSG00000229727 | ENSG00000229727 | 2  | 7421261   | 7450254   | processed_transcript   | 12,60 | 1,40E-02  |
| ENSG00000272644 | ENSG00000272644 | 2  | 219069354 | 219069809 | lincRNA                | 12,60 | 0         |
| ENSG00000213754 | ENSG00000213754 | X  | 64305047  | 64306733  | processed_pseudogene   | 12,60 | 0,2161218 |
| ENSG00000237126 | ENSG00000237126 | 2  | 232580948 | 232611971 | antisense              | 12,56 | 0         |
| ENSG00000228847 | ATP5G2P4        | X  | 42098754  | 42099173  | processed_pseudogene   | 12,54 | 6,27E-03  |
| ENSG00000234327 | ENSG00000234327 | 17 | 5111468   | 5115004   | processed_transcript   | 12,54 | 1,40E-02  |
| ENSG00000172974 | ENSG00000172974 | 2  | 65205108  | 65205988  | processed_pseudogene   | 12,53 | 0         |
| ENSG00000233521 | ENSG00000233521 | 22 | 27221349  | 27224727  | lincRNA                | 12,50 | 7,06E-02  |
| ENSG00000270001 | ENSG00000270001 | 20 | 23631826  | 23632316  | lincRNA                | 12,50 | 0         |
| ENSG00000273958 | ENSG00000273958 | 15 | 60593027  | 60593460  | lincRNA                | 12,50 | 0         |
| ENSG00000258407 | ENSG00000258407 | 14 | 88010787  | 88015611  | antisense              | 12,50 | 0         |
| ENSG00000276698 | ENSG00000276698 | 14 | 24198433  | 24199090  | lincRNA                | 12,50 | 0         |
| ENSG00000255091 | ENSG00000255091 | 11 | 45651529  | 45652691  | antisense              | 12,50 | 0         |
| ENSG00000270589 | ENSG00000270589 | 10 | 110910596 | 110912244 | antisense              | 12,50 | 0         |
| ENSG00000250320 | ENSG00000250320 | 5  | 84384427  | 84490765  | antisense              | 12,50 | 0         |
| ENSG00000253167 | KIAA0196-AS1    | 8  | 125040684 | 125044989 | antisense              | 12,49 | 0         |
| ENSG00000225026 | ENSG00000225026 | 3  | 12328003  | 12328274  | processed_pseudogene   | 12,46 | 0         |
| ENSG00000213888 | LINC01521       | 22 | 31346777  | 31348719  | lincRNA                | 12,45 | 0         |
| ENSG00000270681 | ENSG00000270681 | 4  | 151139991 | 151141103 | antisense              | 12,44 | 0         |
| ENSG00000267205 | ENSG00000267205 | 19 | 3753840   | 3756517   | antisense              | 12,44 | 0         |
| ENSG00000249700 | SRD5A3-AS1      | 4  | 55363971  | 55395847  | processed_transcript   | 12,42 | 0         |
| ENSG00000274859 | ENSG00000274859 | 12 | 118066398 | 118066725 | antisense              | 12,42 | 0         |
| ENSG00000281538 | ENSG00000281538 | 22 | 42138060  | 42139726  | lincRNA                | 12,40 | 0         |
| ENSG00000256802 | ENSG00000256802 | 15 | 29674990  | 29680957  | antisense              | 12,40 | 0         |
| ENSG00000271882 | ENSG00000271882 | 8  | 101208148 | 101208558 | lincRNA                | 12,40 | 0         |
| ENSG00000273014 | ENSG00000273014 | 7  | 32758882  | 32759353  | lincRNA                | 12,40 | 0         |
| ENSG00000223522 | ENSG00000223522 | 2  | 28307691  | 28310459  | antisense              | 12,40 | 0         |
| ENSG00000246575 | ENSG00000246575 | 2  | 85315041  | 85316529  | unprocessed_pseudogene | 12,40 | 0         |
| ENSG00000243970 | PPIEL           | 1  | 39531838  | 39558707  | unprocessed_pseudogene | 12,40 | 0         |
| ENSG00000278834 | ENSG00000278834 | 17 | 40648300  | 40649718  | antisense              | 12,39 | 0         |
| ENSG00000231167 | YBX1P2          | 7  | 105582258 | 105583256 | processed_pseudogene   | 12,32 | 0         |

|                 |                 |    |           |           |                                  |       |           |
|-----------------|-----------------|----|-----------|-----------|----------------------------------|-------|-----------|
| ENSG00000226284 | ARPC3P1         | 20 | 49134480  | 49135012  | processed_pseudogene             | 12,31 | 0         |
| ENSG00000260924 | LINC01311       | 22 | 19171395  | 19172839  | antisense                        | 12,30 | 1,40E-02  |
| ENSG00000236914 | ENSG00000236914 | 15 | 38069481  | 38072959  | lincRNA                          | 12,30 | 0         |
| ENSG00000282100 | HSP90AB4P       | 15 | 58691106  | 58693125  | processed_pseudogene             | 12,30 | 0,2161218 |
| ENSG00000258985 | ENSG00000258985 | 14 | 53036755  | 53038251  | antisense                        | 12,30 | 0         |
| ENSG00000213365 | ENSG00000213365 | 11 | 72280151  | 72281178  | processed_pseudogene             | 12,30 | 7,06E-02  |
| ENSG00000242474 | ENSG00000242474 | 7  | 135853    | 149466    | lincRNA                          | 12,30 | 0         |
| ENSG00000223774 | ENSG00000223774 | 1  | 201893842 | 201899978 | antisense                        | 12,30 | 0         |
| ENSG00000272405 | ENSG00000272405 | 1  | 156641666 | 156644887 | antisense                        | 12,30 | 0         |
| ENSG00000274422 | ENSG00000274422 | 22 | 22283928  | 22287220  | lincRNA                          | 12,29 | 0         |
| ENSG00000238251 | ENSG00000238251 | 9  | 96407284  | 96407797  | processed_pseudogene             | 12,28 | 0         |
| ENSG00000261663 | ENSG00000261663 | 16 | 2240487   | 2241818   | antisense                        | 12,27 | 3,30E-03  |
| ENSG00000229127 | ENSG00000229127 | 2  | 210030733 | 210064356 | antisense                        | 12,27 | 0         |
| ENSG00000256737 | RBBP4P5         | 14 | 21563819  | 21565084  | processed_pseudogene             | 12,27 | 0         |
| ENSG00000217239 | ENSG00000217239 | 6  | 5788346   | 5788699   | processed_pseudogene             | 12,23 | 3,30E-03  |
| ENSG00000230630 | DNM3OS          | 1  | 172136531 | 172144794 | antisense                        | 12,23 | 0         |
| ENSG00000226706 | ENSG00000226706 | 9  | 135503273 | 135506447 | antisense                        | 12,23 | 0         |
| ENSG00000275494 | ENSG00000275494 | 16 | 25106569  | 25107102  | sense_intronic                   | 12,20 | 0         |
| ENSG00000258260 | ENSG00000258260 | 12 | 56267793  | 56270104  | antisense                        | 12,20 | 0         |
| ENSG00000275318 | ENSG00000275318 | 9  | 92840955  | 92841688  | unprocessed_pseudogene           | 12,20 | 0         |
| ENSG00000259820 | ENSG00000259820 | 8  | 134792020 | 134798272 | lincRNA                          | 12,20 | 0         |
| ENSG00000272656 | ENSG00000272656 | 3  | 139349024 | 139349371 | antisense                        | 12,20 | 0         |
| ENSG00000280374 | ENSG00000280374 | 2  | 177317715 | 177318471 | sense_intronic                   | 12,20 | 0         |
| ENSG00000233184 | ENSG00000233184 | 1  | 101025878 | 101087268 | antisense                        | 12,19 | 0         |
| ENSG00000227230 | ENSG00000227230 | 1  | 243135898 | 243140588 | antisense                        | 12,18 | 0         |
| ENSG00000278921 | EPB41LA-AS2     | 5  | 112419583 | 112420978 | lincRNA                          | 12,18 | 0         |
| ENSG00000246334 | PRR7-AS1        | 5  | 177438503 | 177447699 | antisense                        | 12,17 | 0         |
| ENSG00000244153 | WWP1P1          | 3  | 98657802  | 98660570  | processed_pseudogene             | 12,17 | 0         |
| ENSG00000182574 | ENSG00000182574 | X  | 100956593 | 100957538 | processed_pseudogene             | 12,17 | 0         |
| ENSG00000278768 | BACE1-AS        | 11 | 117290874 | 117293571 | antisense                        | 12,15 | 0         |
| ENSG00000246859 | STARD4-AS1      | 5  | 111512226 | 111739726 | antisense                        | 12,15 | 0         |
| ENSG00000225194 | LINC00092       | 9  | 96019732  | 96027965  | lincRNA                          | 12,15 | 0         |
| ENSG00000228878 | SEPT7-AS1       | 7  | 35751856  | 35800616  | lincRNA                          | 12,15 | 0         |
| ENSG00000214561 | RBBP4P4         | 6  | 58119741  | 58121029  | processed_pseudogene             | 12,14 | 0         |
| ENSG00000223725 | ENSG00000223725 | 2  | 207239864 | 207529795 | antisense                        | 12,13 | 0         |
| ENSG00000267040 | ENSG00000267040 | 18 | 57630302  | 57669296  | antisense                        | 12,12 | 0         |
| ENSG00000259581 | TYRO3P          | 15 | 76258986  | 76261690  | processed_pseudogene             | 12,12 | 0         |
| ENSG00000233868 | ENSG00000233868 | 2  | 221944223 | 221944612 | processed_pseudogene             | 12,11 | 0         |
| ENSG00000230928 | ENSG00000230928 | 10 | 98252023  | 98256575  | antisense                        | 12,10 | 0         |
| ENSG00000254363 | ENSG00000254363 | 5  | 140157319 | 140173051 | processed_transcript             | 12,10 | 0         |
| ENSG00000270426 | ENSG00000270426 | 4  | 184471924 | 184472609 | sense_intronic                   | 12,10 | 1,40E-02  |
| ENSG00000244300 | GATA2-AS1       | 3  | 128489212 | 128502348 | antisense                        | 12,10 | 0         |
| ENSG00000237641 | ENSG00000237641 | 2  | 231789481 | 231789887 | processed_pseudogene             | 12,10 | 0         |
| ENSG00000234115 | ENSG00000234115 | 6  | 7516600   | 7517840   | processed_pseudogene             | 12,08 | 0         |
| ENSG00000234945 | GTF3C2-AS1      | 2  | 27335535  | 27342599  | antisense                        | 12,08 | 0         |
| ENSG00000272106 | ENSG00000272106 | 1  | 1613758   | 1615795   | antisense                        | 12,06 | 0         |
| ENSG00000248697 | TOX4P1          | 4  | 112455924 | 112457785 | processed_pseudogene             | 12,05 | 0         |
| ENSG00000269388 | ENSG00000269388 | 19 | 51594561  | 51606150  | transcribed_processed_pseudogene | 12,00 | 7,06E-02  |
| ENSG00000262089 | ENSG00000262089 | 17 | 6994642   | 6995189   | lincRNA                          | 12,00 | 6,27E-03  |
| ENSG00000226180 | ENSG00000226180 | 16 | 87693537  | 87696147  | lincRNA                          | 12,00 | 0         |
| ENSG00000275149 | ENSG00000275149 | 13 | 40079106  | 40273509  | lincRNA                          | 12,00 | 1,40E-02  |
| ENSG00000257802 | ENSG00000257802 | 12 | 71849228  | 71850428  | processed_pseudogene             | 12,00 | 1,40E-02  |
| ENSG00000242798 | ENSG00000242798 | 7  | 100115214 | 100127139 | antisense                        | 12,00 | 0         |
| ENSG00000223821 | ENSG00000223821 | 6  | 73492025  | 73492742  | antisense                        | 12,00 | 0         |
| ENSG00000273345 | ENSG00000273345 | 5  | 134205614 | 134371044 | processed_transcript             | 12,00 | 0         |
| ENSG00000184139 | RPL7AP28        | 4  | 131857343 | 131857913 | processed_pseudogene             | 12,00 | 0         |
| ENSG00000242428 | C3orf67-AS1     | 3  | 58824437  | 59019093  | antisense                        | 12,00 | 0         |
| ENSG00000271452 | ENSG00000271452 | 2  | 75669989  | 75670454  | sense_intronic                   | 12,00 | 0         |

|                 |                 |    |           |           |                                    |       |           |
|-----------------|-----------------|----|-----------|-----------|------------------------------------|-------|-----------|
| ENSG00000224775 | BRAF1           | X  | 75582676  | 75585506  | unprocessed_pseudogene             | 12,00 | 0         |
| ENSG00000236756 | DNAJC9-AS1      | 10 | 73247360  | 73276984  | antisense                          | 11,99 | 0         |
| ENSG00000269352 | PTOV1-AS2       | 19 | 49856970  | 49859289  | antisense                          | 11,99 | 0         |
| ENSG00000280213 | UCKL1-AS1       | 20 | 63953384  | 63956985  | antisense                          | 11,91 | 0         |
| ENSG00000237187 | NR2F1-AS1       | 5  | 93409359  | 93585648  | antisense                          | 11,91 | 0         |
| ENSG00000184809 | B3GALT5-AS1     | 21 | 39597147  | 39612821  | antisense                          | 11,91 | 0         |
| ENSG00000272908 | ENSG00000272908 | 7  | 38326070  | 38329643  | lincRNA                            | 11,91 | 0         |
| ENSG00000255929 | ENSG00000255929 | 11 | 94545330  | 94740355  | antisense                          | 11,90 | 0         |
| ENSG00000267344 | ENSG00000267344 | 17 | 45396932  | 45397477  | antisense                          | 11,90 | 0         |
| ENSG00000225746 | SNHG23          | 14 | 100937401 | 100960199 | lincRNA                            | 11,90 | 0         |
| ENSG00000272092 | ENSG00000272092 | 8  | 38382364  | 38383461  | lincRNA                            | 11,90 | 0         |
| ENSG00000213057 | C1orf220        | 1  | 178542752 | 178548889 | lincRNA                            | 11,90 | 0         |
| ENSG00000226862 | ENSG00000226862 | 1  | 202604268 | 202605293 | antisense                          | 11,90 | 7,06E-02  |
| ENSG00000234546 | ENSG00000234546 | 1  | 9182004   | 9196284   | lincRNA                            | 11,90 | 3,30E-03  |
| ENSG00000215414 | PSMA6P1         | X  | 13286638  | 13287378  | processed_pseudogene               | 11,90 | 0         |
| ENSG00000224914 | LINC00863       | 10 | 87342736  | 87357882  | lincRNA                            | 11,89 | 0         |
| ENSG00000260807 | ENSG00000260807 | 16 | 975761    | 981596    | lincRNA                            | 11,87 | 7,06E-02  |
| ENSG00000227372 | TP73-AS1        | 1  | 3735601   | 3747336   | antisense                          | 11,86 | 0         |
| ENSG00000272913 | ENSG00000272913 | 2  | 95525109  | 95526702  | lincRNA                            | 11,86 | 0         |
| ENSG00000229334 | ENSG00000229334 | 3  | 194632923 | 194645401 | antisense                          | 11,86 | 0         |
| ENSG00000254473 | ENSG00000254473 | 9  | 83707594  | 83713378  | antisense                          | 11,86 | 0         |
| ENSG00000268996 | MAN1B1-AS1      | 9  | 137084946 | 137086817 | antisense                          | 11,83 | 0         |
| ENSG00000255438 | ENSG00000255438 | 20 | 47677901  | 47686297  | antisense                          | 11,83 | 0         |
| ENSG00000223923 | ENSG00000223923 | 2  | 217978707 | 217992615 | antisense                          | 11,82 | 0         |
| ENSG00000272872 | ENSG00000272872 | 22 | 15823197  | 15823890  | sense_intronic                     | 11,80 | 0         |
| ENSG00000275902 | ENSG00000275902 | 17 | 81697025  | 81697714  | antisense                          | 11,80 | 0         |
| ENSG00000239763 | ENSG00000239763 | 16 | 74312609  | 74313390  | processed_pseudogene               | 11,80 | 0         |
| ENSG00000277999 | ENSG00000277999 | 16 | 29272220  | 29272772  | lincRNA                            | 11,80 | 0         |
| ENSG00000258399 | MEG8            | 14 | 100894770 | 100935999 | lincRNA                            | 11,80 | 0         |
| ENSG00000274956 | ENSG00000274956 | 8  | 62977861  | 62984900  | lincRNA                            | 11,80 | 0         |
| ENSG00000272693 | ENSG00000272693 | 7  | 65647010  | 65770810  | lincRNA                            | 11,80 | 0         |
| ENSG00000231668 | PPP2R2DP1       | 3  | 38051759  | 38052395  | processed_pseudogene               | 11,80 | 0,2161218 |
| ENSG00000273455 | ENSG00000273455 | 3  | 136087475 | 136087913 | antisense                          | 11,80 | 0         |
| ENSG00000227817 | ARHGAP42P1      | 2  | 131328176 | 131330857 | unprocessed_pseudogene             | 11,80 | 0         |
| ENSG00000223356 | ENSG00000223356 | 1  | 156712212 | 156713174 | antisense                          | 11,80 | 7,06E-02  |
| ENSG00000227082 | ENSG00000227082 | 1  | 121396754 | 121463129 | lincRNA                            | 11,80 | 0         |
| ENSG00000273129 | PACERR          | 1  | 186680622 | 186681446 | lincRNA                            | 11,80 | 0         |
| ENSG00000267278 | MAP3K14-AS1     | 17 | 45247925  | 45268630  | antisense                          | 11,77 | 0         |
| ENSG00000231259 | ENSG00000231259 | 2  | 87031815  | 87053069  | unprocessed_pseudogene             | 11,76 | 0         |
| ENSG00000213742 | ZNF337-AS1      | 20 | 25624045  | 25678074  | antisense                          | 11,75 | 0         |
| ENSG00000223519 | KIF28P          | 1  | 246771837 | 246830059 | unitary_pseudogene                 | 11,74 | 0         |
| ENSG00000255498 | ENSG00000255498 | 11 | 45905941  | 45906461  | antisense                          | 11,73 | 0         |
| ENSG00000262313 | ENSG00000262313 | 17 | 80940418  | 80942033  | antisense                          | 11,73 | 0         |
| ENSG00000278616 | BEND3P3         | 10 | 79682997  | 79685436  | processed_pseudogene               | 11,71 | 0         |
| ENSG00000269982 | ENSG00000269982 | 3  | 9958717   | 9962539   | antisense                          | 11,71 | 0         |
| ENSG00000189423 | USP32P3         | 17 | 20415547  | 20431008  | transcribed_unprocessed_pseudogene | 11,70 | 0         |
| ENSG00000263644 | ENSG00000263644 | 17 | 63391191  | 63431089  | antisense                          | 11,70 | 0         |
| ENSG00000266651 | ENSG00000266651 | 17 | 16440479  | 16440952  | lincRNA                            | 11,70 | 0         |
| ENSG00000273723 | ENSG00000273723 | 13 | 52651305  | 52652279  | lincRNA                            | 11,70 | 0         |
| ENSG00000254966 | ENSG00000254966 | 11 | 18706537  | 18740568  | antisense                          | 11,70 | 0         |
| ENSG00000227462 | ENSG00000227462 | 10 | 22225698  | 22226024  | processed_pseudogene               | 11,70 | 0         |
| ENSG00000272777 | ENSG00000272777 | 4  | 99067256  | 99068125  | lincRNA                            | 11,70 | 1,40E-02  |
| ENSG00000233589 | ENSG00000233589 | 1  | 68479129  | 68483539  | antisense                          | 11,70 | 0         |
| ENSG00000251359 | WWC2-AS2        | 4  | 183097017 | 183099199 | lincRNA                            | 11,69 | 0         |
| ENSG00000272054 | ENSG00000272054 | 2  | 37208875  | 37212677  | sense_intronic                     | 11,68 | 0         |
| ENSG00000078319 | PMS2P1          | 7  | 100320992 | 100341908 | unprocessed_pseudogene             | 11,68 | 0         |

|                 |                 |    |           |           |                                        |       |           |
|-----------------|-----------------|----|-----------|-----------|----------------------------------------|-------|-----------|
| ENSG00000263165 | ENSG00000263165 | 17 | 4163910   | 4164713   | antisense                              | 11,64 | 0         |
| ENSG00000240571 | ENSG00000240571 | 7  | 130173718 | 130205361 | antisense                              | 11,63 | 0         |
| ENSG00000228941 | UBE3AP2         | 21 | 31060600  | 31063168  | processed_pseudogene                   | 11,62 | 0,3565078 |
| ENSG00000272476 | ENSG00000272476 | 6  | 107957413 | 107959986 | antisense                              | 11,62 | 0         |
| ENSG00000268670 | ENSG00000268670 | 19 | 4061615   | 4062749   | sense_intronic                         | 11,60 | 0         |
| ENSG00000254676 | ENSG00000254676 | 11 | 83180144  | 83184520  | sense_overlapping                      | 11,60 | 0         |
| ENSG00000218772 | FAM8A6P         | 6  | 134603564 | 134604698 | processed_pseudogene                   | 11,60 | 0         |
| ENSG00000268592 | ENSG00000268592 | 6  | 149863494 | 149919507 | antisense                              | 11,60 | 0         |
| ENSG00000235927 | NEXN-AS1        | 1  | 77881348  | 77889539  | antisense                              | 11,60 | 0         |
| ENSG00000267620 | ENSG00000267620 | 18 | 60196555  | 60198172  | processed_pseudogene                   | 11,59 | 0         |
| ENSG00000214855 | APOC1P1         | 19 | 44926804  | 44931386  | transcribed_unprocess<br>ed_pseudogene | 11,58 | 0,0358681 |
| ENSG00000274245 | ENSG00000274245 | 1  | 207372559 | 207373252 | lincRNA                                | 11,58 | 0,0358681 |
| ENSG00000205794 | ENSG00000205794 | 4  | 40042917  | 40057199  | transcribed_processed_<br>pseudogene   | 11,58 | 0         |
| ENSG00000266680 | ENSG00000266680 | 6  | 63571005  | 63572408  | antisense                              | 11,57 | 0         |
| ENSG00000262766 | ENSG00000262766 | 16 | 31118078  | 31118747  | sense_intronic                         | 11,56 | 0         |
| ENSG00000245213 | ENSG00000245213 | 4  | 173131928 | 173169652 | antisense                              | 11,56 | 0         |
| ENSG00000267705 | ENSG00000267705 | 18 | 58752179  | 58753898  | lincRNA                                | 11,53 | 0         |
| ENSG00000230897 | RPS18P12        | 17 | 14705076  | 14705534  | processed_pseudogene                   | 11,51 | 0         |
| ENSG00000245385 | ENSG00000245385 | 11 | 119336249 | 119337309 | antisense                              | 11,51 | 0         |
| ENSG00000272977 | ENSG00000272977 | 22 | 25476218  | 25479971  | sense_intronic                         | 11,50 | 0         |
| ENSG00000230865 | TSEN15P1        | 17 | 17456427  | 17457259  | processed_pseudogene                   | 11,50 | 0         |
| ENSG00000265136 | ENSG00000265136 | 17 | 82576616  | 82577391  | processed_pseudogene                   | 11,50 | 1,40E-02  |
| ENSG00000266998 | ENSG00000266998 | 17 | 77373818  | 77377236  | antisense                              | 11,50 | 0         |
| ENSG00000242902 | ENSG00000242902 | 7  | 128850162 | 128862626 | antisense                              | 11,50 | 0         |
| ENSG00000228643 | ENSG00000228643 | 2  | 286419    | 301515    | processed_transcript                   | 11,50 | 7,06E-02  |
| ENSG00000215833 | QRSL1P1         | 1  | 168449672 | 168451211 | processed_pseudogene                   | 11,50 | 0,2161218 |
| ENSG00000251661 | ENSG00000251661 | 11 | 318640    | 325631    | antisense                              | 11,46 | 0         |
| ENSG00000248827 | ENSG00000248827 | 5  | 107724961 | 107727117 | processed_pseudogene                   | 11,46 | 0         |
| ENSG00000251429 | ENSG00000251429 | 4  | 158270378 | 158278676 | transcribed_processed_<br>pseudogene   | 11,45 | 0         |
| ENSG00000273472 | ENSG00000273472 | 4  | 140756528 | 140757921 | lincRNA                                | 11,45 | 0         |
| ENSG00000250116 | ENSG00000250116 | 2  | 46568256  | 46580238  | antisense                              | 11,45 | 0         |
| ENSG00000238222 | MKRN4P          | X  | 40834485  | 40836005  | processed_pseudogene                   | 11,45 | 0         |
| ENSG00000240875 | LINC00886       | 3  | 156747346 | 156817062 | lincRNA                                | 11,43 | 0         |
| ENSG00000255085 | ENSG00000255085 | 8  | 144700353 | 144708517 | transcribed_unprocess<br>ed_pseudogene | 11,41 | 0         |
| ENSG00000266405 | CBX3P2          | 18 | 2652170   | 2655395   | transcribed_processed_<br>pseudogene   | 11,40 | 0         |
| ENSG00000278000 | ENSG00000278000 | 18 | 80161752  | 80162413  | sense_intronic                         | 11,40 | 7,06E-02  |
| ENSG00000230662 | TNPO1P2         | 17 | 18460391  | 18463055  | processed_pseudogene                   | 11,40 | 0         |
| ENSG00000259493 | ENSG00000259493 | 15 | 79559256  | 79560304  | processed_pseudogene                   | 11,40 | 0         |
| ENSG00000260669 | ENSG00000260669 | 14 | 24209646  | 24215987  | processed_transcript                   | 11,40 | 0         |
| ENSG00000253667 | ENSG00000253667 | 8  | 53971231  | 53974210  | processed_pseudogene                   | 11,40 | 7,06E-02  |
| ENSG00000233028 | ENSG00000233028 | 7  | 56175634  | 56176412  | processed_pseudogene                   | 11,40 | 0,2161218 |
| ENSG00000248676 | ENSG00000248676 | 4  | 99594799  | 99625913  | antisense                              | 11,40 | 0         |
| ENSG00000243422 | RPL23AP49       | 3  | 75624686  | 75625153  | processed_pseudogene                   | 11,40 | 0         |
| ENSG00000235954 | TTC28-AS1       | 22 | 27919376  | 28008581  | processed_transcript                   | 11,37 | 0         |
| ENSG00000232860 | SMG7-AS1        | 1  | 183460874 | 183472265 | processed_transcript                   | 11,37 | 0         |
| ENSG00000213326 | RPS7P11         | 17 | 46721582  | 46722167  | processed_pseudogene                   | 11,35 | 6,27E-03  |
| ENSG00000262831 | ENSG00000262831 | 17 | 81843165  | 81843958  | antisense                              | 11,35 | 0         |
| ENSG00000232400 | RAD17P1         | 7  | 16864267  | 16866308  | processed_pseudogene                   | 11,33 | 6,27E-03  |
| ENSG00000231841 | ENSG00000231841 | 4  | 152927446 | 152928207 | processed_pseudogene                   | 11,33 | 0         |
| ENSG00000279730 | SETD8P1         | 13 | 18297554  | 18298733  | processed_pseudogene                   | 11,32 | 0         |
| ENSG00000267649 | ENSG00000267649 | 19 | 55216660  | 55221616  | lincRNA                                | 11,30 | 0         |
| ENSG00000271347 | ENSG00000271347 | 15 | 24991486  | 24991753  | sense_intronic                         | 11,30 | 0         |
| ENSG00000257954 | ENSG00000257954 | 12 | 49389516  | 49390162  | processed_pseudogene                   | 11,30 | 7,06E-02  |
| ENSG00000271327 | ENSG00000271327 | 12 | 89367807  | 89369301  | lincRNA                                | 11,30 | 7,06E-02  |
| ENSG00000253608 | ENSG00000253608 | 8  | 48551567  | 48698510  | antisense                              | 11,30 | 0         |

|                 |                 |    |           |           |                                    |       |           |
|-----------------|-----------------|----|-----------|-----------|------------------------------------|-------|-----------|
| ENSG00000244480 | ENSG00000244480 | 7  | 30523143  | 30524535  | transcribed_processed_pseudogene   | 11,30 | 1,40E-02  |
| ENSG00000272217 | ENSG00000272217 | 6  | 33246075  | 33246856  | lincRNA                            | 11,30 | 1,40E-02  |
| ENSG00000272588 | ENSG00000272588 | 4  | 757022    | 757740    | antisense                          | 11,30 | 0         |
| ENSG00000234617 | SNRK-AS1        | 3  | 43349644  | 43351962  | antisense                          | 11,30 | 0         |
| ENSG00000230212 | ENSG00000230212 | 21 | 36069642  | 36126640  | sense_intronic                     | 11,27 | 0         |
| ENSG00000179141 | MTUS2-AS1       | 13 | 29476515  | 29490105  | antisense                          | 11,26 | 0,1217903 |
| ENSG00000259185 | ENSG00000259185 | 15 | 51908902  | 51909642  | antisense                          | 11,26 | 0         |
| ENSG00000226377 | ENSG00000226377 | 17 | 32876759  | 32878637  | antisense                          | 11,25 | 0         |
| ENSG00000237008 | LAPTM4BP1       | 1  | 153379821 | 153380799 | processed_pseudogene               | 11,24 | 1,40E-02  |
| ENSG00000266402 | SNHG25          | 17 | 64145970  | 64146476  | lincRNA                            | 11,20 | 0,1392851 |
| ENSG00000275630 | ENSG00000275630 | 14 | 70822004  | 70823984  | lincRNA                            | 11,20 | 7,06E-02  |
| ENSG00000214776 | ENSG00000214776 | 12 | 9467552   | 9576275   | transcribed_unprocessed_pseudogene | 11,20 | 0         |
| ENSG00000271335 | ENSG00000271335 | 10 | 35314552  | 35336401  | antisense                          | 11,20 | 0         |
| ENSG00000272983 | ENSG00000272983 | 10 | 38137337  | 38144399  | lincRNA                            | 11,20 | 0         |
| ENSG00000253320 | AZIN1-AS1       | 8  | 102864300 | 102977876 | antisense                          | 11,20 | 0         |
| ENSG00000250889 | LINC01336       | 5  | 75047719  | 75052843  | lincRNA                            | 11,20 | 0         |
| ENSG00000243629 | LINC00880       | 3  | 157081667 | 157123004 | lincRNA                            | 11,20 | 0         |
| ENSG00000264443 | ENSG00000264443 | 1  | 24538802  | 24556024  | lincRNA                            | 11,20 | 0         |
| ENSG00000215030 | RPL13P12        | 17 | 17383377  | 17384012  | processed_pseudogene               | 11,20 | 0         |
| ENSG00000264982 | ENSG00000264982 | 18 | 32287437  | 32290340  | antisense                          | 11,19 | 0         |
| ENSG00000258377 | ENSG00000258377 | 14 | 49620815  | 49623480  | antisense                          | 11,18 | 0         |
| ENSG00000274554 | ENSG00000274554 | 12 | 116948738 | 116951422 | antisense                          | 11,18 | 0         |
| ENSG00000249996 | ENSG00000249996 | 5  | 123036271 | 123054667 | antisense                          | 11,18 | 0         |
| ENSG00000267924 | ENSG00000267924 | 19 | 23817599  | 23874701  | lincRNA                            | 11,16 | 0,2161218 |
| ENSG00000230289 | ENSG00000230289 | 9  | 131516558 | 131522229 | antisense                          | 11,14 | 0         |
| ENSG00000260755 | ENSG00000260755 | 16 | 66509437  | 66510048  | lincRNA                            | 11,13 | 0         |
| ENSG00000233585 | ENSG00000233585 | X  | 48775993  | 48776970  | processed_pseudogene               | 11,11 | 0         |
| ENSG00000228606 | ENSG00000228606 | 1  | 160261744 | 160262778 | antisense                          | 11,11 | 0         |
| ENSG00000272316 | ENSG00000272316 | 6  | 57908560  | 57913911  | lincRNA                            | 11,11 | 0         |
| ENSG00000276071 | ENSG00000276071 | 19 | 36668102  | 36669404  | lincRNA                            | 11,10 | 0         |
| ENSG00000260578 | ENSG00000260578 | 18 | 67481791  | 67484966  | lincRNA                            | 11,10 | 1,40E-02  |
| ENSG00000261416 | ENSG00000261416 | 16 | 30183505  | 30184957  | antisense                          | 11,10 | 0         |
| ENSG00000270195 | ENSG00000270195 | 4  | 1712821   | 1713622   | lincRNA                            | 11,10 | 0         |
| ENSG00000273369 | ENSG00000273369 | 4  | 44693946  | 44694386  | antisense                          | 11,10 | 0         |
| ENSG00000234329 | ENSG00000234329 | 1  | 45651039  | 45651826  | processed_pseudogene               | 11,10 | 0         |
| ENSG00000237278 | RLIMP2          | 1  | 113125321 | 113126883 | processed_pseudogene               | 11,10 | 0         |
| ENSG00000267379 | ENSG00000267379 | 19 | 14402717  | 14408723  | antisense                          | 11,10 | 0         |
| ENSG00000273132 | ENSG00000273132 | 6  | 149852462 | 149853192 | antisense                          | 11,09 | 0         |
| ENSG00000225798 | ENSG00000225798 | 15 | 58889967  | 58894082  | antisense                          | 11,08 | 0         |
| ENSG00000249245 | ENSG00000249245 | 4  | 145624159 | 145626035 | processed_pseudogene               | 11,07 | 0         |
| ENSG00000253327 | RAD21-AS1       | 8  | 116874424 | 116876868 | antisense                          | 11,06 | 0         |
| ENSG00000236636 | ENSG00000236636 | 1  | 227264776 | 227265207 | processed_pseudogene               | 11,06 | 1,40E-02  |
| ENSG00000262470 | TVP23CP2        | 16 | 14200357  | 14200979  | processed_pseudogene               | 11,05 | 1,40E-02  |
| ENSG00000277459 | ENSG00000277459 | 11 | 102109827 | 102110457 | lincRNA                            | 11,05 | 0         |
| ENSG00000247903 | ENSG00000247903 | 12 | 26971586  | 26979582  | antisense                          | 11,03 | 0         |
| ENSG00000267612 | ENSG00000267612 | 19 | 9730853   | 9731943   | lincRNA                            | 11,00 | 7,06E-02  |
| ENSG00000261560 | ENSG00000261560 | 16 | 11881075  | 11882569  | sense_intronic                     | 11,00 | 0         |
| ENSG00000236426 | ENSG00000236426 | 10 | 119330233 | 119336182 | antisense                          | 11,00 | 0         |
| ENSG00000260193 | ENSG00000260193 | 9  | 136107808 | 136109424 | lincRNA                            | 11,00 | 0         |
| ENSG00000214544 | GTF2IRD2P1      | 7  | 73242751  | 73280119  | transcribed_unprocessed_pseudogene | 11,00 | 0         |
| ENSG00000270558 | ENSG00000270558 | 5  | 37286449  | 37286977  | processed_pseudogene               | 11,00 | 1,40E-02  |
| ENSG00000249661 | TNRC18P1        | 4  | 140641840 | 140645489 | processed_pseudogene               | 11,00 | 0         |
| ENSG00000242545 | ENSG00000242545 | 3  | 59464330  | 59510678  | lincRNA                            | 11,00 | 0         |
| ENSG00000213226 | ENSG00000213226 | 1  | 147319110 | 147320224 | processed_pseudogene               | 11,00 | 0         |
| ENSG00000214111 | ENSG00000214111 | X  | 25029545  | 25030235  | processed_pseudogene               | 11,00 | 7,06E-02  |
| ENSG00000258777 | HIF1A-AS1       | 14 | 61681041  | 61695823  | lincRNA                            | 10,94 | 0         |
| ENSG00000226544 | RPL7P22         | 5  | 72725419  | 72726151  | processed_pseudogene               | 10,94 | 0         |



|                 |                 |    |           |           |                                        |       |           |
|-----------------|-----------------|----|-----------|-----------|----------------------------------------|-------|-----------|
| ENSG00000233325 | MIPEPP3         | 13 | 21298139  | 21306373  | transcribed_unprocess<br>ed_pseudogene | 10,92 | 0         |
| ENSG00000229589 | ACVR2B-AS1      | 3  | 38451027  | 38454820  | antisense                              | 10,91 | 0         |
| ENSG00000215559 | ANKRD20A11P     | 21 | 13909574  | 13980437  | transcribed_unprocess<br>ed_pseudogene | 10,90 | 0         |
| ENSG00000228798 | ENSG00000228798 | 21 | 16630827  | 16640683  | lincRNA                                | 10,90 | 1,40E-02  |
| ENSG00000275413 | ENSG00000275413 | 17 | 16023323  | 16023653  | antisense                              | 10,90 | 0         |
| ENSG00000259448 | ENSG00000259448 | 15 | 31216020  | 31224445  | lincRNA                                | 10,90 | 0         |
| ENSG00000269951 | ENSG00000269951 | 15 | 77067654  | 77068325  | sense_intronic                         | 10,90 | 0         |
| ENSG00000243433 | ENSG00000243433 | 7  | 151028781 | 151029754 | antisense                              | 10,90 | 0         |
| ENSG00000271553 | ENSG00000271553 | 7  | 128667043 | 128668156 | lincRNA                                | 10,90 | 0         |
| ENSG00000270419 | CAHM            | 6  | 163413065 | 163413960 | lincRNA                                | 10,90 | 1,40E-02  |
| ENSG00000229220 | ENSG00000229220 | 1  | 200147531 | 200148279 | processed_pseudogene                   | 10,90 | 0         |
| ENSG00000219186 | FTH1P19         | X  | 37492021  | 37492548  | unprocessed_pseudoge<br>ne             | 10,90 | 0         |
| ENSG00000251186 | ENSG00000251186 | 4  | 8453410   | 8454942   | antisense                              | 10,89 | 0         |
| ENSG00000234118 | RPL13AP6        | 10 | 110936622 | 110937233 | processed_pseudogene                   | 10,86 | 0,1836819 |
| ENSG00000273888 | FRMD6-AS1       | 14 | 51649516  | 51651744  | antisense                              | 10,85 | 0         |
| ENSG00000204253 | HNRNP2          | 2  | 189923336 | 189924216 | processed_pseudogene                   | 10,84 | 0         |
| ENSG00000268635 | ENSG00000268635 | 11 | 77473371  | 77477030  | antisense                              | 10,83 | 0         |
| ENSG00000256747 | ENSG00000256747 | 12 | 27779821  | 27781067  | antisense                              | 10,83 | 0         |
| ENSG00000182397 | DNM1P46         | 15 | 99790156  | 99806927  | transcribed_unprocess<br>ed_pseudogene | 10,81 | 0         |
| ENSG00000259363 | ENSG00000259363 | 15 | 99807023  | 99877148  | lincRNA                                | 10,81 | 0         |
| ENSG00000258325 | ENSG00000258325 | 12 | 2796877   | 2812902   | antisense                              | 10,81 | 0         |
| ENSG00000226723 | ENSG00000226723 | 1  | 192246708 | 192247487 | processed_pseudogene                   | 10,81 | 0         |
| ENSG00000232907 | DLGAP4-AS1      | 20 | 36507702  | 36573391  | antisense                              | 10,81 | 0         |
| ENSG00000237015 | ENSG00000237015 | 22 | 29260889  | 29262037  | antisense                              | 10,80 | 0         |
| ENSG00000241717 | VWFP1           | 22 | 16690103  | 16704477  | transcribed_unprocess<br>ed_pseudogene | 10,80 | 0         |
| ENSG00000270083 | ENSG00000270083 | 22 | 42089630  | 42090028  | sense_intronic                         | 10,80 | 0         |
| ENSG00000233930 | KRTAP5-AS1      | 11 | 1571353   | 1599184   | antisense                              | 10,80 | 0         |
| ENSG00000255200 | ENSG00000255200 | 11 | 65174117  | 65176470  | transcribed_processed_<br>pseudogene   | 10,80 | 0         |
| ENSG00000251191 | LINC00589       | 8  | 29673922  | 29748109  | lincRNA                                | 10,80 | 0         |
| ENSG00000229153 | EPHA1-AS1       | 7  | 143407813 | 143523449 | antisense                              | 10,80 | 1,40E-02  |
| ENSG00000213608 | SLC25A14P1      | 4  | 83477524  | 83478424  | processed_pseudogene                   | 10,80 | 0,2161218 |
| ENSG00000229915 | ENSG00000229915 | 2  | 238427077 | 238427729 | antisense                              | 10,80 | 0         |
| ENSG00000272211 | ENSG00000272211 | 2  | 196151263 | 196154881 | antisense                              | 10,80 | 0         |
| ENSG00000233040 | FAM204BP        | 1  | 197746751 | 197747451 | processed_pseudogene                   | 10,80 | 0         |
| ENSG00000204706 | MAMDC2-AS1      | 9  | 70033921  | 70175888  | antisense                              | 10,79 | 3,30E-03  |
| ENSG00000225093 | RPL3P7          | 6  | 108004357 | 108005568 | processed_pseudogene                   | 10,79 | 0         |
| ENSG00000251458 | ENSG00000251458 | 5  | 176124210 | 176131461 | lincRNA                                | 10,79 | 0         |
| ENSG00000268218 | ENSG00000268218 | 16 | 89268104  | 89273044  | antisense                              | 10,73 | 0         |
| ENSG00000225544 | ENSG00000225544 | 22 | 21885282  | 21885673  | processed_pseudogene                   | 10,73 | 0         |
| ENSG00000227376 | FTH1P16         | 11 | 77734475  | 77735026  | processed_pseudogene                   | 10,73 | 0,1392851 |
| ENSG00000226342 | NMD3P1          | 7  | 63908966  | 63910453  | processed_pseudogene                   | 10,72 | 0         |
| ENSG00000236229 | VEZF1P1         | 3  | 193155456 | 193157208 | processed_pseudogene                   | 10,72 | 0         |
| ENSG00000232828 | ENSG00000232828 | X  | 48698963  | 48737163  | antisense                              | 10,72 | 0         |
| ENSG00000266373 | ENSG00000266373 | 18 | 3580169   | 3580754   | processed_pseudogene                   | 10,70 | 0         |
| ENSG00000257331 | ENSG00000257331 | 12 | 45063473  | 45065351  | processed_pseudogene                   | 10,70 | 0,2161218 |
| ENSG00000270578 | ENSG00000270578 | 11 | 95145437  | 95146004  | processed_pseudogene                   | 10,70 | 0         |
| ENSG00000277290 | ENSG00000277290 | 11 | 243099    | 243483    | processed_pseudogene                   | 10,70 | 1,40E-02  |
| ENSG00000172965 | MIR4435-2HG     | 2  | 111196350 | 111495100 | lincRNA                                | 10,70 | 0         |
| ENSG00000253406 | ENSG00000253406 | 5  | 149216523 | 149276805 | antisense                              | 10,69 | 0         |
| ENSG00000179859 | ENSG00000179859 | 17 | 7913324   | 7915953   | antisense                              | 10,66 | 0         |
| ENSG00000226017 | PRICKLE2-AS3    | 3  | 64187544  | 64200965  | antisense                              | 10,64 | 0         |
| ENSG00000224165 | DNAJC27-AS1     | 2  | 24971390  | 25039694  | antisense                              | 10,64 | 0         |
| ENSG00000258944 | ENSG00000258944 | 14 | 73272182  | 73274081  | antisense                              | 10,63 | 0         |
| ENSG00000233360 | ENSG00000233360 | 22 | 37641832  | 37658377  | antisense                              | 10,61 | 0         |
| ENSG00000214708 | ENSG00000214708 | 17 | 32141226  | 32143135  | antisense                              | 10,61 | 0         |

|                 |                 |    |           |           |                                    |       |           |
|-----------------|-----------------|----|-----------|-----------|------------------------------------|-------|-----------|
| ENSG00000213976 | ENSG00000213976 | 19 | 21382865  | 21387177  | unprocessed_pseudogene             | 10,61 | 0         |
| ENSG00000234880 | LINC00163       | 21 | 44989864  | 44994086  | lincRNA                            | 10,60 | 7,06E-02  |
| ENSG00000266743 | ENSG00000266743 | 18 | 76173304  | 76177738  | lincRNA                            | 10,60 | 0,2161218 |
| ENSG00000270580 | ENSG00000270580 | 16 | 15104723  | 15131601  | processed_transcript               | 10,60 | 0         |
| ENSG00000224116 | INHBA-AS1       | 7  | 41693916  | 41779388  | antisense                          | 10,60 | 0         |
| ENSG00000243410 | ENSG00000243410 | 3  | 64011964  | 64016246  | antisense                          | 10,60 | 0         |
| ENSG00000273174 | ENSG00000273174 | 3  | 129123439 | 129124003 | antisense                          | 10,60 | 0         |
| ENSG00000274642 | ENSG00000274642 | 1  | 120197085 | 120319680 | unprocessed_pseudogene             | 10,60 | 0         |
| ENSG00000214973 | CHCHD3P3        | 1  | 27200834  | 27201473  | processed_pseudogene               | 10,58 | 0         |
| ENSG00000261879 | ENSG00000261879 | 17 | 5192084   | 5248069   | antisense                          | 10,57 | 0         |
| ENSG00000259299 | ENSG00000259299 | 15 | 29233673  | 29235137  | processed_pseudogene               | 10,52 | 0         |
| ENSG00000257550 | ENSG00000257550 | 12 | 53513984  | 53517608  | antisense                          | 10,52 | 0         |
| ENSG00000223573 | TINCR           | 19 | 5558167   | 5568034   | lincRNA                            | 10,50 | 6,27E-03  |
| ENSG00000277806 | ENSG00000277806 | 19 | 43976815  | 43977448  | sense_intronic                     | 10,50 | 0         |
| ENSG00000259843 | ENSG00000259843 | 16 | 50046429  | 50066224  | antisense                          | 10,50 | 0         |
| ENSG00000240163 | ENSG00000240163 | 15 | 60390371  | 60390682  | processed_pseudogene               | 10,50 | 0         |
| ENSG00000260645 | ENSG00000260645 | 6  | 80466958  | 80469080  | lincRNA                            | 10,50 | 0         |
| ENSG00000227486 | ENSG00000227486 | X  | 55908123  | 56015173  | lincRNA                            | 10,50 | 0         |
| ENSG00000271933 | ENSG00000271933 | 10 | 84138420  | 84140582  | antisense                          | 10,50 | 0         |
| ENSG00000228395 | ENSG00000228395 | 9  | 128528901 | 128552410 | antisense                          | 10,49 | 0         |
| ENSG00000248508 | SRP14-AS1       | 15 | 40039311  | 40067290  | lincRNA                            | 10,49 | 0         |
| ENSG00000253341 | ENSG00000253341 | 8  | 74603244  | 74604244  | processed_pseudogene               | 10,48 | 0         |
| ENSG00000205583 | STAG3L1         | 7  | 75359194  | 75395383  | transcribed_unprocessed_pseudogene | 10,46 | 0         |
| ENSG00000268912 | ENSG00000268912 | 19 | 58428632  | 58431148  | lincRNA                            | 10,45 | 0         |
| ENSG00000215105 | TTC3P1          | X  | 75740831  | 75746911  | processed_pseudogene               | 10,45 | 0         |
| ENSG00000272293 | ENSG00000272293 | 8  | 450714    | 451343    | antisense                          | 10,44 | 0         |
| ENSG00000259238 | ENSG00000259238 | 15 | 59688517  | 59689418  | antisense                          | 10,41 | 0         |
| ENSG00000235890 | TSPEAR-AS1      | 21 | 44506807  | 44516575  | antisense                          | 10,40 | 0         |
| ENSG00000237807 | ENSG00000237807 | 8  | 53515171  | 53523931  | lincRNA                            | 10,40 | 0         |
| ENSG00000232713 | ENSG00000232713 | 2  | 60938204  | 60938604  | processed_pseudogene               | 10,40 | 0         |
| ENSG00000231228 | ENSG00000231228 | 5  | 180982273 | 180982611 | processed_pseudogene               | 10,36 | 0         |
| ENSG00000229759 | MRPS18AP1       | 3  | 48256350  | 48256938  | processed_pseudogene               | 10,36 | 0         |
| ENSG00000259905 | PWRN1           | 15 | 24493137  | 24652130  | lincRNA                            | 10,35 | 0         |
| ENSG00000177770 | CDKN2AIPNLP1    | 1  | 226493188 | 226493489 | processed_pseudogene               | 10,32 | 0         |
| ENSG00000251417 | ENSG00000251417 | 16 | 28802743  | 28817828  | lincRNA                            | 10,30 | 0         |
| ENSG00000177340 | ENSG00000177340 | 12 | 31324316  | 31325829  | antisense                          | 10,30 | 0         |
| ENSG00000236908 | ENSG00000236908 | 12 | 3318718   | 3325343   | lincRNA                            | 10,30 | 7,06E-02  |
| ENSG00000275180 | ENSG00000275180 | 12 | 62603909  | 62604399  | lincRNA                            | 10,30 | 1,40E-02  |
| ENSG00000230224 | PHBP9           | 10 | 100248271 | 100249095 | processed_pseudogene               | 10,30 | 0         |
| ENSG00000235475 | LINC01372       | 7  | 67335976  | 67340024  | lincRNA                            | 10,30 | 7,06E-02  |
| ENSG00000236708 | ENSG00000236708 | 7  | 3264032   | 3302452   | antisense                          | 10,29 | 0         |
| ENSG00000213225 | ENSG00000213225 | 2  | 130229379 | 130232106 | transcribed_processed_pseudogene   | 10,28 | 0         |
| ENSG00000269604 | ENSG00000269604 | 19 | 4791745   | 4795559   | antisense                          | 10,27 | 0         |
| ENSG00000226352 | ENSG00000226352 | 13 | 19674624  | 19675884  | antisense                          | 10,27 | 0         |
| ENSG00000230280 | HNRNPA1P59      | 1  | 202911812 | 202912729 | processed_pseudogene               | 10,27 | 0         |
| ENSG00000233728 | ENSG00000233728 | 1  | 37799720  | 37800879  | antisense                          | 10,27 | 0         |
| ENSG00000222043 | ENSG00000222043 | 2  | 177264359 | 177265515 | antisense                          | 10,23 | 0         |
| ENSG00000273055 | ENSG00000273055 | 7  | 107942116 | 107942740 | antisense                          | 10,23 | 0         |
| ENSG00000241990 | PRR34-AS1       | 22 | 46053705  | 46057210  | antisense                          | 10,20 | 0         |
| ENSG00000276073 | ENSG00000276073 | 20 | 33985617  | 33988989  | lincRNA                            | 10,20 | 0         |
| ENSG00000268743 | ENSG00000268743 | 19 | 16844025  | 16846473  | sense_intronic                     | 10,20 | 1,40E-02  |
| ENSG00000281468 | ENSG00000281468 | 19 | 27802838  | 27803472  | sense_intronic                     | 10,20 | 0         |
| ENSG00000270246 | ENSG00000270246 | 15 | 25041918  | 25042428  | sense_intronic                     | 10,20 | 0         |
| ENSG00000275552 | ENSG00000275552 | 14 | 22595808  | 22598946  | antisense                          | 10,20 | 0         |
| ENSG00000240859 | ENSG00000240859 | 7  | 149597    | 155465    | lincRNA                            | 10,20 | 0         |
| ENSG00000243230 | ENSG00000243230 | 7  | 129209775 | 129213545 | antisense                          | 10,20 | 1,40E-02  |
| ENSG00000196951 | SCOC-AS1        | 4  | 140283724 | 140373381 | antisense                          | 10,20 | 0         |

|                 |                 |    |           |           |                                    |       |           |
|-----------------|-----------------|----|-----------|-----------|------------------------------------|-------|-----------|
| ENSG00000273654 | ENSG00000273654 | 19 | 18022403  | 18032099  | transcribed_processed_pseudogene   | 10,19 | 0         |
| ENSG00000272689 | ENSG00000272689 | 22 | 30421206  | 30421536  | sense_intronic                     | 10,18 | 0         |
| ENSG00000227409 | ZMYM4-AS1       | 1  | 35358822  | 35366077  | antisense                          | 10,18 | 0         |
| ENSG00000230550 | ENSG00000230550 | 1  | 204141408 | 204143009 | antisense                          | 10,18 | 0         |
| ENSG00000240135 | PSMD12P         | 3  | 72876737  | 72878102  | unprocessed_pseudogene             | 10,18 | 0         |
| ENSG00000236257 | EI24P2          | 1  | 158454198 | 158455273 | processed_pseudogene               | 10,18 | 6,27E-03  |
| ENSG00000235174 | RPL39P3         | 6  | 73373108  | 73373263  | processed_pseudogene               | 10,17 | 0         |
| ENSG00000223473 | ENSG00000223473 | 7  | 66491049  | 66493566  | lincRNA                            | 10,17 | 0         |
| ENSG00000236432 | ENSG00000236432 | 2  | 227221052 | 227325201 | antisense                          | 10,17 | 0         |
| ENSG00000226054 | MEMO1P1         | 21 | 36130489  | 36131376  | processed_pseudogene               | 10,17 | 0         |
| ENSG00000241015 | TPM3P9          | 19 | 53431984  | 53444670  | transcribed_processed_pseudogene   | 10,16 | 0         |
| ENSG00000259330 | INAFM2          | 15 | 40325216  | 40326715  | antisense                          | 10,13 | 0         |
| ENSG00000270975 | MAGOH3P         | 14 | 68861762  | 68862525  | unprocessed_pseudogene             | 10,13 | 2,95E-02  |
| ENSG00000198106 | ENSG00000198106 | 16 | 29291220  | 29372110  | lincRNA                            | 10,10 | 0         |
| ENSG00000263013 | ENSG00000263013 | 16 | 10938886  | 10940044  | sense_intronic                     | 10,10 | 0         |
| ENSG00000277559 | ENSG00000277559 | 16 | 54290965  | 54292422  | lincRNA                            | 10,10 | 0         |
| ENSG00000237181 | ENSG00000237181 | 7  | 603185    | 608482    | antisense                          | 10,10 | 0         |
| ENSG00000146001 | PCDHB18P        | 5  | 141234333 | 141237529 | transcribed_unprocessed_pseudogene | 10,10 | 0         |
| ENSG00000249911 | LINC01265       | 5  | 38710367  | 38720273  | lincRNA                            | 10,10 | 1,40E-02  |
| ENSG00000255769 | GOLGA2P10       | 15 | 82472993  | 82513950  | transcribed_unprocessed_pseudogene | 10,09 | 0         |
| ENSG00000227484 | ENSG00000227484 | 22 | 50314631  | 50316008  | antisense                          | 10,08 | 0         |
| ENSG00000237773 | ENSG00000237773 | 7  | 17279834  | 17299357  | antisense                          | 10,07 | 0         |
| ENSG00000271851 | ENSG00000271851 | 17 | 9553323   | 9555696   | sense_intronic                     | 10,06 | 0         |
| ENSG00000269696 | ENSG00000269696 | 19 | 56545566  | 56567411  | antisense                          | 10,06 | 0         |
| ENSG00000233874 | ENSG00000233874 | X  | 109568478 | 109570289 | processed_pseudogene               | 10,03 | 0         |
| ENSG00000231794 | ENSG00000231794 | 7  | 135198401 | 135209837 | antisense                          | 10,03 | 0         |
| ENSG00000259877 | ENSG00000259877 | 16 | 89215211  | 89217653  | antisense                          | 10,03 | 0         |
| ENSG00000229107 | ABHD17AP4       | 22 | 20667836  | 20670984  | processed_pseudogene               | 10,00 | 0,2161218 |
| ENSG00000279278 | ENSG00000279278 | 22 | 22264601  | 22273020  | lincRNA                            | 10,00 | 0,2161218 |
| ENSG00000237259 | ENSG00000237259 | 20 | 18313765  | 18315111  | antisense                          | 10,00 | 0         |
| ENSG00000276449 | ENSG00000276449 | 19 | 57449689  | 57453011  | antisense                          | 10,00 | 0         |
| ENSG00000264608 | ENSG00000264608 | 17 | 28601827  | 28602284  | sense_intronic                     | 10,00 | 1,40E-02  |
| ENSG00000260884 | ENSG00000260884 | 16 | 74313337  | 74315634  | lincRNA                            | 10,00 | 0         |
| ENSG00000259523 | ENSG00000259523 | 15 | 29822631  | 29824081  | antisense                          | 10,00 | 0         |
| ENSG00000271417 | SNHG24          | 14 | 100967652 | 100987280 | lincRNA                            | 10,00 | 7,06E-02  |
| ENSG00000277156 | ENSG00000277156 | 14 | 19267115  | 19268164  | processed_pseudogene               | 10,00 | 0         |
| ENSG00000236583 | ENSG00000236583 | 8  | 99233048  | 99234459  | processed_pseudogene               | 10,00 | 0,2161218 |
| ENSG00000232415 | ENSG00000232415 | 7  | 74059576  | 74062284  | antisense                          | 10,00 | 0         |
| ENSG00000272087 | ENSG00000272087 | 3  | 158693120 | 158693768 | lincRNA                            | 10,00 | 0         |
| ENSG00000236255 | ENSG00000236255 | 2  | 117833937 | 117841658 | lincRNA                            | 10,00 | 0         |
| ENSG00000236682 | ENSG00000236682 | 2  | 127389130 | 127400580 | lincRNA                            | 10,00 | 0         |
| ENSG00000225492 | GBP1P1          | 1  | 89407679  | 89426243  | transcribed_unprocessed_pseudogene | 10,00 | 0         |
| ENSG00000229956 | ZRANB2-AS2      | 1  | 71081324  | 71489976  | processed_transcript               | 10,00 | 0         |
| ENSG00000259773 | ENSG00000259773 | 15 | 50746709  | 50749829  | antisense                          | 9,97  | 0         |
| ENSG00000255437 | ENSG00000255437 | 8  | 14022687  | 14023422  | processed_pseudogene               | 9,95  | 0         |
| ENSG00000260793 | ENSG00000260793 | 17 | 44221401  | 44223710  | antisense                          | 9,92  | 3,30E-03  |
| ENSG00000270964 | ENSG00000270964 | 15 | 67541072  | 67542604  | lincRNA                            | 9,91  | 0         |
| ENSG00000227407 | ENSG00000227407 | 19 | 54430654  | 54434698  | antisense                          | 9,90  | 1,40E-02  |
| ENSG00000255547 | RPA2P3          | 11 | 100336856 | 100337625 | processed_pseudogene               | 9,90  | 0         |
| ENSG00000260368 | ENSG00000260368 | 8  | 100913247 | 100914388 | sense_overlapping                  | 9,90  | 0         |
| ENSG00000237669 | HCG4P3          | 6  | 30006121  | 30007116  | unprocessed_pseudogene             | 9,90  | 0         |
| ENSG00000225986 | UBXN10-AS1      | 1  | 20184242  | 20186486  | antisense                          | 9,90  | 0         |
| ENSG00000272523 | LINC01023       | 5  | 108727825 | 108728260 | lincRNA                            | 9,87  | 0         |

|                 |                 |    |           |           |                                  |      |           |
|-----------------|-----------------|----|-----------|-----------|----------------------------------|------|-----------|
| ENSG00000266145 | RHOT1P1         | 18 | 14222008  | 14222331  | processed_pseudogene             | 9,84 | 4,86E-02  |
| ENSG00000259099 | ENSG00000259099 | 12 | 56380361  | 56382711  | processed_pseudogene             | 9,83 | 1,95E-02  |
| ENSG00000263535 | AK4P1           | 17 | 31345521  | 31346187  | processed_pseudogene             | 9,83 | 0         |
| ENSG00000258017 | ENSG00000258017 | 12 | 49127782  | 49147869  | antisense                        | 9,83 | 0         |
| ENSG00000230707 | ENSG00000230707 | X  | 140091743 | 140092561 | processed_pseudogene             | 9,83 | 0         |
| ENSG00000249215 | ENSG00000249215 | 5  | 139494256 | 139496116 | processed_pseudogene             | 9,82 | 0         |
| ENSG00000260075 | NSFP1           | 17 | 46372855  | 46487141  | unprocessed_pseudogene           | 9,82 | 0         |
| ENSG00000250073 | ENSG00000250073 | 11 | 124759129 | 124765936 | antisense                        | 9,80 | 1,40E-02  |
| ENSG00000224934 | ENSG00000224934 | 10 | 99431191  | 99438117  | lincRNA                          | 9,80 | 1,40E-02  |
| ENSG00000228010 | ENSG00000228010 | 7  | 6663974   | 6708901   | antisense                        | 9,80 | 0         |
| ENSG00000218713 | ENSG00000218713 | 6  | 53206598  | 53208697  | processed_pseudogene             | 9,80 | 1,40E-02  |
| ENSG00000227214 | HCG15           | 6  | 28986203  | 28987484  | antisense                        | 9,80 | 0         |
| ENSG00000250579 | ENSG00000250579 | 5  | 5132780   | 5140054   | antisense                        | 9,80 | 7,06E-02  |
| ENSG00000225808 | DNAJC19P5       | 2  | 177229191 | 177229506 | processed_pseudogene             | 9,80 | 0         |
| ENSG00000225953 | SATB2-AS1       | 2  | 199457700 | 199476935 | antisense                        | 9,80 | 0         |
| ENSG00000230207 | RPL4P5          | 9  | 7477045   | 7478320   | processed_pseudogene             | 9,78 | 0         |
| ENSG00000281357 | ARRDC3-AS1      | 5  | 91380349  | 91439085  | lincRNA                          | 9,77 | 0         |
| ENSG00000213036 | ENSG00000213036 | 1  | 214482813 | 214483387 | processed_pseudogene             | 9,76 | 0         |
| ENSG00000261243 | ENSG00000261243 | 16 | 84495599  | 84497495  | antisense                        | 9,76 | 0         |
| ENSG00000259955 | ENSG00000259955 | 16 | 25238318  | 25239287  | antisense                        | 9,73 | 0         |
| ENSG00000218857 | ENSG00000218857 | 6  | 131184325 | 131185486 | processed_pseudogene             | 9,72 | 0         |
| ENSG00000256967 | ENSG00000256967 | 12 | 7129079   | 7131198   | antisense                        | 9,70 | 0         |
| ENSG00000230736 | ENSG00000230736 | 22 | 32376664  | 32384343  | lincRNA                          | 9,70 | 0         |
| ENSG00000231711 | LINC00899       | 22 | 46039907  | 46044853  | processed_transcript             | 9,70 | 0         |
| ENSG00000268734 | ENSG00000268734 | 19 | 54890673  | 54891420  | lincRNA                          | 9,70 | 0         |
| ENSG00000269546 | CLIC4P2         | 19 | 6562123   | 6563848   | processed_pseudogene             | 9,70 | 0         |
| ENSG00000267745 | ENSG00000267745 | 17 | 35406684  | 35409768  | processed_transcript             | 9,70 | 0         |
| ENSG00000250616 | ENSG00000250616 | 16 | 30096430  | 30104116  | antisense                        | 9,70 | 0         |
| ENSG00000236242 | MYO16-AS1       | 13 | 109163902 | 109201483 | antisense                        | 9,70 | 7,06E-02  |
| ENSG00000257824 | ENSG00000257824 | 12 | 54543111  | 54544105  | antisense                        | 9,70 | 1,40E-02  |
| ENSG00000273008 | ENSG00000273008 | 10 | 43136824  | 43138334  | lincRNA                          | 9,70 | 0         |
| ENSG00000253930 | ENSG00000253930 | 8  | 23189279  | 23190675  | antisense                        | 9,70 | 0         |
| ENSG00000245205 | EEF1A1P4        | 12 | 19456244  | 19457648  | processed_pseudogene             | 9,69 | 9,18E-02  |
| ENSG00000233058 | LINC00884       | 3  | 194487454 | 194518279 | antisense                        | 9,69 | 0         |
| ENSG00000235257 | ITGA9-AS1       | 3  | 37745432  | 37861780  | processed_transcript             | 9,69 | 0         |
| ENSG00000172250 | SERHL           | 22 | 42500579  | 42512560  | processed_transcript             | 9,69 | 0         |
| ENSG00000238082 | ENSG00000238082 | 2  | 178454716 | 178455428 | processed_pseudogene             | 9,68 | 0         |
| ENSG00000232260 | BTF3L4P1        | 21 | 17518526  | 17518993  | processed_pseudogene             | 9,67 | 0         |
| ENSG00000250615 | ENSG00000250615 | 5  | 77073881  | 77074520  | antisense                        | 9,66 | 0         |
| ENSG00000276791 | ENSG00000276791 | 16 | 2777319   | 2780568   | lincRNA                          | 9,65 | 0         |
| ENSG00000240429 | LRRFIP1P1       | 3  | 179259028 | 179261273 | processed_pseudogene             | 9,62 | 0         |
| ENSG00000241506 | PSMC1P1         | 3  | 68635705  | 68637024  | processed_pseudogene             | 9,62 | 0         |
| ENSG00000256458 | ENSG00000256458 | 2  | 203328459 | 203329226 | antisense                        | 9,62 | 0         |
| ENSG00000213303 | ENSG00000213303 | 19 | 11523436  | 11523831  | processed_pseudogene             | 9,60 | 0,2161218 |
| ENSG00000269535 | ENSG00000269535 | 19 | 52300693  | 52345229  | antisense                        | 9,60 | 1,40E-02  |
| ENSG00000282458 | WASH5P          | 19 | 60951     | 71626     | transcribed_processed_pseudogene | 9,60 | 0         |
| ENSG00000262663 | ENSG00000262663 | 17 | 82918282  | 82918785  | lincRNA                          | 9,60 | 0         |
| ENSG00000229670 | PKP4P1          | 2  | 209178966 | 209181123 | unprocessed_pseudogene           | 9,59 | 0         |
| ENSG00000225205 | ENSG00000225205 | 2  | 172480840 | 172556596 | antisense                        | 9,59 | 0         |
| ENSG00000277959 | ENSG00000277959 | 10 | 131971202 | 131971533 | antisense                        | 9,58 | 0         |
| ENSG00000257303 | ENSG00000257303 | 12 | 56300142  | 56314808  | antisense                        | 9,58 | 0         |
| ENSG00000259163 | ENSG00000259163 | 14 | 90642638  | 90648894  | antisense                        | 9,56 | 0         |
| ENSG00000261976 | ENSG00000261976 | 17 | 50840057  | 50841626  | antisense                        | 9,54 | 0         |
| ENSG00000223528 | ENSG00000223528 | 10 | 126988095 | 127026507 | antisense                        | 9,53 | 0         |
| ENSG00000272153 | ENSG00000272153 | 1  | 3785008   | 3785538   | antisense                        | 9,53 | 0         |
| ENSG00000233578 | EIF4EP1         | 20 | 5548840   | 5549481   | processed_pseudogene             | 9,50 | 1,40E-02  |
| ENSG00000229980 | TOB1-AS1        | 17 | 50866679  | 50909737  | processed_transcript             | 9,50 | 0         |
| ENSG00000261868 | MFSD1P1         | 17 | 4301372   | 4302698   | processed_pseudogene             | 9,50 | 0,2161218 |

|                 |                 |    |           |           |                                    |      |          |
|-----------------|-----------------|----|-----------|-----------|------------------------------------|------|----------|
| ENSG00000262905 | ENSG00000262905 | 17 | 552566    | 553417    | antisense                          | 9,50 | 0        |
| ENSG00000255885 | ENSG00000255885 | 12 | 7870852   | 7871370   | processed_pseudogene               | 9,50 | 0        |
| ENSG00000264204 | AGAP7P          | 10 | 46109621  | 46131358  | unprocessed_pseudogene             | 9,50 | 0        |
| ENSG00000237339 | LINC01502       | 9  | 135574935 | 135587112 | lincRNA                            | 9,50 | 0        |
| ENSG00000281189 | GHET1           | 7  | 148987527 | 148989432 | lincRNA                            | 9,50 | 0        |
| ENSG00000224666 | ENSG00000224666 | 6  | 36386831  | 36393462  | antisense                          | 9,50 | 7,06E-02 |
| ENSG00000232352 | SEMA3B-AS1      | 3  | 50266641  | 50267371  | antisense                          | 9,50 | 0        |
| ENSG00000270096 | ENSG00000270096 | 3  | 169794962 | 169796213 | antisense                          | 9,50 | 0        |
| ENSG00000226553 | ENSG00000226553 | 2  | 187001876 | 187003377 | processed_pseudogene               | 9,50 | 0        |
| ENSG00000259684 | ENSG00000259684 | 15 | 50557601  | 50560500  | antisense                          | 9,46 | 0        |
| ENSG00000258794 | DUX4L27         | 12 | 34208415  | 34209675  | processed_pseudogene               | 9,45 | 3,30E-03 |
| ENSG00000233203 | ENSG00000233203 | 1  | 54887563  | 54888850  | antisense                          | 9,45 | 0        |
| ENSG00000233029 | ENSG00000233029 | 1  | 121090289 | 121097655 | antisense                          | 9,42 | 0        |
| ENSG00000198416 | ZNF658B         | 9  | 39443815  | 39508885  | transcribed_unprocessed_pseudogene | 9,41 | 0        |
| ENSG00000229083 | PSMA6P2         | X  | 12825840  | 12826833  | processed_pseudogene               | 9,40 | 1,40E-02 |
| ENSG00000269901 | ENSG00000269901 | 16 | 87362536  | 87367476  | antisense                          | 9,40 | 0        |
| ENSG00000257596 | ENSG00000257596 | 12 | 54262615  | 54279063  | antisense                          | 9,40 | 1,40E-02 |
| ENSG00000254941 | ENSG00000254941 | 11 | 124807822 | 124808269 | processed_pseudogene               | 9,40 | 0        |
| ENSG00000228339 | AMD1P1          | 10 | 20350049  | 20351100  | processed_pseudogene               | 9,40 | 7,06E-02 |
| ENSG00000253688 | ENSG00000253688 | 8  | 48552015  | 48556441  | lincRNA                            | 9,40 | 0        |
| ENSG00000146722 | ENSG00000146722 | 7  | 75391955  | 75395434  | transcribed_unprocessed_pseudogene | 9,40 | 0        |
| ENSG00000260091 | ENSG00000260091 | 4  | 119409333 | 119410233 | lincRNA                            | 9,40 | 0        |
| ENSG00000272927 | ENSG00000272927 | 4  | 661209    | 661945    | antisense                          | 9,40 | 0        |
| ENSG00000272967 | ENSG00000272967 | 3  | 119579212 | 119579650 | antisense                          | 9,40 | 0        |
| ENSG00000236155 | ENSG00000236155 | 1  | 26209741  | 26229840  | transcribed_unprocessed_pseudogene | 9,40 | 0        |
| ENSG00000232611 | ENSG00000232611 | X  | 136840931 | 136847797 | lincRNA                            | 9,40 | 0        |
| ENSG00000225259 | ST13P6          | 8  | 133408006 | 133409107 | processed_pseudogene               | 9,39 | 0        |
| ENSG00000237970 | TMEM161BP1      | 10 | 37337415  | 37338871  | processed_pseudogene               | 9,38 | 0        |
| ENSG00000238280 | ENSG00000238280 | 10 | 62793562  | 62805887  | antisense                          | 9,38 | 0        |
| ENSG00000249855 | EEF1A1P19       | 5  | 43495073  | 43496454  | processed_pseudogene               | 9,35 | 0        |
| ENSG00000267698 | ENSG00000267698 | 19 | 36014508  | 36045972  | antisense                          | 9,33 | 0        |
| ENSG00000272744 | ENSG00000272744 | 4  | 183516894 | 183517527 | lincRNA                            | 9,33 | 2,95E-02 |
| ENSG00000259918 | NDUFA5P11       | 16 | 47598654  | 47598996  | processed_pseudogene               | 9,31 | 0        |
| ENSG00000267100 | ILF3-AS1        | 19 | 10651862  | 10653844  | lincRNA                            | 9,30 | 0        |
| ENSG00000276727 | ENSG00000276727 | 12 | 57229498  | 57230198  | antisense                          | 9,30 | 0        |
| ENSG00000268038 | ENSG00000268038 | 19 | 22615557  | 22623971  | lincRNA                            | 9,30 | 0        |
| ENSG00000205890 | ENSG00000205890 | 16 | 3032481   | 3039133   | antisense                          | 9,30 | 7,06E-02 |
| ENSG00000223518 | CSNK1A1P1       | 15 | 36798596  | 36818459  | transcribed_processed_pseudogene   | 9,30 | 1,40E-02 |
| ENSG00000259732 | ENSG00000259732 | 15 | 59121034  | 59133250  | sense_overlapping                  | 9,30 | 0        |
| ENSG00000255142 | ENSG00000255142 | 11 | 781645    | 782105    | lincRNA                            | 9,30 | 0        |
| ENSG00000255158 | ENSG00000255158 | 11 | 665910    | 678391    | antisense                          | 9,30 | 0        |
| ENSG00000220739 | ENSG00000220739 | 6  | 144708106 | 144708497 | processed_pseudogene               | 9,30 | 1,40E-02 |
| ENSG00000249363 | ENSG00000249363 | 5  | 145728360 | 145729349 | processed_pseudogene               | 9,30 | 0        |
| ENSG00000272156 | ENSG00000272156 | 2  | 54082554  | 54085066  | lincRNA                            | 9,30 | 0        |
| ENSG00000174912 | METTL15P1       | 3  | 156713884 | 156714928 | processed_pseudogene               | 9,30 | 0        |
| ENSG00000232640 | ENSG00000232640 | 6  | 169725091 | 169725854 | antisense                          | 9,25 | 0        |
| ENSG00000275223 | ENSG00000275223 | 20 | 33655701  | 33656423  | lincRNA                            | 9,25 | 0        |
| ENSG00000266473 | ENSG00000266473 | 17 | 67244837  | 67245806  | antisense                          | 9,25 | 0        |
| ENSG00000205534 | SMG1P2          | 16 | 29527568  | 29594966  | unprocessed_pseudogene             | 9,25 | 0        |
| ENSG00000249014 | HMG2P4          | 5  | 76242024  | 76242404  | processed_pseudogene               | 9,24 | 0        |
| ENSG00000262899 | ENSG00000262899 | 16 | 3307573   | 3308393   | antisense                          | 9,23 | 0        |
| ENSG00000275055 | ENSG00000275055 | 19 | 52049007  | 52049754  | antisense                          | 9,21 | 0        |
| ENSG00000254419 | ENSG00000254419 | 20 | 58710795  | 58711633  | sense_intronic                     | 9,20 | 0        |
| ENSG00000269938 | ENSG00000269938 | 12 | 123968023 | 123968579 | sense_intronic                     | 9,20 | 0        |
| ENSG00000253358 | ENSG00000253358 | 8  | 91016588  | 91018655  | antisense                          | 9,20 | 0        |

|                 |                 |    |           |           |                                    |      |           |
|-----------------|-----------------|----|-----------|-----------|------------------------------------|------|-----------|
| ENSG00000228960 | OR2A9P          | 7  | 144294480 | 144300934 | transcribed_unprocessed_pseudogene | 9,20 | 0         |
| ENSG00000271789 | ENSG00000271789 | 6  | 111297126 | 111298510 | lincRNA                            | 9,20 | 1,40E-02  |
| ENSG00000242858 | ENSG00000242858 | 5  | 83746388  | 83746989  | processed_pseudogene               | 9,20 | 0         |
| ENSG00000249637 | ENSG00000249637 | 5  | 140370891 | 140401367 | antisense                          | 9,20 | 0         |
| ENSG00000230069 | LRR37A15P       | 4  | 102727274 | 102730721 | processed_pseudogene               | 9,20 | 0         |
| ENSG00000240137 | ERICH6-AS1      | 3  | 150703564 | 150720146 | antisense                          | 9,20 | 0         |
| ENSG00000271992 | ENSG00000271992 | 1  | 70445071  | 70445536  | lincRNA                            | 9,20 | 7,06E-02  |
| ENSG00000273443 | ENSG00000273443 | 1  | 1062208   | 1063288   | lincRNA                            | 9,20 | 7,06E-02  |
| ENSG00000228906 | ENSG00000228906 | X  | 73948973  | 73949558  | lincRNA                            | 9,20 | 0         |
| ENSG00000233895 | ENSG00000233895 | 20 | 19757708  | 19809675  | lincRNA                            | 9,19 | 0         |
| ENSG00000255351 | ENSG00000255351 | 11 | 11352426  | 11353307  | antisense                          | 9,16 | 0         |
| ENSG00000186056 | MATN1-AS1       | 1  | 30718504  | 30726827  | antisense                          | 9,14 | 0         |
| ENSG00000241472 | PTPRG-AS1       | 3  | 62260865  | 62369330  | processed_transcript               | 9,13 | 0         |
| ENSG00000235313 | HM13-IT1        | 20 | 31563166  | 31564076  | sense_intronic                     | 9,10 | 0         |
| ENSG00000260510 | ENSG00000260510 | 16 | 20743663  | 20766620  | antisense                          | 9,10 | 0         |
| ENSG00000258768 | ENSG00000258768 | 14 | 20260480  | 20264308  | lincRNA                            | 9,10 | 0         |
| ENSG00000256185 | ENSG00000256185 | 12 | 26335864  | 26336950  | 3prime_overlapping_ncrna           | 9,10 | 0         |
| ENSG00000232600 | TONSL-AS1       | 8  | 144437675 | 144439971 | antisense                          | 9,10 | 0         |
| ENSG00000242607 | RPS3AP34        | 8  | 12570350  | 12571130  | processed_pseudogene               | 9,10 | 0         |
| ENSG00000278275 | ENSG00000278275 | 8  | 128010188 | 128010428 | processed_pseudogene               | 9,10 | 0         |
| ENSG00000250934 | ENSG00000250934 | 3  | 126266796 | 126291279 | lincRNA                            | 9,10 | 0         |
| ENSG00000281406 | BLACAT1         | 1  | 205434886 | 205437879 | lincRNA                            | 9,10 | 0         |
| ENSG00000236337 | FMR1-IT1        | X  | 147946941 | 147947583 | sense_intronic                     | 9,10 | 0         |
| ENSG00000178082 | TWF1P1          | 17 | 29203426  | 29204474  | processed_pseudogene               | 9,10 | 0         |
| ENSG00000260774 | ENSG00000260774 | 5  | 213898    | 217279    | processed_transcript               | 9,09 | 0         |
| ENSG00000232934 | ENSG00000232934 | 10 | 112395813 | 112425589 | antisense                          | 9,06 | 0         |
| ENSG00000253541 | SEPT10P1        | 8  | 56476826  | 56477987  | processed_pseudogene               | 9,05 | 0         |
| ENSG00000235411 | ENSG00000235411 | 2  | 20239892  | 20241046  | processed_pseudogene               | 9,03 | 0         |
| ENSG00000267092 | ENSG00000267092 | 19 | 1508375   | 1508963   | antisense                          | 9,00 | 3,30E-03  |
| ENSG00000267898 | ENSG00000267898 | 19 | 48963975  | 48965158  | lincRNA                            | 9,00 | 1,40E-02  |
| ENSG00000269792 | ENSG00000269792 | 19 | 39532412  | 39534422  | antisense                          | 9,00 | 0         |
| ENSG00000267404 | ENSG00000267404 | 18 | 36273574  | 36274599  | processed_pseudogene               | 9,00 | 0         |
| ENSG00000261499 | ENSG00000261499 | 17 | 36274191  | 36320547  | unprocessed_pseudogene             | 9,00 | 0         |
| ENSG00000232224 | LINC00202-1     | 10 | 26931206  | 26942001  | lincRNA                            | 9,00 | 0         |
| ENSG00000119440 | LCN1P1          | 9  | 133224905 | 133228591 | unprocessed_pseudogene             | 9,00 | 7,06E-02  |
| ENSG00000215022 | ENSG00000215022 | 6  | 13264861  | 13295586  | antisense                          | 9,00 | 0         |
| ENSG00000220635 | KRASP1          | 6  | 54770583  | 54771134  | processed_pseudogene               | 9,00 | 0         |
| ENSG00000260296 | ENSG00000260296 | 4  | 40166675  | 40167831  | sense_overlapping                  | 9,00 | 0,3318209 |
| ENSG00000239799 | ITIH4-AS1       | 3  | 52823935  | 52825314  | antisense                          | 9,00 | 0         |
| ENSG00000243849 | CFAP44-AS1      | 3  | 113403991 | 113433992 | antisense                          | 9,00 | 0         |
| ENSG00000227033 | ENSG00000227033 | 2  | 231978488 | 232015720 | antisense                          | 9,00 | 0         |
| ENSG00000271947 | ENSG00000271947 | 2  | 6905724   | 6906301   | lincRNA                            | 9,00 | 1,40E-02  |
| ENSG00000274010 | ENSG00000274010 | 2  | 127840606 | 127841763 | processed_pseudogene               | 9,00 | 0,2161218 |
| ENSG00000226085 | UQCRFS1P1       | 22 | 39875289  | 39876108  | processed_pseudogene               | 8,97 | 0         |
| ENSG00000228051 | ENSG00000228051 | X  | 80560146  | 80562054  | processed_pseudogene               | 8,96 | 0,1392851 |
| ENSG00000260853 | ENSG00000260853 | 16 | 28956687  | 28966883  | antisense                          | 8,96 | 0         |
| ENSG00000270696 | ENSG00000270696 | 2  | 75660462  | 75662208  | antisense                          | 8,95 | 0         |
| ENSG00000232549 | SRD5A1P1        | X  | 139446891 | 139447676 | processed_pseudogene               | 8,93 | 0         |
| ENSG00000268798 | ENSG00000268798 | 19 | 1440839   | 1441938   | lincRNA                            | 8,91 | 0         |
| ENSG00000260747 | ENSG00000260747 | 18 | 68277802  | 68278243  | processed_pseudogene               | 8,90 | 0         |
| ENSG00000232775 | BMS1P22         | 22 | 15805263  | 15820884  | transcribed_unprocessed_pseudogene | 8,90 | 0         |
| ENSG00000267707 | ENSG00000267707 | 18 | 37243776  | 37247506  | antisense                          | 8,90 | 7,06E-02  |
| ENSG00000266830 | ENSG00000266830 | 17 | 28246454  | 28248006  | lincRNA                            | 8,90 | 0         |
| ENSG00000258907 | ENSG00000258907 | 12 | 55654558  | 55655168  | processed_pseudogene               | 8,90 | 7,06E-02  |
| ENSG00000269997 | ENSG00000269997 | 12 | 123966077 | 123966629 | sense_intronic                     | 8,90 | 0         |
| ENSG00000185904 | LINC00839       | 10 | 42475543  | 42495336  | lincRNA                            | 8,90 | 7,06E-02  |

|                 |                 |    |           |           |                                    |      |           |
|-----------------|-----------------|----|-----------|-----------|------------------------------------|------|-----------|
| ENSG00000272764 | ENSG00000272764 | 10 | 5813985   | 5814441   | lincRNA                            | 8,90 | 0         |
| ENSG00000254088 | SLC2A3P4        | 8  | 86503591  | 86505061  | processed_pseudogene               | 8,90 | 0         |
| ENSG00000215492 | HNRNPA1P7       | 18 | 32412214  | 32413176  | processed_pseudogene               | 8,88 | 4,86E-02  |
| ENSG00000258282 | BTF3P2          | 14 | 28673241  | 28673727  | processed_pseudogene               | 8,88 | 2,95E-02  |
| ENSG00000236088 | COX10-AS1       | 17 | 13756478  | 14069495  | processed_transcript               | 8,87 | 0         |
| ENSG00000186704 | DTX2P1          | 7  | 76978617  | 77004308  | transcribed_unprocessed_pseudogene | 8,87 | 0         |
| ENSG00000238018 | ENSG00000238018 | 2  | 54661011  | 54680045  | antisense                          | 8,86 | 0         |
| ENSG00000255139 | ENSG00000255139 | 11 | 59616429  | 59639861  | antisense                          | 8,85 | 0         |
| ENSG00000229586 | TNPO1P3         | 17 | 20481330  | 20483991  | processed_pseudogene               | 8,85 | 0         |
| ENSG00000258428 | ENSG00000258428 | 14 | 56633244  | 56648658  | antisense                          | 8,83 | 0         |
| ENSG00000278367 | ENSG00000278367 | 20 | 35174355  | 35174919  | antisense                          | 8,83 | 0         |
| ENSG00000226964 | RHEBP2          | 10 | 47706203  | 47706802  | processed_pseudogene               | 8,82 | 0         |
| ENSG00000273017 | ENSG00000273017 | 21 | 29359002  | 29359453  | sense_intronic                     | 8,80 | 7,06E-02  |
| ENSG00000264736 | BDP1P           | 18 | 77435253  | 77437242  | processed_pseudogene               | 8,80 | 1,40E-02  |
| ENSG00000236194 | ENSG00000236194 | 17 | 42270517  | 42272683  | sense_intronic                     | 8,80 | 0         |
| ENSG00000260306 | ENSG00000260306 | 16 | 21794095  | 21795759  | lincRNA                            | 8,80 | 0         |
| ENSG00000259475 | ENSG00000259475 | 15 | 98954149  | 99105824  | antisense                          | 8,80 | 0         |
| ENSG00000259676 | ENSG00000259676 | 15 | 88797413  | 88798734  | lincRNA                            | 8,80 | 0         |
| ENSG00000243250 | RPS6P16         | 11 | 112235371 | 112236025 | processed_pseudogene               | 8,80 | 0         |
| ENSG00000256091 | MTRF1LP1        | 11 | 113711720 | 113712398 | processed_pseudogene               | 8,80 | 0         |
| ENSG00000264299 | ENSG00000264299 | 11 | 125957900 | 125958652 | antisense                          | 8,80 | 0         |
| ENSG00000271830 | ENSG00000271830 | 8  | 103481266 | 103481619 | lincRNA                            | 8,80 | 1,40E-02  |
| ENSG00000226824 | ENSG00000226824 | 7  | 66654538  | 66669855  | sense_intronic                     | 8,80 | 0         |
| ENSG00000213386 | ENSG00000213386 | 5  | 172762521 | 172763258 | processed_pseudogene               | 8,80 | 0         |
| ENSG00000250725 | ENSG00000250725 | 4  | 165664350 | 165665671 | processed_pseudogene               | 8,80 | 0         |
| ENSG00000224232 | ENSG00000224232 | 2  | 241478316 | 241478993 | processed_pseudogene               | 8,80 | 1,40E-02  |
| ENSG00000261773 | ENSG00000261773 | X  | 154517840 | 154518631 | sense_overlapping                  | 8,80 | 7,06E-02  |
| ENSG00000259287 | ENSG00000259287 | 15 | 33858602  | 33864825  | antisense                          | 8,80 | 0         |
| ENSG00000271828 | ENSG00000271828 | 5  | 56927874  | 56929573  | antisense                          | 8,79 | 0         |
| ENSG00000253837 | ENSG00000253837 | 8  | 23336171  | 23366125  | processed_transcript               | 8,79 | 0         |
| ENSG00000271869 | ENSG00000271869 | 8  | 30155830  | 30156232  | lincRNA                            | 8,77 | 0,2161218 |
| ENSG00000248668 | OXCT1-AS1       | 5  | 41870030  | 41872241  | processed_transcript               | 8,76 | 0         |
| ENSG00000234928 | ENSG00000234928 | 22 | 23433564  | 23435071  | lincRNA                            | 8,76 | 0         |
| ENSG00000233967 | ENSG00000233967 | 6  | 80443344  | 80465927  | lincRNA                            | 8,76 | 0         |
| ENSG00000272812 | ENSG00000272812 | 8  | 233119    | 233692    | sense_intronic                     | 8,75 | 0         |
| ENSG00000254502 | ENSG00000254502 | 11 | 86195132  | 86196266  | processed_pseudogene               | 8,74 | 0         |
| ENSG00000182347 | PDSS1P1         | 9  | 5084999   | 5086112   | processed_pseudogene               | 8,73 | 0,0358681 |
| ENSG00000236814 | ENSG00000236814 | 8  | 56050038  | 56051207  | processed_pseudogene               | 8,71 | 0         |
| ENSG00000237977 | EIF4HP2         | 22 | 30902219  | 30902781  | processed_pseudogene               | 8,71 | 3,30E-03  |
| ENSG00000270878 | ENSG00000270878 | 14 | 63594031  | 63595291  | processed_pseudogene               | 8,71 | 0         |
| ENSG00000269559 | ENSG00000269559 | 4  | 74156511  | 74158373  | antisense                          | 8,70 | 0         |
| ENSG00000274717 | ENSG00000274717 | 22 | 42791814  | 42794313  | processed_pseudogene               | 8,70 | 0         |
| ENSG00000266378 | ENSG00000266378 | 17 | 14327335  | 14329474  | lincRNA                            | 8,70 | 7,06E-02  |
| ENSG00000247809 | NR2F2-AS1       | 15 | 96110040  | 96327361  | antisense                          | 8,70 | 0         |
| ENSG00000258303 | ENSG00000258303 | 12 | 93836167  | 93838038  | sense_intronic                     | 8,70 | 0,2161218 |
| ENSG00000273568 | ENSG00000273568 | 12 | 131934642 | 131934928 | sense_intronic                     | 8,70 | 0         |
| ENSG00000228828 | ENSG00000228828 | 10 | 37818606  | 37820982  | processed_pseudogene               | 8,70 | 7,06E-02  |
| ENSG00000253523 | ENSG00000253523 | 8  | 58031334  | 58032682  | lincRNA                            | 8,70 | 0         |
| ENSG00000234484 | ENSG00000234484 | 6  | 132752675 | 132753951 | antisense                          | 8,70 | 1,40E-02  |
| ENSG00000250986 | ENSG00000250986 | 4  | 3758748   | 3763390   | lincRNA                            | 8,70 | 0         |
| ENSG00000203855 | HSD3BP4         | 1  | 119564066 | 119572067 | unprocessed_pseudogene             | 8,70 | 7,06E-02  |
| ENSG00000274895 | ENSG00000274895 | 1  | 213983793 | 213986419 | antisense                          | 8,70 | 7,06E-02  |
| ENSG00000261556 | SMG1P7          | 16 | 70219574  | 70245616  | transcribed_unprocessed_pseudogene | 8,66 | 0         |
| ENSG00000224843 | LINC00240       | 6  | 26956992  | 27023924  | lincRNA                            | 8,64 | 3,30E-03  |
| ENSG00000233432 | ENSG00000233432 | 1  | 121502344 | 121503891 | processed_pseudogene               | 8,64 | 0         |
| ENSG00000233635 | ENSG00000233635 | 17 | 63193930  | 63339053  | antisense                          | 8,61 | 0         |
| ENSG00000273188 | ENSG00000273188 | 22 | 50191724  | 50192402  | antisense                          | 8,60 | 0         |
| ENSG00000231125 | ENSG00000231125 | 21 | 29058073  | 29060095  | sense_intronic                     | 8,60 | 1,40E-02  |

|                 |                 |    |           |           |                                    |      |           |
|-----------------|-----------------|----|-----------|-----------|------------------------------------|------|-----------|
| ENSG00000259000 | DOCK11P1        | 14 | 44860316  | 44866247  | processed_pseudogene               | 8,60 | 0         |
| ENSG00000228661 | ENSG00000228661 | 11 | 3854318   | 3855509   | antisense                          | 8,60 | 0         |
| ENSG00000255342 | ENSG00000255342 | 11 | 123135923 | 123136376 | processed_pseudogene               | 8,60 | 7,06E-02  |
| ENSG00000164556 | FAM183BP        | 7  | 38685346  | 38687037  | processed_pseudogene               | 8,60 | 0,2161218 |
| ENSG00000250343 | ENSG00000250343 | 5  | 147180204 | 147234859 | antisense                          | 8,60 | 0         |
| ENSG00000280029 | ENSG00000280029 | 5  | 141136683 | 141245380 | antisense                          | 8,60 | 0         |
| ENSG00000242337 | TFP1            | 3  | 133661998 | 133754576 | transcribed_unprocessed_pseudogene | 8,60 | 0         |
| ENSG00000240244 | GAPDHP33        | 1  | 119596167 | 119597179 | processed_pseudogene               | 8,60 | 1,40E-02  |
| ENSG00000272668 | ENSG00000272668 | 1  | 159866954 | 159867685 | antisense                          | 8,60 | 7,06E-02  |
| ENSG00000214654 | ENSG00000214654 | 9  | 120793551 | 120799570 | transcribed_processed_pseudogene   | 8,59 | 0         |
| ENSG00000273523 | ENSG00000273523 | 13 | 52128891  | 52132723  | antisense                          | 8,58 | 6,27E-03  |
| ENSG00000231177 | LINC00852       | 3  | 10284419  | 10285746  | antisense                          | 8,56 | 0         |
| ENSG00000260389 | WBP11P1         | 18 | 32511663  | 32514634  | transcribed_processed_pseudogene   | 8,56 | 0         |
| ENSG00000248015 | ENSG00000248015 | 19 | 1392170   | 1396467   | antisense                          | 8,56 | 0         |
| ENSG00000225578 | NCBP2-AS1       | 3  | 196939877 | 196942534 | antisense                          | 8,54 | 0         |
| ENSG00000225484 | NUTM2B-AS1      | 10 | 79663088  | 79826594  | antisense                          | 8,53 | 0         |
| ENSG00000267096 | ENSG00000267096 | 19 | 55670632  | 55672069  | sense_intronic                     | 8,50 | 0         |
| ENSG00000277744 | ENSG00000277744 | 19 | 41373971  | 41374419  | sense_intronic                     | 8,50 | 0         |
| ENSG00000259635 | ENSG00000259635 | 15 | 64701248  | 64719602  | antisense                          | 8,50 | 0         |
| ENSG00000274270 | ENSG00000274270 | 13 | 50125816  | 50128463  | sense_intronic                     | 8,50 | 7,06E-02  |
| ENSG00000254829 | ENSG00000254829 | 11 | 78015715  | 78016495  | antisense                          | 8,50 | 0         |
| ENSG00000227603 | ENSG00000227603 | 9  | 93435332  | 93437121  | antisense                          | 8,50 | 0         |
| ENSG00000233231 | HNRNPA1P49      | 6  | 166334568 | 166335471 | processed_pseudogene               | 8,50 | 0         |
| ENSG00000232717 | TRIM51JP        | 2  | 95574899  | 95580764  | unprocessed_pseudogene             | 8,50 | 1,40E-02  |
| ENSG00000225671 | FCF1P6          | 1  | 50405430  | 50406024  | processed_pseudogene               | 8,50 | 0,2161218 |
| ENSG00000240219 | ENSG00000240219 | 1  | 204626775 | 204629712 | lincRNA                            | 8,50 | 1,40E-02  |
| ENSG00000225008 | ENSG00000225008 | X  | 155290360 | 155291353 | processed_pseudogene               | 8,50 | 0         |
| ENSG00000269139 | ENSG00000269139 | 19 | 7926001   | 7926810   | processed_transcript               | 8,49 | 9,18E-02  |
| ENSG00000273344 | PAXIP1-AS1      | 7  | 155003448 | 155005703 | lincRNA                            | 8,48 | 0         |
| ENSG00000275638 | ENSG00000275638 | 15 | 65655620  | 65656085  | antisense                          | 8,47 | 0         |
| ENSG00000224152 | ENSG00000224152 | 2  | 159615296 | 159617082 | antisense                          | 8,45 | 0         |
| ENSG00000225770 | ENSG00000225770 | 3  | 196536532 | 196536702 | processed_pseudogene               | 8,44 | 0         |
| ENSG00000273015 | ENSG00000273015 | 12 | 45718046  | 45727775  | lincRNA                            | 8,42 | 0         |
| ENSG00000213856 | VDAC1P2         | X  | 49632500  | 49633349  | processed_pseudogene               | 8,41 | 0         |
| ENSG00000280383 | ENSG00000280383 | 22 | 45657019  | 45680130  | sense_overlapping                  | 8,40 | 0         |
| ENSG00000203616 | RHOT1P2         | 21 | 13936993  | 13937325  | processed_pseudogene               | 8,40 | 0         |
| ENSG00000234883 | MIR155HG        | 21 | 25561909  | 25575168  | lincRNA                            | 8,40 | 0         |
| ENSG00000261123 | ENSG00000261123 | 16 | 2094830   | 2097026   | sense_intronic                     | 8,40 | 1,40E-02  |
| ENSG00000261744 | ENSG00000261744 | 16 | 88512960  | 88531053  | antisense                          | 8,40 | 0         |
| ENSG00000270184 | ENSG00000270184 | 16 | 85784382  | 85787617  | antisense                          | 8,40 | 0         |
| ENSG00000259721 | ENSG00000259721 | 15 | 32717270  | 32719007  | lincRNA                            | 8,40 | 7,06E-02  |
| ENSG00000255581 | ENSG00000255581 | 12 | 8017201   | 8017860   | processed_pseudogene               | 8,40 | 0         |
| ENSG00000254910 | ENSG00000254910 | 11 | 310139    | 311141    | antisense                          | 8,40 | 0         |
| ENSG00000176236 | C10orf111       | 10 | 15095385  | 15097319  | antisense                          | 8,40 | 4,86E-02  |
| ENSG00000261068 | ENSG00000261068 | 6  | 42092233  | 42094259  | lincRNA                            | 8,40 | 1,40E-02  |
| ENSG00000275339 | ENSG00000275339 | 6  | 122454358 | 122454612 | processed_pseudogene               | 8,40 | 1,40E-02  |
| ENSG00000227403 | ENSG00000227403 | 2  | 161244739 | 161249050 | lincRNA                            | 8,40 | 1,40E-02  |
| ENSG00000230385 | ENSG00000230385 | 2  | 230908852 | 230910102 | antisense                          | 8,40 | 0         |
| ENSG00000228086 | ENSG00000228086 | 1  | 100462399 | 100485997 | antisense                          | 8,40 | 0         |
| ENSG00000249741 | ENSG00000249741 | 4  | 143911514 | 143912053 | processed_pseudogene               | 8,38 | 0         |
| ENSG00000231579 | RPL7P21         | 5  | 143332605 | 143333239 | processed_pseudogene               | 8,37 | 0         |
| ENSG00000278177 | ENSG00000278177 | 13 | 93226612  | 93227317  | antisense                          | 8,37 | 0         |
| ENSG00000237161 | ENSG00000237161 | 15 | 21293653  | 21295201  | processed_pseudogene               | 8,36 | 0         |
| ENSG00000189136 | UBE2Q2P1        | 15 | 84526781  | 84571216  | transcribed_unprocessed_pseudogene | 8,34 | 0         |
| ENSG00000234176 | HSPA8P1         | X  | 121203182 | 121205014 | processed_pseudogene               | 8,34 | 0         |
| ENSG00000229591 | ENSG00000229591 | 7  | 152120001 | 152121717 | antisense                          | 8,33 | 0         |



|                 |                 |    |           |           |                                        |      |           |
|-----------------|-----------------|----|-----------|-----------|----------------------------------------|------|-----------|
| ENSG00000222019 | URAHF           | 16 | 90039761  | 90047773  | transcribed_unprocess<br>ed_pseudogene | 8,33 | 0         |
| ENSG00000251224 | CNOT10-AS1      | 3  | 32730635  | 32737454  | antisense                              | 8,32 | 0         |
| ENSG00000228158 | TLE1P1          | X  | 65408084  | 65408672  | processed_pseudogene                   | 8,30 | 0         |
| ENSG00000240522 | RPL7AP10        | 19 | 21149648  | 21150438  | processed_pseudogene                   | 8,30 | 0         |
| ENSG00000267640 | ENSG00000267640 | 19 | 37817359  | 37826638  | lincRNA                                | 8,30 | 0         |
| ENSG00000260347 | MOC51P1         | 16 | 48496990  | 48498601  | processed_pseudogene                   | 8,30 | 0         |
| ENSG00000260442 | ATP2A1-AS1      | 16 | 28878957  | 28879920  | antisense                              | 8,30 | 1,40E-02  |
| ENSG00000259495 | ENSG00000259495 | 15 | 80344853  | 80403575  | lincRNA                                | 8,30 | 0         |
| ENSG00000274376 | ADAMTS7P1       | 15 | 82298553  | 82334609  | transcribed_unprocess<br>ed_pseudogene | 8,30 | 0         |
| ENSG00000176654 | NANOGP1         | 12 | 7890801   | 7900140   | transcribed_unprocess<br>ed_pseudogene | 8,30 | 0         |
| ENSG00000226416 | MRPL23-AS1      | 11 | 1983237   | 1989920   | antisense                              | 8,30 | 7,06E-02  |
| ENSG00000231864 | ENSG00000231864 | 9  | 137063535 | 137064581 | antisense                              | 8,30 | 0         |
| ENSG00000180712 | ENSG00000180712 | 4  | 184340756 | 184353977 | lincRNA                                | 8,30 | 0         |
| ENSG00000248375 | ENSG00000248375 | 4  | 52720081  | 52720831  | processed_pseudogene                   | 8,30 | 0         |
| ENSG00000242052 | ENSG00000242052 | 3  | 119635526 | 119636150 | processed_pseudogene                   | 8,30 | 0         |
| ENSG00000260633 | ENSG00000260633 | 3  | 134347288 | 134349233 | lincRNA                                | 8,30 | 0         |
| ENSG00000177133 | LINC00982       | 1  | 3059615   | 3068437   | antisense                              | 8,30 | 0,2161218 |
| ENSG00000220685 | ENSG00000220685 | 6  | 5065795   | 5066982   | processed_pseudogene                   | 8,29 | 0         |
| ENSG00000231305 | ENSG00000231305 | 3  | 128861313 | 128871540 | antisense                              | 8,29 | 0         |
| ENSG00000272645 | GTF2IP20        | 1  | 223951394 | 223992594 | transcribed_unprocess<br>ed_pseudogene | 8,28 | 0         |
| ENSG00000261824 | LINC00662       | 19 | 27684580  | 27793940  | lincRNA                                | 8,28 | 0         |
| ENSG00000265752 | ENSG00000265752 | 18 | 23957754  | 23982556  | lincRNA                                | 8,27 | 0         |
| ENSG00000241081 | ENSG00000241081 | 14 | 76886377  | 76886750  | processed_pseudogene                   | 8,27 | 0         |
| ENSG00000269145 | ENSG00000269145 | 19 | 18144522  | 18151691  | antisense                              | 8,26 | 0         |
| ENSG00000277879 | ENSG00000277879 | 10 | 117267116 | 117268668 | antisense                              | 8,26 | 0         |
| ENSG00000262477 | ENSG00000262477 | 18 | 32412182  | 32413236  | lincRNA                                | 8,25 | 2,21E-02  |
| ENSG00000214353 | VAC14-AS1       | 16 | 70755098  | 70773251  | antisense                              | 8,24 | 0         |
| ENSG00000248641 | HMGA1P2         | 4  | 73098822  | 73099145  | processed_pseudogene                   | 8,23 | 1,40E-02  |
| ENSG00000124399 | ENSG00000124399 | 4  | 43898962  | 43899351  | processed_pseudogene                   | 8,22 | 0         |
| ENSG00000254236 | ENSG00000254236 | 8  | 103020187 | 103021428 | antisense                              | 8,21 | 0         |
| ENSG00000276488 | ENSG00000276488 | 19 | 55612490  | 55613097  | antisense                              | 8,20 | 0         |
| ENSG00000262372 | ENSG00000262372 | 17 | 46035313  | 46035770  | antisense                              | 8,20 | 0         |
| ENSG00000264070 | DND1P1          | 17 | 45585871  | 45586929  | processed_pseudogene                   | 8,20 | 7,06E-02  |
| ENSG00000260953 | ENSG00000260953 | 16 | 29262273  | 29264479  | lincRNA                                | 8,20 | 0         |
| ENSG00000262721 | ENSG00000262721 | 16 | 30875766  | 30895216  | sense_overlapping                      | 8,20 | 1,40E-02  |
| ENSG00000180221 | TPT1P10         | 10 | 58212541  | 58213036  | processed_pseudogene                   | 8,20 | 0,2161218 |
| ENSG00000251396 | LINC01301       | 8  | 60384588  | 60516795  | lincRNA                                | 8,20 | 0         |
| ENSG00000251023 | ENSG00000251023 | 5  | 93860669  | 93863825  | sense_intronic                         | 8,20 | 1,40E-02  |
| ENSG00000228857 | ENSG00000228857 | 2  | 113831049 | 113843356 | lincRNA                                | 8,20 | 7,06E-02  |
| ENSG00000248821 | ENSG00000248821 | 2  | 95413456  | 95414296  | unprocessed_pseudoge<br>ne             | 8,20 | 0         |
| ENSG00000269981 | ENSG00000269981 | 1  | 137682    | 137965    | processed_pseudogene                   | 8,20 | 0         |
| ENSG00000225400 | RAB28P5         | X  | 136847384 | 136848034 | processed_pseudogene                   | 8,20 | 1,40E-02  |
| ENSG00000213514 | ENSG00000213514 | 10 | 77730766  | 77734769  | processed_pseudogene                   | 8,20 | 0         |
| ENSG00000258357 | ENSG00000258357 | 12 | 94521090  | 94521869  | processed_pseudogene                   | 8,19 | 0         |
| ENSG00000230445 | LRR37A6P        | 10 | 27246350  | 27259455  | transcribed_processed_<br>pseudogene   | 8,19 | 0         |
| ENSG00000253557 | ENSG00000253557 | 8  | 19084992  | 19259469  | lincRNA                                | 8,18 | 0,1392851 |
| ENSG00000238045 | ENSG00000238045 | 16 | 29808636  | 29821252  | antisense                              | 8,17 | 0         |
| ENSG00000271797 | ENSG00000271797 | 5  | 115262505 | 115263448 | antisense                              | 8,17 | 0         |
| ENSG00000255750 | ENSG00000255750 | 12 | 26230819  | 26319720  | antisense                              | 8,15 | 0         |
| ENSG00000271743 | ENSG00000271743 | 8  | 6615604   | 6617198   | lincRNA                                | 8,14 | 6,27E-03  |
| ENSG00000272622 | ENSG00000272622 | 2  | 226800146 | 226811029 | lincRNA                                | 8,13 | 0         |
| ENSG00000235454 | HAUS6P3         | 7  | 53862233  | 53863339  | processed_pseudogene                   | 8,12 | 0         |
| ENSG00000253833 | ENSG00000253833 | 8  | 73984493  | 73984883  | processed_pseudogene                   | 8,11 | 0         |
| ENSG00000215458 | AATBC           | 21 | 43805758  | 43812567  | antisense                              | 8,10 | 0         |
| ENSG00000270164 | LINC01480       | 19 | 41535183  | 41536904  | lincRNA                                | 8,10 | 1,40E-02  |

|                 |                 |    |           |           |                                    |      |           |
|-----------------|-----------------|----|-----------|-----------|------------------------------------|------|-----------|
| ENSG00000260293 | ENSG00000260293 | 16 | 2476558   | 2482173   | sense_intronic                     | 8,10 | 1,40E-02  |
| ENSG00000261346 | ENSG00000261346 | 16 | 30477180  | 30489353  | antisense                          | 8,10 | 0         |
| ENSG00000260103 | ENSG00000260103 | 15 | 74478070  | 74490286  | transcribed_processed_pseudogene   | 8,10 | 0         |
| ENSG00000265967 | ENSG00000265967 | 15 | 64695041  | 64695594  | antisense                          | 8,10 | 0         |
| ENSG00000255038 | ENSG00000255038 | 11 | 66067277  | 66069619  | antisense                          | 8,10 | 0         |
| ENSG00000242338 | BMS1P4          | 10 | 73715843  | 73730469  | transcribed_unprocessed_pseudogene | 8,10 | 0         |
| ENSG00000253636 | ENSG00000253636 | 8  | 73052178  | 73063061  | antisense                          | 8,10 | 0         |
| ENSG00000263683 | ENSG00000263683 | 7  | 30550217  | 30551569  | lincRNA                            | 8,10 | 0         |
| ENSG00000241155 | ARHGAP31-AS1    | 3  | 119314293 | 119322760 | antisense                          | 8,10 | 0         |
| ENSG00000249602 | ENSG00000249602 | 1  | 151763384 | 151769501 | antisense                          | 8,10 | 0         |
| ENSG00000226679 | ENSG00000226679 | X  | 38221391  | 38223667  | antisense                          | 8,10 | 0         |
| ENSG00000264486 | ENSG00000264486 | 17 | 28256438  | 28265551  | lincRNA                            | 8,09 | 0         |
| ENSG00000254821 | ENSG00000254821 | 6  | 4135423   | 4146053   | antisense                          | 8,09 | 0         |
| ENSG00000257839 | ENSG00000257839 | 12 | 76032658  | 76033897  | antisense                          | 8,08 | 0         |
| ENSG00000179967 | PPP1R14BP3      | 4  | 139114930 | 139115374 | processed_pseudogene               | 8,04 | 0         |
| ENSG00000266876 | ENSG00000266876 | 17 | 30068632  | 30069631  | transcribed_processed_pseudogene   | 8,03 | 0         |
| ENSG00000233328 | PFN1P1          | 1  | 171670517 | 171670939 | processed_pseudogene               | 8,00 | 3,30E-03  |
| ENSG00000246898 | LINC00920       | 16 | 66408524  | 66412135  | lincRNA                            | 8,00 | 0         |
| ENSG00000261592 | ENSG00000261592 | 16 | 87396704  | 87400295  | antisense                          | 8,00 | 0         |
| ENSG00000244050 | ENSG00000244050 | 12 | 8199599   | 8218911   | transcribed_unprocessed_pseudogene | 8,00 | 0         |
| ENSG00000280828 | ENSG00000280828 | 7  | 128533652 | 128615970 | unprocessed_pseudogene             | 8,00 | 0         |
| ENSG00000235663 | SAPCD1-AS1      | 6  | 31764310  | 31765588  | antisense                          | 8,00 | 0         |
| ENSG00000229122 | AGBL5-IT1       | 2  | 27061038  | 27061815  | sense_intronic                     | 8,00 | 1,40E-02  |
| ENSG00000272702 | ENSG00000272702 | 2  | 73113018  | 73115907  | processed_transcript               | 8,00 | 7,06E-02  |
| ENSG00000225206 | MIR137HG        | 1  | 97986740  | 98049863  | lincRNA                            | 8,00 | 0         |
| ENSG00000225620 | ENSG00000225620 | 1  | 202632428 | 202632911 | lincRNA                            | 8,00 | 7,06E-02  |
| ENSG00000260698 | ENSG00000260698 | 1  | 246682108 | 246685075 | lincRNA                            | 8,00 | 0         |
| ENSG00000219699 | ENSG00000219699 | 6  | 127659690 | 127660579 | unprocessed_pseudogene             | 7,97 | 0         |
| ENSG00000278576 | ENSG00000278576 | 14 | 88589231  | 88592408  | sense_intronic                     | 7,94 | 0         |
| ENSG00000213205 | STRADBP1        | 7  | 150512559 | 150513839 | processed_pseudogene               | 7,93 | 0         |
| ENSG00000227232 | WASH7P          | 1  | 14404     | 29570     | unprocessed_pseudogene             | 7,93 | 0         |
| ENSG00000236530 | ENSG00000236530 | 4  | 80079532  | 80081122  | processed_pseudogene               | 7,92 | 9,18E-02  |
| ENSG00000235349 | ENSG00000235349 | 7  | 64566814  | 64567443  | processed_pseudogene               | 7,92 | 2,95E-02  |
| ENSG00000244041 | LINC01011       | 6  | 2987967   | 2991173   | lincRNA                            | 7,91 | 0         |
| ENSG00000236360 | ENSG00000236360 | 1  | 52993201  | 52993702  | processed_pseudogene               | 7,91 | 0         |
| ENSG00000265666 | RARA-AS1        | 17 | 40340867  | 40343136  | antisense                          | 7,91 | 0         |
| ENSG00000272787 | ENSG00000272787 | 22 | 23969211  | 23969873  | lincRNA                            | 7,90 | 0         |
| ENSG00000268673 | ENSG00000268673 | 19 | 15760375  | 15770828  | lincRNA                            | 7,90 | 0,2161218 |
| ENSG00000278107 | ENSG00000278107 | 18 | 76805151  | 76805736  | lincRNA                            | 7,90 | 0         |
| ENSG00000269947 | ENSG00000269947 | 17 | 8277763   | 8278436   | lincRNA                            | 7,90 | 0         |
| ENSG00000258708 | SLC25A21-AS1    | 14 | 37171888  | 37173811  | antisense                          | 7,90 | 0         |
| ENSG00000259018 | ENSG00000259018 | 14 | 23356406  | 23357003  | antisense                          | 7,90 | 0         |
| ENSG00000239617 | ENSG00000239617 | 12 | 48903418  | 48903813  | processed_pseudogene               | 7,90 | 1,40E-02  |
| ENSG00000270640 | ENSG00000270640 | 2  | 28396815  | 28397110  | sense_intronic                     | 7,90 | 0         |
| ENSG00000205105 | COX17P1         | 13 | 46490930  | 46491121  | processed_pseudogene               | 7,89 | 0         |
| ENSG00000265496 | ENSG00000265496 | 18 | 49487339  | 49491878  | antisense                          | 7,88 | 0         |
| ENSG00000233330 | ENSG00000233330 | 6  | 149591755 | 149592663 | antisense                          | 7,88 | 0         |
| ENSG00000243759 | ST13P15         | 3  | 143517123 | 143518229 | processed_pseudogene               | 7,88 | 0         |
| ENSG00000259585 | RBM17P4         | 15 | 35298249  | 35299440  | processed_pseudogene               | 7,88 | 7,06E-02  |
| ENSG00000261315 | LARP4P          | 15 | 36617089  | 36619265  | transcribed_processed_pseudogene   | 7,88 | 0         |
| ENSG00000073905 | VDAC1P1         | X  | 80929500  | 80930347  | processed_pseudogene               | 7,86 | 0         |
| ENSG00000231890 | DARS-AS1        | 2  | 135985176 | 136022593 | antisense                          | 7,85 | 0         |
| ENSG00000272182 | ENSG00000272182 | 3  | 58428255  | 58428815  | antisense                          | 7,85 | 0         |

|                 |                 |    |           |           |                                    |      |           |
|-----------------|-----------------|----|-----------|-----------|------------------------------------|------|-----------|
| ENSG00000261840 | ENSG00000261840 | 16 | 30697707  | 30699058  | antisense                          | 7,83 | 0         |
| ENSG00000260589 | STAM-AS1        | 10 | 17641284  | 17643878  | antisense                          | 7,83 | 0,1392851 |
| ENSG00000260082 | ENSG00000260082 | 16 | 30821068  | 30822110  | processed_pseudogene               | 7,82 | 0,1392851 |
| ENSG00000277151 | ENSG00000277151 | 13 | 32782874  | 32788178  | lincRNA                            | 7,82 | 0         |
| ENSG00000243349 | ENSG00000243349 | 10 | 45147394  | 45171389  | processed_transcript               | 7,82 | 0         |
| ENSG00000237705 | ENSG00000237705 | 5  | 56842016  | 56862164  | antisense                          | 7,81 | 0         |
| ENSG00000261737 | ENSG00000261737 | 1  | 86703502  | 86704462  | antisense                          | 7,81 | 0         |
| ENSG00000258016 | HIGD1AP1        | 12 | 53142053  | 53142327  | processed_pseudogene               | 7,81 | 0         |
| ENSG00000272799 | ENSG00000272799 | 18 | 9912316   | 9912849   | lincRNA                            | 7,80 | 0         |
| ENSG00000223878 | ENSG00000223878 | 17 | 15506866  | 15507354  | processed_pseudogene               | 7,80 | 0         |
| ENSG00000262251 | ENSG00000262251 | 17 | 7685260   | 7686371   | sense_intronic                     | 7,80 | 0         |
| ENSG00000259116 | ENSG00000259116 | 14 | 64514154  | 64540368  | antisense                          | 7,80 | 0         |
| ENSG00000255445 | ENSG00000255445 | 11 | 93152075  | 93152750  | processed_pseudogene               | 7,80 | 0         |
| ENSG00000272589 | ZSWIM8-AS1      | 10 | 73796514  | 73801399  | antisense                          | 7,80 | 0         |
| ENSG00000234779 | ENSG00000234779 | 9  | 16726814  | 16727524  | antisense                          | 7,80 | 7,06E-02  |
| ENSG00000176933 | TOB2P1          | 6  | 28217643  | 28218634  | processed_pseudogene               | 7,80 | 0         |
| ENSG00000244675 | ENSG00000244675 | 3  | 194496317 | 194501503 | sense_overlapping                  | 7,80 | 0         |
| ENSG00000270178 | ENSG00000270178 | 3  | 179804063 | 179804366 | lincRNA                            | 7,80 | 7,06E-02  |
| ENSG00000231333 | RPL34P6         | 1  | 200863808 | 200864152 | processed_pseudogene               | 7,80 | 7,06E-02  |
| ENSG00000103472 | RRN3P2          | 16 | 29074976  | 29116718  | transcribed_unprocessed_pseudogene | 7,79 | 0         |
| ENSG00000226823 | ENSG00000226823 | 9  | 33503655  | 33510711  | unprocessed_pseudogene             | 7,78 | 0         |
| ENSG00000236753 | MKLN1-AS        | 7  | 131309744 | 131328222 | processed_transcript               | 7,77 | 0         |
| ENSG00000188451 | SRP72P2         | 6  | 158237336 | 158242797 | processed_pseudogene               | 7,77 | 1,40E-02  |
| ENSG00000234106 | ENSG00000234106 | 11 | 93535468  | 93535816  | processed_pseudogene               | 7,76 | 7,06E-02  |
| ENSG00000277763 | ENSG00000277763 | 14 | 56117316  | 56117990  | lincRNA                            | 7,75 | 0         |
| ENSG00000224546 | EIF4BP3         | 9  | 96146007  | 96147856  | processed_pseudogene               | 7,75 | 0         |
| ENSG00000257715 | ENSG00000257715 | 12 | 96025323  | 96027971  | antisense                          | 7,73 | 0         |
| ENSG00000105988 | NHP2P1          | 10 | 92216332  | 92216793  | processed_pseudogene               | 7,73 | 0         |
| ENSG00000164669 | INTS4P1         | 7  | 65141225  | 65234216  | transcribed_unprocessed_pseudogene | 7,73 | 0         |
| ENSG00000236582 | PRPF38AP2       | 10 | 17577362  | 17578212  | processed_pseudogene               | 7,72 | 0         |
| ENSG00000226029 | ENSG00000226029 | 1  | 16460948  | 16468481  | lincRNA                            | 7,72 | 3,30E-03  |
| ENSG00000275582 | ENSG00000275582 | 20 | 3921279   | 3923400   | antisense                          | 7,70 | 0         |
| ENSG00000232085 | ENSG00000232085 | 1  | 243164638 | 243169445 | antisense                          | 7,70 | 0         |
| ENSG00000264449 | ENSG00000264449 | 18 | 5887487   | 5909122   | antisense                          | 7,70 | 0         |
| ENSG00000263412 | ENSG00000263412 | 17 | 48045141  | 48048073  | processed_transcript               | 7,70 | 1,40E-02  |
| ENSG00000259652 | ENSG00000259652 | 15 | 77043680  | 77045160  | lincRNA                            | 7,70 | 0         |
| ENSG00000250748 | ENSG00000250748 | 12 | 65466820  | 65642372  | lincRNA                            | 7,70 | 0         |
| ENSG00000235286 | ENSG00000235286 | 11 | 111670956 | 111672404 | processed_pseudogene               | 7,70 | 0         |
| ENSG00000233334 | FAM53B-AS1      | 10 | 124703625 | 124714217 | antisense                          | 7,70 | 0         |
| ENSG00000235677 | NPM1P26         | 10 | 96560185  | 96560922  | processed_pseudogene               | 7,70 | 0         |
| ENSG00000238228 | OR7E7P          | 7  | 97946987  | 97947998  | unprocessed_pseudogene             | 7,70 | 0         |
| ENSG00000273183 | ENSG00000273183 | 7  | 154956429 | 154957107 | antisense                          | 7,70 | 1,40E-02  |
| ENSG00000230082 | PRRT3-AS1       | 3  | 9947404   | 9954787   | antisense                          | 7,70 | 0         |
| ENSG00000275956 | ENSG00000275956 | 3  | 52732547  | 52733867  | processed_pseudogene               | 7,70 | 0,2161218 |
| ENSG00000272175 | ENSG00000272175 | 1  | 51801028  | 51801307  | antisense                          | 7,70 | 7,06E-02  |
| ENSG00000267484 | ENSG00000267484 | 19 | 4838332   | 4838907   | antisense                          | 7,69 | 6,27E-03  |
| ENSG00000236986 | ENSG00000236986 | 9  | 131132852 | 131167505 | antisense                          | 7,69 | 0         |
| ENSG00000230074 | ENSG00000230074 | 9  | 34665665  | 34681298  | antisense                          | 7,68 | 0         |
| ENSG00000270607 | ENSG00000270607 | 11 | 19710934  | 19712619  | lincRNA                            | 7,67 | 0,0358681 |
| ENSG00000254551 | ENSG00000254551 | 11 | 83209431  | 83213379  | antisense                          | 7,66 | 0         |
| ENSG00000261819 | ENSG00000261819 | 16 | 14988259  | 14990160  | processed_pseudogene               | 7,65 | 0         |
| ENSG00000272990 | ENSG00000272990 | 3  | 156523740 | 156524247 | antisense                          | 7,65 | 6,27E-03  |
| ENSG00000251136 | ENSG00000251136 | 8  | 89609409  | 89757727  | lincRNA                            | 7,62 | 0         |
| ENSG00000270953 | ENSG00000270953 | 7  | 130507660 | 130508282 | antisense                          | 7,60 | 0         |
| ENSG00000236850 | BMS1P20         | 22 | 22303224  | 22322847  | processed_transcript               | 7,60 | 0         |
| ENSG00000264570 | SNX19P3         | 18 | 14629832  | 14632806  | processed_pseudogene               | 7,60 | 0         |
| ENSG00000265778 | ENSG00000265778 | 18 | 76491652  | 76493918  | antisense                          | 7,60 | 0         |

|                 |                 |    |           |           |                                    |      |           |
|-----------------|-----------------|----|-----------|-----------|------------------------------------|------|-----------|
| ENSG00000231258 | ZSWIM5P2        | 17 | 20583758  | 20591180  | unprocessed_pseudogene             | 7,60 | 0         |
| ENSG00000265702 | ENSG00000265702 | 17 | 62699244  | 62737922  | antisense                          | 7,60 | 1,40E-02  |
| ENSG00000259677 | ENSG00000259677 | 15 | 89876540  | 89877285  | processed_pseudogene               | 7,60 | 7,06E-02  |
| ENSG00000259715 | ENSG00000259715 | 15 | 50359450  | 50360194  | lincRNA                            | 7,60 | 0         |
| ENSG00000235550 | ANKRD26P2       | 13 | 38922727  | 38936199  | unprocessed_pseudogene             | 7,60 | 0         |
| ENSG00000276718 | ENSG00000276718 | 12 | 6466537   | 6467135   | antisense                          | 7,60 | 0         |
| ENSG00000254783 | ENSG00000254783 | 11 | 86283927  | 86284668  | processed_pseudogene               | 7,60 | 0         |
| ENSG00000244733 | ENSG00000244733 | 10 | 79660891  | 79677996  | lincRNA                            | 7,60 | 0         |
| ENSG00000261353 | ENSG00000261353 | 6  | 26527063  | 26527404  | lincRNA                            | 7,60 | 0         |
| ENSG00000251066 | ENSG00000251066 | 5  | 85549409  | 85549952  | processed_pseudogene               | 7,60 | 2,21E-02  |
| ENSG00000249212 | ATP1B1P1        | 4  | 42029209  | 42030123  | unprocessed_pseudogene             | 7,60 | 7,06E-02  |
| ENSG00000236137 | ENSG00000236137 | 1  | 117025482 | 117059490 | antisense                          | 7,60 | 0         |
| ENSG00000279529 | ENSG00000279529 | 19 | 16572624  | 16575340  | antisense                          | 7,60 | 7,06E-02  |
| ENSG00000229619 | MBNL1-AS1       | 3  | 152262616 | 152269555 | antisense                          | 7,60 | 0         |
| ENSG00000235530 | ENSG00000235530 | 17 | 21214331  | 21230035  | antisense                          | 7,58 | 6,27E-03  |
| ENSG00000251188 | ENSG00000251188 | 4  | 268982    | 269531    | processed_pseudogene               | 7,57 | 1,40E-02  |
| ENSG00000241163 | LINC00877       | 3  | 72035300  | 72279503  | lincRNA                            | 7,57 | 0         |
| ENSG00000213189 | BTF3L4P2        | 2  | 159003975 | 159004320 | processed_pseudogene               | 7,56 | 0         |
| ENSG00000255367 | ENSG00000255367 | 11 | 3481520   | 3581211   | lincRNA                            | 7,56 | 0         |
| ENSG00000178803 | ADORA2A-AS1     | 22 | 24429206  | 24495074  | antisense                          | 7,55 | 6,27E-03  |
| ENSG00000257261 | ENSG00000257261 | 12 | 46383679  | 46876159  | lincRNA                            | 7,55 | 0         |
| ENSG00000275106 | ENSG00000275106 | 7  | 128952527 | 128953316 | lincRNA                            | 7,55 | 0,1836819 |
| ENSG00000179978 | ENSG00000179978 | 5  | 70094659  | 70128434  | unprocessed_pseudogene             | 7,55 | 0         |
| ENSG00000243176 | ENSG00000243176 | 3  | 157175223 | 157381265 | processed_transcript               | 7,54 | 0         |
| ENSG00000269349 | ENSG00000269349 | 19 | 52511282  | 52512342  | antisense                          | 7,53 | 0         |
| ENSG00000100181 | TPTEP1          | 22 | 16601887  | 16698742  | lincRNA                            | 7,51 | 0         |
| ENSG00000229917 | RPL7P46         | 16 | 11027024  | 11027763  | processed_pseudogene               | 7,51 | 0         |
| ENSG00000215481 | BCRP3           | 22 | 24632915  | 24653356  | transcribed_unprocessed_pseudogene | 7,50 | 1,40E-02  |
| ENSG00000267938 | EIF1P6          | 19 | 4347780   | 4349061   | unprocessed_pseudogene             | 7,50 | 1,40E-02  |
| ENSG00000266129 | SRP68P1         | 17 | 16787235  | 16788141  | processed_pseudogene               | 7,50 | 1,40E-02  |
| ENSG00000259381 | ENSG00000259381 | 15 | 100645434 | 100646655 | processed_pseudogene               | 7,50 | 1,40E-02  |
| ENSG00000223685 | LINC00571       | 13 | 38050817  | 38143232  | lincRNA                            | 7,50 | 0         |
| ENSG00000271579 | ENSG00000271579 | 12 | 115299588 | 115300708 | lincRNA                            | 7,50 | 0,1836819 |
| ENSG00000278112 | ENSG00000278112 | 12 | 123519390 | 123519856 | sense_intronic                     | 7,50 | 7,06E-02  |
| ENSG00000226645 | ENSG00000226645 | 11 | 116773389 | 116774205 | antisense                          | 7,50 | 3,30E-03  |
| ENSG00000253483 | ENSG00000253483 | 8  | 23483016  | 23483534  | processed_pseudogene               | 7,50 | 0,2161218 |
| ENSG00000281706 | LINC01012       | 6  | 27694035  | 27710222  | lincRNA                            | 7,50 | 0         |
| ENSG00000260641 | ENSG00000260641 | 4  | 98658904  | 98664550  | antisense                          | 7,50 | 6,27E-03  |
| ENSG00000273302 | ENSG00000273302 | 2  | 61199979  | 61200769  | sense_intronic                     | 7,50 | 0         |
| ENSG00000203706 | SERTAD4-AS1     | 1  | 210231456 | 210234047 | antisense                          | 7,50 | 1,40E-02  |
| ENSG00000226443 | GAPDHP32        | 1  | 119533749 | 119534746 | processed_pseudogene               | 7,50 | 1,40E-02  |
| ENSG00000235595 | GAPDHP23        | 1  | 119462029 | 119463021 | processed_pseudogene               | 7,50 | 1,40E-02  |
| ENSG00000236751 | LINC01186       | X  | 46325924  | 46327645  | lincRNA                            | 7,50 | 0         |
| ENSG00000273253 | ENSG00000273253 | 22 | 50199090  | 50200837  | antisense                          | 7,50 | 6,27E-03  |
| ENSG00000213117 | ENSG00000213117 | 6  | 134897874 | 134898759 | processed_pseudogene               | 7,49 | 0         |
| ENSG00000251548 | ENSG00000251548 | 5  | 10664495  | 10665113  | processed_pseudogene               | 7,48 | 0         |
| ENSG00000267113 | ENSG00000267113 | 19 | 35957121  | 35957382  | processed_pseudogene               | 7,47 | 0         |
| ENSG00000213018 | ENSG00000213018 | X  | 71420083  | 71420514  | processed_pseudogene               | 7,47 | 0         |
| ENSG00000255201 | ENSG00000255201 | 8  | 38421889  | 38426096  | antisense                          | 7,46 | 0         |
| ENSG00000255248 | ENSG00000255248 | 11 | 122028355 | 122116323 | sense_overlapping                  | 7,46 | 0         |
| ENSG00000265790 | RNASEH1P1       | 17 | 20901939  | 20902680  | processed_pseudogene               | 7,45 | 0         |
| ENSG00000236204 | LINC01376       | 2  | 18986451  | 19346748  | lincRNA                            | 7,45 | 0         |
| ENSG00000250471 | GMPSP1          | 4  | 8174421   | 8174999   | processed_pseudogene               | 7,45 | 0         |
| ENSG00000248966 | BCLAF1P1        | 5  | 110948029 | 110950780 | processed_pseudogene               | 7,42 | 6,27E-03  |
| ENSG00000214719 | ENSG00000214719 | 17 | 30576464  | 30672789  | processed_transcript               | 7,42 | 0         |

|                 |                 |    |           |           |                                    |      |           |
|-----------------|-----------------|----|-----------|-----------|------------------------------------|------|-----------|
| ENSG00000224452 | RSL24D1P6       | 20 | 32170390  | 32170790  | processed_pseudogene               | 7,40 | 1,40E-02  |
| ENSG00000231703 | ENSG00000231703 | 20 | 53397661  | 53412910  | antisense                          | 7,40 | 1,40E-02  |
| ENSG00000268747 | ENSG00000268747 | 19 | 21276023  | 21276332  | processed_pseudogene               | 7,40 | 7,06E-02  |
| ENSG00000274918 | ENSG00000274918 | 18 | 35317396  | 35317848  | lincRNA                            | 7,40 | 1,40E-02  |
| ENSG00000120664 | SPG20-AS1       | 13 | 36346431  | 36369601  | antisense                          | 7,40 | 0         |
| ENSG00000271155 | ENSG00000271155 | 9  | 95506235  | 95507636  | antisense                          | 7,40 | 0         |
| ENSG00000227855 | DPY19L2P3       | 7  | 29650227  | 29742594  | transcribed_unprocessed_pseudogene | 7,40 | 0         |
| ENSG00000234338 | ENSG00000234338 | 7  | 64835280  | 64836882  | processed_pseudogene               | 7,40 | 1,40E-02  |
| ENSG00000234263 | ENSG00000234263 | 6  | 136629172 | 136647999 | antisense                          | 7,40 | 0         |
| ENSG00000248503 | ENSG00000248503 | X  | 77910741  | 77964890  | transcribed_processed_pseudogene   | 7,40 | 0         |
| ENSG00000273599 | ENSG00000273599 | 10 | 124996064 | 125001491 | antisense                          | 7,40 | 0         |
| ENSG00000235092 | ID2-AS1         | 2  | 8666636   | 8681863   | antisense                          | 7,39 | 0         |
| ENSG00000242193 | ENSG00000242193 | 1  | 178006136 | 178037950 | unitary_pseudogene                 | 7,38 | 0         |
| ENSG00000257913 | ENSG00000257913 | 12 | 48998367  | 49019235  | antisense                          | 7,38 | 0         |
| ENSG00000266282 | UBL5P2          | 17 | 32227890  | 32228108  | processed_pseudogene               | 7,38 | 2,21E-02  |
| ENSG00000227782 | ENSG00000227782 | 17 | 16040472  | 16041273  | antisense                          | 7,34 | 0         |
| ENSG00000229873 | OGFR-AS1        | 20 | 62800627  | 62805587  | antisense                          | 7,33 | 2,95E-02  |
| ENSG00000224785 | ENSG00000224785 | 7  | 23562459  | 23564261  | processed_pseudogene               | 7,33 | 0         |
| ENSG00000232531 | ENSG00000232531 | 2  | 91747940  | 91748986  | processed_pseudogene               | 7,32 | 0         |
| ENSG00000203993 | ARRDC1-AS1      | 9  | 137615332 | 137618906 | antisense                          | 7,32 | 0         |
| ENSG00000230461 | PROX1-AS1       | 1  | 213817751 | 213988508 | processed_transcript               | 7,32 | 3,30E-03  |
| ENSG00000240898 | ENSG00000240898 | 17 | 3665220   | 3665702   | processed_pseudogene               | 7,32 | 6,27E-03  |
| ENSG00000189089 | RIMKLB1         | 21 | 36050214  | 36051377  | processed_pseudogene               | 7,31 | 0         |
| ENSG00000259657 | PIGHP1          | 15 | 59676757  | 59677321  | processed_pseudogene               | 7,30 | 0         |
| ENSG00000267882 | ENSG00000267882 | 20 | 47318502  | 47320754  | antisense                          | 7,30 | 0         |
| ENSG00000277383 | ENSG00000277383 | 19 | 47607873  | 47608454  | antisense                          | 7,30 | 7,06E-02  |
| ENSG00000260740 | ENSG00000260740 | 16 | 31487370  | 31488492  | antisense                          | 7,30 | 1,40E-02  |
| ENSG00000277767 | ENSG00000277767 | 13 | 110916004 | 110917827 | lincRNA                            | 7,30 | 1,40E-02  |
| ENSG00000254602 | ENSG00000254602 | 11 | 57638024  | 57652790  | sense_overlapping                  | 7,30 | 0         |
| ENSG00000255404 | ENSG00000255404 | 11 | 65795946  | 65797219  | antisense                          | 7,30 | 0,2161218 |
| ENSG00000214188 | ST7-OT4         | 7  | 116953899 | 117098806 | sense_intronic                     | 7,30 | 0         |
| ENSG00000248971 | KRT8P46         | 4  | 102728746 | 102730171 | processed_pseudogene               | 7,30 | 0         |
| ENSG00000251442 | LINC01094       | 4  | 78645903  | 78682699  | lincRNA                            | 7,30 | 0         |
| ENSG00000271324 | ENSG00000271324 | 3  | 33793644  | 33794145  | lincRNA                            | 7,30 | 1,40E-02  |
| ENSG00000227740 | ENSG00000227740 | 1  | 175904762 | 175920513 | lincRNA                            | 7,30 | 7,06E-02  |
| ENSG00000196205 | EEF1A1P5        | 9  | 133019486 | 133020874 | processed_pseudogene               | 7,29 | 7,06E-02  |
| ENSG00000213264 | NIP7P2          | 3  | 132401253 | 132401796 | processed_pseudogene               | 7,29 | 0         |
| ENSG00000244306 | LINC01296       | 14 | 19284653  | 19337730  | transcribed_processed_pseudogene   | 7,27 | 0         |
| ENSG00000275400 | ENSG00000275400 | 7  | 66553805  | 66554199  | processed_pseudogene               | 7,25 | 0         |
| ENSG00000219642 | BMPR1APS1       | 6  | 129157523 | 129159120 | processed_pseudogene               | 7,24 | 0         |
| ENSG00000101898 | MCTS2P          | 20 | 31547504  | 31548049  | processed_pseudogene               | 7,24 | 0         |
| ENSG00000229018 | PMS2P7          | 7  | 73005541  | 73021103  | unprocessed_pseudogene             | 7,23 | 0         |
| ENSG00000177993 | ZNRF3-AS1       | 22 | 29024999  | 29031476  | antisense                          | 7,20 | 0         |
| ENSG00000270393 | ENSG00000270393 | 22 | 19018043  | 19018916  | processed_pseudogene               | 7,20 | 1,40E-02  |
| ENSG00000279345 | ENSG00000279345 | 22 | 49805452  | 49807208  | antisense                          | 7,20 | 1,40E-02  |
| ENSG00000266932 | ENSG00000266932 | 19 | 56342432  | 56343419  | transcribed_processed_pseudogene   | 7,20 | 0,2161218 |
| ENSG00000262692 | ENSG00000262692 | 17 | 3721628   | 3722488   | antisense                          | 7,20 | 0         |
| ENSG00000265982 | ENSG00000265982 | 17 | 64778842  | 64778937  | unprocessed_pseudogene             | 7,20 | 0         |
| ENSG00000237425 | RPSAP2          | 6  | 28732017  | 28732904  | processed_pseudogene               | 7,20 | 0         |
| ENSG00000248587 | GDNF-AS1        | 5  | 37840438  | 37875799  | lincRNA                            | 7,20 | 1,40E-02  |
| ENSG00000246090 | ENSG00000246090 | 4  | 99088857  | 99301356  | antisense                          | 7,20 | 0         |
| ENSG00000240541 | TM4SF1-AS1      | 3  | 149377778 | 149386583 | antisense                          | 7,20 | 0         |
| ENSG00000241544 | ENSG00000241544 | 3  | 157081841 | 157088547 | lincRNA                            | 7,20 | 0,2161218 |
| ENSG00000272181 | ENSG00000272181 | 3  | 64019508  | 64019925  | antisense                          | 7,20 | 7,06E-02  |
| ENSG00000272597 | ENSG00000272597 | 3  | 107329430 | 107329962 | lincRNA                            | 7,20 | 1,40E-02  |

|                 |                 |    |           |           |                                    |      |           |
|-----------------|-----------------|----|-----------|-----------|------------------------------------|------|-----------|
| ENSG00000229447 | ENSG00000229447 | 1  | 31263245  | 31263681  | processed_pseudogene               | 7,20 | 0         |
| ENSG00000237491 | ENSG00000237491 | 1  | 778770    | 810060    | lincRNA                            | 7,20 | 0         |
| ENSG00000269227 | ENSG00000269227 | 1  | 1673275   | 1674397   | transcribed_processed_pseudogene   | 7,20 | 0         |
| ENSG00000250656 | ST3GAL1P1       | 4  | 67716375  | 67717388  | processed_pseudogene               | 7,18 | 0,4332376 |
| ENSG00000262662 | ENSG00000262662 | 17 | 80960766  | 80961713  | antisense                          | 7,17 | 0         |
| ENSG00000231858 | ENSG00000231858 | 2  | 191021526 | 191032314 | processed_transcript               | 7,17 | 0         |
| ENSG00000224155 | ENSG00000224155 | 7  | 56304678  | 56305526  | processed_pseudogene               | 7,16 | 0         |
| ENSG00000228834 | ENSG00000228834 | 6  | 108907615 | 108907873 | processed_pseudogene               | 7,16 | 6,27E-03  |
| ENSG00000229780 | UBE2Q1-AS1      | 1  | 154553609 | 154555017 | antisense                          | 7,16 | 0         |
| ENSG00000237846 | ENSG00000237846 | 9  | 40105822  | 40106527  | processed_pseudogene               | 7,15 | 9,18E-02  |
| ENSG00000248795 | ENSG00000248795 | 4  | 138560704 | 138561941 | processed_pseudogene               | 7,15 | 0         |
| ENSG00000239569 | KMT2E-AS1       | 7  | 105013425 | 105014321 | antisense                          | 7,15 | 0         |
| ENSG00000257045 | ENSG00000257045 | 2  | 199325310 | 199329362 | antisense                          | 7,13 | 0         |
| ENSG00000240048 | DDX50P2         | 3  | 154352136 | 154354799 | processed_pseudogene               | 7,11 | 0         |
| ENSG00000235105 | ENSG00000235105 | 1  | 48435967  | 48437223  | processed_pseudogene               | 7,10 | 0         |
| ENSG00000275540 | ENSG00000275540 | 19 | 19740884  | 19750127  | unprocessed_pseudogene             | 7,10 | 7,06E-02  |
| ENSG00000266954 | ENSG00000266954 | 18 | 13644815  | 13645685  | antisense                          | 7,10 | 0         |
| ENSG00000264456 | ENSG00000264456 | 17 | 30971652  | 30973312  | sense_intronic                     | 7,10 | 0         |
| ENSG00000265542 | ENSG00000265542 | 17 | 57771946  | 57834749  | lincRNA                            | 7,10 | 0         |
| ENSG00000258951 | KRT18P7         | 14 | 70594552  | 70595770  | processed_pseudogene               | 7,10 | 0         |
| ENSG00000255627 | ENSG00000255627 | 12 | 22008348  | 22008880  | processed_pseudogene               | 7,10 | 0         |
| ENSG00000257718 | ENSG00000257718 | 12 | 38906451  | 38909592  | antisense                          | 7,10 | 7,06E-02  |
| ENSG00000205584 | ENSG00000205584 | 7  | 72969814  | 72971727  | unprocessed_pseudogene             | 7,10 | 0         |
| ENSG00000228204 | ENSG00000228204 | 7  | 50866747  | 51022990  | antisense                          | 7,10 | 7,06E-02  |
| ENSG00000273319 | ENSG00000273319 | 7  | 130936464 | 130939661 | lincRNA                            | 7,10 | 0         |
| ENSG00000242198 | ENSG00000242198 | 5  | 75374463  | 75374809  | processed_pseudogene               | 7,10 | 0         |
| ENSG00000235151 | ENSG00000235151 | 2  | 241844380 | 241845036 | lincRNA                            | 7,10 | 1,40E-02  |
| ENSG00000267090 | ENSG00000267090 | 19 | 38385522  | 38386759  | antisense                          | 7,09 | 0,0358681 |
| ENSG00000232545 | ENSG00000232545 | 22 | 24101689  | 24103354  | sense_intronic                     | 7,08 | 0         |
| ENSG00000276223 | ENSG00000276223 | 20 | 44746642  | 44747201  | sense_intronic                     | 7,08 | 0,4332376 |
| ENSG00000231184 | FAM58DP         | 13 | 19382454  | 19383072  | processed_pseudogene               | 7,08 | 0         |
| ENSG00000205913 | SRRM2-AS1       | 16 | 2737076   | 2752600   | antisense                          | 7,07 | 0         |
| ENSG00000237737 | DCTN1-AS1       | 2  | 74385486  | 74393882  | antisense                          | 7,07 | 0         |
| ENSG00000249592 | ENSG00000249592 | 4  | 762387    | 781849    | antisense                          | 7,06 | 0         |
| ENSG00000215210 | RBMXP2          | 9  | 30689105  | 30690272  | processed_pseudogene               | 7,06 | 0         |
| ENSG00000250251 | PKD1P6          | 16 | 15125242  | 15154564  | transcribed_unprocessed_pseudogene | 7,05 | 0         |
| ENSG00000273210 | ENSG00000273210 | 21 | 37365477  | 37365932  | antisense                          | 7,00 | 1,40E-02  |
| ENSG00000213671 | OLA1P2          | 17 | 20775642  | 20776905  | processed_pseudogene               | 7,00 | 0         |
| ENSG00000262370 | ENSG00000262370 | 16 | 3076911   | 3087100   | lincRNA                            | 7,00 | 0         |
| ENSG00000276523 | ENSG00000276523 | 16 | 75572185  | 75572685  | antisense                          | 7,00 | 0         |
| ENSG00000259100 | ENSG00000259100 | 14 | 39385404  | 39387102  | processed_pseudogene               | 7,00 | 0         |
| ENSG00000256262 | USP30-AS1       | 12 | 109052350 | 109053952 | antisense                          | 7,00 | 0         |
| ENSG00000236710 | ENSG00000236710 | 11 | 3084393   | 3085443   | processed_pseudogene               | 7,00 | 7,06E-02  |
| ENSG00000269915 | ENSG00000269915 | 11 | 708564    | 727047    | antisense                          | 7,00 | 1,40E-02  |
| ENSG00000254507 | ENSG00000254507 | 8  | 12003400  | 12004082  | transcribed_processed_pseudogene   | 7,00 | 0         |
| ENSG00000230732 | ENSG00000230732 | 3  | 196912646 | 196914579 | sense_intronic                     | 7,00 | 1,40E-02  |
| ENSG00000261159 | ENSG00000261159 | 3  | 128859716 | 128860526 | lincRNA                            | 7,00 | 0         |
| ENSG00000232676 | ADH5P2          | 1  | 79521080  | 79522203  | processed_pseudogene               | 7,00 | 0,2161218 |
| ENSG00000226199 | ENSG00000226199 | X  | 27832175  | 27833204  | processed_pseudogene               | 7,00 | 0         |
| ENSG00000223959 | AFG3L1P         | 16 | 89972586  | 90002161  | unitary_pseudogene                 | 6,99 | 0         |
| ENSG00000272379 | ENSG00000272379 | 6  | 13290018  | 13290490  | lincRNA                            | 6,98 | 0         |
| ENSG00000230832 | ENSG00000230832 | 1  | 147082338 | 147083578 | processed_pseudogene               | 6,98 | 2,21E-02  |
| ENSG00000259345 | ENSG00000259345 | 15 | 38865322  | 39427195  | lincRNA                            | 6,96 | 1,40E-02  |
| ENSG00000251260 | WDFY3-AS1       | 4  | 84803258  | 84810391  | antisense                          | 6,96 | 0         |
| ENSG00000234241 | ENSG00000234241 | 20 | 6213699   | 6215381   | processed_pseudogene               | 6,96 | 0         |
| ENSG00000229847 | EMX2OS          | 10 | 117473215 | 117545068 | antisense                          | 6,94 | 0         |

|                 |                 |    |           |           |                                    |      |           |
|-----------------|-----------------|----|-----------|-----------|------------------------------------|------|-----------|
| ENSG00000272821 | ENSG00000272821 | 22 | 50523926  | 50524780  | antisense                          | 6,93 | 0         |
| ENSG00000224426 | SLC31A1P1       | 3  | 172603440 | 172604006 | processed_pseudogene               | 6,93 | 0         |
| ENSG00000242068 | ENSG00000242068 | 3  | 180772750 | 180773914 | processed_pseudogene               | 6,92 | 0         |
| ENSG00000261572 | ENSG00000261572 | 3  | 32236688  | 32238578  | sense_intronic                     | 6,92 | 0         |
| ENSG00000270076 | ENSG00000270076 | 8  | 11202965  | 11203671  | lincRNA                            | 6,91 | 0,1392851 |
| ENSG00000270804 | ENSG00000270804 | 19 | 57867885  | 57868834  | transcribed_processed_pseudogene   | 6,91 | 0         |
| ENSG00000229771 | ENSG00000229771 | 20 | 40696499  | 40698616  | lincRNA                            | 6,90 | 0,2161218 |
| ENSG00000234187 | AIMP1P1         | 20 | 14127400  | 14128336  | processed_pseudogene               | 6,90 | 0,2161218 |
| ENSG00000228323 | ENSG00000228323 | 19 | 53854581  | 53869107  | antisense                          | 6,90 | 0         |
| ENSG00000267765 | ENSG00000267765 | 17 | 42683187  | 42699466  | antisense                          | 6,90 | 0         |
| ENSG00000227258 | SMIM2-AS1       | 13 | 44110451  | 44240517  | antisense                          | 6,90 | 0         |
| ENSG00000255867 | DENND5B-AS1     | 12 | 31589923  | 31615666  | antisense                          | 6,90 | 0         |
| ENSG00000256069 | A2MP1           | 12 | 9228533   | 9275817   | transcribed_unprocessed_pseudogene | 6,90 | 0         |
| ENSG00000256139 | ENSG00000256139 | 12 | 109111218 | 109125594 | sense_overlapping                  | 6,90 | 0         |
| ENSG00000275936 | ENSG00000275936 | 12 | 120224744 | 120225421 | antisense                          | 6,90 | 7,06E-02  |
| ENSG00000261671 | ENSG00000261671 | 10 | 22257786  | 22258548  | lincRNA                            | 6,90 | 7,06E-02  |
| ENSG00000227582 | ADGRF5P1        | 9  | 62860873  | 62864957  | transcribed_processed_pseudogene   | 6,90 | 7,06E-02  |
| ENSG00000167912 | ENSG00000167912 | 8  | 59119040  | 59121346  | antisense                          | 6,90 | 1,40E-02  |
| ENSG00000248309 | MEF2C-AS1       | 5  | 88883328  | 89466398  | antisense                          | 6,90 | 0         |
| ENSG00000254138 | ENSG00000254138 | 5  | 31093977  | 31267610  | antisense                          | 6,90 | 0         |
| ENSG00000227267 | ENSG00000227267 | 3  | 136055184 | 136055764 | processed_pseudogene               | 6,90 | 0,2161218 |
| ENSG00000222041 | LINC00152       | 2  | 87455368  | 87606805  | lincRNA                            | 6,90 | 0         |
| ENSG00000261379 | ENSG00000261379 | 2  | 226804036 | 226805061 | sense_intronic                     | 6,90 | 0         |
| ENSG00000180458 | ENSG00000180458 | 19 | 37545470  | 37549171  | antisense                          | 6,89 | 0         |
| ENSG00000179743 | ENSG00000179743 | 1  | 15834474  | 15848147  | antisense                          | 6,88 | 0         |
| ENSG00000272606 | ENSG00000272606 | 2  | 55617909  | 55618373  | antisense                          | 6,88 | 0         |
| ENSG00000228363 | ENSG00000228363 | 2  | 86562070  | 86618766  | antisense                          | 6,87 | 0         |
| ENSG00000273619 | ENSG00000273619 | 20 | 62386303  | 62386970  | antisense                          | 6,86 | 4,86E-02  |
| ENSG00000258504 | ENSG00000258504 | 14 | 100291117 | 100294656 | lincRNA                            | 6,85 | 0         |
| ENSG00000247324 | ENSG00000247324 | 16 | 71462278  | 71465941  | antisense                          | 6,85 | 0         |
| ENSG00000182366 | FAM87A          | 8  | 375931    | 383174    | lincRNA                            | 6,85 | 0         |
| ENSG00000279720 | ENSG00000279720 | 21 | 9082601   | 9083101   | processed_pseudogene               | 6,83 | 0         |
| ENSG00000263606 | ENSG00000263606 | 18 | 2945550   | 2946890   | transcribed_processed_pseudogene   | 6,83 | 0         |
| ENSG00000224236 | MRRFP1          | X  | 123116107 | 123117781 | processed_pseudogene               | 6,83 | 3,30E-03  |
| ENSG00000241316 | SUCLG2-AS1      | 3  | 67654697  | 67947713  | lincRNA                            | 6,81 | 0         |
| ENSG00000230311 | TOMM20P4        | X  | 73223124  | 73223558  | processed_pseudogene               | 6,81 | 0         |
| ENSG00000264635 | ENSG00000264635 | 18 | 738058    | 739662    | sense_intronic                     | 6,80 | 0         |
| ENSG00000204584 | ENSG00000204584 | 17 | 49845910  | 49848837  | antisense                          | 6,80 | 1,40E-02  |
| ENSG00000248121 | SMURF2P1        | 17 | 30600796  | 30615980  | transcribed_unprocessed_pseudogene | 6,80 | 1,40E-02  |
| ENSG00000265218 | ENSG00000265218 | 17 | 64892729  | 64910180  | antisense                          | 6,80 | 0         |
| ENSG00000267361 | ENSG00000267361 | 17 | 69094289  | 69095499  | processed_pseudogene               | 6,80 | 0         |
| ENSG00000261685 | ENSG00000261685 | 16 | 50645809  | 50649249  | lincRNA                            | 6,80 | 0         |
| ENSG00000259570 | ENSG00000259570 | 15 | 84394512  | 84395514  | unprocessed_pseudogene             | 6,80 | 0         |
| ENSG00000259687 | LINC01220       | 14 | 75294404  | 75296638  | lincRNA                            | 6,80 | 0         |
| ENSG00000270978 | ENSG00000270978 | 5  | 151848886 | 151850791 | processed_pseudogene               | 6,80 | 0,2161218 |
| ENSG00000250326 | ENSG00000250326 | 4  | 142933195 | 143184861 | antisense                          | 6,80 | 0         |
| ENSG00000231249 | ITPR1-AS1       | 3  | 4490891   | 4493163   | antisense                          | 6,80 | 1,40E-02  |
| ENSG00000229951 | ENSG00000229951 | 2  | 28384409  | 28394672  | antisense                          | 6,80 | 0         |
| ENSG00000232702 | ENSG00000232702 | 6  | 51410081  | 51410537  | processed_pseudogene               | 6,79 | 0         |
| ENSG00000267076 | CCDC58P3        | 18 | 12211378  | 12211807  | processed_pseudogene               | 6,79 | 0         |
| ENSG00000269570 | ENSG00000269570 | 11 | 58611119  | 58612642  | antisense                          | 6,79 | 0         |
| ENSG00000230189 | ENSG00000230189 | 7  | 66409143  | 66490059  | transcribed_unprocessed_pseudogene | 6,77 | 0         |
| ENSG00000261332 | ENSG00000261332 | 16 | 30498766  | 30499554  | antisense                          | 6,77 | 0,1392851 |

|                 |                 |    |           |           |                                    |      |           |
|-----------------|-----------------|----|-----------|-----------|------------------------------------|------|-----------|
| ENSG00000228782 | ENSG00000228782 | 17 | 47450568  | 47492492  | transcribed_unprocessed_pseudogene | 6,76 | 0         |
| ENSG00000229043 | ENSG00000229043 | 7  | 1160374   | 1165267   | antisense                          | 6,76 | 0         |
| ENSG00000278518 | ENSG00000278518 | 10 | 133526259 | 133527513 | antisense                          | 6,73 | 7,06E-02  |
| ENSG00000226471 | ENSG00000226471 | 22 | 28800683  | 28848559  | antisense                          | 6,73 | 2,95E-02  |
| ENSG00000278611 | ENSG00000278611 | 19 | 9538733   | 9539734   | lincRNA                            | 6,73 | 0,1392851 |
| ENSG00000254208 | ENSG00000254208 | 8  | 85177522  | 85178150  | antisense                          | 6,73 | 0         |
| ENSG00000273096 | ENSG00000273096 | 22 | 38736610  | 38736792  | sense_intronic                     | 6,70 | 0         |
| ENSG00000227039 | ITGB2-AS1       | 21 | 44921051  | 44929678  | antisense                          | 6,70 | 0         |
| ENSG00000215388 | ACTG1P3         | 20 | 1160584   | 1161697   | processed_pseudogene               | 6,70 | 0         |
| ENSG00000268751 | SCGB1B2P        | 19 | 34576733  | 34577701  | lincRNA                            | 6,70 | 0,2161218 |
| ENSG00000223544 | ENSG00000223544 | 17 | 15588852  | 15589084  | unprocessed_pseudogene             | 6,70 | 0         |
| ENSG00000277182 | ENSG00000277182 | 17 | 38749360  | 38751457  | antisense                          | 6,70 | 7,06E-02  |
| ENSG00000278829 | ENSG00000278829 | 17 | 42272069  | 42275571  | sense_intronic                     | 6,70 | 0         |
| ENSG00000260488 | ENSG00000260488 | 16 | 11976851  | 11977850  | antisense                          | 6,70 | 0         |
| ENSG00000260727 | SLC7A5P1        | 16 | 29613104  | 29613640  | unprocessed_pseudogene             | 6,70 | 0         |
| ENSG00000259318 | ENSG00000259318 | 14 | 55394940  | 55395233  | processed_pseudogene               | 6,70 | 1,40E-02  |
| ENSG00000277715 | ENSG00000277715 | 12 | 106250759 | 106252786 | antisense                          | 6,70 | 1,40E-02  |
| ENSG00000254409 | ENSG00000254409 | 11 | 43921059  | 44001157  | sense_overlapping                  | 6,70 | 0         |
| ENSG00000254477 | ENSG00000254477 | 11 | 59753015  | 59754975  | antisense                          | 6,70 | 7,06E-02  |
| ENSG00000229672 | ENSG00000229672 | 10 | 3751067   | 3763226   | antisense                          | 6,70 | 0         |
| ENSG00000204837 | ENSG00000204837 | 9  | 39817530  | 39818923  | unprocessed_pseudogene             | 6,70 | 0         |
| ENSG00000260190 | ENSG00000260190 | 9  | 136937169 | 136937988 | sense_overlapping                  | 6,70 | 0         |
| ENSG00000250490 | ENSG00000250490 | 5  | 6310441   | 6339884   | lincRNA                            | 6,70 | 7,06E-02  |
| ENSG00000230606 | ENSG00000230606 | 2  | 97416165  | 97433527  | lincRNA                            | 6,70 | 0         |
| ENSG00000228526 | MIR34AHG        | 1  | 9148011   | 9196983   | lincRNA                            | 6,70 | 7,06E-02  |
| ENSG00000232912 | ENSG00000232912 | 1  | 8424645   | 8434838   | antisense                          | 6,70 | 1,40E-02  |
| ENSG00000223652 | ENSG00000223652 | 5  | 123087248 | 123090299 | antisense                          | 6,69 | 3,30E-03  |
| ENSG00000256789 | ENSG00000256789 | 11 | 63637677  | 63658962  | antisense                          | 6,69 | 0         |
| ENSG00000236772 | ENSG00000236772 | 20 | 32449755  | 32453607  | antisense                          | 6,68 | 0         |
| ENSG00000238133 | MLK7-AS1        | 2  | 173166446 | 173282036 | antisense                          | 6,68 | 0         |
| ENSG00000214027 | ARPC3P5         | 6  | 15934782  | 15935315  | processed_pseudogene               | 6,67 | 0         |
| ENSG00000267394 | ENSG00000267394 | 17 | 44198882  | 44216565  | antisense                          | 6,67 | 0         |
| ENSG00000277687 | ENSG00000277687 | 10 | 118692361 | 118693535 | sense_intronic                     | 6,67 | 0         |
| ENSG00000217416 | ISCA1P1         | 5  | 62776877  | 62777263  | processed_pseudogene               | 6,66 | 0         |
| ENSG00000214035 | ENSG00000214035 | 7  | 145009961 | 145010993 | processed_pseudogene               | 6,64 | 0,0358681 |
| ENSG00000272102 | ENSG00000272102 | 6  | 105273220 | 105273760 | lincRNA                            | 6,64 | 0,0358681 |
| ENSG00000229161 | TCP1P1          | 7  | 42794906  | 42802494  | unprocessed_pseudogene             | 6,63 | 0         |
| ENSG00000274756 | ENSG00000274756 | 17 | 36574462  | 36575325  | processed_pseudogene               | 6,62 | 0         |
| ENSG00000231443 | ENSG00000231443 | 3  | 195937243 | 195938739 | processed_pseudogene               | 6,62 | 0         |
| ENSG00000240890 | ENSG00000240890 | 3  | 132386522 | 132389074 | processed_pseudogene               | 6,61 | 0         |
| ENSG00000224789 | ENSG00000224789 | 2  | 120174885 | 120216544 | antisense                          | 6,61 | 0         |
| ENSG00000240489 | SETP14          | 3  | 155987304 | 155988176 | processed_pseudogene               | 6,61 | 0         |
| ENSG00000128254 | C22orf24        | 22 | 31933521  | 31945518  | processed_transcript               | 6,60 | 0         |
| ENSG00000232710 | ENSG00000232710 | 22 | 42136433  | 42139927  | lincRNA                            | 6,60 | 0         |
| ENSG00000224497 | RPL36P4         | 20 | 35544430  | 35544747  | processed_pseudogene               | 6,60 | 1,40E-02  |
| ENSG00000275894 | ENSG00000275894 | 20 | 45345115  | 45345823  | sense_intronic                     | 6,60 | 0         |
| ENSG00000274767 | ENSG00000274767 | 17 | 36183235  | 36196471  | antisense                          | 6,60 | 1,40E-02  |
| ENSG00000260259 | ENSG00000260259 | 16 | 89682620  | 89686569  | lincRNA                            | 6,60 | 0         |
| ENSG00000259772 | ENSG00000259772 | 15 | 31221999  | 31230838  | lincRNA                            | 6,60 | 7,06E-02  |
| ENSG00000229456 | RLIMP1          | 13 | 40618738  | 40621348  | processed_pseudogene               | 6,60 | 7,06E-02  |
| ENSG00000277423 | ENSG00000277423 | 12 | 120703867 | 120704282 | lincRNA                            | 6,60 | 0         |
| ENSG00000255515 | ENSG00000255515 | 11 | 93609760  | 93610333  | processed_pseudogene               | 6,60 | 0         |
| ENSG00000227073 | SDHDP2          | 7  | 135444461 | 135444925 | processed_pseudogene               | 6,60 | 0         |
| ENSG00000270638 | ENSG00000270638 | 6  | 145735570 | 145737218 | lincRNA                            | 6,60 | 1,40E-02  |
| ENSG00000233006 | ENSG00000233006 | 5  | 132311285 | 132369916 | processed_transcript               | 6,60 | 0         |
| ENSG00000278936 | ENSG00000278936 | 5  | 141183401 | 141201396 | antisense                          | 6,60 | 0         |



|                 |                 |    |           |           |                                    |      |           |
|-----------------|-----------------|----|-----------|-----------|------------------------------------|------|-----------|
| ENSG00000215859 | ENSG00000215859 | 1  | 147993862 | 148014956 | lincRNA                            | 6,60 | 1,40E-02  |
| ENSG00000269934 | ENSG00000269934 | 1  | 228274584 | 228276066 | antisense                          | 6,60 | 0         |
| ENSG00000272853 | ENSG00000272853 | 10 | 14877688  | 14878686  | lincRNA                            | 6,58 | 0         |
| ENSG00000236031 | ENSG00000236031 | 1  | 243545532 | 243548329 | antisense                          | 6,57 | 0         |
| ENSG00000237758 | BANF1P3         | 2  | 230725143 | 230725403 | processed_pseudogene               | 6,56 | 0         |
| ENSG00000228801 | ENSG00000228801 | 8  | 51899325  | 51947173  | antisense                          | 6,56 | 0         |
| ENSG00000278376 | ENSG00000278376 | 11 | 118791254 | 118793137 | lincRNA                            | 6,56 | 3,30E-03  |
| ENSG00000280434 | ENSG00000280434 | 22 | 44139365  | 44153626  | sense_overlapping                  | 6,55 | 3,30E-03  |
| ENSG00000274220 | ENSG00000274220 | 16 | 75433836  | 75436392  | lincRNA                            | 6,55 | 0         |
| ENSG00000248493 | ENSG00000248493 | 5  | 145997218 | 145998003 | processed_pseudogene               | 6,55 | 2,95E-02  |
| ENSG00000267896 | ENSG00000267896 | 19 | 49859882  | 49860514  | antisense                          | 6,54 | 2,21E-02  |
| ENSG00000272625 | ENSG00000272625 | 18 | 2920966   | 2921685   | antisense                          | 6,52 | 0         |
| ENSG00000217716 | RPS10P3         | 9  | 88016300  | 88016793  | processed_pseudogene               | 6,52 | 0,1392851 |
| ENSG00000220583 | RPL35P2         | 6  | 34263311  | 34263673  | processed_pseudogene               | 6,52 | 0,1836819 |
| ENSG00000269473 | ENSG00000269473 | 19 | 58440448  | 58445849  | lincRNA                            | 6,50 | 1,40E-02  |
| ENSG00000259286 | ENSG00000259286 | 15 | 68833830  | 68834749  | processed_pseudogene               | 6,50 | 0,2161218 |
| ENSG00000259705 | ENSG00000259705 | 15 | 48645951  | 48652016  | lincRNA                            | 6,50 | 0         |
| ENSG00000278594 | ENSG00000278594 | 14 | 19131842  | 19132890  | processed_pseudogene               | 6,50 | 0         |
| ENSG00000235481 | UBE2R2-AS1      | 9  | 33785950  | 33818795  | antisense                          | 6,50 | 0         |
| ENSG00000254165 | ENSG00000254165 | 8  | 42537529  | 42538304  | antisense                          | 6,50 | 0         |
| ENSG00000272338 | ENSG00000272338 | 8  | 33360839  | 33361415  | lincRNA                            | 6,50 | 1,40E-02  |
| ENSG00000227986 | TRIM60P18       | 7  | 64355078  | 64356199  | unprocessed_pseudogene             | 6,50 | 4,86E-02  |
| ENSG00000273156 | ENSG00000273156 | 4  | 82344876  | 82345540  | lincRNA                            | 6,50 | 1,40E-02  |
| ENSG00000225399 | ENSG00000225399 | 3  | 49260085  | 49261316  | lincRNA                            | 6,50 | 0         |
| ENSG00000269889 | ENSG00000269889 | 3  | 169769649 | 169772043 | antisense                          | 6,50 | 0         |
| ENSG00000273437 | ENSG00000273437 | 3  | 129163606 | 129163940 | lincRNA                            | 6,50 | 0         |
| ENSG00000234969 | ENSG00000234969 | X  | 74069276  | 74070832  | processed_pseudogene               | 6,50 | 1,40E-02  |
| ENSG00000224093 | ENSG00000224093 | 1  | 93592199  | 93605573  | antisense                          | 6,48 | 0         |
| ENSG00000233247 | ENSG00000233247 | X  | 14244382  | 14244928  | processed_pseudogene               | 6,48 | 0         |
| ENSG00000226864 | ATE1-AS1        | 10 | 121928312 | 121951965 | antisense                          | 6,48 | 3,30E-03  |
| ENSG00000215158 | ENSG00000215158 | 5  | 34164698  | 34244796  | transcribed_unprocessed_pseudogene | 6,47 | 0         |
| ENSG00000261766 | ENSG00000261766 | 16 | 28862166  | 28863340  | antisense                          | 6,46 | 0         |
| ENSG00000225880 | LINC00115       | 1  | 826206    | 827522    | lincRNA                            | 6,46 | 4,86E-02  |
| ENSG00000269300 | ENSG00000269300 | 19 | 8821501   | 8824110   | antisense                          | 6,46 | 0         |
| ENSG00000272894 | ENSG00000272894 | 7  | 7552462   | 7566996   | lincRNA                            | 6,46 | 0         |
| ENSG00000205041 | ENSG00000205041 | 19 | 40273489  | 40275479  | sense_intronic                     | 6,45 | 3,30E-03  |
| ENSG00000234773 | ENSG00000234773 | 19 | 12195015  | 12237767  | lincRNA                            | 6,44 | 0         |
| ENSG00000274457 | ENSG00000274457 | 22 | 29437583  | 29437733  | unprocessed_pseudogene             | 6,40 | 1,40E-02  |
| ENSG00000269959 | SPACA6P-AS      | 19 | 51685363  | 51693456  | lincRNA                            | 6,40 | 0         |
| ENSG00000274015 | ENSG00000274015 | 14 | 63642143  | 63642696  | lincRNA                            | 6,40 | 7,06E-02  |
| ENSG00000226604 | PAPPA-AS2       | 9  | 116285829 | 116288769 | antisense                          | 6,40 | 0         |
| ENSG00000232283 | ENSG00000232283 | 9  | 96246462  | 96250393  | antisense                          | 6,40 | 7,06E-02  |
| ENSG00000254548 | ENSG00000254548 | 8  | 143718246 | 143718891 | antisense                          | 6,40 | 0         |
| ENSG00000237815 | ENSG00000237815 | 7  | 77060345  | 77060479  | processed_pseudogene               | 6,40 | 0         |
| ENSG00000220748 | ENSG00000220748 | 6  | 23971879  | 23972941  | processed_pseudogene               | 6,40 | 0         |
| ENSG00000260273 | ENSG00000260273 | 6  | 109382795 | 109383666 | antisense                          | 6,40 | 0         |
| ENSG00000249572 | ENSG00000249572 | 5  | 33424025  | 33440619  | antisense                          | 6,40 | 0         |
| ENSG00000247950 | SEC24B-AS1      | 4  | 109347475 | 109433817 | antisense                          | 6,40 | 1,40E-02  |
| ENSG00000232439 | RPL18AP7        | 3  | 38526802  | 38527325  | processed_pseudogene               | 6,40 | 0         |
| ENSG00000272148 | ENSG00000272148 | 2  | 27062428  | 27062907  | antisense                          | 6,40 | 0         |
| ENSG00000272432 | ENSG00000272432 | 1  | 25247837  | 25248321  | lincRNA                            | 6,40 | 0         |
| ENSG00000239883 | PARGP1          | 10 | 45854093  | 45972154  | transcribed_unprocessed_pseudogene | 6,39 | 0         |
| ENSG00000226149 | ENSG00000226149 | 6  | 129526626 | 129552587 | lincRNA                            | 6,38 | 0         |
| ENSG00000175147 | TMEM51-AS1      | 1  | 15111815  | 15152464  | antisense                          | 6,38 | 3,30E-03  |
| ENSG00000272948 | ENSG00000272948 | 21 | 37267784  | 37268497  | antisense                          | 6,38 | 0         |
| ENSG00000245330 | ENSG00000245330 | 8  | 119867419 | 119874488 | lincRNA                            | 6,38 | 0         |
| ENSG00000272269 | ENSG00000272269 | 6  | 17706257  | 17707344  | antisense                          | 6,38 | 0         |

|                 |                 |    |           |           |                                    |      |           |
|-----------------|-----------------|----|-----------|-----------|------------------------------------|------|-----------|
| ENSG00000248898 | ENSG00000248898 | 5  | 52675193  | 52788026  | antisense                          | 6,37 | 6,27E-03  |
| ENSG00000268225 | ENSG00000268225 | 19 | 52861807  | 52862866  | processed_pseudogene               | 6,36 | 0         |
| ENSG00000230186 | ENSG00000230186 | 1  | 143905487 | 143934776 | antisense                          | 6,35 | 0         |
| ENSG00000267270 | PARD6G-AS1      | 18 | 80147924  | 80178432  | antisense                          | 6,34 | 0         |
| ENSG00000131401 | NAPSB           | 19 | 50333796  | 50344767  | transcribed_unprocessed_pseudogene | 6,33 | 0         |
| ENSG00000255986 | MT1JP           | 16 | 56635739  | 56637086  | transcribed_unprocessed_pseudogene | 6,33 | 0,1392851 |
| ENSG00000274943 | ENSG00000274943 | 12 | 42361267  | 42361703  | sense_intronic                     | 6,32 | 0         |
| ENSG00000262884 | ENSG00000262884 | 17 | 2962248   | 2965895   | antisense                          | 6,31 | 0         |
| ENSG00000278416 | PMS2P2          | 7  | 75344015  | 75359550  | unprocessed_pseudogene             | 6,31 | 9,18E-02  |
| ENSG00000267082 | ENSG00000267082 | 19 | 11203628  | 11216168  | antisense                          | 6,30 | 0         |
| ENSG00000261783 | ENSG00000261783 | 16 | 75379818  | 75381260  | sense_intronic                     | 6,30 | 1,40E-02  |
| ENSG00000277050 | ENSG00000277050 | 14 | 51637348  | 51637947  | antisense                          | 6,30 | 7,06E-02  |
| ENSG00000238286 | SLC35E1P1       | 13 | 20607268  | 20608131  | processed_pseudogene               | 6,30 | 0         |
| ENSG00000260910 | LINC00565       | 13 | 113926514 | 113928844 | lincRNA                            | 6,30 | 1,40E-02  |
| ENSG00000276916 | ENSG00000276916 | 13 | 113511747 | 113514473 | sense_intronic                     | 6,30 | 0         |
| ENSG00000257221 | ENSG00000257221 | 12 | 108628687 | 108641318 | antisense                          | 6,30 | 1,40E-02  |
| ENSG00000270130 | ENSG00000270130 | 12 | 123960717 | 123961244 | sense_intronic                     | 6,30 | 0         |
| ENSG00000272696 | ENSG00000272696 | 9  | 128316337 | 128316909 | antisense                          | 6,30 | 7,06E-02  |
| ENSG00000214243 | ENSG00000214243 | 7  | 76650401  | 76650897  | processed_pseudogene               | 6,30 | 0         |
| ENSG00000242593 | ENSG00000242593 | 7  | 124032205 | 124395118 | antisense                          | 6,30 | 1,40E-02  |
| ENSG00000249767 | ENPP7P10        | 4  | 9079023   | 9141608   | unprocessed_pseudogene             | 6,30 | 0         |
| ENSG00000241429 | EEF1A1P25       | 3  | 138825063 | 138826329 | processed_pseudogene               | 6,30 | 7,06E-02  |
| ENSG00000244124 | ATP1B3-AS1      | 3  | 141918252 | 141919021 | antisense                          | 6,30 | 0         |
| ENSG00000224376 | ENSG00000224376 | 2  | 231388976 | 231394991 | processed_transcript               | 6,30 | 7,06E-02  |
| ENSG00000282111 | ENSG00000282111 | 1  | 229022773 | 229038274 | lincRNA                            | 6,30 | 0         |
| ENSG00000237917 | PARP4P1         | X  | 26594851  | 26634652  | unprocessed_pseudogene             | 6,30 | 7,06E-02  |
| ENSG00000213700 | RPL17P50        | 10 | 73005833  | 73006595  | processed_pseudogene               | 6,29 | 0,0358681 |
| ENSG00000225822 | UBXN7-AS1       | 3  | 196431385 | 196432530 | antisense                          | 6,29 | 0         |
| ENSG00000177640 | CASC2           | 10 | 118046279 | 118210153 | antisense                          | 6,29 | 0         |
| ENSG00000272579 | ENSG00000272579 | 1  | 193090866 | 193091556 | antisense                          | 6,29 | 0         |
| ENSG00000180105 | ENSG00000180105 | 2  | 206410087 | 206410909 | processed_pseudogene               | 6,27 | 0         |
| ENSG00000196741 | LINC01560       | X  | 47483571  | 47484823  | lincRNA                            | 6,27 | 0         |
| ENSG00000242553 | ENSG00000242553 | 21 | 37221419  | 37237744  | lincRNA                            | 6,27 | 0         |
| ENSG00000226259 | GTF2H2B         | 5  | 70415352  | 70448015  | transcribed_unprocessed_pseudogene | 6,27 | 0         |
| ENSG00000230701 | FBXW4P1         | 22 | 23262767  | 23265005  | processed_pseudogene               | 6,25 | 6,27E-03  |
| ENSG00000240509 | RPL34P18        | 8  | 93957338  | 93957691  | processed_pseudogene               | 6,24 | 0         |
| ENSG00000267309 | ENSG00000267309 | 19 | 36489649  | 36491040  | antisense                          | 6,23 | 0         |
| ENSG00000261173 | ENSG00000261173 | 16 | 46973989  | 46978983  | antisense                          | 6,23 | 0         |
| ENSG00000272750 | ENSG00000272750 | 1  | 222658867 | 222661512 | antisense                          | 6,23 | 0         |
| ENSG00000255642 | PABPC1P4        | 12 | 63822021  | 63823895  | processed_pseudogene               | 6,22 | 0         |
| ENSG00000260448 | LCMT1-AS1       | 16 | 25085592  | 25111555  | lincRNA                            | 6,22 | 0         |
| ENSG00000228137 | ENSG00000228137 | 21 | 46246890  | 46247682  | antisense                          | 6,20 | 0         |
| ENSG00000250731 | TPM3P6          | 19 | 53479350  | 53480091  | processed_pseudogene               | 6,20 | 0         |
| ENSG00000270614 | ENSG00000270614 | 19 | 9348106   | 9348703   | processed_pseudogene               | 6,20 | 0         |
| ENSG00000263847 | ENSG00000263847 | 18 | 9112404   | 9115877   | antisense                          | 6,20 | 0         |
| ENSG00000215097 | DUSP8P3         | 10 | 46774421  | 46776180  | processed_pseudogene               | 6,20 | 1,40E-02  |
| ENSG00000227388 | ENSG00000227388 | 9  | 35772163  | 35790432  | lincRNA                            | 6,20 | 0         |
| ENSG00000230295 | GTF2IP23        | 7  | 66880708  | 66882981  | unprocessed_pseudogene             | 6,20 | 0         |
| ENSG00000243305 | ENSG00000243305 | 3  | 152457759 | 152496813 | antisense                          | 6,20 | 0         |
| ENSG00000233806 | LINC01237       | 2  | 241881363 | 242078722 | processed_transcript               | 6,20 | 0         |
| ENSG00000272512 | ENSG00000272512 | 1  | 995966    | 998051    | lincRNA                            | 6,20 | 0,2161218 |
| ENSG00000236188 | PRKX-AS1        | X  | 3659487   | 3668192   | antisense                          | 6,20 | 0         |
| ENSG00000250492 | INTS6P1         | 5  | 39718984  | 39721513  | processed_pseudogene               | 6,18 | 0         |
| ENSG00000225793 | ENSG00000225793 | 6  | 75285014  | 75297003  | lincRNA                            | 6,18 | 0         |

|                 |                 |    |           |           |                                    |      |           |
|-----------------|-----------------|----|-----------|-----------|------------------------------------|------|-----------|
| ENSG00000268403 | ENSG00000268403 | 11 | 9459556   | 9460702   | antisense                          | 6,17 | 0         |
| ENSG00000261079 | ENSG00000261079 | 16 | 74367462  | 74369826  | lincRNA                            | 6,17 | 0         |
| ENSG00000271966 | ENSG00000271966 | 8  | 67343975  | 67345087  | lincRNA                            | 6,17 | 4,86E-02  |
| ENSG00000253629 | ENSG00000253629 | 8  | 101686547 | 101689093 | antisense                          | 6,16 | 9,18E-02  |
| ENSG00000237868 | ENSG00000237868 | 4  | 122077840 | 122078318 | processed_pseudogene               | 6,16 | 0         |
| ENSG00000262115 | ENSG00000262115 | 17 | 81197393  | 81200288  | antisense                          | 6,15 | 0         |
| ENSG00000261460 | ENSG00000261460 | 15 | 72278867  | 72351794  | antisense                          | 6,15 | 0         |
| ENSG00000279636 | LINC00216       | 14 | 58288033  | 58289158  | lincRNA                            | 6,14 | 0         |
| ENSG00000205861 | C1QTNF9B-AS1    | 13 | 23888889  | 23897263  | antisense                          | 6,14 | 2,21E-02  |
| ENSG00000248079 | DPH6-AS1        | 15 | 35546195  | 35859001  | lincRNA                            | 6,14 | 0         |
| ENSG00000225339 | ENSG00000225339 | 6  | 34248568  | 34286768  | processed_transcript               | 6,13 | 0         |
| ENSG00000235413 | KRT18P63        | 4  | 17911674  | 17912976  | processed_pseudogene               | 6,12 | 0         |
| ENSG00000267623 | ENSG00000267623 | 19 | 27902595  | 27984743  | transcribed_unprocessed_pseudogene | 6,10 | 1,40E-02  |
| ENSG00000259409 | ENSG00000259409 | 15 | 40088832  | 40089386  | antisense                          | 6,10 | 0         |
| ENSG00000213411 | RBM22P2         | 13 | 30539597  | 30543461  | processed_pseudogene               | 6,10 | 0,2161218 |
| ENSG00000237672 | KRR1P1          | 13 | 20070250  | 20072136  | processed_pseudogene               | 6,10 | 0         |
| ENSG00000255968 | ENSG00000255968 | 12 | 26318953  | 26421462  | antisense                          | 6,10 | 0         |
| ENSG00000254756 | ENSG00000254756 | 11 | 66334494  | 66339875  | antisense                          | 6,10 | 1,40E-02  |
| ENSG00000222012 | ENSG00000222012 | 7  | 157614023 | 157618765 | antisense                          | 6,10 | 1,40E-02  |
| ENSG00000226102 | SEPT7P3         | 7  | 35946294  | 35972587  | unprocessed_pseudogene             | 6,10 | 0,2161218 |
| ENSG00000227436 | FCF1P1          | 7  | 23619333  | 23622826  | processed_pseudogene               | 6,10 | 7,06E-02  |
| ENSG00000250474 | WBP1LP2         | 7  | 107628553 | 107629498 | processed_pseudogene               | 6,10 | 0         |
| ENSG00000245711 | NADK2-AS1       | 5  | 36221055  | 36221902  | antisense                          | 6,10 | 0         |
| ENSG00000228852 | ENSG00000228852 | 1  | 95243167  | 95278940  | antisense                          | 6,10 | 7,06E-02  |
| ENSG00000236065 | ENSG00000236065 | 1  | 32987075  | 33032469  | antisense                          | 6,10 | 0         |
| ENSG00000260528 | FAM157C         | 16 | 90102271  | 90186204  | lincRNA                            | 6,08 | 0         |
| ENSG00000253228 | NRBF2P4         | 8  | 107983116 | 107983965 | processed_pseudogene               | 6,07 | 0         |
| ENSG00000217791 | ASS1P9          | 5  | 53859166  | 53860401  | processed_pseudogene               | 6,07 | 0,2161218 |
| ENSG00000242588 | ENSG00000242588 | 7  | 128574751 | 128622694 | processed_transcript               | 6,07 | 0         |
| ENSG00000224224 | HAUS1P2         | X  | 18865771  | 18866554  | processed_pseudogene               | 6,07 | 6,27E-03  |
| ENSG00000277873 | ENSG00000277873 | 12 | 118024817 | 118025518 | antisense                          | 6,06 | 0         |
| ENSG00000237768 | ENSG00000237768 | 10 | 73071295  | 73074008  | antisense                          | 6,06 | 0         |
| ENSG00000228486 | LINC01125       | 2  | 97664217  | 97703064  | antisense                          | 6,04 | 0         |
| ENSG00000232024 | LSM12P1         | 8  | 35525176  | 35525763  | processed_pseudogene               | 6,03 | 0         |
| ENSG00000257267 | ZNF271P         | 18 | 35290282  | 35310766  | unitary_pseudogene                 | 6,03 | 0         |
| ENSG00000245482 | ENSG00000245482 | 12 | 34022281  | 34046417  | antisense                          | 6,03 | 0         |
| ENSG00000227398 | KIF9-AS1        | 3  | 47164497  | 47246601  | antisense                          | 6,02 | 0         |
| ENSG00000273192 | ENSG00000273192 | 22 | 49902228  | 49904576  | lincRNA                            | 6,01 | 0         |
| ENSG00000224790 | ENSG00000224790 | 21 | 36966512  | 36971828  | lincRNA                            | 6,00 | 1,40E-02  |
| ENSG00000270112 | ENSG00000270112 | 18 | 46756487  | 46764408  | processed_transcript               | 6,00 | 0         |
| ENSG00000264290 | ENSG00000264290 | 17 | 29569580  | 29570519  | sense_intronic                     | 6,00 | 0         |
| ENSG00000267042 | ENSG00000267042 | 17 | 42679963  | 42682020  | antisense                          | 6,00 | 1,40E-02  |
| ENSG00000277597 | ENSG00000277597 | 17 | 1684726   | 1685151   | antisense                          | 6,00 | 0         |
| ENSG00000258603 | ENSG00000258603 | 14 | 73616700  | 73633941  | antisense                          | 6,00 | 0         |
| ENSG00000259015 | ENSG00000259015 | 14 | 72960595  | 72961993  | processed_pseudogene               | 6,00 | 0         |
| ENSG00000250133 | HOXC-AS2        | 12 | 53993810  | 53996785  | processed_transcript               | 6,00 | 0         |
| ENSG00000256678 | ENSG00000256678 | 12 | 68805011  | 68805479  | processed_pseudogene               | 6,00 | 1,40E-02  |
| ENSG00000277130 | ENSG00000277130 | 12 | 79818784  | 79819465  | sense_intronic                     | 6,00 | 0         |
| ENSG00000246523 | ENSG00000246523 | 11 | 86955619  | 87000959  | lincRNA                            | 6,00 | 0         |
| ENSG00000196366 | C9orf163        | 9  | 136483495 | 136486067 | lincRNA                            | 6,00 | 0         |
| ENSG00000250714 | ENSG00000250714 | 8  | 23225233  | 23230915  | antisense                          | 6,00 | 0         |
| ENSG00000253553 | ENSG00000253553 | 8  | 88326836  | 88737134  | antisense                          | 6,00 | 0         |
| ENSG00000216331 | HIST1H1PS1      | 6  | 26195566  | 26195771  | unprocessed_pseudogene             | 6,00 | 0         |
| ENSG00000241458 | RPL7P19         | 5  | 138473744 | 138474361 | processed_pseudogene               | 6,00 | 0         |
| ENSG00000248216 | KCTD9P5         | 5  | 37505688  | 37506857  | processed_pseudogene               | 6,00 | 0         |
| ENSG00000232202 | ENSG00000232202 | 2  | 42826322  | 42827617  | processed_pseudogene               | 6,00 | 0         |
| ENSG00000261117 | ENSG00000261117 | 2  | 12715415  | 12716227  | lincRNA                            | 6,00 | 0         |
| ENSG00000225171 | DUTP6           | 1  | 166868748 | 166869209 | processed_pseudogene               | 6,00 | 1,40E-02  |

|                 |                 |    |           |           |                                        |      |           |
|-----------------|-----------------|----|-----------|-----------|----------------------------------------|------|-----------|
| ENSG00000230787 | PSAT1P3         | 1  | 79054945  | 79056055  | processed_pseudogene                   | 6,00 | 0         |
| ENSG00000271914 | ENSG00000271914 | 1  | 35929720  | 35930115  | lincRNA                                | 6,00 | 1,40E-02  |
| ENSG00000280486 | ENSG00000280486 | 19 | 1386804   | 1389651   | antisense                              | 5,99 | 0         |
| ENSG00000243680 | RPL37P23        | 19 | 52143043  | 52143336  | processed_pseudogene                   | 5,98 | 1,40E-02  |
| ENSG00000184669 | OR7E14P         | 11 | 17013998  | 17053024  | transcribed_unprocess<br>ed_pseudogene | 5,95 | 6,27E-03  |
| ENSG00000259544 | ENSG00000259544 | 15 | 85726115  | 85727227  | antisense                              | 5,95 | 0         |
| ENSG00000262601 | ENSG00000262601 | 16 | 85171276  | 85185363  | lincRNA                                | 5,95 | 0         |
| ENSG00000123009 | NME2P1          | 12 | 120282303 | 120282716 | processed_pseudogene                   | 5,95 | 0,0358681 |
| ENSG00000272779 | ENSG00000272779 | 22 | 22303224  | 22310401  | transcribed_unprocess<br>ed_pseudogene | 5,95 | 0         |
| ENSG00000261294 | ENSG00000261294 | 16 | 1206560   | 1207124   | antisense                              | 5,94 | 0         |
| ENSG00000259429 | UBE2Q2P2        | 15 | 82355142  | 82420075  | transcribed_unprocess<br>ed_pseudogene | 5,93 | 0         |
| ENSG00000263829 | FAM60BP         | 18 | 26255698  | 26256355  | processed_pseudogene                   | 5,93 | 0         |
| ENSG00000214391 | TUBAP2          | 11 | 90282560  | 90284172  | processed_pseudogene                   | 5,92 | 1,40E-02  |
| ENSG00000257042 | ENSG00000257042 | 12 | 27958517  | 27969813  | antisense                              | 5,91 | 0,3318209 |
| ENSG00000242457 | RBBP4P2         | 3  | 94075912  | 94077175  | processed_pseudogene                   | 5,91 | 0         |
| ENSG00000266903 | ENSG00000266903 | 19 | 44632199  | 44718759  | antisense                              | 5,90 | 1,40E-02  |
| ENSG00000267107 | PCAT19          | 19 | 41454169  | 41500649  | lincRNA                                | 5,90 | 0         |
| ENSG00000265533 | ENSG00000265533 | 18 | 67516546  | 67899619  | lincRNA                                | 5,90 | 7,06E-02  |
| ENSG00000267456 | ENSG00000267456 | 18 | 36278735  | 36279119  | processed_pseudogene                   | 5,90 | 0         |
| ENSG00000235085 | ENSG00000235085 | 17 | 4673830   | 4696831   | antisense                              | 5,90 | 0         |
| ENSG00000266970 | ENSG00000266970 | 17 | 78360453  | 78373911  | lincRNA                                | 5,90 | 0         |
| ENSG00000260735 | ENSG00000260735 | 16 | 15094411  | 15109197  | antisense                              | 5,90 | 0         |
| ENSG00000263276 | ENSG00000263276 | 16 | 68224713  | 68227734  | sense_overlapping                      | 5,90 | 0         |
| ENSG00000232018 | ENSG00000232018 | 14 | 100960509 | 100967040 | lincRNA                                | 5,90 | 7,06E-02  |
| ENSG00000258930 | ENSG00000258930 | 14 | 71031686  | 71031970  | transcribed_processed_<br>pseudogene   | 5,90 | 1,40E-02  |
| ENSG00000277662 | ENSG00000277662 | 13 | 41229180  | 41229676  | sense_intronic                         | 5,90 | 0         |
| ENSG00000249550 | LINC01234       | 12 | 113679459 | 113773683 | lincRNA                                | 5,90 | 7,06E-02  |
| ENSG00000256234 | ENSG00000256234 | 12 | 26211164  | 26335856  | antisense                              | 5,90 | 0         |
| ENSG00000257740 | ENSG00000257740 | 12 | 56308868  | 56309449  | antisense                              | 5,90 | 0         |
| ENSG00000274105 | ENSG00000274105 | 12 | 32728169  | 32729024  | sense_intronic                         | 5,90 | 0         |
| ENSG00000260398 | ENSG00000260398 | 8  | 78605952  | 78609705  | sense_overlapping                      | 5,90 | 0         |
| ENSG00000272375 | ENSG00000272375 | 8  | 30197404  | 30198048  | lincRNA                                | 5,90 | 1,40E-02  |
| ENSG00000281881 | SPRY4-IT1       | 5  | 142317620 | 142318322 | lincRNA                                | 5,90 | 0         |
| ENSG00000226423 | ENSG00000226423 | 2  | 242025183 | 242026176 | lincRNA                                | 5,90 | 1,40E-02  |
| ENSG00000273305 | ENSG00000273305 | 2  | 95537969  | 95538469  | lincRNA                                | 5,90 | 0         |
| ENSG00000268883 | PNMA6B          | X  | 153075769 | 153076968 | unprocessed_pseudoge<br>ne             | 5,90 | 0,2161218 |
| ENSG00000270820 | ENSG00000270820 | 2  | 61471188  | 61484130  | antisense                              | 5,88 | 0         |
| ENSG00000233020 | ENSG00000233020 | 1  | 70530526  | 70531492  | processed_pseudogene                   | 5,87 | 0         |
| ENSG00000259201 | ENSG00000259201 | 15 | 51887560  | 51901123  | antisense                              | 5,87 | 0         |
| ENSG00000224773 | HSPA8P7         | X  | 114774828 | 114776775 | processed_pseudogene                   | 5,87 | 0         |
| ENSG00000229598 | PRDX3P1         | 22 | 38722743  | 38723505  | processed_pseudogene                   | 5,86 | 2,21E-02  |
| ENSG00000267454 | ZNF582-AS1      | 19 | 56393656  | 56399172  | lincRNA                                | 5,83 | 3,30E-03  |
| ENSG00000267248 | ENSG00000267248 | 17 | 60126535  | 60135644  | processed_transcript                   | 5,83 | 0,1836819 |
| ENSG00000254694 | ENSG00000254694 | 11 | 126208611 | 126209027 | antisense                              | 5,83 | 0         |
| ENSG00000234818 | ENSG00000234818 | 2  | 10589166  | 10604830  | antisense                              | 5,83 | 0         |
| ENSG00000271855 | ENSG00000271855 | 2  | 9555899   | 9556775   | lincRNA                                | 5,83 | 2,95E-02  |
| ENSG00000271011 | ENSG00000271011 | 2  | 178577103 | 178577622 | antisense                              | 5,83 | 0         |
| ENSG00000231445 | TIMM8AP1        | 2  | 162077357 | 162077651 | processed_pseudogene                   | 5,81 | 0         |
| ENSG00000224903 | ENSG00000224903 | 7  | 156654185 | 156657693 | antisense                              | 5,81 | 1,40E-02  |
| ENSG00000273076 | ENSG00000273076 | 22 | 38743495  | 38743910  | antisense                              | 5,80 | 1,40E-02  |
| ENSG00000275632 | ENSG00000275632 | 20 | 6000418   | 6000941   | lincRNA                                | 5,80 | 7,06E-02  |
| ENSG00000268758 | ADGRE4P         | 19 | 6952500   | 6990846   | transcribed_unprocess<br>ed_pseudogene | 5,80 | 0         |
| ENSG00000282393 | ENSG00000282393 | 19 | 248551    | 251571    | lincRNA                                | 5,80 | 0         |
| ENSG00000264031 | ABHD15-AS1      | 17 | 29560547  | 29707090  | antisense                              | 5,80 | 1,40E-02  |
| ENSG00000280734 | LINC01232       | 13 | 99486962  | 99499306  | processed_transcript                   | 5,80 | 0         |

|                 |                 |    |           |           |                                    |      |           |
|-----------------|-----------------|----|-----------|-----------|------------------------------------|------|-----------|
| ENSG00000254928 | ENSG00000254928 | 11 | 74455348  | 74456825  | antisense                          | 5,80 | 0         |
| ENSG00000224215 | ENSG00000224215 | 10 | 23343957  | 23345181  | antisense                          | 5,80 | 1,40E-02  |
| ENSG00000261366 | MANEA-AS1       | 6  | 95575183  | 95577450  | antisense                          | 5,80 | 0         |
| ENSG00000215196 | ENSG00000215196 | 5  | 17130028  | 17217047  | antisense                          | 5,80 | 0         |
| ENSG00000259863 | SH3RF3-AS1      | 2  | 109127327 | 109128930 | lincRNA                            | 5,80 | 0         |
| ENSG00000237623 | ENSG00000237623 | X  | 47273366  | 47274390  | processed_pseudogene               | 5,80 | 0         |
| ENSG00000229502 | ENSG00000229502 | 6  | 157872571 | 157875210 | antisense                          | 5,79 | 0         |
| ENSG00000144158 | ENSG00000144158 | 2  | 113657908 | 113658675 | processed_pseudogene               | 5,79 | 0         |
| ENSG00000228252 | COL6A4P2        | 3  | 130212823 | 130273806 | unitary_pseudogene                 | 5,79 | 6,27E-03  |
| ENSG00000259102 | SMARCE1P3       | 14 | 21162513  | 21163743  | processed_pseudogene               | 5,79 | 1,40E-02  |
| ENSG00000254244 | PAICSP4         | 8  | 4787332   | 4788584   | processed_pseudogene               | 5,78 | 0         |
| ENSG00000237836 | PHKA2-AS1       | X  | 18890296  | 18894497  | antisense                          | 5,78 | 6,27E-03  |
| ENSG00000214192 | UBE2V1P2        | 3  | 175718231 | 175718670 | processed_pseudogene               | 5,78 | 0         |
| ENSG00000214144 | ENSG00000214144 | 1  | 247229940 | 247231880 | processed_pseudogene               | 5,77 | 7,06E-02  |
| ENSG00000253722 | ENSG00000253722 | 8  | 93733216  | 93734022  | antisense                          | 5,75 | 0         |
| ENSG00000224431 | ENSG00000224431 | 5  | 132199456 | 132203487 | processed_pseudogene               | 5,75 | 0         |
| ENSG00000233994 | GDI2P2          | 1  | 72274552  | 72275159  | processed_pseudogene               | 5,74 | 0         |
| ENSG00000256250 | ENSG00000256250 | 12 | 130810606 | 130812438 | lincRNA                            | 5,71 | 1,40E-02  |
| ENSG00000225849 | ENSG00000225849 | 20 | 46463902  | 46465124  | processed_pseudogene               | 5,70 | 1,40E-02  |
| ENSG00000267757 | EML2-AS1        | 19 | 45641494  | 45642840  | processed_transcript               | 5,70 | 0         |
| ENSG00000264808 | ENSG00000264808 | 17 | 29369717  | 29390777  | antisense                          | 5,70 | 1,40E-02  |
| ENSG00000264943 | SH3GL1P2        | 17 | 30624413  | 30625494  | processed_pseudogene               | 5,70 | 1,40E-02  |
| ENSG00000265664 | ENSG00000265664 | 17 | 67032409  | 67033290  | antisense                          | 5,70 | 1,40E-02  |
| ENSG00000277214 | ENSG00000277214 | 16 | 79603572  | 79604177  | lincRNA                            | 5,70 | 0         |
| ENSG00000261187 | ENSG00000261187 | 15 | 72465128  | 72466262  | lincRNA                            | 5,70 | 0,2161218 |
| ENSG00000276172 | ELMO2P1         | 15 | 23083094  | 23121324  | transcribed_unprocessed_pseudogene | 5,70 | 7,06E-02  |
| ENSG00000259129 | LINC00648       | 14 | 47764954  | 47795092  | lincRNA                            | 5,70 | 0,2161218 |
| ENSG00000212125 | TAS2R15P        | 12 | 10964425  | 10965352  | processed_pseudogene               | 5,70 | 1,40E-02  |
| ENSG00000247131 | ENSG00000247131 | 12 | 69713633  | 69738568  | antisense                          | 5,70 | 1,40E-02  |
| ENSG00000229587 | ENSG00000229587 | 9  | 75009828  | 75016036  | sense_intronic                     | 5,70 | 1,40E-02  |
| ENSG00000260454 | ENSG00000260454 | 9  | 90997054  | 91001871  | lincRNA                            | 5,70 | 7,06E-02  |
| ENSG00000184616 | SPDYE12P        | 7  | 74906673  | 74913256  | unprocessed_pseudogene             | 5,70 | 0         |
| ENSG00000248577 | ENSG00000248577 | 5  | 38763158  | 38764289  | processed_pseudogene               | 5,70 | 0,2161218 |
| ENSG00000271993 | ENSG00000271993 | 3  | 37182107  | 37182734  | antisense                          | 5,70 | 0,2161218 |
| ENSG00000204581 | ENSG00000204581 | 2  | 111098345 | 111115588 | antisense                          | 5,70 | 0         |
| ENSG00000225938 | ENSG00000225938 | 1  | 101235683 | 101236528 | antisense                          | 5,70 | 0         |
| ENSG00000227536 | SOC5P4          | X  | 71043214  | 71045470  | processed_pseudogene               | 5,70 | 7,06E-02  |
| ENSG00000245060 | LINC00847       | 5  | 180830957 | 180835726 | lincRNA                            | 5,69 | 0         |
| ENSG00000258983 | ENSG00000258983 | 14 | 88499334  | 88515502  | antisense                          | 5,68 | 0         |
| ENSG00000267265 | ENSG00000267265 | 19 | 55006193  | 55048086  | antisense                          | 5,68 | 0         |
| ENSG00000267165 | ENSG00000267165 | 18 | 11851414  | 11852751  | antisense                          | 5,68 | 0         |
| ENSG00000230615 | ENSG00000230615 | 1  | 44030443  | 44115913  | lincRNA                            | 5,67 | 0         |
| ENSG00000182625 | ENSG00000182625 | 15 | 58686411  | 58686617  | processed_pseudogene               | 5,67 | 0         |
| ENSG00000279623 | ENSG00000279623 | 10 | 21865335  | 21865921  | sense_intronic                     | 5,67 | 0,1836819 |
| ENSG00000250988 | SNHG21          | 15 | 82750564  | 82757206  | antisense                          | 5,65 | 4,86E-02  |
| ENSG00000229638 | RPL4P4          | 3  | 185417495 | 185418778 | processed_pseudogene               | 5,64 | 0         |
| ENSG00000180673 | EXOC5P1         | 4  | 62816826  | 62818794  | processed_pseudogene               | 5,61 | 0         |
| ENSG00000234353 | ENSG00000234353 | 22 | 23638492  | 23640762  | transcribed_unprocessed_pseudogene | 5,60 | 7,06E-02  |
| ENSG00000279954 | ENSG00000279954 | 22 | 45875932  | 45879247  | antisense                          | 5,60 | 0         |
| ENSG00000267874 | ENSG00000267874 | 19 | 35036334  | 35037060  | sense_intronic                     | 5,60 | 1,40E-02  |
| ENSG00000268204 | ENSG00000268204 | 19 | 7633766   | 7636990   | antisense                          | 5,60 | 1,40E-02  |
| ENSG00000268278 | ENSG00000268278 | 19 | 21637974  | 21656300  | unprocessed_pseudogene             | 5,60 | 0         |
| ENSG00000270325 | BNIP3P9         | 19 | 19856975  | 19857527  | processed_pseudogene               | 5,60 | 0,2161218 |
| ENSG00000265139 | ENSG00000265139 | 17 | 32328441  | 32329395  | lincRNA                            | 5,60 | 1,40E-02  |
| ENSG00000261273 | ENSG00000261273 | 16 | 88234785  | 88302511  | lincRNA                            | 5,60 | 0         |
| ENSG00000253284 | ENSG00000253284 | 12 | 19147074  | 19154659  | sense_intronic                     | 5,60 | 0         |
| ENSG00000257496 | ENSG00000257496 | 12 | 46384233  | 46386991  | lincRNA                            | 5,60 | 7,06E-02  |

|                 |                 |    |           |           |                                  |      |           |
|-----------------|-----------------|----|-----------|-----------|----------------------------------|------|-----------|
| ENSG00000274315 | ENSG00000274315 | 12 | 29331434  | 29331936  | antisense                        | 5,60 | 0         |
| ENSG00000275703 | ENSG00000275703 | 12 | 6899752   | 6900212   | lincRNA                          | 5,60 | 1,40E-02  |
| ENSG00000213234 | ST13P10         | 11 | 112267290 | 112268371 | processed_pseudogene             | 5,60 | 0         |
| ENSG00000255176 | ENSG00000255176 | 11 | 118636620 | 118638097 | antisense                        | 5,60 | 1,40E-02  |
| ENSG00000225850 | ENSG00000225850 | 10 | 97334564  | 97343203  | antisense                        | 5,60 | 0         |
| ENSG00000236184 | TCEA1P4         | 9  | 32979560  | 32980403  | processed_pseudogene             | 5,60 | 0         |
| ENSG00000254281 | ENSG00000254281 | 8  | 102978785 | 103000184 | lincRNA                          | 5,60 | 0         |
| ENSG00000203808 | BVES-AS1        | 6  | 105136308 | 105169945 | antisense                        | 5,60 | 0         |
| ENSG00000225407 | ENSG00000225407 | 5  | 76691439  | 76716215  | antisense                        | 5,60 | 0         |
| ENSG00000248692 | ADGRL3-AS1      | 4  | 62071752  | 62165554  | antisense                        | 5,60 | 0         |
| ENSG00000250410 | ENSG00000250410 | 4  | 185370725 | 185390928 | antisense                        | 5,60 | 7,06E-02  |
| ENSG00000229325 | ACAP2-IT1       | 3  | 195280723 | 195282741 | sense_intronic                   | 5,60 | 0         |
| ENSG00000265451 | ENSG00000265451 | 2  | 121530422 | 121532705 | antisense                        | 5,60 | 0         |
| ENSG00000226758 | DISC1-IT1       | 1  | 231925834 | 231945233 | sense_intronic                   | 5,60 | 0         |
| ENSG00000271997 | ENSG00000271997 | 15 | 88501944  | 88505787  | sense_intronic                   | 5,59 | 0         |
| ENSG00000261586 | ENSG00000261586 | 12 | 51817899  | 51820150  | lincRNA                          | 5,59 | 0,3318209 |
| ENSG00000273080 | ENSG00000273080 | 2  | 86195590  | 86196049  | antisense                        | 5,59 | 7,06E-02  |
| ENSG00000253738 | OTUD6B-AS1      | 8  | 91059909  | 91070189  | antisense                        | 5,59 | 0         |
| ENSG00000235903 | CPB2-AS1        | 13 | 46052806  | 46113332  | antisense                        | 5,58 | 0         |
| ENSG00000213080 | ENSG00000213080 | 1  | 160894980 | 160896076 | processed_pseudogene             | 5,55 | 0         |
| ENSG00000254099 | ENSG00000254099 | 5  | 141970637 | 141982687 | antisense                        | 5,55 | 0         |
| ENSG00000241547 | ACTG1P20        | 1  | 27325329  | 27325796  | processed_pseudogene             | 5,54 | 0         |
| ENSG00000262429 | ENSG00000262429 | 17 | 4967995   | 4968822   | antisense                        | 5,54 | 0         |
| ENSG00000215284 | ENSG00000215284 | X  | 46725164  | 46725818  | processed_pseudogene             | 5,54 | 2,21E-02  |
| ENSG00000236700 | LINC01010       | 6  | 134437716 | 134504581 | lincRNA                          | 5,53 | 6,27E-03  |
| ENSG00000257884 | ENSG00000257884 | 14 | 19677837  | 19680104  | transcribed_processed_pseudogene | 5,52 | 6,27E-03  |
| ENSG00000243663 | RPS4XP14        | 12 | 1757231   | 1758011   | processed_pseudogene             | 5,51 | 4,86E-02  |
| ENSG00000266924 | ENSG00000266924 | 18 | 79787121  | 79791432  | lincRNA                          | 5,50 | 1,40E-02  |
| ENSG00000266957 | ENSG00000266957 | 18 | 47077361  | 47091280  | antisense                        | 5,50 | 1,40E-02  |
| ENSG00000262500 | ENSG00000262500 | 17 | 46243606  | 46245044  | processed_pseudogene             | 5,50 | 1,40E-02  |
| ENSG00000267547 | ENSG00000267547 | 17 | 35403837  | 35404373  | lincRNA                          | 5,50 | 0         |
| ENSG00000271009 | ENSG00000271009 | 16 | 73060470  | 73062316  | lincRNA                          | 5,50 | 7,06E-02  |
| ENSG00000258982 | ENSG00000258982 | 14 | 100207407 | 100238555 | antisense                        | 5,50 | 7,06E-02  |
| ENSG00000259065 | ENSG00000259065 | 14 | 73787360  | 73803270  | antisense                        | 5,50 | 0         |
| ENSG00000259648 | ENSG00000259648 | 14 | 67614929  | 67616626  | transcribed_processed_pseudogene | 5,50 | 7,06E-02  |
| ENSG00000273711 | ENSG00000273711 | 14 | 73885392  | 73885555  | antisense                        | 5,50 | 0,2161218 |
| ENSG00000278743 | ENSG00000278743 | 12 | 25385670  | 25386241  | lincRNA                          | 5,50 | 0         |
| ENSG00000227896 | ENSG00000227896 | 10 | 86521945  | 86525101  | antisense                        | 5,50 | 0,4036702 |
| ENSG00000229656 | ENSG00000229656 | 10 | 32958845  | 33082102  | lincRNA                          | 5,50 | 1,40E-02  |
| ENSG00000234175 | ENSG00000234175 | 10 | 13139196  | 13139533  | processed_pseudogene             | 5,50 | 0         |
| ENSG00000204055 | ENSG00000204055 | 9  | 129176771 | 129210548 | antisense                        | 5,50 | 9,18E-02  |
| ENSG00000224846 | ENSG00000224846 | 6  | 2989722   | 2999134   | antisense                        | 5,50 | 0,1836819 |
| ENSG00000214273 | AGGF1P1         | 4  | 190041342 | 190043414 | processed_pseudogene             | 5,50 | 7,06E-02  |
| ENSG00000241560 | ZBTB20-AS1      | 3  | 114351811 | 114388978 | antisense                        | 5,50 | 0         |
| ENSG00000239300 | ENSG00000239300 | 2  | 9505445   | 9512412   | antisense                        | 5,50 | 1,40E-02  |
| ENSG00000281937 | ENSG00000281937 | 1  | 9197143   | 9198906   | lincRNA                          | 5,50 | 1,40E-02  |
| ENSG00000229563 | LINC01204       | X  | 45505388  | 45630202  | lincRNA                          | 5,50 | 0         |
| ENSG00000235522 | ENSG00000235522 | 2  | 105846534 | 105857177 | antisense                        | 5,50 | 0         |
| ENSG00000168405 | CMAHP           | 6  | 25081068  | 25166555  | unitary_pseudogene               | 5,50 | 0         |
| ENSG00000235106 | LINC00094       | 9  | 134025439 | 134034666 | antisense                        | 5,50 | 0         |
| ENSG00000244490 | RWDD4P1         | 7  | 105301522 | 105302086 | processed_pseudogene             | 5,49 | 0         |
| ENSG00000232767 | ENSG00000232767 | 10 | 116670103 | 116672739 | antisense                        | 5,49 | 1,40E-02  |
| ENSG00000267348 | ENSG00000267348 | 19 | 45076510  | 45090391  | antisense                        | 5,48 | 0         |
| ENSG00000227954 | TARID           | 6  | 133502252 | 133892802 | antisense                        | 5,48 | 9,18E-02  |
| ENSG00000268460 | ENSG00000268460 | 19 | 46203426  | 46214837  | processed_transcript             | 5,47 | 0,4332376 |
| ENSG00000269807 | ENSG00000269807 | 19 | 4347244   | 4354057   | antisense                        | 5,47 | 0         |
| ENSG00000182921 | CCDC75P1        | 3  | 73182501  | 73183291  | processed_pseudogene             | 5,47 | 2,21E-02  |
| ENSG00000281021 | ENSG00000281021 | 6  | 149576089 | 149590864 | antisense                        | 5,46 | 0         |
| ENSG00000249435 | ENSG00000249435 | 19 | 53426019  | 53426499  | processed_pseudogene             | 5,45 | 0         |

|                 |                 |    |           |           |                                    |      |           |
|-----------------|-----------------|----|-----------|-----------|------------------------------------|------|-----------|
| ENSG00000269151 | ENSG00000269151 | 19 | 46390515  | 46390852  | antisense                          | 5,45 | 1,40E-02  |
| ENSG00000224729 | PCOLCE-AS1      | 7  | 100589402 | 100604206 | antisense                          | 5,45 | 0         |
| ENSG00000276863 | ENSG00000276863 | 17 | 80333841  | 80334366  | antisense                          | 5,45 | 0         |
| ENSG00000249476 | ENSG00000249476 | 5  | 109237120 | 109326369 | lincRNA                            | 5,44 | 0,3318209 |
| ENSG00000228110 | ST13P19         | 1  | 210265636 | 210267241 | processed_pseudogene               | 5,44 | 0         |
| ENSG00000230882 | ENSG00000230882 | 7  | 76071469  | 76074963  | processed_pseudogene               | 5,43 | 0         |
| ENSG00000223650 | UHRF2P1         | X  | 74105572  | 74107958  | processed_pseudogene               | 5,42 | 0         |
| ENSG00000272944 | ENSG00000272944 | 2  | 221572506 | 221574454 | antisense                          | 5,41 | 3,30E-03  |
| ENSG00000236296 | GUSBP5          | 4  | 143559472 | 143649305 | transcribed_processed_pseudogene   | 5,40 | 0         |
| ENSG00000272367 | ENSG00000272367 | 5  | 87376256  | 87377180  | antisense                          | 5,40 | 0         |
| ENSG00000268564 | ENSG00000268564 | 19 | 15124160  | 15126174  | antisense                          | 5,40 | 0         |
| ENSG00000227158 | ENSG00000227158 | 17 | 17422681  | 17423704  | processed_pseudogene               | 5,40 | 0         |
| ENSG00000266236 | NARF-IT1        | 17 | 82482098  | 82483388  | sense_intronic                     | 5,40 | 0         |
| ENSG00000260628 | ENSG00000260628 | 16 | 31975803  | 32003728  | transcribed_unprocessed_pseudogene | 5,40 | 1,40E-02  |
| ENSG00000260144 | ENSG00000260144 | 15 | 72605183  | 72612326  | unprocessed_pseudogene             | 5,40 | 1,40E-02  |
| ENSG00000257509 | ENSG00000257509 | 12 | 55761550  | 55762628  | sense_intronic                     | 5,40 | 0         |
| ENSG00000237512 | UNC5B-AS1       | 10 | 71217224  | 71218228  | antisense                          | 5,40 | 7,06E-02  |
| ENSG00000228707 | ENSG00000228707 | 9  | 116012361 | 116012965 | lincRNA                            | 5,40 | 7,06E-02  |
| ENSG00000213435 | ATP6VOC3        | 6  | 42727234  | 42727700  | processed_pseudogene               | 5,40 | 1,40E-02  |
| ENSG00000219163 | HMGB1P20        | 6  | 53235621  | 53236297  | processed_pseudogene               | 5,40 | 1,40E-02  |
| ENSG00000229950 | TFAP2A-AS1      | 6  | 10409340  | 10416446  | antisense                          | 5,40 | 0,2161218 |
| ENSG00000271888 | ENSG00000271888 | 6  | 15243923  | 15245000  | lincRNA                            | 5,40 | 0,2161218 |
| ENSG00000250403 | ENSG00000250403 | 4  | 99990737  | 99991477  | processed_pseudogene               | 5,40 | 1,40E-02  |
| ENSG00000273449 | ENSG00000273449 | 4  | 163529771 | 163530697 | lincRNA                            | 5,40 | 7,06E-02  |
| ENSG00000234199 | LINC01191       | 2  | 113979569 | 114007302 | lincRNA                            | 5,40 | 0,2161218 |
| ENSG00000236431 | ENSG00000236431 | 2  | 95536117  | 95536495  | processed_pseudogene               | 5,40 | 0         |
| ENSG00000236269 | ENO1-IT1        | 1  | 8875788   | 8878007   | sense_intronic                     | 5,40 | 0         |
| ENSG00000254942 | ENSG00000254942 | 1  | 109539906 | 109543837 | antisense                          | 5,40 | 1,40E-02  |
| ENSG00000242628 | ENSG00000242628 | 2  | 24214381  | 24221516  | antisense                          | 5,40 | 0         |
| ENSG00000228509 | ENSG00000228509 | 2  | 190676944 | 190708716 | antisense                          | 5,38 | 0         |
| ENSG00000204044 | ENSG00000204044 | 20 | 46013500  | 46022073  | antisense                          | 5,38 | 0         |
| ENSG00000265182 | SRP72P1         | 18 | 49495147  | 49496896  | processed_pseudogene               | 5,38 | 2,95E-02  |
| ENSG00000261779 | ENSG00000261779 | 15 | 75211301  | 75212167  | antisense                          | 5,37 | 3,30E-03  |
| ENSG00000274922 | ENSG00000274922 | 13 | 112686769 | 112689815 | lincRNA                            | 5,37 | 0         |
| ENSG00000276317 | ENSG00000276317 | 20 | 62651272  | 62652186  | antisense                          | 5,36 | 0         |
| ENSG00000271614 | LINC00936       | 12 | 89708959  | 89712590  | lincRNA                            | 5,36 | 0         |
| ENSG00000236308 | ENSG00000236308 | 10 | 100190036 | 100190747 | antisense                          | 5,36 | 0         |
| ENSG00000214264 | KCTD9P4         | 11 | 112180773 | 112183191 | processed_pseudogene               | 5,36 | 0         |
| ENSG00000277072 | STAG3L2         | 7  | 74882163  | 74890610  | transcribed_unprocessed_pseudogene | 5,35 | 0         |
| ENSG00000267892 | ENSG00000267892 | 19 | 38738284  | 38739863  | antisense                          | 5,35 | 1,95E-02  |
| ENSG00000235635 | ENSG00000235635 | 5  | 56941307  | 56947152  | antisense                          | 5,35 | 0         |
| ENSG00000213178 | ENSG00000213178 | 3  | 169483671 | 169484080 | processed_pseudogene               | 5,34 | 0         |
| ENSG00000215630 | GUSBP9          | 5  | 71197646  | 71208130  | unprocessed_pseudogene             | 5,33 | 0         |
| ENSG00000178631 | ACTG1P1         | 3  | 139493809 | 139494937 | processed_pseudogene               | 5,33 | 0,4850164 |
| ENSG00000225602 | MTOR-AS1        | 1  | 11143898  | 11149537  | antisense                          | 5,33 | 0         |
| ENSG00000228170 | ENSG00000228170 | 6  | 3138394   | 3153062   | antisense                          | 5,31 | 0         |
| ENSG00000260552 | ENSG00000260552 | 18 | 36179996  | 36187448  | antisense                          | 5,31 | 6,27E-03  |
| ENSG00000254503 | ENSG00000254503 | 19 | 17417031  | 17418288  | processed_pseudogene               | 5,30 | 0         |
| ENSG00000260060 | ENSG00000260060 | 16 | 31196131  | 31196963  | antisense                          | 5,30 | 0,2161218 |
| ENSG00000260394 | ENSG00000260394 | 16 | 678504    | 679777    | antisense                          | 5,30 | 7,06E-02  |
| ENSG00000262904 | TMPOP2          | 16 | 74667506  | 74668706  | processed_pseudogene               | 5,30 | 0,2161218 |
| ENSG00000258571 | PTTG4P          | 14 | 71085482  | 71085833  | processed_pseudogene               | 5,30 | 0         |
| ENSG00000235049 | LINC00940       | 12 | 1929202   | 1936574   | lincRNA                            | 5,30 | 0         |
| ENSG00000256633 | ENSG00000256633 | 11 | 72584572  | 72587979  | antisense                          | 5,30 | 0         |
| ENSG00000246366 | LACTB2-AS1      | 8  | 70608577  | 70663279  | antisense                          | 5,30 | 0         |
| ENSG00000255366 | ENSG00000255366 | 8  | 47190772  | 47193262  | lincRNA                            | 5,30 | 0         |

|                 |                 |    |           |           |                                    |      |           |
|-----------------|-----------------|----|-----------|-----------|------------------------------------|------|-----------|
| ENSG00000272115 | ENSG00000272115 | 8  | 144409492 | 144409976 | antisense                          | 5,30 | 0         |
| ENSG00000236591 | ENSG00000236591 | 6  | 149027700 | 149032573 | antisense                          | 5,30 | 7,06E-02  |
| ENSG00000254333 | ENSG00000254333 | 5  | 150475531 | 150485968 | lincRNA                            | 5,30 | 0         |
| ENSG00000250238 | ENSG00000250238 | 4  | 105959    | 107114    | processed_pseudogene               | 5,30 | 0,2161218 |
| ENSG00000271746 | ENSG00000271746 | 1  | 6393555   | 6394391   | antisense                          | 5,30 | 0,2161218 |
| ENSG00000274536 | ENSG00000274536 | X  | 66015461  | 66020422  | antisense                          | 5,30 | 0         |
| ENSG00000250602 | ENSG00000250602 | 5  | 126433505 | 126490371 | antisense                          | 5,29 | 0         |
| ENSG00000253954 | HMG1P38         | 15 | 92711808  | 92712110  | processed_pseudogene               | 5,29 | 0         |
| ENSG00000213793 | ZNF888          | 19 | 52915196  | 52923470  | lincRNA                            | 5,25 | 0         |
| ENSG00000241975 | TCEB1P19        | 1  | 88829102  | 88829419  | processed_pseudogene               | 5,25 | 0         |
| ENSG00000260077 | ENSG00000260077 | 2  | 10039092  | 10040663  | lincRNA                            | 5,25 | 0         |
| ENSG00000272888 | LINC01578       | 15 | 92882707  | 92899701  | processed_transcript               | 5,23 | 3,30E-03  |
| ENSG00000223442 | TH2LCRR         | 5  | 132630589 | 132664272 | antisense                          | 5,23 | 0         |
| ENSG00000255893 | ENSG00000255893 | 11 | 94472908  | 94473570  | antisense                          | 5,23 | 1,40E-02  |
| ENSG00000255585 | ENSG00000255585 | 9  | 137776539 | 137789235 | transcribed_processed_pseudogene   | 5,21 | 0         |
| ENSG00000224578 | HNRNPA1P48      | 16 | 51645756  | 51647132  | transcribed_processed_pseudogene   | 5,21 | 0         |
| ENSG00000267396 | ENSG00000267396 | 18 | 58398663  | 58400082  | antisense                          | 5,21 | 6,27E-03  |
| ENSG00000249626 | ENSG00000249626 | 3  | 197634315 | 197635811 | processed_pseudogene               | 5,21 | 0         |
| ENSG00000232926 | ENSG00000232926 | 22 | 19887289  | 19887970  | processed_pseudogene               | 5,20 | 0         |
| ENSG00000225988 | LAMP5-AS1       | 20 | 9505180   | 9514998   | antisense                          | 5,20 | 0         |
| ENSG00000267838 | ENSG00000267838 | 19 | 54438665  | 54439544  | lincRNA                            | 5,20 | 1,40E-02  |
| ENSG00000269050 | ENSG00000269050 | 19 | 38870159  | 38873763  | antisense                          | 5,20 | 7,06E-02  |
| ENSG00000277511 | ENSG00000277511 | 17 | 32127595  | 32128454  | lincRNA                            | 5,20 | 0,2161218 |
| ENSG00000260467 | ENSG00000260467 | 16 | 57681124  | 57701730  | antisense                          | 5,20 | 0         |
| ENSG00000258489 | ENSG00000258489 | 15 | 95463592  | 95493770  | lincRNA                            | 5,20 | 0         |
| ENSG00000259134 | LINC00924       | 15 | 95433095  | 95507847  | lincRNA                            | 5,20 | 0         |
| ENSG00000259659 | ENSG00000259659 | 15 | 44557829  | 44559188  | sense_intronic                     | 5,20 | 1,40E-02  |
| ENSG00000247774 | PCED1B-AS1      | 12 | 47205898  | 47216456  | processed_transcript               | 5,20 | 0         |
| ENSG00000269514 | ENSG00000269514 | 12 | 48198387  | 48202031  | lincRNA                            | 5,20 | 1,40E-02  |
| ENSG00000233690 | EBAG9P1         | 10 | 99697407  | 99697949  | processed_pseudogene               | 5,20 | 1,40E-02  |
| ENSG00000236114 | ENSG00000236114 | 10 | 43523256  | 43525217  | unprocessed_pseudogene             | 5,20 | 7,06E-02  |
| ENSG00000282164 | PEG13           | 8  | 140094894 | 140099137 | sense_intronic                     | 5,20 | 1,40E-02  |
| ENSG00000272370 | ENSG00000272370 | 5  | 65020038  | 65020551  | lincRNA                            | 5,20 | 1,40E-02  |
| ENSG00000235908 | RHOA-IT1        | 3  | 49365145  | 49367006  | sense_intronic                     | 5,20 | 0         |
| ENSG00000251448 | ENSG00000251448 | 3  | 126288867 | 126294024 | lincRNA                            | 5,20 | 0         |
| ENSG00000175772 | LINC01106       | 2  | 110375138 | 110384442 | lincRNA                            | 5,20 | 0         |
| ENSG00000236841 | ENSG00000236841 | 2  | 162159762 | 162173223 | antisense                          | 5,20 | 0,2161218 |
| ENSG00000234678 | ENSG00000234678 | 1  | 202000094 | 202010353 | antisense                          | 5,20 | 0         |
| ENSG00000234998 | ENSG00000234998 | 1  | 121087528 | 121116676 | antisense                          | 5,20 | 0         |
| ENSG00000237415 | NRBF2P3         | 1  | 110848077 | 110848941 | processed_pseudogene               | 5,20 | 1,40E-02  |
| ENSG00000237741 | ENSG00000237741 | X  | 148498113 | 148500615 | antisense                          | 5,20 | 0         |
| ENSG00000268357 | VN1R81P         | 19 | 21123817  | 21124188  | unprocessed_pseudogene             | 5,18 | 0         |
| ENSG00000225140 | ENSG00000225140 | 10 | 628638    | 631255    | antisense                          | 5,18 | 0,1392851 |
| ENSG00000250796 | ENSG00000250796 | 3  | 128869624 | 128870026 | processed_pseudogene               | 5,18 | 0         |
| ENSG00000227193 | ENSG00000227193 | 1  | 121118126 | 121146826 | lincRNA                            | 5,18 | 0         |
| ENSG00000259985 | ENSG00000259985 | 18 | 31685655  | 31686823  | antisense                          | 5,17 | 0         |
| ENSG00000233966 | UBE2SP1         | 17 | 15704232  | 15704900  | processed_pseudogene               | 5,17 | 0         |
| ENSG00000228843 | ENSG00000228843 | 9  | 35756712  | 35757940  | antisense                          | 5,17 | 6,27E-03  |
| ENSG00000272486 | ENSG00000272486 | 8  | 124579631 | 124580648 | antisense                          | 5,17 | 3,30E-03  |
| ENSG00000272848 | ENSG00000272848 | 6  | 169426420 | 169427069 | lincRNA                            | 5,17 | 0,1836819 |
| ENSG00000238039 | ENSG00000238039 | X  | 149511509 | 149526264 | lincRNA                            | 5,17 | 0         |
| ENSG00000177406 | ENSG00000177406 | 12 | 630891    | 663706    | antisense                          | 5,17 | 0         |
| ENSG00000198711 | SSBP3-AS1       | 1  | 54236440  | 54239063  | antisense                          | 5,14 | 0         |
| ENSG00000259736 | CRTC3-AS1       | 15 | 90620007  | 90717141  | antisense                          | 5,13 | 0         |
| ENSG00000241923 | RPL14P3         | 4  | 140366240 | 140366861 | processed_pseudogene               | 5,13 | 0         |
| ENSG00000185495 | ENSG00000185495 | 1  | 223992743 | 224010612 | transcribed_unprocessed_pseudogene | 5,13 | 0         |



|                 |                 |    |           |           |                        |      |           |
|-----------------|-----------------|----|-----------|-----------|------------------------|------|-----------|
| ENSG00000230487 | PSMG3-AS1       | 7  | 1570073   | 1589626   | lincRNA                | 5,12 | 0         |
| ENSG00000248476 | BACH1-IT1       | 21 | 29351634  | 29361894  | sense_intronic         | 5,10 | 0         |
| ENSG00000268739 | ENSG00000268739 | 19 | 51014374  | 51014734  | antisense              | 5,10 | 0,2161218 |
| ENSG00000269054 | ENSG00000269054 | 19 | 58362585  | 58366591  | antisense              | 5,10 | 0         |
| ENSG00000248858 | ENSG00000248858 | 8  | 92699742  | 92879502  | processed_transcript   | 5,10 | 7,06E-02  |
| ENSG00000214988 | RPL7AP26        | 4  | 82490823  | 82491635  | processed_pseudogene   | 5,10 | 7,06E-02  |
| ENSG00000249341 | ENSG00000249341 | 4  | 53659208  | 53737156  | sense_intronic         | 5,10 | 1,40E-02  |
| ENSG00000269506 | ENSG00000269506 | 4  | 54059597  | 54061210  | antisense              | 5,10 | 0         |
| ENSG00000213244 | HIST2H3DP1      | 1  | 121118195 | 121118610 | unprocessed_pseudogene | 5,10 | 0         |
| ENSG00000228549 | ENSG00000228549 | 1  | 16870945  | 16874092  | lincRNA                | 5,10 | 0         |
| ENSG00000224204 | PHEX-AS1        | X  | 22162733  | 22172983  | antisense              | 5,10 | 7,06E-02  |
| ENSG00000251453 | HAUS1P1         | 5  | 140581504 | 140582335 | processed_pseudogene   | 5,10 | 0         |
| ENSG00000272123 | ENSG00000272123 | 5  | 53089016  | 53089468  | antisense              | 5,09 | 0         |
| ENSG00000225094 | SETP20          | 4  | 109553243 | 109554094 | processed_pseudogene   | 5,09 | 0,0358681 |
| ENSG00000238198 | ENSG00000238198 | 1  | 113011687 | 113073105 | lincRNA                | 5,09 | 0         |
| ENSG00000215417 | MIR17HG         | 13 | 91347820  | 91354579  | processed_transcript   | 5,09 | 0,3318209 |
| ENSG00000226438 | ENSG00000226438 | 1  | 39249838  | 39257649  | antisense              | 5,06 | 0         |
| ENSG00000260277 | ENSG00000260277 | 16 | 22083256  | 22092231  | antisense              | 5,06 | 0         |
| ENSG00000278022 | ENSG00000278022 | 15 | 98660210  | 98660668  | sense_intronic         | 5,06 | 0,3318209 |
| ENSG00000273142 | ENSG00000273142 | 7  | 66902857  | 66906297  | lincRNA                | 5,05 | 0         |
| ENSG00000276390 | ENSG00000276390 | 12 | 47699401  | 47699917  | sense_intronic         | 5,05 | 0,2161218 |
| ENSG00000273456 | ENSG00000273456 | 2  | 202374932 | 202375604 | lincRNA                | 5,05 | 0,3565078 |
| ENSG00000268015 | ENSG00000268015 | 19 | 52222225  | 52231294  | antisense              | 5,04 | 0         |
| ENSG00000197258 | EIF4BP6         | 7  | 104667749 | 104669576 | processed_pseudogene   | 5,04 | 0         |
| ENSG00000227946 | ENSG00000227946 | 2  | 206084605 | 206086564 | lincRNA                | 5,03 | 3,30E-03  |
| ENSG00000255121 | ENSG00000255121 | 11 | 118994824 | 118998004 | lincRNA                | 5,02 | 0         |
| ENSG00000225225 | ARL2BPP10       | 22 | 18102457  | 18103649  | processed_pseudogene   | 5,00 | 1,40E-02  |
| ENSG00000227413 | ENSG00000227413 | 22 | 40433136  | 40433641  | processed_pseudogene   | 5,00 | 0         |
| ENSG00000272834 | ENSG00000272834 | 22 | 40415003  | 40415445  | antisense              | 5,00 | 0         |
| ENSG00000227256 | MIS18A-AS1      | 21 | 32277863  | 32280988  | antisense              | 5,00 | 4,86E-02  |
| ENSG00000234750 | ENSG00000234750 | 19 | 12284337  | 12285185  | processed_pseudogene   | 5,00 | 0         |
| ENSG00000268362 | ENSG00000268362 | 19 | 24033445  | 24066909  | lincRNA                | 5,00 | 0         |
| ENSG00000268568 | ENSG00000268568 | 19 | 56672574  | 56673901  | lincRNA                | 5,00 | 7,06E-02  |
| ENSG00000269289 | ENSG00000269289 | 19 | 23919081  | 23957930  | antisense              | 5,00 | 7,06E-02  |
| ENSG00000270947 | ENSG00000270947 | 19 | 22455988  | 22456459  | lincRNA                | 5,00 | 0         |
| ENSG00000264885 | ENSG00000264885 | 17 | 18667629  | 18669461  | sense_intronic         | 5,00 | 0         |
| ENSG00000234769 | WASH4P          | 16 | 14381     | 18068     | unprocessed_pseudogene | 5,00 | 0         |
| ENSG00000254634 | SMG1P6          | 16 | 29425800  | 29447026  | unprocessed_pseudogene | 5,00 | 0         |
| ENSG00000277010 | ENSG00000277010 | 16 | 1223639   | 1224143   | antisense              | 5,00 | 0,2161218 |
| ENSG00000251161 | ENSG00000251161 | 15 | 40906811  | 40910337  | lincRNA                | 5,00 | 0         |
| ENSG00000274403 | ENSG00000274403 | 15 | 42726583  | 42727211  | antisense              | 5,00 | 0         |
| ENSG00000274667 | ENSG00000274667 | 15 | 56729932  | 56730611  | sense_intronic         | 5,00 | 0,0358681 |
| ENSG00000260615 | RPL23AP97       | 13 | 114346167 | 114346637 | processed_pseudogene   | 5,00 | 0,1836819 |
| ENSG00000228753 | EIF4BP2         | 10 | 21028999  | 21030792  | processed_pseudogene   | 5,00 | 0         |
| ENSG00000273474 | ENSG00000273474 | 10 | 13675646  | 13675990  | antisense              | 5,00 | 1,40E-02  |
| ENSG00000215374 | FAM66B          | 8  | 7301611   | 7355354   | lincRNA                | 5,00 | 0         |
| ENSG00000253829 | ENSG00000253829 | 8  | 38844866  | 38846439  | antisense              | 5,00 | 0         |
| ENSG00000272502 | ENSG00000272502 | 8  | 120812219 | 120813359 | antisense              | 5,00 | 1,40E-02  |
| ENSG00000272361 | ENSG00000272361 | 7  | 16593626  | 16594224  | lincRNA                | 5,00 | 0,2161218 |
| ENSG00000218996 | ENSG00000218996 | 6  | 150934968 | 150935566 | processed_pseudogene   | 5,00 | 0         |
| ENSG00000251634 | ENSG00000251634 | 5  | 71102898  | 71128753  | unprocessed_pseudogene | 5,00 | 0         |
| ENSG00000214184 | GCC2-AS1        | 2  | 108507515 | 108534196 | antisense              | 5,00 | 0         |
| ENSG00000265531 | FCGR1C          | 1  | 143874793 | 143883575 | unprocessed_pseudogene | 5,00 | 7,06E-02  |
| ENSG00000273338 | ENSG00000273338 | 1  | 78004346  | 78004554  | antisense              | 5,00 | 0         |
| ENSG00000240695 | ENSG00000240695 | 3  | 136736500 | 136737229 | processed_pseudogene   | 4,99 | 0         |
| ENSG00000261938 | ENSG00000261938 | 16 | 3581181   | 3583266   | lincRNA                | 4,99 | 0         |

|                 |                 |    |           |           |                                    |      |           |
|-----------------|-----------------|----|-----------|-----------|------------------------------------|------|-----------|
| ENSG00000214322 | CBX1P2          | X  | 17099782  | 17100239  | processed_pseudogene               | 4,98 | 0         |
| ENSG00000249180 | ENSG00000249180 | 5  | 96741079  | 96742698  | antisense                          | 4,96 | 0         |
| ENSG00000267260 | ENSG00000267260 | 19 | 36773153  | 36777078  | lincRNA                            | 4,96 | 0         |
| ENSG00000271754 | ENSG00000271754 | 6  | 43519180  | 43519724  | antisense                          | 4,96 | 0         |
| ENSG00000228217 | PNRC2P1         | 1  | 117778087 | 117778506 | processed_pseudogene               | 4,95 | 0         |
| ENSG00000245573 | BDNF-AS         | 11 | 27506838  | 27698174  | antisense                          | 4,94 | 9,18E-02  |
| ENSG00000270605 | ENSG00000270605 | 1  | 28239509  | 28241453  | antisense                          | 4,94 | 0         |
| ENSG00000239407 | ENSG00000239407 | X  | 102884414 | 102906158 | lincRNA                            | 4,93 | 0         |
| ENSG00000217835 | ENSG00000217835 | X  | 65956289  | 65957196  | processed_pseudogene               | 4,93 | 0         |
| ENSG00000170629 | DPY19L2P2       | 7  | 103175133 | 103280410 | transcribed_unprocessed_pseudogene | 4,93 | 0         |
| ENSG00000213667 | PGGT1BP1        | 10 | 50726947  | 50727969  | processed_pseudogene               | 4,92 | 0         |
| ENSG00000254064 | ENSG00000254064 | 8  | 22254576  | 22275162  | antisense                          | 4,92 | 0         |
| ENSG00000259275 | ENSG00000259275 | 15 | 96354237  | 96403803  | lincRNA                            | 4,92 | 4,86E-02  |
| ENSG00000223977 | ENSG00000223977 | 2  | 83218890  | 83219105  | processed_pseudogene               | 4,92 | 0         |
| ENSG00000259388 | ENSG00000259388 | 15 | 49794246  | 49796097  | processed_pseudogene               | 4,91 | 0         |
| ENSG00000217325 | PRELID1P1       | 6  | 126643488 | 126644390 | transcribed_processed_pseudogene   | 4,91 | 0         |
| ENSG00000261557 | EEF1A1P38       | 16 | 27133483  | 27135179  | processed_pseudogene               | 4,91 | 2,95E-02  |
| ENSG00000256001 | ENSG00000256001 | 12 | 127145072 | 127146532 | lincRNA                            | 4,91 | 0         |
| ENSG00000251455 | ENSG00000251455 | 4  | 151674483 | 151677893 | antisense                          | 4,91 | 0,0358681 |
| ENSG00000254873 | ENSG00000254873 | 11 | 118397095 | 118401895 | antisense                          | 4,91 | 0         |
| ENSG00000268560 | ENSG00000268560 | 19 | 20611559  | 20615389  | lincRNA                            | 4,90 | 0         |
| ENSG00000268654 | MIMT1           | 19 | 56840902  | 56848556  | lincRNA                            | 4,90 | 0         |
| ENSG00000261731 | ENSG00000261731 | 16 | 31709113  | 31711984  | antisense                          | 4,90 | 0         |
| ENSG00000263307 | ENSG00000263307 | 16 | 11851649  | 11895611  | antisense                          | 4,90 | 0         |
| ENSG00000188388 | GOLGA6L3        | 15 | 85240472  | 85247170  | unprocessed_pseudogene             | 4,90 | 0         |
| ENSG00000275580 | ENSG00000275580 | 15 | 49343608  | 49344254  | lincRNA                            | 4,90 | 7,06E-02  |
| ENSG00000258875 | ENSG00000258875 | 14 | 91242759  | 91252211  | processed_transcript               | 4,90 | 7,06E-02  |
| ENSG00000259868 | ENSG00000259868 | 14 | 55896547  | 55962970  | processed_transcript               | 4,90 | 7,06E-02  |
| ENSG00000257242 | LINC01619       | 12 | 91984976  | 92142914  | processed_transcript               | 4,90 | 7,06E-02  |
| ENSG00000255029 | ENSG00000255029 | 11 | 29519076  | 29552639  | lincRNA                            | 4,90 | 7,06E-02  |
| ENSG00000253641 | ENSG00000253641 | 8  | 10474565  | 10481974  | lincRNA                            | 4,90 | 0         |
| ENSG00000227038 | GTF2IP7         | 7  | 76090431  | 76108779  | transcribed_unprocessed_pseudogene | 4,90 | 0         |
| ENSG00000229380 | ENSG00000229380 | 7  | 561958    | 565619    | antisense                          | 4,90 | 0,2161218 |
| ENSG00000233559 | ENSG00000233559 | 7  | 130853720 | 130928649 | lincRNA                            | 4,90 | 0         |
| ENSG00000271664 | ENSG00000271664 | 7  | 149275619 | 149277992 | unprocessed_pseudogene             | 4,90 | 0         |
| ENSG00000249960 | ENSG00000249960 | 4  | 82571137  | 82571814  | processed_pseudogene               | 4,90 | 0         |
| ENSG00000223505 | ENSG00000223505 | 1  | 203835585 | 203835912 | processed_pseudogene               | 4,90 | 7,06E-02  |
| ENSG00000238199 | UBE2V2P3        | 1  | 11278616  | 11279351  | processed_pseudogene               | 4,90 | 0,2161218 |
| ENSG00000227060 | LINC00629       | X  | 134549973 | 134559923 | lincRNA                            | 4,90 | 0         |
| ENSG00000230397 | SPTLC1P1        | 10 | 31360955  | 31361215  | transcribed_processed_pseudogene   | 4,89 | 0         |
| ENSG00000235499 | ENSG00000235499 | 2  | 73985132  | 73986343  | lincRNA                            | 4,88 | 0         |
| ENSG00000215023 | ENSG00000215023 | 2  | 241800916 | 241801907 | antisense                          | 4,88 | 0,1836819 |
| ENSG00000267577 | ENSG00000267577 | 19 | 55158939  | 55177540  | antisense                          | 4,88 | 0,4036702 |
| ENSG00000270021 | ENSG00000270021 | 5  | 135399280 | 135401296 | antisense                          | 4,88 | 1,40E-02  |
| ENSG00000226121 | ENSG00000226121 | 2  | 161500885 | 161507705 | processed_pseudogene               | 4,86 | 0         |
| ENSG00000214584 | PGGT1BP2        | 10 | 79892148  | 79893175  | processed_pseudogene               | 4,84 | 0         |
| ENSG00000257286 | ENSG00000257286 | 12 | 113185624 | 113192161 | antisense                          | 4,84 | 9,18E-02  |
| ENSG00000124915 | ENSG00000124915 | 11 | 61746493  | 61757655  | lincRNA                            | 4,84 | 0,1836819 |
| ENSG00000273759 | ENSG00000273759 | 20 | 62928621  | 62929297  | lincRNA                            | 4,83 | 6,27E-03  |
| ENSG00000265188 | ENSG00000265188 | 18 | 5240255   | 5241167   | processed_pseudogene               | 4,83 | 0         |
| ENSG00000274630 | ENSG00000274630 | 17 | 41867581  | 41867736  | antisense                          | 4,83 | 0         |
| ENSG00000267185 | PTP4A2P1        | 17 | 42533532  | 42534009  | processed_pseudogene               | 4,82 | 0         |
| ENSG00000218512 | SPTLC1P2        | 6  | 23856698  | 23856818  | processed_pseudogene               | 4,82 | 0         |
| ENSG00000236397 | DDX11L2         | 2  | 113599036 | 113601261 | unprocessed_pseudogene             | 4,81 | 1,40E-02  |

|                 |                 |    |           |           |                                    |      |           |
|-----------------|-----------------|----|-----------|-----------|------------------------------------|------|-----------|
| ENSG00000270728 | ENSG00000270728 | 1  | 19297080  | 19297903  | processed_pseudogene               | 4,81 | 0         |
| ENSG00000224886 | ENSG00000224886 | 10 | 79684494  | 79684983  | transcribed_processed_pseudogene   | 4,80 | 0         |
| ENSG00000234222 | ENSG00000234222 | 1  | 145926590 | 145959179 | antisense                          | 4,80 | 0         |
| ENSG00000227370 | ENSG00000227370 | 22 | 42132543  | 42132998  | processed_pseudogene               | 4,80 | 0,1392851 |
| ENSG00000228817 | BACH1-IT2       | 21 | 29370497  | 29373709  | lincRNA                            | 4,80 | 1,40E-02  |
| ENSG00000267682 | ENSG00000267682 | 19 | 37337236  | 37337743  | sense_intronic                     | 4,80 | 0         |
| ENSG00000269191 | ENSG00000269191 | 19 | 18532908  | 18536188  | antisense                          | 4,80 | 7,06E-02  |
| ENSG00000269482 | ENSG00000269482 | 16 | 90631     | 91102     | antisense                          | 4,80 | 0         |
| ENSG00000259644 | ENSG00000259644 | 15 | 29728186  | 29729531  | sense_intronic                     | 4,80 | 0         |
| ENSG00000260388 | LINC00562       | 13 | 47930153  | 47932622  | lincRNA                            | 4,80 | 7,06E-02  |
| ENSG00000275963 | ENSG00000275963 | 12 | 12648939  | 12649713  | lincRNA                            | 4,80 | 7,06E-02  |
| ENSG00000276148 | ENSG00000276148 | 12 | 32725248  | 32725660  | antisense                          | 4,80 | 7,06E-02  |
| ENSG00000224812 | TMEM72-AS1      | 10 | 44811024  | 44959689  | antisense                          | 4,80 | 7,06E-02  |
| ENSG00000237631 | ENSG00000237631 | 9  | 95918136  | 95918704  | processed_pseudogene               | 4,80 | 0,2161218 |
| ENSG00000196114 | ENSG00000196114 | 6  | 34576258  | 34576656  | processed_pseudogene               | 4,80 | 0,2161218 |
| ENSG00000260581 | ENSG00000260581 | 5  | 151652275 | 151655449 | antisense                          | 4,80 | 7,06E-02  |
| ENSG00000271737 | ENSG00000271737 | 5  | 134005147 | 134005562 | lincRNA                            | 4,80 | 0         |
| ENSG00000251229 | ENSG00000251229 | 4  | 2505081   | 2506279   | processed_pseudogene               | 4,80 | 1,40E-02  |
| ENSG00000240373 | SEC62-AS1       | 3  | 169978536 | 169985715 | antisense                          | 4,80 | 1,40E-02  |
| ENSG00000243795 | ENSG00000243795 | 3  | 113142350 | 113167819 | lincRNA                            | 4,80 | 7,06E-02  |
| ENSG00000241114 | ENSG00000241114 | 2  | 54079974  | 54080280  | processed_pseudogene               | 4,80 | 0         |
| ENSG00000258545 | RHOXF1-AS1      | X  | 120036236 | 120146854 | antisense                          | 4,80 | 1,40E-02  |
| ENSG00000260081 | ENSG00000260081 | X  | 153599340 | 153604353 | antisense                          | 4,80 | 7,06E-02  |
| ENSG00000233262 | ENSG00000233262 | 9  | 84278219  | 84290131  | antisense                          | 4,80 | 6,27E-03  |
| ENSG00000272686 | ENSG00000272686 | 7  | 123749068 | 123751166 | antisense                          | 4,79 | 0         |
| ENSG00000269800 | PLEKHA3P1       | 19 | 41521043  | 41521989  | processed_pseudogene               | 4,79 | 0         |
| ENSG00000268129 | ENSG00000268129 | 3  | 143000907 | 143001467 | lincRNA                            | 4,78 | 2,21E-02  |
| ENSG00000220695 | ENSG00000220695 | 6  | 100530276 | 100531052 | processed_pseudogene               | 4,77 | 0         |
| ENSG00000231245 | C1DP1           | 10 | 32511336  | 32511737  | processed_pseudogene               | 4,77 | 0         |
| ENSG00000277324 | ENSG00000277324 | 18 | 54268346  | 54270028  | antisense                          | 4,76 | 0         |
| ENSG00000249465 | RBMXP4          | 4  | 109346326 | 109347459 | processed_pseudogene               | 4,76 | 0         |
| ENSG00000214262 | ANKRD36BP1      | 1  | 168245565 | 168247343 | transcribed_processed_pseudogene   | 4,76 | 0         |
| ENSG00000276291 | FRG1HP          | 9  | 40992249  | 41218410  | transcribed_unprocessed_pseudogene | 4,76 | 0         |
| ENSG00000260063 | ENSG00000260063 | 1  | 26692132  | 26694131  | antisense                          | 4,76 | 6,27E-03  |
| ENSG00000244556 | ODCP            | 7  | 129028889 | 129030527 | processed_pseudogene               | 4,75 | 0,1836819 |
| ENSG00000230561 | LINC01183       | 5  | 127703390 | 127941634 | lincRNA                            | 4,75 | 0         |
| ENSG00000205578 | POM121B         | 7  | 73293497  | 73301161  | unprocessed_pseudogene             | 4,74 | 0         |
| ENSG00000255471 | ENSG00000255471 | 11 | 86892214  | 86925037  | antisense                          | 4,74 | 0         |
| ENSG00000244627 | ENSG00000244627 | 22 | 38335762  | 38398929  | transcribed_unprocessed_pseudogene | 4,73 | 4,86E-02  |
| ENSG00000215244 | ENSG00000215244 | 10 | 6277687   | 6335982   | lincRNA                            | 4,73 | 0         |
| ENSG00000214012 | KRT18P38        | 6  | 19612755  | 19614036  | processed_pseudogene               | 4,73 | 0         |
| ENSG00000272368 | ENSG00000272368 | 12 | 50112197  | 50165618  | antisense                          | 4,71 | 6,27E-03  |
| ENSG00000203499 | FAM83H-AS1      | 8  | 143734140 | 143746337 | lincRNA                            | 4,71 | 0         |
| ENSG00000275910 | ENSG00000275910 | 16 | 15015828  | 15016390  | antisense                          | 4,71 | 6,27E-03  |
| ENSG00000235978 | ENSG00000235978 | 3  | 4814294   | 4887293   | antisense                          | 4,70 | 0         |
| ENSG00000273428 | ENSG00000273428 | 22 | 30435544  | 30436247  | lincRNA                            | 4,70 | 0,2161218 |
| ENSG00000227456 | LINC00310       | 21 | 34157724  | 34190244  | lincRNA                            | 4,70 | 7,06E-02  |
| ENSG00000272659 | ENSG00000272659 | 21 | 33309491  | 33310181  | lincRNA                            | 4,70 | 0,2161218 |
| ENSG00000267749 | ENSG00000267749 | 19 | 2641838   | 2643853   | sense_intronic                     | 4,70 | 1,40E-02  |
| ENSG00000267800 | ENSG00000267800 | 18 | 47137018  | 47137290  | processed_pseudogene               | 4,70 | 0         |
| ENSG00000262777 | ENSG00000262777 | 17 | 1424473   | 1426484   | antisense                          | 4,70 | 0         |
| ENSG00000263107 | ENSG00000263107 | 17 | 19582116  | 19582275  | processed_pseudogene               | 4,70 | 0         |
| ENSG00000267365 | KCNJ2-AS1       | 17 | 70166961  | 70169402  | antisense                          | 4,70 | 0         |
| ENSG00000261613 | ENSG00000261613 | 16 | 2554060   | 2556060   | antisense                          | 4,70 | 7,06E-02  |
| ENSG00000259658 | ENSG00000259658 | 15 | 101737099 | 101745710 | lincRNA                            | 4,70 | 0         |
| ENSG00000277144 | ENSG00000277144 | 15 | 59115547  | 59116089  | lincRNA                            | 4,70 | 0,2161218 |

|                 |                 |    |           |           |                                    |      |           |
|-----------------|-----------------|----|-----------|-----------|------------------------------------|------|-----------|
| ENSG00000260711 | ENSG00000260711 | 14 | 91752856  | 91759798  | sense_intronic                     | 4,70 | 7,06E-02  |
| ENSG00000256973 | ENSG00000256973 | 12 | 22460519  | 22463914  | lincRNA                            | 4,70 | 0         |
| ENSG00000258181 | ENSG00000258181 | 12 | 47248124  | 47257539  | lincRNA                            | 4,70 | 0         |
| ENSG00000276505 | ENSG00000276505 | 11 | 117297005 | 117297328 | sense_intronic                     | 4,70 | 7,06E-02  |
| ENSG00000226562 | CYP4F26P        | 9  | 33580695  | 33605293  | lincRNA                            | 4,70 | 0         |
| ENSG00000234709 | UPF3AP3         | 9  | 99998301  | 99999069  | transcribed_processed_pseudogene   | 4,70 | 0         |
| ENSG00000170356 | OR2A20P         | 7  | 144250045 | 144252957 | transcribed_unprocessed_pseudogene | 4,70 | 1,40E-02  |
| ENSG00000270933 | ENSG00000270933 | 7  | 25948657  | 25949403  | lincRNA                            | 4,70 | 0,2161218 |
| ENSG00000271537 | ENSG00000271537 | 7  | 139198557 | 139199142 | processed_pseudogene               | 4,70 | 1,40E-02  |
| ENSG00000272402 | ENSG00000272402 | 6  | 24706747  | 24707151  | antisense                          | 4,70 | 0         |
| ENSG00000249942 | ENSG00000249942 | 4  | 74552584  | 74589481  | antisense                          | 4,70 | 7,06E-02  |
| ENSG00000241439 | ENSG00000241439 | 3  | 125958556 | 125958817 | processed_pseudogene               | 4,70 | 7,06E-02  |
| ENSG00000203684 | IBA57-AS1       | 1  | 228164086 | 228165512 | lincRNA                            | 4,70 | 7,06E-02  |
| ENSG00000229635 | ENSG00000229635 | 1  | 93384487  | 93384998  | processed_pseudogene               | 4,70 | 7,06E-02  |
| ENSG00000233337 | UBE2FP3         | 1  | 111437514 | 111438037 | processed_pseudogene               | 4,70 | 1,40E-02  |
| ENSG00000238061 | ENSG00000238061 | 1  | 185280844 | 185281816 | processed_pseudogene               | 4,70 | 7,06E-02  |
| ENSG00000272068 | ENSG00000272068 | 1  | 156637783 | 156641004 | lincRNA                            | 4,70 | 0         |
| ENSG00000282386 | ENSG00000282386 | 1  | 153964361 | 153965070 | antisense                          | 4,70 | 0         |
| ENSG00000229816 | DDX50P1         | 2  | 32201600  | 32203999  | processed_pseudogene               | 4,69 | 3,30E-03  |
| ENSG00000258655 | ARHGAP5-AS1     | 14 | 32074946  | 32076793  | antisense                          | 4,69 | 6,27E-03  |
| ENSG00000262700 | ENSG00000262700 | 16 | 25093387  | 25095255  | processed_pseudogene               | 4,69 | 3,30E-03  |
| ENSG00000248124 | RRN3P1          | 16 | 21796106  | 21820410  | transcribed_unprocessed_pseudogene | 4,68 | 0         |
| ENSG00000253223 | ENSG00000253223 | 8  | 66984135  | 66986187  | processed_pseudogene               | 4,68 | 0,4332376 |
| ENSG00000182586 | LINC00334       | 21 | 45234340  | 45258730  | lincRNA                            | 4,67 | 0,3565078 |
| ENSG00000278916 | CEP83-AS1       | 12 | 94460003  | 94462484  | lincRNA                            | 4,67 | 6,27E-03  |
| ENSG00000244945 | ENSG00000244945 | 5  | 179595904 | 179603741 | antisense                          | 4,67 | 0         |
| ENSG00000230939 | ENSG00000230939 | 6  | 8784178   | 8785445   | lincRNA                            | 4,65 | 1,95E-02  |
| ENSG00000214293 | APTR            | 7  | 77657660  | 77696265  | lincRNA                            | 4,64 | 0         |
| ENSG00000230330 | HMGN2P3         | 16 | 26032539  | 26032811  | processed_pseudogene               | 4,64 | 0         |
| ENSG00000270061 | ENSG00000270061 | 12 | 123969990 | 123970344 | sense_intronic                     | 4,64 | 6,27E-03  |
| ENSG00000230064 | ENSG00000230064 | 9  | 133338990 | 133339465 | processed_pseudogene               | 4,64 | 0         |
| ENSG00000230257 | NFE4            | 7  | 102973522 | 102988856 | antisense                          | 4,64 | 0         |
| ENSG00000226810 | ENSG00000226810 | 5  | 54857272  | 54858491  | processed_pseudogene               | 4,64 | 0         |
| ENSG00000260179 | ENSG00000260179 | 1  | 1249777   | 1251334   | lincRNA                            | 4,64 | 0,1392851 |
| ENSG00000214826 | DDX12P          | 12 | 9418673   | 9448229   | unprocessed_pseudogene             | 4,62 | 0         |
| ENSG00000229047 | ENSG00000229047 | 21 | 14961309  | 14964233  | antisense                          | 4,61 | 6,27E-03  |
| ENSG00000236852 | ENSG00000236852 | X  | 62779250  | 62780326  | processed_pseudogene               | 4,61 | 0,0358681 |
| ENSG00000278383 | ENSG00000278383 | 20 | 25680781  | 25681246  | antisense                          | 4,60 | 0         |
| ENSG00000268756 | ENSG00000268756 | 19 | 38820166  | 38823223  | antisense                          | 4,60 | 0         |
| ENSG00000268938 | ENSG00000268938 | 19 | 18531613  | 18532632  | antisense                          | 4,60 | 7,06E-02  |
| ENSG00000266401 | ENSG00000266401 | 18 | 3653410   | 3656282   | antisense                          | 4,60 | 0         |
| ENSG00000141028 | CDRT15P1        | 17 | 14024514  | 14025488  | unprocessed_pseudogene             | 4,60 | 0         |
| ENSG00000231595 | ENSG00000231595 | 17 | 14210488  | 14217922  | lincRNA                            | 4,60 | 0         |
| ENSG00000234494 | SP2-AS1         | 17 | 47897330  | 47941410  | antisense                          | 4,60 | 0         |
| ENSG00000262050 | ENSG00000262050 | 17 | 2712309   | 2712833   | antisense                          | 4,60 | 0         |
| ENSG00000275056 | ENSG00000275056 | 16 | 4839244   | 4840334   | sense_intronic                     | 4,60 | 1,40E-02  |
| ENSG00000254398 | ENSG00000254398 | 15 | 28679405  | 28682252  | unprocessed_pseudogene             | 4,60 | 0         |
| ENSG00000270704 | ENSG00000270704 | 15 | 24984864  | 24985173  | sense_intronic                     | 4,60 | 1,40E-02  |
| ENSG00000258233 | ARHGAP42P5      | 14 | 18623852  | 18626787  | processed_pseudogene               | 4,60 | 0         |
| ENSG00000258876 | ENSG00000258876 | 14 | 75970924  | 75971587  | lincRNA                            | 4,60 | 0         |
| ENSG00000213235 | EEF1A1P16       | 12 | 16990670  | 16992083  | processed_pseudogene               | 4,60 | 0         |
| ENSG00000260470 | ENSG00000260470 | 12 | 54145069  | 54147225  | lincRNA                            | 4,60 | 0,2161218 |
| ENSG00000255306 | ENSG00000255306 | 11 | 68024809  | 68030461  | antisense                          | 4,60 | 1,40E-02  |
| ENSG00000270510 | ENSG00000270510 | 11 | 87323709  | 87324359  | processed_pseudogene               | 4,60 | 0         |
| ENSG00000270903 | HNRNPA3P9       | 11 | 32591793  | 32592771  | processed_pseudogene               | 4,60 | 0         |

|                 |                 |    |           |           |                                    |      |           |
|-----------------|-----------------|----|-----------|-----------|------------------------------------|------|-----------|
| ENSG00000178440 | LINC00843       | 10 | 49972763  | 49982053  | lincRNA                            | 4,60 | 0         |
| ENSG00000212743 | ENSG00000212743 | 10 | 6350316   | 6352762   | lincRNA                            | 4,60 | 1,40E-02  |
| ENSG00000229261 | ENSG00000229261 | 10 | 69215333  | 69232490  | antisense                          | 4,60 | 7,06E-02  |
| ENSG00000233081 | ENSG00000233081 | 9  | 91426238  | 91427144  | lincRNA                            | 4,60 | 0         |
| ENSG00000248896 | ENSG00000248896 | 8  | 10729314  | 10771392  | antisense                          | 4,60 | 0         |
| ENSG00000224384 | ENSG00000224384 | 6  | 96785137  | 96795821  | antisense                          | 4,60 | 0         |
| ENSG00000228577 | ENSG00000228577 | 2  | 206606497 | 206609812 | antisense                          | 4,60 | 7,06E-02  |
| ENSG00000235321 | ENSG00000235321 | 2  | 169100743 | 169101210 | antisense                          | 4,60 | 0         |
| ENSG00000236209 | ENSG00000236209 | 2  | 74919555  | 74924846  | lincRNA                            | 4,60 | 7,06E-02  |
| ENSG00000273196 | ENSG00000273196 | 2  | 85387074  | 85387146  | antisense                          | 4,60 | 0         |
| ENSG00000224939 | LINC00184       | 1  | 234629311 | 234634780 | lincRNA                            | 4,60 | 1,40E-02  |
| ENSG00000227533 | SLC2A1-AS1      | 1  | 42959049  | 42983358  | lincRNA                            | 4,60 | 0,2161218 |
| ENSG00000230679 | ENO1-AS1        | 1  | 8878835   | 8879894   | antisense                          | 4,60 | 0         |
| ENSG00000232188 | ENSG00000232188 | 1  | 160931739 | 160934380 | lincRNA                            | 4,60 | 0,2161218 |
| ENSG00000223440 | ENSG00000223440 | 9  | 32633454  | 32648685  | antisense                          | 4,59 | 0         |
| ENSG00000255114 | ENSG00000255114 | 11 | 119044188 | 119045493 | antisense                          | 4,59 | 4,86E-02  |
| ENSG00000233178 | ENSG00000233178 | 9  | 68393881  | 68406500  | antisense                          | 4,58 | 0         |
| ENSG00000231310 | TBL1XR1-AS1     | 3  | 177037405 | 177047923 | antisense                          | 4,58 | 0         |
| ENSG00000273489 | ENSG00000273489 | 7  | 131493964 | 131497694 | antisense                          | 4,58 | 0         |
| ENSG00000258749 | ENSG00000258749 | 14 | 99512501  | 99513576  | antisense                          | 4,57 | 0         |
| ENSG00000272434 | ENSG00000272434 | 3  | 49029316  | 49029706  | antisense                          | 4,56 | 0         |
| ENSG00000227945 | ENSG00000227945 | 6  | 128027886 | 128085248 | antisense                          | 4,56 | 0         |
| ENSG00000255717 | SNHG1           | 11 | 62851988  | 62855914  | processed_transcript               | 4,56 | 0         |
| ENSG00000235919 | ASH1L-AS1       | 1  | 155562042 | 155563944 | antisense                          | 4,56 | 3,30E-03  |
| ENSG00000260136 | ENSG00000260136 | 16 | 23452758  | 23457606  | lincRNA                            | 4,56 | 0         |
| ENSG00000275454 | ENSG00000275454 | 15 | 75639760  | 75640976  | antisense                          | 4,55 | 0         |
| ENSG00000268442 | ENSG00000268442 | 19 | 24162370  | 24163425  | processed_pseudogene               | 4,55 | 0,1836819 |
| ENSG00000227725 | GCOM2           | 4  | 68038544  | 68039647  | processed_pseudogene               | 4,54 | 0         |
| ENSG00000250132 | ENSG00000250132 | 12 | 974133    | 991190    | antisense                          | 4,54 | 0         |
| ENSG00000228288 | PCAT6           | 1  | 202810954 | 202812156 | antisense                          | 4,54 | 4,86E-02  |
| ENSG00000267277 | ENSG00000267277 | 19 | 11368123  | 11374935  | antisense                          | 4,54 | 0         |
| ENSG00000233381 | AK4P3           | 12 | 31615771  | 31616439  | processed_pseudogene               | 4,54 | 0,0358681 |
| ENSG00000256248 | ENSG00000256248 | 12 | 66891876  | 67069162  | lincRNA                            | 4,54 | 1,40E-02  |
| ENSG00000217027 | TPT1P4          | 6  | 144200447 | 144200965 | processed_pseudogene               | 4,52 | 0,2161218 |
| ENSG00000236778 | INTS6-AS1       | 13 | 51452367  | 51552364  | antisense                          | 4,52 | 0         |
| ENSG00000237821 | ENSG00000237821 | 7  | 133169416 | 133170514 | processed_pseudogene               | 4,51 | 0         |
| ENSG00000227695 | DNMBP-AS1       | 10 | 99927010  | 99958381  | antisense                          | 4,51 | 0         |
| ENSG00000236810 | TCEB3-AS1       | 1  | 23760382  | 23778287  | antisense                          | 4,51 | 0         |
| ENSG00000268628 | ENSG00000268628 | 20 | 19756390  | 19758037  | lincRNA                            | 4,50 | 0         |
| ENSG00000205786 | LINC01531       | 19 | 35399511  | 35419385  | lincRNA                            | 4,50 | 0,2161218 |
| ENSG00000267424 | ENSG00000267424 | 19 | 12825711  | 12832983  | antisense                          | 4,50 | 0,2161218 |
| ENSG00000267551 | ENSG00000267551 | 19 | 3141576   | 3155175   | antisense                          | 4,50 | 1,40E-02  |
| ENSG00000269553 | ENSG00000269553 | 19 | 35330843  | 35331920  | sense_intronic                     | 4,50 | 0         |
| ENSG00000267313 | ENSG00000267313 | 18 | 41465783  | 41632185  | lincRNA                            | 4,50 | 7,06E-02  |
| ENSG00000214546 | ENSG00000214546 | 17 | 39619613  | 39622513  | lincRNA                            | 4,50 | 7,06E-02  |
| ENSG00000265845 | ENSG00000265845 | 17 | 28926275  | 28944749  | antisense                          | 4,50 | 0         |
| ENSG00000276250 | ENSG00000276250 | 17 | 30803654  | 30804077  | antisense                          | 4,50 | 0         |
| ENSG00000189149 | CRYM-AS1        | 16 | 21300849  | 21318591  | lincRNA                            | 4,50 | 0         |
| ENSG00000251393 | ENSG00000251393 | 14 | 73462423  | 73477175  | processed_transcript               | 4,50 | 0         |
| ENSG00000274987 | ENSG00000274987 | 12 | 25210652  | 25211233  | antisense                          | 4,50 | 0         |
| ENSG00000224919 | ENSG00000224919 | 10 | 47496212  | 47502195  | antisense                          | 4,50 | 0         |
| ENSG00000242600 | MBL1P           | 10 | 79904898  | 79950336  | unitary_pseudogene                 | 4,50 | 0         |
| ENSG00000249456 | ENSG00000249456 | 10 | 124917143 | 124942881 | sense_overlapping                  | 4,50 | 7,06E-02  |
| ENSG00000271816 | ENSG00000271816 | 10 | 73699151  | 73730487  | processed_transcript               | 4,50 | 1,40E-02  |
| ENSG00000182487 | NCF1B           | 7  | 73220624  | 73235945  | transcribed_unprocessed_pseudogene | 4,50 | 7,06E-02  |
| ENSG00000239911 | PRKAG2-AS1      | 7  | 151877042 | 151879223 | antisense                          | 4,50 | 0         |
| ENSG00000241269 | ENSG00000241269 | 7  | 5419827   | 5420767   | antisense                          | 4,50 | 7,06E-02  |
| ENSG00000230433 | ENSG00000230433 | 6  | 524171    | 525581    | antisense                          | 4,50 | 0,2161218 |
| ENSG00000229666 | MAST4-AS1       | 5  | 67001383  | 67003953  | antisense                          | 4,50 | 1,40E-02  |
| ENSG00000248489 | ENSG00000248489 | 5  | 98929171  | 98995013  | lincRNA                            | 4,50 | 0,2161218 |

|                 |                 |    |           |           |                                    |      |           |
|-----------------|-----------------|----|-----------|-----------|------------------------------------|------|-----------|
| ENSG00000250848 | ENSG00000250848 | 5  | 288833    | 290321    | processed_pseudogene               | 4,50 | 0         |
| ENSG00000180610 | ZBTB12P1        | 4  | 39770081  | 39771371  | processed_pseudogene               | 4,50 | 0         |
| ENSG00000189196 | LINC00994       | 3  | 64078361  | 64087363  | lincRNA                            | 4,50 | 7,06E-02  |
| ENSG00000213450 | VDAC1P7         | 3  | 77316752  | 77317598  | processed_pseudogene               | 4,50 | 0         |
| ENSG00000239503 | MARK2P8         | 3  | 128748538 | 128749489 | processed_pseudogene               | 4,50 | 0         |
| ENSG00000239994 | ENSG00000239994 | 3  | 119744139 | 119750350 | antisense                          | 4,50 | 0         |
| ENSG00000269894 | ENSG00000269894 | 3  | 9935706   | 9936258   | sense_intronic                     | 4,50 | 7,06E-02  |
| ENSG00000270059 | ENSG00000270059 | 3  | 65359268  | 65359717  | sense_intronic                     | 4,50 | 0         |
| ENSG00000235369 | RPL36AP15       | 2  | 47797826  | 47798091  | processed_pseudogene               | 4,50 | 7,06E-02  |
| ENSG00000279220 | GPR1-AS         | 2  | 206203376 | 206266243 | processed_transcript               | 4,50 | 0         |
| ENSG00000277007 | ENSG00000277007 | 1  | 219270774 | 219273387 | lincRNA                            | 4,50 | 1,40E-02  |
| ENSG00000226107 | ENSG00000226107 | X  | 134522702 | 134522990 | processed_pseudogene               | 4,50 | 1,40E-02  |
| ENSG00000258114 | ENSG00000258114 | 10 | 117425194 | 117490419 | lincRNA                            | 4,49 | 0         |
| ENSG00000233369 | GTF2IP4         | 7  | 73154938  | 73207283  | transcribed_processed_pseudogene   | 4,48 | 0         |
| ENSG00000240356 | RPL23AP7        | 2  | 113610502 | 113627090 | transcribed_processed_pseudogene   | 4,46 | 0         |
| ENSG00000233903 | ENSG00000233903 | 22 | 42276355  | 42277052  | lincRNA                            | 4,45 | 0         |
| ENSG00000230358 | SPDYE21P        | 7  | 67279778  | 67286230  | unprocessed_pseudogene             | 4,45 | 0         |
| ENSG00000266865 | ENSG00000266865 | 17 | 31008497  | 31093127  | transcribed_unprocessed_pseudogene | 4,44 | 0         |
| ENSG00000268658 | LINC00664       | 19 | 21483374  | 21503238  | lincRNA                            | 4,43 | 0         |
| ENSG00000254719 | ENSG00000254719 | 11 | 10272052  | 10272259  | processed_pseudogene               | 4,42 | 0         |
| ENSG00000224861 | YBX1P1          | 14 | 66012830  | 66013789  | processed_pseudogene               | 4,42 | 0         |
| ENSG00000256512 | ENSG00000256512 | 12 | 27798641  | 27800708  | antisense                          | 4,41 | 0         |
| ENSG00000217702 | ENSG00000217702 | 2  | 74130583  | 74135395  | lincRNA                            | 4,41 | 0,2746192 |
| ENSG00000234983 | ENSG00000234983 | 7  | 42918741  | 42920084  | processed_pseudogene               | 4,41 | 7,06E-02  |
| ENSG00000214552 | COPS8P2         | 3  | 68145004  | 68145630  | processed_pseudogene               | 4,41 | 3,30E-03  |
| ENSG00000204637 | ENSG00000204637 | 2  | 100509277 | 100509612 | processed_pseudogene               | 4,40 | 0         |
| ENSG00000229728 | ENSG00000229728 | 20 | 1361622   | 1362585   | antisense                          | 4,40 | 1,40E-02  |
| ENSG00000237595 | ENSG00000237595 | 20 | 50162765  | 50166102  | lincRNA                            | 4,40 | 0,2161218 |
| ENSG00000268518 | ENSG00000268518 | 19 | 50486810  | 50487638  | lincRNA                            | 4,40 | 7,06E-02  |
| ENSG00000269397 | ENSG00000269397 | 19 | 23927788  | 23929287  | sense_intronic                     | 4,40 | 0,2161218 |
| ENSG00000264825 | ENSG00000264825 | 18 | 22213778  | 22228029  | lincRNA                            | 4,40 | 0,2161218 |
| ENSG00000264843 | ENSG00000264843 | 18 | 10704297  | 10709599  | antisense                          | 4,40 | 0         |
| ENSG00000270469 | ENSG00000270469 | 18 | 14053951  | 14054761  | processed_pseudogene               | 4,40 | 0,2161218 |
| ENSG00000213373 | LINC00671       | 17 | 42874670  | 42898704  | lincRNA                            | 4,40 | 0,2161218 |
| ENSG00000265060 | PPY2P           | 17 | 28247444  | 28248289  | transcribed_unprocessed_pseudogene | 4,40 | 0         |
| ENSG00000267546 | ENSG00000267546 | 17 | 76545668  | 76557683  | antisense                          | 4,40 | 7,06E-02  |
| ENSG00000270993 | ENSG00000270993 | 17 | 75060491  | 75060620  | processed_pseudogene               | 4,40 | 7,06E-02  |
| ENSG00000261527 | ENSG00000261527 | 16 | 69443240  | 69444290  | processed_pseudogene               | 4,40 | 0,2161218 |
| ENSG00000242085 | RPS20P33        | 14 | 105374618 | 105374971 | processed_pseudogene               | 4,40 | 0         |
| ENSG00000256894 | ENSG00000256894 | 12 | 26125155  | 26126617  | antisense                          | 4,40 | 0         |
| ENSG00000276261 | ENSG00000276261 | 12 | 27700066  | 27700574  | antisense                          | 4,40 | 7,06E-02  |
| ENSG00000271584 | ENSG00000271584 | 11 | 111091932 | 111097357 | lincRNA                            | 4,40 | 0         |
| ENSG00000233665 | ENSG00000233665 | 10 | 48976554  | 48993046  | processed_transcript               | 4,40 | 0         |
| ENSG00000270427 | NRBF2P5         | 10 | 5776071   | 5776858   | processed_pseudogene               | 4,40 | 1,40E-02  |
| ENSG00000270767 | ENSG00000270767 | 10 | 44488335  | 44488445  | processed_pseudogene               | 4,40 | 1,40E-02  |
| ENSG00000272572 | ENSG00000272572 | 10 | 100911103 | 100912739 | antisense                          | 4,40 | 1,40E-02  |
| ENSG00000272914 | ENSG00000272914 | 10 | 30831828  | 30833387  | sense_intronic                     | 4,40 | 1,40E-02  |
| ENSG00000230225 | MTND5P14        | 9  | 5109496   | 5110762   | unprocessed_pseudogene             | 4,40 | 0         |
| ENSG00000253258 | ENSG00000253258 | 8  | 123181638 | 123182788 | antisense                          | 4,40 | 7,06E-02  |
| ENSG00000272010 | ENSG00000272010 | 8  | 65591850  | 65592472  | lincRNA                            | 4,40 | 7,06E-02  |
| ENSG00000231170 | ENSG00000231170 | 7  | 95596682  | 95613719  | antisense                          | 4,40 | 0         |
| ENSG00000233025 | CRYZP1          | 7  | 103088664 | 103089610 | processed_pseudogene               | 4,40 | 0         |
| ENSG00000261019 | ENSG00000261019 | 7  | 42901272  | 42902639  | lincRNA                            | 4,40 | 0         |
| ENSG00000216809 | ENSG00000216809 | 6  | 118452469 | 118454992 | processed_pseudogene               | 4,40 | 0         |
| ENSG00000250056 | LINC01018       | 5  | 6582136   | 6588499   | lincRNA                            | 4,40 | 0         |

|                 |                 |    |           |           |                                    |      |           |
|-----------------|-----------------|----|-----------|-----------|------------------------------------|------|-----------|
| ENSG00000253295 | ENSG00000253295 | 5  | 172758226 | 172762556 | antisense                          | 4,40 | 7,06E-02  |
| ENSG00000261360 | ENSG00000261360 | 5  | 14661808  | 14664604  | antisense                          | 4,40 | 0,2161218 |
| ENSG00000279727 | ENSG00000279727 | 3  | 36819276  | 36822498  | lincRNA                            | 4,40 | 1,40E-02  |
| ENSG00000223382 | ENSG00000223382 | 1  | 30824228  | 30834431  | lincRNA                            | 4,40 | 7,06E-02  |
| ENSG00000230699 | ENSG00000230699 | 1  | 911435    | 914948    | lincRNA                            | 4,40 | 7,06E-02  |
| ENSG00000233396 | ENSG00000233396 | 1  | 146052566 | 146061948 | lincRNA                            | 4,40 | 0         |
| ENSG00000279049 | ENSG00000279049 | 1  | 54099968  | 54100224  | pseudogene                         | 4,40 | 0         |
| ENSG00000271360 | ENSG00000271360 | 10 | 11611305  | 11612227  | antisense                          | 4,38 | 0         |
| ENSG00000250794 | ALG1L12P        | 8  | 12421032  | 12425000  | unprocessed_pseudogene             | 4,38 | 0         |
| ENSG00000225434 | LINC01504       | 9  | 72305430  | 72343210  | lincRNA                            | 4,38 | 3,30E-03  |
| ENSG00000255234 | ENSG00000255234 | 11 | 83286128  | 83423516  | antisense                          | 4,38 | 0         |
| ENSG00000248873 | SERBP1P6        | 5  | 42465400  | 42468868  | processed_pseudogene               | 4,38 | 0         |
| ENSG00000214249 | CTAGE11P        | 13 | 75237944  | 75240296  | processed_pseudogene               | 4,37 | 0         |
| ENSG00000224953 | SRIP3           | X  | 6718962   | 6719180   | processed_pseudogene               | 4,37 | 4,86E-02  |
| ENSG00000256283 | METTL8P1        | 12 | 15255213  | 15255823  | processed_pseudogene               | 4,37 | 0         |
| ENSG00000273138 | ENSG00000273138 | 7  | 95416108  | 95416462  | antisense                          | 4,37 | 0         |
| ENSG00000255507 | ENSG00000255507 | 11 | 75803431  | 75815406  | antisense                          | 4,36 | 0         |
| ENSG00000231028 | LINC00271       | 6  | 135497801 | 135716055 | lincRNA                            | 4,36 | 0         |
| ENSG00000215873 | FEN1P1          | 1  | 91328369  | 91329513  | processed_pseudogene               | 4,36 | 3,30E-03  |
| ENSG00000239335 | LLPH-AS1        | 12 | 66130751  | 66134449  | antisense                          | 4,36 | 0         |
| ENSG00000266677 | ENSG00000266677 | 17 | 18172625  | 18184753  | antisense                          | 4,35 | 0         |
| ENSG00000196810 | CTBP1-AS2       | 4  | 1249300   | 1288291   | antisense                          | 4,35 | 0         |
| ENSG00000269235 | ZNF350-AS1      | 19 | 51949134  | 51981367  | antisense                          | 4,33 | 6,27E-03  |
| ENSG00000275560 | ENSG00000275560 | 12 | 12718973  | 12719521  | sense_intronic                     | 4,33 | 0         |
| ENSG00000259709 | ENSG00000259709 | 15 | 52124561  | 52140246  | antisense                          | 4,33 | 0         |
| ENSG00000228797 | FAM207BP        | 13 | 18697003  | 18697507  | processed_pseudogene               | 4,33 | 0         |
| ENSG00000267575 | ENSG00000267575 | 19 | 27793463  | 27918863  | lincRNA                            | 4,33 | 0         |
| ENSG00000269583 | ENSG00000269583 | 19 | 43574638  | 43575618  | antisense                          | 4,32 | 0         |
| ENSG00000231770 | TMEM44-AS1      | 3  | 194584011 | 194590260 | antisense                          | 4,32 | 0         |
| ENSG00000269939 | ENSG00000269939 | 11 | 83185521  | 83187036  | lincRNA                            | 4,32 | 7,06E-02  |
| ENSG00000259834 | ENSG00000259834 | 1  | 110653560 | 110657040 | lincRNA                            | 4,32 | 0         |
| ENSG00000215302 | ENSG00000215302 | 15 | 30470779  | 30507623  | transcribed_unprocessed_pseudogene | 4,31 | 0         |
| ENSG00000236662 | ENSG00000236662 | 10 | 100980507 | 100985614 | antisense                          | 4,31 | 0         |
| ENSG00000242748 | RPL23AP81       | 20 | 41196691  | 41197157  | transcribed_processed_pseudogene   | 4,30 | 7,06E-02  |
| ENSG00000263797 | ENSG00000263797 | 18 | 6873399   | 6875024   | antisense                          | 4,30 | 0         |
| ENSG00000265791 | ENSG00000265791 | 17 | 30781493  | 30782221  | sense_intronic                     | 4,30 | 7,06E-02  |
| ENSG00000237718 | ENSG00000237718 | 16 | 67614381  | 67616146  | antisense                          | 4,30 | 0         |
| ENSG00000272808 | ENSG00000272808 | 15 | 100849831 | 100865457 | processed_transcript               | 4,30 | 7,06E-02  |
| ENSG00000232587 | EEF1A1P3        | 13 | 28214513  | 28215897  | processed_pseudogene               | 4,30 | 0,2161218 |
| ENSG00000232977 | LINC00327       | 13 | 23466571  | 23487464  | lincRNA                            | 4,30 | 0         |
| ENSG00000226472 | ENSG00000226472 | 12 | 30978308  | 31006010  | antisense                          | 4,30 | 7,06E-02  |
| ENSG00000256897 | ENSG00000256897 | 11 | 47220218  | 47221751  | antisense                          | 4,30 | 1,40E-02  |
| ENSG00000226393 | IFNA20P         | 9  | 21321300  | 21321827  | unprocessed_pseudogene             | 4,30 | 0         |
| ENSG00000239392 | ENSG00000239392 | 9  | 34133157  | 34134696  | processed_pseudogene               | 4,30 | 0         |
| ENSG00000213542 | ENSG00000213542 | 7  | 77115399  | 77116192  | processed_pseudogene               | 4,30 | 0         |
| ENSG00000260418 | ENSG00000260418 | 6  | 136335714 | 136336087 | lincRNA                            | 4,30 | 7,06E-02  |
| ENSG00000241907 | RPS20P4         | 5  | 150021567 | 150021921 | processed_pseudogene               | 4,30 | 0         |
| ENSG00000250337 | LINC01021       | 5  | 27472292  | 27496401  | lincRNA                            | 4,30 | 0         |
| ENSG00000251131 | ENSG00000251131 | 5  | 43018429  | 43024247  | antisense                          | 4,30 | 0         |
| ENSG00000269921 | ENSG00000269921 | 4  | 56387625  | 56388153  | lincRNA                            | 4,30 | 0,2161218 |
| ENSG00000213943 | KRT18P17        | 3  | 12787393  | 12788671  | processed_pseudogene               | 4,30 | 0         |
| ENSG00000242992 | FTH1P4          | 3  | 128764466 | 128765018 | processed_pseudogene               | 4,30 | 7,06E-02  |
| ENSG00000228431 | ARL5AP3         | 1  | 68049360  | 68049745  | processed_pseudogene               | 4,30 | 0         |
| ENSG00000273026 | ENSG00000273026 | 1  | 153966516 | 153966930 | antisense                          | 4,30 | 7,06E-02  |
| ENSG00000214207 | KRT18P10        | X  | 5573145   | 5574431   | processed_pseudogene               | 4,30 | 0         |
| ENSG00000233250 | ENSG00000233250 | X  | 53432722  | 53433032  | antisense                          | 4,30 | 7,06E-02  |
| ENSG00000250995 | ENSG00000250995 | X  | 118769796 | 118770857 | processed_pseudogene               | 4,30 | 0         |

|                 |                 |    |           |           |                                        |      |           |
|-----------------|-----------------|----|-----------|-----------|----------------------------------------|------|-----------|
| ENSG00000214199 | EEF1A1P12       | 2  | 106697331 | 106698676 | processed_pseudogene                   | 4,30 | 7,06E-02  |
| ENSG00000277782 | ENSG00000277782 | 15 | 80999593  | 80999981  | lincRNA                                | 4,29 | 0         |
| ENSG00000270966 | ENSG00000270966 | 8  | 8933721   | 8934006   | processed_pseudogene                   | 4,29 | 3,30E-03  |
| ENSG00000203288 | ENSG00000203288 | 1  | 151790804 | 151794402 | antisense                              | 4,29 | 4,86E-02  |
| ENSG00000183666 | GUSBP1          | 5  | 21341833  | 21589372  | transcribed_unprocess<br>ed_pseudogene | 4,28 | 0         |
| ENSG00000185065 | ENSG00000185065 | 22 | 19447893  | 19450105  | antisense                              | 4,28 | 1,40E-02  |
| ENSG00000266907 | ENSG00000266907 | 19 | 56319790  | 56322310  | processed_pseudogene                   | 4,28 | 0         |
| ENSG00000249889 | ALG1L1P         | 8  | 12178697  | 12182719  | unprocessed_pseudoge<br>ne             | 4,27 | 3,30E-03  |
| ENSG00000224331 | ENSG00000224331 | 2  | 164687287 | 164687596 | processed_pseudogene                   | 4,27 | 0,1836819 |
| ENSG00000260329 | ENSG00000260329 | 12 | 106954029 | 106955497 | antisense                              | 4,27 | 0         |
| ENSG00000272418 | ENSG00000272418 | 15 | 78280950  | 78282190  | sense_intronic                         | 4,26 | 6,27E-03  |
| ENSG00000257038 | ENSG00000257038 | 11 | 73307235  | 73309361  | antisense                              | 4,26 | 0         |
| ENSG00000223374 | ENSG00000223374 | 2  | 241351340 | 241353104 | antisense                              | 4,25 | 0         |
| ENSG00000214380 | ENSG00000214380 | 3  | 109915976 | 109916940 | processed_pseudogene                   | 4,25 | 0,1836819 |
| ENSG00000230046 | BIRC6-AS1       | 2  | 32377631  | 32379599  | antisense                              | 4,24 | 0         |
| ENSG00000277914 | DDX6P2          | 13 | 86275493  | 86277262  | processed_pseudogene                   | 4,24 | 3,30E-03  |
| ENSG00000271806 | ENSG00000271806 | 1  | 2141084   | 2145279   | antisense                              | 4,23 | 0         |
| ENSG00000266490 | ENSG00000266490 | 17 | 30792372  | 30792833  | lincRNA                                | 4,23 | 0         |
| ENSG00000234322 | ST13P18         | X  | 93287733  | 93288759  | processed_pseudogene                   | 4,22 | 0,2161218 |
| ENSG00000240024 | LINC00888       | 3  | 183447608 | 183456013 | transcribed_unprocess<br>ed_pseudogene | 4,21 | 3,30E-03  |
| ENSG00000263878 | DLGAP1-AS4      | 18 | 3962353   | 4013943   | antisense                              | 4,20 | 7,06E-02  |
| ENSG00000263657 | ENSG00000263657 | 17 | 29761103  | 29787836  | antisense                              | 4,20 | 0         |
| ENSG00000205037 | ENSG00000205037 | 16 | 88088041  | 88100985  | lincRNA                                | 4,20 | 0         |
| ENSG00000260038 | ENSG00000260038 | 16 | 57247350  | 57248492  | sense_intronic                         | 4,20 | 7,06E-02  |
| ENSG00000270165 | ENSG00000270165 | 16 | 67738588  | 67739922  | sense_intronic                         | 4,20 | 0         |
| ENSG00000275040 | ENSG00000275040 | 16 | 79619469  | 79620110  | lincRNA                                | 4,20 | 0,2161218 |
| ENSG00000275673 | ENSG00000275673 | 16 | 10934258  | 10934887  | sense_intronic                         | 4,20 | 0         |
| ENSG00000278434 | ENSG00000278434 | 16 | 4532216   | 4533670   | sense_intronic                         | 4,20 | 1,40E-02  |
| ENSG00000246548 | ENSG00000246548 | 14 | 77041064  | 77069503  | lincRNA                                | 4,20 | 1,40E-02  |
| ENSG00000276957 | ENSG00000276957 | 13 | 102593338 | 102593873 | lincRNA                                | 4,20 | 0,2161218 |
| ENSG00000233560 | KRT8P39         | 12 | 68705634  | 68707066  | processed_pseudogene                   | 4,20 | 7,06E-02  |
| ENSG00000254427 | ENSG00000254427 | 11 | 45355371  | 45366121  | lincRNA                                | 4,20 | 7,06E-02  |
| ENSG00000255227 | ENSG00000255227 | 11 | 29445487  | 29457393  | lincRNA                                | 4,20 | 0,2161218 |
| ENSG00000260475 | ENSG00000260475 | 10 | 99621055  | 99621918  | lincRNA                                | 4,20 | 0         |
| ENSG00000267834 | ENSG00000267834 | 9  | 129004502 | 129004998 | lincRNA                                | 4,20 | 7,06E-02  |
| ENSG00000276462 | ENSG00000276462 | 9  | 41100794  | 41106229  | lincRNA                                | 4,20 | 7,06E-02  |
| ENSG00000254533 | ENSG00000254533 | 8  | 144698614 | 144699185 | lincRNA                                | 4,20 | 1,40E-02  |
| ENSG00000213385 | ENSG00000213385 | 7  | 102755146 | 102755939 | processed_pseudogene                   | 4,20 | 7,06E-02  |
| ENSG00000228019 | ENSG00000228019 | 7  | 67307605  | 67308356  | unprocessed_pseudoge<br>ne             | 4,20 | 1,40E-02  |
| ENSG00000231359 | ENSG00000231359 | 7  | 6490793   | 6491098   | processed_pseudogene                   | 4,20 | 0,2161218 |
| ENSG00000236861 | ENSG00000236861 | 7  | 93969442  | 94011113  | antisense                              | 4,20 | 7,06E-02  |
| ENSG00000277053 | GTF2IP1         | 7  | 75185385  | 75237696  | transcribed_unprocess<br>ed_pseudogene | 4,20 | 0         |
| ENSG00000220305 | HNRNP1P1        | 6  | 159712801 | 159713985 | processed_pseudogene                   | 4,20 | 7,06E-02  |
| ENSG00000260604 | ENSG00000260604 | 6  | 3904920   | 3911979   | lincRNA                                | 4,20 | 1,40E-02  |
| ENSG00000261211 | ENSG00000261211 | 6  | 6680309   | 6683633   | lincRNA                                | 4,20 | 7,06E-02  |
| ENSG00000248590 | GLDCP1          | 4  | 56593004  | 56595681  | transcribed_processed_<br>pseudogene   | 4,20 | 0         |
| ENSG00000272498 | ENSG00000272498 | 3  | 16339308  | 16339871  | antisense                              | 4,20 | 0         |
| ENSG00000235586 | ENSG00000235586 | 2  | 38601598  | 38602178  | antisense                              | 4,20 | 0         |
| ENSG00000224238 | WARS2-IT1       | 1  | 119047405 | 119064785 | antisense                              | 4,20 | 0         |
| ENSG00000229509 | ENSG00000229509 | 1  | 206333327 | 206333438 | unprocessed_pseudoge<br>ne             | 4,20 | 1,40E-02  |
| ENSG00000260281 | ITFG1-AS1       | 16 | 47144323  | 47162747  | antisense                              | 4,19 | 0         |
| ENSG00000247473 | CARS-AS1        | 11 | 3029009   | 3041260   | antisense                              | 4,18 | 0         |
| ENSG00000227627 | ENSG00000227627 | 6  | 152983750 | 152989223 | antisense                              | 4,18 | 0         |
| ENSG00000273483 | ENSG00000273483 | 1  | 112517799 | 112518441 | antisense                              | 4,18 | 0,4332376 |



|                 |                 |    |           |           |                                    |      |           |
|-----------------|-----------------|----|-----------|-----------|------------------------------------|------|-----------|
| ENSG00000227621 | PHBP11          | 1  | 223856579 | 223857387 | processed_pseudogene               | 4,18 | 0         |
| ENSG00000182057 | OGFRP1          | 22 | 42269753  | 42275196  | lincRNA                            | 4,17 | 6,27E-03  |
| ENSG00000273061 | CDC37L1-AS1     | 9  | 4676600   | 4679502   | lincRNA                            | 4,17 | 9,18E-02  |
| ENSG00000227542 | ENSG00000227542 | 2  | 191229165 | 191246172 | lincRNA                            | 4,17 | 0         |
| ENSG00000231198 | ENSG00000231198 | 7  | 39833286  | 39833793  | processed_pseudogene               | 4,16 | 0         |
| ENSG00000213683 | ENSG00000213683 | 22 | 50754675  | 50755434  | processed_pseudogene               | 4,15 | 0         |
| ENSG00000253384 | ENSG00000253384 | 8  | 18088569  | 18089687  | processed_pseudogene               | 4,13 | 0         |
| ENSG00000226400 | ENSG00000226400 | 5  | 28927029  | 28927284  | processed_pseudogene               | 4,13 | 0         |
| ENSG00000235339 | GEMIN2P2        | 3  | 41977008  | 41978034  | processed_pseudogene               | 4,13 | 0,2746192 |
| ENSG00000230793 | SMARCE1P5       | 13 | 44594858  | 44596082  | processed_pseudogene               | 4,12 | 1,40E-02  |
| ENSG00000258297 | ENSG00000258297 | 11 | 66666036  | 66668374  | antisense                          | 4,12 | 2,95E-02  |
| ENSG00000249485 | RBBP4P1         | 5  | 14797125  | 14798400  | processed_pseudogene               | 4,10 | 0         |
| ENSG00000228107 | ENSG00000228107 | 21 | 36360630  | 36362040  | sense_overlapping                  | 4,10 | 0         |
| ENSG00000268355 | ENSG00000268355 | 19 | 41531206  | 41532174  | lincRNA                            | 4,10 | 0         |
| ENSG00000273733 | ENSG00000273733 | 19 | 11221083  | 11221573  | antisense                          | 4,10 | 7,06E-02  |
| ENSG00000226101 | ENSG00000226101 | 17 | 72072333  | 72093481  | lincRNA                            | 4,10 | 1,40E-02  |
| ENSG00000250107 | CACNA1G-AS1     | 17 | 50556207  | 50562108  | antisense                          | 4,10 | 1,40E-02  |
| ENSG00000264016 | ENSG00000264016 | 17 | 10741267  | 10769016  | lincRNA                            | 4,10 | 0         |
| ENSG00000275897 | ENSG00000275897 | 17 | 50475819  | 50478391  | lincRNA                            | 4,10 | 7,06E-02  |
| ENSG00000259895 | ENSG00000259895 | 16 | 2464950   | 2468213   | antisense                          | 4,10 | 0,2161218 |
| ENSG00000273615 | ENSG00000273615 | 16 | 54851640  | 54852733  | lincRNA                            | 4,10 | 7,06E-02  |
| ENSG00000230724 | LINC01001       | 11 | 127204    | 139612    | lincRNA                            | 4,10 | 0         |
| ENSG00000269038 | ENSG00000269038 | 11 | 64778954  | 64779405  | lincRNA                            | 4,10 | 7,06E-02  |
| ENSG00000271848 | ENSG00000271848 | 10 | 73654039  | 73674719  | antisense                          | 4,10 | 0         |
| ENSG00000249491 | EGFLAM-AS1      | 5  | 38425036  | 38427376  | antisense                          | 4,10 | 0         |
| ENSG00000250015 | ENSG00000250015 | 5  | 116302354 | 116304134 | lincRNA                            | 4,10 | 0         |
| ENSG00000272239 | ENSG00000272239 | 5  | 147401760 | 147401996 | antisense                          | 4,10 | 1,40E-02  |
| ENSG00000240668 | KRT8P36         | 3  | 138101478 | 138102917 | processed_pseudogene               | 4,10 | 1,40E-02  |
| ENSG00000241634 | ENSG00000241634 | 3  | 108543367 | 108543875 | processed_pseudogene               | 4,10 | 0         |
| ENSG00000205716 | FAM183DP        | 2  | 102249857 | 102250255 | processed_pseudogene               | 4,10 | 0,2161218 |
| ENSG00000232377 | ENSG00000232377 | 2  | 143937073 | 143964156 | antisense                          | 4,10 | 0         |
| ENSG00000232485 | ENSG00000232485 | 2  | 216479030 | 216498761 | processed_transcript               | 4,10 | 0         |
| ENSG00000237624 | OXCT2P1         | 1  | 39514956  | 39516490  | unprocessed_pseudogene             | 4,10 | 0         |
| ENSG00000234036 | TXNP6           | 4  | 76958860  | 76959169  | processed_pseudogene               | 4,10 | 0,2161218 |
| ENSG00000237263 | MAPK6PS3        | 13 | 42068932  | 42071093  | processed_pseudogene               | 4,10 | 0         |
| ENSG00000260776 | ENSG00000260776 | 15 | 77914217  | 77926846  | transcribed_unprocessed_pseudogene | 4,09 | 3,30E-03  |
| ENSG00000270919 | ENSG00000270919 | 15 | 80580029  | 80580566  | antisense                          | 4,09 | 6,27E-03  |
| ENSG00000272150 | NBPF25P         | 1  | 145572345 | 145607858 | transcribed_unprocessed_pseudogene | 4,09 | 0         |
| ENSG00000256299 | ENSG00000256299 | 12 | 130810821 | 130812622 | lincRNA                            | 4,08 | 0,0358681 |
| ENSG00000233892 | PAIP1P1         | 6  | 30186798  | 30188614  | processed_pseudogene               | 4,08 | 6,27E-03  |
| ENSG00000272510 | ENSG00000272510 | 1  | 15565611  | 15565956  | antisense                          | 4,08 | 0         |
| ENSG00000232344 | ENSG00000232344 | 17 | 18010643  | 18011822  | processed_pseudogene               | 4,08 | 0         |
| ENSG00000271795 | ENSG00000271795 | 5  | 151509453 | 151512769 | antisense                          | 4,07 | 0,4036702 |
| ENSG00000259375 | ENSG00000259375 | 15 | 85579046  | 85580178  | antisense                          | 4,05 | 0         |
| ENSG00000257494 | ENSG00000257494 | 12 | 112256800 | 112259091 | antisense                          | 4,05 | 0         |
| ENSG00000274292 | ENSG00000274292 | 12 | 121800797 | 121803403 | lincRNA                            | 4,05 | 7,06E-02  |
| ENSG00000255817 | ENSG00000255817 | 12 | 64108763  | 64120489  | antisense                          | 4,05 | 0         |
| ENSG00000229852 | ENSG00000229852 | 6  | 73263215  | 73301401  | antisense                          | 4,04 | 1,95E-02  |
| ENSG00000261654 | ENSG00000261654 | 1  | 110936369 | 110942353 | sense_overlapping                  | 4,04 | 0         |
| ENSG00000237296 | SMG1P1          | 16 | 22437008  | 22492220  | transcribed_unprocessed_pseudogene | 4,04 | 0         |
| ENSG00000248880 | ICE2P1          | 4  | 188387471 | 188389666 | processed_pseudogene               | 4,04 | 2,21E-02  |
| ENSG00000225422 | RBMS1P1         | 12 | 66234079  | 66235234  | processed_pseudogene               | 4,04 | 0         |
| ENSG00000251333 | RTN3P1          | 4  | 145375543 | 145376253 | processed_pseudogene               | 4,04 | 0         |
| ENSG00000259234 | ANKRD34C-AS1    | 15 | 79191707  | 79283945  | lincRNA                            | 4,04 | 1,40E-02  |
| ENSG00000259010 | ENSG00000259010 | 14 | 64600243  | 64601644  | processed_pseudogene               | 4,03 | 0         |
| ENSG00000224985 | ENSG00000224985 | 1  | 161153760 | 161159349 | antisense                          | 4,03 | 0         |
| ENSG00000261317 | ENSG00000261317 | 16 | 89969791  | 89972544  | antisense                          | 4,03 | 0         |

|                 |                 |    |           |           |                                  |      |           |
|-----------------|-----------------|----|-----------|-----------|----------------------------------|------|-----------|
| ENSG00000133136 | GNP5P2          | X  | 110346703 | 110346909 | processed_pseudogene             | 4,03 | 0,1836819 |
| ENSG00000233799 | ENSG00000233799 | 4  | 764487    | 765074    | antisense                        | 4,02 | 0         |
| ENSG00000224856 | ENSG00000224856 | 22 | 43957027  | 43957348  | processed_pseudogene             | 4,02 | 0,1836819 |
| ENSG00000216895 | ENSG00000216895 | 7  | 155611231 | 155645205 | antisense                        | 4,02 | 0         |
| ENSG00000254898 | ENSG00000254898 | 8  | 38335981  | 38337551  | antisense                        | 4,02 | 0         |
| ENSG00000244723 | ASLP1           | 22 | 23649213  | 23653334  | unprocessed_pseudogene           | 4,00 | 7,06E-02  |
| ENSG00000273342 | ENSG00000273342 | 22 | 21640844  | 21641284  | lincRNA                          | 4,00 | 7,06E-02  |
| ENSG00000227698 | ENSG00000227698 | 21 | 41874756  | 41877613  | sense_intronic                   | 4,00 | 1,40E-02  |
| ENSG00000232680 | ENSG00000232680 | 19 | 35432957  | 35434642  | lincRNA                          | 4,00 | 0,2161218 |
| ENSG00000269815 | ENSG00000269815 | 19 | 17296196  | 17296695  | sense_intronic                   | 4,00 | 1,40E-02  |
| ENSG00000273791 | ENSG00000273791 | 19 | 19908268  | 19909146  | unprocessed_pseudogene           | 4,00 | 0,2161218 |
| ENSG00000263982 | ENSG00000263982 | 18 | 76372717  | 76378275  | antisense                        | 4,00 | 0         |
| ENSG00000262052 | ENSG00000262052 | 17 | 55842677  | 55872939  | lincRNA                          | 4,00 | 1,40E-02  |
| ENSG00000267203 | SNRPGP4         | 17 | 69318733  | 69318961  | processed_pseudogene             | 4,00 | 0         |
| ENSG00000277589 | ENSG00000277589 | 17 | 36998598  | 37000034  | sense_intronic                   | 4,00 | 7,06E-02  |
| ENSG00000260750 | ENSG00000260750 | 16 | 87492555  | 87515635  | lincRNA                          | 4,00 | 1,40E-02  |
| ENSG00000260816 | ENSG00000260816 | 16 | 78895361  | 78899644  | sense_intronic                   | 4,00 | 0,2161218 |
| ENSG00000261519 | ENSG00000261519 | 16 | 66549280  | 66551189  | lincRNA                          | 4,00 | 0         |
| ENSG00000245975 | ENSG00000245975 | 15 | 58768072  | 58770974  | lincRNA                          | 4,00 | 0         |
| ENSG00000259645 | ENSG00000259645 | 15 | 69391192  | 69392149  | sense_intronic                   | 4,00 | 7,06E-02  |
| ENSG00000261229 | ENSG00000261229 | 15 | 79843547  | 79844304  | lincRNA                          | 4,00 | 0         |
| ENSG00000259158 | ADAM20P1        | 14 | 70468881  | 70483756  | lincRNA                          | 4,00 | 7,06E-02  |
| ENSG00000255882 | ENSG00000255882 | 12 | 9867027   | 9869808   | antisense                        | 4,00 | 0         |
| ENSG00000257298 | ENSG00000257298 | 12 | 50185580  | 50191363  | sense_intronic                   | 4,00 | 0         |
| ENSG00000258230 | ENSG00000258230 | 12 | 101773114 | 101773755 | transcribed_processed_pseudogene | 4,00 | 7,06E-02  |
| ENSG00000275389 | ENSG00000275389 | 12 | 124085761 | 124088598 | lincRNA                          | 4,00 | 0,2161218 |
| ENSG00000279243 | ENSG00000279243 | 11 | 65487241  | 65488136  | lincRNA                          | 4,00 | 0,2161218 |
| ENSG00000226659 | ENSG00000226659 | 10 | 80529597  | 80535942  | antisense                        | 4,00 | 1,40E-02  |
| ENSG00000231748 | ENSG00000231748 | 10 | 69265342  | 69268148  | antisense                        | 4,00 | 7,06E-02  |
| ENSG00000276662 | ENSG00000276662 | 10 | 147820    | 148751    | unprocessed_pseudogene           | 4,00 | 1,40E-02  |
| ENSG00000238245 | MYO5BP2         | 9  | 62857208  | 62858484  | processed_pseudogene             | 4,00 | 1,40E-02  |
| ENSG00000254338 | MAFA-AS1        | 8  | 143417679 | 143419150 | antisense                        | 4,00 | 0,2161218 |
| ENSG00000272172 | ENSG00000272172 | 8  | 143290399 | 143290621 | antisense                        | 4,00 | 7,06E-02  |
| ENSG00000205482 | SPDYE18         | 7  | 77052785  | 77059440  | unprocessed_pseudogene           | 4,00 | 0         |
| ENSG00000232546 | ENSG00000232546 | 7  | 66848496  | 66858136  | unprocessed_pseudogene           | 4,00 | 0         |
| ENSG00000243107 | ENSG00000243107 | 7  | 92200014  | 92206857  | sense_overlapping                | 4,00 | 1,40E-02  |
| ENSG00000224460 | ENSG00000224460 | 6  | 142946047 | 142956698 | lincRNA                          | 4,00 | 0         |
| ENSG00000270604 | HCG17           | 6  | 30234039  | 30326134  | lincRNA                          | 4,00 | 9,18E-02  |
| ENSG00000250222 | ENSG00000250222 | 5  | 181191924 | 181194429 | antisense                        | 4,00 | 2,95E-02  |
| ENSG00000272308 | ENSG00000272308 | 5  | 60866457  | 60866935  | lincRNA                          | 4,00 | 0,2161218 |
| ENSG00000244459 | ENSG00000244459 | 4  | 1574062   | 1580253   | lincRNA                          | 4,00 | 0,2161218 |
| ENSG00000243224 | ENSG00000243224 | 3  | 52239258  | 52241097  | antisense                        | 4,00 | 0         |
| ENSG00000246022 | ALDH1L1-AS2     | 3  | 126180065 | 126210169 | antisense                        | 4,00 | 0         |
| ENSG00000271843 | ENSG00000271843 | 3  | 64008082  | 64008692  | lincRNA                          | 4,00 | 6,27E-03  |
| ENSG00000203327 | ENSG00000203327 | 2  | 55214387  | 55216126  | antisense                        | 4,00 | 0         |
| ENSG00000204588 | LINC01123       | 2  | 109987063 | 109996140 | lincRNA                          | 4,00 | 0,2161218 |
| ENSG00000213453 | FTH1P3          | 2  | 27392784  | 27393367  | processed_pseudogene             | 4,00 | 7,06E-02  |
| ENSG00000272183 | ENSG00000272183 | 2  | 74501717  | 74502365  | antisense                        | 4,00 | 7,06E-02  |
| ENSG00000273113 | ENSG00000273113 | 2  | 241581922 | 241582726 | lincRNA                          | 4,00 | 7,06E-02  |
| ENSG00000215014 | ENSG00000215014 | 1  | 1574975   | 1577075   | lincRNA                          | 4,00 | 0         |
| ENSG00000215840 | ENSG00000215840 | 1  | 161406068 | 161407082 | processed_pseudogene             | 4,00 | 0,2161218 |
| ENSG00000237436 | ENSG00000237436 | 1  | 6783892   | 6784843   | antisense                        | 4,00 | 7,06E-02  |
| ENSG00000240520 | UOX             | 1  | 84365428  | 84397831  | unitary_pseudogene               | 4,00 | 7,06E-02  |
| ENSG00000203588 | IGBP1-AS1       | X  | 70163842  | 70165206  | antisense                        | 4,00 | 1,40E-02  |
| ENSG00000175741 | RWDD4P2         | 7  | 39854494  | 39855056  | processed_pseudogene             | 3,99 | 0         |

|                 |                 |    |           |           |                                  |      |           |
|-----------------|-----------------|----|-----------|-----------|----------------------------------|------|-----------|
| ENSG00000281344 | HELLPAR         | 12 | 102197585 | 102402596 | macro_lncRNA                     | 3,99 | 0         |
| ENSG00000254894 | NAV2-AS1        | 11 | 20119684  | 20120632  | antisense                        | 3,98 | 0         |
| ENSG00000259468 | ENSG00000259468 | 15 | 34255286  | 34257832  | antisense                        | 3,96 | 0         |
| ENSG00000218676 | BRD7P4          | 6  | 111430260 | 111431781 | processed_pseudogene             | 3,96 | 0         |
| ENSG00000218069 | RSL24D1P1       | 6  | 27780619  | 27781111  | processed_pseudogene             | 3,96 | 0         |
| ENSG00000226138 | ENSG00000226138 | 12 | 48085062  | 48085421  | processed_pseudogene             | 3,95 | 0,1836819 |
| ENSG00000258908 | ENSG00000258908 | 14 | 20474789  | 20477089  | lincRNA                          | 3,95 | 2,21E-02  |
| ENSG00000228737 | ENSG00000228737 | 5  | 141618414 | 141626481 | antisense                        | 3,95 | 0         |
| ENSG00000256928 | ENSG00000256928 | 11 | 73395559  | 73396436  | antisense                        | 3,94 | 2,95E-02  |
| ENSG00000218418 | ENSG00000218418 | 6  | 80064286  | 80070199  | processed_pseudogene             | 3,94 | 0         |
| ENSG00000261329 | ENSG00000261329 | 16 | 27678940  | 27718806  | antisense                        | 3,93 | 0         |
| ENSG00000262678 | ENSG00000262678 | 17 | 4986466   | 4987324   | antisense                        | 3,93 | 0         |
| ENSG00000218426 | ENSG00000218426 | 6  | 153282287 | 153282733 | processed_pseudogene             | 3,93 | 0,4332376 |
| ENSG00000269952 | ENSG00000269952 | 10 | 35210416  | 35210750  | sense_intronic                   | 3,93 | 0,2161218 |
| ENSG00000245281 | ENSG00000245281 | 8  | 18084868  | 18096394  | antisense                        | 3,93 | 0         |
| ENSG00000260017 | ENSG00000260017 | 16 | 18803083  | 18812181  | antisense                        | 3,92 | 0         |
| ENSG00000261267 | ENSG00000261267 | 16 | 48559661  | 48587403  | antisense                        | 3,92 | 0         |
| ENSG00000267323 | SLC25A1P5       | 19 | 27805423  | 27806205  | processed_pseudogene             | 3,92 | 6,27E-03  |
| ENSG00000281649 | EBLN3           | 9  | 37079857  | 37090507  | lincRNA                          | 3,91 | 0         |
| ENSG00000269903 | ENSG00000269903 | 12 | 57814494  | 57814926  | lincRNA                          | 3,91 | 0,4332376 |
| ENSG00000233266 | HMGB1P31        | 2  | 54051334  | 54051760  | processed_pseudogene             | 3,91 | 6,27E-03  |
| ENSG00000274828 | ENSG00000274828 | 18 | 79677287  | 79679358  | lincRNA                          | 3,91 | 2,95E-02  |
| ENSG00000273221 | ENSG00000273221 | 1  | 111184415 | 111185061 | antisense                        | 3,90 | 3,30E-03  |
| ENSG00000206028 | ENSG00000206028 | 22 | 26667693  | 26672654  | lincRNA                          | 3,90 | 1,40E-02  |
| ENSG00000230772 | VN1R108P        | 20 | 25734264  | 25735093  | unprocessed_pseudogene           | 3,90 | 0         |
| ENSG00000275401 | ENSG00000275401 | 20 | 38418483  | 38419202  | lincRNA                          | 3,90 | 1,40E-02  |
| ENSG00000277692 | ENSG00000277692 | 20 | 32355053  | 32355734  | lincRNA                          | 3,90 | 0,2161218 |
| ENSG00000267033 | ENSG00000267033 | 19 | 16186276  | 16189458  | antisense                        | 3,90 | 0         |
| ENSG00000267650 | ENSG00000267650 | 19 | 9995997   | 9997163   | antisense                        | 3,90 | 7,06E-02  |
| ENSG00000273189 | ENSG00000273189 | 19 | 49474586  | 49487637  | processed_transcript             | 3,90 | 7,06E-02  |
| ENSG00000267095 | ENSG00000267095 | 17 | 60135762  | 60140081  | lincRNA                          | 3,90 | 0,2161218 |
| ENSG00000275263 | ENSG00000275263 | 16 | 30956872  | 30957199  | lincRNA                          | 3,90 | 1,40E-02  |
| ENSG00000246877 | DNM1P35         | 15 | 75727670  | 75738623  | antisense                        | 3,90 | 7,06E-02  |
| ENSG00000257231 | DYNLL1P4        | 12 | 113789542 | 113789807 | processed_pseudogene             | 3,90 | 7,06E-02  |
| ENSG00000277595 | ENSG00000277595 | 12 | 110032245 | 110032803 | sense_intronic                   | 3,90 | 0,2161218 |
| ENSG00000227972 | PRKRIRP3        | 10 | 52411135  | 52413492  | processed_pseudogene             | 3,90 | 0         |
| ENSG00000236514 | ENSG00000236514 | 10 | 37857740  | 37859110  | antisense                        | 3,90 | 1,40E-02  |
| ENSG00000270874 | ENSG00000270874 | 10 | 86854696  | 86856236  | processed_pseudogene             | 3,90 | 7,06E-02  |
| ENSG00000224083 | ENSG00000224083 | 9  | 5096666   | 5098193   | unprocessed_pseudogene           | 3,90 | 0         |
| ENSG00000226877 | ENSG00000226877 | 9  | 83829656  | 83837861  | antisense                        | 3,90 | 0         |
| ENSG00000234373 | SNX18P7         | 9  | 33576380  | 33577014  | processed_pseudogene             | 3,90 | 7,06E-02  |
| ENSG00000236024 | PRRX2-AS1       | 9  | 129712896 | 129718635 | antisense                        | 3,90 | 0,2161218 |
| ENSG00000253426 | ENSG00000253426 | 8  | 9151742   | 9168136   | lincRNA                          | 3,90 | 7,06E-02  |
| ENSG00000229862 | ENSG00000229862 | 6  | 73523618  | 73570596  | antisense                        | 3,90 | 0         |
| ENSG00000260212 | ENSG00000260212 | 6  | 127659424 | 127660338 | unprocessed_pseudogene           | 3,90 | 1,40E-02  |
| ENSG00000272053 | ENSG00000272053 | 6  | 25014952  | 25042170  | lincRNA                          | 3,90 | 6,27E-03  |
| ENSG00000272980 | ENSG00000272980 | 6  | 166999405 | 167139141 | processed_transcript             | 3,90 | 0         |
| ENSG00000271849 | ENSG00000271849 | 5  | 109687802 | 109688329 | lincRNA                          | 3,90 | 0,2161218 |
| ENSG00000270480 | ENSG00000270480 | 4  | 82691737  | 82692468  | processed_pseudogene             | 3,90 | 1,40E-02  |
| ENSG00000272576 | ENSG00000272576 | 4  | 51918772  | 51919381  | lincRNA                          | 3,90 | 0,2161218 |
| ENSG00000235845 | ENSG00000235845 | 3  | 44899178  | 44900925  | antisense                        | 3,90 | 1,40E-02  |
| ENSG00000260743 | ENSG00000260743 | 3  | 179340322 | 179341887 | lincRNA                          | 3,90 | 7,06E-02  |
| ENSG00000227470 | ENSG00000227470 | 2  | 108878308 | 108878460 | processed_pseudogene             | 3,90 | 1,40E-02  |
| ENSG00000260331 | ENSG00000260331 | 2  | 18547386  | 18548204  | lincRNA                          | 3,90 | 0,2161218 |
| ENSG00000271443 | ENSG00000271443 | 2  | 38535258  | 38536249  | transcribed_processed_pseudogene | 3,90 | 0,2161218 |
| ENSG00000162888 | C1orf147        | 1  | 206491116 | 206497728 | antisense                        | 3,90 | 0         |
| ENSG00000177757 | FAM87B          | 1  | 817371    | 819837    | lincRNA                          | 3,90 | 0         |

|                 |                 |    |           |           |                                    |      |           |
|-----------------|-----------------|----|-----------|-----------|------------------------------------|------|-----------|
| ENSG00000203819 | HIST2H2BC       | 1  | 149850193 | 149850772 | processed_pseudogene               | 3,90 | 0         |
| ENSG00000235790 | ENSG00000235790 | 1  | 31644049  | 31660162  | antisense                          | 3,90 | 7,06E-02  |
| ENSG00000276255 | ENSG00000276255 | 1  | 228073909 | 228076550 | lincRNA                            | 3,90 | 1,40E-02  |
| ENSG00000214653 | HNRNPA3P3       | X  | 140032344 | 140033480 | processed_pseudogene               | 3,90 | 1,40E-02  |
| ENSG00000271918 | ENSG00000271918 | 5  | 116083807 | 116085416 | antisense                          | 3,89 | 0         |
| ENSG00000260942 | CAPN10-AS1      | 2  | 240582700 | 240586699 | antisense                          | 3,89 | 2,95E-02  |
| ENSG00000178660 | ARMC10P1        | 3  | 94506766  | 94507620  | processed_pseudogene               | 3,88 | 0         |
| ENSG00000228172 | ENSG00000228172 | 1  | 25816749  | 25820797  | antisense                          | 3,87 | 0         |
| ENSG00000254198 | ENSG00000254198 | 8  | 43125995  | 43126397  | processed_pseudogene               | 3,86 | 0         |
| ENSG00000260999 | ENSG00000260999 | 16 | 68927547  | 68948261  | lincRNA                            | 3,86 | 0         |
| ENSG00000236383 | LINC00854       | 17 | 43216941  | 43305976  | processed_transcript               | 3,86 | 0         |
| ENSG00000227963 | ENSG00000227963 | 1  | 110286375 | 110339171 | antisense                          | 3,86 | 2,21E-02  |
| ENSG00000260235 | ENSG00000260235 | 15 | 75624793  | 75625690  | antisense                          | 3,85 | 0         |
| ENSG00000236859 | NIFK-AS1        | 2  | 121649650 | 121728481 | antisense                          | 3,84 | 0         |
| ENSG00000236048 | ENSG00000236048 | 7  | 12471352  | 12472545  | processed_pseudogene               | 3,84 | 2,21E-02  |
| ENSG00000165121 | ENSG00000165121 | 9  | 85815966  | 85849511  | unprocessed_pseudogene             | 3,83 | 0         |
| ENSG00000273013 | ENSG00000273013 | 3  | 196474801 | 196475394 | antisense                          | 3,83 | 0         |
| ENSG00000236312 | RPL34P34        | 19 | 22368599  | 22368952  | processed_pseudogene               | 3,82 | 1,40E-02  |
| ENSG00000264304 | ENSG00000264304 | 17 | 28892469  | 28893342  | antisense                          | 3,82 | 3,30E-03  |
| ENSG00000273618 | ENSG00000273618 | 14 | 23530682  | 23532367  | antisense                          | 3,82 | 2,95E-02  |
| ENSG00000230735 | ENSG00000230735 | 1  | 89629725  | 89676386  | sense_intronic                     | 3,82 | 0         |
| ENSG00000157306 | ENSG00000157306 | 14 | 23511760  | 23560778  | processed_transcript               | 3,82 | 3,30E-03  |
| ENSG00000257122 | RRN3P3          | 16 | 22418672  | 22437715  | transcribed_unprocessed_pseudogene | 3,81 | 4,86E-02  |
| ENSG00000174680 | GRIK1-AS1       | 21 | 29748175  | 29764002  | antisense                          | 3,80 | 0         |
| ENSG00000230753 | ZNF341-AS1      | 20 | 33787373  | 33811097  | antisense                          | 3,80 | 7,06E-02  |
| ENSG00000268941 | ENSG00000268941 | 20 | 58634772  | 58635738  | lincRNA                            | 3,80 | 0,2161218 |
| ENSG00000267421 | ENSG00000267421 | 19 | 56536156  | 56538575  | lincRNA                            | 3,80 | 1,40E-02  |
| ENSG00000267651 | ENSG00000267651 | 18 | 37234119  | 37236242  | lincRNA                            | 3,80 | 0         |
| ENSG00000274184 | ENSG00000274184 | 18 | 35268218  | 35270238  | lincRNA                            | 3,80 | 7,06E-02  |
| ENSG00000266947 | ENSG00000266947 | 17 | 35231450  | 35242963  | antisense                          | 3,80 | 7,06E-02  |
| ENSG00000262140 | ENSG00000262140 | 16 | 71833787  | 71835932  | unprocessed_pseudogene             | 3,80 | 1,40E-02  |
| ENSG00000243094 | ENSG00000243094 | 15 | 34085911  | 34086314  | processed_pseudogene               | 3,80 | 0         |
| ENSG00000260469 | C15orf59-AS1    | 15 | 73752317  | 73770613  | lincRNA                            | 3,80 | 0,2161218 |
| ENSG00000258591 | ENSG00000258591 | 14 | 39108342  | 39108707  | processed_pseudogene               | 3,80 | 0,2161218 |
| ENSG00000277128 | ENSG00000277128 | 14 | 19127736  | 19175530  | lincRNA                            | 3,80 | 1,40E-02  |
| ENSG00000176268 | CYCSP34         | 13 | 40863599  | 40863902  | processed_pseudogene               | 3,80 | 0         |
| ENSG00000099869 | IGF2-AS         | 11 | 2140501   | 2148666   | antisense                          | 3,80 | 7,06E-02  |
| ENSG00000228353 | ENSG00000228353 | 10 | 3767915   | 3768751   | antisense                          | 3,80 | 0         |
| ENSG00000226669 | ENSG00000226669 | 9  | 3684076   | 3689626   | lincRNA                            | 3,80 | 7,06E-02  |
| ENSG00000254527 | ENPP7P12        | 8  | 12205759  | 12206389  | processed_pseudogene               | 3,80 | 0         |
| ENSG00000165178 | NCF1C           | 7  | 75156639  | 75172044  | unprocessed_pseudogene             | 3,80 | 0         |
| ENSG00000213394 | RPSAP46         | 7  | 101203614 | 101204495 | processed_pseudogene               | 3,80 | 7,06E-02  |
| ENSG00000204338 | CYP21A1P        | 6  | 32005636  | 32008451  | transcribed_unprocessed_pseudogene | 3,80 | 7,06E-02  |
| ENSG00000231441 | ENSG00000231441 | 6  | 56844002  | 56864078  | antisense                          | 3,80 | 0,2161218 |
| ENSG00000250764 | ENSG00000250764 | 5  | 32103445  | 32121941  | antisense                          | 3,80 | 2,21E-02  |
| ENSG00000251314 | ENSG00000251314 | 5  | 95962001  | 96631085  | antisense                          | 3,80 | 0         |
| ENSG00000269936 | ENSG00000269936 | 5  | 149430286 | 149432834 | lincRNA                            | 3,80 | 1,40E-02  |
| ENSG00000270257 | ENSG00000270257 | 4  | 67638177  | 67638359  | processed_pseudogene               | 3,80 | 1,40E-02  |
| ENSG00000248557 | ENSG00000248557 | 3  | 126624792 | 126626061 | processed_pseudogene               | 3,80 | 7,06E-02  |
| ENSG00000249558 | RCC2P4          | 3  | 126766434 | 126767475 | processed_pseudogene               | 3,80 | 0         |
| ENSG00000268603 | ENSG00000268603 | 2  | 219497611 | 219498246 | antisense                          | 3,80 | 0,2161218 |
| ENSG00000231346 | LINC01160       | 1  | 111599655 | 111608723 | lincRNA                            | 3,80 | 0         |
| ENSG00000260940 | ENSG00000260940 | 1  | 101243158 | 101243749 | sense_overlapping                  | 3,80 | 0,2161218 |
| ENSG00000271576 | ENSG00000271576 | 1  | 84076331  | 84077931  | lincRNA                            | 3,80 | 0,2161218 |
| ENSG00000275557 | ENSG00000275557 | 1  | 149607765 | 149612402 | lincRNA                            | 3,80 | 0         |
| ENSG00000231104 | ENSG00000231104 | 10 | 118017487 | 118045810 | antisense                          | 3,80 | 0         |

|                 |                 |    |           |           |                                        |      |           |
|-----------------|-----------------|----|-----------|-----------|----------------------------------------|------|-----------|
| ENSG00000263327 | TAPT1-AS1       | 4  | 16226685  | 16320140  | antisense                              | 3,79 | 0,4332376 |
| ENSG00000259802 | ENSG00000259802 | 5  | 10352701  | 10353601  | antisense                              | 3,78 | 2,95E-02  |
| ENSG00000232150 | ST13P4          | 13 | 50172089  | 50173181  | processed_pseudogene                   | 3,78 | 4,86E-02  |
| ENSG00000254988 | ENSG00000254988 | 11 | 76955417  | 76978619  | antisense                              | 3,78 | 0         |
| ENSG00000243926 | TIPARP-AS1      | 3  | 156671862 | 156674378 | antisense                              | 3,78 | 0,1836819 |
| ENSG00000273004 | ENSG00000273004 | 1  | 185317779 | 185318530 | lincRNA                                | 3,77 | 1,40E-02  |
| ENSG00000213630 | BOLA3P3         | 5  | 126663337 | 126663568 | processed_pseudogene                   | 3,77 | 0,3318209 |
| ENSG00000254317 | ENSG00000254317 | 8  | 129832301 | 129844504 | antisense                              | 3,76 | 9,18E-02  |
| ENSG00000274104 | ENSG00000274104 | 19 | 34733298  | 34733837  | lincRNA                                | 3,75 | 7,06E-02  |
| ENSG00000224437 | PIGUP1          | 9  | 70916997  | 70917501  | processed_pseudogene                   | 3,75 | 3,30E-03  |
| ENSG00000176812 | ENSG00000176812 | X  | 25194381  | 25195207  | processed_pseudogene                   | 3,75 | 0,1836819 |
| ENSG00000250186 | ENSG00000250186 | 17 | 49404081  | 49405197  | antisense                              | 3,74 | 3,30E-03  |
| ENSG00000272516 | ENSG00000272516 | 10 | 22332404  | 22332987  | lincRNA                                | 3,73 | 4,86E-02  |
| ENSG00000250740 | ENSG00000250740 | 4  | 105927060 | 105932722 | antisense                              | 3,73 | 3,30E-03  |
| ENSG00000260244 | ENSG00000260244 | 4  | 155734448 | 155737062 | sense_overlapping                      | 3,73 | 3,30E-03  |
| ENSG00000203362 | ENSG00000203362 | 6  | 43588230  | 43591362  | antisense                              | 3,72 | 0,0358681 |
| ENSG00000246283 | ENSG00000246283 | 15 | 42739118  | 42743202  | lincRNA                                | 3,72 | 0         |
| ENSG00000249565 | SERBP1P5        | 4  | 78180866  | 78182046  | processed_pseudogene                   | 3,70 | 0         |
| ENSG00000224747 | MTCYBP21        | 21 | 44469929  | 44472516  | processed_pseudogene                   | 3,70 | 0,2161218 |
| ENSG00000271784 | ENSG00000271784 | 20 | 46689659  | 46690289  | lincRNA                                | 3,70 | 7,06E-02  |
| ENSG00000260500 | ENSG00000260500 | 19 | 7918652   | 7919157   | antisense                              | 3,70 | 0,2161218 |
| ENSG00000267474 | ENSG00000267474 | 19 | 14458401  | 14459366  | sense_intronic                         | 3,70 | 0,2161218 |
| ENSG00000274776 | ENSG00000274776 | 18 | 46786699  | 46789297  | lincRNA                                | 3,70 | 0         |
| ENSG00000241157 | ENSG00000241157 | 17 | 60245288  | 60245647  | processed_pseudogene                   | 3,70 | 0,2161218 |
| ENSG00000263786 | ENSG00000263786 | 17 | 75145261  | 75146546  | sense_intronic                         | 3,70 | 0         |
| ENSG00000267221 | ENSG00000267221 | 17 | 42040713  | 42043117  | sense_intronic                         | 3,70 | 0         |
| ENSG00000274758 | ENSG00000274758 | 17 | 2366589   | 2366791   | antisense                              | 3,70 | 7,06E-02  |
| ENSG00000279066 | HEXDC-IT1       | 17 | 82425498  | 82427310  | sense_intronic                         | 3,70 | 1,40E-02  |
| ENSG00000260859 | ENSG00000260859 | 16 | 84828263  | 84829242  | sense_intronic                         | 3,70 | 0         |
| ENSG00000258590 | NBEAP1          | 15 | 20657638  | 20688408  | transcribed_unprocess<br>ed_pseudogene | 3,70 | 0         |
| ENSG00000259738 | ZNF444P1        | 15 | 58865006  | 58865303  | processed_pseudogene                   | 3,70 | 0,2161218 |
| ENSG00000249695 | ENSG00000249695 | 12 | 137411    | 149169    | antisense                              | 3,70 | 1,40E-02  |
| ENSG00000275476 | ENSG00000275476 | 12 | 29277397  | 29277882  | antisense                              | 3,70 | 0,2161218 |
| ENSG00000255026 | ENSG00000255026 | 11 | 287305    | 288987    | antisense                              | 3,70 | 7,06E-02  |
| ENSG00000232075 | MRPL35P2        | 10 | 63634317  | 63634827  | processed_pseudogene                   | 3,70 | 7,06E-02  |
| ENSG00000188801 | ZNF322P1        | 9  | 97198303  | 97199511  | processed_pseudogene                   | 3,70 | 0         |
| ENSG00000213362 | FTH1P12         | 9  | 15527133  | 15527683  | processed_pseudogene                   | 3,70 | 0,2161218 |
| ENSG00000230188 | ENSG00000230188 | 9  | 37490421  | 37490893  | processed_pseudogene                   | 3,70 | 7,06E-02  |
| ENSG00000253161 | LINC01605       | 8  | 37421341  | 37554183  | lincRNA                                | 3,70 | 0,2161218 |
| ENSG00000271781 | ENSG00000271781 | 5  | 675826    | 676616    | antisense                              | 3,70 | 1,40E-02  |
| ENSG00000280026 | ENSG00000280026 | 5  | 141350109 | 141350662 | antisense                              | 3,70 | 0         |
| ENSG00000231574 | ENSG00000231574 | 3  | 177816865 | 177899224 | lincRNA                                | 3,70 | 0         |
| ENSG00000241278 | ENPP7P4         | 3  | 125848223 | 125909372 | unprocessed_pseudoge<br>ne             | 3,70 | 6,27E-03  |
| ENSG00000243415 | ENSG00000243415 | 3  | 146064042 | 146105204 | antisense                              | 3,70 | 7,06E-02  |
| ENSG00000223922 | ASS1P2          | 2  | 38810432  | 38811654  | processed_pseudogene                   | 3,70 | 1,40E-02  |
| ENSG00000215808 | LINC01139       | 1  | 238480384 | 238486023 | lincRNA                                | 3,70 | 0,2161218 |
| ENSG00000235545 | ENSG00000235545 | 1  | 62688482  | 62710694  | antisense                              | 3,70 | 1,40E-02  |
| ENSG00000237200 | ZBTB40-IT1      | 1  | 22517474  | 22519708  | sense_intronic                         | 3,70 | 0         |
| ENSG00000237505 | PKN2-AS1        | 1  | 88537513  | 88685204  | antisense                              | 3,70 | 1,40E-02  |
| ENSG00000278467 | ENSG00000278467 | 1  | 223994262 | 223995196 | lincRNA                                | 3,70 | 0,2161218 |
| ENSG00000233073 | ENSG00000233073 | 7  | 86784226  | 86786670  | antisense                              | 3,70 | 4,86E-02  |
| ENSG00000276805 | ENSG00000276805 | 10 | 38403189  | 38452153  | transcribed_unprocess<br>ed_pseudogene | 3,69 | 0         |
| ENSG00000241671 | ENSG00000241671 | 3  | 153129074 | 153129640 | processed_pseudogene                   | 3,69 | 0         |
| ENSG00000225361 | PPP1R26-AS1     | 9  | 135462727 | 135480777 | antisense                              | 3,69 | 0,0358681 |
| ENSG00000248932 | ENSG00000248932 | 3  | 139389815 | 139583319 | antisense                              | 3,69 | 0         |
| ENSG00000235042 | ENSG00000235042 | 2  | 216385288 | 216412696 | antisense                              | 3,68 | 0         |
| ENSG00000251034 | ENSG00000251034 | 8  | 22540845  | 22545405  | antisense                              | 3,68 | 2,95E-02  |
| ENSG00000219451 | ENSG00000219451 | 7  | 20827326  | 20827753  | processed_pseudogene                   | 3,68 | 7,06E-02  |

|                 |                 |    |           |           |                                    |      |           |
|-----------------|-----------------|----|-----------|-----------|------------------------------------|------|-----------|
| ENSG00000256694 | ENSG00000256694 | 12 | 164664    | 166321    | antisense                          | 3,67 | 0         |
| ENSG00000234664 | HMGN2P5         | 15 | 29730713  | 29730985  | processed_pseudogene               | 3,66 | 4,86E-02  |
| ENSG00000258034 | ENSG00000258034 | 12 | 115961187 | 115962733 | antisense                          | 3,65 | 0         |
| ENSG00000267742 | FAM60CP         | 18 | 60016778  | 60017441  | processed_pseudogene               | 3,64 | 0         |
| ENSG00000281376 | ABALON          | 20 | 31721507  | 31723409  | antisense                          | 3,64 | 0         |
| ENSG00000203414 | BTBD7P1         | 10 | 13156684  | 13158136  | processed_pseudogene               | 3,64 | 0,4332376 |
| ENSG00000260494 | ENSG00000260494 | 16 | 30537202  | 30538231  | unprocessed_pseudogene             | 3,63 | 0         |
| ENSG00000234771 | SLC25A25-AS1    | 9  | 128108581 | 128118693 | antisense                          | 3,63 | 0,1187106 |
| ENSG00000279658 | ENSG00000279658 | 3  | 97836986  | 97874691  | antisense                          | 3,63 | 0         |
| ENSG00000235734 | HMGN1P36        | 2  | 97827248  | 97827545  | processed_pseudogene               | 3,62 | 0,3565078 |
| ENSG00000276535 | ENSG00000276535 | 9  | 88144851  | 88145850  | processed_pseudogene               | 3,62 | 2,21E-02  |
| ENSG00000223653 | ENSG00000223653 | 1  | 85276715  | 85448124  | antisense                          | 3,62 | 6,27E-03  |
| ENSG00000228436 | ENSG00000228436 | 1  | 38860000  | 38919396  | antisense                          | 3,62 | 0,1187106 |
| ENSG00000250138 | ENSG00000250138 | 5  | 69631963  | 69636399  | unprocessed_pseudogene             | 3,62 | 3,30E-03  |
| ENSG00000255629 | ENSG00000255629 | 12 | 64146388  | 64147857  | antisense                          | 3,61 | 3,30E-03  |
| ENSG00000267064 | UXT-AS1         | X  | 47658833  | 47660377  | antisense                          | 3,61 | 4,86E-02  |
| ENSG00000231035 | RPL7L1P9        | 2  | 217760547 | 217761291 | processed_pseudogene               | 3,61 | 3,30E-03  |
| ENSG00000268366 | ENSG00000268366 | 19 | 40443436  | 40444087  | antisense                          | 3,61 | 0         |
| ENSG00000255062 | ENSG00000255062 | 11 | 126294298 | 126304318 | antisense                          | 3,60 | 0         |
| ENSG00000175611 | LINC00476       | 9  | 95759231  | 95875977  | processed_transcript               | 3,60 | 0         |
| ENSG00000211683 | ENSG00000211683 | 22 | 23630618  | 23638941  | processed_transcript               | 3,60 | 1,40E-02  |
| ENSG00000281530 | DGCR12          | 22 | 19061041  | 19061843  | sense_intronic                     | 3,60 | 0         |
| ENSG00000232118 | BACH1-AS1       | 21 | 29370019  | 29376339  | lincRNA                            | 3,60 | 1,40E-02  |
| ENSG00000231742 | LINC01273       | 20 | 50172550  | 50176671  | lincRNA                            | 3,60 | 1,40E-02  |
| ENSG00000268945 | ENSG00000268945 | 19 | 12682693  | 12687279  | lincRNA                            | 3,60 | 1,40E-02  |
| ENSG00000269578 | ENSG00000269578 | 19 | 16586905  | 16587985  | sense_intronic                     | 3,60 | 1,40E-02  |
| ENSG00000265100 | ENSG00000265100 | 17 | 68246629  | 68247938  | antisense                          | 3,60 | 7,06E-02  |
| ENSG00000182376 | ENSG00000182376 | 16 | 88742767  | 88745748  | antisense                          | 3,60 | 0,2161218 |
| ENSG00000274677 | ENSG00000274677 | 16 | 84085979  | 84086590  | sense_intronic                     | 3,60 | 0         |
| ENSG00000276075 | ENSG00000276075 | 16 | 67517862  | 67528675  | antisense                          | 3,60 | 1,40E-02  |
| ENSG00000259744 | ENSG00000259744 | 15 | 70848883  | 70849770  | sense_intronic                     | 3,60 | 0,2161218 |
| ENSG00000247970 | ENSG00000247970 | 14 | 99604556  | 99625740  | lincRNA                            | 3,60 | 1,40E-02  |
| ENSG00000168852 | TPTE2P5         | 13 | 40822296  | 40921749  | transcribed_unprocessed_pseudogene | 3,60 | 0         |
| ENSG00000249790 | ENSG00000249790 | 12 | 8788257   | 8795789   | lincRNA                            | 3,60 | 1,40E-02  |
| ENSG00000258285 | TESC-AS1        | 12 | 117099481 | 117142091 | lincRNA                            | 3,60 | 0,2161218 |
| ENSG00000254639 | ENSG00000254639 | 11 | 46238382  | 46239267  | lincRNA                            | 3,60 | 0,2161218 |
| ENSG00000256006 | ENSG00000256006 | 11 | 18405609  | 18406731  | sense_intronic                     | 3,60 | 0         |
| ENSG00000270030 | ENSG00000270030 | 11 | 325703    | 326294    | lincRNA                            | 3,60 | 7,06E-02  |
| ENSG00000180539 | C9orf139        | 9  | 137027464 | 137037957 | antisense                          | 3,60 | 1,40E-02  |
| ENSG00000232486 | ENSG00000232486 | 9  | 105758164 | 105760755 | processed_pseudogene               | 3,60 | 0         |
| ENSG00000269946 | ENSG00000269946 | 9  | 94166289  | 94200627  | lincRNA                            | 3,60 | 7,06E-02  |
| ENSG00000273381 | ENSG00000273381 | 9  | 91206175  | 91210299  | lincRNA                            | 3,60 | 1,40E-02  |
| ENSG00000250563 | KNOP1P5         | 8  | 126072587 | 126074231 | processed_pseudogene               | 3,60 | 0,2161218 |
| ENSG00000204876 | ENSG00000204876 | 7  | 155962632 | 155966343 | lincRNA                            | 3,60 | 7,06E-02  |
| ENSG00000272556 | GTF2IP13        | 7  | 45769105  | 45815263  | transcribed_unprocessed_pseudogene | 3,60 | 7,06E-02  |
| ENSG00000272950 | ENSG00000272950 | 7  | 98322853  | 98323430  | antisense                          | 3,60 | 1,40E-02  |
| ENSG00000230845 | GSTA10P         | 6  | 52873014  | 52879940  | unprocessed_pseudogene             | 3,60 | 1,40E-02  |
| ENSG00000248469 | ENSG00000248469 | 5  | 176049678 | 176062021 | antisense                          | 3,60 | 0         |
| ENSG00000248925 | ENSG00000248925 | 5  | 269858    | 271516    | antisense                          | 3,60 | 0         |
| ENSG00000250787 | HMGN1P17        | 5  | 56381781  | 56382075  | processed_pseudogene               | 3,60 | 0,2161218 |
| ENSG00000251330 | ENSG00000251330 | 5  | 148430159 | 148430807 | antisense                          | 3,60 | 7,06E-02  |
| ENSG00000249096 | ENSG00000249096 | 4  | 184365183 | 184382306 | lincRNA                            | 3,60 | 1,40E-02  |
| ENSG00000249717 | ENSG00000249717 | 4  | 74955974  | 74970362  | antisense                          | 3,60 | 7,06E-02  |
| ENSG00000226441 | PLCL2-AS1       | 3  | 17042742  | 17044192  | antisense                          | 3,60 | 0         |
| ENSG00000272902 | ENSG00000272902 | 2  | 101151660 | 101155412 | lincRNA                            | 3,60 | 1,40E-02  |
| ENSG00000176320 | ENSG00000176320 | 1  | 158197922 | 158203877 | lincRNA                            | 3,60 | 1,40E-02  |

|                 |                 |    |           |           |                        |      |           |
|-----------------|-----------------|----|-----------|-----------|------------------------|------|-----------|
| ENSG00000198358 | ENSG00000198358 | 1  | 160932465 | 160949922 | antisense              | 3,60 | 7,06E-02  |
| ENSG00000224183 | SDHDP6          | 1  | 25294164  | 25294643  | processed_pseudogene   | 3,60 | 1,40E-02  |
| ENSG00000227141 | ENSG00000227141 | 1  | 179586705 | 179589175 | processed_pseudogene   | 3,60 | 0,2161218 |
| ENSG00000229828 | PDE4DIPP1       | 1  | 148080598 | 148093883 | unprocessed_pseudogene | 3,60 | 1,40E-02  |
| ENSG00000231181 | ENSG00000231181 | 1  | 9576427   | 9576985   | processed_pseudogene   | 3,60 | 7,06E-02  |
| ENSG00000234571 | ENSG00000234571 | 1  | 143877731 | 143885076 | lincRNA                | 3,60 | 0         |
| ENSG00000258082 | ENSG00000258082 | 1  | 234979647 | 234980804 | lincRNA                | 3,60 | 7,06E-02  |
| ENSG00000268288 | ENSG00000268288 | 1  | 151766486 | 151767000 | antisense              | 3,60 | 1,40E-02  |
| ENSG00000268949 | MRPS17P1        | 1  | 44988705  | 44991834  | processed_pseudogene   | 3,60 | 7,06E-02  |
| ENSG00000272691 | ENSG00000272691 | 1  | 85578500  | 85578742  | lincRNA                | 3,60 | 7,06E-02  |
| ENSG00000282057 | ENSG00000282057 | 1  | 85482281  | 85578250  | lincRNA                | 3,60 | 1,40E-02  |
| ENSG00000224401 | RPL7P57         | X  | 47840963  | 47841702  | processed_pseudogene   | 3,60 | 0         |
| ENSG00000258800 | ENSG00000258800 | 14 | 63598874  | 63599248  | lincRNA                | 3,60 | 0         |
| ENSG00000260947 | ENSG00000260947 | 9  | 33697459  | 33700986  | lincRNA                | 3,59 | 0         |
| ENSG00000275437 | ENSG00000275437 | 20 | 62402236  | 62405935  | sense_intronic         | 3,58 | 0         |
| ENSG00000234424 | ENSG00000234424 | 9  | 85753306  | 85786575  | unprocessed_pseudogene | 3,57 | 1,40E-02  |
| ENSG00000248530 | BCL2L12P1       | 3  | 131526447 | 131527179 | processed_pseudogene   | 3,56 | 2,95E-02  |
| ENSG00000214223 | HNRNPA1P10      | 19 | 11666069  | 11667030  | processed_pseudogene   | 3,56 | 0,2746192 |
| ENSG00000237298 | TTN-AS1         | 2  | 178521183 | 178779963 | antisense              | 3,55 | 0         |
| ENSG00000264558 | ENSG00000264558 | 17 | 47682417  | 47682683  | antisense              | 3,54 | 0         |
| ENSG00000227288 | ENSG00000227288 | 1  | 81501794  | 81503468  | processed_pseudogene   | 3,54 | 0         |
| ENSG00000251226 | ENSG00000251226 | 11 | 134735596 | 134763810 | lincRNA                | 3,53 | 0,2161218 |
| ENSG00000242358 | RPS21P4         | 4  | 16256308  | 16256555  | processed_pseudogene   | 3,52 | 2,21E-02  |
| ENSG00000273199 | ENSG00000273199 | 21 | 36319792  | 36320670  | antisense              | 3,52 | 0         |
| ENSG00000233547 | ENSG00000233547 | 10 | 112950646 | 112951875 | antisense              | 3,51 | 0         |
| ENSG00000246477 | ENSG00000246477 | 8  | 11315859  | 11325429  | antisense              | 3,51 | 0         |
| ENSG00000198547 | C2orf203        | 20 | 32631652  | 32673941  | lincRNA                | 3,50 | 7,06E-02  |
| ENSG00000225872 | LINC01529       | 19 | 35788876  | 35797885  | lincRNA                | 3,50 | 0,2161218 |
| ENSG00000269646 | ENSG00000269646 | 19 | 52923382  | 52924075  | lincRNA                | 3,50 | 6,27E-03  |
| ENSG00000277531 | ENSG00000277531 | 19 | 46424697  | 46425237  | lincRNA                | 3,50 | 0,2161218 |
| ENSG00000263862 | LINC01543       | 18 | 26422995  | 26426101  | lincRNA                | 3,50 | 0,2161218 |
| ENSG00000263321 | ENSG00000263321 | 17 | 82729164  | 82734143  | lincRNA                | 3,50 | 0,3318209 |
| ENSG00000264107 | ENSG00000264107 | 17 | 31090787  | 31095450  | antisense              | 3,50 | 0         |
| ENSG00000271749 | ENSG00000271749 | 17 | 63393355  | 63393586  | unprocessed_pseudogene | 3,50 | 0         |
| ENSG00000228201 | ENSG00000228201 | 16 | 648473    | 649200    | antisense              | 3,50 | 1,40E-02  |
| ENSG00000261669 | ENSG00000261669 | 16 | 24803451  | 24819739  | antisense              | 3,50 | 1,40E-02  |
| ENSG00000274099 | ABCB10P1        | 15 | 23179869  | 23182049  | processed_pseudogene   | 3,50 | 0,2161218 |
| ENSG00000258949 | ENSG00000258949 | 14 | 44898908  | 44911863  | antisense              | 3,50 | 0         |
| ENSG00000233672 | RNASEH2B-AS1    | 13 | 50862172  | 50910764  | antisense              | 3,50 | 0         |
| ENSG00000226413 | OR8T1P          | 12 | 48442030  | 48442947  | unprocessed_pseudogene | 3,50 | 0         |
| ENSG00000258099 | ENSG00000258099 | 12 | 111599498 | 111600256 | antisense              | 3,50 | 7,06E-02  |
| ENSG00000224992 | ENSG00000224992 | 9  | 132768965 | 132770212 | sense_intronic         | 3,50 | 7,06E-02  |
| ENSG00000230303 | ENSG00000230303 | 9  | 85785722  | 85793480  | lincRNA                | 3,50 | 0         |
| ENSG00000237711 | MTCO3P11        | 9  | 5100236   | 5101009   | unprocessed_pseudogene | 3,50 | 0         |
| ENSG00000225535 | LINC01393       | 7  | 115078958 | 115126314 | lincRNA                | 3,50 | 0,3318209 |
| ENSG00000240758 | ENSG00000240758 | 7  | 128455937 | 128469197 | processed_transcript   | 3,50 | 1,40E-02  |
| ENSG00000273432 | ENSG00000273432 | 7  | 43951910  | 44019151  | processed_transcript   | 3,50 | 7,06E-02  |
| ENSG00000248126 | ENSG00000248126 | 5  | 1598127   | 1598247   | unprocessed_pseudogene | 3,50 | 0         |
| ENSG00000248677 | ENSG00000248677 | 5  | 6686325   | 6707711   | lincRNA                | 3,50 | 0,2161218 |
| ENSG00000261269 | ENSG00000261269 | 5  | 72439903  | 72442387  | sense_overlapping      | 3,50 | 0,2161218 |
| ENSG00000272389 | ENSG00000272389 | 5  | 112898023 | 112898371 | antisense              | 3,50 | 0,2161218 |
| ENSG00000272717 | ENSG00000272717 | 4  | 139556799 | 139557643 | antisense              | 3,50 | 7,06E-02  |
| ENSG00000224962 | PSAT1P4         | 3  | 166691187 | 166691712 | processed_pseudogene   | 3,50 | 0         |
| ENSG00000273125 | ENSG00000273125 | 3  | 107430930 | 107463912 | lincRNA                | 3,50 | 7,06E-02  |
| ENSG00000227479 | ENSG00000227479 | 2  | 240227560 | 240256035 | lincRNA                | 3,50 | 7,06E-02  |

|                 |                 |    |           |           |                                        |      |           |
|-----------------|-----------------|----|-----------|-----------|----------------------------------------|------|-----------|
| ENSG00000233786 | CDC27P1         | 2  | 132262328 | 132263042 | processed_pseudogene                   | 3,50 | 2,21E-02  |
| ENSG00000237916 | ENSG00000237916 | 2  | 109552536 | 109552846 | processed_pseudogene                   | 3,50 | 0         |
| ENSG00000228084 | ENSG00000228084 | 1  | 99968383  | 99969864  | antisense                              | 3,50 | 0,2161218 |
| ENSG00000232671 | ENSG00000232671 | 1  | 151280024 | 151281929 | antisense                              | 3,50 | 2,95E-02  |
| ENSG00000236936 | ENSG00000236936 | 1  | 21266082  | 21267251  | antisense                              | 3,50 | 0         |
| ENSG00000268869 | ESPNP           | 1  | 16687339  | 16720157  | transcribed_unprocess<br>ed_pseudogene | 3,50 | 7,06E-02  |
| ENSG00000237863 | ENSG00000237863 | X  | 108736011 | 108738903 | antisense                              | 3,50 | 1,40E-02  |
| ENSG00000229111 | MED4-AS1        | 13 | 48077137  | 48079991  | antisense                              | 3,50 | 0         |
| ENSG00000225963 | ENSG00000225963 | 2  | 230121370 | 230174223 | antisense                              | 3,50 | 0         |
| ENSG00000261505 | ENSG00000261505 | 16 | 1317891   | 1322845   | antisense                              | 3,49 | 3,30E-03  |
| ENSG00000226535 | ENSG00000226535 | 9  | 107169569 | 107171148 | processed_pseudogene                   | 3,49 | 0,0358681 |
| ENSG00000237017 | ENSG00000237017 | 19 | 54119511  | 54125343  | antisense                              | 3,49 | 0         |
| ENSG00000273352 | ENSG00000273352 | 18 | 9519449   | 9520199   | sense_intronic                         | 3,47 | 3,30E-03  |
| ENSG00000261118 | ENSG00000261118 | 16 | 89492017  | 89504460  | antisense                              | 3,47 | 0,1392851 |
| ENSG00000257681 | ENSG00000257681 | 12 | 103746315 | 103768858 | antisense                              | 3,47 | 0,4036702 |
| ENSG00000241525 | ENSG00000241525 | 17 | 404468    | 414023    | antisense                              | 3,47 | 1,40E-02  |
| ENSG00000251307 | ENSG00000251307 | 5  | 55233934  | 55295201  | antisense                              | 3,46 | 0         |
| ENSG00000231840 | ENSG00000231840 | 7  | 143255264 | 143287380 | antisense                              | 3,45 | 0,0358681 |
| ENSG00000213115 | ENSG00000213115 | 2  | 188227189 | 188228382 | processed_pseudogene                   | 3,45 | 0,0358681 |
| ENSG00000259977 | ENSG00000259977 | X  | 37906147  | 37949405  | lincRNA                                | 3,45 | 3,30E-03  |
| ENSG00000170846 | ENSG00000170846 | 4  | 6673451   | 6676047   | lincRNA                                | 3,44 | 1,40E-02  |
| ENSG00000273828 | ENSG00000273828 | 20 | 46364551  | 46390885  | antisense                              | 3,43 | 0         |
| ENSG00000271780 | ENSG00000271780 | 14 | 101948347 | 101949425 | lincRNA                                | 3,43 | 0         |
| ENSG00000238103 | RPL9P7          | X  | 23836742  | 23837321  | processed_pseudogene                   | 3,43 | 0,4036702 |
| ENSG00000269177 | ENSG00000269177 | 19 | 43553445  | 43555494  | antisense                              | 3,41 | 0         |
| ENSG00000273492 | ENSG00000273492 | 21 | 26170871  | 26217381  | lincRNA                                | 3,40 | 1,40E-02  |
| ENSG00000236992 | RPL12P12        | 20 | 19823443  | 19823943  | processed_pseudogene                   | 3,40 | 7,06E-02  |
| ENSG00000266983 | ENSG00000266983 | 19 | 5978403   | 6020363   | antisense                              | 3,40 | 0         |
| ENSG00000263916 | ENSG00000263916 | 18 | 49484536  | 49486149  | sense_intronic                         | 3,40 | 0,2161218 |
| ENSG00000274354 | ENSG00000274354 | 18 | 58511598  | 58512310  | sense_intronic                         | 3,40 | 0,2161218 |
| ENSG00000197291 | RAMP2-AS1       | 17 | 42753914  | 42761257  | lincRNA                                | 3,40 | 7,06E-02  |
| ENSG00000262410 | ENSG00000262410 | 17 | 82745068  | 82745709  | sense_intronic                         | 3,40 | 7,06E-02  |
| ENSG00000263531 | ENSG00000263531 | 17 | 30863921  | 30864940  | antisense                              | 3,40 | 0,2161218 |
| ENSG00000264772 | ENSG00000264772 | 17 | 7572826   | 7582024   | processed_transcript                   | 3,40 | 0,2161218 |
| ENSG00000265478 | ENSG00000265478 | 17 | 18809956  | 18810940  | lincRNA                                | 3,40 | 0,2161218 |
| ENSG00000267731 | ENSG00000267731 | 17 | 68189884  | 68192802  | lincRNA                                | 3,40 | 0         |
| ENSG00000267072 | ENSG00000267072 | 16 | 5010909   | 5043999   | lincRNA                                | 3,40 | 1,40E-02  |
| ENSG00000270049 | ENSG00000270049 | 16 | 67481314  | 67505063  | antisense                              | 3,40 | 0         |
| ENSG00000275236 | ENSG00000275236 | 16 | 74289593  | 74291052  | lincRNA                                | 3,40 | 0,2161218 |
| ENSG00000261064 | ENSG00000261064 | 15 | 32536047  | 32587613  | lincRNA                                | 3,40 | 1,40E-02  |
| ENSG00000196668 | LINC00173       | 12 | 116533422 | 116536518 | processed_transcript                   | 3,40 | 0,2161218 |
| ENSG00000258345 | ENSG00000258345 | 12 | 56118968  | 56119939  | antisense                              | 3,40 | 6,27E-03  |
| ENSG00000270048 | ENSG00000270048 | 12 | 123962555 | 123962817 | sense_intronic                         | 3,40 | 7,06E-02  |
| ENSG00000255237 | ENSG00000255237 | 11 | 462930    | 463899    | antisense                              | 3,40 | 0,2161218 |
| ENSG00000256944 | ENSG00000256944 | 11 | 60913166  | 60914052  | antisense                              | 3,40 | 1,40E-02  |
| ENSG00000228352 | ENSG00000228352 | 9  | 34084332  | 34096225  | antisense                              | 3,40 | 1,40E-02  |
| ENSG00000236254 | MTND4P14        | 9  | 5107937   | 5109290   | unprocessed_pseudoge<br>ne             | 3,40 | 0         |
| ENSG00000254388 | DUTP2           | 8  | 123352181 | 123352643 | processed_pseudogene                   | 3,40 | 7,06E-02  |
| ENSG00000226045 | ENSG00000226045 | 7  | 130645225 | 130645594 | processed_pseudogene                   | 3,40 | 0,2161218 |
| ENSG00000226851 | ENSG00000226851 | 7  | 112328189 | 112409623 | antisense                              | 3,40 | 1,40E-02  |
| ENSG00000227113 | ENSG00000227113 | 7  | 65075023  | 65078780  | unprocessed_pseudoge<br>ne             | 3,40 | 1,40E-02  |
| ENSG00000229677 | ENSG00000229677 | 7  | 139049456 | 139050006 | processed_pseudogene                   | 3,40 | 0         |
| ENSG00000272843 | ENSG00000272843 | 7  | 72924418  | 72925125  | antisense                              | 3,40 | 0,2161218 |
| ENSG00000217275 | ENSG00000217275 | 6  | 26202156  | 26202654  | processed_pseudogene                   | 3,40 | 0         |
| ENSG00000220563 | PKMP3           | 6  | 85659892  | 85660606  | processed_pseudogene                   | 3,40 | 7,06E-02  |
| ENSG00000271821 | ENSG00000271821 | 6  | 31200165  | 31201918  | lincRNA                                | 3,40 | 1,40E-02  |
| ENSG00000250347 | ENSG00000250347 | 5  | 142036707 | 142037125 | processed_pseudogene                   | 3,40 | 0,2161218 |



|                 |                 |    |           |           |                                    |      |           |
|-----------------|-----------------|----|-----------|-----------|------------------------------------|------|-----------|
| ENSG00000250892 | ENSG00000250892 | 4  | 201409    | 205009    | unprocessed_pseudogene             | 3,40 | 0         |
| ENSG00000271653 | ENSG00000271653 | 3  | 37216779  | 37217988  | lincRNA                            | 3,40 | 0,2161218 |
| ENSG00000225062 | CATIP-AS1       | 2  | 218366665 | 218367835 | processed_transcript               | 3,40 | 0,2161218 |
| ENSG00000225166 | ENSG00000225166 | 2  | 215453707 | 215463871 | lincRNA                            | 3,40 | 7,06E-02  |
| ENSG00000230638 | ENSG00000230638 | 1  | 41542069  | 41544310  | processed_pseudogene               | 3,40 | 0         |
| ENSG00000232208 | ENSG00000232208 | 1  | 8907393   | 8907744   | processed_pseudogene               | 3,40 | 1,40E-02  |
| ENSG00000232453 | ENSG00000232453 | 1  | 58882868  | 58903747  | lincRNA                            | 3,40 | 0,2161218 |
| ENSG00000237094 | ENSG00000237094 | 1  | 365389    | 501617    | lincRNA                            | 3,40 | 0         |
| ENSG00000240929 | HIST2H2BB       | 1  | 143875171 | 143904650 | transcribed_unprocessed_pseudogene | 3,40 | 0         |
| ENSG00000280195 | ENSG00000280195 | X  | 154396878 | 154398816 | antisense                          | 3,40 | 0         |
| ENSG00000176761 | ZNF285B         | 19 | 44467641  | 44473227  | unprocessed_pseudogene             | 3,38 | 0,0358681 |
| ENSG00000265490 | ENSG00000265490 | 18 | 706523    | 707648    | antisense                          | 3,38 | 0         |
| ENSG00000225302 | ENSG00000225302 | 10 | 116828761 | 116850205 | antisense                          | 3,38 | 0         |
| ENSG00000260616 | ENSG00000260616 | 16 | 50783859  | 50803338  | antisense                          | 3,38 | 6,27E-03  |
| ENSG00000160172 | FAM86C2P        | 11 | 67791648  | 67805336  | transcribed_unprocessed_pseudogene | 3,37 | 0         |
| ENSG00000273027 | ENSG00000273027 | 21 | 44929653  | 44930112  | sense_intronic                     | 3,36 | 0,0358681 |
| ENSG00000267681 | ENSG00000267681 | 17 | 43144956  | 43145255  | transcribed_processed_pseudogene   | 3,36 | 0,1392851 |
| ENSG00000234193 | ENSG00000234193 | 2  | 222917387 | 222919363 | antisense                          | 3,36 | 0,0358681 |
| ENSG00000254604 | ENSG00000254604 | 11 | 70282367  | 70363368  | antisense                          | 3,36 | 0         |
| ENSG00000281912 | LINC01144       | 1  | 45303910  | 45305619  | lincRNA                            | 3,36 | 0,2161218 |
| ENSG00000215179 | MAPK6PS4        | 8  | 46972476  | 46974617  | processed_pseudogene               | 3,35 | 1,40E-02  |
| ENSG00000231721 | LINC-PINT       | 7  | 130941760 | 131110176 | antisense                          | 3,34 | 6,27E-03  |
| ENSG00000184319 | RPL23AP82       | 22 | 50756948  | 50801309  | transcribed_unprocessed_pseudogene | 3,34 | 0         |
| ENSG00000212789 | ST13P5          | 11 | 18261982  | 18263091  | processed_pseudogene               | 3,34 | 0         |
| ENSG00000255100 | ENSG00000255100 | 11 | 76782581  | 76783062  | antisense                          | 3,33 | 0,1836819 |
| ENSG00000273133 | ENSG00000273133 | 4  | 15563698  | 15564253  | antisense                          | 3,33 | 6,27E-03  |
| ENSG00000234390 | USP27X-AS1      | X  | 49876724  | 49879241  | lincRNA                            | 3,33 | 0         |
| ENSG00000223345 | HIST2H2BA       | 1  | 121108210 | 121117257 | transcribed_unprocessed_pseudogene | 3,33 | 0         |
| ENSG00000233527 | ZNF529-AS1      | 19 | 36573070  | 36594708  | antisense                          | 3,31 | 0,1217903 |
| ENSG00000224781 | EIF4A2P4        | X  | 52832704  | 52833899  | processed_pseudogene               | 3,31 | 0,3318209 |
| ENSG00000253948 | ENSG00000253948 | 8  | 98996763  | 99013044  | lincRNA                            | 3,31 | 0,1392851 |
| ENSG00000273090 | ENSG00000273090 | 2  | 36513255  | 36513732  | antisense                          | 3,31 | 0         |
| ENSG00000183535 | COL18A1-AS1     | 21 | 45419716  | 45425070  | antisense                          | 3,30 | 1,40E-02  |
| ENSG00000237338 | FTCD-AS1        | 21 | 46151614  | 46152647  | antisense                          | 3,30 | 1,40E-02  |
| ENSG00000268433 | ENSG00000268433 | 19 | 21677550  | 21678221  | processed_pseudogene               | 3,30 | 0,2161218 |
| ENSG00000267560 | ENSG00000267560 | 18 | 62300036  | 62300998  | antisense                          | 3,30 | 0         |
| ENSG00000260369 | ENSG00000260369 | 17 | 80453735  | 80454729  | lincRNA                            | 3,30 | 0,2161218 |
| ENSG00000262248 | ENSG00000262248 | 17 | 3619256   | 3619913   | processed_pseudogene               | 3,30 | 7,06E-02  |
| ENSG00000265206 | ENSG00000265206 | 17 | 58330884  | 58332508  | antisense                          | 3,30 | 0         |
| ENSG00000267340 | ENSG00000267340 | 17 | 43169880  | 43170077  | processed_pseudogene               | 3,30 | 7,06E-02  |
| ENSG00000260022 | ENSG00000260022 | 16 | 883780    | 885090    | antisense                          | 3,30 | 0         |
| ENSG00000260468 | LINC01290       | 16 | 10514842  | 10528202  | lincRNA                            | 3,30 | 1,40E-02  |
| ENSG00000262703 | ENSG00000262703 | 16 | 11348143  | 11349321  | antisense                          | 3,30 | 0,2161218 |
| ENSG00000260919 | ENSG00000260919 | 15 | 74613194  | 74615596  | antisense                          | 3,30 | 1,40E-02  |
| ENSG00000224743 | TEX26-AS1       | 13 | 30881933  | 30933846  | antisense                          | 3,30 | 7,06E-02  |
| ENSG00000275409 | ENSG00000275409 | 12 | 118430147 | 118430699 | lincRNA                            | 3,30 | 0,2161218 |
| ENSG00000254509 | ENSG00000254509 | 11 | 124791228 | 124791660 | processed_pseudogene               | 3,30 | 0         |
| ENSG00000227374 | ENSG00000227374 | 10 | 129768844 | 129769435 | lincRNA                            | 3,30 | 0         |
| ENSG00000234311 | ENSG00000234311 | 10 | 132433733 | 132441484 | antisense                          | 3,30 | 0,2161218 |
| ENSG00000237840 | FAM21FP         | 10 | 45706431  | 45727231  | transcribed_unprocessed_pseudogene | 3,30 | 0         |
| ENSG00000224809 | BEND3P2         | 9  | 92171241  | 92173494  | processed_pseudogene               | 3,30 | 0,2161218 |
| ENSG00000226237 | ENSG00000226237 | 9  | 86948699  | 87002033  | lincRNA                            | 3,30 | 1,40E-02  |
| ENSG00000229029 | CDCA4P1         | 9  | 14593577  | 14594200  | processed_pseudogene               | 3,30 | 7,06E-02  |

|                 |                 |    |           |           |                                    |      |           |
|-----------------|-----------------|----|-----------|-----------|------------------------------------|------|-----------|
| ENSG00000261215 | ENSG00000261215 | 9  | 34661903  | 34666029  | processed_transcript               | 3,30 | 0,2161218 |
| ENSG00000237586 | ENSG00000237586 | 8  | 124301315 | 124301804 | processed_pseudogene               | 3,30 | 0,2161218 |
| ENSG00000226002 | GTF2IP14        | 7  | 65084103  | 65100232  | unprocessed_pseudogene             | 3,30 | 0,2161218 |
| ENSG00000230825 | ENSG00000230825 | 7  | 7255154   | 7277779   | processed_transcript               | 3,30 | 7,06E-02  |
| ENSG00000239486 | ENSG00000239486 | 7  | 102380465 | 102382737 | unprocessed_pseudogene             | 3,30 | 7,06E-02  |
| ENSG00000254035 | ENSG00000254035 | 5  | 178969390 | 178990116 | antisense                          | 3,30 | 0         |
| ENSG00000271871 | ENSG00000271871 | 5  | 141952419 | 141953375 | antisense                          | 3,30 | 0,2161218 |
| ENSG00000248161 | ENSG00000248161 | 4  | 102418602 | 102450010 | lincRNA                            | 3,30 | 0,2161218 |
| ENSG00000248479 | ENSG00000248479 | 4  | 65702202  | 65705553  | lincRNA                            | 3,30 | 7,06E-02  |
| ENSG00000228446 | ENSG00000228446 | 2  | 224499387 | 224500100 | processed_pseudogene               | 3,30 | 7,06E-02  |
| ENSG00000230646 | KLF2P2          | 2  | 130427731 | 130429225 | processed_pseudogene               | 3,30 | 0         |
| ENSG00000220323 | HIST2H2BD       | 1  | 149843041 | 149843533 | processed_pseudogene               | 3,30 | 1,40E-02  |
| ENSG00000228477 | ENSG00000228477 | 1  | 39962680  | 39963404  | processed_pseudogene               | 3,30 | 1,40E-02  |
| ENSG00000237934 | ENSG00000237934 | 1  | 29223933  | 29224816  | antisense                          | 3,30 | 0         |
| ENSG00000273175 | ENSG00000273175 | 1  | 244864738 | 244865272 | lincRNA                            | 3,30 | 7,06E-02  |
| ENSG00000237341 | SYP-AS1         | X  | 49198966  | 49202454  | antisense                          | 3,30 | 1,40E-02  |
| ENSG00000245311 | ARNTL2-AS1      | 12 | 27389789  | 27446625  | antisense                          | 3,29 | 0         |
| ENSG00000231856 | ENSG00000231856 | 13 | 51803838  | 51813832  | antisense                          | 3,29 | 0         |
| ENSG00000258072 | ENSG00000258072 | 12 | 107903270 | 107903948 | processed_pseudogene               | 3,29 | 4,86E-02  |
| ENSG00000224614 | TNK2-AS1        | 3  | 195908076 | 195911257 | antisense                          | 3,29 | 7,06E-02  |
| ENSG00000154874 | CCDC144B        | 17 | 18537800  | 18625617  | transcribed_unprocessed_pseudogene | 3,28 | 0         |
| ENSG00000271868 | ENSG00000271868 | 2  | 3496956   | 3497428   | lincRNA                            | 3,28 | 0,1217903 |
| ENSG00000183154 | ENSG00000183154 | 8  | 37734761  | 37737426  | antisense                          | 3,28 | 0         |
| ENSG00000231889 | TRAF3IP2-AS1    | 6  | 111483511 | 111598302 | antisense                          | 3,28 | 6,27E-03  |
| ENSG00000224316 | GTF2IP5         | 7  | 65773620  | 65802067  | unprocessed_pseudogene             | 3,27 | 0,1836819 |
| ENSG00000267549 | ENSG00000267549 | 19 | 56314703  | 56341287  | antisense                          | 3,26 | 1,40E-02  |
| ENSG00000260929 | ENSG00000260929 | 16 | 50740910  | 50742815  | antisense                          | 3,26 | 0         |
| ENSG00000259295 | CSPG4P12        | 15 | 85191438  | 85213905  | transcribed_unprocessed_pseudogene | 3,26 | 9,18E-02  |
| ENSG00000270157 | ENSG00000270157 | 7  | 141662922 | 141663846 | sense_intronic                     | 3,26 | 0         |
| ENSG00000213304 | ENSG00000213304 | 19 | 11521968  | 11522498  | processed_pseudogene               | 3,25 | 0,0358681 |
| ENSG00000251015 | SLC25A30-AS1    | 13 | 45418162  | 45420371  | lincRNA                            | 3,25 | 0         |
| ENSG00000260588 | ENSG00000260588 | 8  | 41828165  | 41829934  | lincRNA                            | 3,25 | 0         |
| ENSG00000263766 | ENSG00000263766 | 17 | 47603860  | 47649420  | antisense                          | 3,25 | 0         |
| ENSG00000186594 | MIR22HG         | 17 | 1711493   | 1717174   | lincRNA                            | 3,24 | 4,86E-02  |
| ENSG00000228113 | ENSG00000228113 | 7  | 88219359  | 88304367  | antisense                          | 3,23 | 9,18E-02  |
| ENSG00000267871 | ENSG00000267871 | 19 | 57267220  | 57280334  | antisense                          | 3,23 | 0,2161218 |
| ENSG00000260339 | HEXA-AS1        | 15 | 72376113  | 72378788  | antisense                          | 3,23 | 0         |
| ENSG00000234076 | TPRG1-AS1       | 3  | 188941715 | 188947639 | lincRNA                            | 3,23 | 6,27E-03  |
| ENSG00000238287 | ENSG00000238287 | 1  | 40493157  | 40508661  | antisense                          | 3,23 | 0,1392851 |
| ENSG00000257225 | ENSG00000257225 | 12 | 42459366  | 42466128  | antisense                          | 3,23 | 0         |
| ENSG00000264575 | LINC00526       | 18 | 5236724   | 5238598   | lincRNA                            | 3,23 | 1,40E-02  |
| ENSG00000227581 | ENSG00000227581 | X  | 90039213  | 90039834  | processed_pseudogene               | 3,23 | 3,30E-03  |
| ENSG00000214992 | AKAP17BP        | X  | 119249346 | 119257667 | unprocessed_pseudogene             | 3,23 | 0         |
| ENSG00000166770 | ZNF667-AS1      | 19 | 56477250  | 56500666  | lincRNA                            | 3,22 | 3,30E-03  |
| ENSG00000248785 | HIGD1AP14       | 4  | 109673843 | 109674124 | processed_pseudogene               | 3,22 | 0         |
| ENSG00000261183 | ENSG00000261183 | 15 | 40835808  | 40844387  | antisense                          | 3,21 | 0,2161218 |
| ENSG00000250990 | ENSG00000250990 | 7  | 77246340  | 77258123  | antisense                          | 3,21 | 0,4332376 |
| ENSG00000234608 | MAPKAPK5-AS1    | 12 | 111839764 | 111842902 | lincRNA                            | 3,20 | 2,21E-02  |
| ENSG00000241954 | ENSG00000241954 | 22 | 32383786  | 32385631  | lincRNA                            | 3,20 | 1,40E-02  |
| ENSG00000277232 | GTSE1-AS1       | 22 | 46295143  | 46296660  | lincRNA                            | 3,20 | 7,06E-02  |
| ENSG00000233056 | ERVH48-1        | 21 | 42916803  | 42925646  | lincRNA                            | 3,20 | 0         |
| ENSG00000228663 | PSMD10P1        | 20 | 50913731  | 50914411  | processed_pseudogene               | 3,20 | 0,2161218 |
| ENSG00000265933 | LINC00668       | 18 | 6919496   | 6929966   | lincRNA                            | 3,20 | 0         |
| ENSG00000237911 | SRP68P3         | 17 | 20415792  | 20416697  | unprocessed_pseudogene             | 3,20 | 1,40E-02  |

|                 |                 |    |           |           |                      |      |           |
|-----------------|-----------------|----|-----------|-----------|----------------------|------|-----------|
| ENSG00000259349 | ENSG00000259349 | 17 | 60526293  | 60550798  | antisense            | 3,20 | 1,40E-02  |
| ENSG00000274341 | ENSG00000274341 | 17 | 32408013  | 32408309  | lincRNA              | 3,20 | 7,06E-02  |
| ENSG00000278668 | ENSG00000278668 | 17 | 32410159  | 32410746  | lincRNA              | 3,20 | 0,2161218 |
| ENSG00000259209 | ENSG00000259209 | 16 | 72805998  | 72809872  | antisense            | 3,20 | 0         |
| ENSG00000260932 | ENSG00000260932 | 16 | 83929796  | 83931223  | antisense            | 3,20 | 0         |
| ENSG00000261386 | ENSG00000261386 | 16 | 67549214  | 67563958  | lincRNA              | 3,20 | 0,2161218 |
| ENSG00000261513 | ENSG00000261513 | 16 | 71723180  | 71724230  | antisense            | 3,20 | 0         |
| ENSG00000273551 | ENSG00000273551 | 16 | 1148224   | 1148754   | lincRNA              | 3,20 | 7,06E-02  |
| ENSG00000277639 | ENSG00000277639 | 16 | 53043066  | 53044216  | lincRNA              | 3,20 | 0,2161218 |
| ENSG00000244952 | ENSG00000244952 | 15 | 32613733  | 32615111  | lincRNA              | 3,20 | 0         |
| ENSG00000273771 | ENSG00000273771 | 15 | 96080713  | 96084584  | lincRNA              | 3,20 | 7,06E-02  |
| ENSG00000259502 | ENSG00000259502 | 14 | 67610986  | 67613864  | processed_pseudogene | 3,20 | 1,40E-02  |
| ENSG00000262119 | ENSG00000262119 | 14 | 26592747  | 26594517  | sense_intronic       | 3,20 | 1,40E-02  |
| ENSG00000275481 | ENSG00000275481 | 12 | 46388856  | 46392126  | lincRNA              | 3,20 | 7,06E-02  |
| ENSG00000255328 | ENSG00000255328 | 11 | 327171    | 330122    | lincRNA              | 3,20 | 0,2161218 |
| ENSG00000261340 | LINC01616       | 11 | 29980113  | 29982392  | lincRNA              | 3,20 | 0,2161218 |
| ENSG00000226318 | ENSG00000226318 | 10 | 67960702  | 67961464  | processed_pseudogene | 3,20 | 1,40E-02  |
| ENSG00000228651 | ENSG00000228651 | 10 | 52556702  | 52755409  | antisense            | 3,20 | 7,06E-02  |
| ENSG00000272791 | ENSG00000272791 | 10 | 73630556  | 73631490  | lincRNA              | 3,20 | 7,06E-02  |
| ENSG00000273012 | ENSG00000273012 | 10 | 33341655  | 33341905  | lincRNA              | 3,20 | 0,2161218 |
| ENSG00000223621 | AK4P4           | 9  | 5855781   | 5856426   | processed_pseudogene | 3,20 | 7,06E-02  |
| ENSG00000227666 | CYCSP24         | 9  | 94038030  | 94038345  | processed_pseudogene | 3,20 | 0         |
| ENSG00000237212 | ENSG00000237212 | 9  | 96095211  | 96101912  | lincRNA              | 3,20 | 7,06E-02  |
| ENSG00000237357 | ENSG00000237357 | 9  | 42566679  | 42569353  | lincRNA              | 3,20 | 0         |
| ENSG00000273186 | ENSG00000273186 | 9  | 128431598 | 128432006 | sense_intronic       | 3,20 | 0,2161218 |
| ENSG00000231881 | ENSG00000231881 | 6  | 44073913  | 44077952  | lincRNA              | 3,20 | 0,2161218 |
| ENSG00000244349 | HCG16           | 6  | 28986800  | 28988536  | antisense            | 3,20 | 1,40E-02  |
| ENSG00000261003 | ENSG00000261003 | 6  | 170414139 | 170419325 | sense_overlapping    | 3,20 | 7,06E-02  |
| ENSG00000248511 | ENSG00000248511 | 4  | 92297251  | 92304178  | lincRNA              | 3,20 | 0,2161218 |
| ENSG00000236409 | NRADDP          | 3  | 47011542  | 47013146  | unitary_pseudogene   | 3,20 | 1,40E-02  |
| ENSG00000272263 | ENSG00000272263 | 3  | 12832219  | 12832728  | antisense            | 3,20 | 7,06E-02  |
| ENSG00000223884 | ENSG00000223884 | 2  | 7062727   | 7077880   | antisense            | 3,20 | 0,2161218 |
| ENSG00000226791 | ENSG00000226791 | 2  | 98761938  | 98772920  | lincRNA              | 3,20 | 7,06E-02  |
| ENSG00000233155 | HMGA1P8         | 2  | 74418122  | 74418442  | processed_pseudogene | 3,20 | 0         |
| ENSG00000271228 | ENSG00000271228 | 2  | 32013061  | 32013368  | antisense            | 3,20 | 7,06E-02  |
| ENSG00000221953 | C1orf229        | 1  | 247110160 | 247112417 | lincRNA              | 3,20 | 1,40E-02  |
| ENSG00000224014 | ENSG00000224014 | 1  | 247175256 | 247175525 | processed_pseudogene | 3,20 | 0         |
| ENSG00000224751 | SHMT1P1         | 1  | 43850300  | 43851611  | processed_pseudogene | 3,20 | 0,2161218 |
| ENSG00000227811 | FAM212B-AS1     | 1  | 111739841 | 111747798 | antisense            | 3,20 | 1,40E-02  |
| ENSG00000260464 | ENSG00000260464 | 1  | 93847174  | 93848939  | lincRNA              | 3,20 | 7,06E-02  |
| ENSG00000270110 | ENSG00000270110 | 1  | 228295911 | 228302998 | antisense            | 3,20 | 7,06E-02  |
| ENSG00000272482 | ENSG00000272482 | 1  | 12618900  | 12619244  | lincRNA              | 3,20 | 0,2161218 |
| ENSG00000272982 | ENSG00000272982 | 1  | 111181374 | 111181491 | antisense            | 3,20 | 0         |
| ENSG00000234230 | ZFX-AS1         | X  | 24146225  | 24149654  | antisense            | 3,20 | 7,06E-02  |
| ENSG00000242562 | DCAF13P1        | 7  | 106125371 | 106126700 | processed_pseudogene | 3,20 | 0,0358681 |
| ENSG00000205959 | ENSG00000205959 | 4  | 8482270   | 8512610   | lincRNA              | 3,20 | 7,06E-02  |
| ENSG00000258057 | BCDIN3D-AS1     | 12 | 49828542  | 49841143  | antisense            | 3,20 | 0         |
| ENSG00000215349 | MRPL3P1         | 13 | 19304593  | 19305625  | processed_pseudogene | 3,20 | 6,27E-03  |
| ENSG00000250903 | GMDS-AS1        | 6  | 2245748   | 2482022   | lincRNA              | 3,19 | 0         |
| ENSG00000269293 | ZSCAN16-AS1     | 6  | 28121795  | 28137293  | antisense            | 3,19 | 2,21E-02  |
| ENSG00000236411 | NDUFAF4P3       | 3  | 37789921  | 37790445  | processed_pseudogene | 3,19 | 3,30E-03  |
| ENSG00000278719 | MCM8-AS1        | 20 | 5990943   | 6005821   | antisense            | 3,18 | 0,0358681 |
| ENSG00000271662 | ENSG00000271662 | 3  | 195650146 | 195651472 | processed_pseudogene | 3,18 | 0,0358681 |
| ENSG00000241494 | ENSG00000241494 | 14 | 101677943 | 101678380 | processed_pseudogene | 3,18 | 0,1836819 |
| ENSG00000232586 | KIAA1614-AS1    | 1  | 180949699 | 180954887 | antisense            | 3,16 | 1,95E-02  |
| ENSG00000260405 | ENSG00000260405 | 16 | 17096202  | 17096421  | processed_pseudogene | 3,15 | 7,06E-02  |
| ENSG00000197670 | ENSG00000197670 | 20 | 53552770  | 53575863  | antisense            | 3,15 | 0         |
| ENSG00000231095 | GYG1P3          | 1  | 55222379  | 55223372  | processed_pseudogene | 3,14 | 7,06E-02  |
| ENSG00000250896 | RNPS1P1         | 4  | 11371975  | 11372892  | processed_pseudogene | 3,14 | 0         |
| ENSG00000187988 | KCTD9P3         | 9  | 37477149  | 37478317  | processed_pseudogene | 3,13 | 0         |
| ENSG00000225261 | ENSG00000225261 | X  | 149548210 | 149549835 | antisense            | 3,13 | 1,95E-02  |

|                 |                 |    |           |           |                                    |      |           |
|-----------------|-----------------|----|-----------|-----------|------------------------------------|------|-----------|
| ENSG00000277978 | ENSG00000277978 | 16 | 66565620  | 66566001  | antisense                          | 3,11 | 0,1836819 |
| ENSG00000271870 | ENSG00000271870 | 3  | 3152942   | 3153435   | antisense                          | 3,10 | 6,27E-03  |
| ENSG00000232186 | ENSG00000232186 | X  | 75326772  | 75327999  | processed_pseudogene               | 3,10 | 0         |
| ENSG00000229999 | ENSG00000229999 | 22 | 40372664  | 40388290  | antisense                          | 3,10 | 0,2161218 |
| ENSG00000231933 | ENSG00000231933 | 22 | 25876854  | 25903247  | antisense                          | 3,10 | 7,06E-02  |
| ENSG00000231302 | RPL36P2         | 20 | 50620763  | 50621077  | processed_pseudogene               | 3,10 | 0,2161218 |
| ENSG00000276603 | ENSG00000276603 | 20 | 37526642  | 37527060  | sense_intronic                     | 3,10 | 1,40E-02  |
| ENSG00000231561 | CEACAMP5        | 19 | 42654200  | 42669076  | unprocessed_pseudogene             | 3,10 | 0         |
| ENSG00000267056 | ENSG00000267056 | 19 | 15910582  | 15911824  | processed_pseudogene               | 3,10 | 0         |
| ENSG00000267274 | ENSG00000267274 | 19 | 11939959  | 11953381  | sense_overlapping                  | 3,10 | 1,40E-02  |
| ENSG00000267498 | ENSG00000267498 | 19 | 29213235  | 29215815  | lincRNA                            | 3,10 | 0         |
| ENSG00000269053 | ENSG00000269053 | 19 | 17419305  | 17419774  | antisense                          | 3,10 | 1,40E-02  |
| ENSG00000264269 | ENSG00000264269 | 18 | 49023703  | 49048474  | antisense                          | 3,10 | 1,40E-02  |
| ENSG00000259212 | ENSG00000259212 | 15 | 90595840  | 90596447  | antisense                          | 3,10 | 0         |
| ENSG00000259358 | ENSG00000259358 | 15 | 31765743  | 31768201  | processed_pseudogene               | 3,10 | 7,06E-02  |
| ENSG00000260211 | ENSG00000260211 | 15 | 32313126  | 32315654  | processed_pseudogene               | 3,10 | 1,40E-02  |
| ENSG00000259138 | ENSG00000259138 | 14 | 75127153  | 75136930  | antisense                          | 3,10 | 0         |
| ENSG00000255566 | ENSG00000255566 | 12 | 64442510  | 64443330  | processed_pseudogene               | 3,10 | 1,40E-02  |
| ENSG00000257752 | ENSG00000257752 | 12 | 88057876  | 88058578  | processed_pseudogene               | 3,10 | 7,06E-02  |
| ENSG00000251323 | ENSG00000251323 | 11 | 78423982  | 78429836  | lincRNA                            | 3,10 | 1,40E-02  |
| ENSG00000224745 | ENSG00000224745 | 10 | 87878692  | 87880427  | sense_intronic                     | 3,10 | 7,06E-02  |
| ENSG00000227730 | MTND6P5         | 9  | 5091093   | 5091604   | unprocessed_pseudogene             | 3,10 | 7,06E-02  |
| ENSG00000236717 | ENSG00000236717 | 9  | 92150382  | 92157445  | lincRNA                            | 3,10 | 7,06E-02  |
| ENSG00000246792 | ENSG00000246792 | 8  | 90646441  | 90656598  | antisense                          | 3,10 | 0         |
| ENSG00000189316 | ENSG00000189316 | 7  | 64888527  | 64890100  | antisense                          | 3,10 | 1,40E-02  |
| ENSG00000227014 | ENSG00000227014 | 7  | 29988600  | 30025660  | antisense                          | 3,10 | 7,06E-02  |
| ENSG00000232716 | ENSG00000232716 | 7  | 130840204 | 130843725 | processed_pseudogene               | 3,10 | 7,06E-02  |
| ENSG00000235253 | ENSG00000235253 | 5  | 132942932 | 132945050 | processed_pseudogene               | 3,10 | 0,2161218 |
| ENSG00000241112 | RPL29P14        | 5  | 149545383 | 149545810 | processed_pseudogene               | 3,10 | 1,40E-02  |
| ENSG00000262096 | PCDHB19P        | 5  | 141239923 | 141243034 | transcribed_unprocessed_pseudogene | 3,10 | 0,2161218 |
| ENSG00000272144 | ENSG00000272144 | 5  | 43061395  | 43062441  | lincRNA                            | 3,10 | 0,2161218 |
| ENSG00000248174 | ENSG00000248174 | 4  | 174094660 | 174220398 | lincRNA                            | 3,10 | 7,06E-02  |
| ENSG00000248196 | ENSG00000248196 | 4  | 87166844  | 87167734  | processed_pseudogene               | 3,10 | 0,2161218 |
| ENSG00000231464 | ENSG00000231464 | 3  | 195996738 | 195998233 | processed_pseudogene               | 3,10 | 1,40E-02  |
| ENSG00000239482 | ENSG00000239482 | 3  | 112302478 | 112332791 | lincRNA                            | 3,10 | 1,40E-02  |
| ENSG00000271973 | ENSG00000271973 | 3  | 48672455  | 48672733  | lincRNA                            | 3,10 | 7,06E-02  |
| ENSG00000225991 | RPL23AP34       | 2  | 28308161  | 28308570  | processed_pseudogene               | 3,10 | 0,2161218 |
| ENSG00000272716 | ENSG00000272716 | 2  | 32165046  | 32165757  | lincRNA                            | 3,10 | 7,06E-02  |
| ENSG00000225704 | ENSG00000225704 | 1  | 171345089 | 171345320 | processed_pseudogene               | 3,10 | 7,06E-02  |
| ENSG00000229914 | ENSG00000229914 | 1  | 158195633 | 158196131 | processed_pseudogene               | 3,10 | 7,06E-02  |
| ENSG00000233421 | ENSG00000233421 | 1  | 16533886  | 16536172  | lincRNA                            | 3,10 | 7,06E-02  |
| ENSG00000236546 | ENSG00000236546 | 1  | 39897745  | 39899098  | antisense                          | 3,10 | 1,40E-02  |
| ENSG00000213997 | PGAM1P7         | X  | 46646594  | 46647330  | processed_pseudogene               | 3,10 | 1,40E-02  |
| ENSG00000237351 | ENSG00000237351 | X  | 47156638  | 47158199  | processed_pseudogene               | 3,10 | 7,06E-02  |
| ENSG00000279392 | ENSG00000279392 | 14 | 55229217  | 55229681  | processed_pseudogene               | 3,10 | 3,30E-03  |
| ENSG00000267567 | ENSG00000267567 | 19 | 32718298  | 32719595  | lincRNA                            | 3,09 | 0,4332376 |
| ENSG00000277977 | ENSG00000277977 | 19 | 52392659  | 52392755  | unprocessed_pseudogene             | 3,09 | 0,4332376 |
| ENSG00000260213 | ENSG00000260213 | 16 | 81016792  | 81035759  | antisense                          | 3,08 | 0,1836819 |
| ENSG00000255571 | MIR9-3HG        | 15 | 89361579  | 89398487  | lincRNA                            | 3,08 | 0,2161218 |
| ENSG00000254934 | LINC00678       | 11 | 27617626  | 27634627  | lincRNA                            | 3,08 | 0,1836819 |
| ENSG00000214559 | ENSG00000214559 | 4  | 98251688  | 98261630  | antisense                          | 3,08 | 0         |
| ENSG00000242899 | RPL7P16         | 3  | 132243528 | 132244265 | processed_pseudogene               | 3,08 | 0,0358681 |
| ENSG00000273486 | ENSG00000273486 | 3  | 136837338 | 136839021 | antisense                          | 3,08 | 0         |
| ENSG00000226086 | EIF3LP3         | 10 | 38080056  | 38080877  | processed_pseudogene               | 3,08 | 0         |
| ENSG00000236299 | ENSG00000236299 | 7  | 63888200  | 63900794  | lincRNA                            | 3,08 | 0         |
| ENSG00000225489 | ENSG00000225489 | 9  | 6716495   | 6727438   | lincRNA                            | 3,07 | 4,86E-02  |
| ENSG00000266601 | ENSG00000266601 | 17 | 47929682  | 47933106  | antisense                          | 3,06 | 1,40E-02  |

|                 |                 |    |           |           |                                    |      |           |
|-----------------|-----------------|----|-----------|-----------|------------------------------------|------|-----------|
| ENSG00000149531 | FRG1BP          | 20 | 30377372  | 30399257  | unprocessed_pseudogene             | 3,05 | 0         |
| ENSG00000279006 | ENSG00000279006 | 22 | 25048967  | 25051966  | antisense                          | 3,05 | 0         |
| ENSG00000272146 | ARF4-AS1        | 3  | 57597715  | 57600927  | antisense                          | 3,05 | 0,1836819 |
| ENSG00000267724 | ENSG00000267724 | 18 | 47105946  | 47108062  | antisense                          | 3,04 | 2,21E-02  |
| ENSG00000234618 | RPSAP9          | 9  | 76398699  | 76399586  | processed_pseudogene               | 3,04 | 0         |
| ENSG00000263846 | CIAPIN1P        | 18 | 26599408  | 26600338  | processed_pseudogene               | 3,04 | 3,30E-03  |
| ENSG00000263826 | ENSG00000263826 | 3  | 186781780 | 186784179 | antisense                          | 3,02 | 0         |
| ENSG00000225137 | DYNC112P1       | 10 | 50264978  | 50266815  | processed_pseudogene               | 3,02 | 0         |
| ENSG00000228348 | EFCAB14P1       | 1  | 35122022  | 35122484  | processed_pseudogene               | 3,02 | 0         |
| ENSG00000235513 | ENSG00000235513 | 22 | 41209122  | 41217627  | antisense                          | 3,01 | 0         |
| ENSG00000111788 | ENSG00000111788 | 12 | 9277235   | 9313241   | unprocessed_pseudogene             | 3,01 | 3,30E-03  |
| ENSG00000204934 | ATP6VOE2-AS1    | 7  | 149867697 | 149880610 | antisense                          | 3,01 | 0,2161218 |
| ENSG00000270294 | ENSG00000270294 | 10 | 109680442 | 109681041 | processed_pseudogene               | 3,01 | 0         |
| ENSG00000245910 | SNHG6           | 8  | 66921684  | 66926398  | processed_transcript               | 3,00 | 0,1392851 |
| ENSG00000249310 | APOBEC3B-AS1    | 22 | 38991559  | 38998209  | antisense                          | 3,00 | 2,21E-02  |
| ENSG00000273464 | ENSG00000273464 | 21 | 29657406  | 29657831  | antisense                          | 3,00 | 0,2161218 |
| ENSG00000278041 | ENSG00000278041 | 20 | 21499261  | 21502934  | lincRNA                            | 3,00 | 0,2161218 |
| ENSG00000261754 | ENSG00000261754 | 19 | 34811589  | 34814345  | lincRNA                            | 3,00 | 7,06E-02  |
| ENSG00000266941 | ENSG00000266941 | 19 | 5899895   | 5901511   | antisense                          | 3,00 | 2,95E-02  |
| ENSG00000266963 | ENSG00000266963 | 19 | 38361795  | 38362484  | antisense                          | 3,00 | 7,06E-02  |
| ENSG00000268496 | ENSG00000268496 | 19 | 54434183  | 54434665  | sense_intronic                     | 3,00 | 0,2161218 |
| ENSG00000269091 | ENSG00000269091 | 19 | 50043196  | 50051062  | antisense                          | 3,00 | 0         |
| ENSG00000271499 | ENSG00000271499 | 19 | 19750618  | 19752544  | processed_pseudogene               | 3,00 | 0         |
| ENSG00000264339 | ENSG00000264339 | 18 | 738058    | 739444    | antisense                          | 3,00 | 1,40E-02  |
| ENSG00000260034 | LCMT1-AS2       | 16 | 25140577  | 25149032  | antisense                          | 3,00 | 6,27E-03  |
| ENSG00000261172 | ENSG00000261172 | 16 | 90110574  | 90168225  | lincRNA                            | 3,00 | 0         |
| ENSG00000276571 | ENSG00000276571 | 16 | 19694035  | 19694428  | antisense                          | 3,00 | 1,40E-02  |
| ENSG00000260814 | ENSG00000260814 | 15 | 41770756  | 41772732  | lincRNA                            | 3,00 | 0,0358681 |
| ENSG00000237356 | ENSG00000237356 | 14 | 53169054  | 53687258  | processed_transcript               | 3,00 | 0         |
| ENSG00000258569 | ENSG00000258569 | 14 | 76710658  | 76761388  | lincRNA                            | 3,00 | 7,06E-02  |
| ENSG00000258689 | LINC01269       | 14 | 70698698  | 70712153  | lincRNA                            | 3,00 | 0,2161218 |
| ENSG00000231530 | ENSG00000231530 | 13 | 42043727  | 42044247  | antisense                          | 3,00 | 7,06E-02  |
| ENSG00000277831 | ENSG00000277831 | 13 | 44369365  | 44369877  | lincRNA                            | 3,00 | 0,2161218 |
| ENSG00000242661 | RPS3AP43        | 12 | 8359054   | 8359834   | processed_pseudogene               | 3,00 | 0,2161218 |
| ENSG00000248265 | ENSG00000248265 | 12 | 54058254  | 54122234  | lincRNA                            | 3,00 | 7,06E-02  |
| ENSG00000257097 | CLIP1-AS1       | 12 | 122395542 | 122400857 | lincRNA                            | 3,00 | 6,27E-03  |
| ENSG00000271963 | ENSG00000271963 | 12 | 133115692 | 133122340 | antisense                          | 3,00 | 0         |
| ENSG00000229512 | ENSG00000229512 | 11 | 1763009   | 1763749   | sense_intronic                     | 3,00 | 0         |
| ENSG00000241782 | ENSG00000241782 | 11 | 77868722  | 77869195  | processed_pseudogene               | 3,00 | 0,2161218 |
| ENSG00000254739 | ENSG00000254739 | 11 | 528907    | 529659    | antisense                          | 3,00 | 0,2161218 |
| ENSG00000233435 | AGGF1P2         | 10 | 133640789 | 133642894 | processed_pseudogene               | 3,00 | 7,06E-02  |
| ENSG00000251079 | BMS1P2          | 10 | 47538377  | 47551954  | transcribed_unprocessed_pseudogene | 3,00 | 7,06E-02  |
| ENSG00000271981 | ENSG00000271981 | 10 | 22332587  | 22332981  | lincRNA                            | 3,00 | 0,2161218 |
| ENSG00000230537 | ENSG00000230537 | 9  | 91104957  | 91107304  | lincRNA                            | 3,00 | 7,06E-02  |
| ENSG00000236083 | OR13E1P         | 9  | 35859062  | 35859983  | unitary_pseudogene                 | 3,00 | 0         |
| ENSG00000275549 | C9orf173-AS1    | 9  | 137250219 | 137253497 | antisense                          | 3,00 | 0,2161218 |
| ENSG00000253549 | CA3-AS1         | 8  | 85441851  | 85464915  | antisense                          | 3,00 | 0,2161218 |
| ENSG00000253931 | ENSG00000253931 | 8  | 143412749 | 143417054 | antisense                          | 3,00 | 0,2161218 |
| ENSG00000231892 | ENSG00000231892 | 7  | 3196626   | 3198256   | lincRNA                            | 3,00 | 7,06E-02  |
| ENSG00000219470 | ENSG00000219470 | 6  | 43538822  | 43539703  | processed_pseudogene               | 3,00 | 2,21E-02  |
| ENSG00000233902 | ENSG00000233902 | 6  | 31462728  | 31463336  | unprocessed_pseudogene             | 3,00 | 0         |
| ENSG00000230612 | ENSG00000230612 | 5  | 132688681 | 132723725 | antisense                          | 3,00 | 7,06E-02  |
| ENSG00000277192 | ENSG00000277192 | 5  | 132488382 | 132488702 | antisense                          | 3,00 | 0         |
| ENSG00000226155 | ENSG00000226155 | 3  | 195912049 | 195913986 | antisense                          | 3,00 | 0,2161218 |
| ENSG00000240032 | ENSG00000240032 | 3  | 146066344 | 146069185 | antisense                          | 3,00 | 7,06E-02  |
| ENSG00000244515 | KRT18P34        | 3  | 157162663 | 157163932 | processed_pseudogene               | 3,00 | 7,06E-02  |
| ENSG00000272483 | ENSG00000272483 | 3  | 11611602  | 11612197  | antisense                          | 3,00 | 0,2161218 |

|                 |                 |    |           |           |                                    |      |           |
|-----------------|-----------------|----|-----------|-----------|------------------------------------|------|-----------|
| ENSG00000223935 | ENSG00000223935 | 2  | 64395220  | 64453798  | antisense                          | 3,00 | 1,40E-02  |
| ENSG00000224337 | FAM8A3P         | 2  | 149320593 | 149321436 | processed_pseudogene               | 3,00 | 0         |
| ENSG00000266931 | ENSG00000266931 | 2  | 87055658  | 87055800  | unprocessed_pseudogene             | 3,00 | 0         |
| ENSG00000225315 | ENSG00000225315 | 1  | 24040835  | 24086799  | antisense                          | 3,00 | 0,2161218 |
| ENSG00000225920 | RIMKLP2         | 1  | 219199914 | 219200567 | processed_pseudogene               | 3,00 | 0         |
| ENSG00000229739 | ENSG00000229739 | 1  | 186435161 | 186470291 | antisense                          | 3,00 | 0,2161218 |
| ENSG00000230092 | ENSG00000230092 | 1  | 800879    | 817712    | transcribed_unprocessed_pseudogene | 3,00 | 3,30E-03  |
| ENSG00000231979 | ENSG00000231979 | 1  | 239915439 | 239916955 | lincRNA                            | 3,00 | 0,2161218 |
| ENSG00000232879 | ENSG00000232879 | 1  | 161034834 | 161035006 | processed_pseudogene               | 3,00 | 7,06E-02  |
| ENSG00000270585 | ENSG00000270585 | 1  | 220207618 | 220208282 | processed_pseudogene               | 3,00 | 7,06E-02  |
| ENSG00000227329 | ENSG00000227329 | X  | 53164391  | 53164557  | processed_pseudogene               | 3,00 | 0         |
| ENSG00000233984 | RPSAP14         | X  | 74031462  | 74031820  | processed_pseudogene               | 3,00 | 0         |
| ENSG00000224660 | SH3BP5-AS1      | 3  | 15254184  | 15264493  | antisense                          | 3,00 | 0,3318209 |
| ENSG00000267776 | ENSG00000267776 | 19 | 56376704  | 56377284  | sense_intronic                     | 2,99 | 0         |
| ENSG00000236869 | ENSG00000236869 | 3  | 44557357  | 44685653  | antisense                          | 2,98 | 0         |
| ENSG00000253334 | ENSG00000253334 | 8  | 81791823  | 81815714  | antisense                          | 2,97 | 6,27E-03  |
| ENSG00000266002 | ENSG00000266002 | 17 | 59400488  | 59403303  | antisense                          | 2,97 | 6,27E-03  |
| ENSG00000259322 | ENSG00000259322 | 15 | 78293286  | 78296049  | antisense                          | 2,97 | 0         |
| ENSG00000231799 | ENSG00000231799 | 9  | 89449558  | 89450754  | processed_pseudogene               | 2,97 | 2,21E-02  |
| ENSG00000228451 | SDAD1P1         | 8  | 26379259  | 26382953  | transcribed_processed_pseudogene   | 2,96 | 1,40E-02  |
| ENSG00000258568 | RHOQP1          | 14 | 49599994  | 49600572  | processed_pseudogene               | 2,96 | 3,30E-03  |
| ENSG00000233382 | NKAPP1          | X  | 120120953 | 120245267 | transcribed_processed_pseudogene   | 2,96 | 0         |
| ENSG00000258090 | ENSG00000258090 | 12 | 76757191  | 76757914  | processed_pseudogene               | 2,96 | 7,06E-02  |
| ENSG00000225975 | LINC01534       | 19 | 36685440  | 36687449  | lincRNA                            | 2,96 | 6,27E-03  |
| ENSG00000259093 | ENSG00000259093 | 14 | 63123033  | 63128214  | lincRNA                            | 2,95 | 6,27E-03  |
| ENSG00000255992 | ENSG00000255992 | 12 | 131924736 | 131929351 | lincRNA                            | 2,95 | 0         |
| ENSG00000227040 | ENSG00000227040 | 4  | 56760919  | 56761485  | processed_pseudogene               | 2,94 | 9,18E-02  |
| ENSG00000214280 | ENSG00000214280 | 3  | 139582928 | 139583593 | processed_pseudogene               | 2,94 | 3,30E-03  |
| ENSG00000225670 | CADM3-AS1       | 1  | 159194325 | 159207973 | antisense                          | 2,93 | 0,4036702 |
| ENSG00000223396 | ENSG00000223396 | 1  | 201518703 | 201530474 | lincRNA                            | 2,93 | 6,27E-03  |
| ENSG00000220804 | ENSG00000220804 | 2  | 242088633 | 242160153 | transcribed_unprocessed_pseudogene | 2,92 | 0         |
| ENSG00000261143 | ADAMTS7P3       | 15 | 77976042  | 77993057  | transcribed_unprocessed_pseudogene | 2,92 | 0,4332376 |
| ENSG00000243024 | RPS11P6         | 12 | 64222337  | 64397065  | transcribed_processed_pseudogene   | 2,92 | 2,21E-02  |
| ENSG00000246308 | ENSG00000246308 | 11 | 10809297  | 10822931  | antisense                          | 2,92 | 0,3318209 |
| ENSG00000250412 | KLHL2P1         | 4  | 119334329 | 119378233 | unprocessed_pseudogene             | 2,92 | 0         |
| ENSG00000235358 | ENSG00000235358 | 1  | 41242373  | 41284861  | lincRNA                            | 2,92 | 0         |
| ENSG00000230071 | RPL4P6          | 22 | 40586700  | 40588003  | processed_pseudogene               | 2,92 | 3,30E-03  |
| ENSG00000231749 | ABCA9-AS1       | 17 | 68944531  | 69042784  | antisense                          | 2,91 | 3,30E-03  |
| ENSG00000228839 | PIK3IP1-AS1     | 22 | 31292499  | 31338021  | antisense                          | 2,91 | 0         |
| ENSG00000263335 | ENSG00000263335 | 16 | 15726674  | 15732993  | antisense                          | 2,91 | 6,27E-03  |
| ENSG00000205662 | ENSG00000205662 | X  | 3929869   | 3937855   | lincRNA                            | 2,91 | 0,4332376 |
| ENSG00000231458 | RNASEH1P2       | 17 | 16683438  | 16684227  | processed_pseudogene               | 2,91 | 0         |
| ENSG00000224490 | TTC21B-AS1      | 2  | 165933857 | 165949891 | processed_transcript               | 2,90 | 0         |
| ENSG00000232581 | ENSG00000232581 | 7  | 6578565   | 6588974   | antisense                          | 2,90 | 0,3318209 |
| ENSG00000236213 | ENSG00000236213 | 2  | 37600136  | 37646698  | antisense                          | 2,90 | 4,86E-02  |
| ENSG00000234380 | LINC01426       | 21 | 34745757  | 34784886  | antisense                          | 2,90 | 0,2161218 |
| ENSG00000267197 | ENSG00000267197 | 19 | 10490339  | 10491000  | sense_intronic                     | 2,90 | 0,2161218 |
| ENSG00000270679 | ENSG00000270679 | 19 | 44290081  | 44290911  | processed_pseudogene               | 2,90 | 0,2161218 |
| ENSG00000264745 | TTC39C-AS1      | 18 | 23994213  | 24015339  | antisense                          | 2,90 | 7,06E-02  |
| ENSG00000267543 | ENSG00000267543 | 17 | 76549951  | 76550826  | sense_intronic                     | 2,90 | 1,40E-02  |
| ENSG00000259711 | ENSG00000259711 | 16 | 54934913  | 54954665  | lincRNA                            | 2,90 | 7,06E-02  |
| ENSG00000260495 | ENSG00000260495 | 16 | 81310731  | 81313423  | antisense                          | 2,90 | 0,2161218 |
| ENSG00000261390 | MAFTRR          | 16 | 79715232  | 79770563  | lincRNA                            | 2,90 | 0,2161218 |

|                 |                 |    |           |           |                                    |      |           |
|-----------------|-----------------|----|-----------|-----------|------------------------------------|------|-----------|
| ENSG00000259656 | ENSG00000259656 | 15 | 49101791  | 49103264  | lincRNA                            | 2,90 | 1,40E-02  |
| ENSG00000258283 | ENSG00000258283 | 12 | 48995150  | 48996334  | antisense                          | 2,90 | 7,06E-02  |
| ENSG00000189014 | FAM35DP         | 10 | 47689707  | 47730436  | unprocessed_pseudogene             | 2,90 | 1,40E-02  |
| ENSG00000226578 | ENSG00000226578 | 10 | 37775371  | 37784131  | lincRNA                            | 2,90 | 1,40E-02  |
| ENSG00000228882 | CICP9           | 10 | 38452987  | 38455365  | processed_pseudogene               | 2,90 | 0,2161218 |
| ENSG00000229081 | LINC01165       | 10 | 132520827 | 132522449 | antisense                          | 2,90 | 1,40E-02  |
| ENSG00000273980 | ENSG00000273980 | 10 | 133257144 | 133257551 | lincRNA                            | 2,90 | 7,06E-02  |
| ENSG00000204778 | ENSG00000204778 | 9  | 65287914  | 65323015  | unprocessed_pseudogene             | 2,90 | 0         |
| ENSG00000227638 | HNRNPA1P14      | 9  | 88410529  | 88411463  | processed_pseudogene               | 2,90 | 0         |
| ENSG00000229065 | ENSG00000229065 | 9  | 95113708  | 95114461  | antisense                          | 2,90 | 1,40E-02  |
| ENSG00000261451 | ENSG00000261451 | 8  | 10433672  | 10438312  | sense_overlapping                  | 2,90 | 7,06E-02  |
| ENSG00000270131 | ENSG00000270131 | 8  | 96140572  | 96140944  | lincRNA                            | 2,90 | 0,2161218 |
| ENSG00000219074 | SOD1P1          | 6  | 53196720  | 53197159  | processed_pseudogene               | 2,90 | 0,2161218 |
| ENSG00000237927 | ENSG00000237927 | 6  | 159586955 | 159589169 | lincRNA                            | 2,90 | 7,06E-02  |
| ENSG00000271734 | ENSG00000271734 | 6  | 108030249 | 108030718 | lincRNA                            | 2,90 | 7,06E-02  |
| ENSG00000271755 | ENSG00000271755 | 6  | 27404010  | 27406964  | lincRNA                            | 2,90 | 7,06E-02  |
| ENSG00000240729 | ENSG00000240729 | 5  | 177264766 | 177265241 | processed_pseudogene               | 2,90 | 0,2161218 |
| ENSG00000249947 | XBP1P1          | 5  | 112885094 | 112885745 | processed_pseudogene               | 2,90 | 7,06E-02  |
| ENSG00000228413 | ENSG00000228413 | 3  | 196044695 | 196045254 | processed_pseudogene               | 2,90 | 0,2161218 |
| ENSG00000229048 | DUTP1           | 3  | 125310881 | 125311350 | processed_pseudogene               | 2,90 | 7,06E-02  |
| ENSG00000242578 | ENSG00000242578 | 3  | 170410512 | 170418615 | lincRNA                            | 2,90 | 0,2161218 |
| ENSG00000249540 | ENSG00000249540 | 3  | 141307612 | 141307933 | processed_pseudogene               | 2,90 | 1,40E-02  |
| ENSG00000273308 | ENSG00000273308 | 3  | 197645669 | 197646017 | lincRNA                            | 2,90 | 0,2161218 |
| ENSG00000229754 | CXCR2P1         | 2  | 218059155 | 218065729 | transcribed_unprocessed_pseudogene | 2,90 | 0,2161218 |
| ENSG00000230044 | ENSG00000230044 | 2  | 11665369  | 11665969  | processed_pseudogene               | 2,90 | 0,2161218 |
| ENSG00000230799 | ENSG00000230799 | 2  | 201762737 | 201763573 | processed_pseudogene               | 2,90 | 1,40E-02  |
| ENSG00000231610 | ENSG00000231610 | 2  | 6495877   | 6496798   | processed_pseudogene               | 2,90 | 0,2161218 |
| ENSG00000233718 | MYCNOS          | 2  | 15921037  | 15942249  | antisense                          | 2,90 | 1,40E-02  |
| ENSG00000237979 | ENSG00000237979 | 2  | 65500993  | 65502138  | processed_pseudogene               | 2,90 | 0,2161218 |
| ENSG00000224616 | RTCA-AS1        | 1  | 100264009 | 100266120 | antisense                          | 2,90 | 0,2161218 |
| ENSG00000281091 | ENSG00000281091 | X  | 103404777 | 103408299 | lincRNA                            | 2,90 | 1,40E-02  |
| ENSG00000225284 | ENSG00000225284 | 2  | 38861720  | 38863133  | antisense                          | 2,89 | 0         |
| ENSG00000230337 | ENSG00000230337 | 1  | 11099675  | 11102100  | antisense                          | 2,89 | 0         |
| ENSG00000228283 | KATNBL1P6       | 6  | 146802359 | 146803824 | transcribed_processed_pseudogene   | 2,89 | 0         |
| ENSG00000225014 | KCTD9P1         | 17 | 20111824  | 20112990  | transcribed_processed_pseudogene   | 2,89 | 0         |
| ENSG00000213492 | NT5C3AP1        | 4  | 117574512 | 117576174 | transcribed_processed_pseudogene   | 2,88 | 3,30E-03  |
| ENSG00000242208 | RPL5P29         | 11 | 56357328  | 56358221  | processed_pseudogene               | 2,88 | 6,27E-03  |
| ENSG00000257773 | ST13P3          | 12 | 106015897 | 106017006 | processed_pseudogene               | 2,87 | 0,2161218 |
| ENSG00000229785 | SLC25A38P1      | 1  | 172748560 | 172749502 | processed_pseudogene               | 2,87 | 4,86E-02  |
| ENSG00000226971 | ENSG00000226971 | X  | 48446893  | 48448879  | processed_pseudogene               | 2,87 | 0         |
| ENSG00000236577 | SNRPGP14        | 13 | 49488970  | 49489364  | processed_pseudogene               | 2,87 | 6,27E-03  |
| ENSG00000253431 | SRPK2P          | 8  | 62863082  | 62864181  | processed_pseudogene               | 2,87 | 2,21E-02  |
| ENSG00000270587 | ENSG00000270587 | 17 | 63610772  | 63611184  | processed_pseudogene               | 2,86 | 1,40E-02  |
| ENSG00000242477 | ENSG00000242477 | 5  | 86884231  | 86884881  | processed_pseudogene               | 2,86 | 0,3318209 |
| ENSG00000228818 | ENSG00000228818 | 1  | 240142670 | 240145389 | processed_pseudogene               | 2,85 | 0,4036702 |
| ENSG00000244716 | ENSG00000244716 | 1  | 108992282 | 108992836 | processed_pseudogene               | 2,85 | 0,2161218 |
| ENSG00000231884 | NDUFB1P1        | 3  | 48181547  | 48181726  | processed_pseudogene               | 2,84 | 0,4850164 |
| ENSG00000228439 | TSTD3           | 6  | 99520693  | 99531918  | antisense                          | 2,84 | 0         |
| ENSG00000237476 | ENSG00000237476 | 22 | 20957092  | 20964679  | lincRNA                            | 2,83 | 4,86E-02  |
| ENSG00000260796 | ENSG00000260796 | 16 | 28820570  | 28822033  | antisense                          | 2,83 | 0,1836819 |
| ENSG00000237004 | ZNRF2P1         | 7  | 32728569  | 32729011  | processed_pseudogene               | 2,83 | 1,40E-02  |
| ENSG00000271580 | ENSG00000271580 | 1  | 205091163 | 205091946 | processed_pseudogene               | 2,83 | 0,1836819 |
| ENSG00000233476 | EEF1A1P6        | 7  | 22510616  | 22511999  | processed_pseudogene               | 2,83 | 9,18E-02  |
| ENSG00000263707 | ENSG00000263707 | 17 | 12990149  | 12990610  | antisense                          | 2,83 | 6,27E-03  |
| ENSG00000261071 | ENSG00000261071 | 6  | 13614111  | 13615155  | antisense                          | 2,83 | 0,3318209 |

|                 |                 |    |           |           |                                    |      |           |
|-----------------|-----------------|----|-----------|-----------|------------------------------------|------|-----------|
| ENSG00000204650 | CRHR1-IT1       | 17 | 45620328  | 45655156  | processed_transcript               | 2,83 | 4,86E-02  |
| ENSG00000205930 | C21orf62-AS1    | 21 | 32772100  | 32893735  | lincRNA                            | 2,82 | 6,27E-03  |
| ENSG00000268201 | ENSG00000268201 | 19 | 58266635  | 58267685  | sense_intronic                     | 2,82 | 0,1392851 |
| ENSG00000234149 | ENSG00000234149 | 10 | 75003055  | 75025174  | antisense                          | 2,82 | 0         |
| ENSG00000226754 | ENSG00000226754 | 1  | 53238610  | 53242783  | antisense                          | 2,81 | 0,1217903 |
| ENSG00000231646 | FSIP2-AS1       | 2  | 185783691 | 185800151 | antisense                          | 2,81 | 1,95E-02  |
| ENSG00000276564 | ENSG00000276564 | 16 | 14150833  | 14153235  | lincRNA                            | 2,81 | 6,27E-03  |
| ENSG00000259790 | ANP32BP1        | 15 | 75321397  | 75322693  | transcribed_processed_pseudogene   | 2,80 | 2,21E-02  |
| ENSG00000258995 | ENSG00000258995 | 14 | 63123007  | 63123201  | processed_pseudogene               | 2,80 | 3,30E-03  |
| ENSG00000180279 | ENSG00000180279 | 19 | 50808874  | 50818880  | lincRNA                            | 2,80 | 0,2161218 |
| ENSG00000235681 | ENSG00000235681 | 19 | 54446830  | 54447047  | processed_pseudogene               | 2,80 | 0,2161218 |
| ENSG00000268297 | CLEC4GP1        | 19 | 7787549   | 7790621   | unprocessed_pseudogene             | 2,80 | 1,40E-02  |
| ENSG00000270802 | ENSG00000270802 | 19 | 15338948  | 15339237  | processed_pseudogene               | 2,80 | 7,06E-02  |
| ENSG00000235028 | HMGN1P30        | 18 | 58018794  | 58019061  | processed_pseudogene               | 2,80 | 1,40E-02  |
| ENSG00000187013 | C17orf82        | 17 | 61411751  | 61413280  | lincRNA                            | 2,80 | 0,2161218 |
| ENSG00000224254 | MTCO1P39        | 17 | 19605454  | 19605933  | unprocessed_pseudogene             | 2,80 | 0,2161218 |
| ENSG00000262652 | ENSG00000262652 | 17 | 82578023  | 82578616  | sense_intronic                     | 2,80 | 1,40E-02  |
| ENSG00000264057 | ENSG00000264057 | 17 | 64927634  | 64934203  | transcribed_unprocessed_pseudogene | 2,80 | 0         |
| ENSG00000265460 | ENSG00000265460 | 17 | 39238466  | 39250818  | transcribed_processed_pseudogene   | 2,80 | 0,2161218 |
| ENSG00000267048 | ENSG00000267048 | 16 | 89906157  | 89918233  | processed_transcript               | 2,80 | 1,40E-02  |
| ENSG00000275445 | ENSG00000275445 | 16 | 22007480  | 22008062  | antisense                          | 2,80 | 7,06E-02  |
| ENSG00000259767 | ENSG00000259767 | 15 | 83022236  | 83024336  | sense_intronic                     | 2,80 | 0,2161218 |
| ENSG00000260361 | ENSG00000260361 | 15 | 92779757  | 92781492  | sense_intronic                     | 2,80 | 7,06E-02  |
| ENSG00000276702 | ENSG00000276702 | 15 | 33850538  | 33851178  | antisense                          | 2,80 | 7,06E-02  |
| ENSG00000228444 | ENSG00000228444 | 13 | 75631271  | 75632135  | sense_intronic                     | 2,80 | 7,06E-02  |
| ENSG00000236520 | GPC6-AS1        | 13 | 94154193  | 94187991  | antisense                          | 2,80 | 0,2161218 |
| ENSG00000238025 | ZDHHC4P1        | 13 | 42933858  | 42934892  | processed_pseudogene               | 2,80 | 7,06E-02  |
| ENSG00000275294 | ENSG00000275294 | 13 | 27178263  | 27251288  | lincRNA                            | 2,80 | 7,06E-02  |
| ENSG00000255933 | ENSG00000255933 | 12 | 131756966 | 131758047 | lincRNA                            | 2,80 | 1,40E-02  |
| ENSG00000257467 | ENSG00000257467 | 12 | 81270675  | 81312422  | lincRNA                            | 2,80 | 7,06E-02  |
| ENSG00000258172 | ENSG00000258172 | 12 | 94272150  | 94277195  | antisense                          | 2,80 | 7,06E-02  |
| ENSG00000228915 | OR7E128P        | 11 | 71893410  | 71894433  | unprocessed_pseudogene             | 2,80 | 1,40E-02  |
| ENSG00000231233 | CFAP58-AS1      | 10 | 104351591 | 104353575 | antisense                          | 2,80 | 7,06E-02  |
| ENSG00000205879 | FAM90A2P        | 8  | 12172202  | 12178575  | unprocessed_pseudogene             | 2,80 | 0         |
| ENSG00000254936 | ENSG00000254936 | 8  | 11123381  | 11126064  | sense_intronic                     | 2,80 | 7,06E-02  |
| ENSG00000229660 | ENSG00000229660 | 7  | 157281536 | 157282686 | lincRNA                            | 2,80 | 7,06E-02  |
| ENSG00000231255 | ENSG00000231255 | 7  | 86775081  | 86776022  | antisense                          | 2,80 | 0,2161218 |
| ENSG00000236510 | ENSG00000236510 | 7  | 3642815   | 3643784   | antisense                          | 2,80 | 0,2161218 |
| ENSG00000271064 | ENSG00000271064 | 7  | 66748838  | 66749077  | processed_pseudogene               | 2,80 | 7,06E-02  |
| ENSG00000282572 | ENSG00000282572 | 7  | 19018     | 35489     | processed_transcript               | 2,80 | 7,06E-02  |
| ENSG00000181126 | HLA-V           | 6  | 29790954  | 29797811  | transcribed_unprocessed_pseudogene | 2,80 | 0,2161218 |
| ENSG00000230910 | ENSG00000230910 | 6  | 68629962  | 68635027  | antisense                          | 2,80 | 0,2161218 |
| ENSG00000251682 | ENSG00000251682 | 5  | 61347126  | 61347716  | processed_pseudogene               | 2,80 | 1,40E-02  |
| ENSG00000272070 | ENSG00000272070 | 5  | 141326210 | 141329357 | lincRNA                            | 2,80 | 0,2161218 |
| ENSG00000276945 | ENSG00000276945 | 5  | 61145846  | 61146376  | unprocessed_pseudogene             | 2,80 | 1,40E-02  |
| ENSG00000248416 | ENSG00000248416 | 4  | 722275    | 724034    | antisense                          | 2,80 | 1,40E-02  |
| ENSG00000236833 | ENSG00000236833 | 3  | 197660565 | 197665757 | lincRNA                            | 2,80 | 7,06E-02  |
| ENSG00000244383 | FAM3D-AS1       | 3  | 58607080  | 58634440  | antisense                          | 2,80 | 0,2161218 |
| ENSG00000224346 | BICD1P1         | 2  | 200844240 | 200845461 | processed_pseudogene               | 2,80 | 0         |
| ENSG00000227938 | ENSG00000227938 | 2  | 28448167  | 28450184  | lincRNA                            | 2,80 | 0,2161218 |
| ENSG00000237380 | HOXD-AS2        | 2  | 176121611 | 176137098 | antisense                          | 2,80 | 7,06E-02  |
| ENSG00000271889 | ENSG00000271889 | 2  | 61151433  | 61162105  | lincRNA                            | 2,80 | 0,2161218 |



|                 |                 |    |           |           |                                    |      |           |
|-----------------|-----------------|----|-----------|-----------|------------------------------------|------|-----------|
| ENSG00000272180 | ENSG00000272180 | 2  | 55952158  | 56181652  | lincRNA                            | 2,80 | 7,06E-02  |
| ENSG00000272979 | ENSG00000272979 | 2  | 190454092 | 190454521 | antisense                          | 2,80 | 0,2161218 |
| ENSG00000224259 | LINC01133       | 1  | 159961218 | 159984750 | lincRNA                            | 2,80 | 1,40E-02  |
| ENSG00000226499 | ENSG00000226499 | 1  | 44843921  | 44844082  | processed_pseudogene               | 2,80 | 0,2161218 |
| ENSG00000259678 | ENSG00000259678 | 15 | 51414097  | 51498833  | antisense                          | 2,80 | 0         |
| ENSG00000277998 | ENSG00000277998 | 2  | 164573741 | 164574054 | unprocessed_pseudogene             | 2,79 | 0,0358681 |
| ENSG00000239959 | ENPP7P2         | 3  | 75446769  | 75491202  | unprocessed_pseudogene             | 2,79 | 0         |
| ENSG00000260708 | ENSG00000260708 | 22 | 46761894  | 46762563  | antisense                          | 2,79 | 0,2161218 |
| ENSG00000223508 | RPL23AP53       | 8  | 213186    | 232231    | transcribed_processed_pseudogene   | 2,79 | 0         |
| ENSG00000271268 | ENSG00000271268 | 17 | 35861093  | 35861566  | processed_pseudogene               | 2,78 | 0         |
| ENSG00000271266 | LAPTM4BP2       | 3  | 72884234  | 72884679  | processed_pseudogene               | 2,78 | 0         |
| ENSG00000267207 | ENSG00000267207 | 17 | 61034636  | 61070122  | antisense                          | 2,78 | 0         |
| ENSG00000226266 | ENSG00000226266 | 2  | 159670708 | 159712435 | lincRNA                            | 2,78 | 3,30E-03  |
| ENSG00000247934 | ENSG00000247934 | 12 | 28163298  | 28190738  | antisense                          | 2,77 | 1,95E-02  |
| ENSG00000226816 | ENSG00000226816 | 7  | 23206013  | 23208045  | lincRNA                            | 2,77 | 9,18E-02  |
| ENSG00000235237 | ENSG00000235237 | 22 | 37166757  | 37182850  | antisense                          | 2,76 | 0         |
| ENSG00000236792 | ENSG00000236792 | 1  | 192247505 | 192247947 | processed_pseudogene               | 2,76 | 0         |
| ENSG00000226167 | AP4B1-AS1       | 1  | 113856635 | 113901237 | antisense                          | 2,75 | 6,27E-03  |
| ENSG00000235453 | TOPORS-AS1      | 9  | 32551144  | 32567005  | antisense                          | 2,75 | 6,27E-03  |
| ENSG00000226332 | ENSG00000226332 | 20 | 62305432  | 62306325  | antisense                          | 2,75 | 0         |
| ENSG00000244513 | ENSG00000244513 | 3  | 69013941  | 69056622  | antisense                          | 2,74 | 0         |
| ENSG00000255650 | FAM222A-AS1     | 12 | 109734166 | 109773508 | antisense                          | 2,73 | 4,86E-02  |
| ENSG00000244265 | SIAH2-AS1       | 3  | 150761937 | 150762538 | antisense                          | 2,73 | 0         |
| ENSG00000277954 | ENSG00000277954 | 16 | 79202624  | 79206739  | antisense                          | 2,73 | 0,1187106 |
| ENSG00000265282 | ENSG00000265282 | 17 | 63430468  | 63432211  | lincRNA                            | 2,73 | 0,1836819 |
| ENSG00000260269 | ENSG00000260269 | 15 | 75527150  | 75601205  | processed_transcript               | 2,73 | 6,27E-03  |
| ENSG00000275611 | ENSG00000275611 | 13 | 110429026 | 110429342 | sense_intronic                     | 2,73 | 0,1836819 |
| ENSG00000256947 | ENSG00000256947 | 11 | 114210616 | 114356571 | antisense                          | 2,73 | 6,27E-03  |
| ENSG00000253704 | ENSG00000253704 | 8  | 94553722  | 94569745  | lincRNA                            | 2,73 | 0,1836819 |
| ENSG00000226599 | ENSG00000226599 | 6  | 150650772 | 150652025 | lincRNA                            | 2,73 | 0,0358681 |
| ENSG00000163915 | IGF2BP2-AS1     | 3  | 185712528 | 185729787 | antisense                          | 2,73 | 0,1392851 |
| ENSG00000260025 | ENSG00000260025 | 2  | 36354749  | 36355114  | lincRNA                            | 2,73 | 0,1836819 |
| ENSG00000255495 | ENSG00000255495 | 8  | 12194467  | 12196280  | antisense                          | 2,72 | 3,30E-03  |
| ENSG00000250218 | ALDH1L1-AS1     | 3  | 126103640 | 126108069 | antisense                          | 2,71 | 0,1836819 |
| ENSG00000247556 | OIP5-AS1        | 15 | 41283990  | 41309737  | processed_transcript               | 2,71 | 0         |
| ENSG00000259071 | ENSG00000259071 | 14 | 50326526  | 50327909  | lincRNA                            | 2,71 | 0,0358681 |
| ENSG00000263006 | ROCK1P1         | 18 | 109065    | 122219    | transcribed_unprocessed_pseudogene | 2,71 | 3,30E-03  |
| ENSG00000215102 | TERF1P4         | X  | 83748825  | 83749939  | processed_pseudogene               | 2,71 | 1,40E-02  |
| ENSG00000230912 | ENSG00000230912 | 22 | 38666508  | 38668750  | antisense                          | 2,70 | 7,06E-02  |
| ENSG00000204556 | ENSG00000204556 | 20 | 26018832  | 26020684  | unprocessed_pseudogene             | 2,70 | 7,06E-02  |
| ENSG00000226465 | ENSG00000226465 | 20 | 25751218  | 25752761  | antisense                          | 2,70 | 0,2161218 |
| ENSG00000278035 | ENSG00000278035 | 20 | 36233851  | 36234297  | lincRNA                            | 2,70 | 7,06E-02  |
| ENSG00000266936 | ENSG00000266936 | 19 | 11010917  | 11016011  | antisense                          | 2,70 | 7,06E-02  |
| ENSG00000268621 | ENSG00000268621 | 19 | 46189166  | 46203083  | lincRNA                            | 2,70 | 0,2161218 |
| ENSG00000269802 | ENSG00000269802 | 19 | 6343761   | 6362149   | antisense                          | 2,70 | 0,2161218 |
| ENSG00000262228 | ENSG00000262228 | 17 | 763565    | 765319    | lincRNA                            | 2,70 | 0,2161218 |
| ENSG00000265010 | ENSG00000265010 | 17 | 73243093  | 73244706  | sense_intronic                     | 2,70 | 7,06E-02  |
| ENSG00000265800 | ENSG00000265800 | 17 | 75138416  | 75141350  | sense_intronic                     | 2,70 | 7,06E-02  |
| ENSG00000265971 | ENSG00000265971 | 17 | 63454993  | 63455817  | lincRNA                            | 2,70 | 0,2161218 |
| ENSG00000267369 | ENSG00000267369 | 17 | 35498218  | 35499175  | processed_pseudogene               | 2,70 | 0,2161218 |
| ENSG00000267644 | ENSG00000267644 | 17 | 28219285  | 28220005  | lincRNA                            | 2,70 | 0,2161218 |
| ENSG00000277382 | ENSG00000277382 | 17 | 76709760  | 76710045  | antisense                          | 2,70 | 0,2161218 |
| ENSG00000260420 | ENSG00000260420 | 16 | 88194281  | 88195217  | lincRNA                            | 2,70 | 7,06E-02  |
| ENSG00000260671 | ENSG00000260671 | 16 | 87739771  | 87747706  | sense_intronic                     | 2,70 | 1,40E-02  |
| ENSG00000260908 | ENSG00000260908 | 16 | 29053732  | 29108108  | transcribed_unprocessed_pseudogene | 2,70 | 0         |

|                 |                 |    |           |           |                                    |      |           |
|-----------------|-----------------|----|-----------|-----------|------------------------------------|------|-----------|
| ENSG00000260927 | ENSG00000260927 | 16 | 58129529  | 58159133  | antisense                          | 2,70 | 0,2161218 |
| ENSG00000270006 | ENSG00000270006 | 16 | 87317509  | 87318043  | antisense                          | 2,70 | 7,06E-02  |
| ENSG00000243404 | RPL35AP32       | 15 | 66446455  | 66446777  | processed_pseudogene               | 2,70 | 0,2161218 |
| ENSG00000260685 | ENSG00000260685 | 15 | 75950464  | 75951144  | processed_pseudogene               | 2,70 | 0,2161218 |
| ENSG00000254016 | ALG1L10P        | 12 | 8227734   | 8231764   | unprocessed_pseudogene             | 2,70 | 0         |
| ENSG00000255966 | ENSG00000255966 | 12 | 6532290   | 6533498   | antisense                          | 2,70 | 7,06E-02  |
| ENSG00000224295 | OLFM5P          | 11 | 5518441   | 5524955   | unprocessed_pseudogene             | 2,70 | 0         |
| ENSG00000270972 | ENSG00000270972 | 11 | 333192    | 333688    | lincRNA                            | 2,70 | 0,2161218 |
| ENSG00000227076 | ENSG00000227076 | 10 | 127934698 | 127936167 | sense_intronic                     | 2,70 | 7,06E-02  |
| ENSG00000231920 | NEBL-AS1        | 10 | 21174014  | 21175048  | antisense                          | 2,70 | 0,2161218 |
| ENSG00000234256 | PTCD2P2         | 10 | 88876450  | 88877544  | processed_pseudogene               | 2,70 | 1,40E-02  |
| ENSG00000235618 | FAM21EP         | 10 | 50021182  | 50067803  | transcribed_unprocessed_pseudogene | 2,70 | 7,06E-02  |
| ENSG00000237949 | LINC00844       | 10 | 58999626  | 59001543  | lincRNA                            | 2,70 | 1,40E-02  |
| ENSG00000272319 | ENSG00000272319 | 10 | 42579724  | 42579858  | unprocessed_pseudogene             | 2,70 | 1,40E-02  |
| ENSG00000270917 | ENSG00000270917 | 9  | 120812475 | 120812845 | processed_pseudogene               | 2,70 | 1,40E-02  |
| ENSG00000214733 | ENSG00000214733 | 8  | 143788920 | 143790459 | antisense                          | 2,70 | 0,2161218 |
| ENSG00000223893 | GNL2P1          | 7  | 49942251  | 49944440  | processed_pseudogene               | 2,70 | 0,2161218 |
| ENSG00000249574 | ENSG00000249574 | 7  | 379359    | 382712    | lincRNA                            | 2,70 | 1,40E-02  |
| ENSG00000240003 | RPL7P24         | 5  | 80500332  | 80501400  | processed_pseudogene               | 2,70 | 0,2161218 |
| ENSG00000248968 | ENSG00000248968 | 5  | 10248325  | 10249915  | antisense                          | 2,70 | 7,06E-02  |
| ENSG00000251139 | ENSG00000251139 | 4  | 184813619 | 184821300 | antisense                          | 2,70 | 7,06E-02  |
| ENSG00000261496 | ENSG00000261496 | 4  | 86012296  | 86013874  | sense_overlapping                  | 2,70 | 0,2161218 |
| ENSG00000223899 | SEC13P1         | 3  | 33033863  | 33034810  | processed_pseudogene               | 2,70 | 0,2161218 |
| ENSG00000239483 | RPS15AP16       | 3  | 128798841 | 128799201 | processed_pseudogene               | 2,70 | 1,40E-02  |
| ENSG00000243429 | OR7E29P         | 3  | 125712139 | 125713045 | unprocessed_pseudogene             | 2,70 | 0,2161218 |
| ENSG00000244327 | ENSG00000244327 | 3  | 142465315 | 142472337 | sense_overlapping                  | 2,70 | 0         |
| ENSG00000270135 | ENSG00000270135 | 3  | 169793495 | 169793966 | antisense                          | 2,70 | 1,40E-02  |
| ENSG00000224425 | ENSG00000224425 | 2  | 131352214 | 131353239 | processed_pseudogene               | 2,70 | 1,40E-02  |
| ENSG00000215811 | BTNL10          | 1  | 228508655 | 228512305 | unprocessed_pseudogene             | 2,70 | 7,06E-02  |
| ENSG00000224690 | UBE2D3P3        | 1  | 150800473 | 150801031 | processed_pseudogene               | 2,70 | 0,2161218 |
| ENSG00000229021 | ENSG00000229021 | 1  | 151994531 | 152042774 | antisense                          | 2,70 | 7,06E-02  |
| ENSG00000229901 | ENSG00000229901 | 1  | 41375004  | 41375669  | antisense                          | 2,70 | 0,2161218 |
| ENSG00000235308 | ENSG00000235308 | 1  | 88923370  | 88923844  | processed_pseudogene               | 2,70 | 0,2161218 |
| ENSG00000239873 | GAPDHP27        | 1  | 119558755 | 119559774 | processed_pseudogene               | 2,70 | 0,2161218 |
| ENSG00000231728 | ENSG00000231728 | X  | 103917411 | 103919548 | antisense                          | 2,70 | 0         |
| ENSG00000237903 | ENSG00000237903 | X  | 119422917 | 119423547 | sense_intronic                     | 2,70 | 7,06E-02  |
| ENSG00000270497 | ENSG00000270497 | X  | 53065053  | 53065548  | processed_pseudogene               | 2,70 | 0,2161218 |
| ENSG00000259642 | ST20-AS1        | 15 | 79922771  | 79926993  | antisense                          | 2,70 | 3,30E-03  |
| ENSG00000226329 | ENSG00000226329 | 7  | 22863874  | 22881350  | unprocessed_pseudogene             | 2,69 | 0,3318209 |
| ENSG00000270761 | ENSG00000270761 | 6  | 47477243  | 47477572  | lincRNA                            | 2,69 | 0,1836819 |
| ENSG00000224043 | CCNT2-AS1       | 2  | 134735464 | 134918710 | antisense                          | 2,69 | 6,27E-03  |
| ENSG00000221990 | EXOC3-AS1       | 5  | 441498    | 443160    | antisense                          | 2,69 | 1,40E-02  |
| ENSG00000230750 | SDAD1P2         | 20 | 10385779  | 10387806  | processed_pseudogene               | 2,69 | 2,21E-02  |
| ENSG00000267319 | ENSG00000267319 | 19 | 37693280  | 37693564  | processed_pseudogene               | 2,69 | 6,27E-03  |
| ENSG00000213871 | TAF9BP1         | 3  | 25754925  | 25755670  | processed_pseudogene               | 2,69 | 0,1836819 |
| ENSG00000251669 | FAM86EP         | 4  | 3941760   | 3955419   | transcribed_unprocessed_pseudogene | 2,69 | 1,40E-02  |
| ENSG00000270179 | ENSG00000270179 | 11 | 113368478 | 113369117 | sense_intronic                     | 2,68 | 1,40E-02  |
| ENSG00000225177 | ENSG00000225177 | 6  | 138692548 | 138697288 | antisense                          | 2,68 | 0,2746192 |
| ENSG00000240225 | ZNF542P         | 19 | 56368099  | 56379828  | transcribed_unprocessed_pseudogene | 2,67 | 1,40E-02  |
| ENSG00000139239 | RPL14P1         | 12 | 62965325  | 62965969  | processed_pseudogene               | 2,67 | 9,18E-02  |
| ENSG00000275763 | C18orf65        | 18 | 76495521  | 76498088  | lincRNA                            | 2,67 | 1,40E-02  |
| ENSG00000261465 | ENSG00000261465 | 16 | 19062499  | 19067691  | antisense                          | 2,67 | 0         |

|                 |                 |    |           |           |                                        |      |           |
|-----------------|-----------------|----|-----------|-----------|----------------------------------------|------|-----------|
| ENSG00000225913 | ENSG00000225913 | 10 | 87607985  | 87659279  | lincRNA                                | 2,67 | 0,4332376 |
| ENSG00000231367 | ENSG00000231367 | 2  | 38406719  | 38515740  | lincRNA                                | 2,67 | 0,3565078 |
| ENSG00000196922 | ZNF252P         | 8  | 144973589 | 145002895 | unitary_pseudogene                     | 2,66 | 0         |
| ENSG00000237149 | ZNF503-AS2      | 10 | 75401519  | 75408982  | antisense                              | 2,66 | 2,21E-02  |
| ENSG00000267809 | NDUFV2P1        | 19 | 53223973  | 53224879  | processed_pseudogene                   | 2,66 | 6,27E-03  |
| ENSG00000235652 | ENSG00000235652 | 6  | 145799409 | 145886585 | antisense                              | 2,66 | 0         |
| ENSG00000267774 | ENSG00000267774 | 18 | 59696459  | 59698111  | antisense                              | 2,65 | 0         |
| ENSG00000163597 | SNHG16          | 17 | 76557766  | 76565348  | processed_transcript                   | 2,65 | 0,0358681 |
| ENSG00000154608 | CEP170P1        | 4  | 118467590 | 118554204 | transcribed_unprocess<br>ed_pseudogene | 2,65 | 0         |
| ENSG00000227617 | CERS6-AS1       | 2  | 168771953 | 168786961 | processed_transcript                   | 2,65 | 0         |
| ENSG00000235859 | ENSG00000235859 | 7  | 30371508  | 30372741  | processed_pseudogene                   | 2,65 | 9,18E-02  |
| ENSG00000228903 | RASA4CP         | 7  | 44026951  | 44041892  | transcribed_unprocess<br>ed_pseudogene | 2,65 | 3,30E-03  |
| ENSG00000274499 | ENSG00000274499 | 15 | 20803505  | 20826173  | transcribed_processed_<br>pseudogene   | 2,64 | 0,2746192 |
| ENSG00000213740 | SERBP1P1        | X  | 68783472  | 68785066  | processed_pseudogene                   | 2,64 | 0         |
| ENSG00000271631 | ENSG00000271631 | 9  | 112885158 | 112885767 | antisense                              | 2,64 | 0,1836819 |
| ENSG00000224855 | OPA1-AS1        | 3  | 193618609 | 193627337 | antisense                              | 2,64 | 0         |
| ENSG00000276578 | ENSG00000276578 | 19 | 56485923  | 56494280  | unprocessed_pseudoge<br>ne             | 2,63 | 1,95E-02  |
| ENSG00000240445 | FOXO3B          | 17 | 18670946  | 18672873  | processed_pseudogene                   | 2,63 | 0         |
| ENSG00000259298 | ENSG00000259298 | 15 | 50497195  | 50498744  | antisense                              | 2,63 | 0         |
| ENSG00000255621 | ENSG00000255621 | 12 | 13000451  | 13040679  | lincRNA                                | 2,63 | 0,2161218 |
| ENSG00000261668 | ENSG00000261668 | 4  | 127840198 | 127844040 | antisense                              | 2,63 | 0,4332376 |
| ENSG00000235084 | CHCHD2P6        | 1  | 15604597  | 15605043  | processed_pseudogene                   | 2,62 | 0,2161218 |
| ENSG00000181819 | KCTD9P2         | X  | 105405647 | 105407039 | processed_pseudogene                   | 2,62 | 0         |
| ENSG00000236790 | LINC00299       | 2  | 8007771   | 8383621   | lincRNA                                | 2,62 | 0,0358681 |
| ENSG00000267199 | ENSG00000267199 | 18 | 12438890  | 12448205  | antisense                              | 2,61 | 2,21E-02  |
| ENSG00000266908 | ENSG00000266908 | 20 | 5499116   | 5502881   | lincRNA                                | 2,61 | 0         |
| ENSG00000270751 | ENSG00000270751 | 4  | 152337655 | 152338098 | antisense                              | 2,61 | 0         |
| ENSG00000212664 | ENSG00000212664 | 15 | 71341158  | 71341712  | processed_pseudogene                   | 2,61 | 1,95E-02  |
| ENSG00000213209 | ENSG00000213209 | 7  | 148637179 | 148637587 | processed_pseudogene                   | 2,60 | 0,1392851 |
| ENSG00000235837 | ENSG00000235837 | 7  | 16695871  | 16719898  | antisense                              | 2,60 | 2,21E-02  |
| ENSG00000237517 | DGCR5           | 22 | 18970514  | 19031242  | antisense                              | 2,60 | 0,2161218 |
| ENSG00000273442 | ENSG00000273442 | 22 | 17080701  | 17081456  | lincRNA                                | 2,60 | 7,06E-02  |
| ENSG00000281420 | ENSG00000281420 | 21 | 43748365  | 43748468  | pseudogene                             | 2,60 | 0,2161218 |
| ENSG00000167046 | ENSG00000167046 | 20 | 62640719  | 62643304  | antisense                              | 2,60 | 7,06E-02  |
| ENSG00000242325 | RPS12P31        | 19 | 32636078  | 32636475  | processed_pseudogene                   | 2,60 | 7,06E-02  |
| ENSG00000267296 | CEBPA-AS1       | 19 | 33302857  | 33305054  | antisense                              | 2,60 | 0,2161218 |
| ENSG00000264707 | L3MBTL4-AS1     | 18 | 6256747   | 6260934   | lincRNA                                | 2,60 | 7,06E-02  |
| ENSG00000261575 | ENSG00000261575 | 17 | 46267037  | 46268694  | transcribed_unprocess<br>ed_pseudogene | 2,60 | 0,2161218 |
| ENSG00000262223 | ENSG00000262223 | 17 | 81376001  | 81385360  | lincRNA                                | 2,60 | 0,2161218 |
| ENSG00000261889 | ENSG00000261889 | 16 | 3156736   | 3157483   | lincRNA                                | 2,60 | 0,2161218 |
| ENSG00000249839 | ENSG00000249839 | 15 | 43663654  | 43684339  | unprocessed_pseudoge<br>ne             | 2,60 | 1,40E-02  |
| ENSG00000259368 | ENSG00000259368 | 15 | 40368925  | 40369640  | antisense                              | 2,60 | 0         |
| ENSG00000259771 | ENSG00000259771 | 15 | 59266720  | 59271162  | sense_intronic                         | 2,60 | 0,2161218 |
| ENSG00000275332 | ENSG00000275332 | 15 | 64943240  | 64943672  | antisense                              | 2,60 | 0,2746192 |
| ENSG00000277152 | ENSG00000277152 | 15 | 66860303  | 66867023  | lincRNA                                | 2,60 | 0,2161218 |
| ENSG00000234911 | TEX21P          | 14 | 64346171  | 64374666  | unitary_pseudogene                     | 2,60 | 0         |
| ENSG00000258458 | ENSG00000258458 | 14 | 22702611  | 22766562  | processed_transcript                   | 2,60 | 0         |
| ENSG00000258867 | LINC01146       | 14 | 88024550  | 88097619  | lincRNA                                | 2,60 | 7,06E-02  |
| ENSG00000270062 | ENSG00000270062 | 14 | 50723777  | 50724272  | sense_intronic                         | 2,60 | 1,40E-02  |
| ENSG00000224418 | STK24-AS1       | 13 | 98577244  | 98578830  | antisense                              | 2,60 | 0,2161218 |
| ENSG00000235280 | MCF2L-AS1       | 13 | 112967484 | 112968824 | antisense                              | 2,60 | 0,2161218 |
| ENSG00000225342 | ENSG00000225342 | 12 | 40186009  | 40224915  | antisense                              | 2,60 | 0,2161218 |
| ENSG00000256888 | ENSG00000256888 | 12 | 10750234  | 10777444  | lincRNA                                | 2,60 | 0,2161218 |
| ENSG00000258210 | ENSG00000258210 | 12 | 110387463 | 110445548 | processed_transcript                   | 2,60 | 7,06E-02  |
| ENSG00000254463 | ENSG00000254463 | 11 | 43466392  | 43466871  | processed_pseudogene                   | 2,60 | 0,2161218 |

|                 |                 |    |           |           |                                    |      |           |
|-----------------|-----------------|----|-----------|-----------|------------------------------------|------|-----------|
| ENSG00000268472 | ENSG00000268472 | 11 | 112260265 | 112261396 | antisense                          | 2,60 | 7,06E-02  |
| ENSG00000212952 | ENSG00000212952 | 9  | 42568865  | 42569315  | processed_pseudogene               | 2,60 | 0,2161218 |
| ENSG00000225411 | ENSG00000225411 | 9  | 63802144  | 63814159  | lincRNA                            | 2,60 | 0,2161218 |
| ENSG00000206014 | OR7E161P        | 8  | 11928597  | 11929563  | unprocessed_pseudogene             | 2,60 | 0,2161218 |
| ENSG00000248159 | HSPA8P11        | 8  | 30237382  | 30240997  | processed_pseudogene               | 2,60 | 0,2161218 |
| ENSG00000254948 | OR7E158P        | 8  | 11919900  | 11920809  | unprocessed_pseudogene             | 2,60 | 0,2161218 |
| ENSG00000255052 | FAM66D          | 8  | 12115782  | 12177550  | antisense                          | 2,60 | 0         |
| ENSG00000258256 | ENSG00000258256 | 8  | 85222446  | 85245717  | antisense                          | 2,60 | 7,06E-02  |
| ENSG00000231951 | ENSG00000231951 | 7  | 39609610  | 39610290  | antisense                          | 2,60 | 7,06E-02  |
| ENSG00000240499 | ENSG00000240499 | 7  | 122328469 | 122440388 | antisense                          | 2,60 | 0         |
| ENSG00000272953 | ENSG00000272953 | 7  | 5425770   | 5426401   | lincRNA                            | 2,60 | 0,2161218 |
| ENSG00000273297 | ENSG00000273297 | 7  | 134416290 | 134432453 | lincRNA                            | 2,60 | 7,06E-02  |
| ENSG00000214894 | LINC00243       | 6  | 30798654  | 30830659  | lincRNA                            | 2,60 | 0,2161218 |
| ENSG00000219392 | ENSG00000219392 | 6  | 28115628  | 28116551  | unprocessed_pseudogene             | 2,60 | 7,06E-02  |
| ENSG00000219395 | HSPA8P15        | 6  | 151411259 | 151413945 | processed_pseudogene               | 2,60 | 0,2161218 |
| ENSG00000225914 | ENSG00000225914 | 6  | 32255711  | 32265838  | antisense                          | 2,60 | 1,40E-02  |
| ENSG00000248464 | FGF10-AS1       | 5  | 44388732  | 44413989  | antisense                          | 2,60 | 1,40E-02  |
| ENSG00000248559 | ENSG00000248559 | 5  | 134399495 | 134401921 | antisense                          | 2,60 | 7,06E-02  |
| ENSG00000249068 | ENSG00000249068 | 5  | 109840128 | 109840692 | processed_pseudogene               | 2,60 | 1,40E-02  |
| ENSG00000250309 | ENSG00000250309 | 5  | 150670658 | 150672390 | antisense                          | 2,60 | 1,40E-02  |
| ENSG00000251000 | ENSG00000251000 | 5  | 95834424  | 95835046  | processed_pseudogene               | 2,60 | 7,06E-02  |
| ENSG00000272382 | ENSG00000272382 | 5  | 43033716  | 43034635  | lincRNA                            | 2,60 | 7,06E-02  |
| ENSG00000248399 | ENSG00000248399 | 4  | 2463797   | 2464124   | sense_intronic                     | 2,60 | 0         |
| ENSG00000251600 | ENSG00000251600 | 4  | 143912331 | 143982454 | lincRNA                            | 2,60 | 7,06E-02  |
| ENSG00000239804 | ENSG00000239804 | 3  | 125787888 | 125788146 | processed_pseudogene               | 2,60 | 1,40E-02  |
| ENSG00000248916 | NUP210P3        | 3  | 129323046 | 129325426 | unprocessed_pseudogene             | 2,60 | 0,2161218 |
| ENSG00000272989 | ENSG00000272989 | 3  | 197505262 | 197506986 | lincRNA                            | 2,60 | 7,06E-02  |
| ENSG00000276925 | ENSG00000276925 | 3  | 47469777  | 47469987  | processed_pseudogene               | 2,60 | 1,40E-02  |
| ENSG00000259056 | DUXAP1          | 2  | 84750769  | 84751231  | transcribed_unprocessed_pseudogene | 2,60 | 0,2161218 |
| ENSG00000272861 | ENSG00000272861 | 2  | 105249404 | 105249794 | lincRNA                            | 2,60 | 7,06E-02  |
| ENSG00000273763 | ENSG00000273763 | 2  | 65203571  | 65203813  | processed_pseudogene               | 2,60 | 7,06E-02  |
| ENSG00000229953 | ENSG00000229953 | 1  | 156646507 | 156661424 | antisense                          | 2,60 | 0,2161218 |
| ENSG00000268062 | TOP1P1          | 1  | 171345105 | 171345307 | processed_pseudogene               | 2,60 | 7,06E-02  |
| ENSG00000271267 | ENSG00000271267 | 1  | 155566050 | 155566306 | processed_pseudogene               | 2,60 | 0         |
| ENSG00000214558 | ENSG00000214558 | 6  | 65302522  | 65304957  | processed_pseudogene               | 2,59 | 0,1187106 |
| ENSG00000224722 | ENSG00000224722 | 8  | 127086263 | 127087510 | processed_pseudogene               | 2,59 | 2,95E-02  |
| ENSG00000238165 | ENSG00000238165 | 2  | 50829442  | 50829678  | processed_pseudogene               | 2,57 | 0         |
| ENSG00000226950 | DANCR           | 4  | 52712404  | 52720351  | processed_transcript               | 2,57 | 0,3318209 |
| ENSG00000223799 | IL10RB-AS1      | 21 | 33263873  | 33266260  | antisense                          | 2,57 | 2,21E-02  |
| ENSG00000276182 | ENSG00000276182 | 14 | 96537170  | 96537904  | sense_intronic                     | 2,57 | 0         |
| ENSG00000225022 | UBE2D3P1        | 20 | 5292388   | 5292831   | processed_pseudogene               | 2,57 | 0         |
| ENSG00000270108 | ENSG00000270108 | 14 | 103687576 | 103688127 | sense_intronic                     | 2,57 | 0         |
| ENSG00000261114 | ENSG00000261114 | 16 | 56941028  | 56941726  | sense_intronic                     | 2,57 | 6,27E-03  |
| ENSG00000244363 | RPL7P23         | 5  | 77582376  | 77583122  | processed_pseudogene               | 2,57 | 2,95E-02  |
| ENSG00000231999 | ENSG00000231999 | 1  | 89583241  | 89632894  | antisense                          | 2,56 | 0         |
| ENSG00000278075 | ENSG00000278075 | 18 | 79900555  | 79900903  | lincRNA                            | 2,55 | 0,0358681 |
| ENSG00000229750 | ENSG00000229750 | 2  | 175167904 | 175168522 | antisense                          | 2,55 | 6,27E-03  |
| ENSG00000219665 | ENSG00000219665 | 19 | 11987617  | 12046275  | processed_transcript               | 2,55 | 0,2161218 |
| ENSG00000254911 | SCARNA9         | 11 | 93721513  | 93721865  | antisense                          | 2,55 | 0,4332376 |
| ENSG00000254978 | ALG1L9P         | 11 | 71800541  | 71804640  | transcribed_unprocessed_pseudogene | 2,54 | 6,27E-03  |
| ENSG00000250299 | MRPS31P4        | 13 | 52600119  | 52637446  | transcribed_unprocessed_pseudogene | 2,54 | 1,40E-02  |
| ENSG00000254013 | MAP2K1P1        | 8  | 30027713  | 30028900  | processed_pseudogene               | 2,54 | 0,4332376 |
| ENSG00000228506 | ENSG00000228506 | 6  | 99424922  | 99431373  | antisense                          | 2,53 | 2,21E-02  |
| ENSG00000218283 | MORF4L1P1       | 1  | 220253570 | 220254536 | processed_pseudogene               | 2,52 | 0         |

|                 |                  |    |           |           |                                  |      |           |
|-----------------|------------------|----|-----------|-----------|----------------------------------|------|-----------|
| ENSG00000237447 | CDC27P2          | X  | 10190377  | 10192298  | processed_pseudogene             | 2,52 | 0         |
| ENSG00000271075 | ENSG00000271075  | 14 | 52871458  | 52872217  | processed_pseudogene             | 2,52 | 0         |
| ENSG00000213062 | ENSG00000213062  | 1  | 169486076 | 169486986 | lincRNA                          | 2,52 | 1,40E-02  |
| ENSG00000187653 | TMSB4XP8         | 4  | 90838903  | 90839037  | processed_pseudogene             | 2,51 | 0         |
| ENSG00000230769 | ENSG00000230769  | 22 | 40788777  | 40789267  | processed_pseudogene             | 2,50 | 0,2161218 |
| ENSG00000235091 | ENSG00000235091  | 22 | 45875999  | 45887748  | lincRNA                          | 2,50 | 1,40E-02  |
| ENSG00000281903 | ENSG00000281903  | 21 | 14819699  | 14918552  | lincRNA                          | 2,50 | 0         |
| ENSG00000230495 | ENSG00000230495  | 20 | 17599255  | 17599807  | processed_pseudogene             | 2,50 | 0,2161218 |
| ENSG00000272407 | ENSG00000272407  | 20 | 41196647  | 41196938  | transcribed_processed_pseudogene | 2,50 | 0,2161218 |
| ENSG00000278192 | ENSG00000278192  | 20 | 6065966   | 6067897   | lincRNA                          | 2,50 | 0,2161218 |
| ENSG00000267219 | ENSG00000267219  | 19 | 34348356  | 34359412  | antisense                        | 2,50 | 7,06E-02  |
| ENSG00000269102 | ENSG00000269102  | 19 | 52284780  | 52297920  | antisense                        | 2,50 | 0,2161218 |
| ENSG00000270317 | ENSG00000270317  | 19 | 22501699  | 22501948  | processed_pseudogene             | 2,50 | 7,06E-02  |
| ENSG00000273901 | ENSG00000273901  | 19 | 58500505  | 58501137  | antisense                        | 2,50 | 1,40E-02  |
| ENSG00000267717 | SRSF10P1         | 18 | 51158282  | 51159383  | processed_pseudogene             | 2,50 | 0,2161218 |
| ENSG00000273664 | ENSG00000273664  | 18 | 59700523  | 59700946  | lincRNA                          | 2,50 | 1,40E-02  |
| ENSG00000278330 | ENSG00000278330  | 18 | 77112602  | 77115726  | antisense                        | 2,50 | 0,2161218 |
| ENSG00000263164 | ENSG00000263164  | 17 | 5240508   | 5241543   | lincRNA                          | 2,50 | 7,06E-02  |
| ENSG00000264727 | ENSG00000264727  | 17 | 11288205  | 11290811  | lincRNA                          | 2,50 | 0,2161218 |
| ENSG00000266934 | ENSG00000266934  | 17 | 61382785  | 61384680  | sense_intronic                   | 2,50 | 0,2161218 |
| ENSG00000267648 | ENSG00000267648  | 17 | 35406948  | 35407818  | transcribed_processed_pseudogene | 2,50 | 7,06E-02  |
| ENSG00000260249 | ENSG00000260249  | 16 | 50666211  | 50671639  | antisense                        | 2,50 | 0         |
| ENSG00000260316 | ENSG00000260316  | 16 | 898967    | 905224    | sense_intronic                   | 2,50 | 7,06E-02  |
| ENSG00000260517 | ENSG00000260517  | 16 | 29116127  | 29217860  | lincRNA                          | 2,50 | 0,2161218 |
| ENSG00000260876 | LINC01229        | 16 | 79676108  | 79807922  | lincRNA                          | 2,50 | 7,06E-02  |
| ENSG00000166763 | STRCP1           | 15 | 43699488  | 43718184  | unprocessed_pseudogene           | 2,50 | 0,2161218 |
| ENSG00000259592 | PRELID1P4        | 15 | 35121573  | 35122084  | processed_pseudogene             | 2,50 | 7,06E-02  |
| ENSG00000259151 | CAP2P1           | 14 | 89290205  | 89291594  | transcribed_processed_pseudogene | 2,50 | 1,40E-02  |
| ENSG00000261553 | ENSG00000261553  | 13 | 75549773  | 75807120  | processed_transcript             | 2,50 | 0,3565078 |
| ENSG00000254397 | ENSG00000254397  | 11 | 9430356   | 9433486   | antisense                        | 2,50 | 0         |
| ENSG00000255236 | ENSG00000255236  | 11 | 68122053  | 68130518  | antisense                        | 2,50 | 7,06E-02  |
| ENSG00000226842 | ENSG00000226842  | 10 | 32281686  | 32282829  | antisense                        | 2,50 | 0,2161218 |
| ENSG00000232259 | ENSG00000232259  | 10 | 127929376 | 127934517 | lincRNA                          | 2,50 | 1,40E-02  |
| ENSG00000259267 | ENSG00000259267  | 10 | 70939053  | 70955641  | lincRNA                          | 2,50 | 7,06E-02  |
| ENSG00000226334 | ENSG00000226334  | 9  | 104927553 | 104928892 | antisense                        | 2,50 | 6,27E-03  |
| ENSG00000232850 | PTGES2-AS1       | 9  | 128128529 | 128130628 | lincRNA                          | 2,50 | 7,06E-02  |
| ENSG00000188365 | ENSG00000188365  | 7  | 5419846   | 5423122   | antisense                        | 2,50 | 7,06E-02  |
| ENSG00000226874 | ENSG00000226874  | 7  | 30544053  | 30544431  | processed_pseudogene             | 2,50 | 7,06E-02  |
| ENSG00000234185 | ENSG00000234185  | 7  | 66119603  | 66165011  | antisense                        | 2,50 | 0,2161218 |
| ENSG00000272752 | STAG3L5P-PVRIG2P | 7  | 100336104 | 100367831 | processed_transcript             | 2,50 | 7,06E-02  |
| ENSG00000231683 | ENSG00000231683  | 6  | 53561289  | 53617171  | lincRNA                          | 2,50 | 1,40E-02  |
| ENSG00000236475 | TRIM26BP         | 6  | 30238301  | 30242279  | unprocessed_pseudogene           | 2,50 | 0,2161218 |
| ENSG00000248367 | ENSG00000248367  | 5  | 180293245 | 180295253 | antisense                        | 2,50 | 7,06E-02  |
| ENSG00000249619 | HMG1N1P13        | 5  | 111572102 | 111572239 | processed_pseudogene             | 2,50 | 0,2161218 |
| ENSG00000213872 | ENSG00000213872  | 3  | 25749488  | 25749896  | processed_pseudogene             | 2,50 | 0,2161218 |
| ENSG00000261468 | ENSG00000261468  | 3  | 30697661  | 30699576  | sense_overlapping                | 2,50 | 7,06E-02  |
| ENSG00000233255 | ENSG00000233255  | 2  | 164840749 | 164849334 | antisense                        | 2,50 | 7,06E-02  |
| ENSG00000233397 | ENSG00000233397  | 2  | 162093429 | 162094854 | lincRNA                          | 2,50 | 0,2161218 |
| ENSG00000235848 | RMDN2-AS1        | 2  | 37949911  | 38067041  | antisense                        | 2,50 | 9,18E-02  |
| ENSG00000272754 | ENSG00000272754  | 2  | 32321638  | 32323002  | lincRNA                          | 2,50 | 0,2161218 |
| ENSG00000280721 | ENSG00000280721  | 2  | 87439523  | 87459044  | lincRNA                          | 2,50 | 0,2161218 |
| ENSG00000215089 | KRT18P11         | X  | 92459670  | 92460952  | processed_pseudogene             | 2,50 | 6,27E-03  |
| ENSG00000225071 | ENSG00000225071  | X  | 24429573  | 24429920  | processed_pseudogene             | 2,50 | 0,2161218 |
| ENSG00000219023 | ENSG00000219023  | 6  | 35555873  | 35556264  | processed_pseudogene             | 2,50 | 9,18E-02  |
| ENSG00000250068 | ENSG00000250068  | 9  | 112581779 | 112582590 | unprocessed_pseudogene           | 2,49 | 6,27E-03  |

|                 |                 |    |           |           |                                    |      |           |
|-----------------|-----------------|----|-----------|-----------|------------------------------------|------|-----------|
| ENSG00000232460 | BMPRIAPS2       | 11 | 121361854 | 121362865 | processed_pseudogene               | 2,48 | 0,1836819 |
| ENSG00000188825 | LINC00910       | 17 | 43369845  | 43389199  | lincRNA                            | 2,48 | 3,30E-03  |
| ENSG00000258427 | RBM8B           | 14 | 60397757  | 60398281  | processed_pseudogene               | 2,48 | 0         |
| ENSG00000235560 | ENSG00000235560 | 16 | 30534752  | 30537144  | antisense                          | 2,48 | 6,27E-03  |
| ENSG00000237399 | PITRM1-AS1      | 10 | 3141632   | 3167972   | antisense                          | 2,48 | 2,21E-02  |
| ENSG00000272323 | ENSG00000272323 | 5  | 34837549  | 34839278  | antisense                          | 2,46 | 2,95E-02  |
| ENSG00000268745 | ENSG00000268745 | 6  | 41791410  | 41791477  | antisense                          | 2,46 | 0,1217903 |
| ENSG00000233593 | ENSG00000233593 | 1  | 90782983  | 90851657  | lincRNA                            | 2,46 | 0,1392851 |
| ENSG00000197099 | ENSG00000197099 | 3  | 186579476 | 186772986 | antisense                          | 2,46 | 2,95E-02  |
| ENSG00000234383 | CTBP2P8         | 1  | 68161761  | 68163090  | processed_pseudogene               | 2,46 | 0         |
| ENSG00000259175 | ENSG00000259175 | 15 | 80554609  | 80562944  | antisense                          | 2,45 | 0,1836819 |
| ENSG00000255644 | ENSG00000255644 | 12 | 21759980  | 21766705  | antisense                          | 2,45 | 1,40E-02  |
| ENSG00000237461 | ENSG00000237461 | 9  | 99585786  | 99819889  | lincRNA                            | 2,45 | 0,0358681 |
| ENSG00000239650 | GUSBP4          | 6  | 57919784  | 57930291  | unprocessed_pseudogene             | 2,45 | 6,27E-03  |
| ENSG00000224479 | ENSG00000224479 | 3  | 63742293  | 63827445  | transcribed_unprocessed_pseudogene | 2,45 | 0,0358681 |
| ENSG00000228589 | SPCS2P4         | 1  | 28095742  | 28096422  | processed_pseudogene               | 2,45 | 0         |
| ENSG00000275441 | ENSG00000275441 | 16 | 28553709  | 28554140  | antisense                          | 2,44 | 6,27E-03  |
| ENSG00000233847 | ENSG00000233847 | 5  | 60917490  | 60919573  | antisense                          | 2,44 | 6,27E-03  |
| ENSG00000234630 | ENSG00000234630 | 22 | 22293733  | 22294794  | lincRNA                            | 2,44 | 2,95E-02  |
| ENSG00000265263 | ENSG00000265263 | 17 | 19334308  | 19336127  | antisense                          | 2,43 | 2,95E-02  |
| ENSG00000217289 | ENSG00000217289 | 2  | 129992889 | 129994040 | processed_pseudogene               | 2,43 | 2,21E-02  |
| ENSG00000237550 | RPL9P9          | 15 | 82372196  | 82372912  | transcribed_processed_pseudogene   | 2,43 | 1,40E-02  |
| ENSG00000276434 | ENSG00000276434 | 13 | 113339450 | 113339958 | sense_intronic                     | 2,43 | 7,06E-02  |
| ENSG00000216906 | ENSG00000216906 | 6  | 149904243 | 149906418 | processed_pseudogene               | 2,43 | 3,30E-03  |
| ENSG00000237655 | ENSG00000237655 | 2  | 177603089 | 177618572 | antisense                          | 2,43 | 6,27E-03  |
| ENSG00000269937 | ENSG00000269937 | 16 | 2561471   | 2565096   | antisense                          | 2,42 | 1,40E-02  |
| ENSG00000230513 | THAP7-AS1       | 22 | 21001886  | 21010342  | antisense                          | 2,42 | 0,4036702 |
| ENSG00000281106 | LINC00282       | 13 | 51813347  | 51845175  | lincRNA                            | 2,42 | 0,0358681 |
| ENSG00000244055 | ENSG00000244055 | 7  | 92457564  | 92491610  | antisense                          | 2,42 | 6,27E-03  |
| ENSG00000259660 | DNM1P47         | 15 | 101751032 | 101794302 | transcribed_unprocessed_pseudogene | 2,42 | 0         |
| ENSG00000251532 | ENSG00000251532 | 5  | 1544107   | 1551710   | lincRNA                            | 2,42 | 0,1836819 |
| ENSG00000186235 | ENSG00000186235 | 2  | 238224552 | 238231677 | processed_transcript               | 2,40 | 0,4036702 |
| ENSG00000240342 | RPS2P5          | 12 | 118246084 | 118246962 | processed_pseudogene               | 2,40 | 0,0358681 |
| ENSG00000273000 | ENSG00000273000 | 22 | 23652860  | 23717347  | processed_transcript               | 2,40 | 7,06E-02  |
| ENSG00000272825 | ENSG00000272825 | 21 | 44936303  | 44936954  | antisense                          | 2,40 | 7,06E-02  |
| ENSG00000230725 | ENSG00000230725 | 20 | 25140789  | 25149258  | lincRNA                            | 2,40 | 6,27E-03  |
| ENSG00000260536 | ENSG00000260536 | 20 | 32843128  | 32854257  | antisense                          | 2,40 | 7,06E-02  |
| ENSG00000130612 | CYP2G1P         | 19 | 40890826  | 40900508  | transcribed_unprocessed_pseudogene | 2,40 | 0,2161218 |
| ENSG00000268475 | ENSG00000268475 | 19 | 41425359  | 41426237  | antisense                          | 2,40 | 7,06E-02  |
| ENSG00000263627 | PPP4R1-AS1      | 18 | 9615264   | 9619363   | lincRNA                            | 2,40 | 0,2161218 |
| ENSG00000267000 | ENSG00000267000 | 18 | 59459072  | 59465682  | antisense                          | 2,40 | 0,2161218 |
| ENSG00000240270 | RPL12P37        | 17 | 80976454  | 80976948  | processed_pseudogene               | 2,40 | 7,06E-02  |
| ENSG00000260647 | ENSG00000260647 | 17 | 18268080  | 18268828  | antisense                          | 2,40 | 0,2161218 |
| ENSG00000263015 | ENSG00000263015 | 17 | 503171    | 511347    | antisense                          | 2,40 | 0,2161218 |
| ENSG00000264569 | ENSG00000264569 | 17 | 82037905  | 82039380  | antisense                          | 2,40 | 0,2161218 |
| ENSG00000265349 | ENSG00000265349 | 17 | 9638768   | 9645325   | antisense                          | 2,40 | 0,2161218 |
| ENSG00000276790 | ENSG00000276790 | 17 | 47279526  | 47280047  | antisense                          | 2,40 | 0,2161218 |
| ENSG00000260095 | ENSG00000260095 | 16 | 2452581   | 2452977   | antisense                          | 2,40 | 1,40E-02  |
| ENSG00000261216 | ENSG00000261216 | 16 | 11908208  | 11908916  | antisense                          | 2,40 | 1,40E-02  |
| ENSG00000262686 | GLIS2-AS1       | 16 | 4324667   | 4328340   | lincRNA                            | 2,40 | 0,2161218 |
| ENSG00000258712 | CXADRP2         | 15 | 21372793  | 21373881  | processed_pseudogene               | 2,40 | 7,06E-02  |
| ENSG00000259315 | ACTG1P17        | 15 | 82725873  | 82738904  | transcribed_processed_pseudogene   | 2,40 | 0,2161218 |
| ENSG00000259666 | LINGO1-AS1      | 15 | 77641764  | 77652288  | antisense                          | 2,40 | 0,2161218 |
| ENSG00000259921 | ENSG00000259921 | 15 | 99157231  | 99161140  | sense_intronic                     | 2,40 | 0,2161218 |
| ENSG00000258521 | ENSG00000258521 | 14 | 100339832 | 100340554 | antisense                          | 2,40 | 0,2161218 |

|                 |                 |    |           |           |                                        |      |           |
|-----------------|-----------------|----|-----------|-----------|----------------------------------------|------|-----------|
| ENSG00000258904 | ENSG00000258904 | 14 | 100263781 | 100265405 | sense_intronic                         | 2,40 | 1,40E-02  |
| ENSG00000275569 | ENSG00000275569 | 14 | 56305838  | 56306394  | antisense                              | 2,40 | 0,2161218 |
| ENSG00000233613 | DCUN1D2-AS      | 13 | 113468901 | 113476135 | antisense                              | 2,40 | 1,40E-02  |
| ENSG00000219355 | RPL31P52        | 12 | 120450437 | 120450803 | processed_pseudogene                   | 2,40 | 0,2161218 |
| ENSG00000255474 | ENSG00000255474 | 12 | 4700417   | 4720102   | lincRNA                                | 2,40 | 7,06E-02  |
| ENSG00000274737 | ENSG00000274737 | 12 | 47817451  | 47817966  | sense_intronic                         | 2,40 | 0         |
| ENSG00000278095 | ENSG00000278095 | 12 | 26273329  | 26273900  | antisense                              | 2,40 | 0,2161218 |
| ENSG00000273312 | ENSG00000273312 | 10 | 35606001  | 35608153  | antisense                              | 2,40 | 0,2161218 |
| ENSG00000213612 | FAM220CP        | 9  | 97121659  | 97122489  | processed_pseudogene                   | 2,40 | 0,2161218 |
| ENSG00000225472 | ENSG00000225472 | 9  | 14317085  | 14357908  | antisense                              | 2,40 | 0,2161218 |
| ENSG00000235387 | LINC00961       | 9  | 35909483  | 35911686  | lincRNA                                | 2,40 | 2,95E-02  |
| ENSG00000253708 | ENSG00000253708 | 8  | 30176554  | 30180888  | antisense                              | 2,40 | 0,2161218 |
| ENSG00000261670 | ENSG00000261670 | 8  | 103464389 | 103468985 | lincRNA                                | 2,40 | 0,2161218 |
| ENSG00000234450 | ENSG00000234450 | 7  | 156633355 | 156633787 | processed_pseudogene                   | 2,40 | 1,40E-02  |
| ENSG00000236976 | ENSG00000236976 | 7  | 64141538  | 64142401  | processed_pseudogene                   | 2,40 | 0,2161218 |
| ENSG00000239556 | ENSG00000239556 | 7  | 43984994  | 43990207  | transcribed_unprocess<br>ed_pseudogene | 2,40 | 0,2161218 |
| ENSG00000214922 | HLA-F-AS1       | 6  | 29726601  | 29749049  | processed_transcript                   | 2,40 | 0,2161218 |
| ENSG00000225415 | ENSG00000225415 | 6  | 138822747 | 138823799 | processed_pseudogene                   | 2,40 | 0,2161218 |
| ENSG00000234515 | PPP1R2P1        | 6  | 32879171  | 32879848  | transcribed_processed_<br>pseudogene   | 2,40 | 0,2161218 |
| ENSG00000237174 | ENSG00000237174 | 6  | 75357214  | 75399300  | antisense                              | 2,40 | 0,2161218 |
| ENSG00000230929 | ENSG00000230929 | 5  | 126628019 | 126628319 | processed_pseudogene                   | 2,40 | 1,40E-02  |
| ENSG00000253628 | ENSG00000253628 | 5  | 172816621 | 172819958 | lincRNA                                | 2,40 | 0,2161218 |
| ENSG00000253686 | LINC01484       | 5  | 173707614 | 173746211 | lincRNA                                | 2,40 | 1,40E-02  |
| ENSG00000246526 | ENSG00000246526 | 4  | 6687448   | 6690519   | lincRNA                                | 2,40 | 7,06E-02  |
| ENSG00000213431 | ENSG00000213431 | 3  | 100910975 | 100912175 | processed_pseudogene                   | 2,40 | 0,2161218 |
| ENSG00000244668 | SNRPCP3         | 3  | 150719997 | 150720836 | processed_pseudogene                   | 2,40 | 0,2161218 |
| ENSG00000244681 | MTHFD2P1        | 3  | 95654423  | 95683193  | transcribed_processed_<br>pseudogene   | 2,40 | 7,06E-02  |
| ENSG00000271856 | LINC01215       | 3  | 108125821 | 108138610 | lincRNA                                | 2,40 | 7,06E-02  |
| ENSG00000272699 | ENSG00000272699 | 3  | 179405448 | 179405944 | antisense                              | 2,40 | 0,2161218 |
| ENSG00000234281 | LANCL1-AS1      | 2  | 210324759 | 210469246 | antisense                              | 2,40 | 0,2161218 |
| ENSG00000243389 | ENSG00000243389 | 2  | 112589040 | 112614431 | 3prime_overlapping_nc<br>rna           | 2,40 | 0,2161218 |
| ENSG00000271825 | ENSG00000271825 | 2  | 177300600 | 177302006 | antisense                              | 2,40 | 0,2161218 |
| ENSG00000228955 | ENSG00000228955 | 1  | 246632251 | 246632478 | processed_pseudogene                   | 2,40 | 7,06E-02  |
| ENSG00000231407 | ENSG00000231407 | 1  | 170460453 | 170532647 | antisense                              | 2,40 | 0,2161218 |
| ENSG00000232022 | FAAHP1          | 1  | 46432129  | 46482493  | transcribed_unprocess<br>ed_pseudogene | 2,40 | 0,2161218 |
| ENSG00000238290 | ENSG00000238290 | 1  | 8026738   | 8122702   | lincRNA                                | 2,40 | 7,06E-02  |
| ENSG00000243960 | ENSG00000243960 | 1  | 111438638 | 111441364 | sense_overlapping                      | 2,40 | 7,06E-02  |
| ENSG00000271475 | ENSG00000271475 | 1  | 228776312 | 228776865 | processed_pseudogene                   | 2,40 | 0,2161218 |
| ENSG00000274386 | ENSG00000274386 | 1  | 42787990  | 42798230  | lincRNA                                | 2,40 | 1,40E-02  |
| ENSG00000233661 | SPIN4-AS1       | X  | 63349646  | 63352178  | antisense                              | 2,40 | 7,06E-02  |
| ENSG00000234557 | ENSG00000234557 | X  | 101443707 | 101444103 | processed_pseudogene                   | 2,40 | 1,40E-02  |
| ENSG00000232995 | ENSG00000232995 | 1  | 163244505 | 163321894 | antisense                              | 2,39 | 0,1392851 |
| ENSG00000227704 | ENSG00000227704 | 6  | 169725504 | 169738992 | antisense                              | 2,39 | 0,1836819 |
| ENSG00000233452 | STXBP5-AS1      | 6  | 146841901 | 147204614 | antisense                              | 2,39 | 3,30E-03  |
| ENSG00000255487 | ENSG00000255487 | 8  | 38275888  | 38276680  | antisense                              | 2,39 | 6,27E-03  |
| ENSG00000272529 | ENSG00000272529 | 3  | 16345126  | 16346440  | antisense                              | 2,39 | 0,3565078 |
| ENSG00000255340 | ENSG00000255340 | 11 | 43378882  | 43385671  | antisense                              | 2,39 | 0         |
| ENSG00000232332 | ENSG00000232332 | X  | 76029895  | 76030330  | processed_pseudogene                   | 2,38 | 0,0358681 |
| ENSG00000229204 | PTGES3P3        | 4  | 169791221 | 169791702 | processed_pseudogene                   | 2,38 | 2,95E-02  |
| ENSG00000268903 | ENSG00000268903 | 1  | 135141    | 135895    | processed_pseudogene                   | 2,38 | 0,1392851 |
| ENSG00000254662 | ENSG00000254662 | 11 | 57325603  | 57327958  | antisense                              | 2,37 | 2,21E-02  |
| ENSG00000227910 | ENSG00000227910 | 7  | 63924787  | 63926306  | transcribed_processed_<br>pseudogene   | 2,36 | 1,40E-02  |
| ENSG00000164621 | SMAD5-AS1       | 5  | 136129507 | 136134890 | antisense                              | 2,36 | 0,0358681 |
| ENSG00000256152 | ENSG00000256152 | 12 | 122865335 | 122867021 | lincRNA                                | 2,36 | 0,1836819 |
| ENSG00000260659 | ENSG00000260659 | 16 | 89226807  | 89228692  | antisense                              | 2,36 | 1,40E-02  |

|                 |                 |    |           |           |                                        |      |           |
|-----------------|-----------------|----|-----------|-----------|----------------------------------------|------|-----------|
| ENSG00000227888 | FAM66A          | 8  | 12362019  | 12388296  | lincRNA                                | 2,36 | 3,30E-03  |
| ENSG00000224040 | HMGN1P4         | 1  | 182942115 | 182942404 | processed_pseudogene                   | 2,35 | 1,95E-02  |
| ENSG00000281358 | RASSF1-AS1      | 3  | 50337511  | 50338300  | antisense                              | 2,35 | 0,0358681 |
| ENSG00000268112 | ENSG00000268112 | 19 | 17727840  | 17734513  | antisense                              | 2,35 | 3,30E-03  |
| ENSG00000244676 | ENSG00000244676 | 21 | 17793488  | 17810845  | antisense                              | 2,34 | 0         |
| ENSG00000220472 | ENSG00000220472 | 6  | 7338839   | 7339568   | processed_pseudogene                   | 2,34 | 6,27E-03  |
| ENSG00000266978 | ENSG00000266978 | 19 | 10252268  | 10285108  | antisense                              | 2,33 | 7,06E-02  |
| ENSG00000231296 | ENSG00000231296 | 1  | 40262672  | 40262984  | processed_pseudogene                   | 2,33 | 0,2161218 |
| ENSG00000254433 | ENSG00000254433 | 11 | 106085990 | 106101975 | antisense                              | 2,33 | 6,27E-03  |
| ENSG00000245468 | ENSG00000245468 | 4  | 7094571   | 7103385   | lincRNA                                | 2,32 | 7,06E-02  |
| ENSG00000260101 | ENSG00000260101 | 2  | 64522187  | 64524093  | lincRNA                                | 2,32 | 0,1836819 |
| ENSG00000271936 | ENSG00000271936 | 2  | 24825610  | 24826717  | antisense                              | 2,32 | 6,27E-03  |
| ENSG00000254295 | ENSG00000254295 | 5  | 172954907 | 172957162 | lincRNA                                | 2,31 | 0,1836819 |
| ENSG00000270714 | MINOS1P2        | 17 | 64747264  | 64747492  | processed_pseudogene                   | 2,31 | 9,18E-02  |
| ENSG00000231764 | DLX6-AS1        | 7  | 96955141  | 97014065  | antisense                              | 2,31 | 0,1836819 |
| ENSG00000255541 | ENSG00000255541 | 11 | 83209399  | 83209634  | processed_pseudogene                   | 2,31 | 0,2746192 |
| ENSG00000272154 | ENSG00000272154 | 5  | 141100242 | 141174391 | antisense                              | 2,31 | 0,2161218 |
| ENSG00000262587 | ENSG00000262587 | 16 | 25031744  | 25058109  | transcribed_unprocess<br>ed_pseudogene | 2,31 | 0,2161218 |
| ENSG00000255125 | ENSG00000255125 | 11 | 10783313  | 10801625  | antisense                              | 2,30 | 1,40E-02  |
| ENSG00000183822 | ENSG00000183822 | 22 | 36847372  | 36870441  | antisense                              | 2,30 | 7,06E-02  |
| ENSG00000270116 | ENSG00000270116 | 21 | 37100814  | 37101343  | sense_intronic                         | 2,30 | 0,2161218 |
| ENSG00000225246 | RPS2P1          | 20 | 34122470  | 34123290  | processed_pseudogene                   | 2,30 | 0,2161218 |
| ENSG00000229222 | KRT18P4         | 20 | 49956745  | 49958032  | processed_pseudogene                   | 2,30 | 0,2161218 |
| ENSG00000272945 | ENSG00000272945 | 20 | 34281632  | 34286466  | sense_intronic                         | 2,30 | 7,06E-02  |
| ENSG00000266897 | ENSG00000266897 | 19 | 13131571  | 13132410  | lincRNA                                | 2,30 | 0         |
| ENSG00000267138 | ENSG00000267138 | 19 | 3754620   | 3756659   | sense_intronic                         | 2,30 | 1,40E-02  |
| ENSG00000268392 | ENSG00000268392 | 19 | 57625032  | 57626950  | lincRNA                                | 2,30 | 7,06E-02  |
| ENSG00000268981 | ENSG00000268981 | 19 | 22665552  | 22716991  | antisense                              | 2,30 | 0,2161218 |
| ENSG00000265962 | GACAT2          | 18 | 8695856   | 8707621   | antisense                              | 2,30 | 0,2161218 |
| ENSG00000267108 | ENSG00000267108 | 18 | 12432897  | 12437635  | lincRNA                                | 2,30 | 0,2161218 |
| ENSG00000236234 | ENSG00000236234 | 17 | 45452844  | 45464065  | antisense                              | 2,30 | 1,40E-02  |
| ENSG00000236838 | ENSG00000236838 | 17 | 2213697   | 2214414   | antisense                              | 2,30 | 0,2161218 |
| ENSG00000260011 | ENSG00000260011 | 17 | 82381110  | 82382690  | lincRNA                                | 2,30 | 1,40E-02  |
| ENSG00000262492 | ENSG00000262492 | 17 | 7954868   | 7955622   | processed_pseudogene                   | 2,30 | 0,2161218 |
| ENSG00000277450 | ENSG00000277450 | 17 | 28373256  | 28373562  | sense_intronic                         | 2,30 | 0,2161218 |
| ENSG00000260541 | ENSG00000260541 | 16 | 1841020   | 1843547   | sense_overlapping                      | 2,30 | 7,06E-02  |
| ENSG00000261131 | ENSG00000261131 | 16 | 46660696  | 46661591  | sense_intronic                         | 2,30 | 7,06E-02  |
| ENSG00000260693 | ENSG00000260693 | 15 | 30540093  | 30545969  | lincRNA                                | 2,30 | 7,06E-02  |
| ENSG00000258580 | ENSG00000258580 | 14 | 32373337  | 32417974  | antisense                              | 2,30 | 0,2161218 |
| ENSG00000273565 | ENSG00000273565 | 14 | 75176929  | 75177418  | lincRNA                                | 2,30 | 0,2161218 |
| ENSG00000233532 | LINC00460       | 13 | 106376563 | 106378217 | lincRNA                                | 2,30 | 7,06E-02  |
| ENSG00000235205 | TATDN2P3        | 13 | 23243520  | 23247184  | processed_pseudogene                   | 2,30 | 0,2161218 |
| ENSG00000236953 | ZDHHC20-IT1     | 13 | 21376977  | 21377874  | sense_intronic                         | 2,30 | 7,06E-02  |
| ENSG00000250451 | HOXC-AS1        | 12 | 53999022  | 54000010  | antisense                              | 2,30 | 0,2161218 |
| ENSG00000256325 | ENSG00000256325 | 12 | 68828118  | 68828553  | antisense                              | 2,30 | 1,40E-02  |
| ENSG00000257475 | ENSG00000257475 | 12 | 53012104  | 53013921  | sense_intronic                         | 2,30 | 0,2161218 |
| ENSG00000229719 | MIR194-2HG      | 11 | 64889560  | 64893449  | lincRNA                                | 2,30 | 0,2161218 |
| ENSG00000231793 | DOC2GP          | 11 | 67612653  | 67616257  | unitary_pseudogene                     | 2,30 | 0,2161218 |
| ENSG00000254944 | ATP5F1P5        | 11 | 122960327 | 122961086 | processed_pseudogene                   | 2,30 | 0,2161218 |
| ENSG00000256779 | ENSG00000256779 | 11 | 95037482  | 95038456  | processed_pseudogene                   | 2,30 | 7,06E-02  |
| ENSG00000257058 | ENSG00000257058 | 11 | 62545999  | 62547699  | antisense                              | 2,30 | 0,2161218 |
| ENSG00000272301 | ENSG00000272301 | 11 | 76389648  | 76390128  | lincRNA                                | 2,30 | 0,2161218 |
| ENSG00000229298 | TUBB8P1         | 9  | 21811621  | 21812347  | processed_pseudogene                   | 2,30 | 0,2161218 |
| ENSG00000231995 | ENSG00000231995 | 9  | 62266319  | 62266919  | processed_pseudogene                   | 2,30 | 7,06E-02  |
| ENSG00000221845 | C7orf65         | 7  | 47655244  | 47661648  | lincRNA                                | 2,30 | 0,2161218 |
| ENSG00000232491 | SAPCD2P3        | 7  | 66556216  | 66557065  | processed_pseudogene                   | 2,30 | 0,2161218 |
| ENSG00000236703 | MYB-AS1         | 6  | 135195083 | 135195995 | antisense                              | 2,30 | 0         |
| ENSG00000271931 | ENSG00000271931 | 6  | 89080164  | 89080667  | antisense                              | 2,30 | 1,40E-02  |
| ENSG00000230847 | ENSG00000230847 | 5  | 71074225  | 71093193  | unprocessed_pseudoge<br>ne             | 2,30 | 0,2161218 |



|                 |                 |    |           |           |                                    |      |           |
|-----------------|-----------------|----|-----------|-----------|------------------------------------|------|-----------|
| ENSG00000253921 | ENSG00000253921 | 5  | 151753992 | 151767247 | antisense                          | 2,30 | 0         |
| ENSG00000272109 | ENSG00000272109 | 5  | 96804353  | 96806105  | antisense                          | 2,30 | 0,2161218 |
| ENSG00000255021 | ENSG00000255021 | 3  | 14272373  | 14303845  | lincRNA                            | 2,30 | 7,06E-02  |
| ENSG00000272334 | ENSG00000272334 | 3  | 36973117  | 36973672  | lincRNA                            | 2,30 | 0,2161218 |
| ENSG00000273682 | ENSG00000273682 | 3  | 46918807  | 46918935  | processed_pseudogene               | 2,30 | 1,40E-02  |
| ENSG00000180152 | ENSG00000180152 | 2  | 112853328 | 112854122 | processed_pseudogene               | 2,30 | 0,1836819 |
| ENSG00000232479 | ENSG00000232479 | 2  | 202924609 | 202925904 | processed_pseudogene               | 2,30 | 1,40E-02  |
| ENSG00000234174 | ENSG00000234174 | 2  | 113171535 | 113175360 | antisense                          | 2,30 | 0,2161218 |
| ENSG00000235192 | ENSG00000235192 | 2  | 165794851 | 165810010 | lincRNA                            | 2,30 | 0,2161218 |
| ENSG00000271151 | ENSG00000271151 | 2  | 173968351 | 173969418 | lincRNA                            | 2,30 | 0,2161218 |
| ENSG00000273240 | ENSG00000273240 | 2  | 189763859 | 189764456 | antisense                          | 2,30 | 7,06E-02  |
| ENSG00000223583 | ENSG00000223583 | 1  | 26454653  | 26455187  | processed_pseudogene               | 2,30 | 0,2161218 |
| ENSG00000231073 | ENSG00000231073 | 1  | 150973123 | 150975534 | antisense                          | 2,30 | 7,06E-02  |
| ENSG00000232993 | ENSG00000232993 | 1  | 53069938  | 53085502  | antisense                          | 2,30 | 7,06E-02  |
| ENSG00000237899 | ENSG00000237899 | 1  | 40669089  | 40687588  | lincRNA                            | 2,30 | 7,06E-02  |
| ENSG00000243659 | ENSG00000243659 | 1  | 27311240  | 27311838  | processed_pseudogene               | 2,30 | 7,06E-02  |
| ENSG00000271647 | KRT8P47         | 1  | 44103306  | 44104703  | processed_pseudogene               | 2,30 | 0,2161218 |
| ENSG00000277420 | ENSG00000277420 | 1  | 146514471 | 146525289 | lincRNA                            | 2,30 | 0,2161218 |
| ENSG00000234355 | FTH1P27         | X  | 37505310  | 37505860  | unprocessed_pseudogene             | 2,30 | 0,2161218 |
| ENSG00000272145 | NFYC-AS1        | 1  | 40690380  | 40692066  | antisense                          | 2,29 | 0         |
| ENSG00000272842 | ENSG00000272842 | 9  | 19371386  | 19371945  | antisense                          | 2,29 | 1,40E-02  |
| ENSG00000213526 | SETP8           | X  | 116963049 | 116963676 | processed_pseudogene               | 2,29 | 0,1217903 |
| ENSG00000265194 | ENSG00000265194 | 9  | 21858910  | 21861926  | antisense                          | 2,29 | 6,27E-03  |
| ENSG00000225075 | ENSG00000225075 | 1  | 112693688 | 112696621 | antisense                          | 2,28 | 1,40E-02  |
| ENSG00000226049 | TLK2P1          | 17 | 34036681  | 34039872  | processed_pseudogene               | 2,28 | 0         |
| ENSG00000266171 | ENSG00000266171 | 18 | 735746    | 737459    | antisense                          | 2,28 | 0         |
| ENSG00000215154 | ENSG00000215154 | 16 | 2603350   | 2630494   | transcribed_unprocessed_pseudogene | 2,28 | 9,18E-02  |
| ENSG00000250734 | ENSG00000250734 | 1  | 151612038 | 151613363 | antisense                          | 2,28 | 7,06E-02  |
| ENSG00000224699 | LAMTOR5-AS1     | 1  | 110347116 | 110443817 | processed_transcript               | 2,27 | 2,95E-02  |
| ENSG00000241213 | ENSG00000241213 | 3  | 117678693 | 117690932 | lincRNA                            | 2,27 | 0,1836819 |
| ENSG00000242670 | ENSG00000242670 | 4  | 54221126  | 54221472  | processed_pseudogene               | 2,27 | 0,1392851 |
| ENSG00000264273 | ENSG00000264273 | 17 | 18859354  | 18861466  | antisense                          | 2,26 | 4,86E-02  |
| ENSG00000231663 | ENSG00000231663 | 1  | 234372807 | 234373593 | antisense                          | 2,26 | 0,0358681 |
| ENSG00000228623 | ZNF883          | 9  | 112997120 | 113050043 | lincRNA                            | 2,25 | 0,0358681 |
| ENSG00000214535 | RPS15AP1        | 20 | 21166206  | 21166596  | processed_pseudogene               | 2,25 | 0,1836819 |
| ENSG00000270532 | PEBP1P2         | 2  | 85341281  | 85341838  | processed_pseudogene               | 2,24 | 0,0358681 |
| ENSG00000245293 | ENSG00000245293 | 4  | 107863479 | 107978799 | antisense                          | 2,24 | 2,95E-02  |
| ENSG00000247572 | CKMT2-AS1       | 5  | 81204084  | 81301560  | antisense                          | 2,23 | 0,0358681 |
| ENSG00000163016 | ALMS1P          | 2  | 73644919  | 73685576  | transcribed_unprocessed_pseudogene | 2,23 | 9,18E-02  |
| ENSG00000259813 | ENSG00000259813 | 16 | 88696501  | 88698610  | antisense                          | 2,23 | 0,2161218 |
| ENSG00000237854 | LINC00674       | 17 | 68101908  | 68115518  | transcribed_unprocessed_pseudogene | 2,22 | 0         |
| ENSG00000240005 | ENSG00000240005 | 4  | 26859806  | 26860599  | antisense                          | 2,21 | 0,2161218 |
| ENSG00000214439 | FAM185BP        | 7  | 77083886  | 77122116  | unprocessed_pseudogene             | 2,21 | 0         |
| ENSG00000231989 | PPP1R2P3        | 5  | 156850563 | 156851174 | processed_pseudogene               | 2,21 | 6,27E-03  |
| ENSG00000128262 | POM121L9P       | 22 | 24251828  | 24265525  | transcribed_unprocessed_pseudogene | 2,20 | 0,2161218 |
| ENSG00000232218 | ENSG00000232218 | 22 | 32386668  | 32386868  | unprocessed_pseudogene             | 2,20 | 0,2161218 |
| ENSG00000273243 | ENSG00000273243 | 22 | 45155539  | 45156011  | lincRNA                            | 2,20 | 1,40E-02  |
| ENSG00000225330 | ENSG00000225330 | 21 | 39630271  | 39726085  | sense_overlapping                  | 2,20 | 1,40E-02  |
| ENSG00000275142 | ENSG00000275142 | 20 | 19871891  | 19872284  | lincRNA                            | 2,20 | 0,2161218 |
| ENSG00000248830 | ZNF807          | 19 | 34542462  | 34545395  | unprocessed_pseudogene             | 2,20 | 0,2161218 |
| ENSG00000260599 | ENSG00000260599 | 19 | 22520995  | 22527949  | sense_intronic                     | 2,20 | 7,06E-02  |
| ENSG00000267045 | ENSG00000267045 | 19 | 45238632  | 45245370  | lincRNA                            | 2,20 | 0,2161218 |
| ENSG00000267778 | ENSG00000267778 | 19 | 1238179   | 1239522   | lincRNA                            | 2,20 | 7,06E-02  |

|                 |                 |    |           |           |                        |      |           |
|-----------------|-----------------|----|-----------|-----------|------------------------|------|-----------|
| ENSG00000271366 | ENSG00000271366 | 19 | 35251440  | 35253639  | antisense              | 2,20 | 0,2161218 |
| ENSG00000266256 | LINC00683       | 18 | 76615212  | 76625940  | lincRNA                | 2,20 | 0,2161218 |
| ENSG00000261320 | ENSG00000261320 | 16 | 67430667  | 67431464  | lincRNA                | 2,20 | 7,06E-02  |
| ENSG00000261442 | ENSG00000261442 | 16 | 4634329   | 4640623   | antisense              | 2,20 | 0,2161218 |
| ENSG00000261567 | ENSG00000261567 | 16 | 85357463  | 85359449  | lincRNA                | 2,20 | 7,06E-02  |
| ENSG00000261265 | ENSG00000261265 | 15 | 57527187  | 57529009  | lincRNA                | 2,20 | 7,06E-02  |
| ENSG00000276524 | ENSG00000276524 | 15 | 56887107  | 56888219  | lincRNA                | 2,20 | 0,2161218 |
| ENSG00000251602 | ENSG00000251602 | 14 | 105416884 | 105419739 | antisense              | 2,20 | 0,0358681 |
| ENSG00000258896 | SCOCP1          | 14 | 60158976  | 60159324  | processed_pseudogene   | 2,20 | 0,2161218 |
| ENSG00000240441 | ENSG00000240441 | 12 | 107719599 | 107720133 | processed_pseudogene   | 2,20 | 0,2161218 |
| ENSG00000249628 | LINC00942       | 12 | 1500525   | 1507318   | lincRNA                | 2,20 | 7,06E-02  |
| ENSG00000257735 | ENSG00000257735 | 12 | 48350945  | 48442411  | antisense              | 2,20 | 0,2161218 |
| ENSG00000257894 | ENSG00000257894 | 12 | 79341205  | 79503396  | lincRNA                | 2,20 | 0,2161218 |
| ENSG00000270095 | ENSG00000270095 | 12 | 123971457 | 123971714 | sense_intronic         | 2,20 | 0,2161218 |
| ENSG00000255409 | RSF1-IT1        | 11 | 77738680  | 77739568  | sense_intronic         | 2,20 | 7,06E-02  |
| ENSG00000255710 | ENSG00000255710 | 11 | 113820856 | 113821885 | processed_pseudogene   | 2,20 | 0,2161218 |
| ENSG00000204365 | C10orf126       | 10 | 28846408  | 28881898  | lincRNA                | 2,20 | 7,06E-02  |
| ENSG00000273372 | SFTPD-AS1       | 10 | 79968213  | 79973213  | antisense              | 2,20 | 0,2161218 |
| ENSG00000225684 | FAM225B         | 9  | 113103338 | 113111500 | lincRNA                | 2,20 | 7,06E-02  |
| ENSG00000231967 | ENSG00000231967 | 9  | 5356312   | 5356525   | processed_pseudogene   | 2,20 | 7,06E-02  |
| ENSG00000235641 | LINC00484       | 9  | 91159573  | 91165658  | lincRNA                | 2,20 | 1,40E-02  |
| ENSG00000236507 | ENSG00000236507 | 9  | 89801727  | 89803061  | lincRNA                | 2,20 | 0,2161218 |
| ENSG00000237886 | NALT1           | 9  | 136546212 | 136549893 | antisense              | 2,20 | 0,2161218 |
| ENSG00000254034 | ENSG00000254034 | 8  | 28798142  | 28799469  | antisense              | 2,20 | 1,40E-02  |
| ENSG00000254362 | ENSG00000254362 | 8  | 26440491  | 26442595  | sense_intronic         | 2,20 | 0,2161218 |
| ENSG00000254973 | ENSG00000254973 | 8  | 143758153 | 143771822 | lincRNA                | 2,20 | 0,2161218 |
| ENSG00000270923 | TAS2R6P         | 7  | 141787815 | 141788640 | processed_pseudogene   | 2,20 | 0,2161218 |
| ENSG00000215156 | ENSG00000215156 | 5  | 34190056  | 34193653  | processed_pseudogene   | 2,20 | 0,2161218 |
| ENSG00000249899 | ENSG00000249899 | 5  | 52932419  | 52990278  | antisense              | 2,20 | 0,2161218 |
| ENSG00000250635 | ENSG00000250635 | 5  | 139648999 | 139649728 | lincRNA                | 2,20 | 1,40E-02  |
| ENSG00000224786 | CETN4P          | 4  | 122730548 | 122732193 | unitary_pseudogene     | 2,20 | 1,40E-02  |
| ENSG00000249347 | ENSG00000249347 | 4  | 8990455   | 8990806   | processed_pseudogene   | 2,20 | 7,06E-02  |
| ENSG00000239462 | ENSG00000239462 | 3  | 98902424  | 99018562  | antisense              | 2,20 | 7,06E-02  |
| ENSG00000248773 | ENSG00000248773 | 3  | 140972744 | 140973255 | sense_intronic         | 2,20 | 7,06E-02  |
| ENSG00000224132 | ENSG00000224132 | 2  | 237257091 | 237257676 | lincRNA                | 2,20 | 0,2161218 |
| ENSG00000231903 | ENSG00000231903 | 2  | 202178660 | 202179391 | antisense              | 2,20 | 0,2161218 |
| ENSG00000270019 | ENSG00000270019 | 2  | 113888203 | 113889750 | lincRNA                | 2,20 | 0         |
| ENSG00000270659 | ENSG00000270659 | 2  | 213152970 | 213153659 | lincRNA                | 2,20 | 0,2161218 |
| ENSG00000225762 | LINC01389       | 1  | 47380928  | 47408477  | antisense              | 2,20 | 7,06E-02  |
| ENSG00000235121 | ENSG00000235121 | 1  | 201723294 | 201737506 | antisense              | 2,20 | 1,40E-02  |
| ENSG00000237457 | LINC01351       | 1  | 190478551 | 190480735 | lincRNA                | 2,20 | 0,2161218 |
| ENSG00000239670 | ENSG00000239670 | 1  | 32986952  | 32988233  | unprocessed_pseudogene | 2,20 | 7,06E-02  |
| ENSG00000269998 | ENSG00000269998 | 1  | 97933474  | 97941746  | lincRNA                | 2,20 | 0,2161218 |
| ENSG00000235806 | ENSG00000235806 | X  | 38770331  | 38799658  | lincRNA                | 2,20 | 7,06E-02  |
| ENSG00000259419 | HNRNPC3         | 15 | 79236332  | 79237206  | processed_pseudogene   | 2,20 | 0,0358681 |
| ENSG00000224769 | MUC20P1         | 3  | 195614947 | 195620233 | unprocessed_pseudogene | 2,20 | 9,18E-02  |
| ENSG00000231043 | ENSG00000231043 | 2  | 58460292  | 58462032  | processed_pseudogene   | 2,20 | 0,1836819 |
| ENSG00000213250 | RBMS2P1         | 12 | 94423744  | 94424969  | processed_pseudogene   | 2,19 | 0         |
| ENSG00000238171 | ENSG00000238171 | 2  | 181076051 | 181105968 | lincRNA                | 2,19 | 0,1217903 |
| ENSG00000248724 | NPHP3-AS1       | 3  | 132721750 | 132874223 | antisense              | 2,19 | 6,27E-03  |
| ENSG00000221817 | PPP3CB-AS1      | 10 | 73495525  | 73520070  | processed_transcript   | 2,18 | 0         |
| ENSG00000228889 | UBAC2-AS1       | 13 | 99196377  | 99200710  | lincRNA                | 2,18 | 0,1392851 |
| ENSG00000239917 | RPS10P16        | 8  | 117523271 | 117524061 | unprocessed_pseudogene | 2,18 | 0,1836819 |
| ENSG00000249955 | ENSG00000249955 | 4  | 169981747 | 169993806 | antisense              | 2,18 | 0,1836819 |
| ENSG00000247271 | ZBED5-AS1       | 11 | 10858259  | 10906802  | antisense              | 2,18 | 0,1392851 |
| ENSG00000237037 | NDUFA6-AS1      | 22 | 42090931  | 42137742  | processed_transcript   | 2,17 | 0,1392851 |
| ENSG00000214892 | USP8P1          | 6  | 31275572  | 31278754  | processed_pseudogene   | 2,17 | 0,0358681 |
| ENSG00000269984 | ENSG00000269984 | 3  | 169777192 | 169780334 | antisense              | 2,17 | 1,40E-02  |

|                 |                 |    |           |           |                                    |      |           |
|-----------------|-----------------|----|-----------|-----------|------------------------------------|------|-----------|
| ENSG00000236165 | PRADC1P1        | 3  | 36976316  | 36976840  | processed_pseudogene               | 2,16 | 0,1187106 |
| ENSG00000265415 | ENSG00000265415 | 17 | 59202677  | 59203829  | antisense                          | 2,16 | 4,86E-02  |
| ENSG00000271218 | ENSG00000271218 | 6  | 53918974  | 53920788  | antisense                          | 2,16 | 0,4036702 |
| ENSG00000259438 | ENSG00000259438 | 15 | 52010999  | 52019095  | lincRNA                            | 2,15 | 0,2161218 |
| ENSG00000231616 | ENSG00000231616 | 9  | 83831586  | 83868532  | antisense                          | 2,15 | 3,30E-03  |
| ENSG00000237513 | ENSG00000237513 | 7  | 104941063 | 104962334 | lincRNA                            | 2,15 | 0,1836819 |
| ENSG00000225215 | SMARCE1P1       | 11 | 107403404 | 107404589 | processed_pseudogene               | 2,15 | 1,40E-02  |
| ENSG00000236493 | EIF2S2P3        | 10 | 92668745  | 92669743  | processed_pseudogene               | 2,15 | 0,0358681 |
| ENSG00000229431 | ENSG00000229431 | 1  | 43385113  | 43389155  | antisense                          | 2,14 | 4,86E-02  |
| ENSG00000257386 | ENSG00000257386 | 12 | 74538145  | 74538633  | antisense                          | 2,14 | 3,30E-03  |
| ENSG00000234740 | ENSG00000234740 | 9  | 13274510  | 13279187  | sense_intronic                     | 2,14 | 0,3565078 |
| ENSG00000250877 | ENSG00000250877 | 4  | 72323028  | 72330751  | antisense                          | 2,14 | 2,21E-02  |
| ENSG00000237214 | ENSG00000237214 | 22 | 41064052  | 41064633  | processed_pseudogene               | 2,13 | 0,3565078 |
| ENSG00000267322 | SNHG22          | 18 | 49814023  | 49851059  | antisense                          | 2,13 | 2,95E-02  |
| ENSG00000177855 | CACYBPP2        | 2  | 183607442 | 183608119 | processed_pseudogene               | 2,13 | 2,95E-02  |
| ENSG00000253144 | ENSG00000253144 | 5  | 179082680 | 179083194 | processed_pseudogene               | 2,13 | 0,1836819 |
| ENSG00000227253 | ENSG00000227253 | 10 | 32266289  | 32269474  | antisense                          | 2,13 | 0,3318209 |
| ENSG00000237307 | SRRM1P3         | X  | 136976417 | 136985705 | processed_pseudogene               | 2,12 | 2,21E-02  |
| ENSG00000260461 | ENSG00000260461 | 10 | 103877374 | 103879761 | sense_overlapping                  | 2,12 | 6,27E-03  |
| ENSG00000230673 | PABPC1P3        | X  | 74583088  | 74583546  | processed_pseudogene               | 2,12 | 2,21E-02  |
| ENSG00000247675 | LRP4-AS1        | 11 | 46846412  | 46874396  | antisense                          | 2,12 | 7,06E-02  |
| ENSG00000267459 | ENSG00000267459 | 19 | 56377037  | 56377792  | transcribed_processed_pseudogene   | 2,12 | 4,86E-02  |
| ENSG00000262920 | ENSG00000262920 | 17 | 321392    | 322453    | antisense                          | 2,11 | 1,40E-02  |
| ENSG00000224324 | THAP5P1         | 7  | 158623188 | 158623449 | processed_pseudogene               | 2,11 | 3,30E-03  |
| ENSG00000237945 | LINC00649       | 21 | 33915534  | 33977691  | antisense                          | 2,11 | 0,0358681 |
| ENSG00000161132 | ENSG00000161132 | 22 | 20299760  | 20313216  | unprocessed_pseudogene             | 2,10 | 0,2161218 |
| ENSG00000230637 | ENSG00000230637 | 22 | 25327252  | 25339975  | unprocessed_pseudogene             | 2,10 | 1,40E-02  |
| ENSG00000235328 | ENSG00000235328 | 22 | 17093612  | 17093939  | processed_pseudogene               | 2,10 | 0         |
| ENSG00000261251 | ENSG00000261251 | 22 | 43812456  | 43817394  | antisense                          | 2,10 | 0,2161218 |
| ENSG00000273164 | ENSG00000273164 | 22 | 19023056  | 19023550  | sense_intronic                     | 2,10 | 1,40E-02  |
| ENSG00000273366 | ENSG00000273366 | 22 | 42278188  | 42278846  | lincRNA                            | 2,10 | 0,2161218 |
| ENSG00000231119 | ENSG00000231119 | 20 | 47352561  | 47354633  | antisense                          | 2,10 | 1,40E-02  |
| ENSG00000262497 | FAM187B2P       | 19 | 35232291  | 35233003  | unprocessed_pseudogene             | 2,10 | 0,2161218 |
| ENSG00000269085 | ENSG00000269085 | 19 | 16565551  | 16566330  | antisense                          | 2,10 | 7,06E-02  |
| ENSG00000267758 | ENSG00000267758 | 17 | 42268587  | 42269807  | antisense                          | 2,10 | 0,2161218 |
| ENSG00000261056 | ENSG00000261056 | 16 | 53298224  | 53299792  | transcribed_processed_pseudogene   | 2,10 | 7,06E-02  |
| ENSG00000261084 | PPP1R1AP2       | 16 | 35912120  | 35912516  | processed_pseudogene               | 2,10 | 7,06E-02  |
| ENSG00000261469 | ENSG00000261469 | 16 | 68236845  | 68237667  | sense_intronic                     | 2,10 | 0,2161218 |
| ENSG00000262312 | ENSG00000262312 | 16 | 3542739   | 3545785   | antisense                          | 2,10 | 0         |
| ENSG00000225151 | GOLGA2P7        | 15 | 84199311  | 84230136  | transcribed_unprocessed_pseudogene | 2,10 | 1,40E-02  |
| ENSG00000228036 | HSPD1P9         | 13 | 37993085  | 37994720  | processed_pseudogene               | 2,10 | 0,2161218 |
| ENSG00000235076 | GAPDHP52        | 13 | 21358373  | 21359314  | processed_pseudogene               | 2,10 | 7,06E-02  |
| ENSG00000257886 | ENSG00000257886 | 12 | 105072486 | 105074021 | antisense                          | 2,10 | 7,06E-02  |
| ENSG00000257999 | ENSG00000257999 | 12 | 105102472 | 105107179 | antisense                          | 2,10 | 0,2161218 |
| ENSG00000258096 | ENSG00000258096 | 12 | 46371463  | 46373778  | antisense                          | 2,10 | 0         |
| ENSG00000237233 | TMEM26-AS1      | 10 | 61452639  | 61481956  | antisense                          | 2,10 | 7,06E-02  |
| ENSG00000272489 | ENSG00000272489 | 10 | 79663192  | 79664786  | sense_intronic                     | 2,10 | 7,06E-02  |
| ENSG00000272912 | ENSG00000272912 | 10 | 102914585 | 102915404 | lincRNA                            | 2,10 | 0,2161218 |
| ENSG00000264527 | ENSG00000264527 | 9  | 136249971 | 136251205 | lincRNA                            | 2,10 | 7,06E-02  |
| ENSG00000273399 | ENSG00000273399 | 9  | 14586766  | 14587326  | lincRNA                            | 2,10 | 0,2161218 |
| ENSG00000275017 | ENSG00000275017 | 9  | 88391362  | 88391832  | processed_pseudogene               | 2,10 | 1,40E-02  |
| ENSG00000249258 | ENSG00000249258 | 8  | 17131181  | 17149789  | lincRNA                            | 2,10 | 0,2161218 |
| ENSG00000272425 | ENSG00000272425 | 8  | 81275399  | 81277570  | lincRNA                            | 2,10 | 0,2161218 |
| ENSG00000223969 | ENSG00000223969 | 7  | 90590619  | 90597353  | antisense                          | 2,10 | 0,2161218 |

|                 |                 |    |           |           |                                  |      |           |
|-----------------|-----------------|----|-----------|-----------|----------------------------------|------|-----------|
| ENSG00000251451 | GTF2IP9         | 7  | 66407288  | 66409239  | unprocessed_pseudogene           | 2,10 | 7,06E-02  |
| ENSG00000274080 | ENSG00000274080 | 7  | 73609262  | 73611502  | sense_intronic                   | 2,10 | 0,2161218 |
| ENSG00000216990 | HSPD1P10        | 6  | 87298772  | 87300447  | processed_pseudogene             | 2,10 | 0,2161218 |
| ENSG00000227803 | ENSG00000227803 | 6  | 20212087  | 20317739  | antisense                        | 2,10 | 1,40E-02  |
| ENSG00000234206 | ENSG00000234206 | 6  | 107509803 | 107511721 | antisense                        | 2,10 | 0,2161218 |
| ENSG00000271788 | ENSG00000271788 | 5  | 43006733  | 43007543  | lincRNA                          | 2,10 | 0,2161218 |
| ENSG00000260651 | ENSG00000260651 | 4  | 102500841 | 102501319 | antisense                        | 2,10 | 1,40E-02  |
| ENSG00000272646 | ENSG00000272646 | 4  | 182881777 | 182882203 | lincRNA                          | 2,10 | 0,2161218 |
| ENSG00000272885 | ENSG00000272885 | 4  | 416118    | 416537    | lincRNA                          | 2,10 | 7,06E-02  |
| ENSG00000227245 | ENSG00000227245 | 3  | 43087479  | 43088068  | lincRNA                          | 2,10 | 0,2161218 |
| ENSG00000228350 | CELSR3-AS1      | 3  | 48663776  | 48669174  | antisense                        | 2,10 | 0,2161218 |
| ENSG00000241120 | HMG1P8          | 3  | 167694355 | 167694642 | processed_pseudogene             | 2,10 | 0,2161218 |
| ENSG00000271716 | ENSG00000271716 | 3  | 11607184  | 11610748  | antisense                        | 2,10 | 0,2161218 |
| ENSG00000233392 | ENSG00000233392 | 2  | 240954617 | 240967451 | processed_transcript             | 2,10 | 7,06E-02  |
| ENSG00000233416 | ENSG00000233416 | 2  | 20606280  | 20606654  | processed_pseudogene             | 2,10 | 0,2161218 |
| ENSG00000234842 | MTCO2P16        | 2  | 201549631 | 201550307 | unprocessed_pseudogene           | 2,10 | 7,06E-02  |
| ENSG00000225891 | ENSG00000225891 | 1  | 26462756  | 26467282  | antisense                        | 2,10 | 7,06E-02  |
| ENSG00000226026 | ENSG00000226026 | 1  | 95163219  | 95233982  | antisense                        | 2,10 | 7,06E-02  |
| ENSG00000227712 | ENSG00000227712 | 1  | 119260265 | 119327303 | lincRNA                          | 2,10 | 7,06E-02  |
| ENSG00000231080 | ENSG00000231080 | 1  | 66826942  | 66828558  | antisense                        | 2,10 | 1,40E-02  |
| ENSG00000232862 | ENSG00000232862 | 1  | 36080066  | 36084026  | transcribed_processed_pseudogene | 2,10 | 7,06E-02  |
| ENSG00000234601 | CHRM3-AS1       | 1  | 239898016 | 239899872 | antisense                        | 2,10 | 7,06E-02  |
| ENSG00000254154 | ENSG00000254154 | 1  | 177928788 | 178038007 | processed_transcript             | 2,10 | 0,2161218 |
| ENSG00000270115 | ENSG00000270115 | 1  | 33261212  | 33261680  | lincRNA                          | 2,10 | 7,06E-02  |
| ENSG00000278504 | UPF3BP2         | X  | 119822906 | 119823043 | unprocessed_pseudogene           | 2,10 | 0,2161218 |
| ENSG00000226632 | UBE2V1P1        | 20 | 3361880   | 3362324   | processed_pseudogene             | 2,10 | 6,27E-03  |
| ENSG00000226361 | TERF1P5         | 13 | 18680494  | 18681700  | processed_pseudogene             | 2,09 | 0,0358681 |
| ENSG00000181524 | RPL24P4         | 6  | 42956345  | 42956765  | processed_pseudogene             | 2,09 | 0,4332376 |
| ENSG00000213938 | SEPHS1P6        | 2  | 199659551 | 199660729 | processed_pseudogene             | 2,09 | 2,21E-02  |
| ENSG00000234694 | ENSG00000234694 | 1  | 43354684  | 43358658  | antisense                        | 2,09 | 0,1836819 |
| ENSG00000225695 | HNRNPA1P35      | 2  | 201063089 | 201064051 | processed_pseudogene             | 2,08 | 9,18E-02  |
| ENSG00000205664 | ENSG00000205664 | X  | 3817528   | 3843857   | lincRNA                          | 2,08 | 6,27E-03  |
| ENSG00000257027 | ENSG00000257027 | 12 | 9658567   | 9662085   | sense_intronic                   | 2,07 | 6,27E-03  |
| ENSG00000280604 | PCBP3-OT1       | 21 | 45914296  | 45919483  | sense_overlapping                | 2,07 | 0,2746192 |
| ENSG00000224905 | ENSG00000224905 | 21 | 14027421  | 14144468  | antisense                        | 2,07 | 0,0358681 |
| ENSG00000282772 | ENSG00000282772 | 10 | 102845761 | 102854513 | antisense                        | 2,07 | 2,21E-02  |
| ENSG00000231504 | NMD3P2          | 7  | 56502284  | 56503044  | processed_pseudogene             | 2,06 | 7,06E-02  |
| ENSG00000235720 | ENSG00000235720 | 7  | 63893286  | 63894641  | processed_pseudogene             | 2,05 | 3,30E-03  |
| ENSG00000239718 | HLTF-AS1        | 3  | 149086332 | 149102823 | antisense                        | 2,05 | 0         |
| ENSG00000265749 | ENSG00000265749 | 17 | 8365563   | 8381328   | antisense                        | 2,04 | 9,18E-02  |
| ENSG00000226309 | SMARCE1P2       | 6  | 84429584  | 84430802  | processed_pseudogene             | 2,04 | 4,86E-02  |
| ENSG00000272195 | ENSG00000272195 | 1  | 244969350 | 244971088 | antisense                        | 2,03 | 4,86E-02  |
| ENSG00000279762 | ENSG00000279762 | 17 | 32423971  | 32446038  | antisense                        | 2,03 | 0,3565078 |
| ENSG00000229808 | ENSG00000229808 | 1  | 161890833 | 161892196 | transcribed_processed_pseudogene | 2,03 | 0,3318209 |
| ENSG00000248596 | ENSG00000248596 | 5  | 176143085 | 176199295 | lincRNA                          | 2,02 | 0,1836819 |
| ENSG00000253618 | GRPEL2-AS1      | 5  | 149348116 | 149357642 | antisense                        | 2,02 | 0,1217903 |
| ENSG00000234478 | ENSG00000234478 | 1  | 226148003 | 226155071 | antisense                        | 2,02 | 1,40E-02  |
| ENSG00000255857 | PXN-AS1         | 12 | 120201291 | 120213138 | antisense                        | 2,02 | 2,21E-02  |
| ENSG00000278932 | ENSG00000278932 | 21 | 9325013   | 9368775   | lincRNA                          | 2,02 | 0,1187106 |
| ENSG00000230360 | DDX10P2         | 9  | 82086155  | 82088768  | processed_pseudogene             | 2,01 | 0,1187106 |
| ENSG00000219928 | ENSG00000219928 | 9  | 87525302  | 87525475  | processed_pseudogene             | 2,01 | 4,86E-02  |
| ENSG00000245317 | ENSG00000245317 | 5  | 179859013 | 179861283 | lincRNA                          | 2,01 | 0,2161218 |
| ENSG00000247121 | ENSG00000247121 | 5  | 96814028  | 96935809  | antisense                        | 2,01 | 4,86E-02  |
| ENSG00000263266 | RPS7P1          | 17 | 28467822  | 28468406  | processed_pseudogene             | 2,00 | 2,21E-02  |
| ENSG00000231201 | ENSG00000231201 | 21 | 14971470  | 14992854  | antisense                        | 2,00 | 0,2161218 |
| ENSG00000236545 | ENSG00000236545 | 21 | 41870633  | 41872054  | antisense                        | 2,00 | 0,2161218 |

|                 |                 |    |           |           |                                  |      |           |
|-----------------|-----------------|----|-----------|-----------|----------------------------------|------|-----------|
| ENSG00000237989 | ENSG00000237989 | 21 | 43358147  | 43362349  | lincRNA                          | 2,00 | 1,40E-02  |
| ENSG00000275784 | ENSG00000275784 | 20 | 33989480  | 33991818  | lincRNA                          | 2,00 | 4,86E-02  |
| ENSG00000267117 | ENSG00000267117 | 19 | 55694118  | 55694558  | antisense                        | 2,00 | 0,2161218 |
| ENSG00000267264 | ENSG00000267264 | 19 | 27803538  | 27804060  | processed_pseudogene             | 2,00 | 7,06E-02  |
| ENSG00000267689 | ENSG00000267689 | 19 | 55705978  | 55706172  | processed_pseudogene             | 2,00 | 0,2161218 |
| ENSG00000268027 | ENSG00000268027 | 19 | 41545192  | 41555462  | lincRNA                          | 2,00 | 1,40E-02  |
| ENSG00000268416 | ENSG00000268416 | 19 | 20746923  | 20755250  | lincRNA                          | 2,00 | 0,2161218 |
| ENSG00000228979 | ENSG00000228979 | 17 | 63471604  | 63472093  | processed_pseudogene             | 2,00 | 0,2161218 |
| ENSG00000265683 | ENSG00000265683 | 17 | 27351858  | 27352584  | processed_pseudogene             | 2,00 | 0,2161218 |
| ENSG00000206168 | ENSG00000206168 | 16 | 231134    | 231472    | processed_pseudogene             | 2,00 | 2,21E-02  |
| ENSG00000221819 | GAS8-AS1        | 16 | 90028908  | 90029367  | antisense                        | 2,00 | 7,06E-02  |
| ENSG00000240793 | UBA52P8         | 16 | 48334471  | 48334854  | processed_pseudogene             | 2,00 | 0,3565078 |
| ENSG00000261227 | ENSG00000261227 | 16 | 73232055  | 73233970  | lincRNA                          | 2,00 | 0,2161218 |
| ENSG00000262488 | ENSG00000262488 | 16 | 10840384  | 10841544  | processed_pseudogene             | 2,00 | 0,2161218 |
| ENSG00000224441 | ENSG00000224441 | 15 | 90932586  | 90935130  | antisense                        | 2,00 | 0,2161218 |
| ENSG00000274294 | ENSG00000274294 | 15 | 99416584  | 99417204  | lincRNA                          | 2,00 | 0,2161218 |
| ENSG00000275601 | ENSG00000275601 | 15 | 43642389  | 43643023  | sense_intronic                   | 2,00 | 0,2161218 |
| ENSG00000180189 | HMGB1P14        | 14 | 58284773  | 58285363  | processed_pseudogene             | 2,00 | 7,06E-02  |
| ENSG00000251002 | ENSG00000251002 | 14 | 22380680  | 22482959  | processed_transcript             | 2,00 | 7,06E-02  |
| ENSG00000258413 | ENSG00000258413 | 14 | 55262767  | 55272075  | lincRNA                          | 2,00 | 0,4332376 |
| ENSG00000258450 | ENSG00000258450 | 14 | 49629291  | 49629890  | sense_intronic                   | 2,00 | 7,06E-02  |
| ENSG00000275198 | ENSG00000275198 | 14 | 90383365  | 90387973  | lincRNA                          | 2,00 | 1,40E-02  |
| ENSG00000272274 | LINC00551       | 13 | 106617810 | 106631359 | lincRNA                          | 2,00 | 0,2161218 |
| ENSG00000214659 | KRT8P26         | 11 | 65726939  | 65728214  | processed_pseudogene             | 2,00 | 0,1836819 |
| ENSG00000256443 | ENSG00000256443 | 11 | 61539516  | 61542259  | lincRNA                          | 2,00 | 0,2161218 |
| ENSG00000227518 | ENSG00000227518 | 9  | 27657     | 30891     | antisense                        | 2,00 | 7,06E-02  |
| ENSG00000244757 | ENSG00000244757 | 9  | 116288618 | 116318689 | antisense                        | 2,00 | 7,06E-02  |
| ENSG00000254231 | ENSG00000254231 | 8  | 86333274  | 86343314  | processed_transcript             | 2,00 | 0,2161218 |
| ENSG00000225173 | ENSG00000225173 | 6  | 28837869  | 28839006  | lincRNA                          | 2,00 | 0,2161218 |
| ENSG00000227885 | ENSG00000227885 | 6  | 53740749  | 53747022  | lincRNA                          | 2,00 | 1,40E-02  |
| ENSG00000261080 | ENSG00000261080 | 6  | 45573346  | 45576770  | lincRNA                          | 2,00 | 7,06E-02  |
| ENSG00000272009 | ENSG00000272009 | 6  | 28078792  | 28081130  | antisense                        | 2,00 | 0,2161218 |
| ENSG00000249129 | SUDS3P1         | 5  | 177971316 | 177972281 | processed_pseudogene             | 2,00 | 0         |
| ENSG00000250900 | ENSG00000250900 | 5  | 181195496 | 181203103 | antisense                        | 2,00 | 0,2161218 |
| ENSG00000229585 | RPL21P44        | 4  | 53986587  | 53987058  | processed_pseudogene             | 2,00 | 0,2161218 |
| ENSG00000249138 | ENSG00000249138 | 4  | 184798296 | 184799046 | transcribed_processed_pseudogene | 2,00 | 0,2161218 |
| ENSG00000251155 | SEPT14P4        | 4  | 118640673 | 118640858 | processed_pseudogene             | 2,00 | 0,2161218 |
| ENSG00000254094 | ENSG00000254094 | 4  | 1356581   | 1358075   | sense_intronic                   | 2,00 | 0,2161218 |
| ENSG00000205955 | HSP90AA5P       | 3  | 184115352 | 184117898 | transcribed_processed_pseudogene | 2,00 | 0,2161218 |
| ENSG00000233912 | ENSG00000233912 | 3  | 5156905   | 5187329   | antisense                        | 2,00 | 0,2161218 |
| ENSG00000235904 | RBMS3-AS3       | 3  | 29264194  | 29290726  | antisense                        | 2,00 | 0,2161218 |
| ENSG00000240497 | ENSG00000240497 | 3  | 171468084 | 171469633 | lincRNA                          | 2,00 | 0,2161218 |
| ENSG00000241622 | RARRES2P1       | 3  | 75658534  | 75659014  | processed_pseudogene             | 2,00 | 0,2161218 |
| ENSG00000281392 | LINC00506       | 3  | 87089129  | 87157069  | lincRNA                          | 2,00 | 7,06E-02  |
| ENSG00000234350 | ENSG00000234350 | 2  | 170723086 | 170770768 | lincRNA                          | 2,00 | 0,2161218 |
| ENSG00000235267 | ENSG00000235267 | 2  | 27455156  | 27455862  | processed_pseudogene             | 2,00 | 0,2161218 |
| ENSG00000235724 | ENSG00000235724 | 2  | 161222785 | 161308303 | antisense                        | 2,00 | 0,3318209 |
| ENSG00000153363 | LINC00467       | 1  | 211382803 | 211435333 | lincRNA                          | 2,00 | 2,21E-02  |
| ENSG00000227066 | ENSG00000227066 | 1  | 20154338  | 20160568  | lincRNA                          | 2,00 | 0,2161218 |
| ENSG00000227135 | GCSAML-AS1      | 1  | 247524679 | 247526752 | antisense                        | 2,00 | 0,2161218 |
| ENSG00000232678 | SPTLC1P4        | 1  | 152077952 | 152078211 | processed_pseudogene             | 2,00 | 7,06E-02  |
| ENSG00000235613 | NSRP1P1         | 1  | 77847110  | 77848802  | processed_pseudogene             | 2,00 | 0,0358681 |
| ENSG00000235795 | ENSG00000235795 | 1  | 100995473 | 100996260 | antisense                        | 2,00 | 0,2161218 |
| ENSG00000236947 | ENSG00000236947 | 1  | 156446412 | 156456577 | lincRNA                          | 2,00 | 0,2161218 |
| ENSG00000273059 | ENSG00000273059 | 1  | 148011799 | 148012228 | lincRNA                          | 2,00 | 0,2161218 |
| ENSG00000271826 | PLS3-AS1        | X  | 115518182 | 115562731 | antisense                        | 2,00 | 0,2161218 |
| ENSG00000274162 | SNX18P1Y        | X  | 11178306  | 11178816  | processed_pseudogene             | 2,00 | 0,2161218 |

**Supplementary Table S5: Lists of eQTL-linked lncRNA and mRNA pairs in CCs and MII oocytes**

| eQTL-linked lncRNAs and mRNA pairs in CCs |                 | eQTL-linked lncRNAs and mRNA pairs in MII oocytes |                 |
|-------------------------------------------|-----------------|---------------------------------------------------|-----------------|
| ENSG00000224460                           | ENSG00000001036 | ENSG00000237813                                   | ENSG00000001626 |
| ENSG00000229036                           | ENSG00000001036 | ENSG00000248360                                   | ENSG00000004468 |
| ENSG00000278206                           | ENSG00000001036 | ENSG00000236453                                   | ENSG00000004948 |
| ENSG00000230845                           | ENSG00000001084 | ENSG00000230333                                   | ENSG00000005108 |
| ENSG00000231683                           | ENSG00000001084 | ENSG00000229618                                   | ENSG00000006747 |
| ENSG00000249379                           | ENSG00000001084 | ENSG00000264067                                   | ENSG00000006788 |
| ENSG00000235016                           | ENSG00000001617 | ENSG00000273388                                   | ENSG00000006788 |
| ENSG00000188693                           | ENSG00000001630 | ENSG00000238098                                   | ENSG00000007038 |
| ENSG00000256789                           | ENSG00000002330 | ENSG00000179136                                   | ENSG00000007174 |
| ENSG00000257086                           | ENSG00000002330 | ENSG00000173811                                   | ENSG00000008324 |
| ENSG00000265784                           | ENSG00000002834 | ENSG00000238098                                   | ENSG00000010539 |
| ENSG00000266101                           | ENSG00000002834 | ENSG00000237400                                   | ENSG00000011426 |
| ENSG00000263412                           | ENSG00000002919 | ENSG00000282199                                   | ENSG00000012048 |
| ENSG00000263766                           | ENSG00000002919 | ENSG00000239219                                   | ENSG00000013293 |
| ENSG00000164845                           | ENSG00000003056 | ENSG00000231294                                   | ENSG00000021826 |
| ENSG00000215241                           | ENSG00000003056 | ENSG00000223586                                   | ENSG00000028839 |
| ENSG00000237248                           | ENSG00000003056 | ENSG00000227531                                   | ENSG00000030304 |
| ENSG00000256069                           | ENSG00000003056 | ENSG00000225548                                   | ENSG00000033867 |
| ENSG00000256552                           | ENSG00000003056 | ENSG00000229017                                   | ENSG00000034693 |
| ENSG00000256673                           | ENSG00000003056 | ENSG00000152931                                   | ENSG00000035499 |
| ENSG00000222019                           | ENSG00000003249 | ENSG00000254319                                   | ENSG00000036448 |
| ENSG00000223959                           | ENSG00000003249 | ENSG00000245248                                   | ENSG00000036672 |
| ENSG00000260259                           | ENSG00000003249 | ENSG00000254740                                   | ENSG00000036672 |
| ENSG00000226312                           | ENSG00000003400 | ENSG00000253968                                   | ENSG00000037241 |
| ENSG00000226312                           | ENSG00000003402 | ENSG00000260798                                   | ENSG00000039068 |
| ENSG00000224063                           | ENSG00000003436 | ENSG00000267112                                   | ENSG00000041353 |
| ENSG00000227227                           | ENSG00000003436 | ENSG00000233009                                   | ENSG00000043355 |
| ENSG00000235848                           | ENSG00000003509 | ENSG00000259712                                   | ENSG00000047346 |
| ENSG00000235016                           | ENSG00000003756 | ENSG00000236318                                   | ENSG00000048052 |
| ENSG00000249258                           | ENSG00000003989 | ENSG00000248994                                   | ENSG00000049656 |
| ENSG00000265254                           | ENSG00000004139 | ENSG00000224367                                   | ENSG00000049759 |
| ENSG00000265254                           | ENSG00000004142 | ENSG00000267593                                   | ENSG00000049759 |
| ENSG00000206417                           | ENSG00000004399 | ENSG00000231512                                   | ENSG00000054282 |
| ENSG00000228252                           | ENSG00000004399 | ENSG00000224260                                   | ENSG00000054392 |
| ENSG00000248916                           | ENSG00000004399 | ENSG00000259076                                   | ENSG00000054654 |
| ENSG00000225313                           | ENSG00000004455 | ENSG00000257191                                   | ENSG00000058272 |
| ENSG00000236065                           | ENSG00000004455 | ENSG00000257474                                   | ENSG00000058272 |
| ENSG00000239670                           | ENSG00000004455 | ENSG00000248901                                   | ENSG00000058729 |
| ENSG00000235049                           | ENSG00000004478 | ENSG00000250331                                   | ENSG00000058729 |
| ENSG00000246627                           | ENSG00000004478 | ENSG00000251513                                   | ENSG00000058729 |
| ENSG00000235016                           | ENSG00000004534 | ENSG00000238098                                   | ENSG00000059145 |
| ENSG00000267049                           | ENSG00000004776 | ENSG00000261713                                   | ENSG00000059145 |
| ENSG00000267698                           | ENSG00000004776 | ENSG00000179818                                   | ENSG00000059728 |
| ENSG00000267049                           | ENSG00000004777 | ENSG00000256209                                   | ENSG00000060709 |
| ENSG00000267874                           | ENSG00000004777 | ENSG00000260798                                   | ENSG00000062038 |

|                 |                 |
|-----------------|-----------------|
| ENSG00000231170 | ENSG00000004799 |
| ENSG00000235016 | ENSG00000004838 |
| ENSG00000231170 | ENSG00000004864 |
| ENSG00000231764 | ENSG00000004864 |
| ENSG00000214188 | ENSG00000004866 |
| ENSG00000226367 | ENSG00000004866 |
| ENSG00000243243 | ENSG00000004866 |
| ENSG00000267419 | ENSG00000005007 |
| ENSG00000269145 | ENSG00000005007 |
| ENSG00000273654 | ENSG00000005007 |
| ENSG00000257261 | ENSG00000005175 |
| ENSG00000257735 | ENSG00000005175 |
| ENSG00000260510 | ENSG00000005187 |
| ENSG00000189149 | ENSG00000005189 |
| ENSG00000260510 | ENSG00000005189 |
| ENSG00000230074 | ENSG00000005238 |
| ENSG00000262879 | ENSG00000005243 |
| ENSG00000264701 | ENSG00000005243 |
| ENSG00000266341 | ENSG00000005243 |
| ENSG00000243193 | ENSG00000005249 |
| ENSG00000265148 | ENSG00000005379 |
| ENSG00000237737 | ENSG00000005448 |
| ENSG00000257800 | ENSG00000005448 |
| ENSG00000182165 | ENSG00000005469 |
| ENSG00000228393 | ENSG00000005483 |
| ENSG00000205485 | ENSG00000005486 |
| ENSG00000205534 | ENSG00000005844 |
| ENSG00000260494 | ENSG00000005844 |
| ENSG00000260911 | ENSG00000005844 |
| ENSG00000261346 | ENSG00000005844 |
| ENSG00000261474 | ENSG00000005844 |
| ENSG00000234230 | ENSG00000005889 |
| ENSG00000233382 | ENSG00000005893 |
| ENSG00000258545 | ENSG00000005893 |
| ENSG00000268030 | ENSG00000006015 |
| ENSG00000268199 | ENSG00000006016 |
| ENSG00000234494 | ENSG00000006025 |
| ENSG00000263412 | ENSG00000006025 |
| ENSG00000214425 | ENSG00000006062 |
| ENSG00000267121 | ENSG00000006062 |
| ENSG00000277089 | ENSG00000006125 |
| ENSG00000205890 | ENSG00000006194 |
| ENSG00000260565 | ENSG00000006194 |
| ENSG00000262370 | ENSG00000006194 |
| ENSG00000260467 | ENSG00000006210 |
| ENSG00000250107 | ENSG00000006282 |
| ENSG00000251239 | ENSG00000006282 |
| ENSG00000229980 | ENSG00000006283 |

|                 |                  |
|-----------------|------------------|
| ENSG00000268686 | ENSG000000063127 |
| ENSG00000267606 | ENSG000000063245 |
| ENSG00000267710 | ENSG000000063245 |
| ENSG00000261286 | ENSG000000064270 |
| ENSG00000229855 | ENSG000000064692 |
| ENSG00000250328 | ENSG000000064692 |
| ENSG00000238098 | ENSG000000065057 |
| ENSG00000261713 | ENSG000000065057 |
| ENSG00000230131 | ENSG000000065154 |
| ENSG00000265975 | ENSG000000065320 |
| ENSG00000239523 | ENSG000000065534 |
| ENSG00000237943 | ENSG000000065675 |
| ENSG00000227165 | ENSG000000066468 |
| ENSG00000257165 | ENSG000000067715 |
| ENSG00000257191 | ENSG000000067715 |
| ENSG00000258084 | ENSG000000067715 |
| ENSG00000258220 | ENSG000000067715 |
| ENSG00000257165 | ENSG000000067798 |
| ENSG00000258084 | ENSG000000067798 |
| ENSG00000250167 | ENSG000000069018 |
| ENSG00000249364 | ENSG000000069020 |
| ENSG00000251391 | ENSG000000069020 |
| ENSG00000257004 | ENSG000000070018 |
| ENSG00000271119 | ENSG000000071539 |
| ENSG00000241956 | ENSG000000072571 |
| ENSG00000236333 | ENSG000000072657 |
| ENSG00000177112 | ENSG000000072952 |
| ENSG00000225764 | ENSG000000073282 |
| ENSG00000255308 | ENSG000000074319 |
| ENSG00000247213 | ENSG000000075035 |
| ENSG00000232455 | ENSG000000075914 |
| ENSG00000228791 | ENSG000000077092 |
| ENSG00000237838 | ENSG000000077092 |
| ENSG00000229291 | ENSG000000077585 |
| ENSG00000226140 | ENSG000000077943 |
| ENSG00000253634 | ENSG000000079102 |
| ENSG00000253901 | ENSG000000079102 |
| ENSG00000246662 | ENSG000000079112 |
| ENSG00000253773 | ENSG000000079112 |
| ENSG00000223786 | ENSG000000080007 |
| ENSG00000231332 | ENSG000000080007 |
| ENSG00000246316 | ENSG000000080709 |
| ENSG00000248245 | ENSG000000081059 |
| ENSG00000250994 | ENSG000000081059 |
| ENSG00000254024 | ENSG000000083307 |
| ENSG00000261848 | ENSG000000083454 |
| ENSG00000261848 | ENSG000000083457 |
| ENSG00000261898 | ENSG000000083457 |

|                 |                 |
|-----------------|-----------------|
| ENSG00000250107 | ENSG00000006283 |
| ENSG00000215154 | ENSG00000006327 |
| ENSG00000260565 | ENSG00000006327 |
| ENSG00000160172 | ENSG00000006534 |
| ENSG00000255306 | ENSG00000006534 |
| ENSG00000220804 | ENSG00000006607 |
| ENSG00000267551 | ENSG00000006638 |
| ENSG00000269486 | ENSG00000006712 |
| ENSG00000188185 | ENSG00000006715 |
| ENSG00000229851 | ENSG00000006756 |
| ENSG00000266903 | ENSG00000007047 |
| ENSG00000269815 | ENSG00000007080 |
| ENSG00000273654 | ENSG00000007080 |
| ENSG00000130612 | ENSG00000007129 |
| ENSG00000239736 | ENSG00000007129 |
| ENSG00000267107 | ENSG00000007129 |
| ENSG00000268027 | ENSG00000007129 |
| ENSG00000270164 | ENSG00000007129 |
| ENSG00000262791 | ENSG00000007168 |
| ENSG00000266527 | ENSG00000007171 |
| ENSG00000264031 | ENSG00000007202 |
| ENSG00000264808 | ENSG00000007202 |
| ENSG00000266527 | ENSG00000007202 |
| ENSG00000267259 | ENSG00000007202 |
| ENSG00000233635 | ENSG00000007314 |
| ENSG00000263644 | ENSG00000007314 |
| ENSG00000236829 | ENSG00000007376 |
| ENSG00000261691 | ENSG00000007376 |
| ENSG00000234769 | ENSG00000007384 |
| ENSG00000236829 | ENSG00000007384 |
| ENSG00000260316 | ENSG00000007384 |
| ENSG00000261659 | ENSG00000007384 |
| ENSG00000236829 | ENSG00000007392 |
| ENSG00000261659 | ENSG00000007392 |
| ENSG00000236829 | ENSG00000007516 |
| ENSG00000229106 | ENSG00000007968 |
| ENSG00000227775 | ENSG00000008130 |
| ENSG00000230092 | ENSG00000008130 |
| ENSG00000237491 | ENSG00000008130 |
| ENSG00000268575 | ENSG00000008130 |
| ENSG00000233635 | ENSG00000008283 |
| ENSG00000265702 | ENSG00000008283 |
| ENSG00000229980 | ENSG00000008294 |
| ENSG00000228350 | ENSG00000008300 |
| ENSG00000260565 | ENSG00000008516 |
| ENSG00000261971 | ENSG00000008516 |
| ENSG00000263072 | ENSG00000008516 |
| ENSG00000261971 | ENSG00000008517 |

|                 |                  |
|-----------------|------------------|
| ENSG00000262670 | ENSG000000083457 |
| ENSG00000262921 | ENSG000000083457 |
| ENSG00000228802 | ENSG000000085449 |
| ENSG00000250195 | ENSG000000085871 |
| ENSG00000261713 | ENSG000000086506 |
| ENSG00000229291 | ENSG000000086619 |
| ENSG00000204666 | ENSG000000086967 |
| ENSG00000258535 | ENSG000000087302 |
| ENSG00000231290 | ENSG000000087495 |
| ENSG00000235590 | ENSG000000087495 |
| ENSG00000237121 | ENSG000000087495 |
| ENSG00000254620 | ENSG000000087495 |
| ENSG00000253392 | ENSG000000088256 |
| ENSG00000277301 | ENSG000000088325 |
| ENSG00000232746 | ENSG000000088726 |
| ENSG00000251165 | ENSG000000088926 |
| ENSG00000257883 | ENSG000000088992 |
| ENSG00000257452 | ENSG000000089169 |
| ENSG00000261713 | ENSG000000090581 |
| ENSG00000261239 | ENSG000000091651 |
| ENSG00000257285 | ENSG000000092036 |
| ENSG00000257285 | ENSG000000092054 |
| ENSG00000234511 | ENSG000000094755 |
| ENSG00000253591 | ENSG000000094755 |
| ENSG00000234477 | ENSG000000094804 |
| ENSG00000225243 | ENSG000000094963 |
| ENSG00000230107 | ENSG00000100162  |
| ENSG00000188511 | ENSG00000100253  |
| ENSG00000233080 | ENSG00000100281  |
| ENSG00000279184 | ENSG00000100281  |
| ENSG00000279159 | ENSG00000100330  |
| ENSG00000257636 | ENSG00000100473  |
| ENSG00000258558 | ENSG00000100473  |
| ENSG00000259039 | ENSG00000100567  |
| ENSG00000258416 | ENSG00000100629  |
| ENSG00000259035 | ENSG00000100629  |
| ENSG00000258979 | ENSG00000100749  |
| ENSG00000258342 | ENSG00000100906  |
| ENSG00000234948 | ENSG00000101115  |
| ENSG00000132832 | ENSG00000101443  |
| ENSG00000264859 | ENSG00000101695  |
| ENSG00000227042 | ENSG00000101871  |
| ENSG00000235834 | ENSG00000102054  |
| ENSG00000233009 | ENSG00000102452  |
| ENSG00000276012 | ENSG00000102466  |
| ENSG00000276476 | ENSG00000102678  |
| ENSG00000261008 | ENSG00000102984  |
| ENSG00000260798 | ENSG00000103044  |



|                 |                 |
|-----------------|-----------------|
| ENSG00000260293 | ENSG00000008710 |
| ENSG00000262370 | ENSG00000008710 |
| ENSG00000184319 | ENSG00000008735 |
| ENSG00000245025 | ENSG00000008853 |
| ENSG00000253125 | ENSG00000008853 |
| ENSG00000254064 | ENSG00000008853 |
| ENSG00000232973 | ENSG00000008869 |
| ENSG00000235848 | ENSG00000008869 |
| ENSG00000236213 | ENSG00000008869 |
| ENSG00000233038 | ENSG00000009335 |
| ENSG00000231889 | ENSG00000009413 |
| ENSG00000271789 | ENSG00000009413 |
| ENSG00000272078 | ENSG00000009724 |
| ENSG00000224666 | ENSG00000010030 |
| ENSG00000246982 | ENSG00000010030 |
| ENSG00000224424 | ENSG00000010256 |
| ENSG00000215039 | ENSG00000010292 |
| ENSG00000219410 | ENSG00000010295 |
| ENSG00000214855 | ENSG00000010310 |
| ENSG00000266903 | ENSG00000010310 |
| ENSG00000267282 | ENSG00000010310 |
| ENSG00000242797 | ENSG00000010322 |
| ENSG00000180279 | ENSG00000010361 |
| ENSG00000269352 | ENSG00000010361 |
| ENSG00000235703 | ENSG00000010404 |
| ENSG00000238039 | ENSG00000010404 |
| ENSG00000241769 | ENSG00000010404 |
| ENSG00000205885 | ENSG00000010610 |
| ENSG00000215039 | ENSG00000010610 |
| ENSG00000168405 | ENSG00000010704 |
| ENSG00000228223 | ENSG00000010704 |
| ENSG00000235358 | ENSG00000010803 |
| ENSG00000260920 | ENSG00000010803 |
| ENSG00000281207 | ENSG00000010803 |
| ENSG00000225315 | ENSG00000011009 |
| ENSG00000264443 | ENSG00000011009 |
| ENSG00000242349 | ENSG00000011021 |
| ENSG00000233635 | ENSG00000011028 |
| ENSG00000263644 | ENSG00000011028 |
| ENSG00000265702 | ENSG00000011028 |
| ENSG00000236908 | ENSG00000011105 |
| ENSG00000246627 | ENSG00000011105 |
| ENSG00000258325 | ENSG00000011105 |
| ENSG00000265148 | ENSG00000011143 |
| ENSG00000265542 | ENSG00000011143 |
| ENSG00000236869 | ENSG00000011198 |
| ENSG00000273218 | ENSG00000011243 |
| ENSG00000229980 | ENSG00000011258 |

|                 |                 |
|-----------------|-----------------|
| ENSG00000260798 | ENSG00000103056 |
| ENSG00000260338 | ENSG00000103174 |
| ENSG00000274367 | ENSG00000103355 |
| ENSG00000259929 | ENSG00000103528 |
| ENSG00000256340 | ENSG00000103534 |
| ENSG00000260430 | ENSG00000103540 |
| ENSG00000260592 | ENSG00000103540 |
| ENSG00000259673 | ENSG00000103599 |
| ENSG00000259700 | ENSG00000103995 |
| ENSG00000253944 | ENSG00000104213 |
| ENSG00000235531 | ENSG00000104313 |
| ENSG00000254031 | ENSG00000104313 |
| ENSG00000254277 | ENSG00000104313 |
| ENSG00000235531 | ENSG00000104321 |
| ENSG00000253394 | ENSG00000104327 |
| ENSG00000253799 | ENSG00000104327 |
| ENSG00000254180 | ENSG00000104327 |
| ENSG00000249395 | ENSG00000104369 |
| ENSG00000253983 | ENSG00000104369 |
| ENSG00000254349 | ENSG00000104369 |
| ENSG00000249395 | ENSG00000104381 |
| ENSG00000254349 | ENSG00000104381 |
| ENSG00000253773 | ENSG00000104413 |
| ENSG00000253893 | ENSG00000104626 |
| ENSG00000254235 | ENSG00000104626 |
| ENSG00000254367 | ENSG00000104626 |
| ENSG00000253535 | ENSG00000104722 |
| ENSG00000248257 | ENSG00000105732 |
| ENSG00000223838 | ENSG00000105849 |
| ENSG00000243004 | ENSG00000105849 |
| ENSG00000243797 | ENSG00000105865 |
| ENSG00000234352 | ENSG00000105894 |
| ENSG00000223561 | ENSG00000105928 |
| ENSG00000254369 | ENSG00000105991 |
| ENSG00000254369 | ENSG00000105996 |
| ENSG00000223813 | ENSG00000106069 |
| ENSG00000233108 | ENSG00000106415 |
| ENSG00000230333 | ENSG00000106443 |
| ENSG00000272701 | ENSG00000106484 |
| ENSG00000181211 | ENSG00000106588 |
| ENSG00000231539 | ENSG00000106588 |
| ENSG00000231638 | ENSG00000106588 |
| ENSG00000232006 | ENSG00000106588 |
| ENSG00000227482 | ENSG00000106927 |
| ENSG00000229981 | ENSG00000108018 |
| ENSG00000203876 | ENSG00000108055 |
| ENSG00000231829 | ENSG00000108242 |
| ENSG00000234477 | ENSG00000108244 |

|                 |                 |
|-----------------|-----------------|
| ENSG00000229980 | ENSG00000011260 |
| ENSG00000175061 | ENSG00000011295 |
| ENSG00000227782 | ENSG00000011295 |
| ENSG00000266933 | ENSG00000011304 |
| ENSG00000186019 | ENSG00000011422 |
| ENSG00000257242 | ENSG00000011465 |
| ENSG00000266903 | ENSG00000011478 |
| ENSG00000205786 | ENSG00000011600 |
| ENSG00000267254 | ENSG00000011600 |
| ENSG00000267698 | ENSG00000011600 |
| ENSG00000180747 | ENSG00000011638 |
| ENSG00000275445 | ENSG00000011638 |
| ENSG00000267219 | ENSG00000012124 |
| ENSG00000267698 | ENSG00000012124 |
| ENSG00000235016 | ENSG00000012171 |
| ENSG00000204620 | ENSG00000012211 |
| ENSG00000224812 | ENSG00000012779 |
| ENSG00000231964 | ENSG00000012779 |
| ENSG00000237840 | ENSG00000012779 |
| ENSG00000248265 | ENSG00000012822 |
| ENSG00000258086 | ENSG00000012822 |
| ENSG00000214900 | ENSG00000012983 |
| ENSG00000259113 | ENSG00000012983 |
| ENSG00000242578 | ENSG00000013297 |
| ENSG00000269889 | ENSG00000013297 |
| ENSG00000267121 | ENSG00000013306 |
| ENSG00000240449 | ENSG00000013374 |
| ENSG00000258301 | ENSG00000013523 |
| ENSG00000258569 | ENSG00000013523 |
| ENSG00000259081 | ENSG00000013523 |
| ENSG00000232725 | ENSG00000013563 |
| ENSG00000280195 | ENSG00000013563 |
| ENSG00000183935 | ENSG00000013583 |
| ENSG00000247498 | ENSG00000013583 |
| ENSG00000255621 | ENSG00000013583 |
| ENSG00000235703 | ENSG00000013619 |
| ENSG00000243742 | ENSG00000013725 |
| ENSG00000256813 | ENSG00000013725 |
| ENSG00000245532 | ENSG00000014216 |
| ENSG00000254614 | ENSG00000014216 |
| ENSG00000255478 | ENSG00000014216 |
| ENSG00000257086 | ENSG00000014216 |
| ENSG00000248724 | ENSG00000014257 |
| ENSG00000223935 | ENSG00000014641 |
| ENSG00000220323 | ENSG00000014914 |
| ENSG00000277147 | ENSG00000014914 |
| ENSG00000232656 | ENSG00000015171 |
| ENSG00000237341 | ENSG00000015285 |

|                 |                 |
|-----------------|-----------------|
| ENSG00000267440 | ENSG00000108849 |
| ENSG00000282199 | ENSG00000108852 |
| ENSG00000227517 | ENSG00000108984 |
| ENSG00000267009 | ENSG00000108984 |
| ENSG00000248747 | ENSG00000109445 |
| ENSG00000248810 | ENSG00000109445 |
| ENSG00000250131 | ENSG00000109674 |
| ENSG00000251230 | ENSG00000109762 |
| ENSG00000250327 | ENSG00000109794 |
| ENSG00000255027 | ENSG00000109832 |
| ENSG00000254560 | ENSG00000109881 |
| ENSG00000255425 | ENSG00000110002 |
| ENSG00000214788 | ENSG00000110108 |
| ENSG00000255202 | ENSG00000110427 |
| ENSG00000258026 | ENSG00000111046 |
| ENSG00000258131 | ENSG00000111145 |
| ENSG00000185847 | ENSG00000111249 |
| ENSG00000203585 | ENSG00000111554 |
| ENSG00000241825 | ENSG00000111581 |
| ENSG00000258168 | ENSG00000111596 |
| ENSG00000223786 | ENSG00000111799 |
| ENSG00000272243 | ENSG00000111799 |
| ENSG00000271860 | ENSG00000112214 |
| ENSG00000272168 | ENSG00000112273 |
| ENSG00000227192 | ENSG00000112414 |
| ENSG00000229017 | ENSG00000112414 |
| ENSG00000250974 | ENSG00000112941 |
| ENSG00000248994 | ENSG00000113430 |
| ENSG00000248245 | ENSG00000113558 |
| ENSG00000250994 | ENSG00000113558 |
| ENSG00000206120 | ENSG00000114204 |
| ENSG00000238755 | ENSG00000114790 |
| ENSG00000241220 | ENSG00000114790 |
| ENSG00000243069 | ENSG00000114790 |
| ENSG00000225258 | ENSG00000115232 |
| ENSG00000281131 | ENSG00000115232 |
| ENSG00000224643 | ENSG00000115252 |
| ENSG00000237750 | ENSG00000115271 |
| ENSG00000232034 | ENSG00000115539 |
| ENSG00000233633 | ENSG00000115705 |
| ENSG00000145063 | ENSG00000115758 |
| ENSG00000205054 | ENSG00000116016 |
| ENSG00000232498 | ENSG00000116741 |
| ENSG00000233478 | ENSG00000117643 |
| ENSG00000264859 | ENSG00000118276 |
| ENSG00000237548 | ENSG00000119397 |
| ENSG00000235495 | ENSG00000119865 |
| ENSG00000230773 | ENSG00000119888 |

|                 |                 |
|-----------------|-----------------|
| ENSG00000237517 | ENSG00000015475 |
| ENSG00000254363 | ENSG00000015479 |
| ENSG00000228903 | ENSG00000015520 |
| ENSG00000229980 | ENSG00000015532 |
| ENSG00000228252 | ENSG00000017260 |
| ENSG00000281344 | ENSG00000017427 |
| ENSG00000241313 | ENSG00000018408 |
| ENSG00000213963 | ENSG00000018510 |
| ENSG00000253608 | ENSG00000019549 |
| ENSG00000254333 | ENSG00000019582 |
| ENSG00000233334 | ENSG00000019995 |
| ENSG00000249456 | ENSG00000019995 |
| ENSG00000253161 | ENSG00000020181 |
| ENSG00000228172 | ENSG00000020633 |
| ENSG00000230438 | ENSG00000021355 |
| ENSG00000250903 | ENSG00000021355 |
| ENSG00000078319 | ENSG00000021461 |
| ENSG00000242294 | ENSG00000021461 |
| ENSG00000272752 | ENSG00000021461 |
| ENSG00000238184 | ENSG00000021762 |
| ENSG00000258959 | ENSG00000022976 |
| ENSG00000232934 | ENSG00000023041 |
| ENSG00000251661 | ENSG00000023191 |
| ENSG00000255237 | ENSG00000023191 |
| ENSG00000269915 | ENSG00000023191 |
| ENSG00000231955 | ENSG00000023228 |
| ENSG00000279220 | ENSG00000023228 |
| ENSG00000228801 | ENSG00000023287 |
| ENSG00000227695 | ENSG00000023839 |
| ENSG00000246982 | ENSG00000023892 |
| ENSG00000277147 | ENSG00000023902 |
| ENSG00000268061 | ENSG00000024422 |
| ENSG00000184319 | ENSG00000025708 |
| ENSG00000278869 | ENSG00000025708 |
| ENSG00000273188 | ENSG00000025770 |
| ENSG00000234961 | ENSG00000026025 |
| ENSG00000203999 | ENSG00000026559 |
| ENSG00000224397 | ENSG00000026559 |
| ENSG00000198358 | ENSG00000026751 |
| ENSG00000224259 | ENSG00000026751 |
| ENSG00000124549 | ENSG00000026950 |
| ENSG00000232774 | ENSG00000027075 |
| ENSG00000234263 | ENSG00000027697 |
| ENSG00000246596 | ENSG00000027847 |
| ENSG00000247679 | ENSG00000027847 |
| ENSG00000236947 | ENSG00000027869 |
| ENSG00000245311 | ENSG00000029153 |
| ENSG00000255968 | ENSG00000029153 |

|                 |                 |
|-----------------|-----------------|
| ENSG00000278390 | ENSG00000120696 |
| ENSG00000257322 | ENSG00000120833 |
| ENSG00000249395 | ENSG00000121005 |
| ENSG00000248278 | ENSG00000121073 |
| ENSG00000248714 | ENSG00000121073 |
| ENSG00000264672 | ENSG00000121101 |
| ENSG00000248278 | ENSG00000121104 |
| ENSG00000280241 | ENSG00000121211 |
| ENSG00000167355 | ENSG00000121236 |
| ENSG00000249867 | ENSG00000121621 |
| ENSG00000254560 | ENSG00000121621 |
| ENSG00000255202 | ENSG00000121690 |
| ENSG00000230131 | ENSG00000121898 |
| ENSG00000223911 | ENSG00000121989 |
| ENSG00000235944 | ENSG00000122543 |
| ENSG00000237400 | ENSG00000122547 |
| ENSG00000223838 | ENSG00000122691 |
| ENSG00000226522 | ENSG00000122691 |
| ENSG00000243004 | ENSG00000122691 |
| ENSG00000248636 | ENSG00000122966 |
| ENSG00000257452 | ENSG00000123064 |
| ENSG00000132832 | ENSG00000124196 |
| ENSG00000267440 | ENSG00000125319 |
| ENSG00000229876 | ENSG00000125872 |
| ENSG00000232677 | ENSG00000126246 |
| ENSG00000269086 | ENSG00000126249 |
| ENSG00000234477 | ENSG00000126337 |
| ENSG00000238098 | ENSG00000127564 |
| ENSG00000260107 | ENSG00000127564 |
| ENSG00000262668 | ENSG00000127564 |
| ENSG00000227308 | ENSG00000127824 |
| ENSG00000267606 | ENSG00000127903 |
| ENSG00000234626 | ENSG00000128276 |
| ENSG00000234715 | ENSG00000128606 |
| ENSG00000224189 | ENSG00000128645 |
| ENSG00000213981 | ENSG00000128683 |
| ENSG00000259240 | ENSG00000128872 |
| ENSG00000259712 | ENSG00000128872 |
| ENSG00000245719 | ENSG00000129007 |
| ENSG00000259410 | ENSG00000129007 |
| ENSG00000259673 | ENSG00000129007 |
| ENSG00000261801 | ENSG00000129038 |
| ENSG00000249993 | ENSG00000129048 |
| ENSG00000255308 | ENSG00000129170 |
| ENSG00000255511 | ENSG00000129170 |
| ENSG00000255308 | ENSG00000129173 |
| ENSG00000262943 | ENSG00000129194 |
| ENSG00000253944 | ENSG00000129422 |

|                 |                 |
|-----------------|-----------------|
| ENSG00000231028 | ENSG00000029363 |
| ENSG00000237596 | ENSG00000029363 |
| ENSG00000261879 | ENSG00000029725 |
| ENSG00000204188 | ENSG00000030110 |
| ENSG00000240254 | ENSG00000031081 |
| ENSG00000242622 | ENSG00000031081 |
| ENSG00000241720 | ENSG00000031698 |
| ENSG00000268191 | ENSG00000031823 |
| ENSG00000268203 | ENSG00000031823 |
| ENSG00000268758 | ENSG00000031823 |
| ENSG00000268758 | ENSG00000032444 |
| ENSG00000262686 | ENSG00000033011 |
| ENSG00000268635 | ENSG00000033327 |
| ENSG00000267002 | ENSG00000033627 |
| ENSG00000233098 | ENSG00000034152 |
| ENSG00000228252 | ENSG00000034533 |
| ENSG00000228643 | ENSG00000035115 |
| ENSG00000271816 | ENSG00000035403 |
| ENSG00000271848 | ENSG00000035403 |
| ENSG00000272140 | ENSG00000035403 |
| ENSG00000273175 | ENSG00000035687 |
| ENSG00000266970 | ENSG00000035862 |
| ENSG00000080947 | ENSG00000037637 |
| ENSG00000215908 | ENSG00000037637 |
| ENSG00000237276 | ENSG00000037637 |
| ENSG00000248265 | ENSG00000037965 |
| ENSG00000250742 | ENSG00000037965 |
| ENSG00000258086 | ENSG00000037965 |
| ENSG00000261386 | ENSG00000038358 |
| ENSG00000249835 | ENSG00000038427 |
| ENSG00000250320 | ENSG00000038427 |
| ENSG00000263033 | ENSG00000038532 |
| ENSG00000251307 | ENSG00000039123 |
| ENSG00000247572 | ENSG00000039319 |
| ENSG00000161643 | ENSG00000039650 |
| ENSG00000268006 | ENSG00000039650 |
| ENSG00000268047 | ENSG00000039650 |
| ENSG00000269352 | ENSG00000039650 |
| ENSG00000214353 | ENSG00000040199 |
| ENSG00000260185 | ENSG00000040199 |
| ENSG00000261513 | ENSG00000040199 |
| ENSG00000262903 | ENSG00000040531 |
| ENSG00000215067 | ENSG00000040633 |
| ENSG00000256806 | ENSG00000040633 |
| ENSG00000228486 | ENSG00000040933 |
| ENSG00000250519 | ENSG00000042429 |
| ENSG00000255929 | ENSG00000042429 |
| ENSG00000224186 | ENSG00000043143 |

|                 |                 |
|-----------------|-----------------|
| ENSG00000267174 | ENSG00000130167 |
| ENSG00000267174 | ENSG00000130176 |
| ENSG00000230666 | ENSG00000130201 |
| ENSG00000231806 | ENSG00000130957 |
| ENSG00000261175 | ENSG00000131148 |
| ENSG00000178412 | ENSG00000131196 |
| ENSG00000267287 | ENSG00000131196 |
| ENSG00000248245 | ENSG00000131437 |
| ENSG00000246889 | ENSG00000131626 |
| ENSG00000234477 | ENSG00000131747 |
| ENSG00000251218 | ENSG00000131773 |
| ENSG00000262670 | ENSG00000132388 |
| ENSG00000273819 | ENSG00000132749 |
| ENSG00000225721 | ENSG00000132780 |
| ENSG00000176659 | ENSG00000132825 |
| ENSG00000267337 | ENSG00000132874 |
| ENSG00000274317 | ENSG00000133115 |
| ENSG00000251381 | ENSG00000133808 |
| ENSG00000254486 | ENSG00000133808 |
| ENSG00000257275 | ENSG00000133937 |
| ENSG00000267761 | ENSG00000134049 |
| ENSG00000186162 | ENSG00000134070 |
| ENSG00000254485 | ENSG00000134070 |
| ENSG00000230489 | ENSG00000134215 |
| ENSG00000254456 | ENSG00000134343 |
| ENSG00000234248 | ENSG00000134460 |
| ENSG00000237943 | ENSG00000134460 |
| ENSG00000255660 | ENSG00000134533 |
| ENSG00000226476 | ENSG00000134709 |
| ENSG00000264859 | ENSG00000134758 |
| ENSG00000224356 | ENSG00000134864 |
| ENSG00000233009 | ENSG00000134864 |
| ENSG00000280169 | ENSG00000134864 |
| ENSG00000247400 | ENSG00000134874 |
| ENSG00000226337 | ENSG00000135063 |
| ENSG00000257452 | ENSG00000135094 |
| ENSG00000241388 | ENSG00000135100 |
| ENSG00000255946 | ENSG00000135100 |
| ENSG00000241388 | ENSG00000135127 |
| ENSG00000248636 | ENSG00000135127 |
| ENSG00000257452 | ENSG00000135148 |
| ENSG00000259867 | ENSG00000135697 |
| ENSG00000261218 | ENSG00000135697 |
| ENSG00000236719 | ENSG00000135823 |
| ENSG00000228918 | ENSG00000135838 |
| ENSG00000231851 | ENSG00000135972 |
| ENSG00000214198 | ENSG00000136011 |
| ENSG00000258343 | ENSG00000136014 |

|                 |                 |
|-----------------|-----------------|
| ENSG00000273345 | ENSG00000043143 |
| ENSG00000237686 | ENSG00000044090 |
| ENSG00000232656 | ENSG00000047056 |
| ENSG00000232633 | ENSG00000047188 |
| ENSG00000281371 | ENSG00000047230 |
| ENSG00000245067 | ENSG00000047315 |
| ENSG00000261329 | ENSG00000047578 |
| ENSG00000259977 | ENSG00000047597 |
| ENSG00000255474 | ENSG00000047621 |
| ENSG00000227398 | ENSG00000047849 |
| ENSG00000256091 | ENSG00000048028 |
| ENSG00000256947 | ENSG00000048028 |
| ENSG00000248596 | ENSG00000048140 |
| ENSG00000236105 | ENSG00000048405 |
| ENSG00000254459 | ENSG00000048649 |
| ENSG00000254829 | ENSG00000048649 |
| ENSG00000224043 | ENSG00000048991 |
| ENSG00000182109 | ENSG00000049089 |
| ENSG00000235358 | ENSG00000049089 |
| ENSG00000243970 | ENSG00000049089 |
| ENSG00000250286 | ENSG00000049283 |
| ENSG00000251239 | ENSG00000049283 |
| ENSG00000275897 | ENSG00000049283 |
| ENSG00000255252 | ENSG00000049449 |
| ENSG00000165178 | ENSG00000049541 |
| ENSG00000214544 | ENSG00000049541 |
| ENSG00000277072 | ENSG00000049541 |
| ENSG00000226971 | ENSG00000049768 |
| ENSG00000228960 | ENSG00000050327 |
| ENSG00000229153 | ENSG00000050327 |
| ENSG00000244479 | ENSG00000050327 |
| ENSG00000253882 | ENSG00000050327 |
| ENSG00000236986 | ENSG00000050555 |
| ENSG00000229956 | ENSG00000050628 |
| ENSG00000233020 | ENSG00000050628 |
| ENSG00000235079 | ENSG00000050628 |
| ENSG00000248367 | ENSG00000050748 |
| ENSG00000214331 | ENSG00000050820 |
| ENSG00000240338 | ENSG00000050820 |
| ENSG00000267940 | ENSG00000051009 |
| ENSG00000266904 | ENSG00000051128 |
| ENSG00000269019 | ENSG00000051128 |
| ENSG00000248932 | ENSG00000051382 |
| ENSG00000260630 | ENSG00000051523 |
| ENSG00000235423 | ENSG00000051825 |
| ENSG00000231970 | ENSG00000052749 |
| ENSG00000246250 | ENSG00000052841 |
| ENSG00000254409 | ENSG00000052841 |

|                 |                 |
|-----------------|-----------------|
| ENSG00000258136 | ENSG00000136045 |
| ENSG00000261206 | ENSG00000136153 |
| ENSG00000184608 | ENSG00000136573 |
| ENSG00000225564 | ENSG00000136824 |
| ENSG00000159712 | ENSG00000136842 |
| ENSG00000237548 | ENSG00000136940 |
| ENSG00000159712 | ENSG00000136943 |
| ENSG00000281641 | ENSG00000136960 |
| ENSG00000237937 | ENSG00000137656 |
| ENSG00000256717 | ENSG00000137656 |
| ENSG00000259200 | ENSG00000137767 |
| ENSG00000245750 | ENSG00000137807 |
| ENSG00000259473 | ENSG00000137821 |
| ENSG00000259240 | ENSG00000137875 |
| ENSG00000259712 | ENSG00000137875 |
| ENSG00000205054 | ENSG00000138079 |
| ENSG00000248019 | ENSG00000138640 |
| ENSG00000251577 | ENSG00000138778 |
| ENSG00000232021 | ENSG00000138795 |
| ENSG00000232021 | ENSG00000138801 |
| ENSG00000255794 | ENSG00000139350 |
| ENSG00000258131 | ENSG00000139350 |
| ENSG00000257325 | ENSG00000139351 |
| ENSG00000257325 | ENSG00000139354 |
| ENSG00000248636 | ENSG00000139767 |
| ENSG00000225083 | ENSG00000139835 |
| ENSG00000258751 | ENSG00000139915 |
| ENSG00000259240 | ENSG00000140284 |
| ENSG00000187812 | ENSG00000140367 |
| ENSG00000260357 | ENSG00000140367 |
| ENSG00000187812 | ENSG00000140374 |
| ENSG00000259370 | ENSG00000140416 |
| ENSG00000259459 | ENSG00000140416 |
| ENSG00000259672 | ENSG00000140416 |
| ENSG00000260123 | ENSG00000140534 |
| ENSG00000259560 | ENSG00000140538 |
| ENSG00000260123 | ENSG00000140538 |
| ENSG00000260123 | ENSG00000140543 |
| ENSG00000257060 | ENSG00000140563 |
| ENSG00000258631 | ENSG00000140563 |
| ENSG00000258754 | ENSG00000140563 |
| ENSG00000258785 | ENSG00000140563 |
| ENSG00000245768 | ENSG00000140859 |
| ENSG00000259995 | ENSG00000140873 |
| ENSG00000261707 | ENSG00000140876 |
| ENSG00000250685 | ENSG00000140955 |
| ENSG00000261177 | ENSG00000140968 |
| ENSG00000268505 | ENSG00000140968 |

|                 |                 |
|-----------------|-----------------|
| ENSG00000254907 | ENSG00000052841 |
| ENSG00000258920 | ENSG00000053254 |
| ENSG00000224635 | ENSG00000053438 |
| ENSG00000269145 | ENSG00000053501 |
| ENSG00000269439 | ENSG00000053501 |
| ENSG00000269481 | ENSG00000053501 |
| ENSG00000256271 | ENSG00000053702 |
| ENSG00000258092 | ENSG00000053702 |
| ENSG00000258325 | ENSG00000053702 |
| ENSG00000264745 | ENSG00000053747 |
| ENSG00000259969 | ENSG00000053770 |
| ENSG00000099869 | ENSG00000053918 |
| ENSG00000233930 | ENSG00000053918 |
| ENSG00000269821 | ENSG00000053918 |
| ENSG00000197182 | ENSG00000054611 |
| ENSG00000235091 | ENSG00000054611 |
| ENSG00000260708 | ENSG00000054611 |
| ENSG00000279954 | ENSG00000054611 |
| ENSG00000260401 | ENSG00000054967 |
| ENSG00000258407 | ENSG00000054983 |
| ENSG00000258867 | ENSG00000054983 |
| ENSG00000259096 | ENSG00000054983 |
| ENSG00000268869 | ENSG00000055070 |
| ENSG00000268592 | ENSG00000055208 |
| ENSG00000281021 | ENSG00000055211 |
| ENSG00000232973 | ENSG00000055332 |
| ENSG00000235848 | ENSG00000055332 |
| ENSG00000272180 | ENSG00000055813 |
| ENSG00000239462 | ENSG00000057019 |
| ENSG00000236539 | ENSG00000057252 |
| ENSG00000223969 | ENSG00000058091 |
| ENSG00000226526 | ENSG00000058453 |
| ENSG00000189149 | ENSG00000058600 |
| ENSG00000237296 | ENSG00000058600 |
| ENSG00000232993 | ENSG00000058799 |
| ENSG00000259953 | ENSG00000059769 |
| ENSG00000176654 | ENSG00000059804 |
| ENSG00000256661 | ENSG00000059804 |
| ENSG00000282772 | ENSG00000059915 |
| ENSG00000256888 | ENSG00000060138 |
| ENSG00000229873 | ENSG00000060491 |
| ENSG00000277496 | ENSG00000060491 |
| ENSG00000261342 | ENSG00000060558 |
| ENSG00000267436 | ENSG00000060558 |
| ENSG00000267551 | ENSG00000060558 |
| ENSG00000183242 | ENSG00000060749 |
| ENSG00000255921 | ENSG00000060982 |
| ENSG00000278743 | ENSG00000060982 |

|                 |                 |
|-----------------|-----------------|
| ENSG00000268754 | ENSG00000140968 |
| ENSG00000179136 | ENSG00000141052 |
| ENSG00000265489 | ENSG00000141052 |
| ENSG00000261848 | ENSG00000141255 |
| ENSG00000260372 | ENSG00000141384 |
| ENSG00000267193 | ENSG00000141469 |
| ENSG00000264272 | ENSG00000141540 |
| ENSG00000266357 | ENSG00000141540 |
| ENSG00000260569 | ENSG00000141665 |
| ENSG00000263655 | ENSG00000141665 |
| ENSG00000263818 | ENSG00000141738 |
| ENSG00000225721 | ENSG00000142945 |
| ENSG00000233271 | ENSG00000143001 |
| ENSG00000234810 | ENSG00000143001 |
| ENSG00000228918 | ENSG00000143333 |
| ENSG00000228063 | ENSG00000143353 |
| ENSG00000236230 | ENSG00000143498 |
| ENSG00000238042 | ENSG00000143498 |
| ENSG00000236230 | ENSG00000143507 |
| ENSG00000238042 | ENSG00000143507 |
| ENSG00000272851 | ENSG00000144401 |
| ENSG00000273118 | ENSG00000144451 |
| ENSG00000237571 | ENSG00000144452 |
| ENSG00000186162 | ENSG00000144550 |
| ENSG00000254485 | ENSG00000144550 |
| ENSG00000254485 | ENSG00000144554 |
| ENSG00000249993 | ENSG00000144868 |
| ENSG00000239265 | ENSG00000144893 |
| ENSG00000243273 | ENSG00000144893 |
| ENSG00000239265 | ENSG00000144895 |
| ENSG00000243273 | ENSG00000144895 |
| ENSG00000249815 | ENSG00000145365 |
| ENSG00000249464 | ENSG00000145375 |
| ENSG00000249396 | ENSG00000145491 |
| ENSG00000250155 | ENSG00000145604 |
| ENSG00000248901 | ENSG00000145721 |
| ENSG00000250551 | ENSG00000145721 |
| ENSG00000251513 | ENSG00000145721 |
| ENSG00000231185 | ENSG00000145819 |
| ENSG00000250167 | ENSG00000145832 |
| ENSG00000251405 | ENSG00000145850 |
| ENSG00000231533 | ENSG00000146243 |
| ENSG00000271860 | ENSG00000146263 |
| ENSG00000271860 | ENSG00000146267 |
| ENSG00000232053 | ENSG00000146857 |
| ENSG00000253972 | ENSG00000147676 |
| ENSG00000281641 | ENSG00000147676 |
| ENSG00000253288 | ENSG00000147724 |

|                 |                 |
|-----------------|-----------------|
| ENSG00000257261 | ENSG00000061273 |
| ENSG00000257735 | ENSG00000061273 |
| ENSG00000274737 | ENSG00000061273 |
| ENSG00000249996 | ENSG00000061455 |
| ENSG00000088340 | ENSG00000061656 |
| ENSG00000232907 | ENSG00000061656 |
| ENSG00000241170 | ENSG00000062282 |
| ENSG00000214783 | ENSG00000062582 |
| ENSG00000228903 | ENSG00000062582 |
| ENSG00000273432 | ENSG00000062582 |
| ENSG00000259349 | ENSG00000062716 |
| ENSG00000266002 | ENSG00000062716 |
| ENSG00000267248 | ENSG00000062716 |
| ENSG00000280852 | ENSG00000062716 |
| ENSG00000259349 | ENSG00000062725 |
| ENSG00000268006 | ENSG00000062822 |
| ENSG00000257337 | ENSG00000063046 |
| ENSG00000257475 | ENSG00000063046 |
| ENSG00000232871 | ENSG00000063176 |
| ENSG00000268093 | ENSG00000063176 |
| ENSG00000232871 | ENSG00000063180 |
| ENSG00000235191 | ENSG00000063180 |
| ENSG00000267265 | ENSG00000063241 |
| ENSG00000267577 | ENSG00000063241 |
| ENSG00000266907 | ENSG00000063244 |
| ENSG00000267549 | ENSG00000063244 |
| ENSG00000218416 | ENSG00000063660 |
| ENSG00000227479 | ENSG00000063660 |
| ENSG00000251229 | ENSG00000063978 |
| ENSG00000247903 | ENSG00000064115 |
| ENSG00000245498 | ENSG00000064199 |
| ENSG00000250073 | ENSG00000064199 |
| ENSG00000238184 | ENSG00000064201 |
| ENSG00000269821 | ENSG00000064201 |
| ENSG00000244558 | ENSG00000064205 |
| ENSG00000239462 | ENSG00000064225 |
| ENSG00000267419 | ENSG00000064490 |
| ENSG00000268030 | ENSG00000064490 |
| ENSG00000266904 | ENSG00000064545 |
| ENSG00000269191 | ENSG00000064545 |
| ENSG00000267419 | ENSG00000064547 |
| ENSG00000275540 | ENSG00000064547 |
| ENSG00000269549 | ENSG00000064601 |
| ENSG00000271984 | ENSG00000064601 |
| ENSG00000267419 | ENSG00000064607 |
| ENSG00000275540 | ENSG00000064607 |
| ENSG00000230561 | ENSG00000064651 |
| ENSG00000245937 | ENSG00000064651 |

|                 |                 |
|-----------------|-----------------|
| ENSG00000236924 | ENSG00000147854 |
| ENSG00000227463 | ENSG00000148053 |
| ENSG00000236643 | ENSG00000148200 |
| ENSG00000225778 | ENSG00000148426 |
| ENSG00000203876 | ENSG00000148700 |
| ENSG00000255411 | ENSG00000148925 |
| ENSG00000254560 | ENSG00000148942 |
| ENSG00000255171 | ENSG00000148948 |
| ENSG00000255388 | ENSG00000148948 |
| ENSG00000251364 | ENSG00000149050 |
| ENSG00000254951 | ENSG00000149050 |
| ENSG00000254951 | ENSG00000149054 |
| ENSG00000254561 | ENSG00000149403 |
| ENSG00000175728 | ENSG00000149418 |
| ENSG00000255027 | ENSG00000149548 |
| ENSG00000255027 | ENSG00000149554 |
| ENSG00000132832 | ENSG00000149596 |
| ENSG00000229005 | ENSG00000149596 |
| ENSG00000233067 | ENSG00000149970 |
| ENSG00000248551 | ENSG00000150625 |
| ENSG00000249945 | ENSG00000150625 |
| ENSG00000263655 | ENSG00000150656 |
| ENSG00000228791 | ENSG00000151090 |
| ENSG00000237838 | ENSG00000151090 |
| ENSG00000232682 | ENSG00000151150 |
| ENSG00000258474 | ENSG00000151320 |
| ENSG00000258342 | ENSG00000151332 |
| ENSG00000248491 | ENSG00000151475 |
| ENSG00000248356 | ENSG00000151611 |
| ENSG00000234828 | ENSG00000151623 |
| ENSG00000248210 | ENSG00000151623 |
| ENSG00000249752 | ENSG00000151623 |
| ENSG00000250354 | ENSG00000151623 |
| ENSG00000234248 | ENSG00000151655 |
| ENSG00000236008 | ENSG00000151693 |
| ENSG00000254233 | ENSG00000151725 |
| ENSG00000132967 | ENSG00000151789 |
| ENSG00000225542 | ENSG00000151789 |
| ENSG00000250910 | ENSG00000151962 |
| ENSG00000267586 | ENSG00000152214 |
| ENSG00000249825 | ENSG00000152380 |
| ENSG00000249825 | ENSG00000152409 |
| ENSG00000246316 | ENSG00000152503 |
| ENSG00000239265 | ENSG00000152580 |
| ENSG00000243273 | ENSG00000152580 |
| ENSG00000203386 | ENSG00000152689 |
| ENSG00000259995 | ENSG00000152910 |
| ENSG00000247708 | ENSG00000152953 |

|                 |                 |
|-----------------|-----------------|
| ENSG00000267317 | ENSG00000064666 |
| ENSG00000266933 | ENSG00000064687 |
| ENSG00000224699 | ENSG00000064886 |
| ENSG00000231346 | ENSG00000064886 |
| ENSG00000235407 | ENSG00000064886 |
| ENSG00000240194 | ENSG00000064886 |
| ENSG00000266933 | ENSG00000064932 |
| ENSG00000267551 | ENSG00000064961 |
| ENSG00000224063 | ENSG00000064989 |
| ENSG00000227227 | ENSG00000064989 |
| ENSG00000225339 | ENSG00000064995 |
| ENSG00000196114 | ENSG00000064999 |
| ENSG00000225339 | ENSG00000064999 |
| ENSG00000267122 | ENSG00000065000 |
| ENSG00000267551 | ENSG00000065000 |
| ENSG00000241720 | ENSG00000065135 |
| ENSG00000254942 | ENSG00000065135 |
| ENSG00000236137 | ENSG00000065183 |
| ENSG00000225492 | ENSG00000065243 |
| ENSG00000231999 | ENSG00000065243 |
| ENSG00000237505 | ENSG00000065243 |
| ENSG00000225791 | ENSG00000065308 |
| ENSG00000257303 | ENSG00000065357 |
| ENSG00000258056 | ENSG00000065357 |
| ENSG00000272758 | ENSG00000065485 |
| ENSG00000240882 | ENSG00000065518 |
| ENSG00000242622 | ENSG00000065518 |
| ENSG00000186715 | ENSG00000065526 |
| ENSG00000237276 | ENSG00000065526 |
| ENSG00000268869 | ENSG00000065526 |
| ENSG00000225057 | ENSG00000065802 |
| ENSG00000188185 | ENSG00000065883 |
| ENSG00000217702 | ENSG00000065911 |
| ENSG00000257800 | ENSG00000065911 |
| ENSG00000176654 | ENSG00000065970 |
| ENSG00000256661 | ENSG00000065970 |
| ENSG00000257588 | ENSG00000066117 |
| ENSG00000272368 | ENSG00000066117 |
| ENSG00000198358 | ENSG00000066294 |
| ENSG00000228192 | ENSG00000066322 |
| ENSG00000230615 | ENSG00000066322 |
| ENSG00000255197 | ENSG00000066336 |
| ENSG00000237461 | ENSG00000066697 |
| ENSG00000227051 | ENSG00000066739 |
| ENSG00000267040 | ENSG00000066926 |
| ENSG00000237399 | ENSG00000067057 |
| ENSG00000225963 | ENSG00000067066 |
| ENSG00000233117 | ENSG00000067082 |

|                 |                 |
|-----------------|-----------------|
| ENSG00000251309 | ENSG00000153064 |
| ENSG00000258168 | ENSG00000153233 |
| ENSG00000204380 | ENSG00000153237 |
| ENSG00000244342 | ENSG00000153266 |
| ENSG00000265750 | ENSG00000154040 |
| ENSG00000266573 | ENSG00000154040 |
| ENSG00000261175 | ENSG00000154102 |
| ENSG00000261175 | ENSG00000154118 |
| ENSG00000184608 | ENSG00000154319 |
| ENSG00000237481 | ENSG00000154429 |
| ENSG00000213981 | ENSG00000154479 |
| ENSG00000260372 | ENSG00000154611 |
| ENSG00000273388 | ENSG00000154914 |
| ENSG00000232021 | ENSG00000155011 |
| ENSG00000235944 | ENSG00000155026 |
| ENSG00000249484 | ENSG00000155511 |
| ENSG00000237400 | ENSG00000155849 |
| ENSG00000251405 | ENSG00000155858 |
| ENSG00000256199 | ENSG00000156076 |
| ENSG00000259343 | ENSG00000156206 |
| ENSG00000259692 | ENSG00000156206 |
| ENSG00000215533 | ENSG00000156265 |
| ENSG00000236532 | ENSG00000156265 |
| ENSG00000249307 | ENSG00000156269 |
| ENSG00000215533 | ENSG00000156273 |
| ENSG00000225768 | ENSG00000156395 |
| ENSG00000253773 | ENSG00000156469 |
| ENSG00000253872 | ENSG00000156469 |
| ENSG00000254303 | ENSG00000156787 |
| ENSG00000214803 | ENSG00000156831 |
| ENSG00000249816 | ENSG00000156831 |
| ENSG00000253111 | ENSG00000156831 |
| ENSG00000253868 | ENSG00000156831 |
| ENSG00000224445 | ENSG00000156876 |
| ENSG00000259447 | ENSG00000156970 |
| ENSG00000254485 | ENSG00000156983 |
| ENSG00000251613 | ENSG00000157111 |
| ENSG00000259293 | ENSG00000157456 |
| ENSG00000259293 | ENSG00000157470 |
| ENSG00000205622 | ENSG00000157554 |
| ENSG00000227482 | ENSG00000157657 |
| ENSG00000234352 | ENSG00000157680 |
| ENSG00000196204 | ENSG00000157927 |
| ENSG00000251364 | ENSG00000158077 |
| ENSG00000265656 | ENSG00000158201 |
| ENSG00000232034 | ENSG00000158435 |
| ENSG00000260177 | ENSG00000158545 |
| ENSG00000215162 | ENSG00000158813 |



|                 |                 |
|-----------------|-----------------|
| ENSG00000237399 | ENSG00000067082 |
| ENSG00000251307 | ENSG00000067113 |
| ENSG00000265460 | ENSG00000067191 |
| ENSG00000223745 | ENSG00000067208 |
| ENSG00000224093 | ENSG00000067208 |
| ENSG00000260037 | ENSG00000067225 |
| ENSG00000260339 | ENSG00000067225 |
| ENSG00000261423 | ENSG00000067225 |
| ENSG00000261460 | ENSG00000067225 |
| ENSG00000205771 | ENSG00000067369 |
| ENSG00000259595 | ENSG00000067369 |
| ENSG00000188825 | ENSG00000067596 |
| ENSG00000213373 | ENSG00000067596 |
| ENSG00000267002 | ENSG00000067596 |
| ENSG00000217801 | ENSG00000067606 |
| ENSG00000227775 | ENSG00000067606 |
| ENSG00000268575 | ENSG00000067606 |
| ENSG00000232725 | ENSG00000067829 |
| ENSG00000267072 | ENSG00000067836 |
| ENSG00000184844 | ENSG00000067840 |
| ENSG00000232725 | ENSG00000067840 |
| ENSG00000260822 | ENSG00000067992 |
| ENSG00000230454 | ENSG00000068028 |
| ENSG00000235016 | ENSG00000068028 |
| ENSG00000188825 | ENSG00000068079 |
| ENSG00000267002 | ENSG00000068079 |
| ENSG00000267095 | ENSG00000068097 |
| ENSG00000267248 | ENSG00000068097 |
| ENSG00000188825 | ENSG00000068120 |
| ENSG00000213373 | ENSG00000068120 |
| ENSG00000188825 | ENSG00000068137 |
| ENSG00000267002 | ENSG00000068137 |
| ENSG00000182397 | ENSG00000068305 |
| ENSG00000259475 | ENSG00000068305 |
| ENSG00000226971 | ENSG00000068323 |
| ENSG00000226971 | ENSG00000068354 |
| ENSG00000267064 | ENSG00000068354 |
| ENSG00000214279 | ENSG00000068383 |
| ENSG00000229081 | ENSG00000068383 |
| ENSG00000234311 | ENSG00000068383 |
| ENSG00000226971 | ENSG00000068400 |
| ENSG00000232828 | ENSG00000068400 |
| ENSG00000226971 | ENSG00000068438 |
| ENSG00000274922 | ENSG00000068650 |
| ENSG00000232800 | ENSG00000068697 |
| ENSG00000236204 | ENSG00000068697 |
| ENSG00000228925 | ENSG00000068724 |
| ENSG00000239332 | ENSG00000068724 |

|                 |                 |
|-----------------|-----------------|
| ENSG00000234509 | ENSG00000159055 |
| ENSG00000282221 | ENSG00000159166 |
| ENSG00000282221 | ENSG00000159173 |
| ENSG00000239523 | ENSG00000160145 |
| ENSG00000225431 | ENSG00000160191 |
| ENSG00000253741 | ENSG00000160886 |
| ENSG00000234715 | ENSG00000161040 |
| ENSG00000263818 | ENSG00000161381 |
| ENSG00000268686 | ENSG00000161609 |
| ENSG00000262668 | ENSG00000162076 |
| ENSG00000234810 | ENSG00000162396 |
| ENSG00000230489 | ENSG00000162639 |
| ENSG00000261060 | ENSG00000162782 |
| ENSG00000145063 | ENSG00000162976 |
| ENSG00000224184 | ENSG00000162976 |
| ENSG00000224643 | ENSG00000162999 |
| ENSG00000224643 | ENSG00000163002 |
| ENSG00000224361 | ENSG00000163026 |
| ENSG00000235497 | ENSG00000163026 |
| ENSG00000235335 | ENSG00000163092 |
| ENSG00000247708 | ENSG00000163132 |
| ENSG00000231731 | ENSG00000163166 |
| ENSG00000225548 | ENSG00000163508 |
| ENSG00000241359 | ENSG00000163618 |
| ENSG00000244342 | ENSG00000163618 |
| ENSG00000248749 | ENSG00000163624 |
| ENSG00000250546 | ENSG00000163624 |
| ENSG00000241359 | ENSG00000163632 |
| ENSG00000244342 | ENSG00000163632 |
| ENSG00000241359 | ENSG00000163634 |
| ENSG00000244342 | ENSG00000163634 |
| ENSG00000241358 | ENSG00000163746 |
| ENSG00000240521 | ENSG00000163754 |
| ENSG00000248491 | ENSG00000164070 |
| ENSG00000232021 | ENSG00000164089 |
| ENSG00000249041 | ENSG00000164114 |
| ENSG00000250910 | ENSG00000164114 |
| ENSG00000250910 | ENSG00000164116 |
| ENSG00000251687 | ENSG00000164162 |
| ENSG00000249396 | ENSG00000164236 |
| ENSG00000249738 | ENSG00000164330 |
| ENSG00000248245 | ENSG00000164404 |
| ENSG00000223786 | ENSG00000164430 |
| ENSG00000197085 | ENSG00000164532 |
| ENSG00000243797 | ENSG00000164597 |
| ENSG00000250167 | ENSG00000164615 |
| ENSG00000250994 | ENSG00000164615 |
| ENSG00000232053 | ENSG00000164707 |

|                 |                 |
|-----------------|-----------------|
| ENSG00000235236 | ENSG00000068745 |
| ENSG00000245532 | ENSG00000068831 |
| ENSG00000256116 | ENSG00000068831 |
| ENSG00000269038 | ENSG00000068831 |
| ENSG00000229719 | ENSG00000068971 |
| ENSG00000255478 | ENSG00000068971 |
| ENSG00000266903 | ENSG00000069399 |
| ENSG00000267348 | ENSG00000069399 |
| ENSG00000111788 | ENSG00000069493 |
| ENSG00000214776 | ENSG00000069493 |
| ENSG00000245648 | ENSG00000069493 |
| ENSG00000256069 | ENSG00000069493 |
| ENSG00000236276 | ENSG00000069535 |
| ENSG00000183458 | ENSG00000069764 |
| ENSG00000260735 | ENSG00000069764 |
| ENSG00000249417 | ENSG00000069849 |
| ENSG00000259709 | ENSG00000069966 |
| ENSG00000100181 | ENSG00000069998 |
| ENSG00000280007 | ENSG00000069998 |
| ENSG00000236540 | ENSG00000070010 |
| ENSG00000237517 | ENSG00000070010 |
| ENSG00000255158 | ENSG00000070047 |
| ENSG00000255328 | ENSG00000070047 |
| ENSG00000240137 | ENSG00000070087 |
| ENSG00000240541 | ENSG00000070087 |
| ENSG00000248092 | ENSG00000070193 |
| ENSG00000258428 | ENSG00000070269 |
| ENSG00000259868 | ENSG00000070269 |
| ENSG00000266933 | ENSG00000070404 |
| ENSG00000237517 | ENSG00000070413 |
| ENSG00000262791 | ENSG00000070444 |
| ENSG00000263345 | ENSG00000070444 |
| ENSG00000265100 | ENSG00000070540 |
| ENSG00000267023 | ENSG00000070540 |
| ENSG00000227388 | ENSG00000070610 |
| ENSG00000230551 | ENSG00000070614 |
| ENSG00000231764 | ENSG00000070669 |
| ENSG00000258867 | ENSG00000070778 |
| ENSG00000230615 | ENSG00000070785 |
| ENSG00000268949 | ENSG00000070785 |
| ENSG00000226925 | ENSG00000071054 |
| ENSG00000249767 | ENSG00000071127 |
| ENSG00000272980 | ENSG00000071242 |
| ENSG00000258301 | ENSG00000071246 |
| ENSG00000258569 | ENSG00000071246 |
| ENSG00000206573 | ENSG00000071282 |
| ENSG00000232725 | ENSG00000071553 |
| ENSG00000280195 | ENSG00000071553 |

|                 |                 |
|-----------------|-----------------|
| ENSG00000249917 | ENSG00000164756 |
| ENSG00000225329 | ENSG00000164815 |
| ENSG00000246263 | ENSG00000164929 |
| ENSG00000253773 | ENSG00000164941 |
| ENSG00000232000 | ENSG00000164989 |
| ENSG00000231107 | ENSG00000165023 |
| ENSG00000248801 | ENSG00000165084 |
| ENSG00000227463 | ENSG00000165113 |
| ENSG00000227531 | ENSG00000165124 |
| ENSG00000226484 | ENSG00000165164 |
| ENSG00000276476 | ENSG00000165480 |
| ENSG00000245832 | ENSG00000165490 |
| ENSG00000258776 | ENSG00000165588 |
| ENSG00000234248 | ENSG00000165632 |
| ENSG00000257275 | ENSG00000165959 |
| ENSG00000251364 | ENSG00000166387 |
| ENSG00000254951 | ENSG00000166387 |
| ENSG00000251364 | ENSG00000166407 |
| ENSG00000254951 | ENSG00000166407 |
| ENSG00000261303 | ENSG00000166426 |
| ENSG00000245059 | ENSG00000166455 |
| ENSG00000259867 | ENSG00000166455 |
| ENSG00000260643 | ENSG00000166455 |
| ENSG00000260706 | ENSG00000166455 |
| ENSG00000260896 | ENSG00000166455 |
| ENSG00000259240 | ENSG00000166477 |
| ENSG00000002079 | ENSG00000166526 |
| ENSG00000256594 | ENSG00000166535 |
| ENSG00000261742 | ENSG00000166546 |
| ENSG00000257452 | ENSG00000166578 |
| ENSG00000255308 | ENSG00000166800 |
| ENSG00000260123 | ENSG00000166823 |
| ENSG00000261723 | ENSG00000166851 |
| ENSG00000259200 | ENSG00000166920 |
| ENSG00000259342 | ENSG00000166920 |
| ENSG00000259354 | ENSG00000166920 |
| ENSG00000259200 | ENSG00000167014 |
| ENSG00000253535 | ENSG00000167034 |
| ENSG00000267193 | ENSG00000167210 |
| ENSG00000267761 | ENSG00000167210 |
| ENSG00000258232 | ENSG00000167553 |
| ENSG00000251637 | ENSG00000167797 |
| ENSG00000273819 | ENSG00000167797 |
| ENSG00000267506 | ENSG00000167889 |
| ENSG00000282199 | ENSG00000167941 |
| ENSG00000253397 | ENSG00000168078 |
| ENSG00000227835 | ENSG00000168263 |
| ENSG00000236404 | ENSG00000168263 |

|                 |                 |
|-----------------|-----------------|
| ENSG00000239718 | ENSG00000071794 |
| ENSG00000232725 | ENSG00000071859 |
| ENSG00000280195 | ENSG00000071859 |
| ENSG00000265533 | ENSG00000071991 |
| ENSG00000227685 | ENSG00000072210 |
| ENSG00000228983 | ENSG00000072210 |
| ENSG00000231625 | ENSG00000072210 |
| ENSG00000262769 | ENSG00000072210 |
| ENSG00000264885 | ENSG00000072210 |
| ENSG00000185485 | ENSG00000072274 |
| ENSG00000235253 | ENSG00000072364 |
| ENSG00000250790 | ENSG00000072609 |
| ENSG00000223442 | ENSG00000072682 |
| ENSG00000230612 | ENSG00000072682 |
| ENSG00000233006 | ENSG00000072682 |
| ENSG00000237714 | ENSG00000072682 |
| ENSG00000215067 | ENSG00000072778 |
| ENSG00000215067 | ENSG00000072818 |
| ENSG00000261879 | ENSG00000072849 |
| ENSG00000241560 | ENSG00000072858 |
| ENSG00000269439 | ENSG00000072954 |
| ENSG00000266903 | ENSG00000073008 |
| ENSG00000267282 | ENSG00000073008 |
| ENSG00000230487 | ENSG00000073067 |
| ENSG00000273253 | ENSG00000073150 |
| ENSG00000272836 | ENSG00000073169 |
| ENSG00000273137 | ENSG00000073169 |
| ENSG00000273253 | ENSG00000073169 |
| ENSG00000189136 | ENSG00000073417 |
| ENSG00000230373 | ENSG00000073417 |
| ENSG00000277089 | ENSG00000073536 |
| ENSG00000260774 | ENSG00000073578 |
| ENSG00000197099 | ENSG00000073792 |
| ENSG00000223358 | ENSG00000073792 |
| ENSG00000223358 | ENSG00000073803 |
| ENSG00000197099 | ENSG00000073849 |
| ENSG00000228804 | ENSG00000073849 |
| ENSG00000246523 | ENSG00000073921 |
| ENSG00000224789 | ENSG00000074047 |
| ENSG00000236859 | ENSG00000074047 |
| ENSG00000260316 | ENSG00000074071 |
| ENSG00000246174 | ENSG00000074201 |
| ENSG00000235191 | ENSG00000074219 |
| ENSG00000255471 | ENSG00000074266 |
| ENSG00000246334 | ENSG00000074276 |
| ENSG00000244300 | ENSG00000074416 |
| ENSG00000229754 | ENSG00000074582 |
| ENSG00000231035 | ENSG00000074582 |

|                 |                 |
|-----------------|-----------------|
| ENSG00000261584 | ENSG00000168298 |
| ENSG00000250685 | ENSG00000168418 |
| ENSG00000233766 | ENSG00000168497 |
| ENSG00000259867 | ENSG00000168589 |
| ENSG00000260643 | ENSG00000168589 |
| ENSG00000260706 | ENSG00000168589 |
| ENSG00000246228 | ENSG00000168672 |
| ENSG00000253438 | ENSG00000168672 |
| ENSG00000253929 | ENSG00000168672 |
| ENSG00000254286 | ENSG00000168672 |
| ENSG00000245384 | ENSG00000168772 |
| ENSG00000248242 | ENSG00000168772 |
| ENSG00000248373 | ENSG00000168772 |
| ENSG00000251577 | ENSG00000168772 |
| ENSG00000247708 | ENSG00000168826 |
| ENSG00000257986 | ENSG00000168952 |
| ENSG00000239523 | ENSG00000169087 |
| ENSG00000223742 | ENSG00000169306 |
| ENSG00000187812 | ENSG00000169375 |
| ENSG00000235944 | ENSG00000169402 |
| ENSG00000231386 | ENSG00000169564 |
| ENSG00000227359 | ENSG00000169607 |
| ENSG00000187812 | ENSG00000169752 |
| ENSG00000187812 | ENSG00000169758 |
| ENSG00000260357 | ENSG00000169758 |
| ENSG00000260139 | ENSG00000169783 |
| ENSG00000261303 | ENSG00000169783 |
| ENSG00000245384 | ENSG00000169836 |
| ENSG00000251577 | ENSG00000169836 |
| ENSG00000248131 | ENSG00000169862 |
| ENSG00000251003 | ENSG00000169946 |
| ENSG00000251687 | ENSG00000170365 |
| ENSG00000234828 | ENSG00000170390 |
| ENSG00000248210 | ENSG00000170390 |
| ENSG00000241956 | ENSG00000170584 |
| ENSG00000255946 | ENSG00000170633 |
| ENSG00000251364 | ENSG00000170743 |
| ENSG00000184608 | ENSG00000171056 |
| ENSG00000260093 | ENSG00000171056 |
| ENSG00000254777 | ENSG00000171316 |
| ENSG00000227308 | ENSG00000171450 |
| ENSG00000234477 | ENSG00000171475 |
| ENSG00000235974 | ENSG00000171649 |
| ENSG00000225868 | ENSG00000171804 |
| ENSG00000225868 | ENSG00000171827 |
| ENSG00000267605 | ENSG00000171827 |
| ENSG00000259370 | ENSG00000171914 |
| ENSG00000259616 | ENSG00000171914 |

|                 |                 |
|-----------------|-----------------|
| ENSG00000268603 | ENSG00000074582 |
| ENSG00000263219 | ENSG00000074755 |
| ENSG00000228526 | ENSG00000074800 |
| ENSG00000236269 | ENSG00000074800 |
| ENSG00000205790 | ENSG00000074842 |
| ENSG00000273654 | ENSG00000074855 |
| ENSG00000268869 | ENSG00000074964 |
| ENSG00000277232 | ENSG00000075234 |
| ENSG00000228113 | ENSG00000075303 |
| ENSG00000242193 | ENSG00000075391 |
| ENSG00000254154 | ENSG00000075391 |
| ENSG00000223959 | ENSG00000075399 |
| ENSG00000260617 | ENSG00000075399 |
| ENSG00000229951 | ENSG00000075426 |
| ENSG00000228486 | ENSG00000075568 |
| ENSG00000260552 | ENSG00000075643 |
| ENSG00000206417 | ENSG00000075785 |
| ENSG00000244300 | ENSG00000075785 |
| ENSG00000261159 | ENSG00000075785 |
| ENSG00000231407 | ENSG00000075945 |
| ENSG00000256947 | ENSG00000076053 |
| ENSG00000227398 | ENSG00000076201 |
| ENSG00000230067 | ENSG00000076242 |
| ENSG00000235257 | ENSG00000076242 |
| ENSG00000227543 | ENSG00000076351 |
| ENSG00000260777 | ENSG00000076351 |
| ENSG00000266642 | ENSG00000076351 |
| ENSG00000203709 | ENSG00000076356 |
| ENSG00000255650 | ENSG00000076513 |
| ENSG00000258210 | ENSG00000076513 |
| ENSG00000256139 | ENSG00000076555 |
| ENSG00000257221 | ENSG00000076555 |
| ENSG00000264031 | ENSG00000076604 |
| ENSG00000264486 | ENSG00000076604 |
| ENSG00000266527 | ENSG00000076604 |
| ENSG00000274425 | ENSG00000076662 |
| ENSG00000282772 | ENSG00000076685 |
| ENSG00000232160 | ENSG00000076770 |
| ENSG00000268297 | ENSG00000076826 |
| ENSG00000268204 | ENSG00000076924 |
| ENSG00000213904 | ENSG00000076928 |
| ENSG00000268027 | ENSG00000076928 |
| ENSG00000268204 | ENSG00000076944 |
| ENSG00000268758 | ENSG00000076944 |
| ENSG00000226688 | ENSG00000077147 |
| ENSG00000231871 | ENSG00000077157 |
| ENSG00000235121 | ENSG00000077157 |
| ENSG00000261329 | ENSG00000077235 |

|                 |                 |
|-----------------|-----------------|
| ENSG00000259675 | ENSG00000171914 |
| ENSG00000227463 | ENSG00000172159 |
| ENSG00000233358 | ENSG00000172179 |
| ENSG00000272168 | ENSG00000172179 |
| ENSG00000243797 | ENSG00000172209 |
| ENSG00000249203 | ENSG00000172244 |
| ENSG00000260177 | ENSG00000172530 |
| ENSG00000256663 | ENSG00000172572 |
| ENSG00000256879 | ENSG00000172572 |
| ENSG00000259380 | ENSG00000172575 |
| ENSG00000258232 | ENSG00000172602 |
| ENSG00000245748 | ENSG00000173013 |
| ENSG00000268894 | ENSG00000173145 |
| ENSG00000239523 | ENSG00000173175 |
| ENSG00000227531 | ENSG00000173258 |
| ENSG00000255308 | ENSG00000173432 |
| ENSG00000234477 | ENSG00000173805 |
| ENSG00000224652 | ENSG00000174013 |
| ENSG00000247193 | ENSG00000174145 |
| ENSG00000247213 | ENSG00000174527 |
| ENSG00000249532 | ENSG00000174720 |
| ENSG00000249815 | ENSG00000174720 |
| ENSG00000206120 | ENSG00000174776 |
| ENSG00000239227 | ENSG00000174776 |
| ENSG00000184617 | ENSG00000175063 |
| ENSG00000198491 | ENSG00000175077 |
| ENSG00000257219 | ENSG00000175183 |
| ENSG00000258077 | ENSG00000175183 |
| ENSG00000262983 | ENSG00000175267 |
| ENSG00000271989 | ENSG00000175279 |
| ENSG00000253773 | ENSG00000175305 |
| ENSG00000253872 | ENSG00000175305 |
| ENSG00000250551 | ENSG00000175449 |
| ENSG00000253392 | ENSG00000175691 |
| ENSG00000248538 | ENSG00000175806 |
| ENSG00000254235 | ENSG00000175806 |
| ENSG00000265688 | ENSG00000175866 |
| ENSG00000230552 | ENSG00000175879 |
| ENSG00000236231 | ENSG00000175879 |
| ENSG00000275874 | ENSG00000175894 |
| ENSG00000282199 | ENSG00000175906 |
| ENSG00000231607 | ENSG00000176124 |
| ENSG00000265334 | ENSG00000176208 |
| ENSG00000266258 | ENSG00000176225 |
| ENSG00000218052 | ENSG00000176371 |
| ENSG00000256278 | ENSG00000176371 |
| ENSG00000275120 | ENSG00000176371 |
| ENSG00000234840 | ENSG00000176399 |

|                 |                 |
|-----------------|-----------------|
| ENSG00000256612 | ENSG00000077312 |
| ENSG00000267107 | ENSG00000077312 |
| ENSG00000237118 | ENSG00000077348 |
| ENSG00000268027 | ENSG00000077348 |
| ENSG00000244219 | ENSG00000077454 |
| ENSG00000274272 | ENSG00000077454 |
| ENSG00000267436 | ENSG00000077463 |
| ENSG00000235371 | ENSG00000077522 |
| ENSG00000225986 | ENSG00000077549 |
| ENSG00000251432 | ENSG00000077684 |
| ENSG00000261668 | ENSG00000077684 |
| ENSG00000233382 | ENSG00000077721 |
| ENSG00000258545 | ENSG00000077721 |
| ENSG00000234281 | ENSG00000078018 |
| ENSG00000254988 | ENSG00000078124 |
| ENSG00000249348 | ENSG00000078140 |
| ENSG00000218226 | ENSG00000078269 |
| ENSG00000182873 | ENSG00000078369 |
| ENSG00000269896 | ENSG00000078369 |
| ENSG00000278530 | ENSG00000078596 |
| ENSG00000266993 | ENSG00000078618 |
| ENSG00000230753 | ENSG00000078699 |
| ENSG00000230753 | ENSG00000078747 |
| ENSG00000177757 | ENSG00000078808 |
| ENSG00000223764 | ENSG00000078808 |
| ENSG00000237491 | ENSG00000078808 |
| ENSG00000260179 | ENSG00000078808 |
| ENSG00000272512 | ENSG00000078808 |
| ENSG00000088340 | ENSG00000078814 |
| ENSG00000214783 | ENSG00000078967 |
| ENSG00000239556 | ENSG00000078967 |
| ENSG00000273432 | ENSG00000078967 |
| ENSG00000263006 | ENSG00000079134 |
| ENSG00000237298 | ENSG00000079150 |
| ENSG00000213963 | ENSG00000079156 |
| ENSG00000237298 | ENSG00000079156 |
| ENSG00000225166 | ENSG00000079246 |
| ENSG00000235042 | ENSG00000079246 |
| ENSG00000236886 | ENSG00000079246 |
| ENSG00000243150 | ENSG00000079257 |
| ENSG00000260940 | ENSG00000079335 |
| ENSG00000247774 | ENSG00000079337 |
| ENSG00000257261 | ENSG00000079337 |
| ENSG00000257735 | ENSG00000079337 |
| ENSG00000213904 | ENSG00000079385 |
| ENSG00000257735 | ENSG00000079387 |
| ENSG00000269514 | ENSG00000079387 |
| ENSG00000213904 | ENSG00000079432 |

|                 |                 |
|-----------------|-----------------|
| ENSG00000223813 | ENSG00000176532 |
| ENSG00000253500 | ENSG00000176571 |
| ENSG00000227538 | ENSG00000177181 |
| ENSG00000235749 | ENSG00000177275 |
| ENSG00000235526 | ENSG00000177301 |
| ENSG00000227107 | ENSG00000177483 |
| ENSG00000281641 | ENSG00000177570 |
| ENSG00000261848 | ENSG00000177602 |
| ENSG00000255028 | ENSG00000178105 |
| ENSG00000178412 | ENSG00000178184 |
| ENSG00000267251 | ENSG00000178184 |
| ENSG00000231039 | ENSG00000178462 |
| ENSG00000273118 | ENSG00000178568 |
| ENSG00000227463 | ENSG00000178966 |
| ENSG00000265975 | ENSG00000179148 |
| ENSG00000178464 | ENSG00000179284 |
| ENSG00000267710 | ENSG00000179709 |
| ENSG00000231918 | ENSG00000179915 |
| ENSG00000184100 | ENSG00000180044 |
| ENSG00000261848 | ENSG00000180090 |
| ENSG00000262670 | ENSG00000180090 |
| ENSG00000257400 | ENSG00000180263 |
| ENSG00000258343 | ENSG00000180263 |
| ENSG00000167355 | ENSG00000180785 |
| ENSG00000227308 | ENSG00000181378 |
| ENSG00000234828 | ENSG00000181541 |
| ENSG00000226337 | ENSG00000181778 |
| ENSG00000249534 | ENSG00000181826 |
| ENSG00000245768 | ENSG00000181938 |
| ENSG00000245832 | ENSG00000182103 |
| ENSG00000255311 | ENSG00000182103 |
| ENSG00000257060 | ENSG00000182175 |
| ENSG00000258631 | ENSG00000182175 |
| ENSG00000258754 | ENSG00000182175 |
| ENSG00000258785 | ENSG00000182175 |
| ENSG00000260661 | ENSG00000182175 |
| ENSG00000235160 | ENSG00000182256 |
| ENSG00000254951 | ENSG00000182334 |
| ENSG00000227863 | ENSG00000182348 |
| ENSG00000237654 | ENSG00000182667 |
| ENSG00000235531 | ENSG00000182674 |
| ENSG00000258871 | ENSG00000182732 |
| ENSG00000227028 | ENSG00000183023 |
| ENSG00000258342 | ENSG00000183032 |
| ENSG00000236885 | ENSG00000183091 |
| ENSG00000257004 | ENSG00000183150 |
| ENSG00000248636 | ENSG00000183273 |
| ENSG00000254951 | ENSG00000183378 |

|                 |                 |
|-----------------|-----------------|
| ENSG00000267107 | ENSG00000079432 |
| ENSG00000213904 | ENSG00000079435 |
| ENSG00000231561 | ENSG00000079435 |
| ENSG00000268475 | ENSG00000079435 |
| ENSG00000168405 | ENSG00000079689 |
| ENSG00000272053 | ENSG00000079689 |
| ENSG00000233718 | ENSG00000079785 |
| ENSG00000266978 | ENSG00000079805 |
| ENSG00000184319 | ENSG00000079974 |
| ENSG00000267082 | ENSG00000079999 |
| ENSG00000274425 | ENSG00000079999 |
| ENSG00000267265 | ENSG00000080031 |
| ENSG00000267649 | ENSG00000080031 |
| ENSG00000225849 | ENSG00000080189 |
| ENSG00000273828 | ENSG00000080189 |
| ENSG00000231013 | ENSG00000080293 |
| ENSG00000232104 | ENSG00000080298 |
| ENSG00000238045 | ENSG00000080603 |
| ENSG00000239791 | ENSG00000080603 |
| ENSG00000261346 | ENSG00000080603 |
| ENSG00000278133 | ENSG00000080603 |
| ENSG00000239462 | ENSG00000080819 |
| ENSG00000088340 | ENSG00000080845 |
| ENSG00000232907 | ENSG00000080845 |
| ENSG00000251226 | ENSG00000080854 |
| ENSG00000215866 | ENSG00000081019 |
| ENSG00000226167 | ENSG00000081019 |
| ENSG00000226419 | ENSG00000081019 |
| ENSG00000238198 | ENSG00000081019 |
| ENSG00000249942 | ENSG00000081041 |
| ENSG00000236432 | ENSG00000081052 |
| ENSG00000245864 | ENSG00000081189 |
| ENSG00000248309 | ENSG00000081189 |
| ENSG00000240890 | ENSG00000081307 |
| ENSG00000248724 | ENSG00000081307 |
| ENSG00000229056 | ENSG00000081320 |
| ENSG00000266904 | ENSG00000081665 |
| ENSG00000267419 | ENSG00000081665 |
| ENSG00000267565 | ENSG00000081665 |
| ENSG00000269019 | ENSG00000081665 |
| ENSG00000272154 | ENSG00000081791 |
| ENSG00000278936 | ENSG00000081853 |
| ENSG00000280029 | ENSG00000081853 |
| ENSG00000244968 | ENSG00000082074 |
| ENSG00000249740 | ENSG00000082074 |
| ENSG00000223825 | ENSG00000082146 |
| ENSG00000215158 | ENSG00000082196 |
| ENSG00000227115 | ENSG00000082212 |

|                 |                 |
|-----------------|-----------------|
| ENSG00000235974 | ENSG00000183647 |
| ENSG00000246214 | ENSG00000183654 |
| ENSG00000248150 | ENSG00000183654 |
| ENSG00000214018 | ENSG00000183690 |
| ENSG00000223838 | ENSG00000183742 |
| ENSG00000243004 | ENSG00000183742 |
| ENSG00000251364 | ENSG00000183801 |
| ENSG00000254951 | ENSG00000183801 |
| ENSG00000264956 | ENSG00000184185 |
| ENSG00000266466 | ENSG00000184185 |
| ENSG00000277215 | ENSG00000184258 |
| ENSG00000248222 | ENSG00000184347 |
| ENSG00000249601 | ENSG00000184347 |
| ENSG00000254042 | ENSG00000184347 |
| ENSG00000251027 | ENSG00000184349 |
| ENSG00000271860 | ENSG00000184486 |
| ENSG00000237844 | ENSG00000184611 |
| ENSG00000253535 | ENSG00000184661 |
| ENSG00000254202 | ENSG00000184672 |
| ENSG00000229855 | ENSG00000184838 |
| ENSG00000260643 | ENSG00000184860 |
| ENSG00000260862 | ENSG00000184860 |
| ENSG00000225329 | ENSG00000185055 |
| ENSG00000243797 | ENSG00000185055 |
| ENSG00000267052 | ENSG00000185055 |
| ENSG00000251209 | ENSG00000185087 |
| ENSG00000247400 | ENSG00000185352 |
| ENSG00000257060 | ENSG00000185442 |
| ENSG00000258754 | ENSG00000185442 |
| ENSG00000260661 | ENSG00000185442 |
| ENSG00000002079 | ENSG00000185467 |
| ENSG00000261127 | ENSG00000185947 |
| ENSG00000261727 | ENSG00000185947 |
| ENSG00000261540 | ENSG00000186153 |
| ENSG00000271860 | ENSG00000186231 |
| ENSG00000250407 | ENSG00000186314 |
| ENSG00000251031 | ENSG00000186314 |
| ENSG00000251165 | ENSG00000186352 |
| ENSG00000254233 | ENSG00000186352 |
| ENSG00000232642 | ENSG00000186453 |
| ENSG00000258535 | ENSG00000186469 |
| ENSG00000257452 | ENSG00000186710 |
| ENSG00000198155 | ENSG00000186777 |
| ENSG00000173811 | ENSG00000187094 |
| ENSG00000257219 | ENSG00000187109 |
| ENSG00000258077 | ENSG00000187109 |
| ENSG00000197085 | ENSG00000187258 |
| ENSG00000254485 | ENSG00000187288 |

|                 |                 |
|-----------------|-----------------|
| ENSG00000224043 | ENSG00000082258 |
| ENSG00000153363 | ENSG00000082512 |
| ENSG00000263412 | ENSG00000082641 |
| ENSG00000263766 | ENSG00000082641 |
| ENSG00000264701 | ENSG00000082641 |
| ENSG00000242622 | ENSG00000082701 |
| ENSG00000241278 | ENSG00000082781 |
| ENSG00000241288 | ENSG00000082781 |
| ENSG00000165121 | ENSG00000083223 |
| ENSG00000234424 | ENSG00000083223 |
| ENSG00000236581 | ENSG00000083642 |
| ENSG00000248668 | ENSG00000083720 |
| ENSG00000213753 | ENSG00000083807 |
| ENSG00000232098 | ENSG00000083807 |
| ENSG00000267858 | ENSG00000083807 |
| ENSG00000268230 | ENSG00000083807 |
| ENSG00000269054 | ENSG00000083807 |
| ENSG00000269106 | ENSG00000083807 |
| ENSG00000269473 | ENSG00000083807 |
| ENSG00000268516 | ENSG00000083814 |
| ENSG00000213753 | ENSG00000083838 |
| ENSG00000267858 | ENSG00000083838 |
| ENSG00000269054 | ENSG00000083838 |
| ENSG00000267871 | ENSG00000083844 |
| ENSG00000269867 | ENSG00000083844 |
| ENSG00000248049 | ENSG00000083896 |
| ENSG00000281207 | ENSG00000084070 |
| ENSG00000231296 | ENSG00000084073 |
| ENSG00000238287 | ENSG00000084073 |
| ENSG00000245067 | ENSG00000084093 |
| ENSG00000248590 | ENSG00000084093 |
| ENSG00000255650 | ENSG00000084112 |
| ENSG00000247498 | ENSG00000084444 |
| ENSG00000255621 | ENSG00000084444 |
| ENSG00000220785 | ENSG00000084623 |
| ENSG00000235790 | ENSG00000084623 |
| ENSG00000220785 | ENSG00000084628 |
| ENSG00000235790 | ENSG00000084652 |
| ENSG00000232800 | ENSG00000084674 |
| ENSG00000227938 | ENSG00000084734 |
| ENSG00000248503 | ENSG00000085224 |
| ENSG00000225361 | ENSG00000085265 |
| ENSG00000260879 | ENSG00000085491 |
| ENSG00000078319 | ENSG00000085514 |
| ENSG00000242294 | ENSG00000085514 |
| ENSG00000242798 | ENSG00000085514 |
| ENSG00000272752 | ENSG00000085514 |
| ENSG00000182165 | ENSG00000085563 |

|                 |                 |
|-----------------|-----------------|
| ENSG00000225329 | ENSG00000187416 |
| ENSG00000234715 | ENSG00000187416 |
| ENSG00000229688 | ENSG00000187546 |
| ENSG00000226530 | ENSG00000187690 |
| ENSG00000229151 | ENSG00000187690 |
| ENSG00000260586 | ENSG00000187720 |
| ENSG00000258700 | ENSG00000187790 |
| ENSG00000258969 | ENSG00000187790 |
| ENSG00000258998 | ENSG00000187790 |
| ENSG00000230131 | ENSG00000187908 |
| ENSG00000257599 | ENSG00000187950 |
| ENSG00000267123 | ENSG00000187997 |
| ENSG00000267466 | ENSG00000187997 |
| ENSG00000225258 | ENSG00000188452 |
| ENSG00000281131 | ENSG00000188452 |
| ENSG00000254695 | ENSG00000188487 |
| ENSG00000254789 | ENSG00000188487 |
| ENSG00000254946 | ENSG00000188487 |
| ENSG00000258131 | ENSG00000188596 |
| ENSG00000258343 | ENSG00000188596 |
| ENSG00000226747 | ENSG00000188738 |
| ENSG00000259410 | ENSG00000188779 |
| ENSG00000259673 | ENSG00000188779 |
| ENSG00000259343 | ENSG00000188869 |
| ENSG00000259445 | ENSG00000188869 |
| ENSG00000259692 | ENSG00000188869 |
| ENSG00000247213 | ENSG00000189046 |
| ENSG00000234715 | ENSG00000189056 |
| ENSG00000214788 | ENSG00000189057 |
| ENSG00000259410 | ENSG00000189227 |
| ENSG00000259673 | ENSG00000189227 |
| ENSG00000230649 | ENSG00000189320 |
| ENSG00000232053 | ENSG00000189320 |
| ENSG00000226191 | ENSG00000196071 |
| ENSG00000159712 | ENSG00000196116 |
| ENSG00000266357 | ENSG00000196169 |
| ENSG00000225868 | ENSG00000196218 |
| ENSG00000226530 | ENSG00000196368 |
| ENSG00000267174 | ENSG00000196646 |
| ENSG00000258279 | ENSG00000196876 |
| ENSG00000262983 | ENSG00000197006 |
| ENSG00000246662 | ENSG00000197275 |
| ENSG00000253585 | ENSG00000197275 |
| ENSG00000253773 | ENSG00000197275 |
| ENSG00000214432 | ENSG00000197299 |
| ENSG00000214433 | ENSG00000197299 |
| ENSG00000259248 | ENSG00000197361 |
| ENSG00000259370 | ENSG00000197361 |

|                 |                 |
|-----------------|-----------------|
| ENSG00000228113 | ENSG00000085563 |
| ENSG00000205890 | ENSG00000085644 |
| ENSG00000263072 | ENSG00000085644 |
| ENSG00000254231 | ENSG00000085719 |
| ENSG00000254604 | ENSG00000085733 |
| ENSG00000232022 | ENSG00000085998 |
| ENSG00000232022 | ENSG00000086015 |
| ENSG00000226562 | ENSG00000086062 |
| ENSG00000233554 | ENSG00000086062 |
| ENSG00000232303 | ENSG00000086102 |
| ENSG00000235453 | ENSG00000086102 |
| ENSG00000257378 | ENSG00000086159 |
| ENSG00000257588 | ENSG00000086159 |
| ENSG00000258057 | ENSG00000086159 |
| ENSG00000272368 | ENSG00000086159 |
| ENSG00000236829 | ENSG00000086504 |
| ENSG00000260316 | ENSG00000086504 |
| ENSG00000267107 | ENSG00000086544 |
| ENSG00000249035 | ENSG00000086589 |
| ENSG00000247373 | ENSG00000086598 |
| ENSG00000214544 | ENSG00000086730 |
| ENSG00000232593 | ENSG00000086758 |
| ENSG00000205959 | ENSG00000087008 |
| ENSG00000249767 | ENSG00000087008 |
| ENSG00000078319 | ENSG00000087077 |
| ENSG00000242294 | ENSG00000087077 |
| ENSG00000272752 | ENSG00000087077 |
| ENSG00000232871 | ENSG00000087088 |
| ENSG00000235191 | ENSG00000087088 |
| ENSG00000227543 | ENSG00000087095 |
| ENSG00000266527 | ENSG00000087095 |
| ENSG00000224505 | ENSG00000087152 |
| ENSG00000267121 | ENSG00000087152 |
| ENSG00000267394 | ENSG00000087152 |
| ENSG00000251229 | ENSG00000087266 |
| ENSG00000249673 | ENSG00000087269 |
| ENSG00000249673 | ENSG00000087274 |
| ENSG00000251229 | ENSG00000087274 |
| ENSG00000214900 | ENSG00000087299 |
| ENSG00000237356 | ENSG00000087301 |
| ENSG00000255038 | ENSG00000087365 |
| ENSG00000247903 | ENSG00000087494 |
| ENSG00000257042 | ENSG00000087494 |
| ENSG00000246174 | ENSG00000087884 |
| ENSG00000268758 | ENSG00000087903 |
| ENSG00000265702 | ENSG00000087995 |
| ENSG00000267265 | ENSG00000088038 |
| ENSG00000224789 | ENSG00000088179 |

|                 |                 |
|-----------------|-----------------|
| ENSG00000249041 | ENSG00000197410 |
| ENSG00000280241 | ENSG00000197410 |
| ENSG00000235749 | ENSG00000197472 |
| ENSG00000254369 | ENSG00000197576 |
| ENSG00000260643 | ENSG00000197943 |
| ENSG00000264693 | ENSG00000197971 |
| ENSG00000227531 | ENSG00000198121 |
| ENSG00000255027 | ENSG00000198331 |
| ENSG00000233009 | ENSG00000198542 |
| ENSG00000261008 | ENSG00000198650 |
| ENSG00000248714 | ENSG00000198740 |
| ENSG00000250751 | ENSG00000198740 |
| ENSG00000249856 | ENSG00000198780 |
| ENSG00000258342 | ENSG00000198807 |
| ENSG00000214432 | ENSG00000198901 |
| ENSG00000258725 | ENSG00000198901 |
| ENSG00000229989 | ENSG00000203724 |
| ENSG00000231842 | ENSG00000203760 |
| ENSG00000237742 | ENSG00000203760 |
| ENSG00000223786 | ENSG00000203907 |
| ENSG00000231332 | ENSG00000203907 |
| ENSG00000223786 | ENSG00000203908 |
| ENSG00000267710 | ENSG00000204524 |
| ENSG00000234477 | ENSG00000204815 |
| ENSG00000260162 | ENSG00000205022 |
| ENSG00000261327 | ENSG00000205022 |
| ENSG00000214691 | ENSG00000205086 |
| ENSG00000227028 | ENSG00000205111 |
| ENSG00000231312 | ENSG00000205111 |
| ENSG00000251165 | ENSG00000205129 |
| ENSG00000254233 | ENSG00000205129 |
| ENSG00000261127 | ENSG00000205456 |
| ENSG00000258871 | ENSG00000205683 |
| ENSG00000234626 | ENSG00000205853 |
| ENSG00000267134 | ENSG00000206075 |
| ENSG00000225548 | ENSG00000206559 |
| ENSG00000246228 | ENSG00000212993 |
| ENSG00000253438 | ENSG00000212993 |
| ENSG00000254286 | ENSG00000212993 |
| ENSG00000235994 | ENSG00000213066 |
| ENSG00000230131 | ENSG00000213185 |
| ENSG00000269043 | ENSG00000213988 |
| ENSG00000228775 | ENSG00000214102 |
| ENSG00000267174 | ENSG00000214212 |
| ENSG00000277851 | ENSG00000214215 |
| ENSG00000240207 | ENSG00000214216 |
| ENSG00000279159 | ENSG00000214491 |
| ENSG00000227028 | ENSG00000214694 |



|                 |                 |
|-----------------|-----------------|
| ENSG00000225315 | ENSG00000088280 |
| ENSG00000088340 | ENSG00000088298 |
| ENSG00000272945 | ENSG00000088298 |
| ENSG00000232907 | ENSG00000088367 |
| ENSG00000235016 | ENSG00000088543 |
| ENSG00000265933 | ENSG00000088756 |
| ENSG00000235958 | ENSG00000088812 |
| ENSG00000235958 | ENSG00000088827 |
| ENSG00000234684 | ENSG00000088832 |
| ENSG00000235958 | ENSG00000088899 |
| ENSG00000249550 | ENSG00000089060 |
| ENSG00000249550 | ENSG00000089127 |
| ENSG00000255857 | ENSG00000089154 |
| ENSG00000255857 | ENSG00000089159 |
| ENSG00000230267 | ENSG00000089280 |
| ENSG00000239791 | ENSG00000089280 |
| ENSG00000261416 | ENSG00000089280 |
| ENSG00000267049 | ENSG00000089327 |
| ENSG00000271032 | ENSG00000089351 |
| ENSG00000254454 | ENSG00000089597 |
| ENSG00000231205 | ENSG00000089639 |
| ENSG00000269019 | ENSG00000089639 |
| ENSG00000240370 | ENSG00000089692 |
| ENSG00000205885 | ENSG00000089693 |
| ENSG00000258824 | ENSG00000089775 |
| ENSG00000259116 | ENSG00000089775 |
| ENSG00000164845 | ENSG00000089818 |
| ENSG00000205885 | ENSG00000089818 |
| ENSG00000256552 | ENSG00000089818 |
| ENSG00000232725 | ENSG00000089820 |
| ENSG00000130612 | ENSG00000090006 |
| ENSG00000267107 | ENSG00000090006 |
| ENSG00000237118 | ENSG00000090013 |
| ENSG00000234537 | ENSG00000090054 |
| ENSG00000235641 | ENSG00000090054 |
| ENSG00000258504 | ENSG00000090061 |
| ENSG00000258666 | ENSG00000090061 |
| ENSG00000258982 | ENSG00000090061 |
| ENSG00000239799 | ENSG00000090097 |
| ENSG00000196810 | ENSG00000090316 |
| ENSG00000269487 | ENSG00000090372 |
| ENSG00000241749 | ENSG00000090376 |
| ENSG00000250748 | ENSG00000090376 |
| ENSG00000256248 | ENSG00000090376 |
| ENSG00000262686 | ENSG00000090447 |
| ENSG00000197099 | ENSG00000090520 |
| ENSG00000233441 | ENSG00000090539 |
| ENSG00000271963 | ENSG00000090612 |

|                 |                 |
|-----------------|-----------------|
| ENSG00000231312 | ENSG00000214694 |
| ENSG00000232518 | ENSG00000214694 |
| ENSG00000214803 | ENSG00000214814 |
| ENSG00000253868 | ENSG00000214814 |
| ENSG00000236318 | ENSG00000214960 |
| ENSG00000260569 | ENSG00000215421 |
| ENSG00000263655 | ENSG00000215421 |
| ENSG00000188511 | ENSG00000219438 |
| ENSG00000224271 | ENSG00000219438 |
| ENSG00000253100 | ENSG00000221818 |
| ENSG00000224865 | ENSG00000221866 |
| ENSG00000259342 | ENSG00000229474 |
| ENSG00000259354 | ENSG00000229474 |
| ENSG00000267606 | ENSG00000231274 |
| ENSG00000261303 | ENSG00000235711 |
| ENSG00000002079 | ENSG00000239521 |
| ENSG00000227308 | ENSG00000243910 |
| ENSG00000214198 | ENSG00000255150 |
| ENSG00000239426 | ENSG00000255298 |
| ENSG00000265101 | ENSG00000256463 |
| ENSG00000267287 | ENSG00000256463 |
| ENSG00000258913 | ENSG00000258986 |
| ENSG00000260172 | ENSG00000263155 |
| ENSG00000267710 | ENSG00000269699 |

|                 |                 |
|-----------------|-----------------|
| ENSG00000268758 | ENSG00000090659 |
| ENSG00000269386 | ENSG00000090674 |
| ENSG00000269680 | ENSG00000090674 |
| ENSG00000196696 | ENSG00000090861 |
| ENSG00000214353 | ENSG00000090861 |
| ENSG00000261556 | ENSG00000090861 |
| ENSG00000205041 | ENSG00000090924 |
| ENSG00000256249 | ENSG00000090975 |
| ENSG00000243193 | ENSG00000091138 |
| ENSG00000225205 | ENSG00000091409 |
| ENSG00000238133 | ENSG00000091409 |
| ENSG00000225205 | ENSG00000091428 |
| ENSG00000226963 | ENSG00000091428 |
| ENSG00000238133 | ENSG00000091428 |
| ENSG00000225205 | ENSG00000091436 |
| ENSG00000238133 | ENSG00000091436 |
| ENSG00000225554 | ENSG00000091483 |
| ENSG00000242337 | ENSG00000091513 |
| ENSG00000248724 | ENSG00000091513 |
| ENSG00000242337 | ENSG00000091527 |
| ENSG00000248724 | ENSG00000091527 |
| ENSG00000154874 | ENSG00000091536 |
| ENSG00000197815 | ENSG00000091536 |
| ENSG00000263624 | ENSG00000091536 |
| ENSG00000266677 | ENSG00000091536 |
| ENSG00000261879 | ENSG00000091592 |
| ENSG00000215067 | ENSG00000091622 |
| ENSG00000256806 | ENSG00000091622 |
| ENSG00000157306 | ENSG00000092010 |
| ENSG00000215256 | ENSG00000092010 |
| ENSG00000260669 | ENSG00000092010 |
| ENSG00000215256 | ENSG00000092051 |
| ENSG00000258457 | ENSG00000092051 |
| ENSG00000258458 | ENSG00000092051 |
| ENSG00000258515 | ENSG00000092094 |
| ENSG00000215256 | ENSG00000092096 |
| ENSG00000258458 | ENSG00000092096 |
| ENSG00000215256 | ENSG00000092098 |
| ENSG00000157306 | ENSG00000092330 |
| ENSG00000215256 | ENSG00000092330 |
| ENSG00000248445 | ENSG00000092421 |
| ENSG00000244879 | ENSG00000092439 |
| ENSG00000259678 | ENSG00000092439 |
| ENSG00000259715 | ENSG00000092439 |
| ENSG00000251161 | ENSG00000092445 |
| ENSG00000174171 | ENSG00000092529 |
| ENSG00000258461 | ENSG00000092529 |
| ENSG00000227712 | ENSG00000092621 |

|                 |                 |
|-----------------|-----------------|
| ENSG00000231365 | ENSG00000092621 |
| ENSG00000218226 | ENSG00000092820 |
| ENSG00000271913 | ENSG00000092820 |
| ENSG00000237493 | ENSG00000092841 |
| ENSG00000258199 | ENSG00000092841 |
| ENSG00000116883 | ENSG00000092847 |
| ENSG00000163597 | ENSG00000092929 |
| ENSG00000267078 | ENSG00000092929 |
| ENSG00000267342 | ENSG00000092929 |
| ENSG00000267546 | ENSG00000092929 |
| ENSG00000163597 | ENSG00000092931 |
| ENSG00000234912 | ENSG00000092931 |
| ENSG00000161132 | ENSG00000093010 |
| ENSG00000227220 | ENSG00000093134 |
| ENSG00000227954 | ENSG00000093134 |
| ENSG00000227945 | ENSG00000093144 |
| ENSG00000230067 | ENSG00000093167 |
| ENSG00000229589 | ENSG00000093217 |
| ENSG00000235257 | ENSG00000093217 |
| ENSG00000249593 | ENSG00000094880 |
| ENSG00000248265 | ENSG00000094916 |
| ENSG00000258086 | ENSG00000094916 |
| ENSG00000237705 | ENSG00000095015 |
| ENSG00000267062 | ENSG00000095059 |
| ENSG00000267735 | ENSG00000095059 |
| ENSG00000268945 | ENSG00000095059 |
| ENSG00000267424 | ENSG00000095066 |
| ENSG00000255422 | ENSG00000095139 |
| ENSG00000228395 | ENSG00000095319 |
| ENSG00000204054 | ENSG00000095321 |
| ENSG00000228395 | ENSG00000095370 |
| ENSG00000257524 | ENSG00000095370 |
| ENSG00000226009 | ENSG00000095539 |
| ENSG00000226688 | ENSG00000095587 |
| ENSG00000260565 | ENSG00000095906 |
| ENSG00000237686 | ENSG00000096080 |
| ENSG00000220472 | ENSG00000096696 |
| ENSG00000268056 | ENSG00000096996 |
| ENSG00000273654 | ENSG00000096996 |
| ENSG00000267272 | ENSG00000097033 |
| ENSG00000223653 | ENSG00000097096 |
| ENSG00000240520 | ENSG00000097096 |
| ENSG00000282057 | ENSG00000097096 |
| ENSG00000266978 | ENSG00000099203 |
| ENSG00000267277 | ENSG00000099203 |
| ENSG00000229656 | ENSG00000099250 |
| ENSG00000259267 | ENSG00000099284 |
| ENSG00000235618 | ENSG00000099290 |

|                 |                 |
|-----------------|-----------------|
| ENSG00000269439 | ENSG00000099308 |
| ENSG00000213753 | ENSG00000099326 |
| ENSG00000232098 | ENSG00000099326 |
| ENSG00000267858 | ENSG00000099326 |
| ENSG00000269243 | ENSG00000099331 |
| ENSG00000183604 | ENSG00000099364 |
| ENSG00000235560 | ENSG00000099364 |
| ENSG00000260911 | ENSG00000099364 |
| ENSG00000183604 | ENSG00000099365 |
| ENSG00000183604 | ENSG00000099377 |
| ENSG00000235560 | ENSG00000099377 |
| ENSG00000260083 | ENSG00000099377 |
| ENSG00000261614 | ENSG00000099377 |
| ENSG00000262721 | ENSG00000099377 |
| ENSG00000183604 | ENSG00000099381 |
| ENSG00000239791 | ENSG00000099381 |
| ENSG00000183604 | ENSG00000099385 |
| ENSG00000250616 | ENSG00000099385 |
| ENSG00000260083 | ENSG00000099385 |
| ENSG00000261346 | ENSG00000099385 |
| ENSG00000261416 | ENSG00000099385 |
| ENSG00000262721 | ENSG00000099385 |
| ENSG00000266933 | ENSG00000099625 |
| ENSG00000269300 | ENSG00000099783 |
| ENSG00000171889 | ENSG00000099810 |
| ENSG00000247095 | ENSG00000099834 |
| ENSG00000251661 | ENSG00000099834 |
| ENSG00000255158 | ENSG00000099834 |
| ENSG00000255284 | ENSG00000099834 |
| ENSG00000269915 | ENSG00000099834 |
| ENSG00000230724 | ENSG00000099849 |
| ENSG00000247095 | ENSG00000099849 |
| ENSG00000255108 | ENSG00000099849 |
| ENSG00000255158 | ENSG00000099849 |
| ENSG00000267778 | ENSG00000099864 |
| ENSG00000236540 | ENSG00000099901 |
| ENSG00000274602 | ENSG00000099901 |
| ENSG00000243762 | ENSG00000099904 |
| ENSG00000243762 | ENSG00000099910 |
| ENSG00000183506 | ENSG00000099937 |
| ENSG00000229107 | ENSG00000099937 |
| ENSG00000237476 | ENSG00000099937 |
| ENSG00000230513 | ENSG00000099949 |
| ENSG00000237476 | ENSG00000099949 |
| ENSG00000178248 | ENSG00000099953 |
| ENSG00000178803 | ENSG00000099953 |
| ENSG00000215478 | ENSG00000099953 |
| ENSG00000272578 | ENSG00000099953 |

|                 |                 |
|-----------------|-----------------|
| ENSG00000273000 | ENSG00000099953 |
| ENSG00000273295 | ENSG00000099953 |
| ENSG00000133519 | ENSG00000099956 |
| ENSG00000230513 | ENSG00000099957 |
| ENSG00000183506 | ENSG00000099960 |
| ENSG00000226872 | ENSG00000099960 |
| ENSG00000229107 | ENSG00000099960 |
| ENSG00000230513 | ENSG00000099960 |
| ENSG00000128262 | ENSG00000099991 |
| ENSG00000230701 | ENSG00000099991 |
| ENSG00000273295 | ENSG00000099991 |
| ENSG00000218537 | ENSG00000099994 |
| ENSG00000225465 | ENSG00000099999 |
| ENSG00000228839 | ENSG00000099999 |
| ENSG00000128262 | ENSG00000100014 |
| ENSG00000178248 | ENSG00000100014 |
| ENSG00000178803 | ENSG00000100014 |
| ENSG00000215478 | ENSG00000100014 |
| ENSG00000272578 | ENSG00000100014 |
| ENSG00000273000 | ENSG00000100014 |
| ENSG00000280623 | ENSG00000100014 |
| ENSG00000230513 | ENSG00000100030 |
| ENSG00000236850 | ENSG00000100030 |
| ENSG00000272779 | ENSG00000100030 |
| ENSG00000237517 | ENSG00000100033 |
| ENSG00000224086 | ENSG00000100034 |
| ENSG00000237476 | ENSG00000100034 |
| ENSG00000224086 | ENSG00000100038 |
| ENSG00000237517 | ENSG00000100056 |
| ENSG00000235237 | ENSG00000100060 |
| ENSG00000279738 | ENSG00000100060 |
| ENSG00000233739 | ENSG00000100065 |
| ENSG00000244627 | ENSG00000100065 |
| ENSG00000279010 | ENSG00000100065 |
| ENSG00000279738 | ENSG00000100065 |
| ENSG00000100058 | ENSG00000100068 |
| ENSG00000230637 | ENSG00000100068 |
| ENSG00000272977 | ENSG00000100068 |
| ENSG00000128254 | ENSG00000100078 |
| ENSG00000244627 | ENSG00000100079 |
| ENSG00000279010 | ENSG00000100083 |
| ENSG00000233360 | ENSG00000100092 |
| ENSG00000128254 | ENSG00000100100 |
| ENSG00000231933 | ENSG00000100104 |
| ENSG00000244625 | ENSG00000100104 |
| ENSG00000214076 | ENSG00000100105 |
| ENSG00000228839 | ENSG00000100105 |
| ENSG00000244625 | ENSG00000100109 |

|                 |                 |
|-----------------|-----------------|
| ENSG00000261188 | ENSG00000100109 |
| ENSG00000183822 | ENSG00000100124 |
| ENSG00000233360 | ENSG00000100124 |
| ENSG00000244627 | ENSG00000100129 |
| ENSG00000279010 | ENSG00000100129 |
| ENSG00000279080 | ENSG00000100129 |
| ENSG00000233360 | ENSG00000100139 |
| ENSG00000235237 | ENSG00000100139 |
| ENSG00000279010 | ENSG00000100139 |
| ENSG00000279738 | ENSG00000100139 |
| ENSG00000184068 | ENSG00000100147 |
| ENSG00000230736 | ENSG00000100150 |
| ENSG00000233739 | ENSG00000100151 |
| ENSG00000235237 | ENSG00000100151 |
| ENSG00000249310 | ENSG00000100151 |
| ENSG00000279010 | ENSG00000100151 |
| ENSG00000225465 | ENSG00000100154 |
| ENSG00000235954 | ENSG00000100154 |
| ENSG00000230149 | ENSG00000100196 |
| ENSG00000244491 | ENSG00000100196 |
| ENSG00000244627 | ENSG00000100196 |
| ENSG00000227370 | ENSG00000100197 |
| ENSG00000232710 | ENSG00000100197 |
| ENSG00000237037 | ENSG00000100197 |
| ENSG00000270083 | ENSG00000100197 |
| ENSG00000281538 | ENSG00000100197 |
| ENSG00000225450 | ENSG00000100201 |
| ENSG00000230149 | ENSG00000100201 |
| ENSG00000244491 | ENSG00000100201 |
| ENSG00000244627 | ENSG00000100201 |
| ENSG00000225465 | ENSG00000100209 |
| ENSG00000226471 | ENSG00000100209 |
| ENSG00000235954 | ENSG00000100209 |
| ENSG00000230149 | ENSG00000100216 |
| ENSG00000244491 | ENSG00000100216 |
| ENSG00000244627 | ENSG00000100216 |
| ENSG00000225465 | ENSG00000100219 |
| ENSG00000226471 | ENSG00000100219 |
| ENSG00000235954 | ENSG00000100219 |
| ENSG00000230736 | ENSG00000100220 |
| ENSG00000230149 | ENSG00000100221 |
| ENSG00000230912 | ENSG00000100221 |
| ENSG00000244491 | ENSG00000100221 |
| ENSG00000244627 | ENSG00000100221 |
| ENSG00000244627 | ENSG00000100226 |
| ENSG00000279010 | ENSG00000100226 |
| ENSG00000279080 | ENSG00000100226 |
| ENSG00000184319 | ENSG00000100239 |

|                 |                 |
|-----------------|-----------------|
| ENSG00000273137 | ENSG00000100239 |
| ENSG00000279182 | ENSG00000100239 |
| ENSG00000184319 | ENSG00000100241 |
| ENSG00000213683 | ENSG00000100241 |
| ENSG00000233739 | ENSG00000100242 |
| ENSG00000244627 | ENSG00000100242 |
| ENSG00000249310 | ENSG00000100242 |
| ENSG00000225465 | ENSG00000100263 |
| ENSG00000227201 | ENSG00000100263 |
| ENSG00000226450 | ENSG00000100266 |
| ENSG00000274717 | ENSG00000100266 |
| ENSG00000225465 | ENSG00000100280 |
| ENSG00000234892 | ENSG00000100294 |
| ENSG00000172250 | ENSG00000100300 |
| ENSG00000274717 | ENSG00000100304 |
| ENSG00000225450 | ENSG00000100307 |
| ENSG00000244627 | ENSG00000100307 |
| ENSG00000244627 | ENSG00000100311 |
| ENSG00000225465 | ENSG00000100314 |
| ENSG00000272689 | ENSG00000100319 |
| ENSG00000249310 | ENSG00000100335 |
| ENSG00000272834 | ENSG00000100335 |
| ENSG00000183822 | ENSG00000100342 |
| ENSG00000235237 | ENSG00000100342 |
| ENSG00000235237 | ENSG00000100345 |
| ENSG00000183822 | ENSG00000100353 |
| ENSG00000235237 | ENSG00000100353 |
| ENSG00000229999 | ENSG00000100359 |
| ENSG00000197182 | ENSG00000100364 |
| ENSG00000183822 | ENSG00000100365 |
| ENSG00000233360 | ENSG00000100365 |
| ENSG00000235237 | ENSG00000100365 |
| ENSG00000183822 | ENSG00000100368 |
| ENSG00000235513 | ENSG00000100380 |
| ENSG00000229999 | ENSG00000100393 |
| ENSG00000235513 | ENSG00000100395 |
| ENSG00000235513 | ENSG00000100399 |
| ENSG00000237037 | ENSG00000100401 |
| ENSG00000184068 | ENSG00000100403 |
| ENSG00000237037 | ENSG00000100403 |
| ENSG00000184068 | ENSG00000100412 |
| ENSG00000237037 | ENSG00000100412 |
| ENSG00000197182 | ENSG00000100416 |
| ENSG00000277232 | ENSG00000100416 |
| ENSG00000280383 | ENSG00000100416 |
| ENSG00000184068 | ENSG00000100418 |
| ENSG00000237037 | ENSG00000100418 |
| ENSG00000270083 | ENSG00000100418 |

|                 |                 |
|-----------------|-----------------|
| ENSG00000197182 | ENSG00000100422 |
| ENSG00000184319 | ENSG00000100429 |
| ENSG00000272836 | ENSG00000100429 |
| ENSG00000273192 | ENSG00000100429 |
| ENSG00000157306 | ENSG00000100439 |
| ENSG00000251002 | ENSG00000100439 |
| ENSG00000258458 | ENSG00000100439 |
| ENSG00000275552 | ENSG00000100439 |
| ENSG00000215256 | ENSG00000100445 |
| ENSG00000157306 | ENSG00000100461 |
| ENSG00000258457 | ENSG00000100461 |
| ENSG00000157306 | ENSG00000100462 |
| ENSG00000251002 | ENSG00000100462 |
| ENSG00000258457 | ENSG00000100462 |
| ENSG00000258458 | ENSG00000100462 |
| ENSG00000214900 | ENSG00000100483 |
| ENSG00000214900 | ENSG00000100485 |
| ENSG00000214900 | ENSG00000100490 |
| ENSG00000214900 | ENSG00000100503 |
| ENSG00000214900 | ENSG00000100504 |
| ENSG00000237356 | ENSG00000100519 |
| ENSG00000237356 | ENSG00000100522 |
| ENSG00000237356 | ENSG00000100526 |
| ENSG00000237356 | ENSG00000100532 |
| ENSG00000258569 | ENSG00000100593 |
| ENSG00000246548 | ENSG00000100596 |
| ENSG00000258569 | ENSG00000100596 |
| ENSG00000232774 | ENSG00000100644 |
| ENSG00000259158 | ENSG00000100650 |
| ENSG00000227051 | ENSG00000100697 |
| ENSG00000235706 | ENSG00000100697 |
| ENSG00000234911 | ENSG00000100714 |
| ENSG00000258824 | ENSG00000100714 |
| ENSG00000258376 | ENSG00000100767 |
| ENSG00000259065 | ENSG00000100767 |
| ENSG00000259163 | ENSG00000100796 |
| ENSG00000157306 | ENSG00000100802 |
| ENSG00000251002 | ENSG00000100802 |
| ENSG00000258458 | ENSG00000100802 |
| ENSG00000215256 | ENSG00000100804 |
| ENSG00000214548 | ENSG00000100811 |
| ENSG00000258504 | ENSG00000100811 |
| ENSG00000258663 | ENSG00000100811 |
| ENSG00000258982 | ENSG00000100811 |
| ENSG00000259052 | ENSG00000100811 |
| ENSG00000258458 | ENSG00000100813 |
| ENSG00000251002 | ENSG00000100836 |
| ENSG00000258457 | ENSG00000100836 |



|                 |                 |
|-----------------|-----------------|
| ENSG00000258458 | ENSG00000100836 |
| ENSG00000157306 | ENSG00000100842 |
| ENSG00000215256 | ENSG00000100842 |
| ENSG00000251002 | ENSG00000100842 |
| ENSG00000258458 | ENSG00000100842 |
| ENSG00000258580 | ENSG00000100852 |
| ENSG00000157306 | ENSG00000100867 |
| ENSG00000215256 | ENSG00000100867 |
| ENSG00000157306 | ENSG00000100889 |
| ENSG00000215256 | ENSG00000100889 |
| ENSG00000260669 | ENSG00000100889 |
| ENSG00000258938 | ENSG00000100902 |
| ENSG00000157306 | ENSG00000100908 |
| ENSG00000215256 | ENSG00000100908 |
| ENSG00000259321 | ENSG00000100908 |
| ENSG00000157306 | ENSG00000100911 |
| ENSG00000215256 | ENSG00000100911 |
| ENSG00000260669 | ENSG00000100911 |
| ENSG00000215256 | ENSG00000100918 |
| ENSG00000157306 | ENSG00000100926 |
| ENSG00000278784 | ENSG00000100926 |
| ENSG00000215256 | ENSG00000100938 |
| ENSG00000157306 | ENSG00000100949 |
| ENSG00000215256 | ENSG00000100968 |
| ENSG00000258727 | ENSG00000100968 |
| ENSG00000088340 | ENSG00000100983 |
| ENSG00000204044 | ENSG00000100985 |
| ENSG00000088340 | ENSG00000100991 |
| ENSG00000213742 | ENSG00000100994 |
| ENSG00000088340 | ENSG00000101019 |
| ENSG00000244558 | ENSG00000101098 |
| ENSG00000244558 | ENSG00000101109 |
| ENSG00000203999 | ENSG00000101126 |
| ENSG00000233077 | ENSG00000101126 |
| ENSG00000232442 | ENSG00000101150 |
| ENSG00000268858 | ENSG00000101150 |
| ENSG00000124224 | ENSG00000101160 |
| ENSG00000124224 | ENSG00000101162 |
| ENSG00000229873 | ENSG00000101189 |
| ENSG00000229873 | ENSG00000101194 |
| ENSG00000232442 | ENSG00000101216 |
| ENSG00000234684 | ENSG00000101255 |
| ENSG00000225377 | ENSG00000101266 |
| ENSG00000234684 | ENSG00000101266 |
| ENSG00000225377 | ENSG00000101276 |
| ENSG00000149531 | ENSG00000101294 |
| ENSG00000234684 | ENSG00000101298 |
| ENSG00000088340 | ENSG00000101335 |

|                 |                 |
|-----------------|-----------------|
| ENSG00000232907 | ENSG00000101335 |
| ENSG00000198547 | ENSG00000101346 |
| ENSG00000235217 | ENSG00000101346 |
| ENSG00000232907 | ENSG00000101347 |
| ENSG00000198547 | ENSG00000101391 |
| ENSG00000230753 | ENSG00000101400 |
| ENSG00000275223 | ENSG00000101400 |
| ENSG00000272945 | ENSG00000101421 |
| ENSG00000224635 | ENSG00000101442 |
| ENSG00000269549 | ENSG00000101473 |
| ENSG00000274414 | ENSG00000101474 |
| ENSG00000263812 | ENSG00000101493 |
| ENSG00000265778 | ENSG00000101493 |
| ENSG00000266256 | ENSG00000101493 |
| ENSG00000261126 | ENSG00000101546 |
| ENSG00000267270 | ENSG00000101546 |
| ENSG00000266049 | ENSG00000101574 |
| ENSG00000264235 | ENSG00000101596 |
| ENSG00000266049 | ENSG00000101596 |
| ENSG00000266401 | ENSG00000101596 |
| ENSG00000266405 | ENSG00000101596 |
| ENSG00000264235 | ENSG00000101605 |
| ENSG00000265399 | ENSG00000101605 |
| ENSG00000266401 | ENSG00000101605 |
| ENSG00000263878 | ENSG00000101608 |
| ENSG00000264235 | ENSG00000101608 |
| ENSG00000265399 | ENSG00000101608 |
| ENSG00000272688 | ENSG00000101608 |
| ENSG00000270112 | ENSG00000101638 |
| ENSG00000264269 | ENSG00000101665 |
| ENSG00000265496 | ENSG00000101665 |
| ENSG00000205664 | ENSG00000101825 |
| ENSG00000236188 | ENSG00000101825 |
| ENSG00000233382 | ENSG00000101856 |
| ENSG00000258545 | ENSG00000101856 |
| ENSG00000226971 | ENSG00000101940 |
| ENSG00000214653 | ENSG00000101974 |
| ENSG00000232725 | ENSG00000101986 |
| ENSG00000226971 | ENSG00000101997 |
| ENSG00000226971 | ENSG00000102001 |
| ENSG00000271826 | ENSG00000102024 |
| ENSG00000232725 | ENSG00000102032 |
| ENSG00000232828 | ENSG00000102103 |
| ENSG00000232725 | ENSG00000102119 |
| ENSG00000197180 | ENSG00000102125 |
| ENSG00000232725 | ENSG00000102125 |
| ENSG00000280195 | ENSG00000102125 |
| ENSG00000197180 | ENSG00000102178 |

|                 |                 |
|-----------------|-----------------|
| ENSG00000232725 | ENSG00000102178 |
| ENSG00000235703 | ENSG00000102181 |
| ENSG00000245904 | ENSG00000102189 |
| ENSG00000257242 | ENSG00000102189 |
| ENSG00000235636 | ENSG00000102225 |
| ENSG00000237623 | ENSG00000102265 |
| ENSG00000226971 | ENSG00000102312 |
| ENSG00000235636 | ENSG00000102312 |
| ENSG00000204620 | ENSG00000102317 |
| ENSG00000226971 | ENSG00000102317 |
| ENSG00000227486 | ENSG00000102349 |
| ENSG00000168852 | ENSG00000102743 |
| ENSG00000215483 | ENSG00000102743 |
| ENSG00000233672 | ENSG00000102786 |
| ENSG00000236778 | ENSG00000102786 |
| ENSG00000281106 | ENSG00000102786 |
| ENSG00000231856 | ENSG00000102796 |
| ENSG00000233672 | ENSG00000102796 |
| ENSG00000243406 | ENSG00000102796 |
| ENSG00000281106 | ENSG00000102796 |
| ENSG00000224743 | ENSG00000102802 |
| ENSG00000170919 | ENSG00000102804 |
| ENSG00000227258 | ENSG00000102804 |
| ENSG00000183604 | ENSG00000102870 |
| ENSG00000261346 | ENSG00000102870 |
| ENSG00000246898 | ENSG00000102871 |
| ENSG00000270049 | ENSG00000102871 |
| ENSG00000246898 | ENSG00000102878 |
| ENSG00000270049 | ENSG00000102878 |
| ENSG00000183604 | ENSG00000102879 |
| ENSG00000198106 | ENSG00000102879 |
| ENSG00000205534 | ENSG00000102879 |
| ENSG00000198106 | ENSG00000102882 |
| ENSG00000205534 | ENSG00000102882 |
| ENSG00000232748 | ENSG00000102882 |
| ENSG00000260517 | ENSG00000102882 |
| ENSG00000277999 | ENSG00000102882 |
| ENSG00000198106 | ENSG00000102886 |
| ENSG00000205534 | ENSG00000102886 |
| ENSG00000260083 | ENSG00000102886 |
| ENSG00000260517 | ENSG00000102886 |
| ENSG00000262721 | ENSG00000102886 |
| ENSG00000277999 | ENSG00000102886 |
| ENSG00000270049 | ENSG00000102890 |
| ENSG00000180747 | ENSG00000102897 |
| ENSG00000189149 | ENSG00000102897 |
| ENSG00000248124 | ENSG00000102897 |
| ENSG00000260510 | ENSG00000102897 |

|                 |                 |
|-----------------|-----------------|
| ENSG00000270049 | ENSG00000102901 |
| ENSG00000263276 | ENSG00000102904 |
| ENSG00000196696 | ENSG00000102908 |
| ENSG00000261777 | ENSG00000102908 |
| ENSG00000260467 | ENSG00000102931 |
| ENSG00000260467 | ENSG00000102934 |
| ENSG00000259843 | ENSG00000102935 |
| ENSG00000260616 | ENSG00000102935 |
| ENSG00000263276 | ENSG00000102974 |
| ENSG00000260467 | ENSG00000102978 |
| ENSG00000260467 | ENSG00000102996 |
| ENSG00000276259 | ENSG00000102996 |
| ENSG00000196696 | ENSG00000103018 |
| ENSG00000196696 | ENSG00000103043 |
| ENSG00000260999 | ENSG00000103047 |
| ENSG00000196696 | ENSG00000103051 |
| ENSG00000263276 | ENSG00000103061 |
| ENSG00000270049 | ENSG00000103066 |
| ENSG00000261396 | ENSG00000103067 |
| ENSG00000270049 | ENSG00000103067 |
| ENSG00000261063 | ENSG00000103111 |
| ENSG00000259780 | ENSG00000103197 |
| ENSG00000259933 | ENSG00000103197 |
| ENSG00000261123 | ENSG00000103197 |
| ENSG00000236829 | ENSG00000103202 |
| ENSG00000250251 | ENSG00000103222 |
| ENSG00000260316 | ENSG00000103227 |
| ENSG00000260807 | ENSG00000103227 |
| ENSG00000276931 | ENSG00000103227 |
| ENSG00000261659 | ENSG00000103245 |
| ENSG00000236829 | ENSG00000103254 |
| ENSG00000260316 | ENSG00000103254 |
| ENSG00000261659 | ENSG00000103254 |
| ENSG00000261691 | ENSG00000103254 |
| ENSG00000182376 | ENSG00000103257 |
| ENSG00000260617 | ENSG00000103257 |
| ENSG00000261273 | ENSG00000103257 |
| ENSG00000261744 | ENSG00000103257 |
| ENSG00000269901 | ENSG00000103264 |
| ENSG00000270006 | ENSG00000103264 |
| ENSG00000236829 | ENSG00000103266 |
| ENSG00000261659 | ENSG00000103266 |
| ENSG00000182376 | ENSG00000103335 |
| ENSG00000224888 | ENSG00000103335 |
| ENSG00000260121 | ENSG00000103335 |
| ENSG00000260630 | ENSG00000103335 |
| ENSG00000261273 | ENSG00000103335 |
| ENSG00000263307 | ENSG00000103342 |

|                 |                 |
|-----------------|-----------------|
| ENSG00000260136 | ENSG00000103356 |
| ENSG00000259780 | ENSG00000103363 |
| ENSG00000262370 | ENSG00000103363 |
| ENSG00000267072 | ENSG00000103423 |
| ENSG00000103472 | ENSG00000103485 |
| ENSG00000198106 | ENSG00000103485 |
| ENSG00000260517 | ENSG00000103485 |
| ENSG00000260953 | ENSG00000103485 |
| ENSG00000230267 | ENSG00000103490 |
| ENSG00000261346 | ENSG00000103490 |
| ENSG00000103472 | ENSG00000103495 |
| ENSG00000198106 | ENSG00000103495 |
| ENSG00000238045 | ENSG00000103495 |
| ENSG00000250616 | ENSG00000103495 |
| ENSG00000260517 | ENSG00000103495 |
| ENSG00000260853 | ENSG00000103495 |
| ENSG00000260908 | ENSG00000103495 |
| ENSG00000261067 | ENSG00000103495 |
| ENSG00000261346 | ENSG00000103495 |
| ENSG00000260911 | ENSG00000103496 |
| ENSG00000261346 | ENSG00000103496 |
| ENSG00000103472 | ENSG00000103502 |
| ENSG00000198106 | ENSG00000103502 |
| ENSG00000238045 | ENSG00000103502 |
| ENSG00000260367 | ENSG00000103502 |
| ENSG00000260517 | ENSG00000103502 |
| ENSG00000260908 | ENSG00000103502 |
| ENSG00000261067 | ENSG00000103502 |
| ENSG00000261346 | ENSG00000103502 |
| ENSG00000261552 | ENSG00000103502 |
| ENSG00000260083 | ENSG00000103507 |
| ENSG00000260219 | ENSG00000103507 |
| ENSG00000260628 | ENSG00000103507 |
| ENSG00000261346 | ENSG00000103507 |
| ENSG00000262721 | ENSG00000103507 |
| ENSG00000278133 | ENSG00000103510 |
| ENSG00000250251 | ENSG00000103512 |
| ENSG00000260735 | ENSG00000103512 |
| ENSG00000262454 | ENSG00000103512 |
| ENSG00000277749 | ENSG00000103653 |
| ENSG00000259924 | ENSG00000103710 |
| ENSG00000259666 | ENSG00000103740 |
| ENSG00000260776 | ENSG00000103740 |
| ENSG00000259475 | ENSG00000103852 |
| ENSG00000260469 | ENSG00000103855 |
| ENSG00000259234 | ENSG00000103876 |
| ENSG00000259495 | ENSG00000103888 |
| ENSG00000174171 | ENSG00000103994 |

|                 |                 |
|-----------------|-----------------|
| ENSG00000206149 | ENSG00000104059 |
| ENSG00000259211 | ENSG00000104081 |
| ENSG00000259345 | ENSG00000104081 |
| ENSG00000259678 | ENSG00000104093 |
| ENSG00000259709 | ENSG00000104093 |
| ENSG00000259479 | ENSG00000104131 |
| ENSG00000259539 | ENSG00000104131 |
| ENSG00000259595 | ENSG00000104131 |
| ENSG00000179523 | ENSG00000104133 |
| ENSG00000205771 | ENSG00000104133 |
| ENSG00000259352 | ENSG00000104133 |
| ENSG00000259479 | ENSG00000104133 |
| ENSG00000259539 | ENSG00000104133 |
| ENSG00000247556 | ENSG00000104142 |
| ENSG00000248508 | ENSG00000104142 |
| ENSG00000259536 | ENSG00000104142 |
| ENSG00000259479 | ENSG00000104164 |
| ENSG00000259539 | ENSG00000104164 |
| ENSG00000259488 | ENSG00000104177 |
| ENSG00000249258 | ENSG00000104219 |
| ENSG00000253161 | ENSG00000104221 |
| ENSG00000253356 | ENSG00000104221 |
| ENSG00000253549 | ENSG00000104267 |
| ENSG00000251136 | ENSG00000104325 |
| ENSG00000253948 | ENSG00000104356 |
| ENSG00000253948 | ENSG00000104375 |
| ENSG00000259891 | ENSG00000104472 |
| ENSG00000254859 | ENSG00000104518 |
| ENSG00000247317 | ENSG00000104522 |
| ENSG00000247317 | ENSG00000104524 |
| ENSG00000253931 | ENSG00000104524 |
| ENSG00000255050 | ENSG00000104524 |
| ENSG00000177335 | ENSG00000104529 |
| ENSG00000247317 | ENSG00000104529 |
| ENSG00000254859 | ENSG00000104529 |
| ENSG00000254973 | ENSG00000104529 |
| ENSG00000246477 | ENSG00000104643 |
| ENSG00000248896 | ENSG00000104643 |
| ENSG00000251034 | ENSG00000104679 |
| ENSG00000253125 | ENSG00000104679 |
| ENSG00000253837 | ENSG00000104679 |
| ENSG00000246582 | ENSG00000104689 |
| ENSG00000250714 | ENSG00000104689 |
| ENSG00000253125 | ENSG00000104689 |
| ENSG00000260671 | ENSG00000104731 |
| ENSG00000235191 | ENSG00000104804 |
| ENSG00000268583 | ENSG00000104804 |
| ENSG00000267898 | ENSG00000104812 |

|                 |                 |
|-----------------|-----------------|
| ENSG00000269688 | ENSG00000104824 |
| ENSG00000269486 | ENSG00000104825 |
| ENSG00000266983 | ENSG00000104833 |
| ENSG00000266903 | ENSG00000104853 |
| ENSG00000267348 | ENSG00000104853 |
| ENSG00000186019 | ENSG00000104856 |
| ENSG00000266903 | ENSG00000104856 |
| ENSG00000267348 | ENSG00000104856 |
| ENSG00000269148 | ENSG00000104856 |
| ENSG00000186019 | ENSG00000104859 |
| ENSG00000266903 | ENSG00000104859 |
| ENSG00000267282 | ENSG00000104859 |
| ENSG00000267348 | ENSG00000104859 |
| ENSG00000266903 | ENSG00000104866 |
| ENSG00000267348 | ENSG00000104866 |
| ENSG00000267757 | ENSG00000104866 |
| ENSG00000232871 | ENSG00000104872 |
| ENSG00000243829 | ENSG00000104872 |
| ENSG00000269386 | ENSG00000104880 |
| ENSG00000214855 | ENSG00000104881 |
| ENSG00000266903 | ENSG00000104881 |
| ENSG00000267348 | ENSG00000104881 |
| ENSG00000269386 | ENSG00000104883 |
| ENSG00000267551 | ENSG00000104885 |
| ENSG00000232871 | ENSG00000104894 |
| ENSG00000268006 | ENSG00000104894 |
| ENSG00000280486 | ENSG00000104897 |
| ENSG00000267633 | ENSG00000104907 |
| ENSG00000267348 | ENSG00000104936 |
| ENSG00000267395 | ENSG00000104936 |
| ENSG00000268460 | ENSG00000104936 |
| ENSG00000131401 | ENSG00000104946 |
| ENSG00000268006 | ENSG00000104946 |
| ENSG00000180279 | ENSG00000104951 |
| ENSG00000235191 | ENSG00000104951 |
| ENSG00000267512 | ENSG00000104957 |
| ENSG00000235191 | ENSG00000104960 |
| ENSG00000268006 | ENSG00000104960 |
| ENSG00000267469 | ENSG00000104964 |
| ENSG00000275719 | ENSG00000104967 |
| ENSG00000267649 | ENSG00000104974 |
| ENSG00000269139 | ENSG00000104980 |
| ENSG00000161643 | ENSG00000105053 |
| ENSG00000268047 | ENSG00000105053 |
| ENSG00000267033 | ENSG00000105058 |
| ENSG00000267265 | ENSG00000105063 |
| ENSG00000267577 | ENSG00000105063 |
| ENSG00000266978 | ENSG00000105088 |

|                 |                 |
|-----------------|-----------------|
| ENSG00000267650 | ENSG00000105088 |
| ENSG00000268564 | ENSG00000105135 |
| ENSG00000248830 | ENSG00000105220 |
| ENSG00000256612 | ENSG00000105221 |
| ENSG00000237118 | ENSG00000105223 |
| ENSG00000130612 | ENSG00000105227 |
| ENSG00000256612 | ENSG00000105227 |
| ENSG00000130612 | ENSG00000105245 |
| ENSG00000256612 | ENSG00000105245 |
| ENSG00000205786 | ENSG00000105270 |
| ENSG00000267260 | ENSG00000105270 |
| ENSG00000267698 | ENSG00000105270 |
| ENSG00000268583 | ENSG00000105321 |
| ENSG00000268027 | ENSG00000105323 |
| ENSG00000270164 | ENSG00000105323 |
| ENSG00000267138 | ENSG00000105325 |
| ENSG00000267205 | ENSG00000105325 |
| ENSG00000267436 | ENSG00000105325 |
| ENSG00000256612 | ENSG00000105329 |
| ENSG00000268027 | ENSG00000105329 |
| ENSG00000239736 | ENSG00000105341 |
| ENSG00000267107 | ENSG00000105341 |
| ENSG00000232871 | ENSG00000105373 |
| ENSG00000267984 | ENSG00000105379 |
| ENSG00000269388 | ENSG00000105379 |
| ENSG00000182310 | ENSG00000105383 |
| ENSG00000269235 | ENSG00000105383 |
| ENSG00000269388 | ENSG00000105383 |
| ENSG00000269481 | ENSG00000105393 |
| ENSG00000266978 | ENSG00000105397 |
| ENSG00000232871 | ENSG00000105398 |
| ENSG00000267106 | ENSG00000105401 |
| ENSG00000267277 | ENSG00000105401 |
| ENSG00000266983 | ENSG00000105426 |
| ENSG00000269807 | ENSG00000105426 |
| ENSG00000267107 | ENSG00000105429 |
| ENSG00000270164 | ENSG00000105429 |
| ENSG00000268093 | ENSG00000105438 |
| ENSG00000232871 | ENSG00000105443 |
| ENSG00000268530 | ENSG00000105443 |
| ENSG00000232871 | ENSG00000105447 |
| ENSG00000268530 | ENSG00000105447 |
| ENSG00000180279 | ENSG00000105472 |
| ENSG00000182310 | ENSG00000105472 |
| ENSG00000269959 | ENSG00000105472 |
| ENSG00000268001 | ENSG00000105483 |
| ENSG00000268583 | ENSG00000105483 |
| ENSG00000269102 | ENSG00000105497 |



|                 |                 |
|-----------------|-----------------|
| ENSG00000235191 | ENSG00000105516 |
| ENSG00000268583 | ENSG00000105516 |
| ENSG00000266983 | ENSG00000105519 |
| ENSG00000267571 | ENSG00000105519 |
| ENSG00000232871 | ENSG00000105538 |
| ENSG00000235191 | ENSG00000105559 |
| ENSG00000213801 | ENSG00000105568 |
| ENSG00000268015 | ENSG00000105568 |
| ENSG00000269102 | ENSG00000105568 |
| ENSG00000226696 | ENSG00000105609 |
| ENSG00000227407 | ENSG00000105609 |
| ENSG00000228323 | ENSG00000105609 |
| ENSG00000267265 | ENSG00000105609 |
| ENSG00000267577 | ENSG00000105609 |
| ENSG00000267735 | ENSG00000105612 |
| ENSG00000268945 | ENSG00000105612 |
| ENSG00000237017 | ENSG00000105619 |
| ENSG00000269439 | ENSG00000105642 |
| ENSG00000268056 | ENSG00000105643 |
| ENSG00000269439 | ENSG00000105643 |
| ENSG00000269815 | ENSG00000105643 |
| ENSG00000273654 | ENSG00000105643 |
| ENSG00000269439 | ENSG00000105650 |
| ENSG00000269439 | ENSG00000105655 |
| ENSG00000268030 | ENSG00000105656 |
| ENSG00000269019 | ENSG00000105662 |
| ENSG00000273654 | ENSG00000105662 |
| ENSG00000266904 | ENSG00000105671 |
| ENSG00000267419 | ENSG00000105671 |
| ENSG00000275540 | ENSG00000105671 |
| ENSG00000266904 | ENSG00000105676 |
| ENSG00000267565 | ENSG00000105676 |
| ENSG00000275540 | ENSG00000105676 |
| ENSG00000269553 | ENSG00000105679 |
| ENSG00000205786 | ENSG00000105699 |
| ENSG00000262497 | ENSG00000105699 |
| ENSG00000268030 | ENSG00000105700 |
| ENSG00000269191 | ENSG00000105701 |
| ENSG00000267419 | ENSG00000105705 |
| ENSG00000275540 | ENSG00000105705 |
| ENSG00000271032 | ENSG00000105707 |
| ENSG00000205786 | ENSG00000105711 |
| ENSG00000271032 | ENSG00000105711 |
| ENSG00000271366 | ENSG00000105711 |
| ENSG00000213904 | ENSG00000105722 |
| ENSG00000267107 | ENSG00000105722 |
| ENSG00000213904 | ENSG00000105723 |
| ENSG00000231561 | ENSG00000105723 |

|                 |                 |
|-----------------|-----------------|
| ENSG00000267107 | ENSG00000105723 |
| ENSG00000268027 | ENSG00000105723 |
| ENSG00000231205 | ENSG00000105726 |
| ENSG00000213904 | ENSG00000105737 |
| ENSG00000231561 | ENSG00000105737 |
| ENSG00000239736 | ENSG00000105737 |
| ENSG00000266903 | ENSG00000105771 |
| ENSG00000205763 | ENSG00000105778 |
| ENSG00000229358 | ENSG00000105778 |
| ENSG00000170629 | ENSG00000105808 |
| ENSG00000170629 | ENSG00000105819 |
| ENSG00000236861 | ENSG00000105829 |
| ENSG00000243193 | ENSG00000105835 |
| ENSG00000223500 | ENSG00000105875 |
| ENSG00000231794 | ENSG00000105875 |
| ENSG00000231764 | ENSG00000105880 |
| ENSG00000226329 | ENSG00000105889 |
| ENSG00000214783 | ENSG00000105953 |
| ENSG00000273432 | ENSG00000105953 |
| ENSG00000214188 | ENSG00000105967 |
| ENSG00000226367 | ENSG00000105967 |
| ENSG00000243243 | ENSG00000105967 |
| ENSG00000214765 | ENSG00000105968 |
| ENSG00000272556 | ENSG00000105968 |
| ENSG00000214188 | ENSG00000105971 |
| ENSG00000226367 | ENSG00000105971 |
| ENSG00000243243 | ENSG00000105971 |
| ENSG00000226367 | ENSG00000105974 |
| ENSG00000243243 | ENSG00000105974 |
| ENSG00000243243 | ENSG00000105976 |
| ENSG00000224903 | ENSG00000105982 |
| ENSG00000233038 | ENSG00000105983 |
| ENSG00000230487 | ENSG00000106003 |
| ENSG00000230487 | ENSG00000106009 |
| ENSG00000236708 | ENSG00000106009 |
| ENSG00000228204 | ENSG00000106070 |
| ENSG00000225264 | ENSG00000106080 |
| ENSG00000227014 | ENSG00000106080 |
| ENSG00000196295 | ENSG00000106086 |
| ENSG00000225264 | ENSG00000106086 |
| ENSG00000227014 | ENSG00000106086 |
| ENSG00000232415 | ENSG00000106089 |
| ENSG00000232729 | ENSG00000106089 |
| ENSG00000229153 | ENSG00000106123 |
| ENSG00000231840 | ENSG00000106123 |
| ENSG00000253882 | ENSG00000106123 |
| ENSG00000281404 | ENSG00000106125 |
| ENSG00000229153 | ENSG00000106144 |

|                 |                 |
|-----------------|-----------------|
| ENSG00000231840 | ENSG00000106144 |
| ENSG00000244198 | ENSG00000106144 |
| ENSG00000253882 | ENSG00000106144 |
| ENSG00000078319 | ENSG00000106244 |
| ENSG00000242294 | ENSG00000106244 |
| ENSG00000244219 | ENSG00000106244 |
| ENSG00000272752 | ENSG00000106244 |
| ENSG00000078319 | ENSG00000106258 |
| ENSG00000224729 | ENSG00000106258 |
| ENSG00000242294 | ENSG00000106258 |
| ENSG00000272752 | ENSG00000106258 |
| ENSG00000242798 | ENSG00000106261 |
| ENSG00000272752 | ENSG00000106261 |
| ENSG00000274272 | ENSG00000106261 |
| ENSG00000236708 | ENSG00000106266 |
| ENSG00000273230 | ENSG00000106266 |
| ENSG00000224729 | ENSG00000106333 |
| ENSG00000242798 | ENSG00000106333 |
| ENSG00000244219 | ENSG00000106333 |
| ENSG00000274272 | ENSG00000106333 |
| ENSG00000280828 | ENSG00000106344 |
| ENSG00000187953 | ENSG00000106346 |
| ENSG00000240758 | ENSG00000106348 |
| ENSG00000242588 | ENSG00000106348 |
| ENSG00000280828 | ENSG00000106348 |
| ENSG00000281490 | ENSG00000106348 |
| ENSG00000240211 | ENSG00000106351 |
| ENSG00000244219 | ENSG00000106351 |
| ENSG00000274272 | ENSG00000106351 |
| ENSG00000078319 | ENSG00000106397 |
| ENSG00000242294 | ENSG00000106397 |
| ENSG00000272752 | ENSG00000106397 |
| ENSG00000230626 | ENSG00000106459 |
| ENSG00000242902 | ENSG00000106459 |
| ENSG00000273329 | ENSG00000106459 |
| ENSG00000204934 | ENSG00000106479 |
| ENSG00000235837 | ENSG00000106524 |
| ENSG00000237773 | ENSG00000106524 |
| ENSG00000235837 | ENSG00000106546 |
| ENSG00000224116 | ENSG00000106571 |
| ENSG00000214783 | ENSG00000106605 |
| ENSG00000228903 | ENSG00000106605 |
| ENSG00000273432 | ENSG00000106605 |
| ENSG00000214783 | ENSG00000106608 |
| ENSG00000272655 | ENSG00000106608 |
| ENSG00000273432 | ENSG00000106608 |
| ENSG00000214783 | ENSG00000106624 |
| ENSG00000228903 | ENSG00000106624 |

|                 |                 |
|-----------------|-----------------|
| ENSG00000273432 | ENSG00000106624 |
| ENSG00000214544 | ENSG00000106635 |
| ENSG00000274080 | ENSG00000106635 |
| ENSG00000214544 | ENSG00000106638 |
| ENSG00000232729 | ENSG00000106665 |
| ENSG00000205578 | ENSG00000106682 |
| ENSG00000214544 | ENSG00000106682 |
| ENSG00000214544 | ENSG00000106683 |
| ENSG00000232104 | ENSG00000106688 |
| ENSG00000226334 | ENSG00000106692 |
| ENSG00000237461 | ENSG00000106799 |
| ENSG00000187984 | ENSG00000106823 |
| ENSG00000259953 | ENSG00000106868 |
| ENSG00000204054 | ENSG00000107021 |
| ENSG00000204055 | ENSG00000107021 |
| ENSG00000257524 | ENSG00000107021 |
| ENSG00000228739 | ENSG00000107077 |
| ENSG00000204054 | ENSG00000107130 |
| ENSG00000227388 | ENSG00000107140 |
| ENSG00000230074 | ENSG00000107140 |
| ENSG00000225361 | ENSG00000107147 |
| ENSG00000235448 | ENSG00000107165 |
| ENSG00000227388 | ENSG00000107185 |
| ENSG00000235448 | ENSG00000107186 |
| ENSG00000226562 | ENSG00000107262 |
| ENSG00000228352 | ENSG00000107262 |
| ENSG00000236986 | ENSG00000107263 |
| ENSG00000204706 | ENSG00000107282 |
| ENSG00000275549 | ENSG00000107317 |
| ENSG00000180539 | ENSG00000107331 |
| ENSG00000260190 | ENSG00000107331 |
| ENSG00000225434 | ENSG00000107372 |
| ENSG00000177757 | ENSG00000107404 |
| ENSG00000217801 | ENSG00000107404 |
| ENSG00000224870 | ENSG00000107404 |
| ENSG00000268575 | ENSG00000107404 |
| ENSG00000239665 | ENSG00000107537 |
| ENSG00000224812 | ENSG00000107551 |
| ENSG00000237840 | ENSG00000107551 |
| ENSG00000227695 | ENSG00000107554 |
| ENSG00000177640 | ENSG00000107560 |
| ENSG00000258114 | ENSG00000107560 |
| ENSG00000224812 | ENSG00000107562 |
| ENSG00000237512 | ENSG00000107731 |
| ENSG00000237512 | ENSG00000107736 |
| ENSG00000259267 | ENSG00000107736 |
| ENSG00000259267 | ENSG00000107738 |
| ENSG00000236756 | ENSG00000107745 |

|                 |                 |
|-----------------|-----------------|
| ENSG00000236756 | ENSG00000107758 |
| ENSG00000237768 | ENSG00000107758 |
| ENSG00000271848 | ENSG00000107758 |
| ENSG00000196566 | ENSG00000107789 |
| ENSG00000223482 | ENSG00000107789 |
| ENSG00000225913 | ENSG00000107789 |
| ENSG00000227896 | ENSG00000107789 |
| ENSG00000180139 | ENSG00000107796 |
| ENSG00000232229 | ENSG00000107796 |
| ENSG00000232229 | ENSG00000107798 |
| ENSG00000226009 | ENSG00000107874 |
| ENSG00000233334 | ENSG00000107902 |
| ENSG00000273599 | ENSG00000107902 |
| ENSG00000232656 | ENSG00000107929 |
| ENSG00000232656 | ENSG00000107937 |
| ENSG00000260461 | ENSG00000107960 |
| ENSG00000224597 | ENSG00000107968 |
| ENSG00000259994 | ENSG00000107968 |
| ENSG00000228651 | ENSG00000107984 |
| ENSG00000273312 | ENSG00000108100 |
| ENSG00000224596 | ENSG00000108175 |
| ENSG00000225484 | ENSG00000108175 |
| ENSG00000244733 | ENSG00000108175 |
| ENSG00000224596 | ENSG00000108179 |
| ENSG00000225484 | ENSG00000108179 |
| ENSG00000230091 | ENSG00000108179 |
| ENSG00000235426 | ENSG00000108179 |
| ENSG00000242600 | ENSG00000108179 |
| ENSG00000244733 | ENSG00000108179 |
| ENSG00000225484 | ENSG00000108219 |
| ENSG00000264031 | ENSG00000108256 |
| ENSG00000264290 | ENSG00000108256 |
| ENSG00000264808 | ENSG00000108256 |
| ENSG00000265845 | ENSG00000108256 |
| ENSG00000227543 | ENSG00000108262 |
| ENSG00000264031 | ENSG00000108262 |
| ENSG00000264808 | ENSG00000108262 |
| ENSG00000188825 | ENSG00000108312 |
| ENSG00000224505 | ENSG00000108312 |
| ENSG00000267002 | ENSG00000108312 |
| ENSG00000267080 | ENSG00000108312 |
| ENSG00000267121 | ENSG00000108312 |
| ENSG00000267340 | ENSG00000108312 |
| ENSG00000267394 | ENSG00000108312 |
| ENSG00000215769 | ENSG00000108370 |
| ENSG00000265148 | ENSG00000108375 |
| ENSG00000265542 | ENSG00000108375 |
| ENSG00000213326 | ENSG00000108379 |

|                 |                 |
|-----------------|-----------------|
| ENSG00000262879 | ENSG00000108379 |
| ENSG00000265148 | ENSG00000108387 |
| ENSG00000265542 | ENSG00000108387 |
| ENSG00000265148 | ENSG00000108389 |
| ENSG00000265542 | ENSG00000108389 |
| ENSG00000240898 | ENSG00000108405 |
| ENSG00000266002 | ENSG00000108406 |
| ENSG00000267095 | ENSG00000108406 |
| ENSG00000228782 | ENSG00000108424 |
| ENSG00000262879 | ENSG00000108424 |
| ENSG00000263142 | ENSG00000108424 |
| ENSG00000263412 | ENSG00000108424 |
| ENSG00000264019 | ENSG00000108424 |
| ENSG00000264920 | ENSG00000108424 |
| ENSG00000262879 | ENSG00000108433 |
| ENSG00000263142 | ENSG00000108433 |
| ENSG00000228782 | ENSG00000108439 |
| ENSG00000234494 | ENSG00000108439 |
| ENSG00000263412 | ENSG00000108439 |
| ENSG00000264019 | ENSG00000108439 |
| ENSG00000266601 | ENSG00000108439 |
| ENSG00000259349 | ENSG00000108443 |
| ENSG00000231625 | ENSG00000108448 |
| ENSG00000240445 | ENSG00000108448 |
| ENSG00000273018 | ENSG00000108448 |
| ENSG00000264701 | ENSG00000108465 |
| ENSG00000266036 | ENSG00000108469 |
| ENSG00000267546 | ENSG00000108479 |
| ENSG00000266066 | ENSG00000108506 |
| ENSG00000235085 | ENSG00000108509 |
| ENSG00000261879 | ENSG00000108515 |
| ENSG00000261879 | ENSG00000108518 |
| ENSG00000263164 | ENSG00000108518 |
| ENSG00000263219 | ENSG00000108518 |
| ENSG00000261879 | ENSG00000108523 |
| ENSG00000235085 | ENSG00000108528 |
| ENSG00000188933 | ENSG00000108551 |
| ENSG00000154874 | ENSG00000108557 |
| ENSG00000273018 | ENSG00000108557 |
| ENSG00000263272 | ENSG00000108561 |
| ENSG00000214719 | ENSG00000108578 |
| ENSG00000248121 | ENSG00000108578 |
| ENSG00000263657 | ENSG00000108578 |
| ENSG00000264031 | ENSG00000108578 |
| ENSG00000264538 | ENSG00000108578 |
| ENSG00000214719 | ENSG00000108582 |
| ENSG00000264031 | ENSG00000108582 |
| ENSG00000264538 | ENSG00000108582 |

|                 |                 |
|-----------------|-----------------|
| ENSG00000214719 | ENSG00000108587 |
| ENSG00000264031 | ENSG00000108587 |
| ENSG00000264538 | ENSG00000108587 |
| ENSG00000266865 | ENSG00000108587 |
| ENSG00000233635 | ENSG00000108588 |
| ENSG00000215067 | ENSG00000108590 |
| ENSG00000256806 | ENSG00000108590 |
| ENSG00000227685 | ENSG00000108599 |
| ENSG00000228983 | ENSG00000108599 |
| ENSG00000233098 | ENSG00000108599 |
| ENSG00000262769 | ENSG00000108599 |
| ENSG00000214176 | ENSG00000108604 |
| ENSG00000233635 | ENSG00000108604 |
| ENSG00000215769 | ENSG00000108654 |
| ENSG00000266970 | ENSG00000108669 |
| ENSG00000266970 | ENSG00000108679 |
| ENSG00000267765 | ENSG00000108773 |
| ENSG00000260105 | ENSG00000108774 |
| ENSG00000266962 | ENSG00000108786 |
| ENSG00000267042 | ENSG00000108786 |
| ENSG00000267765 | ENSG00000108786 |
| ENSG00000236383 | ENSG00000108797 |
| ENSG00000267765 | ENSG00000108797 |
| ENSG00000267002 | ENSG00000108799 |
| ENSG00000229980 | ENSG00000108819 |
| ENSG00000236472 | ENSG00000108819 |
| ENSG00000249176 | ENSG00000108819 |
| ENSG00000204584 | ENSG00000108821 |
| ENSG00000229980 | ENSG00000108826 |
| ENSG00000250286 | ENSG00000108826 |
| ENSG00000188825 | ENSG00000108828 |
| ENSG00000197291 | ENSG00000108828 |
| ENSG00000213373 | ENSG00000108828 |
| ENSG00000236383 | ENSG00000108828 |
| ENSG00000229980 | ENSG00000108829 |
| ENSG00000188825 | ENSG00000108830 |
| ENSG00000267002 | ENSG00000108830 |
| ENSG00000215067 | ENSG00000108839 |
| ENSG00000264772 | ENSG00000108839 |
| ENSG00000267394 | ENSG00000108840 |
| ENSG00000251239 | ENSG00000108846 |
| ENSG00000236383 | ENSG00000108861 |
| ENSG00000267121 | ENSG00000108883 |
| ENSG00000267278 | ENSG00000108883 |
| ENSG00000231749 | ENSG00000108932 |
| ENSG00000237854 | ENSG00000108932 |
| ENSG00000231749 | ENSG00000108946 |
| ENSG00000215067 | ENSG00000108947 |

|                 |                 |
|-----------------|-----------------|
| ENSG00000231749 | ENSG00000108950 |
| ENSG00000267023 | ENSG00000108950 |
| ENSG00000267731 | ENSG00000108950 |
| ENSG00000227685 | ENSG00000109016 |
| ENSG00000233098 | ENSG00000109016 |
| ENSG00000239223 | ENSG00000109046 |
| ENSG00000264486 | ENSG00000109046 |
| ENSG00000265683 | ENSG00000109046 |
| ENSG00000266036 | ENSG00000109065 |
| ENSG00000265168 | ENSG00000109079 |
| ENSG00000227543 | ENSG00000109103 |
| ENSG00000264808 | ENSG00000109103 |
| ENSG00000265254 | ENSG00000109103 |
| ENSG00000266527 | ENSG00000109103 |
| ENSG00000227543 | ENSG00000109107 |
| ENSG00000264031 | ENSG00000109107 |
| ENSG00000264808 | ENSG00000109107 |
| ENSG00000265168 | ENSG00000109107 |
| ENSG00000264031 | ENSG00000109111 |
| ENSG00000264486 | ENSG00000109111 |
| ENSG00000266642 | ENSG00000109111 |
| ENSG00000227543 | ENSG00000109113 |
| ENSG00000264031 | ENSG00000109113 |
| ENSG00000264304 | ENSG00000109113 |
| ENSG00000267259 | ENSG00000109113 |
| ENSG00000260777 | ENSG00000109118 |
| ENSG00000264031 | ENSG00000109118 |
| ENSG00000265845 | ENSG00000109118 |
| ENSG00000226950 | ENSG00000109184 |
| ENSG00000248115 | ENSG00000109189 |
| ENSG00000249341 | ENSG00000109220 |
| ENSG00000248161 | ENSG00000109320 |
| ENSG00000248161 | ENSG00000109323 |
| ENSG00000251596 | ENSG00000109472 |
| ENSG00000245293 | ENSG00000109475 |
| ENSG00000247950 | ENSG00000109534 |
| ENSG00000249955 | ENSG00000109572 |
| ENSG00000237125 | ENSG00000109586 |
| ENSG00000245213 | ENSG00000109586 |
| ENSG00000248174 | ENSG00000109586 |
| ENSG00000249767 | ENSG00000109667 |
| ENSG00000261490 | ENSG00000109667 |
| ENSG00000249673 | ENSG00000109758 |
| ENSG00000231160 | ENSG00000109787 |
| ENSG00000249207 | ENSG00000109790 |
| ENSG00000205794 | ENSG00000109814 |
| ENSG00000231160 | ENSG00000109814 |
| ENSG00000249348 | ENSG00000109814 |



|                 |                 |
|-----------------|-----------------|
| ENSG00000255197 | ENSG00000109919 |
| ENSG00000255248 | ENSG00000109929 |
| ENSG00000245498 | ENSG00000110013 |
| ENSG00000229719 | ENSG00000110025 |
| ENSG00000245532 | ENSG00000110046 |
| ENSG00000255478 | ENSG00000110046 |
| ENSG00000251562 | ENSG00000110047 |
| ENSG00000160172 | ENSG00000110057 |
| ENSG00000255306 | ENSG00000110057 |
| ENSG00000255062 | ENSG00000110074 |
| ENSG00000254607 | ENSG00000110080 |
| ENSG00000257271 | ENSG00000110080 |
| ENSG00000280832 | ENSG00000110080 |
| ENSG00000254604 | ENSG00000110092 |
| ENSG00000243742 | ENSG00000110104 |
| ENSG00000256813 | ENSG00000110104 |
| ENSG00000243742 | ENSG00000110107 |
| ENSG00000256813 | ENSG00000110107 |
| ENSG00000255929 | ENSG00000110218 |
| ENSG00000256469 | ENSG00000110218 |
| ENSG00000254851 | ENSG00000110274 |
| ENSG00000246273 | ENSG00000110315 |
| ENSG00000246308 | ENSG00000110315 |
| ENSG00000247271 | ENSG00000110315 |
| ENSG00000255125 | ENSG00000110315 |
| ENSG00000254528 | ENSG00000110324 |
| ENSG00000255422 | ENSG00000110324 |
| ENSG00000278768 | ENSG00000110324 |
| ENSG00000255422 | ENSG00000110367 |
| ENSG00000278376 | ENSG00000110367 |
| ENSG00000255422 | ENSG00000110375 |
| ENSG00000255422 | ENSG00000110400 |
| ENSG00000254708 | ENSG00000110429 |
| ENSG00000124915 | ENSG00000110446 |
| ENSG00000243742 | ENSG00000110446 |
| ENSG00000254639 | ENSG00000110497 |
| ENSG00000255197 | ENSG00000110514 |
| ENSG00000238184 | ENSG00000110651 |
| ENSG00000269821 | ENSG00000110651 |
| ENSG00000226416 | ENSG00000110665 |
| ENSG00000238184 | ENSG00000110665 |
| ENSG00000184669 | ENSG00000110696 |
| ENSG00000160172 | ENSG00000110717 |
| ENSG00000255306 | ENSG00000110717 |
| ENSG00000160172 | ENSG00000110721 |
| ENSG00000255306 | ENSG00000110721 |
| ENSG00000215039 | ENSG00000110799 |
| ENSG00000256377 | ENSG00000110841 |

|                 |                 |
|-----------------|-----------------|
| ENSG00000257378 | ENSG00000110844 |
| ENSG00000257588 | ENSG00000110844 |
| ENSG00000258017 | ENSG00000110844 |
| ENSG00000258057 | ENSG00000110844 |
| ENSG00000272368 | ENSG00000110844 |
| ENSG00000111788 | ENSG00000110852 |
| ENSG00000214776 | ENSG00000110852 |
| ENSG00000245648 | ENSG00000110852 |
| ENSG00000256673 | ENSG00000110852 |
| ENSG00000256888 | ENSG00000110852 |
| ENSG00000257221 | ENSG00000110876 |
| ENSG00000256139 | ENSG00000110880 |
| ENSG00000258017 | ENSG00000110881 |
| ENSG00000258101 | ENSG00000110881 |
| ENSG00000272368 | ENSG00000110881 |
| ENSG00000226472 | ENSG00000110900 |
| ENSG00000255867 | ENSG00000110900 |
| ENSG00000272368 | ENSG00000110911 |
| ENSG00000255650 | ENSG00000110921 |
| ENSG00000272368 | ENSG00000110925 |
| ENSG00000224713 | ENSG00000110955 |
| ENSG00000257337 | ENSG00000111057 |
| ENSG00000257467 | ENSG00000111058 |
| ENSG00000257337 | ENSG00000111077 |
| ENSG00000224713 | ENSG00000111087 |
| ENSG00000177406 | ENSG00000111181 |
| ENSG00000226210 | ENSG00000111181 |
| ENSG00000249695 | ENSG00000111181 |
| ENSG00000256667 | ENSG00000111196 |
| ENSG00000250899 | ENSG00000111203 |
| ENSG00000256712 | ENSG00000111215 |
| ENSG00000255650 | ENSG00000111229 |
| ENSG00000258210 | ENSG00000111229 |
| ENSG00000258210 | ENSG00000111237 |
| ENSG00000234608 | ENSG00000111271 |
| ENSG00000258099 | ENSG00000111271 |
| ENSG00000240370 | ENSG00000111319 |
| ENSG00000256433 | ENSG00000111321 |
| ENSG00000235423 | ENSG00000111325 |
| ENSG00000256249 | ENSG00000111325 |
| ENSG00000235423 | ENSG00000111328 |
| ENSG00000249550 | ENSG00000111331 |
| ENSG00000249550 | ENSG00000111335 |
| ENSG00000257286 | ENSG00000111335 |
| ENSG00000249550 | ENSG00000111344 |
| ENSG00000257261 | ENSG00000111371 |
| ENSG00000257735 | ENSG00000111424 |
| ENSG00000248265 | ENSG00000111481 |

|                 |                 |
|-----------------|-----------------|
| ENSG00000250742 | ENSG00000111481 |
| ENSG00000258086 | ENSG00000111481 |
| ENSG00000179899 | ENSG00000111540 |
| ENSG00000237493 | ENSG00000111540 |
| ENSG00000215039 | ENSG00000111639 |
| ENSG00000256967 | ENSG00000111640 |
| ENSG00000256433 | ENSG00000111641 |
| ENSG00000256967 | ENSG00000111641 |
| ENSG00000215039 | ENSG00000111644 |
| ENSG00000205885 | ENSG00000111652 |
| ENSG00000256433 | ENSG00000111652 |
| ENSG00000215039 | ENSG00000111653 |
| ENSG00000256967 | ENSG00000111667 |
| ENSG00000269892 | ENSG00000111667 |
| ENSG00000240370 | ENSG00000111669 |
| ENSG00000281344 | ENSG00000111670 |
| ENSG00000240370 | ENSG00000111671 |
| ENSG00000248593 | ENSG00000111671 |
| ENSG00000240370 | ENSG00000111674 |
| ENSG00000275703 | ENSG00000111674 |
| ENSG00000240370 | ENSG00000111676 |
| ENSG00000248593 | ENSG00000111676 |
| ENSG00000275703 | ENSG00000111676 |
| ENSG00000215039 | ENSG00000111684 |
| ENSG00000240370 | ENSG00000111684 |
| ENSG00000257681 | ENSG00000111696 |
| ENSG00000277283 | ENSG00000111737 |
| ENSG00000226711 | ENSG00000111752 |
| ENSG00000237248 | ENSG00000111752 |
| ENSG00000256069 | ENSG00000111752 |
| ENSG00000245311 | ENSG00000111790 |
| ENSG00000246695 | ENSG00000111790 |
| ENSG00000255750 | ENSG00000111790 |
| ENSG00000255968 | ENSG00000111790 |
| ENSG00000256234 | ENSG00000111790 |
| ENSG00000272558 | ENSG00000111801 |
| ENSG00000247925 | ENSG00000111859 |
| ENSG00000236548 | ENSG00000111912 |
| ENSG00000227627 | ENSG00000112031 |
| ENSG00000232909 | ENSG00000112062 |
| ENSG00000246982 | ENSG00000112062 |
| ENSG00000230845 | ENSG00000112144 |
| ENSG00000231683 | ENSG00000112144 |
| ENSG00000231683 | ENSG00000112146 |
| ENSG00000226803 | ENSG00000112200 |
| ENSG00000226803 | ENSG00000112208 |
| ENSG00000231441 | ENSG00000112210 |
| ENSG00000224384 | ENSG00000112218 |

|                 |                 |
|-----------------|-----------------|
| ENSG00000228439 | ENSG00000112234 |
| ENSG00000227803 | ENSG00000112242 |
| ENSG00000227220 | ENSG00000112282 |
| ENSG00000227954 | ENSG00000112299 |
| ENSG00000234484 | ENSG00000112303 |
| ENSG00000232295 | ENSG00000112305 |
| ENSG00000233237 | ENSG00000112305 |
| ENSG00000168405 | ENSG00000112308 |
| ENSG00000232295 | ENSG00000112309 |
| ENSG00000227954 | ENSG00000112319 |
| ENSG00000237596 | ENSG00000112339 |
| ENSG00000168405 | ENSG00000112343 |
| ENSG00000272053 | ENSG00000112343 |
| ENSG00000237499 | ENSG00000112378 |
| ENSG00000235652 | ENSG00000112425 |
| ENSG00000204188 | ENSG00000112473 |
| ENSG00000229391 | ENSG00000112473 |
| ENSG00000204188 | ENSG00000112511 |
| ENSG00000225339 | ENSG00000112511 |
| ENSG00000204188 | ENSG00000112514 |
| ENSG00000225339 | ENSG00000112514 |
| ENSG00000261068 | ENSG00000112578 |
| ENSG00000261003 | ENSG00000112584 |
| ENSG00000245261 | ENSG00000112624 |
| ENSG00000231113 | ENSG00000112640 |
| ENSG00000237686 | ENSG00000112655 |
| ENSG00000261068 | ENSG00000112655 |
| ENSG00000237686 | ENSG00000112658 |
| ENSG00000237686 | ENSG00000112659 |
| ENSG00000237686 | ENSG00000112667 |
| ENSG00000245261 | ENSG00000112667 |
| ENSG00000272463 | ENSG00000112685 |
| ENSG00000225793 | ENSG00000112697 |
| ENSG00000225793 | ENSG00000112701 |
| ENSG00000237174 | ENSG00000112701 |
| ENSG00000237686 | ENSG00000112715 |
| ENSG00000228170 | ENSG00000112739 |
| ENSG00000224843 | ENSG00000112763 |
| ENSG00000231889 | ENSG00000112769 |
| ENSG00000255992 | ENSG00000112787 |
| ENSG00000272154 | ENSG00000112852 |
| ENSG00000278936 | ENSG00000112852 |
| ENSG00000280029 | ENSG00000112852 |
| ENSG00000249637 | ENSG00000112855 |
| ENSG00000254363 | ENSG00000112855 |
| ENSG00000272154 | ENSG00000112855 |
| ENSG00000280029 | ENSG00000112855 |
| ENSG00000249476 | ENSG00000112893 |

|                 |                 |
|-----------------|-----------------|
| ENSG00000177738 | ENSG00000112964 |
| ENSG00000215068 | ENSG00000112964 |
| ENSG00000177738 | ENSG00000112972 |
| ENSG00000215068 | ENSG00000112972 |
| ENSG00000249593 | ENSG00000112981 |
| ENSG00000177738 | ENSG00000112992 |
| ENSG00000215068 | ENSG00000112992 |
| ENSG00000248464 | ENSG00000112996 |
| ENSG00000251141 | ENSG00000112996 |
| ENSG00000249593 | ENSG00000113013 |
| ENSG00000254363 | ENSG00000113068 |
| ENSG00000278936 | ENSG00000113068 |
| ENSG00000280029 | ENSG00000113068 |
| ENSG00000249637 | ENSG00000113070 |
| ENSG00000278936 | ENSG00000113070 |
| ENSG00000280029 | ENSG00000113070 |
| ENSG00000249637 | ENSG00000113108 |
| ENSG00000254363 | ENSG00000113108 |
| ENSG00000280029 | ENSG00000113108 |
| ENSG00000278936 | ENSG00000113119 |
| ENSG00000280029 | ENSG00000113119 |
| ENSG00000197083 | ENSG00000113140 |
| ENSG00000249035 | ENSG00000113140 |
| ENSG00000260581 | ENSG00000113140 |
| ENSG00000270978 | ENSG00000113140 |
| ENSG00000248596 | ENSG00000113194 |
| ENSG00000262096 | ENSG00000113205 |
| ENSG00000272154 | ENSG00000113205 |
| ENSG00000278936 | ENSG00000113205 |
| ENSG00000280029 | ENSG00000113205 |
| ENSG00000272154 | ENSG00000113209 |
| ENSG00000278936 | ENSG00000113209 |
| ENSG00000280029 | ENSG00000113209 |
| ENSG00000254099 | ENSG00000113211 |
| ENSG00000272154 | ENSG00000113211 |
| ENSG00000280029 | ENSG00000113211 |
| ENSG00000272154 | ENSG00000113212 |
| ENSG00000280029 | ENSG00000113212 |
| ENSG00000146001 | ENSG00000113248 |
| ENSG00000262096 | ENSG00000113248 |
| ENSG00000272070 | ENSG00000113248 |
| ENSG00000278936 | ENSG00000113248 |
| ENSG00000280029 | ENSG00000113248 |
| ENSG00000254138 | ENSG00000113361 |
| ENSG00000250764 | ENSG00000113384 |
| ENSG00000254138 | ENSG00000113384 |
| ENSG00000215158 | ENSG00000113407 |
| ENSG00000249572 | ENSG00000113407 |

|                 |                 |
|-----------------|-----------------|
| ENSG00000247121 | ENSG00000113441 |
| ENSG00000248734 | ENSG00000113441 |
| ENSG00000251314 | ENSG00000113441 |
| ENSG00000278936 | ENSG00000113555 |
| ENSG00000280029 | ENSG00000113555 |
| ENSG00000273345 | ENSG00000113583 |
| ENSG00000244968 | ENSG00000113594 |
| ENSG00000249740 | ENSG00000113594 |
| ENSG00000224186 | ENSG00000113621 |
| ENSG00000224186 | ENSG00000113648 |
| ENSG00000224186 | ENSG00000113658 |
| ENSG00000230551 | ENSG00000113712 |
| ENSG00000253686 | ENSG00000113719 |
| ENSG00000254211 | ENSG00000113719 |
| ENSG00000253406 | ENSG00000113721 |
| ENSG00000253686 | ENSG00000113732 |
| ENSG00000254211 | ENSG00000113732 |
| ENSG00000253955 | ENSG00000113739 |
| ENSG00000254211 | ENSG00000113739 |
| ENSG00000253686 | ENSG00000113742 |
| ENSG00000246596 | ENSG00000113758 |
| ENSG00000247679 | ENSG00000113758 |
| ENSG00000248996 | ENSG00000113758 |
| ENSG00000223358 | ENSG00000113790 |
| ENSG00000239959 | ENSG00000113805 |
| ENSG00000163915 | ENSG00000113838 |
| ENSG00000197099 | ENSG00000113838 |
| ENSG00000197099 | ENSG00000113916 |
| ENSG00000228804 | ENSG00000113916 |
| ENSG00000240882 | ENSG00000113924 |
| ENSG00000248724 | ENSG00000113971 |
| ENSG00000272758 | ENSG00000114013 |
| ENSG00000242337 | ENSG00000114019 |
| ENSG00000224078 | ENSG00000114062 |
| ENSG00000259905 | ENSG00000114062 |
| ENSG00000248932 | ENSG00000114115 |
| ENSG00000249417 | ENSG00000114125 |
| ENSG00000241570 | ENSG00000114126 |
| ENSG00000249417 | ENSG00000114126 |
| ENSG00000228350 | ENSG00000114268 |
| ENSG00000223343 | ENSG00000114270 |
| ENSG00000271973 | ENSG00000114270 |
| ENSG00000233058 | ENSG00000114315 |
| ENSG00000223343 | ENSG00000114316 |
| ENSG00000235016 | ENSG00000114316 |
| ENSG00000224769 | ENSG00000114331 |
| ENSG00000225822 | ENSG00000114331 |
| ENSG00000233058 | ENSG00000114331 |

|                 |                 |
|-----------------|-----------------|
| ENSG00000235016 | ENSG00000114353 |
| ENSG00000235016 | ENSG00000114388 |
| ENSG00000230454 | ENSG00000114395 |
| ENSG00000239828 | ENSG00000114439 |
| ENSG00000243701 | ENSG00000114439 |
| ENSG00000273125 | ENSG00000114439 |
| ENSG00000214135 | ENSG00000114473 |
| ENSG00000246022 | ENSG00000114520 |
| ENSG00000250934 | ENSG00000114520 |
| ENSG00000239482 | ENSG00000114529 |
| ENSG00000261488 | ENSG00000114529 |
| ENSG00000250218 | ENSG00000114544 |
| ENSG00000250934 | ENSG00000114544 |
| ENSG00000246022 | ENSG00000114554 |
| ENSG00000251448 | ENSG00000114554 |
| ENSG00000243795 | ENSG00000114573 |
| ENSG00000259976 | ENSG00000114573 |
| ENSG00000244300 | ENSG00000114626 |
| ENSG00000227398 | ENSG00000114646 |
| ENSG00000227398 | ENSG00000114650 |
| ENSG00000228252 | ENSG00000114670 |
| ENSG00000235016 | ENSG00000114735 |
| ENSG00000235016 | ENSG00000114738 |
| ENSG00000240429 | ENSG00000114757 |
| ENSG00000272699 | ENSG00000114757 |
| ENSG00000240602 | ENSG00000114771 |
| ENSG00000243305 | ENSG00000114771 |
| ENSG00000250271 | ENSG00000114771 |
| ENSG00000233441 | ENSG00000114796 |
| ENSG00000234617 | ENSG00000114812 |
| ENSG00000242797 | ENSG00000114841 |
| ENSG00000240875 | ENSG00000114850 |
| ENSG00000243176 | ENSG00000114850 |
| ENSG00000241163 | ENSG00000114861 |
| ENSG00000223358 | ENSG00000114867 |
| ENSG00000223725 | ENSG00000114948 |
| ENSG00000228577 | ENSG00000114948 |
| ENSG00000279220 | ENSG00000114948 |
| ENSG00000163016 | ENSG00000114978 |
| ENSG00000225439 | ENSG00000114978 |
| ENSG00000257800 | ENSG00000114978 |
| ENSG00000228486 | ENSG00000114982 |
| ENSG00000163016 | ENSG00000114993 |
| ENSG00000243389 | ENSG00000114999 |
| ENSG00000243389 | ENSG00000115008 |
| ENSG00000230606 | ENSG00000115073 |
| ENSG00000189223 | ENSG00000115084 |
| ENSG00000240356 | ENSG00000115084 |

|                 |                 |
|-----------------|-----------------|
| ENSG00000228486 | ENSG00000115085 |
| ENSG00000228857 | ENSG00000115091 |
| ENSG00000240356 | ENSG00000115091 |
| ENSG00000224165 | ENSG00000115129 |
| ENSG00000223642 | ENSG00000115183 |
| ENSG00000234072 | ENSG00000115207 |
| ENSG00000234072 | ENSG00000115216 |
| ENSG00000227938 | ENSG00000115226 |
| ENSG00000227403 | ENSG00000115233 |
| ENSG00000235724 | ENSG00000115233 |
| ENSG00000234072 | ENSG00000115234 |
| ENSG00000266933 | ENSG00000115255 |
| ENSG00000267317 | ENSG00000115257 |
| ENSG00000226121 | ENSG00000115263 |
| ENSG00000235724 | ENSG00000115263 |
| ENSG00000267283 | ENSG00000115266 |
| ENSG00000267317 | ENSG00000115266 |
| ENSG00000272183 | ENSG00000115274 |
| ENSG00000163016 | ENSG00000115282 |
| ENSG00000225439 | ENSG00000115282 |
| ENSG00000267122 | ENSG00000115286 |
| ENSG00000280486 | ENSG00000115286 |
| ENSG00000163016 | ENSG00000115307 |
| ENSG00000236209 | ENSG00000115307 |
| ENSG00000257702 | ENSG00000115307 |
| ENSG00000272180 | ENSG00000115355 |
| ENSG00000234281 | ENSG00000115365 |
| ENSG00000233251 | ENSG00000115380 |
| ENSG00000272180 | ENSG00000115380 |
| ENSG00000228509 | ENSG00000115419 |
| ENSG00000226791 | ENSG00000115446 |
| ENSG00000235444 | ENSG00000115457 |
| ENSG00000236886 | ENSG00000115457 |
| ENSG00000235042 | ENSG00000115461 |
| ENSG00000236886 | ENSG00000115461 |
| ENSG00000271889 | ENSG00000115484 |
| ENSG00000228363 | ENSG00000115525 |
| ENSG00000281162 | ENSG00000115590 |
| ENSG00000226925 | ENSG00000115594 |
| ENSG00000238273 | ENSG00000115641 |
| ENSG00000231802 | ENSG00000115661 |
| ENSG00000223374 | ENSG00000115677 |
| ENSG00000218416 | ENSG00000115685 |
| ENSG00000227479 | ENSG00000115685 |
| ENSG00000233806 | ENSG00000115685 |
| ENSG00000224272 | ENSG00000115694 |
| ENSG00000233806 | ENSG00000115694 |
| ENSG00000235092 | ENSG00000115738 |



|                 |                 |
|-----------------|-----------------|
| ENSG00000235665 | ENSG00000115738 |
| ENSG00000236790 | ENSG00000115738 |
| ENSG00000232973 | ENSG00000115825 |
| ENSG00000235848 | ENSG00000115825 |
| ENSG00000232973 | ENSG00000115828 |
| ENSG00000236213 | ENSG00000115828 |
| ENSG00000224043 | ENSG00000115839 |
| ENSG00000225205 | ENSG00000115840 |
| ENSG00000231367 | ENSG00000115841 |
| ENSG00000232973 | ENSG00000115841 |
| ENSG00000235848 | ENSG00000115841 |
| ENSG00000224043 | ENSG00000115850 |
| ENSG00000231890 | ENSG00000115850 |
| ENSG00000236204 | ENSG00000115884 |
| ENSG00000231367 | ENSG00000115904 |
| ENSG00000232973 | ENSG00000115904 |
| ENSG00000237798 | ENSG00000115935 |
| ENSG00000230408 | ENSG00000115942 |
| ENSG00000237380 | ENSG00000115966 |
| ENSG00000228384 | ENSG00000115998 |
| ENSG00000228384 | ENSG00000116005 |
| ENSG00000266933 | ENSG00000116017 |
| ENSG00000163016 | ENSG00000116096 |
| ENSG00000278811 | ENSG00000116128 |
| ENSG00000231407 | ENSG00000116132 |
| ENSG00000175147 | ENSG00000116138 |
| ENSG00000224459 | ENSG00000116138 |
| ENSG00000269896 | ENSG00000116151 |
| ENSG00000232993 | ENSG00000116171 |
| ENSG00000242193 | ENSG00000116191 |
| ENSG00000254154 | ENSG00000116191 |
| ENSG00000242193 | ENSG00000116194 |
| ENSG00000254154 | ENSG00000116194 |
| ENSG00000242193 | ENSG00000116199 |
| ENSG00000254154 | ENSG00000116199 |
| ENSG00000219102 | ENSG00000116205 |
| ENSG00000241720 | ENSG00000116299 |
| ENSG00000224699 | ENSG00000116337 |
| ENSG00000227963 | ENSG00000116337 |
| ENSG00000235407 | ENSG00000116337 |
| ENSG00000240194 | ENSG00000116337 |
| ENSG00000241720 | ENSG00000116337 |
| ENSG00000235407 | ENSG00000116455 |
| ENSG00000240194 | ENSG00000116455 |
| ENSG00000227811 | ENSG00000116459 |
| ENSG00000236065 | ENSG00000116478 |
| ENSG00000224167 | ENSG00000116489 |
| ENSG00000226419 | ENSG00000116489 |

|                 |                 |
|-----------------|-----------------|
| ENSG00000238198 | ENSG00000116489 |
| ENSG00000225313 | ENSG00000116514 |
| ENSG00000282111 | ENSG00000116574 |
| ENSG00000236947 | ENSG00000116584 |
| ENSG00000246203 | ENSG00000116584 |
| ENSG00000272405 | ENSG00000116604 |
| ENSG00000235545 | ENSG00000116641 |
| ENSG00000232860 | ENSG00000116698 |
| ENSG00000229956 | ENSG00000116761 |
| ENSG00000238198 | ENSG00000116774 |
| ENSG00000175147 | ENSG00000116786 |
| ENSG00000224459 | ENSG00000116786 |
| ENSG00000237938 | ENSG00000116786 |
| ENSG00000080947 | ENSG00000116809 |
| ENSG00000175147 | ENSG00000116809 |
| ENSG00000186715 | ENSG00000116809 |
| ENSG00000226029 | ENSG00000116809 |
| ENSG00000268869 | ENSG00000116809 |
| ENSG00000236137 | ENSG00000116815 |
| ENSG00000116883 | ENSG00000116863 |
| ENSG00000224238 | ENSG00000116874 |
| ENSG00000198857 | ENSG00000116882 |
| ENSG00000224238 | ENSG00000116882 |
| ENSG00000231365 | ENSG00000116882 |
| ENSG00000228436 | ENSG00000116954 |
| ENSG00000230325 | ENSG00000116977 |
| ENSG00000228436 | ENSG00000116981 |
| ENSG00000225333 | ENSG00000116983 |
| ENSG00000182109 | ENSG00000116990 |
| ENSG00000237899 | ENSG00000116990 |
| ENSG00000243970 | ENSG00000116990 |
| ENSG00000237899 | ENSG00000117013 |
| ENSG00000281207 | ENSG00000117016 |
| ENSG00000219201 | ENSG00000117069 |
| ENSG00000228863 | ENSG00000117091 |
| ENSG00000226526 | ENSG00000117115 |
| ENSG00000268869 | ENSG00000117115 |
| ENSG00000122432 | ENSG00000117133 |
| ENSG00000223653 | ENSG00000117133 |
| ENSG00000243323 | ENSG00000117139 |
| ENSG00000232995 | ENSG00000117143 |
| ENSG00000122432 | ENSG00000117151 |
| ENSG00000223653 | ENSG00000117151 |
| ENSG00000240520 | ENSG00000117151 |
| ENSG00000223653 | ENSG00000117174 |
| ENSG00000261737 | ENSG00000117174 |
| ENSG00000282057 | ENSG00000117174 |
| ENSG00000230735 | ENSG00000117228 |

|                 |                 |
|-----------------|-----------------|
| ENSG00000231999 | ENSG00000117228 |
| ENSG00000237505 | ENSG00000117228 |
| ENSG00000225603 | ENSG00000117262 |
| ENSG00000234222 | ENSG00000117262 |
| ENSG00000237188 | ENSG00000117262 |
| ENSG00000278811 | ENSG00000117262 |
| ENSG00000281406 | ENSG00000117266 |
| ENSG00000231105 | ENSG00000117298 |
| ENSG00000225315 | ENSG00000117305 |
| ENSG00000236810 | ENSG00000117305 |
| ENSG00000225315 | ENSG00000117308 |
| ENSG00000264443 | ENSG00000117308 |
| ENSG00000203709 | ENSG00000117335 |
| ENSG00000227533 | ENSG00000117385 |
| ENSG00000228192 | ENSG00000117385 |
| ENSG00000227533 | ENSG00000117394 |
| ENSG00000227533 | ENSG00000117395 |
| ENSG00000230615 | ENSG00000117395 |
| ENSG00000230615 | ENSG00000117407 |
| ENSG00000229348 | ENSG00000117408 |
| ENSG00000230615 | ENSG00000117408 |
| ENSG00000230615 | ENSG00000117411 |
| ENSG00000230615 | ENSG00000117419 |
| ENSG00000230615 | ENSG00000117425 |
| ENSG00000232022 | ENSG00000117448 |
| ENSG00000232022 | ENSG00000117472 |
| ENSG00000232022 | ENSG00000117480 |
| ENSG00000232022 | ENSG00000117481 |
| ENSG00000223745 | ENSG00000117500 |
| ENSG00000223745 | ENSG00000117505 |
| ENSG00000224081 | ENSG00000117525 |
| ENSG00000226026 | ENSG00000117525 |
| ENSG00000224081 | ENSG00000117528 |
| ENSG00000228852 | ENSG00000117528 |
| ENSG00000235501 | ENSG00000117528 |
| ENSG00000233184 | ENSG00000117543 |
| ENSG00000232878 | ENSG00000117569 |
| ENSG00000264443 | ENSG00000117616 |
| ENSG00000228172 | ENSG00000117640 |
| ENSG00000236155 | ENSG00000117682 |
| ENSG00000230461 | ENSG00000117707 |
| ENSG00000227742 | ENSG00000117862 |
| ENSG00000266993 | ENSG00000117862 |
| ENSG00000233038 | ENSG00000117868 |
| ENSG00000259495 | ENSG00000117899 |
| ENSG00000259581 | ENSG00000117906 |
| ENSG00000260776 | ENSG00000117906 |
| ENSG00000233930 | ENSG00000117984 |

|                 |                 |
|-----------------|-----------------|
| ENSG00000269821 | ENSG00000117984 |
| ENSG00000255422 | ENSG00000118058 |
| ENSG00000255435 | ENSG00000118058 |
| ENSG00000235910 | ENSG00000118137 |
| ENSG00000268001 | ENSG00000118162 |
| ENSG00000225166 | ENSG00000118242 |
| ENSG00000232485 | ENSG00000118242 |
| ENSG00000236886 | ENSG00000118242 |
| ENSG00000225216 | ENSG00000118257 |
| ENSG00000223725 | ENSG00000118260 |
| ENSG00000223725 | ENSG00000118263 |
| ENSG00000279220 | ENSG00000118263 |
| ENSG00000225793 | ENSG00000118407 |
| ENSG00000237174 | ENSG00000118407 |
| ENSG00000229956 | ENSG00000118454 |
| ENSG00000229036 | ENSG00000118495 |
| ENSG00000278206 | ENSG00000118495 |
| ENSG00000227220 | ENSG00000118507 |
| ENSG00000227678 | ENSG00000118507 |
| ENSG00000220494 | ENSG00000118508 |
| ENSG00000233452 | ENSG00000118508 |
| ENSG00000235652 | ENSG00000118508 |
| ENSG00000231028 | ENSG00000118513 |
| ENSG00000236700 | ENSG00000118513 |
| ENSG00000237596 | ENSG00000118513 |
| ENSG00000227954 | ENSG00000118515 |
| ENSG00000236700 | ENSG00000118515 |
| ENSG00000227945 | ENSG00000118518 |
| ENSG00000227220 | ENSG00000118523 |
| ENSG00000227954 | ENSG00000118526 |
| ENSG00000231205 | ENSG00000118620 |
| ENSG00000268278 | ENSG00000118620 |
| ENSG00000268555 | ENSG00000118620 |
| ENSG00000268658 | ENSG00000118620 |
| ENSG00000243150 | ENSG00000118849 |
| ENSG00000267072 | ENSG00000118894 |
| ENSG00000267072 | ENSG00000118900 |
| ENSG00000232800 | ENSG00000118960 |
| ENSG00000270100 | ENSG00000118961 |
| ENSG00000236204 | ENSG00000118965 |
| ENSG00000247121 | ENSG00000118985 |
| ENSG00000251314 | ENSG00000118985 |
| ENSG00000204706 | ENSG00000119138 |
| ENSG00000235092 | ENSG00000119203 |
| ENSG00000239300 | ENSG00000119203 |
| ENSG00000271855 | ENSG00000119203 |
| ENSG00000214135 | ENSG00000119231 |
| ENSG00000270130 | ENSG00000119242 |

|                 |                 |
|-----------------|-----------------|
| ENSG00000225684 | ENSG00000119314 |
| ENSG00000228623 | ENSG00000119314 |
| ENSG00000230185 | ENSG00000119314 |
| ENSG00000259953 | ENSG00000119314 |
| ENSG00000228623 | ENSG00000119321 |
| ENSG00000230185 | ENSG00000119321 |
| ENSG00000204055 | ENSG00000119383 |
| ENSG00000228395 | ENSG00000119392 |
| ENSG00000226752 | ENSG00000119403 |
| ENSG00000228623 | ENSG00000119411 |
| ENSG00000230185 | ENSG00000119411 |
| ENSG00000228623 | ENSG00000119457 |
| ENSG00000228623 | ENSG00000119471 |
| ENSG00000230185 | ENSG00000119471 |
| ENSG00000237461 | ENSG00000119508 |
| ENSG00000237461 | ENSG00000119509 |
| ENSG00000233621 | ENSG00000119535 |
| ENSG00000267390 | ENSG00000119537 |
| ENSG00000267787 | ENSG00000119547 |
| ENSG00000266933 | ENSG00000119559 |
| ENSG00000213753 | ENSG00000119574 |
| ENSG00000232098 | ENSG00000119574 |
| ENSG00000267858 | ENSG00000119574 |
| ENSG00000268230 | ENSG00000119574 |
| ENSG00000224721 | ENSG00000119616 |
| ENSG00000258891 | ENSG00000119616 |
| ENSG00000258603 | ENSG00000119636 |
| ENSG00000259138 | ENSG00000119638 |
| ENSG00000246548 | ENSG00000119669 |
| ENSG00000258569 | ENSG00000119669 |
| ENSG00000273729 | ENSG00000119669 |
| ENSG00000259319 | ENSG00000119684 |
| ENSG00000259687 | ENSG00000119684 |
| ENSG00000224721 | ENSG00000119689 |
| ENSG00000258891 | ENSG00000119689 |
| ENSG00000258301 | ENSG00000119699 |
| ENSG00000259138 | ENSG00000119703 |
| ENSG00000259319 | ENSG00000119703 |
| ENSG00000251393 | ENSG00000119711 |
| ENSG00000258875 | ENSG00000119714 |
| ENSG00000258891 | ENSG00000119725 |
| ENSG00000259065 | ENSG00000119725 |
| ENSG00000234072 | ENSG00000119760 |
| ENSG00000223935 | ENSG00000119844 |
| ENSG00000260101 | ENSG00000119844 |
| ENSG00000223935 | ENSG00000119862 |
| ENSG00000271889 | ENSG00000119866 |
| ENSG00000250116 | ENSG00000119878 |

|                 |                 |
|-----------------|-----------------|
| ENSG00000232295 | ENSG00000119900 |
| ENSG00000233237 | ENSG00000119900 |
| ENSG00000227695 | ENSG00000119906 |
| ENSG00000226688 | ENSG00000119977 |
| ENSG00000226009 | ENSG00000120029 |
| ENSG00000282772 | ENSG00000120029 |
| ENSG00000235823 | ENSG00000120053 |
| ENSG00000231970 | ENSG00000120057 |
| ENSG00000264057 | ENSG00000120063 |
| ENSG00000253686 | ENSG00000120129 |
| ENSG00000225408 | ENSG00000120215 |
| ENSG00000225489 | ENSG00000120215 |
| ENSG00000228739 | ENSG00000120217 |
| ENSG00000268592 | ENSG00000120256 |
| ENSG00000278936 | ENSG00000120318 |
| ENSG00000280029 | ENSG00000120318 |
| ENSG00000272154 | ENSG00000120324 |
| ENSG00000278936 | ENSG00000120324 |
| ENSG00000280029 | ENSG00000120324 |
| ENSG00000272154 | ENSG00000120327 |
| ENSG00000278936 | ENSG00000120327 |
| ENSG00000280029 | ENSG00000120327 |
| ENSG00000272154 | ENSG00000120328 |
| ENSG00000278936 | ENSG00000120328 |
| ENSG00000280029 | ENSG00000120328 |
| ENSG00000231407 | ENSG00000120370 |
| ENSG00000245498 | ENSG00000120458 |
| ENSG00000249695 | ENSG00000120645 |
| ENSG00000250132 | ENSG00000120645 |
| ENSG00000168852 | ENSG00000120662 |
| ENSG00000215483 | ENSG00000120662 |
| ENSG00000223685 | ENSG00000120686 |
| ENSG00000235550 | ENSG00000120686 |
| ENSG00000224743 | ENSG00000120694 |
| ENSG00000120664 | ENSG00000120697 |
| ENSG00000224186 | ENSG00000120708 |
| ENSG00000249593 | ENSG00000120725 |
| ENSG00000257681 | ENSG00000120820 |
| ENSG00000251191 | ENSG00000120875 |
| ENSG00000259607 | ENSG00000120875 |
| ENSG00000253125 | ENSG00000120889 |
| ENSG00000253837 | ENSG00000120889 |
| ENSG00000253125 | ENSG00000120896 |
| ENSG00000253200 | ENSG00000120896 |
| ENSG00000253837 | ENSG00000120896 |
| ENSG00000254230 | ENSG00000120896 |
| ENSG00000251034 | ENSG00000120910 |
| ENSG00000253125 | ENSG00000120910 |

|                 |                 |
|-----------------|-----------------|
| ENSG00000253837 | ENSG00000120910 |
| ENSG00000265542 | ENSG00000121060 |
| ENSG00000265542 | ENSG00000121064 |
| ENSG00000187013 | ENSG00000121068 |
| ENSG00000213753 | ENSG00000121410 |
| ENSG00000232098 | ENSG00000121410 |
| ENSG00000267858 | ENSG00000121410 |
| ENSG00000268230 | ENSG00000121410 |
| ENSG00000268895 | ENSG00000121410 |
| ENSG00000269473 | ENSG00000121410 |
| ENSG00000242622 | ENSG00000121577 |
| ENSG00000243795 | ENSG00000121579 |
| ENSG00000259976 | ENSG00000121579 |
| ENSG00000240254 | ENSG00000121594 |
| ENSG00000254427 | ENSG00000121653 |
| ENSG00000078319 | ENSG00000121716 |
| ENSG00000242294 | ENSG00000121716 |
| ENSG00000272752 | ENSG00000121716 |
| ENSG00000235790 | ENSG00000121764 |
| ENSG00000220785 | ENSG00000121775 |
| ENSG00000236065 | ENSG00000121775 |
| ENSG00000227398 | ENSG00000121807 |
| ENSG00000272699 | ENSG00000121864 |
| ENSG00000205794 | ENSG00000121892 |
| ENSG00000249348 | ENSG00000121892 |
| ENSG00000236065 | ENSG00000121903 |
| ENSG00000241720 | ENSG00000121940 |
| ENSG00000232377 | ENSG00000121964 |
| ENSG00000224043 | ENSG00000121988 |
| ENSG00000250889 | ENSG00000122008 |
| ENSG00000275294 | ENSG00000122026 |
| ENSG00000179141 | ENSG00000122042 |
| ENSG00000214135 | ENSG00000122068 |
| ENSG00000225361 | ENSG00000122140 |
| ENSG00000226706 | ENSG00000122140 |
| ENSG00000237339 | ENSG00000122140 |
| ENSG00000248596 | ENSG00000122203 |
| ENSG00000251458 | ENSG00000122203 |
| ENSG00000224985 | ENSG00000122218 |
| ENSG00000228863 | ENSG00000122218 |
| ENSG00000260448 | ENSG00000122257 |
| ENSG00000225484 | ENSG00000122359 |
| ENSG00000278616 | ENSG00000122359 |
| ENSG00000196566 | ENSG00000122367 |
| ENSG00000225913 | ENSG00000122367 |
| ENSG00000272631 | ENSG00000122367 |
| ENSG00000223482 | ENSG00000122376 |
| ENSG00000224914 | ENSG00000122376 |

|                 |                 |
|-----------------|-----------------|
| ENSG00000225484 | ENSG00000122378 |
| ENSG00000260565 | ENSG00000122386 |
| ENSG00000261093 | ENSG00000122386 |
| ENSG00000262370 | ENSG00000122386 |
| ENSG00000263072 | ENSG00000122386 |
| ENSG00000260565 | ENSG00000122390 |
| ENSG00000235927 | ENSG00000122420 |
| ENSG00000233184 | ENSG00000122477 |
| ENSG00000226026 | ENSG00000122481 |
| ENSG00000228852 | ENSG00000122481 |
| ENSG00000233593 | ENSG00000122482 |
| ENSG00000261126 | ENSG00000122490 |
| ENSG00000267270 | ENSG00000122490 |
| ENSG00000214783 | ENSG00000122515 |
| ENSG00000239556 | ENSG00000122515 |
| ENSG00000273432 | ENSG00000122515 |
| ENSG00000228878 | ENSG00000122557 |
| ENSG00000271122 | ENSG00000122557 |
| ENSG00000214870 | ENSG00000122565 |
| ENSG00000214870 | ENSG00000122566 |
| ENSG00000227855 | ENSG00000122574 |
| ENSG00000226329 | ENSG00000122591 |
| ENSG00000205763 | ENSG00000122642 |
| ENSG00000214783 | ENSG00000122678 |
| ENSG00000228903 | ENSG00000122678 |
| ENSG00000273432 | ENSG00000122678 |
| ENSG00000235453 | ENSG00000122692 |
| ENSG00000227388 | ENSG00000122707 |
| ENSG00000230074 | ENSG00000122733 |
| ENSG00000261215 | ENSG00000122733 |
| ENSG00000281205 | ENSG00000122733 |
| ENSG00000231794 | ENSG00000122783 |
| ENSG00000272941 | ENSG00000122783 |
| ENSG00000273297 | ENSG00000122783 |
| ENSG00000273297 | ENSG00000122786 |
| ENSG00000221817 | ENSG00000122861 |
| ENSG00000271848 | ENSG00000122861 |
| ENSG00000229261 | ENSG00000122862 |
| ENSG00000236756 | ENSG00000122882 |
| ENSG00000242338 | ENSG00000122882 |
| ENSG00000271816 | ENSG00000122882 |
| ENSG00000271848 | ENSG00000122882 |
| ENSG00000272630 | ENSG00000122882 |
| ENSG00000236756 | ENSG00000122884 |
| ENSG00000271848 | ENSG00000122884 |
| ENSG00000258210 | ENSG00000122970 |
| ENSG00000227742 | ENSG00000123080 |
| ENSG00000227742 | ENSG00000123091 |



|                 |                 |
|-----------------|-----------------|
| ENSG00000246695 | ENSG00000123094 |
| ENSG00000255750 | ENSG00000123094 |
| ENSG00000256234 | ENSG00000123094 |
| ENSG00000255750 | ENSG00000123095 |
| ENSG00000255968 | ENSG00000123095 |
| ENSG00000256234 | ENSG00000123095 |
| ENSG00000255968 | ENSG00000123096 |
| ENSG00000255750 | ENSG00000123104 |
| ENSG00000255968 | ENSG00000123104 |
| ENSG00000256234 | ENSG00000123104 |
| ENSG00000256377 | ENSG00000123104 |
| ENSG00000254231 | ENSG00000123124 |
| ENSG00000219665 | ENSG00000123144 |
| ENSG00000257588 | ENSG00000123268 |
| ENSG00000248265 | ENSG00000123338 |
| ENSG00000258086 | ENSG00000123338 |
| ENSG00000182796 | ENSG00000123342 |
| ENSG00000257735 | ENSG00000123352 |
| ENSG00000258017 | ENSG00000123352 |
| ENSG00000258101 | ENSG00000123352 |
| ENSG00000257616 | ENSG00000123358 |
| ENSG00000250451 | ENSG00000123360 |
| ENSG00000258086 | ENSG00000123360 |
| ENSG00000258317 | ENSG00000123374 |
| ENSG00000248265 | ENSG00000123415 |
| ENSG00000250742 | ENSG00000123415 |
| ENSG00000257346 | ENSG00000123416 |
| ENSG00000257735 | ENSG00000123416 |
| ENSG00000257913 | ENSG00000123416 |
| ENSG00000258017 | ENSG00000123416 |
| ENSG00000258057 | ENSG00000123416 |
| ENSG00000255197 | ENSG00000123444 |
| ENSG00000225762 | ENSG00000123472 |
| ENSG00000232022 | ENSG00000123472 |
| ENSG00000240050 | ENSG00000123500 |
| ENSG00000231154 | ENSG00000123562 |
| ENSG00000231154 | ENSG00000123570 |
| ENSG00000229083 | ENSG00000123595 |
| ENSG00000234350 | ENSG00000123600 |
| ENSG00000224490 | ENSG00000123607 |
| ENSG00000223642 | ENSG00000123636 |
| ENSG00000226266 | ENSG00000123636 |
| ENSG00000249035 | ENSG00000123643 |
| ENSG00000153363 | ENSG00000123684 |
| ENSG00000203706 | ENSG00000123689 |
| ENSG00000232160 | ENSG00000123728 |
| ENSG00000247950 | ENSG00000123739 |
| ENSG00000256612 | ENSG00000123810 |

|                 |                 |
|-----------------|-----------------|
| ENSG00000237118 | ENSG00000123815 |
| ENSG00000256612 | ENSG00000123815 |
| ENSG00000267107 | ENSG00000123815 |
| ENSG00000162888 | ENSG00000123843 |
| ENSG00000244558 | ENSG00000124120 |
| ENSG00000244558 | ENSG00000124134 |
| ENSG00000271984 | ENSG00000124145 |
| ENSG00000275894 | ENSG00000124145 |
| ENSG00000204044 | ENSG00000124155 |
| ENSG00000244558 | ENSG00000124155 |
| ENSG00000269549 | ENSG00000124155 |
| ENSG00000273828 | ENSG00000124155 |
| ENSG00000269549 | ENSG00000124160 |
| ENSG00000223891 | ENSG00000124193 |
| ENSG00000124224 | ENSG00000124225 |
| ENSG00000244558 | ENSG00000124249 |
| ENSG00000244558 | ENSG00000124251 |
| ENSG00000269549 | ENSG00000124251 |
| ENSG00000273828 | ENSG00000124251 |
| ENSG00000124224 | ENSG00000124253 |
| ENSG00000204044 | ENSG00000124257 |
| ENSG00000269549 | ENSG00000124257 |
| ENSG00000273828 | ENSG00000124257 |
| ENSG00000232593 | ENSG00000124313 |
| ENSG00000228384 | ENSG00000124370 |
| ENSG00000233098 | ENSG00000124422 |
| ENSG00000266903 | ENSG00000124459 |
| ENSG00000236276 | ENSG00000124479 |
| ENSG00000224843 | ENSG00000124508 |
| ENSG00000237686 | ENSG00000124541 |
| ENSG00000224846 | ENSG00000124570 |
| ENSG00000228170 | ENSG00000124570 |
| ENSG00000230438 | ENSG00000124570 |
| ENSG00000244041 | ENSG00000124570 |
| ENSG00000271361 | ENSG00000124570 |
| ENSG00000231881 | ENSG00000124571 |
| ENSG00000237686 | ENSG00000124571 |
| ENSG00000245261 | ENSG00000124571 |
| ENSG00000237686 | ENSG00000124574 |
| ENSG00000181524 | ENSG00000124587 |
| ENSG00000231113 | ENSG00000124587 |
| ENSG00000224846 | ENSG00000124588 |
| ENSG00000244041 | ENSG00000124588 |
| ENSG00000261068 | ENSG00000124593 |
| ENSG00000237686 | ENSG00000124608 |
| ENSG00000271755 | ENSG00000124613 |
| ENSG00000224843 | ENSG00000124635 |
| ENSG00000281706 | ENSG00000124635 |

|                 |                 |
|-----------------|-----------------|
| ENSG00000203362 | ENSG00000124733 |
| ENSG00000245261 | ENSG00000124733 |
| ENSG00000216775 | ENSG00000124743 |
| ENSG00000227885 | ENSG00000124743 |
| ENSG00000231683 | ENSG00000124743 |
| ENSG00000224666 | ENSG00000124762 |
| ENSG00000238221 | ENSG00000124783 |
| ENSG00000271978 | ENSG00000124787 |
| ENSG00000272341 | ENSG00000124788 |
| ENSG00000249942 | ENSG00000124875 |
| ENSG00000249942 | ENSG00000124882 |
| ENSG00000124915 | ENSG00000124920 |
| ENSG00000243742 | ENSG00000124942 |
| ENSG00000255717 | ENSG00000124942 |
| ENSG00000249767 | ENSG00000125089 |
| ENSG00000270049 | ENSG00000125122 |
| ENSG00000260240 | ENSG00000125166 |
| ENSG00000260467 | ENSG00000125170 |
| ENSG00000258545 | ENSG00000125354 |
| ENSG00000233382 | ENSG00000125355 |
| ENSG00000237356 | ENSG00000125384 |
| ENSG00000249673 | ENSG00000125388 |
| ENSG00000227036 | ENSG00000125398 |
| ENSG00000236088 | ENSG00000125430 |
| ENSG00000203761 | ENSG00000125459 |
| ENSG00000246203 | ENSG00000125459 |
| ENSG00000267265 | ENSG00000125505 |
| ENSG00000267838 | ENSG00000125505 |
| ENSG00000277496 | ENSG00000125531 |
| ENSG00000189223 | ENSG00000125538 |
| ENSG00000240356 | ENSG00000125538 |
| ENSG00000240356 | ENSG00000125637 |
| ENSG00000266983 | ENSG00000125648 |
| ENSG00000268758 | ENSG00000125648 |
| ENSG00000266983 | ENSG00000125650 |
| ENSG00000269802 | ENSG00000125650 |
| ENSG00000269802 | ENSG00000125656 |
| ENSG00000214546 | ENSG00000125686 |
| ENSG00000265460 | ENSG00000125686 |
| ENSG00000266983 | ENSG00000125730 |
| ENSG00000269680 | ENSG00000125731 |
| ENSG00000266983 | ENSG00000125733 |
| ENSG00000269680 | ENSG00000125733 |
| ENSG00000269802 | ENSG00000125733 |
| ENSG00000266903 | ENSG00000125740 |
| ENSG00000266903 | ENSG00000125741 |
| ENSG00000267348 | ENSG00000125741 |
| ENSG00000266903 | ENSG00000125744 |

|                 |                 |
|-----------------|-----------------|
| ENSG00000267348 | ENSG00000125744 |
| ENSG00000267757 | ENSG00000125744 |
| ENSG00000266903 | ENSG00000125746 |
| ENSG00000267348 | ENSG00000125746 |
| ENSG00000266903 | ENSG00000125753 |
| ENSG00000267348 | ENSG00000125753 |
| ENSG00000275632 | ENSG00000125772 |
| ENSG00000278719 | ENSG00000125772 |
| ENSG00000234684 | ENSG00000125775 |
| ENSG00000235958 | ENSG00000125779 |
| ENSG00000235958 | ENSG00000125817 |
| ENSG00000229766 | ENSG00000125827 |
| ENSG00000225377 | ENSG00000125841 |
| ENSG00000234684 | ENSG00000125875 |
| ENSG00000225377 | ENSG00000125895 |
| ENSG00000267551 | ENSG00000125910 |
| ENSG00000225315 | ENSG00000125944 |
| ENSG00000236810 | ENSG00000125945 |
| ENSG00000249087 | ENSG00000125945 |
| ENSG00000270050 | ENSG00000125962 |
| ENSG00000271147 | ENSG00000125962 |
| ENSG00000088340 | ENSG00000125966 |
| ENSG00000230753 | ENSG00000125970 |
| ENSG00000230753 | ENSG00000125971 |
| ENSG00000088340 | ENSG00000125991 |
| ENSG00000260032 | ENSG00000125991 |
| ENSG00000232593 | ENSG00000126012 |
| ENSG00000235016 | ENSG00000126062 |
| ENSG00000230615 | ENSG00000126088 |
| ENSG00000227533 | ENSG00000126091 |
| ENSG00000230615 | ENSG00000126091 |
| ENSG00000230615 | ENSG00000126106 |
| ENSG00000230615 | ENSG00000126107 |
| ENSG00000281912 | ENSG00000126107 |
| ENSG00000235280 | ENSG00000126217 |
| ENSG00000233695 | ENSG00000126218 |
| ENSG00000267874 | ENSG00000126243 |
| ENSG00000271032 | ENSG00000126243 |
| ENSG00000271366 | ENSG00000126243 |
| ENSG00000205786 | ENSG00000126247 |
| ENSG00000267698 | ENSG00000126247 |
| ENSG00000271032 | ENSG00000126261 |
| ENSG00000271366 | ENSG00000126261 |
| ENSG00000267049 | ENSG00000126262 |
| ENSG00000267698 | ENSG00000126262 |
| ENSG00000265460 | ENSG00000126368 |
| ENSG00000245532 | ENSG00000126391 |
| ENSG00000251562 | ENSG00000126391 |

|                 |                 |
|-----------------|-----------------|
| ENSG00000235191 | ENSG00000126457 |
| ENSG00000243829 | ENSG00000126457 |
| ENSG00000268006 | ENSG00000126457 |
| ENSG00000268854 | ENSG00000126457 |
| ENSG00000161643 | ENSG00000126458 |
| ENSG00000268006 | ENSG00000126458 |
| ENSG00000273189 | ENSG00000126458 |
| ENSG00000268006 | ENSG00000126461 |
| ENSG00000164669 | ENSG00000126522 |
| ENSG00000224316 | ENSG00000126522 |
| ENSG00000226002 | ENSG00000126522 |
| ENSG00000230189 | ENSG00000126522 |
| ENSG00000234185 | ENSG00000126522 |
| ENSG00000272693 | ENSG00000126522 |
| ENSG00000226824 | ENSG00000126524 |
| ENSG00000229180 | ENSG00000126524 |
| ENSG00000230189 | ENSG00000126524 |
| ENSG00000232546 | ENSG00000126524 |
| ENSG00000234500 | ENSG00000126524 |
| ENSG00000213373 | ENSG00000126561 |
| ENSG00000267765 | ENSG00000126561 |
| ENSG00000267072 | ENSG00000126603 |
| ENSG00000205885 | ENSG00000126749 |
| ENSG00000240370 | ENSG00000126749 |
| ENSG00000204620 | ENSG00000126759 |
| ENSG00000204620 | ENSG00000126767 |
| ENSG00000259868 | ENSG00000126777 |
| ENSG00000234911 | ENSG00000126804 |
| ENSG00000258824 | ENSG00000126804 |
| ENSG00000259116 | ENSG00000126804 |
| ENSG00000272909 | ENSG00000126804 |
| ENSG00000258824 | ENSG00000126821 |
| ENSG00000214719 | ENSG00000126860 |
| ENSG00000264538 | ENSG00000126860 |
| ENSG00000266865 | ENSG00000126860 |
| ENSG00000236986 | ENSG00000126883 |
| ENSG00000261101 | ENSG00000126947 |
| ENSG00000254035 | ENSG00000127022 |
| ENSG00000187984 | ENSG00000127081 |
| ENSG00000224809 | ENSG00000127081 |
| ENSG00000225511 | ENSG00000127081 |
| ENSG00000275318 | ENSG00000127081 |
| ENSG00000230638 | ENSG00000127124 |
| ENSG00000235872 | ENSG00000127314 |
| ENSG00000247131 | ENSG00000127328 |
| ENSG00000256248 | ENSG00000127334 |
| ENSG00000196810 | ENSG00000127418 |
| ENSG00000267106 | ENSG00000127445 |

|                 |                 |
|-----------------|-----------------|
| ENSG00000230424 | ENSG00000127463 |
| ENSG00000272084 | ENSG00000127463 |
| ENSG00000230424 | ENSG00000127481 |
| ENSG00000117242 | ENSG00000127483 |
| ENSG00000187952 | ENSG00000127483 |
| ENSG00000269481 | ENSG00000127511 |
| ENSG00000268087 | ENSG00000127526 |
| ENSG00000269439 | ENSG00000127526 |
| ENSG00000269481 | ENSG00000127526 |
| ENSG00000269085 | ENSG00000127533 |
| ENSG00000269439 | ENSG00000127533 |
| ENSG00000215154 | ENSG00000127554 |
| ENSG00000261790 | ENSG00000127554 |
| ENSG00000236829 | ENSG00000127580 |
| ENSG00000261641 | ENSG00000127580 |
| ENSG00000261659 | ENSG00000127580 |
| ENSG00000260425 | ENSG00000127586 |
| ENSG00000182109 | ENSG00000127603 |
| ENSG00000243970 | ENSG00000127603 |
| ENSG00000266978 | ENSG00000127616 |
| ENSG00000267274 | ENSG00000127616 |
| ENSG00000267571 | ENSG00000127663 |
| ENSG00000269807 | ENSG00000127663 |
| ENSG00000223923 | ENSG00000127837 |
| ENSG00000223923 | ENSG00000127838 |
| ENSG00000275294 | ENSG00000127870 |
| ENSG00000166917 | ENSG00000127884 |
| ENSG00000214279 | ENSG00000127884 |
| ENSG00000188693 | ENSG00000127914 |
| ENSG00000236861 | ENSG00000127920 |
| ENSG00000231764 | ENSG00000127922 |
| ENSG00000205485 | ENSG00000127946 |
| ENSG00000186704 | ENSG00000127947 |
| ENSG00000214293 | ENSG00000127947 |
| ENSG00000205485 | ENSG00000127951 |
| ENSG00000214439 | ENSG00000127951 |
| ENSG00000227038 | ENSG00000127952 |
| ENSG00000244055 | ENSG00000127980 |
| ENSG00000188693 | ENSG00000127989 |
| ENSG00000236861 | ENSG00000127990 |
| ENSG00000233622 | ENSG00000128000 |
| ENSG00000256612 | ENSG00000128000 |
| ENSG00000248115 | ENSG00000128045 |
| ENSG00000249341 | ENSG00000128045 |
| ENSG00000245067 | ENSG00000128050 |
| ENSG00000184319 | ENSG00000128159 |
| ENSG00000273253 | ENSG00000128159 |
| ENSG00000161132 | ENSG00000128185 |

|                 |                 |
|-----------------|-----------------|
| ENSG00000243762 | ENSG00000128191 |
| ENSG00000225465 | ENSG00000128250 |
| ENSG00000178248 | ENSG00000128266 |
| ENSG00000215478 | ENSG00000128266 |
| ENSG00000234353 | ENSG00000128266 |
| ENSG00000280623 | ENSG00000128266 |
| ENSG00000128262 | ENSG00000128271 |
| ENSG00000178803 | ENSG00000128271 |
| ENSG00000218537 | ENSG00000128271 |
| ENSG00000272578 | ENSG00000128271 |
| ENSG00000272733 | ENSG00000128271 |
| ENSG00000273000 | ENSG00000128271 |
| ENSG00000279467 | ENSG00000128271 |
| ENSG00000280623 | ENSG00000128271 |
| ENSG00000172250 | ENSG00000128274 |
| ENSG00000235237 | ENSG00000128283 |
| ENSG00000244627 | ENSG00000128283 |
| ENSG00000279010 | ENSG00000128283 |
| ENSG00000183822 | ENSG00000128284 |
| ENSG00000225783 | ENSG00000128294 |
| ENSG00000233360 | ENSG00000128309 |
| ENSG00000279010 | ENSG00000128309 |
| ENSG00000183822 | ENSG00000128311 |
| ENSG00000244627 | ENSG00000128346 |
| ENSG00000279010 | ENSG00000128346 |
| ENSG00000279738 | ENSG00000128346 |
| ENSG00000244627 | ENSG00000128383 |
| ENSG00000279010 | ENSG00000128383 |
| ENSG00000233739 | ENSG00000128394 |
| ENSG00000244627 | ENSG00000128394 |
| ENSG00000224897 | ENSG00000128513 |
| ENSG00000224899 | ENSG00000128513 |
| ENSG00000242593 | ENSG00000128513 |
| ENSG00000078319 | ENSG00000128564 |
| ENSG00000226380 | ENSG00000128585 |
| ENSG00000231721 | ENSG00000128585 |
| ENSG00000233559 | ENSG00000128585 |
| ENSG00000236753 | ENSG00000128585 |
| ENSG00000230626 | ENSG00000128591 |
| ENSG00000243302 | ENSG00000128591 |
| ENSG00000280828 | ENSG00000128591 |
| ENSG00000240758 | ENSG00000128595 |
| ENSG00000272899 | ENSG00000128595 |
| ENSG00000280828 | ENSG00000128595 |
| ENSG00000240571 | ENSG00000128602 |
| ENSG00000243302 | ENSG00000128602 |
| ENSG00000272899 | ENSG00000128602 |
| ENSG00000226380 | ENSG00000128607 |

|                 |                 |
|-----------------|-----------------|
| ENSG00000231721 | ENSG00000128607 |
| ENSG00000232716 | ENSG00000128607 |
| ENSG00000233559 | ENSG00000128607 |
| ENSG00000242593 | ENSG00000128609 |
| ENSG00000272686 | ENSG00000128609 |
| ENSG00000230626 | ENSG00000128617 |
| ENSG00000273270 | ENSG00000128617 |
| ENSG00000227542 | ENSG00000128641 |
| ENSG00000206149 | ENSG00000128731 |
| ENSG00000248334 | ENSG00000128731 |
| ENSG00000224078 | ENSG00000128739 |
| ENSG00000259905 | ENSG00000128739 |
| ENSG00000226576 | ENSG00000128815 |
| ENSG00000248508 | ENSG00000128829 |
| ENSG00000259345 | ENSG00000128829 |
| ENSG00000258461 | ENSG00000128881 |
| ENSG00000259536 | ENSG00000128891 |
| ENSG00000157021 | ENSG00000128908 |
| ENSG00000261183 | ENSG00000128928 |
| ENSG00000260469 | ENSG00000129009 |
| ENSG00000277749 | ENSG00000129009 |
| ENSG00000242337 | ENSG00000129055 |
| ENSG00000248980 | ENSG00000129128 |
| ENSG00000254966 | ENSG00000129167 |
| ENSG00000177822 | ENSG00000129187 |
| ENSG00000215067 | ENSG00000129195 |
| ENSG00000256806 | ENSG00000129195 |
| ENSG00000235085 | ENSG00000129197 |
| ENSG00000263272 | ENSG00000129197 |
| ENSG00000261879 | ENSG00000129204 |
| ENSG00000215067 | ENSG00000129214 |
| ENSG00000256806 | ENSG00000129214 |
| ENSG00000261879 | ENSG00000129219 |
| ENSG00000215067 | ENSG00000129244 |
| ENSG00000256806 | ENSG00000129244 |
| ENSG00000215067 | ENSG00000129245 |
| ENSG00000256806 | ENSG00000129245 |
| ENSG00000265749 | ENSG00000129245 |
| ENSG00000261879 | ENSG00000129250 |
| ENSG00000215067 | ENSG00000129255 |
| ENSG00000256806 | ENSG00000129255 |
| ENSG00000257735 | ENSG00000129315 |
| ENSG00000269514 | ENSG00000129315 |
| ENSG00000266936 | ENSG00000129351 |
| ENSG00000266978 | ENSG00000129351 |
| ENSG00000266978 | ENSG00000129355 |
| ENSG00000267984 | ENSG00000129450 |
| ENSG00000269235 | ENSG00000129450 |



|                 |                 |
|-----------------|-----------------|
| ENSG00000215256 | ENSG00000129465 |
| ENSG00000157306 | ENSG00000129467 |
| ENSG00000258441 | ENSG00000129472 |
| ENSG00000259102 | ENSG00000129472 |
| ENSG00000157306 | ENSG00000129473 |
| ENSG00000215256 | ENSG00000129473 |
| ENSG00000251002 | ENSG00000129473 |
| ENSG00000275552 | ENSG00000129473 |
| ENSG00000157306 | ENSG00000129474 |
| ENSG00000251002 | ENSG00000129474 |
| ENSG00000258458 | ENSG00000129474 |
| ENSG00000258580 | ENSG00000129480 |
| ENSG00000215256 | ENSG00000129535 |
| ENSG00000260669 | ENSG00000129535 |
| ENSG00000258441 | ENSG00000129538 |
| ENSG00000258451 | ENSG00000129538 |
| ENSG00000248445 | ENSG00000129596 |
| ENSG00000270067 | ENSG00000129625 |
| ENSG00000267078 | ENSG00000129646 |
| ENSG00000267546 | ENSG00000129646 |
| ENSG00000253161 | ENSG00000129691 |
| ENSG00000261526 | ENSG00000129911 |
| ENSG00000236829 | ENSG00000129925 |
| ENSG00000267551 | ENSG00000129932 |
| ENSG00000266904 | ENSG00000129933 |
| ENSG00000266933 | ENSG00000129946 |
| ENSG00000267265 | ENSG00000129991 |
| ENSG00000267577 | ENSG00000129991 |
| ENSG00000276570 | ENSG00000129991 |
| ENSG00000248015 | ENSG00000130005 |
| ENSG00000226445 | ENSG00000130024 |
| ENSG00000227704 | ENSG00000130024 |
| ENSG00000272848 | ENSG00000130024 |
| ENSG00000219665 | ENSG00000130158 |
| ENSG00000267082 | ENSG00000130158 |
| ENSG00000219665 | ENSG00000130159 |
| ENSG00000266978 | ENSG00000130164 |
| ENSG00000267274 | ENSG00000130165 |
| ENSG00000234773 | ENSG00000130173 |
| ENSG00000266978 | ENSG00000130173 |
| ENSG00000267082 | ENSG00000130173 |
| ENSG00000267082 | ENSG00000130175 |
| ENSG00000266903 | ENSG00000130202 |
| ENSG00000266903 | ENSG00000130203 |
| ENSG00000267282 | ENSG00000130203 |
| ENSG00000214855 | ENSG00000130204 |
| ENSG00000266903 | ENSG00000130204 |
| ENSG00000267348 | ENSG00000130204 |

|                 |                 |
|-----------------|-----------------|
| ENSG00000266903 | ENSG00000130208 |
| ENSG00000267348 | ENSG00000130208 |
| ENSG00000271826 | ENSG00000130224 |
| ENSG00000253125 | ENSG00000130227 |
| ENSG00000266983 | ENSG00000130254 |
| ENSG00000269802 | ENSG00000130254 |
| ENSG00000268087 | ENSG00000130299 |
| ENSG00000269439 | ENSG00000130303 |
| ENSG00000269481 | ENSG00000130303 |
| ENSG00000269439 | ENSG00000130304 |
| ENSG00000268056 | ENSG00000130307 |
| ENSG00000273654 | ENSG00000130307 |
| ENSG00000273654 | ENSG00000130309 |
| ENSG00000268087 | ENSG00000130313 |
| ENSG00000269439 | ENSG00000130313 |
| ENSG00000273654 | ENSG00000130313 |
| ENSG00000271913 | ENSG00000130338 |
| ENSG00000271913 | ENSG00000130363 |
| ENSG00000269191 | ENSG00000130477 |
| ENSG00000273654 | ENSG00000130477 |
| ENSG00000268112 | ENSG00000130479 |
| ENSG00000273253 | ENSG00000130489 |
| ENSG00000273654 | ENSG00000130511 |
| ENSG00000269439 | ENSG00000130522 |
| ENSG00000232871 | ENSG00000130529 |
| ENSG00000235191 | ENSG00000130529 |
| ENSG00000232442 | ENSG00000130589 |
| ENSG00000226416 | ENSG00000130592 |
| ENSG00000233930 | ENSG00000130592 |
| ENSG00000238184 | ENSG00000130592 |
| ENSG00000269821 | ENSG00000130592 |
| ENSG00000225361 | ENSG00000130635 |
| ENSG00000197182 | ENSG00000130638 |
| ENSG00000280383 | ENSG00000130638 |
| ENSG00000214279 | ENSG00000130640 |
| ENSG00000213742 | ENSG00000130684 |
| ENSG00000230289 | ENSG00000130714 |
| ENSG00000213753 | ENSG00000130724 |
| ENSG00000267858 | ENSG00000130724 |
| ENSG00000268516 | ENSG00000130724 |
| ENSG00000213753 | ENSG00000130725 |
| ENSG00000268201 | ENSG00000130725 |
| ENSG00000268230 | ENSG00000130725 |
| ENSG00000268516 | ENSG00000130725 |
| ENSG00000268895 | ENSG00000130725 |
| ENSG00000269473 | ENSG00000130725 |
| ENSG00000213753 | ENSG00000130726 |
| ENSG00000232098 | ENSG00000130726 |

|                 |                 |
|-----------------|-----------------|
| ENSG00000268516 | ENSG00000130726 |
| ENSG00000266978 | ENSG00000130733 |
| ENSG00000266978 | ENSG00000130734 |
| ENSG00000268621 | ENSG00000130748 |
| ENSG00000268810 | ENSG00000130749 |
| ENSG00000205041 | ENSG00000130758 |
| ENSG00000266936 | ENSG00000130810 |
| ENSG00000266978 | ENSG00000130810 |
| ENSG00000274425 | ENSG00000130810 |
| ENSG00000266936 | ENSG00000130811 |
| ENSG00000266978 | ENSG00000130813 |
| ENSG00000232725 | ENSG00000130821 |
| ENSG00000232725 | ENSG00000130822 |
| ENSG00000260081 | ENSG00000130822 |
| ENSG00000197180 | ENSG00000130827 |
| ENSG00000232725 | ENSG00000130827 |
| ENSG00000228986 | ENSG00000130830 |
| ENSG00000242779 | ENSG00000130844 |
| ENSG00000228526 | ENSG00000130939 |
| ENSG00000175611 | ENSG00000130958 |
| ENSG00000225194 | ENSG00000130958 |
| ENSG00000226679 | ENSG00000130962 |
| ENSG00000259977 | ENSG00000130962 |
| ENSG00000215284 | ENSG00000130985 |
| ENSG00000224401 | ENSG00000130985 |
| ENSG00000268592 | ENSG00000131015 |
| ENSG00000281021 | ENSG00000131015 |
| ENSG00000268592 | ENSG00000131023 |
| ENSG00000235081 | ENSG00000131037 |
| ENSG00000267265 | ENSG00000131037 |
| ENSG00000267649 | ENSG00000131037 |
| ENSG00000267689 | ENSG00000131037 |
| ENSG00000228323 | ENSG00000131042 |
| ENSG00000237017 | ENSG00000131042 |
| ENSG00000267265 | ENSG00000131042 |
| ENSG00000267649 | ENSG00000131042 |
| ENSG00000088340 | ENSG00000131043 |
| ENSG00000232907 | ENSG00000131043 |
| ENSG00000260032 | ENSG00000131043 |
| ENSG00000088340 | ENSG00000131051 |
| ENSG00000232907 | ENSG00000131051 |
| ENSG00000230753 | ENSG00000131061 |
| ENSG00000088340 | ENSG00000131067 |
| ENSG00000228265 | ENSG00000131069 |
| ENSG00000235437 | ENSG00000131089 |
| ENSG00000236754 | ENSG00000131100 |
| ENSG00000280007 | ENSG00000131100 |
| ENSG00000196810 | ENSG00000131127 |

|                 |                 |
|-----------------|-----------------|
| ENSG00000222019 | ENSG00000131165 |
| ENSG00000224888 | ENSG00000131165 |
| ENSG00000261373 | ENSG00000131165 |
| ENSG00000278530 | ENSG00000131171 |
| ENSG00000237899 | ENSG00000131236 |
| ENSG00000260920 | ENSG00000131236 |
| ENSG00000281207 | ENSG00000131236 |
| ENSG00000225470 | ENSG00000131263 |
| ENSG00000230590 | ENSG00000131263 |
| ENSG00000270641 | ENSG00000131263 |
| ENSG00000271430 | ENSG00000131263 |
| ENSG00000225733 | ENSG00000131368 |
| ENSG00000249786 | ENSG00000131368 |
| ENSG00000224660 | ENSG00000131381 |
| ENSG00000225733 | ENSG00000131381 |
| ENSG00000249786 | ENSG00000131386 |
| ENSG00000272529 | ENSG00000131386 |
| ENSG00000131401 | ENSG00000131398 |
| ENSG00000273189 | ENSG00000131398 |
| ENSG00000223442 | ENSG00000131435 |
| ENSG00000233937 | ENSG00000131446 |
| ENSG00000245060 | ENSG00000131446 |
| ENSG00000250222 | ENSG00000131446 |
| ENSG00000233937 | ENSG00000131459 |
| ENSG00000245317 | ENSG00000131459 |
| ENSG00000248367 | ENSG00000131459 |
| ENSG00000188825 | ENSG00000131471 |
| ENSG00000197291 | ENSG00000131471 |
| ENSG00000213373 | ENSG00000131471 |
| ENSG00000249637 | ENSG00000131503 |
| ENSG00000272154 | ENSG00000131503 |
| ENSG00000280029 | ENSG00000131503 |
| ENSG00000254099 | ENSG00000131504 |
| ENSG00000272154 | ENSG00000131504 |
| ENSG00000278936 | ENSG00000131504 |
| ENSG00000280029 | ENSG00000131504 |
| ENSG00000249593 | ENSG00000131508 |
| ENSG00000249637 | ENSG00000131508 |
| ENSG00000177757 | ENSG00000131584 |
| ENSG00000268575 | ENSG00000131584 |
| ENSG00000261691 | ENSG00000131634 |
| ENSG00000205913 | ENSG00000131653 |
| ENSG00000262370 | ENSG00000131653 |
| ENSG00000225511 | ENSG00000131669 |
| ENSG00000236717 | ENSG00000131669 |
| ENSG00000214546 | ENSG00000131748 |
| ENSG00000265460 | ENSG00000131748 |
| ENSG00000277182 | ENSG00000131748 |

|                 |                 |
|-----------------|-----------------|
| ENSG00000237188 | ENSG00000131778 |
| ENSG00000278811 | ENSG00000131778 |
| ENSG00000234222 | ENSG00000131779 |
| ENSG00000237188 | ENSG00000131781 |
| ENSG00000278811 | ENSG00000131781 |
| ENSG00000233396 | ENSG00000131788 |
| ENSG00000234222 | ENSG00000131788 |
| ENSG00000237188 | ENSG00000131791 |
| ENSG00000278811 | ENSG00000131791 |
| ENSG00000185596 | ENSG00000131871 |
| ENSG00000259172 | ENSG00000131871 |
| ENSG00000272808 | ENSG00000131871 |
| ENSG00000259583 | ENSG00000131873 |
| ENSG00000270127 | ENSG00000131876 |
| ENSG00000272808 | ENSG00000131876 |
| ENSG00000258413 | ENSG00000131981 |
| ENSG00000267169 | ENSG00000132000 |
| ENSG00000267169 | ENSG00000132002 |
| ENSG00000267169 | ENSG00000132003 |
| ENSG00000267379 | ENSG00000132003 |
| ENSG00000267062 | ENSG00000132004 |
| ENSG00000267169 | ENSG00000132005 |
| ENSG00000234773 | ENSG00000132010 |
| ENSG00000267274 | ENSG00000132010 |
| ENSG00000236204 | ENSG00000132031 |
| ENSG00000255367 | ENSG00000132109 |
| ENSG00000232022 | ENSG00000132128 |
| ENSG00000227252 | ENSG00000132330 |
| ENSG00000223528 | ENSG00000132334 |
| ENSG00000262903 | ENSG00000132359 |
| ENSG00000263345 | ENSG00000132359 |
| ENSG00000231305 | ENSG00000132394 |
| ENSG00000228439 | ENSG00000132423 |
| ENSG00000224057 | ENSG00000132434 |
| ENSG00000163597 | ENSG00000132471 |
| ENSG00000267546 | ENSG00000132471 |
| ENSG00000267342 | ENSG00000132478 |
| ENSG00000163597 | ENSG00000132481 |
| ENSG00000267801 | ENSG00000132481 |
| ENSG00000229956 | ENSG00000132485 |
| ENSG00000256806 | ENSG00000132507 |
| ENSG00000215067 | ENSG00000132510 |
| ENSG00000265749 | ENSG00000132510 |
| ENSG00000215067 | ENSG00000132522 |
| ENSG00000256806 | ENSG00000132522 |
| ENSG00000215067 | ENSG00000132530 |
| ENSG00000256806 | ENSG00000132530 |
| ENSG00000215067 | ENSG00000132535 |

|                 |                 |
|-----------------|-----------------|
| ENSG00000256806 | ENSG00000132535 |
| ENSG00000224186 | ENSG00000132570 |
| ENSG00000273345 | ENSG00000132570 |
| ENSG00000227543 | ENSG00000132581 |
| ENSG00000264031 | ENSG00000132581 |
| ENSG00000263657 | ENSG00000132589 |
| ENSG00000276075 | ENSG00000132600 |
| ENSG00000196696 | ENSG00000132612 |
| ENSG00000196696 | ENSG00000132613 |
| ENSG00000214353 | ENSG00000132613 |
| ENSG00000260111 | ENSG00000132613 |
| ENSG00000235958 | ENSG00000132635 |
| ENSG00000225988 | ENSG00000132639 |
| ENSG00000236526 | ENSG00000132640 |
| ENSG00000233895 | ENSG00000132669 |
| ENSG00000225855 | ENSG00000132676 |
| ENSG00000236947 | ENSG00000132676 |
| ENSG00000246203 | ENSG00000132676 |
| ENSG00000229953 | ENSG00000132677 |
| ENSG00000160766 | ENSG00000132680 |
| ENSG00000229953 | ENSG00000132680 |
| ENSG00000246203 | ENSG00000132680 |
| ENSG00000229953 | ENSG00000132688 |
| ENSG00000272405 | ENSG00000132688 |
| ENSG00000229953 | ENSG00000132692 |
| ENSG00000224259 | ENSG00000132716 |
| ENSG00000228863 | ENSG00000132716 |
| ENSG00000160766 | ENSG00000132718 |
| ENSG00000246203 | ENSG00000132718 |
| ENSG00000272068 | ENSG00000132718 |
| ENSG00000272405 | ENSG00000132718 |
| ENSG00000232022 | ENSG00000132763 |
| ENSG00000224635 | ENSG00000132821 |
| ENSG00000223891 | ENSG00000132823 |
| ENSG00000244558 | ENSG00000132823 |
| ENSG00000223891 | ENSG00000132824 |
| ENSG00000244558 | ENSG00000132824 |
| ENSG00000225407 | ENSG00000132846 |
| ENSG00000250802 | ENSG00000132846 |
| ENSG00000186301 | ENSG00000132881 |
| ENSG00000237276 | ENSG00000132881 |
| ENSG00000268869 | ENSG00000132881 |
| ENSG00000249035 | ENSG00000132912 |
| ENSG00000260581 | ENSG00000132912 |
| ENSG00000179141 | ENSG00000132963 |
| ENSG00000215808 | ENSG00000133019 |
| ENSG00000263388 | ENSG00000133028 |
| ENSG00000263400 | ENSG00000133028 |

|                 |                 |
|-----------------|-----------------|
| ENSG00000264016 | ENSG00000133028 |
| ENSG00000281406 | ENSG00000133065 |
| ENSG00000231871 | ENSG00000133067 |
| ENSG00000120664 | ENSG00000133101 |
| ENSG00000120664 | ENSG00000133104 |
| ENSG00000120664 | ENSG00000133111 |
| ENSG00000170919 | ENSG00000133114 |
| ENSG00000227258 | ENSG00000133114 |
| ENSG00000236581 | ENSG00000133116 |
| ENSG00000236581 | ENSG00000133119 |
| ENSG00000236581 | ENSG00000133121 |
| ENSG00000239407 | ENSG00000133134 |
| ENSG00000270050 | ENSG00000133169 |
| ENSG00000271147 | ENSG00000133169 |
| ENSG00000226101 | ENSG00000133195 |
| ENSG00000227036 | ENSG00000133195 |
| ENSG00000249592 | ENSG00000133256 |
| ENSG00000256116 | ENSG00000133321 |
| ENSG00000250764 | ENSG00000133401 |
| ENSG00000228839 | ENSG00000133422 |
| ENSG00000225282 | ENSG00000133433 |
| ENSG00000183822 | ENSG00000133466 |
| ENSG00000235237 | ENSG00000133466 |
| ENSG00000250318 | ENSG00000133488 |
| ENSG00000240449 | ENSG00000133612 |
| ENSG00000133624 | ENSG00000133619 |
| ENSG00000240449 | ENSG00000133619 |
| ENSG00000245904 | ENSG00000133639 |
| ENSG00000257242 | ENSG00000133639 |
| ENSG00000229334 | ENSG00000133657 |
| ENSG00000231770 | ENSG00000133657 |
| ENSG00000233058 | ENSG00000133657 |
| ENSG00000244675 | ENSG00000133657 |
| ENSG00000225484 | ENSG00000133678 |
| ENSG00000230091 | ENSG00000133678 |
| ENSG00000242600 | ENSG00000133678 |
| ENSG00000251556 | ENSG00000133706 |
| ENSG00000254208 | ENSG00000133739 |
| ENSG00000247271 | ENSG00000133800 |
| ENSG00000255125 | ENSG00000133800 |
| ENSG00000246273 | ENSG00000133812 |
| ENSG00000247271 | ENSG00000133812 |
| ENSG00000251191 | ENSG00000133872 |
| ENSG00000272256 | ENSG00000133872 |
| ENSG00000258875 | ENSG00000133943 |
| ENSG00000253125 | ENSG00000134013 |
| ENSG00000253837 | ENSG00000134013 |
| ENSG00000227115 | ENSG00000134042 |

|                 |                 |
|-----------------|-----------------|
| ENSG00000179978 | ENSG00000134056 |
| ENSG00000248664 | ENSG00000134056 |
| ENSG00000231249 | ENSG00000134109 |
| ENSG00000233912 | ENSG00000134109 |
| ENSG00000235978 | ENSG00000134109 |
| ENSG00000234661 | ENSG00000134121 |
| ENSG00000259287 | ENSG00000134152 |
| ENSG00000228703 | ENSG00000134184 |
| ENSG00000241720 | ENSG00000134184 |
| ENSG00000228703 | ENSG00000134186 |
| ENSG00000241720 | ENSG00000134201 |
| ENSG00000241720 | ENSG00000134202 |
| ENSG00000224167 | ENSG00000134242 |
| ENSG00000226167 | ENSG00000134242 |
| ENSG00000238198 | ENSG00000134242 |
| ENSG00000227963 | ENSG00000134243 |
| ENSG00000224167 | ENSG00000134245 |
| ENSG00000203865 | ENSG00000134247 |
| ENSG00000187481 | ENSG00000134250 |
| ENSG00000203855 | ENSG00000134250 |
| ENSG00000227082 | ENSG00000134250 |
| ENSG00000227712 | ENSG00000134250 |
| ENSG00000231365 | ENSG00000134250 |
| ENSG00000224699 | ENSG00000134255 |
| ENSG00000235407 | ENSG00000134255 |
| ENSG00000240194 | ENSG00000134255 |
| ENSG00000224950 | ENSG00000134256 |
| ENSG00000236137 | ENSG00000134256 |
| ENSG00000267108 | ENSG00000134278 |
| ENSG00000267199 | ENSG00000134278 |
| ENSG00000257735 | ENSG00000134285 |
| ENSG00000257588 | ENSG00000134287 |
| ENSG00000257735 | ENSG00000134287 |
| ENSG00000258017 | ENSG00000134287 |
| ENSG00000258101 | ENSG00000134287 |
| ENSG00000257735 | ENSG00000134291 |
| ENSG00000257261 | ENSG00000134294 |
| ENSG00000235092 | ENSG00000134313 |
| ENSG00000235665 | ENSG00000134313 |
| ENSG00000236790 | ENSG00000134313 |
| ENSG00000228203 | ENSG00000134321 |
| ENSG00000223884 | ENSG00000134326 |
| ENSG00000254966 | ENSG00000134333 |
| ENSG00000248898 | ENSG00000134363 |
| ENSG00000249899 | ENSG00000134363 |
| ENSG00000223396 | ENSG00000134369 |
| ENSG00000231871 | ENSG00000134369 |
| ENSG00000235121 | ENSG00000134369 |



|                 |                 |
|-----------------|-----------------|
| ENSG00000223396 | ENSG00000134375 |
| ENSG00000234678 | ENSG00000134375 |
| ENSG00000243323 | ENSG00000134375 |
| ENSG00000267040 | ENSG00000134440 |
| ENSG00000267787 | ENSG00000134440 |
| ENSG00000215244 | ENSG00000134461 |
| ENSG00000264745 | ENSG00000134508 |
| ENSG00000264825 | ENSG00000134508 |
| ENSG00000247498 | ENSG00000134531 |
| ENSG00000214776 | ENSG00000134539 |
| ENSG00000256673 | ENSG00000134539 |
| ENSG00000256712 | ENSG00000134539 |
| ENSG00000257027 | ENSG00000134539 |
| ENSG00000247675 | ENSG00000134569 |
| ENSG00000247675 | ENSG00000134574 |
| ENSG00000255197 | ENSG00000134574 |
| ENSG00000223749 | ENSG00000134590 |
| ENSG00000232160 | ENSG00000134602 |
| ENSG00000255929 | ENSG00000134627 |
| ENSG00000235790 | ENSG00000134668 |
| ENSG00000225313 | ENSG00000134684 |
| ENSG00000225313 | ENSG00000134686 |
| ENSG00000266993 | ENSG00000134717 |
| ENSG00000223390 | ENSG00000134744 |
| ENSG00000227742 | ENSG00000134748 |
| ENSG00000260552 | ENSG00000134759 |
| ENSG00000274184 | ENSG00000134759 |
| ENSG00000268573 | ENSG00000134769 |
| ENSG00000268873 | ENSG00000134769 |
| ENSG00000243742 | ENSG00000134780 |
| ENSG00000243742 | ENSG00000134824 |
| ENSG00000249700 | ENSG00000134851 |
| ENSG00000249341 | ENSG00000134853 |
| ENSG00000227105 | ENSG00000134871 |
| ENSG00000255874 | ENSG00000134871 |
| ENSG00000275741 | ENSG00000134905 |
| ENSG00000257271 | ENSG00000134910 |
| ENSG00000248445 | ENSG00000134970 |
| ENSG00000249249 | ENSG00000134970 |
| ENSG00000246859 | ENSG00000134986 |
| ENSG00000246859 | ENSG00000134987 |
| ENSG00000225434 | ENSG00000135046 |
| ENSG00000226237 | ENSG00000135047 |
| ENSG00000234424 | ENSG00000135049 |
| ENSG00000226237 | ENSG00000135070 |
| ENSG00000258285 | ENSG00000135108 |
| ENSG00000212694 | ENSG00000135114 |
| ENSG00000249550 | ENSG00000135144 |

|                 |                 |
|-----------------|-----------------|
| ENSG00000230626 | ENSG00000135245 |
| ENSG00000280828 | ENSG00000135245 |
| ENSG00000281896 | ENSG00000135245 |
| ENSG00000197258 | ENSG00000135250 |
| ENSG00000228393 | ENSG00000135250 |
| ENSG00000237513 | ENSG00000135250 |
| ENSG00000272918 | ENSG00000135250 |
| ENSG00000272899 | ENSG00000135253 |
| ENSG00000273270 | ENSG00000135253 |
| ENSG00000280828 | ENSG00000135253 |
| ENSG00000226367 | ENSG00000135269 |
| ENSG00000243243 | ENSG00000135269 |
| ENSG00000225535 | ENSG00000135272 |
| ENSG00000229862 | ENSG00000135297 |
| ENSG00000217060 | ENSG00000135316 |
| ENSG00000183242 | ENSG00000135378 |
| ENSG00000255252 | ENSG00000135378 |
| ENSG00000182796 | ENSG00000135392 |
| ENSG00000257809 | ENSG00000135392 |
| ENSG00000248265 | ENSG00000135409 |
| ENSG00000250742 | ENSG00000135409 |
| ENSG00000257337 | ENSG00000135409 |
| ENSG00000257913 | ENSG00000135436 |
| ENSG00000258057 | ENSG00000135436 |
| ENSG00000258101 | ENSG00000135436 |
| ENSG00000257342 | ENSG00000135439 |
| ENSG00000257342 | ENSG00000135446 |
| ENSG00000248265 | ENSG00000135447 |
| ENSG00000258086 | ENSG00000135447 |
| ENSG00000260470 | ENSG00000135447 |
| ENSG00000259125 | ENSG00000135452 |
| ENSG00000224713 | ENSG00000135454 |
| ENSG00000257342 | ENSG00000135454 |
| ENSG00000259125 | ENSG00000135454 |
| ENSG00000259125 | ENSG00000135469 |
| ENSG00000258199 | ENSG00000135482 |
| ENSG00000224713 | ENSG00000135502 |
| ENSG00000257342 | ENSG00000135502 |
| ENSG00000257342 | ENSG00000135506 |
| ENSG00000219565 | ENSG00000135537 |
| ENSG00000272476 | ENSG00000135537 |
| ENSG00000231028 | ENSG00000135541 |
| ENSG00000234084 | ENSG00000135541 |
| ENSG00000163016 | ENSG00000135624 |
| ENSG00000272702 | ENSG00000135624 |
| ENSG00000225439 | ENSG00000135625 |
| ENSG00000163016 | ENSG00000135631 |
| ENSG00000163016 | ENSG00000135637 |

|                 |                 |
|-----------------|-----------------|
| ENSG00000257354 | ENSG00000135655 |
| ENSG00000243024 | ENSG00000135677 |
| ENSG00000250748 | ENSG00000135677 |
| ENSG00000247131 | ENSG00000135679 |
| ENSG00000257181 | ENSG00000135679 |
| ENSG00000261519 | ENSG00000135723 |
| ENSG00000270049 | ENSG00000135723 |
| ENSG00000276075 | ENSG00000135723 |
| ENSG00000276075 | ENSG00000135740 |
| ENSG00000177788 | ENSG00000135763 |
| ENSG00000183929 | ENSG00000135776 |
| ENSG00000224407 | ENSG00000135776 |
| ENSG00000232586 | ENSG00000135835 |
| ENSG00000243155 | ENSG00000135835 |
| ENSG00000232586 | ENSG00000135837 |
| ENSG00000243155 | ENSG00000135837 |
| ENSG00000236432 | ENSG00000135917 |
| ENSG00000229754 | ENSG00000135929 |
| ENSG00000237126 | ENSG00000135930 |
| ENSG00000225963 | ENSG00000135932 |
| ENSG00000281162 | ENSG00000135953 |
| ENSG00000204685 | ENSG00000135956 |
| ENSG00000197927 | ENSG00000136002 |
| ENSG00000246985 | ENSG00000136040 |
| ENSG00000257283 | ENSG00000136040 |
| ENSG00000257999 | ENSG00000136051 |
| ENSG00000235257 | ENSG00000136059 |
| ENSG00000242428 | ENSG00000136068 |
| ENSG00000244161 | ENSG00000136068 |
| ENSG00000244383 | ENSG00000136068 |
| ENSG00000236778 | ENSG00000136098 |
| ENSG00000243406 | ENSG00000136098 |
| ENSG00000281106 | ENSG00000136098 |
| ENSG00000236778 | ENSG00000136100 |
| ENSG00000250299 | ENSG00000136100 |
| ENSG00000233672 | ENSG00000136104 |
| ENSG00000261553 | ENSG00000136111 |
| ENSG00000260388 | ENSG00000136143 |
| ENSG00000235903 | ENSG00000136152 |
| ENSG00000170919 | ENSG00000136167 |
| ENSG00000235903 | ENSG00000136167 |
| ENSG00000225264 | ENSG00000136193 |
| ENSG00000227014 | ENSG00000136193 |
| ENSG00000227855 | ENSG00000136193 |
| ENSG00000281404 | ENSG00000136193 |
| ENSG00000214783 | ENSG00000136206 |
| ENSG00000272655 | ENSG00000136206 |
| ENSG00000273432 | ENSG00000136206 |

|                 |                 |
|-----------------|-----------------|
| ENSG00000214783 | ENSG00000136271 |
| ENSG00000273432 | ENSG00000136271 |
| ENSG00000225705 | ENSG00000136273 |
| ENSG00000232956 | ENSG00000136274 |
| ENSG00000272556 | ENSG00000136274 |
| ENSG00000272768 | ENSG00000136274 |
| ENSG00000214783 | ENSG00000136279 |
| ENSG00000228903 | ENSG00000136279 |
| ENSG00000235314 | ENSG00000136279 |
| ENSG00000272655 | ENSG00000136279 |
| ENSG00000273432 | ENSG00000136279 |
| ENSG00000214765 | ENSG00000136280 |
| ENSG00000228903 | ENSG00000136280 |
| ENSG00000232956 | ENSG00000136280 |
| ENSG00000272556 | ENSG00000136280 |
| ENSG00000214765 | ENSG00000136286 |
| ENSG00000272556 | ENSG00000136286 |
| ENSG00000236708 | ENSG00000136295 |
| ENSG00000157306 | ENSG00000136305 |
| ENSG00000215256 | ENSG00000136305 |
| ENSG00000157306 | ENSG00000136367 |
| ENSG00000215256 | ENSG00000136367 |
| ENSG00000259234 | ENSG00000136371 |
| ENSG00000259495 | ENSG00000136371 |
| ENSG00000259642 | ENSG00000136371 |
| ENSG00000278600 | ENSG00000136371 |
| ENSG00000259234 | ENSG00000136378 |
| ENSG00000260776 | ENSG00000136378 |
| ENSG00000259234 | ENSG00000136381 |
| ENSG00000260776 | ENSG00000136381 |
| ENSG00000261143 | ENSG00000136381 |
| ENSG00000189136 | ENSG00000136383 |
| ENSG00000225151 | ENSG00000136383 |
| ENSG00000235370 | ENSG00000136383 |
| ENSG00000230532 | ENSG00000136436 |
| ENSG00000275897 | ENSG00000136444 |
| ENSG00000224505 | ENSG00000136448 |
| ENSG00000251239 | ENSG00000136449 |
| ENSG00000265148 | ENSG00000136450 |
| ENSG00000265542 | ENSG00000136451 |
| ENSG00000275897 | ENSG00000136457 |
| ENSG00000265702 | ENSG00000136463 |
| ENSG00000233635 | ENSG00000136490 |
| ENSG00000263644 | ENSG00000136490 |
| ENSG00000265702 | ENSG00000136490 |
| ENSG00000197099 | ENSG00000136514 |
| ENSG00000197099 | ENSG00000136527 |
| ENSG00000223642 | ENSG00000136536 |

|                 |                 |
|-----------------|-----------------|
| ENSG00000226266 | ENSG00000136536 |
| ENSG00000227403 | ENSG00000136560 |
| ENSG00000235724 | ENSG00000136560 |
| ENSG00000248896 | ENSG00000136574 |
| ENSG00000255052 | ENSG00000136574 |
| ENSG00000269889 | ENSG00000136603 |
| ENSG00000237781 | ENSG00000136631 |
| ENSG00000230461 | ENSG00000136643 |
| ENSG00000189223 | ENSG00000136682 |
| ENSG00000240356 | ENSG00000136682 |
| ENSG00000243389 | ENSG00000136682 |
| ENSG00000189223 | ENSG00000136689 |
| ENSG00000240356 | ENSG00000136689 |
| ENSG00000178162 | ENSG00000136710 |
| ENSG00000230646 | ENSG00000136710 |
| ENSG00000272667 | ENSG00000136720 |
| ENSG00000204054 | ENSG00000136802 |
| ENSG00000228395 | ENSG00000136807 |
| ENSG00000257524 | ENSG00000136807 |
| ENSG00000204055 | ENSG00000136816 |
| ENSG00000232850 | ENSG00000136830 |
| ENSG00000257524 | ENSG00000136830 |
| ENSG00000257524 | ENSG00000136840 |
| ENSG00000257524 | ENSG00000136859 |
| ENSG00000226752 | ENSG00000136861 |
| ENSG00000228623 | ENSG00000136866 |
| ENSG00000228623 | ENSG00000136867 |
| ENSG00000230185 | ENSG00000136867 |
| ENSG00000228623 | ENSG00000136868 |
| ENSG00000257524 | ENSG00000136877 |
| ENSG00000237461 | ENSG00000136891 |
| ENSG00000249859 | ENSG00000136997 |
| ENSG00000228352 | ENSG00000137070 |
| ENSG00000230074 | ENSG00000137070 |
| ENSG00000261215 | ENSG00000137070 |
| ENSG00000226562 | ENSG00000137073 |
| ENSG00000235481 | ENSG00000137073 |
| ENSG00000226562 | ENSG00000137074 |
| ENSG00000227388 | ENSG00000137094 |
| ENSG00000228352 | ENSG00000137094 |
| ENSG00000227388 | ENSG00000137098 |
| ENSG00000227388 | ENSG00000137103 |
| ENSG00000227388 | ENSG00000137133 |
| ENSG00000235387 | ENSG00000137133 |
| ENSG00000245261 | ENSG00000137161 |
| ENSG00000237686 | ENSG00000137171 |
| ENSG00000261068 | ENSG00000137171 |
| ENSG00000237686 | ENSG00000137207 |

|                 |                 |
|-----------------|-----------------|
| ENSG00000237686 | ENSG00000137216 |
| ENSG00000228170 | ENSG00000137267 |
| ENSG00000250903 | ENSG00000137267 |
| ENSG00000228170 | ENSG00000137274 |
| ENSG00000250903 | ENSG00000137275 |
| ENSG00000272277 | ENSG00000137275 |
| ENSG00000228170 | ENSG00000137285 |
| ENSG00000250903 | ENSG00000137285 |
| ENSG00000206337 | ENSG00000137310 |
| ENSG00000181126 | ENSG00000137312 |
| ENSG00000206337 | ENSG00000137312 |
| ENSG00000214894 | ENSG00000137312 |
| ENSG00000224328 | ENSG00000137312 |
| ENSG00000270604 | ENSG00000137312 |
| ENSG00000271821 | ENSG00000137312 |
| ENSG00000206337 | ENSG00000137331 |
| ENSG00000214894 | ENSG00000137331 |
| ENSG00000270604 | ENSG00000137331 |
| ENSG00000271581 | ENSG00000137331 |
| ENSG00000206337 | ENSG00000137337 |
| ENSG00000227766 | ENSG00000137337 |
| ENSG00000230795 | ENSG00000137337 |
| ENSG00000233902 | ENSG00000137337 |
| ENSG00000226314 | ENSG00000137338 |
| ENSG00000269293 | ENSG00000137338 |
| ENSG00000206337 | ENSG00000137343 |
| ENSG00000206341 | ENSG00000137343 |
| ENSG00000214922 | ENSG00000137343 |
| ENSG00000270604 | ENSG00000137343 |
| ENSG00000206337 | ENSG00000137404 |
| ENSG00000214894 | ENSG00000137404 |
| ENSG00000270604 | ENSG00000137404 |
| ENSG00000214894 | ENSG00000137411 |
| ENSG00000256007 | ENSG00000137478 |
| ENSG00000260401 | ENSG00000137478 |
| ENSG00000254963 | ENSG00000137486 |
| ENSG00000241170 | ENSG00000137491 |
| ENSG00000255234 | ENSG00000137500 |
| ENSG00000255234 | ENSG00000137509 |
| ENSG00000245148 | ENSG00000137522 |
| ENSG00000255248 | ENSG00000137642 |
| ENSG00000282728 | ENSG00000137672 |
| ENSG00000282728 | ENSG00000137693 |
| ENSG00000254416 | ENSG00000137710 |
| ENSG00000196167 | ENSG00000137714 |
| ENSG00000254416 | ENSG00000137714 |
| ENSG00000255422 | ENSG00000137726 |
| ENSG00000254416 | ENSG00000137727 |

|                 |                 |
|-----------------|-----------------|
| ENSG00000278768 | ENSG00000137747 |
| ENSG00000259479 | ENSG00000137770 |
| ENSG00000259539 | ENSG00000137770 |
| ENSG00000259771 | ENSG00000137776 |
| ENSG00000259345 | ENSG00000137801 |
| ENSG00000258461 | ENSG00000137814 |
| ENSG00000261822 | ENSG00000137814 |
| ENSG00000261460 | ENSG00000137817 |
| ENSG00000248508 | ENSG00000137841 |
| ENSG00000205771 | ENSG00000137842 |
| ENSG00000258461 | ENSG00000137842 |
| ENSG00000259250 | ENSG00000137845 |
| ENSG00000259479 | ENSG00000137857 |
| ENSG00000259539 | ENSG00000137857 |
| ENSG00000259327 | ENSG00000137869 |
| ENSG00000223745 | ENSG00000137936 |
| ENSG00000224081 | ENSG00000137936 |
| ENSG00000224093 | ENSG00000137936 |
| ENSG00000260464 | ENSG00000137936 |
| ENSG00000240520 | ENSG00000137941 |
| ENSG00000237505 | ENSG00000137944 |
| ENSG00000235927 | ENSG00000137965 |
| ENSG00000233184 | ENSG00000137992 |
| ENSG00000224616 | ENSG00000137996 |
| ENSG00000231367 | ENSG00000138061 |
| ENSG00000232973 | ENSG00000138061 |
| ENSG00000235848 | ENSG00000138061 |
| ENSG00000236213 | ENSG00000138061 |
| ENSG00000172974 | ENSG00000138069 |
| ENSG00000234072 | ENSG00000138073 |
| ENSG00000214465 | ENSG00000138080 |
| ENSG00000225850 | ENSG00000138131 |
| ENSG00000196566 | ENSG00000138138 |
| ENSG00000223482 | ENSG00000138138 |
| ENSG00000225913 | ENSG00000138138 |
| ENSG00000226688 | ENSG00000138185 |
| ENSG00000244578 | ENSG00000138231 |
| ENSG00000227542 | ENSG00000138378 |
| ENSG00000231858 | ENSG00000138378 |
| ENSG00000228509 | ENSG00000138386 |
| ENSG00000229056 | ENSG00000138411 |
| ENSG00000224063 | ENSG00000138448 |
| ENSG00000227227 | ENSG00000138448 |
| ENSG00000242622 | ENSG00000138495 |
| ENSG00000259678 | ENSG00000138594 |
| ENSG00000259709 | ENSG00000138594 |
| ENSG00000259479 | ENSG00000138606 |
| ENSG00000259539 | ENSG00000138606 |

|                 |                 |
|-----------------|-----------------|
| ENSG00000259595 | ENSG00000138606 |
| ENSG00000260266 | ENSG00000138623 |
| ENSG00000271474 | ENSG00000138696 |
| ENSG00000246090 | ENSG00000138698 |
| ENSG00000260641 | ENSG00000138698 |
| ENSG00000245958 | ENSG00000138735 |
| ENSG00000250412 | ENSG00000138735 |
| ENSG00000251442 | ENSG00000138756 |
| ENSG00000249717 | ENSG00000138757 |
| ENSG00000251442 | ENSG00000138759 |
| ENSG00000245293 | ENSG00000138796 |
| ENSG00000247950 | ENSG00000138802 |
| ENSG00000248161 | ENSG00000138821 |
| ENSG00000245322 | ENSG00000138823 |
| ENSG00000246090 | ENSG00000138823 |
| ENSG00000248676 | ENSG00000138823 |
| ENSG00000260807 | ENSG00000138834 |
| ENSG00000228623 | ENSG00000138835 |
| ENSG00000228839 | ENSG00000138942 |
| ENSG00000226210 | ENSG00000139044 |
| ENSG00000214776 | ENSG00000139112 |
| ENSG00000214826 | ENSG00000139112 |
| ENSG00000245648 | ENSG00000139112 |
| ENSG00000256069 | ENSG00000139112 |
| ENSG00000225342 | ENSG00000139116 |
| ENSG00000226472 | ENSG00000139146 |
| ENSG00000255867 | ENSG00000139146 |
| ENSG00000253284 | ENSG00000139154 |
| ENSG00000215039 | ENSG00000139178 |
| ENSG00000256433 | ENSG00000139178 |
| ENSG00000205885 | ENSG00000139182 |
| ENSG00000215039 | ENSG00000139182 |
| ENSG00000205885 | ENSG00000139190 |
| ENSG00000205885 | ENSG00000139193 |
| ENSG00000215039 | ENSG00000139193 |
| ENSG00000219410 | ENSG00000139193 |
| ENSG00000205885 | ENSG00000139194 |
| ENSG00000257261 | ENSG00000139209 |
| ENSG00000257261 | ENSG00000139211 |
| ENSG00000257261 | ENSG00000139218 |
| ENSG00000257735 | ENSG00000139219 |
| ENSG00000197301 | ENSG00000139233 |
| ENSG00000241749 | ENSG00000139233 |
| ENSG00000250748 | ENSG00000139233 |
| ENSG00000256248 | ENSG00000139233 |
| ENSG00000257342 | ENSG00000139266 |
| ENSG00000258302 | ENSG00000139318 |
| ENSG00000257242 | ENSG00000139329 |



|                 |                 |
|-----------------|-----------------|
| ENSG00000257732 | ENSG00000139372 |
| ENSG00000257286 | ENSG00000139405 |
| ENSG00000249550 | ENSG00000139410 |
| ENSG00000255650 | ENSG00000139428 |
| ENSG00000275294 | ENSG00000139517 |
| ENSG00000257809 | ENSG00000139540 |
| ENSG00000248265 | ENSG00000139546 |
| ENSG00000258086 | ENSG00000139546 |
| ENSG00000257735 | ENSG00000139549 |
| ENSG00000258283 | ENSG00000139549 |
| ENSG00000248265 | ENSG00000139572 |
| ENSG00000250451 | ENSG00000139572 |
| ENSG00000250742 | ENSG00000139572 |
| ENSG00000258086 | ENSG00000139572 |
| ENSG00000236581 | ENSG00000139597 |
| ENSG00000272368 | ENSG00000139624 |
| ENSG00000248265 | ENSG00000139625 |
| ENSG00000250742 | ENSG00000139625 |
| ENSG00000257337 | ENSG00000139625 |
| ENSG00000258086 | ENSG00000139625 |
| ENSG00000248265 | ENSG00000139626 |
| ENSG00000248265 | ENSG00000139631 |
| ENSG00000257337 | ENSG00000139631 |
| ENSG00000257790 | ENSG00000139631 |
| ENSG00000257346 | ENSG00000139636 |
| ENSG00000257588 | ENSG00000139636 |
| ENSG00000257735 | ENSG00000139636 |
| ENSG00000258017 | ENSG00000139636 |
| ENSG00000258283 | ENSG00000139636 |
| ENSG00000248265 | ENSG00000139637 |
| ENSG00000250451 | ENSG00000139637 |
| ENSG00000250742 | ENSG00000139637 |
| ENSG00000257616 | ENSG00000139637 |
| ENSG00000258554 | ENSG00000139641 |
| ENSG00000258101 | ENSG00000139644 |
| ENSG00000272368 | ENSG00000139644 |
| ENSG00000248265 | ENSG00000139651 |
| ENSG00000257790 | ENSG00000139651 |
| ENSG00000257808 | ENSG00000139651 |
| ENSG00000233672 | ENSG00000139668 |
| ENSG00000236778 | ENSG00000139668 |
| ENSG00000281106 | ENSG00000139668 |
| ENSG00000275202 | ENSG00000139679 |
| ENSG00000256249 | ENSG00000139718 |
| ENSG00000256249 | ENSG00000139719 |
| ENSG00000212694 | ENSG00000139725 |
| ENSG00000256249 | ENSG00000139725 |
| ENSG00000272849 | ENSG00000139725 |

|                 |                 |
|-----------------|-----------------|
| ENSG00000274292 | ENSG00000139725 |
| ENSG00000212694 | ENSG00000139726 |
| ENSG00000235423 | ENSG00000139726 |
| ENSG00000256249 | ENSG00000139726 |
| ENSG00000272849 | ENSG00000139726 |
| ENSG00000236242 | ENSG00000139826 |
| ENSG00000233695 | ENSG00000139842 |
| ENSG00000260910 | ENSG00000139842 |
| ENSG00000157306 | ENSG00000139880 |
| ENSG00000215256 | ENSG00000139880 |
| ENSG00000251002 | ENSG00000139880 |
| ENSG00000251002 | ENSG00000139890 |
| ENSG00000157306 | ENSG00000139908 |
| ENSG00000276698 | ENSG00000139908 |
| ENSG00000259868 | ENSG00000139946 |
| ENSG00000258867 | ENSG00000140030 |
| ENSG00000258891 | ENSG00000140043 |
| ENSG00000259065 | ENSG00000140043 |
| ENSG00000227051 | ENSG00000140057 |
| ENSG00000214548 | ENSG00000140105 |
| ENSG00000223403 | ENSG00000140105 |
| ENSG00000247970 | ENSG00000140105 |
| ENSG00000258663 | ENSG00000140105 |
| ENSG00000258666 | ENSG00000140105 |
| ENSG00000276172 | ENSG00000140157 |
| ENSG00000179523 | ENSG00000140254 |
| ENSG00000259479 | ENSG00000140254 |
| ENSG00000259539 | ENSG00000140254 |
| ENSG00000259479 | ENSG00000140263 |
| ENSG00000259659 | ENSG00000140263 |
| ENSG00000259479 | ENSG00000140274 |
| ENSG00000259539 | ENSG00000140274 |
| ENSG00000259352 | ENSG00000140279 |
| ENSG00000259479 | ENSG00000140279 |
| ENSG00000259539 | ENSG00000140279 |
| ENSG00000259678 | ENSG00000140280 |
| ENSG00000259656 | ENSG00000140285 |
| ENSG00000259705 | ENSG00000140285 |
| ENSG00000259238 | ENSG00000140299 |
| ENSG00000259211 | ENSG00000140320 |
| ENSG00000259536 | ENSG00000140320 |
| ENSG00000259345 | ENSG00000140323 |
| ENSG00000258461 | ENSG00000140326 |
| ENSG00000278769 | ENSG00000140326 |
| ENSG00000259175 | ENSG00000140379 |
| ENSG00000259234 | ENSG00000140379 |
| ENSG00000259495 | ENSG00000140379 |
| ENSG00000260776 | ENSG00000140391 |

|                 |                 |
|-----------------|-----------------|
| ENSG00000261143 | ENSG00000140391 |
| ENSG00000246877 | ENSG00000140398 |
| ENSG00000260266 | ENSG00000140398 |
| ENSG00000260269 | ENSG00000140398 |
| ENSG00000260269 | ENSG00000140400 |
| ENSG00000259234 | ENSG00000140403 |
| ENSG00000259562 | ENSG00000140403 |
| ENSG00000261143 | ENSG00000140403 |
| ENSG00000259175 | ENSG00000140406 |
| ENSG00000259495 | ENSG00000140406 |
| ENSG00000259475 | ENSG00000140443 |
| ENSG00000261821 | ENSG00000140459 |
| ENSG00000259205 | ENSG00000140471 |
| ENSG00000259540 | ENSG00000140471 |
| ENSG00000260269 | ENSG00000140474 |
| ENSG00000259205 | ENSG00000140479 |
| ENSG00000259660 | ENSG00000140479 |
| ENSG00000270127 | ENSG00000140479 |
| ENSG00000272808 | ENSG00000140479 |
| ENSG00000255571 | ENSG00000140526 |
| ENSG00000255571 | ENSG00000140545 |
| ENSG00000259736 | ENSG00000140548 |
| ENSG00000224441 | ENSG00000140553 |
| ENSG00000258384 | ENSG00000140553 |
| ENSG00000259736 | ENSG00000140575 |
| ENSG00000259314 | ENSG00000140577 |
| ENSG00000259736 | ENSG00000140577 |
| ENSG00000260276 | ENSG00000140650 |
| ENSG00000230267 | ENSG00000140675 |
| ENSG00000232748 | ENSG00000140675 |
| ENSG00000260494 | ENSG00000140675 |
| ENSG00000261346 | ENSG00000140678 |
| ENSG00000230267 | ENSG00000140682 |
| ENSG00000261346 | ENSG00000140682 |
| ENSG00000230267 | ENSG00000140688 |
| ENSG00000235560 | ENSG00000140688 |
| ENSG00000239791 | ENSG00000140688 |
| ENSG00000260267 | ENSG00000140691 |
| ENSG00000260911 | ENSG00000140691 |
| ENSG00000183458 | ENSG00000140694 |
| ENSG00000188599 | ENSG00000140694 |
| ENSG00000250251 | ENSG00000140694 |
| ENSG00000262454 | ENSG00000140694 |
| ENSG00000270580 | ENSG00000140694 |
| ENSG00000275910 | ENSG00000140694 |
| ENSG00000180747 | ENSG00000140740 |
| ENSG00000189149 | ENSG00000140740 |
| ENSG00000248124 | ENSG00000140740 |

|                 |                 |
|-----------------|-----------------|
| ENSG00000180747 | ENSG00000140749 |
| ENSG00000260448 | ENSG00000140750 |
| ENSG00000262587 | ENSG00000140750 |
| ENSG00000260281 | ENSG00000140795 |
| ENSG00000255986 | ENSG00000140848 |
| ENSG00000260549 | ENSG00000140848 |
| ENSG00000277978 | ENSG00000140931 |
| ENSG00000246898 | ENSG00000140939 |
| ENSG00000261519 | ENSG00000140939 |
| ENSG00000236829 | ENSG00000140983 |
| ENSG00000262686 | ENSG00000140987 |
| ENSG00000267048 | ENSG00000140995 |
| ENSG00000223959 | ENSG00000141002 |
| ENSG00000259006 | ENSG00000141002 |
| ENSG00000267048 | ENSG00000141002 |
| ENSG00000261273 | ENSG00000141012 |
| ENSG00000222019 | ENSG00000141013 |
| ENSG00000175061 | ENSG00000141040 |
| ENSG00000261386 | ENSG00000141086 |
| ENSG00000263276 | ENSG00000141086 |
| ENSG00000227036 | ENSG00000141219 |
| ENSG00000265010 | ENSG00000141219 |
| ENSG00000263015 | ENSG00000141252 |
| ENSG00000263345 | ENSG00000141258 |
| ENSG00000228782 | ENSG00000141279 |
| ENSG00000234494 | ENSG00000141279 |
| ENSG00000262879 | ENSG00000141279 |
| ENSG00000263142 | ENSG00000141279 |
| ENSG00000263766 | ENSG00000141279 |
| ENSG00000214719 | ENSG00000141298 |
| ENSG00000248121 | ENSG00000141298 |
| ENSG00000264031 | ENSG00000141298 |
| ENSG00000264538 | ENSG00000141298 |
| ENSG00000237854 | ENSG00000141337 |
| ENSG00000231749 | ENSG00000141338 |
| ENSG00000267023 | ENSG00000141338 |
| ENSG00000188825 | ENSG00000141349 |
| ENSG00000259349 | ENSG00000141367 |
| ENSG00000267108 | ENSG00000141385 |
| ENSG00000267108 | ENSG00000141391 |
| ENSG00000267199 | ENSG00000141391 |
| ENSG00000268573 | ENSG00000141429 |
| ENSG00000235085 | ENSG00000141456 |
| ENSG00000261879 | ENSG00000141456 |
| ENSG00000235085 | ENSG00000141480 |
| ENSG00000261879 | ENSG00000141497 |
| ENSG00000215067 | ENSG00000141499 |
| ENSG00000265749 | ENSG00000141499 |

|                 |                 |
|-----------------|-----------------|
| ENSG00000261879 | ENSG00000141503 |
| ENSG00000264772 | ENSG00000141504 |
| ENSG00000215067 | ENSG00000141510 |
| ENSG00000256806 | ENSG00000141510 |
| ENSG00000263301 | ENSG00000141510 |
| ENSG00000262580 | ENSG00000141527 |
| ENSG00000226137 | ENSG00000141543 |
| ENSG00000263321 | ENSG00000141556 |
| ENSG00000279066 | ENSG00000141562 |
| ENSG00000261924 | ENSG00000141564 |
| ENSG00000263069 | ENSG00000141564 |
| ENSG00000163597 | ENSG00000141569 |
| ENSG00000267342 | ENSG00000141569 |
| ENSG00000267801 | ENSG00000141569 |
| ENSG00000260005 | ENSG00000141577 |
| ENSG00000262223 | ENSG00000141577 |
| ENSG00000263069 | ENSG00000141577 |
| ENSG00000227115 | ENSG00000141642 |
| ENSG00000227115 | ENSG00000141646 |
| ENSG00000236194 | ENSG00000141696 |
| ENSG00000267221 | ENSG00000141696 |
| ENSG00000188825 | ENSG00000141699 |
| ENSG00000267765 | ENSG00000141699 |
| ENSG00000261126 | ENSG00000141759 |
| ENSG00000266924 | ENSG00000141759 |
| ENSG00000261342 | ENSG00000141873 |
| ENSG00000267436 | ENSG00000141873 |
| ENSG00000267436 | ENSG00000141905 |
| ENSG00000184441 | ENSG00000141959 |
| ENSG00000267484 | ENSG00000141965 |
| ENSG00000267571 | ENSG00000141968 |
| ENSG00000254503 | ENSG00000141971 |
| ENSG00000269053 | ENSG00000141971 |
| ENSG00000269439 | ENSG00000141971 |
| ENSG00000269481 | ENSG00000141971 |
| ENSG00000269807 | ENSG00000142002 |
| ENSG00000256612 | ENSG00000142039 |
| ENSG00000267107 | ENSG00000142039 |
| ENSG00000268475 | ENSG00000142039 |
| ENSG00000130612 | ENSG00000142046 |
| ENSG00000268475 | ENSG00000142046 |
| ENSG00000270164 | ENSG00000142046 |
| ENSG00000251661 | ENSG00000142082 |
| ENSG00000250397 | ENSG00000142089 |
| ENSG00000251661 | ENSG00000142089 |
| ENSG00000255108 | ENSG00000142089 |
| ENSG00000255026 | ENSG00000142102 |
| ENSG00000228404 | ENSG00000142156 |

|                 |                 |
|-----------------|-----------------|
| ENSG00000238197 | ENSG00000142166 |
| ENSG00000215424 | ENSG00000142173 |
| ENSG00000229719 | ENSG00000142186 |
| ENSG00000245532 | ENSG00000142186 |
| ENSG00000273492 | ENSG00000142192 |
| ENSG00000232871 | ENSG00000142233 |
| ENSG00000267348 | ENSG00000142252 |
| ENSG00000267219 | ENSG00000142279 |
| ENSG00000227479 | ENSG00000142327 |
| ENSG00000267858 | ENSG00000142396 |
| ENSG00000268230 | ENSG00000142396 |
| ENSG00000268895 | ENSG00000142396 |
| ENSG00000267549 | ENSG00000142409 |
| ENSG00000266936 | ENSG00000142444 |
| ENSG00000266978 | ENSG00000142453 |
| ENSG00000154874 | ENSG00000142494 |
| ENSG00000228983 | ENSG00000142494 |
| ENSG00000262769 | ENSG00000142494 |
| ENSG00000232871 | ENSG00000142552 |
| ENSG00000235191 | ENSG00000142552 |
| ENSG00000123870 | ENSG00000142556 |
| ENSG00000213793 | ENSG00000142556 |
| ENSG00000242779 | ENSG00000142556 |
| ENSG00000260160 | ENSG00000142556 |
| ENSG00000269235 | ENSG00000142556 |
| ENSG00000269388 | ENSG00000142556 |
| ENSG00000228526 | ENSG00000142599 |
| ENSG00000232912 | ENSG00000142599 |
| ENSG00000234546 | ENSG00000142599 |
| ENSG00000080947 | ENSG00000142627 |
| ENSG00000226029 | ENSG00000142627 |
| ENSG00000237276 | ENSG00000142627 |
| ENSG00000237938 | ENSG00000142627 |
| ENSG00000268869 | ENSG00000142627 |
| ENSG00000237276 | ENSG00000142632 |
| ENSG00000175147 | ENSG00000142634 |
| ENSG00000225315 | ENSG00000142661 |
| ENSG00000225315 | ENSG00000142677 |
| ENSG00000264443 | ENSG00000142677 |
| ENSG00000227409 | ENSG00000142686 |
| ENSG00000116883 | ENSG00000142694 |
| ENSG00000248802 | ENSG00000142731 |
| ENSG00000251432 | ENSG00000142731 |
| ENSG00000235912 | ENSG00000142784 |
| ENSG00000228431 | ENSG00000142864 |
| ENSG00000282057 | ENSG00000142871 |
| ENSG00000122432 | ENSG00000142875 |
| ENSG00000240520 | ENSG00000142875 |

|                 |                 |
|-----------------|-----------------|
| ENSG00000186056 | ENSG00000142910 |
| ENSG00000223382 | ENSG00000142910 |
| ENSG00000235790 | ENSG00000142910 |
| ENSG00000225099 | ENSG00000142949 |
| ENSG00000230615 | ENSG00000142949 |
| ENSG00000230615 | ENSG00000142959 |
| ENSG00000232022 | ENSG00000142961 |
| ENSG00000224081 | ENSG00000143036 |
| ENSG00000236137 | ENSG00000143061 |
| ENSG00000198857 | ENSG00000143067 |
| ENSG00000224238 | ENSG00000143067 |
| ENSG00000231365 | ENSG00000143067 |
| ENSG00000240194 | ENSG00000143110 |
| ENSG00000224699 | ENSG00000143119 |
| ENSG00000227963 | ENSG00000143119 |
| ENSG00000231346 | ENSG00000143119 |
| ENSG00000224699 | ENSG00000143125 |
| ENSG00000240194 | ENSG00000143125 |
| ENSG00000225171 | ENSG00000143157 |
| ENSG00000198358 | ENSG00000143224 |
| ENSG00000228863 | ENSG00000143224 |
| ENSG00000198358 | ENSG00000143226 |
| ENSG00000224985 | ENSG00000143226 |
| ENSG00000228863 | ENSG00000143226 |
| ENSG00000232995 | ENSG00000143248 |
| ENSG00000228863 | ENSG00000143257 |
| ENSG00000236947 | ENSG00000143314 |
| ENSG00000198358 | ENSG00000143315 |
| ENSG00000224259 | ENSG00000143315 |
| ENSG00000228863 | ENSG00000143315 |
| ENSG00000232188 | ENSG00000143315 |
| ENSG00000224259 | ENSG00000143318 |
| ENSG00000228863 | ENSG00000143318 |
| ENSG00000229953 | ENSG00000143319 |
| ENSG00000236947 | ENSG00000143319 |
| ENSG00000272405 | ENSG00000143320 |
| ENSG00000236539 | ENSG00000143340 |
| ENSG00000203288 | ENSG00000143367 |
| ENSG00000229021 | ENSG00000143367 |
| ENSG00000237975 | ENSG00000143367 |
| ENSG00000249602 | ENSG00000143367 |
| ENSG00000237975 | ENSG00000143373 |
| ENSG00000249602 | ENSG00000143373 |
| ENSG00000203804 | ENSG00000143379 |
| ENSG00000249602 | ENSG00000143379 |
| ENSG00000237781 | ENSG00000143382 |
| ENSG00000224645 | ENSG00000143384 |
| ENSG00000237781 | ENSG00000143387 |

|                 |                 |
|-----------------|-----------------|
| ENSG00000203804 | ENSG00000143390 |
| ENSG00000229021 | ENSG00000143390 |
| ENSG00000234614 | ENSG00000143390 |
| ENSG00000237781 | ENSG00000143390 |
| ENSG00000237975 | ENSG00000143390 |
| ENSG00000237975 | ENSG00000143398 |
| ENSG00000249602 | ENSG00000143398 |
| ENSG00000237781 | ENSG00000143401 |
| ENSG00000237781 | ENSG00000143409 |
| ENSG00000237975 | ENSG00000143416 |
| ENSG00000249602 | ENSG00000143416 |
| ENSG00000203804 | ENSG00000143420 |
| ENSG00000249602 | ENSG00000143434 |
| ENSG00000234614 | ENSG00000143436 |
| ENSG00000237975 | ENSG00000143436 |
| ENSG00000249602 | ENSG00000143436 |
| ENSG00000249602 | ENSG00000143437 |
| ENSG00000203804 | ENSG00000143442 |
| ENSG00000224645 | ENSG00000143442 |
| ENSG00000237975 | ENSG00000143442 |
| ENSG00000249602 | ENSG00000143442 |
| ENSG00000229021 | ENSG00000143450 |
| ENSG00000234614 | ENSG00000143450 |
| ENSG00000237975 | ENSG00000143450 |
| ENSG00000249602 | ENSG00000143450 |
| ENSG00000224645 | ENSG00000143458 |
| ENSG00000229021 | ENSG00000143458 |
| ENSG00000234614 | ENSG00000143458 |
| ENSG00000153363 | ENSG00000143493 |
| ENSG00000230461 | ENSG00000143494 |
| ENSG00000230461 | ENSG00000143499 |
| ENSG00000237975 | ENSG00000143546 |
| ENSG00000272030 | ENSG00000143549 |
| ENSG00000273026 | ENSG00000143578 |
| ENSG00000246203 | ENSG00000143622 |
| ENSG00000229021 | ENSG00000143631 |
| ENSG00000237975 | ENSG00000143631 |
| ENSG00000224407 | ENSG00000143641 |
| ENSG00000227006 | ENSG00000143641 |
| ENSG00000223519 | ENSG00000143653 |
| ENSG00000227953 | ENSG00000143653 |
| ENSG00000228643 | ENSG00000143727 |
| ENSG00000227496 | ENSG00000143742 |
| ENSG00000185495 | ENSG00000143753 |
| ENSG00000272645 | ENSG00000143753 |
| ENSG00000272645 | ENSG00000143786 |
| ENSG00000227496 | ENSG00000143811 |
| ENSG00000223396 | ENSG00000143851 |



|                 |                 |
|-----------------|-----------------|
| ENSG00000231871 | ENSG00000143851 |
| ENSG00000234678 | ENSG00000143851 |
| ENSG00000243323 | ENSG00000143851 |
| ENSG00000223396 | ENSG00000143862 |
| ENSG00000231871 | ENSG00000143862 |
| ENSG00000234678 | ENSG00000143862 |
| ENSG00000243323 | ENSG00000143862 |
| ENSG00000231367 | ENSG00000143889 |
| ENSG00000232973 | ENSG00000143889 |
| ENSG00000235848 | ENSG00000143889 |
| ENSG00000236213 | ENSG00000143889 |
| ENSG00000231367 | ENSG00000143891 |
| ENSG00000232973 | ENSG00000143891 |
| ENSG00000235848 | ENSG00000143891 |
| ENSG00000223935 | ENSG00000143952 |
| ENSG00000224165 | ENSG00000143970 |
| ENSG00000204685 | ENSG00000144021 |
| ENSG00000232931 | ENSG00000144029 |
| ENSG00000228384 | ENSG00000144031 |
| ENSG00000163016 | ENSG00000144036 |
| ENSG00000163016 | ENSG00000144040 |
| ENSG00000228384 | ENSG00000144043 |
| ENSG00000204581 | ENSG00000144063 |
| ENSG00000224789 | ENSG00000144118 |
| ENSG00000243389 | ENSG00000144130 |
| ENSG00000234199 | ENSG00000144134 |
| ENSG00000240356 | ENSG00000144134 |
| ENSG00000189223 | ENSG00000144136 |
| ENSG00000240356 | ENSG00000144136 |
| ENSG00000243389 | ENSG00000144136 |
| ENSG00000272667 | ENSG00000144230 |
| ENSG00000274010 | ENSG00000144231 |
| ENSG00000224063 | ENSG00000144366 |
| ENSG00000229127 | ENSG00000144445 |
| ENSG00000234281 | ENSG00000144445 |
| ENSG00000227252 | ENSG00000144476 |
| ENSG00000223923 | ENSG00000144580 |
| ENSG00000249786 | ENSG00000144597 |
| ENSG00000213842 | ENSG00000144635 |
| ENSG00000261572 | ENSG00000144635 |
| ENSG00000235904 | ENSG00000144642 |
| ENSG00000198590 | ENSG00000144668 |
| ENSG00000230067 | ENSG00000144668 |
| ENSG00000235257 | ENSG00000144668 |
| ENSG00000236411 | ENSG00000144668 |
| ENSG00000213943 | ENSG00000144712 |
| ENSG00000241472 | ENSG00000144724 |
| ENSG00000241163 | ENSG00000144736 |

|                 |                 |
|-----------------|-----------------|
| ENSG00000244513 | ENSG00000144746 |
| ENSG00000244513 | ENSG00000144747 |
| ENSG00000236869 | ENSG00000144792 |
| ENSG00000272077 | ENSG00000144792 |
| ENSG00000239462 | ENSG00000144810 |
| ENSG00000242622 | ENSG00000144840 |
| ENSG00000240254 | ENSG00000144852 |
| ENSG00000239482 | ENSG00000144857 |
| ENSG00000243795 | ENSG00000144857 |
| ENSG00000242337 | ENSG00000144867 |
| ENSG00000246022 | ENSG00000144908 |
| ENSG00000250934 | ENSG00000144908 |
| ENSG00000241570 | ENSG00000144935 |
| ENSG00000229334 | ENSG00000145014 |
| ENSG00000231770 | ENSG00000145014 |
| ENSG00000233058 | ENSG00000145014 |
| ENSG00000214135 | ENSG00000145016 |
| ENSG00000272989 | ENSG00000145016 |
| ENSG00000225399 | ENSG00000145022 |
| ENSG00000235016 | ENSG00000145022 |
| ENSG00000223343 | ENSG00000145029 |
| ENSG00000235016 | ENSG00000145029 |
| ENSG00000224769 | ENSG00000145113 |
| ENSG00000231443 | ENSG00000145113 |
| ENSG00000233441 | ENSG00000145194 |
| ENSG00000233441 | ENSG00000145198 |
| ENSG00000196810 | ENSG00000145217 |
| ENSG00000248416 | ENSG00000145217 |
| ENSG00000250846 | ENSG00000145242 |
| ENSG00000248254 | ENSG00000145246 |
| ENSG00000245322 | ENSG00000145331 |
| ENSG00000246090 | ENSG00000145331 |
| ENSG00000248676 | ENSG00000145331 |
| ENSG00000251095 | ENSG00000145335 |
| ENSG00000248161 | ENSG00000145354 |
| ENSG00000154608 | ENSG00000145390 |
| ENSG00000245958 | ENSG00000145390 |
| ENSG00000250412 | ENSG00000145390 |
| ENSG00000196951 | ENSG00000145391 |
| ENSG00000273247 | ENSG00000145391 |
| ENSG00000250056 | ENSG00000145545 |
| ENSG00000215196 | ENSG00000145555 |
| ENSG00000244968 | ENSG00000145623 |
| ENSG00000249740 | ENSG00000145623 |
| ENSG00000247572 | ENSG00000145687 |
| ENSG00000225407 | ENSG00000145708 |
| ENSG00000250802 | ENSG00000145708 |
| ENSG00000248664 | ENSG00000145740 |

|                 |                 |
|-----------------|-----------------|
| ENSG00000249476 | ENSG00000145743 |
| ENSG00000246859 | ENSG00000145777 |
| ENSG00000249249 | ENSG00000145780 |
| ENSG00000248445 | ENSG00000145782 |
| ENSG00000224186 | ENSG00000145824 |
| ENSG00000247699 | ENSG00000145861 |
| ENSG00000253406 | ENSG00000145882 |
| ENSG00000253618 | ENSG00000145882 |
| ENSG00000249035 | ENSG00000145907 |
| ENSG00000197083 | ENSG00000145908 |
| ENSG00000249035 | ENSG00000145908 |
| ENSG00000246596 | ENSG00000145911 |
| ENSG00000216657 | ENSG00000145945 |
| ENSG00000230438 | ENSG00000145945 |
| ENSG00000250903 | ENSG00000145949 |
| ENSG00000233937 | ENSG00000146054 |
| ENSG00000250900 | ENSG00000146054 |
| ENSG00000233937 | ENSG00000146063 |
| ENSG00000247049 | ENSG00000146063 |
| ENSG00000250900 | ENSG00000146063 |
| ENSG00000248996 | ENSG00000146067 |
| ENSG00000246334 | ENSG00000146083 |
| ENSG00000247679 | ENSG00000146094 |
| ENSG00000224843 | ENSG00000146109 |
| ENSG00000206337 | ENSG00000146112 |
| ENSG00000214894 | ENSG00000146112 |
| ENSG00000270604 | ENSG00000146112 |
| ENSG00000272221 | ENSG00000146112 |
| ENSG00000246982 | ENSG00000146192 |
| ENSG00000237686 | ENSG00000146216 |
| ENSG00000237686 | ENSG00000146232 |
| ENSG00000236548 | ENSG00000146373 |
| ENSG00000231329 | ENSG00000146386 |
| ENSG00000227954 | ENSG00000146409 |
| ENSG00000227954 | ENSG00000146411 |
| ENSG00000236700 | ENSG00000146411 |
| ENSG00000233452 | ENSG00000146414 |
| ENSG00000270638 | ENSG00000146414 |
| ENSG00000224460 | ENSG00000146416 |
| ENSG00000218226 | ENSG00000146433 |
| ENSG00000236708 | ENSG00000146555 |
| ENSG00000176826 | ENSG00000146648 |
| ENSG00000214765 | ENSG00000146676 |
| ENSG00000214783 | ENSG00000146676 |
| ENSG00000228903 | ENSG00000146676 |
| ENSG00000273432 | ENSG00000146676 |
| ENSG00000186704 | ENSG00000146700 |
| ENSG00000205485 | ENSG00000146700 |

|                 |                 |
|-----------------|-----------------|
| ENSG00000214439 | ENSG00000146700 |
| ENSG00000227038 | ENSG00000146700 |
| ENSG00000186704 | ENSG00000146701 |
| ENSG00000205485 | ENSG00000146701 |
| ENSG00000227038 | ENSG00000146701 |
| ENSG00000176826 | ENSG00000146731 |
| ENSG00000176826 | ENSG00000146733 |
| ENSG00000226851 | ENSG00000146802 |
| ENSG00000242798 | ENSG00000146826 |
| ENSG00000242798 | ENSG00000146828 |
| ENSG00000078319 | ENSG00000146834 |
| ENSG00000242294 | ENSG00000146834 |
| ENSG00000272752 | ENSG00000146834 |
| ENSG00000226380 | ENSG00000146842 |
| ENSG00000231721 | ENSG00000146842 |
| ENSG00000233559 | ENSG00000146842 |
| ENSG00000240571 | ENSG00000146842 |
| ENSG00000273329 | ENSG00000146842 |
| ENSG00000223500 | ENSG00000146859 |
| ENSG00000229153 | ENSG00000146904 |
| ENSG00000232533 | ENSG00000146904 |
| ENSG00000244198 | ENSG00000146904 |
| ENSG00000244479 | ENSG00000146904 |
| ENSG00000253882 | ENSG00000146904 |
| ENSG00000226679 | ENSG00000147036 |
| ENSG00000235806 | ENSG00000147041 |
| ENSG00000225470 | ENSG00000147100 |
| ENSG00000230590 | ENSG00000147100 |
| ENSG00000269904 | ENSG00000147100 |
| ENSG00000229563 | ENSG00000147121 |
| ENSG00000270069 | ENSG00000147121 |
| ENSG00000215284 | ENSG00000147123 |
| ENSG00000235636 | ENSG00000147123 |
| ENSG00000232611 | ENSG00000147274 |
| ENSG00000173295 | ENSG00000147324 |
| ENSG00000253981 | ENSG00000147324 |
| ENSG00000182366 | ENSG00000147364 |
| ENSG00000249868 | ENSG00000147364 |
| ENSG00000232725 | ENSG00000147394 |
| ENSG00000260081 | ENSG00000147400 |
| ENSG00000253125 | ENSG00000147454 |
| ENSG00000253476 | ENSG00000147459 |
| ENSG00000253161 | ENSG00000147465 |
| ENSG00000253161 | ENSG00000147475 |
| ENSG00000253161 | ENSG00000147535 |
| ENSG00000253356 | ENSG00000147535 |
| ENSG00000272092 | ENSG00000147535 |
| ENSG00000253161 | ENSG00000147548 |

|                 |                 |
|-----------------|-----------------|
| ENSG00000253356 | ENSG00000147548 |
| ENSG00000246366 | ENSG00000147592 |
| ENSG00000253258 | ENSG00000147689 |
| ENSG00000232600 | ENSG00000147789 |
| ENSG00000255050 | ENSG00000147813 |
| ENSG00000225472 | ENSG00000147862 |
| ENSG00000171889 | ENSG00000147883 |
| ENSG00000236739 | ENSG00000147883 |
| ENSG00000233262 | ENSG00000148057 |
| ENSG00000228623 | ENSG00000148158 |
| ENSG00000230185 | ENSG00000148225 |
| ENSG00000235106 | ENSG00000148297 |
| ENSG00000119440 | ENSG00000148308 |
| ENSG00000204054 | ENSG00000148331 |
| ENSG00000204055 | ENSG00000148331 |
| ENSG00000234789 | ENSG00000148331 |
| ENSG00000257524 | ENSG00000148334 |
| ENSG00000204054 | ENSG00000148335 |
| ENSG00000204055 | ENSG00000148335 |
| ENSG00000234789 | ENSG00000148335 |
| ENSG00000204055 | ENSG00000148337 |
| ENSG00000234771 | ENSG00000148339 |
| ENSG00000204054 | ENSG00000148341 |
| ENSG00000204054 | ENSG00000148343 |
| ENSG00000204055 | ENSG00000148343 |
| ENSG00000228395 | ENSG00000148343 |
| ENSG00000234789 | ENSG00000148344 |
| ENSG00000196366 | ENSG00000148362 |
| ENSG00000237886 | ENSG00000148362 |
| ENSG00000196366 | ENSG00000148396 |
| ENSG00000237339 | ENSG00000148396 |
| ENSG00000203993 | ENSG00000148399 |
| ENSG00000237339 | ENSG00000148400 |
| ENSG00000180539 | ENSG00000148411 |
| ENSG00000264527 | ENSG00000148411 |
| ENSG00000224215 | ENSG00000148450 |
| ENSG00000196566 | ENSG00000148671 |
| ENSG00000223482 | ENSG00000148671 |
| ENSG00000225913 | ENSG00000148671 |
| ENSG00000272631 | ENSG00000148671 |
| ENSG00000196566 | ENSG00000148672 |
| ENSG00000223482 | ENSG00000148672 |
| ENSG00000225913 | ENSG00000148672 |
| ENSG00000272734 | ENSG00000148672 |
| ENSG00000282772 | ENSG00000148795 |
| ENSG00000214279 | ENSG00000148803 |
| ENSG00000234311 | ENSG00000148803 |
| ENSG00000270075 | ENSG00000148834 |

|                 |                 |
|-----------------|-----------------|
| ENSG00000273485 | ENSG00000148843 |
| ENSG00000223528 | ENSG00000148848 |
| ENSG00000246273 | ENSG00000148926 |
| ENSG00000246250 | ENSG00000149084 |
| ENSG00000183242 | ENSG00000149100 |
| ENSG00000255252 | ENSG00000149100 |
| ENSG00000254602 | ENSG00000149115 |
| ENSG00000255929 | ENSG00000149212 |
| ENSG00000255929 | ENSG00000149218 |
| ENSG00000254459 | ENSG00000149262 |
| ENSG00000254433 | ENSG00000149313 |
| ENSG00000256633 | ENSG00000149357 |
| ENSG00000124915 | ENSG00000149476 |
| ENSG00000256813 | ENSG00000149485 |
| ENSG00000243742 | ENSG00000149489 |
| ENSG00000280832 | ENSG00000149557 |
| ENSG00000257271 | ENSG00000149571 |
| ENSG00000280832 | ENSG00000149571 |
| ENSG00000254851 | ENSG00000149577 |
| ENSG00000278768 | ENSG00000149577 |
| ENSG00000198547 | ENSG00000149599 |
| ENSG00000236772 | ENSG00000149599 |
| ENSG00000269549 | ENSG00000149634 |
| ENSG00000273828 | ENSG00000149634 |
| ENSG00000173727 | ENSG00000149792 |
| ENSG00000251562 | ENSG00000149798 |
| ENSG00000173727 | ENSG00000149809 |
| ENSG00000245532 | ENSG00000149809 |
| ENSG00000255200 | ENSG00000149823 |
| ENSG00000198106 | ENSG00000149925 |
| ENSG00000260517 | ENSG00000149925 |
| ENSG00000261346 | ENSG00000149925 |
| ENSG00000261416 | ENSG00000149925 |
| ENSG00000183604 | ENSG00000149927 |
| ENSG00000198106 | ENSG00000149927 |
| ENSG00000205534 | ENSG00000149927 |
| ENSG00000250616 | ENSG00000149927 |
| ENSG00000260494 | ENSG00000149927 |
| ENSG00000260517 | ENSG00000149927 |
| ENSG00000260953 | ENSG00000149927 |
| ENSG00000103472 | ENSG00000149930 |
| ENSG00000198106 | ENSG00000149930 |
| ENSG00000260517 | ENSG00000149930 |
| ENSG00000260908 | ENSG00000149930 |
| ENSG00000261346 | ENSG00000149930 |
| ENSG00000183604 | ENSG00000149932 |
| ENSG00000198106 | ENSG00000149932 |
| ENSG00000205534 | ENSG00000149932 |

|                 |                 |
|-----------------|-----------------|
| ENSG00000260517 | ENSG00000149932 |
| ENSG00000250748 | ENSG00000149948 |
| ENSG00000229656 | ENSG00000150076 |
| ENSG00000229656 | ENSG00000150093 |
| ENSG00000226067 | ENSG00000150337 |
| ENSG00000237781 | ENSG00000150337 |
| ENSG00000237233 | ENSG00000150347 |
| ENSG00000276248 | ENSG00000150401 |
| ENSG00000254607 | ENSG00000150455 |
| ENSG00000255062 | ENSG00000150455 |
| ENSG00000280832 | ENSG00000150455 |
| ENSG00000248692 | ENSG00000150471 |
| ENSG00000248968 | ENSG00000150753 |
| ENSG00000271980 | ENSG00000150756 |
| ENSG00000223528 | ENSG00000150760 |
| ENSG00000196167 | ENSG00000150764 |
| ENSG00000247416 | ENSG00000150768 |
| ENSG00000213234 | ENSG00000150779 |
| ENSG00000196167 | ENSG00000150782 |
| ENSG00000223685 | ENSG00000150893 |
| ENSG00000168852 | ENSG00000150907 |
| ENSG00000215483 | ENSG00000150907 |
| ENSG00000230710 | ENSG00000150907 |
| ENSG00000154608 | ENSG00000150961 |
| ENSG00000250412 | ENSG00000150961 |
| ENSG00000256249 | ENSG00000150977 |
| ENSG00000235978 | ENSG00000150995 |
| ENSG00000261346 | ENSG00000151006 |
| ENSG00000273247 | ENSG00000151014 |
| ENSG00000235049 | ENSG00000151062 |
| ENSG00000235049 | ENSG00000151065 |
| ENSG00000246627 | ENSG00000151067 |
| ENSG00000254966 | ENSG00000151116 |
| ENSG00000212789 | ENSG00000151117 |
| ENSG00000255650 | ENSG00000151148 |
| ENSG00000228748 | ENSG00000151208 |
| ENSG00000236467 | ENSG00000151208 |
| ENSG00000223652 | ENSG00000151292 |
| ENSG00000254409 | ENSG00000151348 |
| ENSG00000246174 | ENSG00000151366 |
| ENSG00000258580 | ENSG00000151413 |
| ENSG00000258569 | ENSG00000151445 |
| ENSG00000261324 | ENSG00000151490 |
| ENSG00000251226 | ENSG00000151502 |
| ENSG00000232934 | ENSG00000151532 |
| ENSG00000231858 | ENSG00000151690 |
| ENSG00000233110 | ENSG00000151726 |
| ENSG00000249096 | ENSG00000151726 |

|                 |                 |
|-----------------|-----------------|
| ENSG00000250410 | ENSG00000151726 |
| ENSG00000251139 | ENSG00000151726 |
| ENSG00000235902 | ENSG00000151729 |
| ENSG00000257530 | ENSG00000151746 |
| ENSG00000227258 | ENSG00000151778 |
| ENSG00000177738 | ENSG00000151881 |
| ENSG00000248464 | ENSG00000151881 |
| ENSG00000260572 | ENSG00000151967 |
| ENSG00000178162 | ENSG00000152076 |
| ENSG00000178162 | ENSG00000152082 |
| ENSG00000242193 | ENSG00000152092 |
| ENSG00000254154 | ENSG00000152092 |
| ENSG00000152117 | ENSG00000152102 |
| ENSG00000178162 | ENSG00000152102 |
| ENSG00000230461 | ENSG00000152104 |
| ENSG00000250536 | ENSG00000152104 |
| ENSG00000224043 | ENSG00000152127 |
| ENSG00000213144 | ENSG00000152137 |
| ENSG00000231367 | ENSG00000152147 |
| ENSG00000232973 | ENSG00000152147 |
| ENSG00000235848 | ENSG00000152147 |
| ENSG00000271443 | ENSG00000152147 |
| ENSG00000274776 | ENSG00000152242 |
| ENSG00000246575 | ENSG00000152291 |
| ENSG00000267858 | ENSG00000152443 |
| ENSG00000268205 | ENSG00000152443 |
| ENSG00000268230 | ENSG00000152443 |
| ENSG00000272853 | ENSG00000152457 |
| ENSG00000268379 | ENSG00000152467 |
| ENSG00000268516 | ENSG00000152467 |
| ENSG00000232098 | ENSG00000152475 |
| ENSG00000268230 | ENSG00000152475 |
| ENSG00000269054 | ENSG00000152475 |
| ENSG00000275294 | ENSG00000152484 |
| ENSG00000257735 | ENSG00000152556 |
| ENSG00000243305 | ENSG00000152601 |
| ENSG00000250271 | ENSG00000152601 |
| ENSG00000224186 | ENSG00000152700 |
| ENSG00000273345 | ENSG00000152700 |
| ENSG00000180139 | ENSG00000152766 |
| ENSG00000226002 | ENSG00000152926 |
| ENSG00000234585 | ENSG00000152926 |
| ENSG00000179978 | ENSG00000152939 |
| ENSG00000243415 | ENSG00000152952 |
| ENSG00000232586 | ENSG00000153029 |
| ENSG00000243155 | ENSG00000153029 |
| ENSG00000260276 | ENSG00000153048 |
| ENSG00000244968 | ENSG00000153071 |



|                 |                 |
|-----------------|-----------------|
| ENSG00000249740 | ENSG00000153071 |
| ENSG00000251314 | ENSG00000153113 |
| ENSG00000196951 | ENSG00000153132 |
| ENSG00000249661 | ENSG00000153132 |
| ENSG00000236296 | ENSG00000153147 |
| ENSG00000250326 | ENSG00000153147 |
| ENSG00000251600 | ENSG00000153147 |
| ENSG00000172965 | ENSG00000153208 |
| ENSG00000243389 | ENSG00000153214 |
| ENSG00000226266 | ENSG00000153250 |
| ENSG00000227403 | ENSG00000153250 |
| ENSG00000235724 | ENSG00000153250 |
| ENSG00000263823 | ENSG00000153339 |
| ENSG00000185986 | ENSG00000153395 |
| ENSG00000251532 | ENSG00000153395 |
| ENSG00000267072 | ENSG00000153443 |
| ENSG00000227105 | ENSG00000153487 |
| ENSG00000232814 | ENSG00000153487 |
| ENSG00000222041 | ENSG00000153563 |
| ENSG00000280721 | ENSG00000153563 |
| ENSG00000235448 | ENSG00000153714 |
| ENSG00000236432 | ENSG00000153820 |
| ENSG00000225963 | ENSG00000153827 |
| ENSG00000277013 | ENSG00000153885 |
| ENSG00000223653 | ENSG00000153904 |
| ENSG00000282057 | ENSG00000153904 |
| ENSG00000267272 | ENSG00000153936 |
| ENSG00000265542 | ENSG00000153944 |
| ENSG00000141028 | ENSG00000153976 |
| ENSG00000236088 | ENSG00000153976 |
| ENSG00000265148 | ENSG00000153982 |
| ENSG00000267248 | ENSG00000153982 |
| ENSG00000154874 | ENSG00000154025 |
| ENSG00000262769 | ENSG00000154025 |
| ENSG00000273018 | ENSG00000154025 |
| ENSG00000232295 | ENSG00000154079 |
| ENSG00000233237 | ENSG00000154079 |
| ENSG00000227742 | ENSG00000154222 |
| ENSG00000215023 | ENSG00000154252 |
| ENSG00000215692 | ENSG00000154252 |
| ENSG00000224272 | ENSG00000154252 |
| ENSG00000233806 | ENSG00000154252 |
| ENSG00000231749 | ENSG00000154258 |
| ENSG00000231749 | ENSG00000154262 |
| ENSG00000267023 | ENSG00000154262 |
| ENSG00000231749 | ENSG00000154263 |
| ENSG00000267603 | ENSG00000154263 |
| ENSG00000227220 | ENSG00000154269 |

|                 |                 |
|-----------------|-----------------|
| ENSG00000282111 | ENSG00000154358 |
| ENSG00000227496 | ENSG00000154380 |
| ENSG00000270598 | ENSG00000154380 |
| ENSG00000231999 | ENSG00000154451 |
| ENSG00000235902 | ENSG00000154556 |
| ENSG00000215386 | ENSG00000154639 |
| ENSG00000244676 | ENSG00000154642 |
| ENSG00000244676 | ENSG00000154645 |
| ENSG00000265487 | ENSG00000154655 |
| ENSG00000234883 | ENSG00000154721 |
| ENSG00000273492 | ENSG00000154721 |
| ENSG00000273492 | ENSG00000154727 |
| ENSG00000267745 | ENSG00000154760 |
| ENSG00000263627 | ENSG00000154845 |
| ENSG00000265962 | ENSG00000154845 |
| ENSG00000229980 | ENSG00000154945 |
| ENSG00000251239 | ENSG00000154945 |
| ENSG00000224057 | ENSG00000154978 |
| ENSG00000204685 | ENSG00000155066 |
| ENSG00000232717 | ENSG00000155066 |
| ENSG00000253320 | ENSG00000155090 |
| ENSG00000254281 | ENSG00000155090 |
| ENSG00000253320 | ENSG00000155096 |
| ENSG00000254236 | ENSG00000155096 |
| ENSG00000254281 | ENSG00000155096 |
| ENSG00000253320 | ENSG00000155097 |
| ENSG00000253669 | ENSG00000155097 |
| ENSG00000254281 | ENSG00000155097 |
| ENSG00000231889 | ENSG00000155111 |
| ENSG00000231889 | ENSG00000155115 |
| ENSG00000215374 | ENSG00000155189 |
| ENSG00000227695 | ENSG00000155287 |
| ENSG00000224905 | ENSG00000155304 |
| ENSG00000235609 | ENSG00000155304 |
| ENSG00000281903 | ENSG00000155304 |
| ENSG00000215559 | ENSG00000155307 |
| ENSG00000224905 | ENSG00000155307 |
| ENSG00000228314 | ENSG00000155307 |
| ENSG00000235609 | ENSG00000155307 |
| ENSG00000281903 | ENSG00000155307 |
| ENSG00000215386 | ENSG00000155313 |
| ENSG00000228798 | ENSG00000155313 |
| ENSG00000231201 | ENSG00000155313 |
| ENSG00000235609 | ENSG00000155313 |
| ENSG00000281903 | ENSG00000155313 |
| ENSG00000250602 | ENSG00000155324 |
| ENSG00000226419 | ENSG00000155363 |
| ENSG00000238198 | ENSG00000155363 |

|                 |                 |
|-----------------|-----------------|
| ENSG00000238198 | ENSG00000155367 |
| ENSG00000224167 | ENSG00000155380 |
| ENSG00000226419 | ENSG00000155380 |
| ENSG00000238198 | ENSG00000155380 |
| ENSG00000259843 | ENSG00000155393 |
| ENSG00000260381 | ENSG00000155393 |
| ENSG00000258458 | ENSG00000155463 |
| ENSG00000235635 | ENSG00000155542 |
| ENSG00000271828 | ENSG00000155542 |
| ENSG00000271828 | ENSG00000155545 |
| ENSG00000225434 | ENSG00000155621 |
| ENSG00000226688 | ENSG00000155629 |
| ENSG00000237298 | ENSG00000155657 |
| ENSG00000133624 | ENSG00000155660 |
| ENSG00000226312 | ENSG00000155729 |
| ENSG00000230408 | ENSG00000155744 |
| ENSG00000232133 | ENSG00000155744 |
| ENSG00000253406 | ENSG00000155850 |
| ENSG00000249417 | ENSG00000155893 |
| ENSG00000249417 | ENSG00000155903 |
| ENSG00000241749 | ENSG00000155957 |
| ENSG00000250748 | ENSG00000155957 |
| ENSG00000228986 | ENSG00000155959 |
| ENSG00000258891 | ENSG00000156030 |
| ENSG00000258603 | ENSG00000156050 |
| ENSG00000258891 | ENSG00000156050 |
| ENSG00000227963 | ENSG00000156097 |
| ENSG00000228703 | ENSG00000156097 |
| ENSG00000240194 | ENSG00000156097 |
| ENSG00000241720 | ENSG00000156097 |
| ENSG00000254942 | ENSG00000156097 |
| ENSG00000253553 | ENSG00000156103 |
| ENSG00000259138 | ENSG00000156127 |
| ENSG00000259429 | ENSG00000156232 |
| ENSG00000274376 | ENSG00000156232 |
| ENSG00000232855 | ENSG00000156239 |
| ENSG00000232855 | ENSG00000156253 |
| ENSG00000251556 | ENSG00000156463 |
| ENSG00000229852 | ENSG00000156508 |
| ENSG00000229261 | ENSG00000156510 |
| ENSG00000227060 | ENSG00000156531 |
| ENSG00000254602 | ENSG00000156587 |
| ENSG00000254602 | ENSG00000156599 |
| ENSG00000260898 | ENSG00000156642 |
| ENSG00000277749 | ENSG00000156642 |
| ENSG00000237149 | ENSG00000156671 |
| ENSG00000253161 | ENSG00000156675 |
| ENSG00000253356 | ENSG00000156675 |

|                 |                 |
|-----------------|-----------------|
| ENSG00000246982 | ENSG00000156711 |
| ENSG00000253607 | ENSG00000156802 |
| ENSG00000254294 | ENSG00000156802 |
| ENSG00000245149 | ENSG00000156804 |
| ENSG00000253607 | ENSG00000156804 |
| ENSG00000260911 | ENSG00000156860 |
| ENSG00000261346 | ENSG00000156860 |
| ENSG00000260083 | ENSG00000156873 |
| ENSG00000261346 | ENSG00000156873 |
| ENSG00000262721 | ENSG00000156873 |
| ENSG00000259488 | ENSG00000156958 |
| ENSG00000259705 | ENSG00000156958 |
| ENSG00000183458 | ENSG00000156968 |
| ENSG00000250251 | ENSG00000156968 |
| ENSG00000270580 | ENSG00000156968 |
| ENSG00000227033 | ENSG00000156973 |
| ENSG00000237126 | ENSG00000156973 |
| ENSG00000235257 | ENSG00000157036 |
| ENSG00000229739 | ENSG00000157181 |
| ENSG00000226754 | ENSG00000157193 |
| ENSG00000225498 | ENSG00000157214 |
| ENSG00000157306 | ENSG00000157227 |
| ENSG00000251002 | ENSG00000157227 |
| ENSG00000258458 | ENSG00000157227 |
| ENSG00000258727 | ENSG00000157227 |
| ENSG00000225498 | ENSG00000157240 |
| ENSG00000244055 | ENSG00000157259 |
| ENSG00000196696 | ENSG00000157315 |
| ENSG00000261556 | ENSG00000157315 |
| ENSG00000261777 | ENSG00000157315 |
| ENSG00000215256 | ENSG00000157326 |
| ENSG00000232909 | ENSG00000157343 |
| ENSG00000246982 | ENSG00000157343 |
| ENSG00000196696 | ENSG00000157349 |
| ENSG00000261777 | ENSG00000157349 |
| ENSG00000196696 | ENSG00000157350 |
| ENSG00000214353 | ENSG00000157353 |
| ENSG00000261777 | ENSG00000157353 |
| ENSG00000236188 | ENSG00000157399 |
| ENSG00000245067 | ENSG00000157426 |
| ENSG00000248590 | ENSG00000157426 |
| ENSG00000259732 | ENSG00000157483 |
| ENSG00000259771 | ENSG00000157483 |
| ENSG00000253406 | ENSG00000157510 |
| ENSG00000184809 | ENSG00000157557 |
| ENSG00000225330 | ENSG00000157557 |
| ENSG00000237686 | ENSG00000157593 |
| ENSG00000272114 | ENSG00000157593 |

|                 |                 |
|-----------------|-----------------|
| ENSG00000228318 | ENSG00000157601 |
| ENSG00000205794 | ENSG00000157796 |
| ENSG00000249348 | ENSG00000157796 |
| ENSG00000238164 | ENSG00000157870 |
| ENSG00000227775 | ENSG00000157873 |
| ENSG00000238164 | ENSG00000157873 |
| ENSG00000268575 | ENSG00000157873 |
| ENSG00000227775 | ENSG00000157881 |
| ENSG00000268575 | ENSG00000157881 |
| ENSG00000268575 | ENSG00000157911 |
| ENSG00000227775 | ENSG00000157916 |
| ENSG00000268575 | ENSG00000157916 |
| ENSG00000234072 | ENSG00000157992 |
| ENSG00000253716 | ENSG00000158106 |
| ENSG00000254973 | ENSG00000158106 |
| ENSG00000175611 | ENSG00000158122 |
| ENSG00000204685 | ENSG00000158158 |
| ENSG00000228486 | ENSG00000158158 |
| ENSG00000230606 | ENSG00000158158 |
| ENSG00000244578 | ENSG00000158186 |
| ENSG00000248932 | ENSG00000158258 |
| ENSG00000233382 | ENSG00000158290 |
| ENSG00000258545 | ENSG00000158290 |
| ENSG00000231154 | ENSG00000158301 |
| ENSG00000270050 | ENSG00000158301 |
| ENSG00000271147 | ENSG00000158301 |
| ENSG00000224843 | ENSG00000158373 |
| ENSG00000261353 | ENSG00000158373 |
| ENSG00000224843 | ENSG00000158406 |
| ENSG00000254363 | ENSG00000158458 |
| ENSG00000240758 | ENSG00000158467 |
| ENSG00000280828 | ENSG00000158467 |
| ENSG00000203999 | ENSG00000158470 |
| ENSG00000176320 | ENSG00000158473 |
| ENSG00000225670 | ENSG00000158481 |
| ENSG00000127957 | ENSG00000158517 |
| ENSG00000232729 | ENSG00000158517 |
| ENSG00000277053 | ENSG00000158517 |
| ENSG00000278416 | ENSG00000158517 |
| ENSG00000231170 | ENSG00000158560 |
| ENSG00000214783 | ENSG00000158604 |
| ENSG00000273432 | ENSG00000158604 |
| ENSG00000226045 | ENSG00000158623 |
| ENSG00000231721 | ENSG00000158623 |
| ENSG00000228863 | ENSG00000158710 |
| ENSG00000228863 | ENSG00000158716 |
| ENSG00000198358 | ENSG00000158769 |
| ENSG00000228863 | ENSG00000158773 |

|                 |                 |
|-----------------|-----------------|
| ENSG00000222019 | ENSG00000158792 |
| ENSG00000223959 | ENSG00000158792 |
| ENSG00000260259 | ENSG00000158792 |
| ENSG00000267048 | ENSG00000158792 |
| ENSG00000224985 | ENSG00000158793 |
| ENSG00000222019 | ENSG00000158805 |
| ENSG00000117242 | ENSG00000158828 |
| ENSG00000228863 | ENSG00000158859 |
| ENSG00000232879 | ENSG00000158859 |
| ENSG00000253125 | ENSG00000158863 |
| ENSG00000198358 | ENSG00000158869 |
| ENSG00000198358 | ENSG00000158882 |
| ENSG00000253125 | ENSG00000158941 |
| ENSG00000253483 | ENSG00000158941 |
| ENSG00000261026 | ENSG00000158941 |
| ENSG00000228782 | ENSG00000158955 |
| ENSG00000262879 | ENSG00000158955 |
| ENSG00000263142 | ENSG00000158955 |
| ENSG00000223949 | ENSG00000158966 |
| ENSG00000224431 | ENSG00000158985 |
| ENSG00000273066 | ENSG00000159069 |
| ENSG00000205930 | ENSG00000159086 |
| ENSG00000238197 | ENSG00000159086 |
| ENSG00000264019 | ENSG00000159111 |
| ENSG00000205930 | ENSG00000159131 |
| ENSG00000227456 | ENSG00000159131 |
| ENSG00000237945 | ENSG00000159131 |
| ENSG00000205930 | ENSG00000159140 |
| ENSG00000227456 | ENSG00000159140 |
| ENSG00000237945 | ENSG00000159140 |
| ENSG00000205930 | ENSG00000159147 |
| ENSG00000237945 | ENSG00000159147 |
| ENSG00000233030 | ENSG00000159164 |
| ENSG00000245025 | ENSG00000159167 |
| ENSG00000253837 | ENSG00000159167 |
| ENSG00000231871 | ENSG00000159176 |
| ENSG00000234678 | ENSG00000159176 |
| ENSG00000235121 | ENSG00000159176 |
| ENSG00000243323 | ENSG00000159176 |
| ENSG00000230532 | ENSG00000159202 |
| ENSG00000230532 | ENSG00000159210 |
| ENSG00000234380 | ENSG00000159212 |
| ENSG00000237945 | ENSG00000159212 |
| ENSG00000230615 | ENSG00000159214 |
| ENSG00000234703 | ENSG00000159216 |
| ENSG00000230212 | ENSG00000159228 |
| ENSG00000236209 | ENSG00000159239 |
| ENSG00000237737 | ENSG00000159239 |

|                 |                 |
|-----------------|-----------------|
| ENSG00000248079 | ENSG00000159251 |
| ENSG00000259287 | ENSG00000159251 |
| ENSG00000242553 | ENSG00000159256 |
| ENSG00000224790 | ENSG00000159263 |
| ENSG00000230212 | ENSG00000159263 |
| ENSG00000224790 | ENSG00000159267 |
| ENSG00000230212 | ENSG00000159267 |
| ENSG00000234892 | ENSG00000159307 |
| ENSG00000204650 | ENSG00000159314 |
| ENSG00000236234 | ENSG00000159314 |
| ENSG00000261575 | ENSG00000159314 |
| ENSG00000267121 | ENSG00000159314 |
| ENSG00000267278 | ENSG00000159314 |
| ENSG00000243323 | ENSG00000159346 |
| ENSG00000234678 | ENSG00000159348 |
| ENSG00000243323 | ENSG00000159348 |
| ENSG00000224645 | ENSG00000159352 |
| ENSG00000229021 | ENSG00000159352 |
| ENSG00000237781 | ENSG00000159352 |
| ENSG00000237975 | ENSG00000159352 |
| ENSG00000226526 | ENSG00000159363 |
| ENSG00000268869 | ENSG00000159363 |
| ENSG00000236209 | ENSG00000159399 |
| ENSG00000205885 | ENSG00000159403 |
| ENSG00000230424 | ENSG00000159423 |
| ENSG00000246283 | ENSG00000159433 |
| ENSG00000258461 | ENSG00000159433 |
| ENSG00000229021 | ENSG00000159445 |
| ENSG00000234614 | ENSG00000159445 |
| ENSG00000237975 | ENSG00000159445 |
| ENSG00000205771 | ENSG00000159459 |
| ENSG00000258461 | ENSG00000159459 |
| ENSG00000261822 | ENSG00000159459 |
| ENSG00000133519 | ENSG00000159496 |
| ENSG00000178248 | ENSG00000159496 |
| ENSG00000211683 | ENSG00000159496 |
| ENSG00000234353 | ENSG00000159496 |
| ENSG00000244723 | ENSG00000159496 |
| ENSG00000272578 | ENSG00000159496 |
| ENSG00000273000 | ENSG00000159496 |
| ENSG00000232022 | ENSG00000159588 |
| ENSG00000233635 | ENSG00000159640 |
| ENSG00000196810 | ENSG00000159674 |
| ENSG00000248416 | ENSG00000159674 |
| ENSG00000196810 | ENSG00000159692 |
| ENSG00000272588 | ENSG00000159692 |
| ENSG00000270049 | ENSG00000159714 |
| ENSG00000276075 | ENSG00000159714 |

|                 |                 |
|-----------------|-----------------|
| ENSG00000263276 | ENSG00000159720 |
| ENSG00000270049 | ENSG00000159720 |
| ENSG00000270165 | ENSG00000159753 |
| ENSG00000276075 | ENSG00000159761 |
| ENSG00000159860 | ENSG00000159784 |
| ENSG00000229153 | ENSG00000159784 |
| ENSG00000231840 | ENSG00000159784 |
| ENSG00000244198 | ENSG00000159784 |
| ENSG00000244479 | ENSG00000159784 |
| ENSG00000253882 | ENSG00000159784 |
| ENSG00000251669 | ENSG00000159788 |
| ENSG00000261643 | ENSG00000159788 |
| ENSG00000270049 | ENSG00000159792 |
| ENSG00000159860 | ENSG00000159840 |
| ENSG00000229153 | ENSG00000159840 |
| ENSG00000231840 | ENSG00000159840 |
| ENSG00000253882 | ENSG00000159840 |
| ENSG00000225465 | ENSG00000159873 |
| ENSG00000226471 | ENSG00000159873 |
| ENSG00000235954 | ENSG00000159873 |
| ENSG00000176761 | ENSG00000159882 |
| ENSG00000266903 | ENSG00000159882 |
| ENSG00000230074 | ENSG00000159884 |
| ENSG00000227388 | ENSG00000159899 |
| ENSG00000228843 | ENSG00000159899 |
| ENSG00000266903 | ENSG00000159905 |
| ENSG00000266903 | ENSG00000159915 |
| ENSG00000237037 | ENSG00000159958 |
| ENSG00000268460 | ENSG00000160007 |
| ENSG00000268460 | ENSG00000160014 |
| ENSG00000220785 | ENSG00000160050 |
| ENSG00000220785 | ENSG00000160051 |
| ENSG00000235790 | ENSG00000160051 |
| ENSG00000236065 | ENSG00000160051 |
| ENSG00000235790 | ENSG00000160055 |
| ENSG00000220785 | ENSG00000160062 |
| ENSG00000236065 | ENSG00000160062 |
| ENSG00000254545 | ENSG00000160062 |
| ENSG00000215014 | ENSG00000160075 |
| ENSG00000237491 | ENSG00000160075 |
| ENSG00000268575 | ENSG00000160075 |
| ENSG00000227775 | ENSG00000160087 |
| ENSG00000268575 | ENSG00000160087 |
| ENSG00000272512 | ENSG00000160087 |
| ENSG00000269439 | ENSG00000160111 |
| ENSG00000254503 | ENSG00000160117 |
| ENSG00000269399 | ENSG00000160117 |
| ENSG00000269439 | ENSG00000160117 |



|                 |                 |
|-----------------|-----------------|
| ENSG00000269481 | ENSG00000160117 |
| ENSG00000273033 | ENSG00000160124 |
| ENSG00000231205 | ENSG00000160161 |
| ENSG00000267419 | ENSG00000160161 |
| ENSG00000269019 | ENSG00000160161 |
| ENSG00000233056 | ENSG00000160193 |
| ENSG00000233056 | ENSG00000160194 |
| ENSG00000237989 | ENSG00000160201 |
| ENSG00000237989 | ENSG00000160208 |
| ENSG00000215458 | ENSG00000160209 |
| ENSG00000228986 | ENSG00000160211 |
| ENSG00000232725 | ENSG00000160211 |
| ENSG00000260081 | ENSG00000160211 |
| ENSG00000215458 | ENSG00000160213 |
| ENSG00000215458 | ENSG00000160214 |
| ENSG00000215458 | ENSG00000160218 |
| ENSG00000184844 | ENSG00000160219 |
| ENSG00000232725 | ENSG00000160219 |
| ENSG00000184441 | ENSG00000160226 |
| ENSG00000182586 | ENSG00000160233 |
| ENSG00000183535 | ENSG00000160233 |
| ENSG00000182586 | ENSG00000160256 |
| ENSG00000183250 | ENSG00000160256 |
| ENSG00000183535 | ENSG00000160256 |
| ENSG00000228404 | ENSG00000160284 |
| ENSG00000215424 | ENSG00000160285 |
| ENSG00000223901 | ENSG00000160285 |
| ENSG00000228404 | ENSG00000160285 |
| ENSG00000215424 | ENSG00000160294 |
| ENSG00000215424 | ENSG00000160298 |
| ENSG00000228404 | ENSG00000160298 |
| ENSG00000183535 | ENSG00000160299 |
| ENSG00000215424 | ENSG00000160299 |
| ENSG00000228404 | ENSG00000160299 |
| ENSG00000215424 | ENSG00000160307 |
| ENSG00000224413 | ENSG00000160310 |
| ENSG00000268081 | ENSG00000160321 |
| ENSG00000268555 | ENSG00000160321 |
| ENSG00000268658 | ENSG00000160321 |
| ENSG00000225361 | ENSG00000160345 |
| ENSG00000237339 | ENSG00000160345 |
| ENSG00000231205 | ENSG00000160352 |
| ENSG00000268278 | ENSG00000160352 |
| ENSG00000237339 | ENSG00000160360 |
| ENSG00000228395 | ENSG00000160401 |
| ENSG00000232850 | ENSG00000160401 |
| ENSG00000257524 | ENSG00000160401 |
| ENSG00000234771 | ENSG00000160408 |

|                 |                 |
|-----------------|-----------------|
| ENSG00000257524 | ENSG00000160408 |
| ENSG00000237118 | ENSG00000160410 |
| ENSG00000267107 | ENSG00000160410 |
| ENSG00000204054 | ENSG00000160445 |
| ENSG00000228395 | ENSG00000160445 |
| ENSG00000257524 | ENSG00000160445 |
| ENSG00000264031 | ENSG00000160551 |
| ENSG00000213904 | ENSG00000160570 |
| ENSG00000267107 | ENSG00000160570 |
| ENSG00000254528 | ENSG00000160584 |
| ENSG00000254851 | ENSG00000160584 |
| ENSG00000255422 | ENSG00000160593 |
| ENSG00000227543 | ENSG00000160602 |
| ENSG00000264031 | ENSG00000160602 |
| ENSG00000265845 | ENSG00000160602 |
| ENSG00000254528 | ENSG00000160613 |
| ENSG00000272030 | ENSG00000160678 |
| ENSG00000272030 | ENSG00000160679 |
| ENSG00000225855 | ENSG00000160685 |
| ENSG00000246203 | ENSG00000160685 |
| ENSG00000246203 | ENSG00000160691 |
| ENSG00000255114 | ENSG00000160695 |
| ENSG00000255422 | ENSG00000160703 |
| ENSG00000246203 | ENSG00000160710 |
| ENSG00000231064 | ENSG00000160752 |
| ENSG00000246203 | ENSG00000160753 |
| ENSG00000160766 | ENSG00000160767 |
| ENSG00000236675 | ENSG00000160767 |
| ENSG00000229953 | ENSG00000160781 |
| ENSG00000229953 | ENSG00000160783 |
| ENSG00000246203 | ENSG00000160783 |
| ENSG00000246203 | ENSG00000160785 |
| ENSG00000246203 | ENSG00000160789 |
| ENSG00000227398 | ENSG00000160796 |
| ENSG00000227398 | ENSG00000160799 |
| ENSG00000236947 | ENSG00000160803 |
| ENSG00000246203 | ENSG00000160803 |
| ENSG00000224729 | ENSG00000160862 |
| ENSG00000248596 | ENSG00000160867 |
| ENSG00000267512 | ENSG00000160877 |
| ENSG00000266897 | ENSG00000160888 |
| ENSG00000078319 | ENSG00000160908 |
| ENSG00000242294 | ENSG00000160908 |
| ENSG00000244219 | ENSG00000160908 |
| ENSG00000272752 | ENSG00000160908 |
| ENSG00000247317 | ENSG00000160932 |
| ENSG00000266933 | ENSG00000160953 |
| ENSG00000280486 | ENSG00000160953 |

|                 |                 |
|-----------------|-----------------|
| ENSG00000254548 | ENSG00000160959 |
| ENSG00000255085 | ENSG00000160959 |
| ENSG00000255182 | ENSG00000160972 |
| ENSG00000196922 | ENSG00000160973 |
| ENSG00000232600 | ENSG00000160973 |
| ENSG00000239486 | ENSG00000160991 |
| ENSG00000170629 | ENSG00000160999 |
| ENSG00000254035 | ENSG00000161011 |
| ENSG00000254035 | ENSG00000161021 |
| ENSG00000239486 | ENSG00000161036 |
| ENSG00000170629 | ENSG00000161048 |
| ENSG00000230257 | ENSG00000161048 |
| ENSG00000170629 | ENSG00000161057 |
| ENSG00000267436 | ENSG00000161091 |
| ENSG00000230513 | ENSG00000161179 |
| ENSG00000279278 | ENSG00000161179 |
| ENSG00000233885 | ENSG00000161204 |
| ENSG00000185485 | ENSG00000161217 |
| ENSG00000205786 | ENSG00000161277 |
| ENSG00000225872 | ENSG00000161277 |
| ENSG00000267698 | ENSG00000161277 |
| ENSG00000267309 | ENSG00000161298 |
| ENSG00000267698 | ENSG00000161298 |
| ENSG00000255158 | ENSG00000161328 |
| ENSG00000255284 | ENSG00000161328 |
| ENSG00000269915 | ENSG00000161328 |
| ENSG00000266101 | ENSG00000161395 |
| ENSG00000267546 | ENSG00000161526 |
| ENSG00000267801 | ENSG00000161526 |
| ENSG00000266980 | ENSG00000161533 |
| ENSG00000260160 | ENSG00000161551 |
| ENSG00000248265 | ENSG00000161638 |
| ENSG00000258086 | ENSG00000161638 |
| ENSG00000131401 | ENSG00000161640 |
| ENSG00000161643 | ENSG00000161640 |
| ENSG00000180279 | ENSG00000161640 |
| ENSG00000268006 | ENSG00000161640 |
| ENSG00000248265 | ENSG00000161642 |
| ENSG00000258086 | ENSG00000161642 |
| ENSG00000213373 | ENSG00000161647 |
| ENSG00000267002 | ENSG00000161654 |
| ENSG00000267002 | ENSG00000161664 |
| ENSG00000267080 | ENSG00000161664 |
| ENSG00000267394 | ENSG00000161664 |
| ENSG00000268047 | ENSG00000161671 |
| ENSG00000267121 | ENSG00000161682 |
| ENSG00000267278 | ENSG00000161682 |
| ENSG00000204650 | ENSG00000161714 |

|                 |                 |
|-----------------|-----------------|
| ENSG00000267121 | ENSG00000161714 |
| ENSG00000267394 | ENSG00000161714 |
| ENSG00000257346 | ENSG00000161791 |
| ENSG00000257588 | ENSG00000161791 |
| ENSG00000258017 | ENSG00000161791 |
| ENSG00000257378 | ENSG00000161798 |
| ENSG00000257588 | ENSG00000161798 |
| ENSG00000258057 | ENSG00000161798 |
| ENSG00000257378 | ENSG00000161813 |
| ENSG00000257588 | ENSG00000161813 |
| ENSG00000258057 | ENSG00000161813 |
| ENSG00000272368 | ENSG00000161813 |
| ENSG00000266978 | ENSG00000161847 |
| ENSG00000267106 | ENSG00000161847 |
| ENSG00000274425 | ENSG00000161847 |
| ENSG00000219665 | ENSG00000161914 |
| ENSG00000234327 | ENSG00000161929 |
| ENSG00000261879 | ENSG00000161929 |
| ENSG00000215067 | ENSG00000161940 |
| ENSG00000263171 | ENSG00000161940 |
| ENSG00000264772 | ENSG00000161940 |
| ENSG00000215067 | ENSG00000161955 |
| ENSG00000264772 | ENSG00000161955 |
| ENSG00000215067 | ENSG00000161956 |
| ENSG00000256806 | ENSG00000161956 |
| ENSG00000264772 | ENSG00000161956 |
| ENSG00000215067 | ENSG00000161958 |
| ENSG00000263301 | ENSG00000161958 |
| ENSG00000215067 | ENSG00000161960 |
| ENSG00000256806 | ENSG00000161960 |
| ENSG00000260394 | ENSG00000161980 |
| ENSG00000260394 | ENSG00000161999 |
| ENSG00000261659 | ENSG00000161999 |
| ENSG00000261691 | ENSG00000161999 |
| ENSG00000236829 | ENSG00000162004 |
| ENSG00000260022 | ENSG00000162004 |
| ENSG00000260807 | ENSG00000162004 |
| ENSG00000260293 | ENSG00000162032 |
| ENSG00000260293 | ENSG00000162065 |
| ENSG00000215154 | ENSG00000162066 |
| ENSG00000260565 | ENSG00000162066 |
| ENSG00000261093 | ENSG00000162066 |
| ENSG00000262370 | ENSG00000162066 |
| ENSG00000263072 | ENSG00000162066 |
| ENSG00000281005 | ENSG00000162086 |
| ENSG00000260401 | ENSG00000162129 |
| ENSG00000241170 | ENSG00000162139 |
| ENSG00000243742 | ENSG00000162144 |

|                 |                 |
|-----------------|-----------------|
| ENSG00000124915 | ENSG00000162188 |
| ENSG00000256789 | ENSG00000162227 |
| ENSG00000173727 | ENSG00000162241 |
| ENSG00000245532 | ENSG00000162241 |
| ENSG00000255478 | ENSG00000162241 |
| ENSG00000242797 | ENSG00000162267 |
| ENSG00000255200 | ENSG00000162302 |
| ENSG00000256789 | ENSG00000162302 |
| ENSG00000225762 | ENSG00000162368 |
| ENSG00000232022 | ENSG00000162368 |
| ENSG00000266993 | ENSG00000162377 |
| ENSG00000232993 | ENSG00000162378 |
| ENSG00000266993 | ENSG00000162378 |
| ENSG00000226754 | ENSG00000162384 |
| ENSG00000198711 | ENSG00000162402 |
| ENSG00000228526 | ENSG00000162426 |
| ENSG00000234546 | ENSG00000162426 |
| ENSG00000228526 | ENSG00000162444 |
| ENSG00000268869 | ENSG00000162458 |
| ENSG00000224459 | ENSG00000162461 |
| ENSG00000237938 | ENSG00000162461 |
| ENSG00000186056 | ENSG00000162511 |
| ENSG00000186056 | ENSG00000162512 |
| ENSG00000223382 | ENSG00000162512 |
| ENSG00000186056 | ENSG00000162517 |
| ENSG00000235790 | ENSG00000162517 |
| ENSG00000225313 | ENSG00000162520 |
| ENSG00000236065 | ENSG00000162522 |
| ENSG00000225313 | ENSG00000162526 |
| ENSG00000227066 | ENSG00000162542 |
| ENSG00000226396 | ENSG00000162543 |
| ENSG00000117242 | ENSG00000162545 |
| ENSG00000230415 | ENSG00000162572 |
| ENSG00000268575 | ENSG00000162572 |
| ENSG00000177757 | ENSG00000162576 |
| ENSG00000217801 | ENSG00000162576 |
| ENSG00000230092 | ENSG00000162576 |
| ENSG00000230699 | ENSG00000162576 |
| ENSG00000237491 | ENSG00000162576 |
| ENSG00000271806 | ENSG00000162585 |
| ENSG00000177133 | ENSG00000162591 |
| ENSG00000235927 | ENSG00000162613 |
| ENSG00000235927 | ENSG00000162614 |
| ENSG00000225206 | ENSG00000162627 |
| ENSG00000254942 | ENSG00000162636 |
| ENSG00000260879 | ENSG00000162636 |
| ENSG00000122432 | ENSG00000162642 |
| ENSG00000223653 | ENSG00000162642 |

|                 |                 |
|-----------------|-----------------|
| ENSG00000282057 | ENSG00000162642 |
| ENSG00000225492 | ENSG00000162645 |
| ENSG00000230735 | ENSG00000162645 |
| ENSG00000231999 | ENSG00000162645 |
| ENSG00000237505 | ENSG00000162645 |
| ENSG00000240194 | ENSG00000162650 |
| ENSG00000241720 | ENSG00000162650 |
| ENSG00000230735 | ENSG00000162654 |
| ENSG00000237505 | ENSG00000162654 |
| ENSG00000231999 | ENSG00000162664 |
| ENSG00000233593 | ENSG00000162664 |
| ENSG00000233184 | ENSG00000162692 |
| ENSG00000233184 | ENSG00000162694 |
| ENSG00000233184 | ENSG00000162695 |
| ENSG00000221953 | ENSG00000162711 |
| ENSG00000223519 | ENSG00000162711 |
| ENSG00000227953 | ENSG00000162711 |
| ENSG00000260766 | ENSG00000162729 |
| ENSG00000227741 | ENSG00000162734 |
| ENSG00000228863 | ENSG00000162734 |
| ENSG00000232188 | ENSG00000162734 |
| ENSG00000198358 | ENSG00000162736 |
| ENSG00000224259 | ENSG00000162736 |
| ENSG00000198358 | ENSG00000162738 |
| ENSG00000228863 | ENSG00000162738 |
| ENSG00000198358 | ENSG00000162747 |
| ENSG00000228863 | ENSG00000162747 |
| ENSG00000227811 | ENSG00000162777 |
| ENSG00000227963 | ENSG00000162777 |
| ENSG00000232586 | ENSG00000162783 |
| ENSG00000243155 | ENSG00000162783 |
| ENSG00000224272 | ENSG00000162804 |
| ENSG00000227479 | ENSG00000162804 |
| ENSG00000233392 | ENSG00000162804 |
| ENSG00000233806 | ENSG00000162804 |
| ENSG00000223804 | ENSG00000162825 |
| ENSG00000226235 | ENSG00000162873 |
| ENSG00000281406 | ENSG00000162873 |
| ENSG00000203327 | ENSG00000162994 |
| ENSG00000227799 | ENSG00000162994 |
| ENSG00000257800 | ENSG00000163013 |
| ENSG00000152117 | ENSG00000163040 |
| ENSG00000225963 | ENSG00000163053 |
| ENSG00000248115 | ENSG00000163069 |
| ENSG00000231013 | ENSG00000163083 |
| ENSG00000228486 | ENSG00000163126 |
| ENSG00000203804 | ENSG00000163131 |
| ENSG00000237781 | ENSG00000163131 |

|                 |                 |
|-----------------|-----------------|
| ENSG00000203804 | ENSG00000163154 |
| ENSG00000229021 | ENSG00000163154 |
| ENSG00000249602 | ENSG00000163154 |
| ENSG00000203804 | ENSG00000163155 |
| ENSG00000229021 | ENSG00000163155 |
| ENSG00000234614 | ENSG00000163155 |
| ENSG00000249602 | ENSG00000163155 |
| ENSG00000203288 | ENSG00000163156 |
| ENSG00000203804 | ENSG00000163156 |
| ENSG00000229021 | ENSG00000163156 |
| ENSG00000249602 | ENSG00000163156 |
| ENSG00000236682 | ENSG00000163161 |
| ENSG00000225439 | ENSG00000163170 |
| ENSG00000236209 | ENSG00000163170 |
| ENSG00000257800 | ENSG00000163170 |
| ENSG00000229021 | ENSG00000163191 |
| ENSG00000234614 | ENSG00000163191 |
| ENSG00000237975 | ENSG00000163191 |
| ENSG00000229692 | ENSG00000163214 |
| ENSG00000231367 | ENSG00000163214 |
| ENSG00000232973 | ENSG00000163214 |
| ENSG00000235848 | ENSG00000163214 |
| ENSG00000237008 | ENSG00000163220 |
| ENSG00000237975 | ENSG00000163221 |
| ENSG00000223725 | ENSG00000163251 |
| ENSG00000237798 | ENSG00000163328 |
| ENSG00000226266 | ENSG00000163331 |
| ENSG00000225855 | ENSG00000163344 |
| ENSG00000226167 | ENSG00000163349 |
| ENSG00000238198 | ENSG00000163349 |
| ENSG00000225057 | ENSG00000163359 |
| ENSG00000203865 | ENSG00000163399 |
| ENSG00000242622 | ENSG00000163428 |
| ENSG00000242622 | ENSG00000163430 |
| ENSG00000231871 | ENSG00000163431 |
| ENSG00000235121 | ENSG00000163431 |
| ENSG00000234678 | ENSG00000163444 |
| ENSG00000245067 | ENSG00000163453 |
| ENSG00000160766 | ENSG00000163463 |
| ENSG00000229780 | ENSG00000163463 |
| ENSG00000236263 | ENSG00000163463 |
| ENSG00000246203 | ENSG00000163463 |
| ENSG00000246203 | ENSG00000163467 |
| ENSG00000229953 | ENSG00000163472 |
| ENSG00000236947 | ENSG00000163472 |
| ENSG00000236947 | ENSG00000163479 |
| ENSG00000246203 | ENSG00000163479 |
| ENSG00000229754 | ENSG00000163481 |

|                 |                 |
|-----------------|-----------------|
| ENSG00000229754 | ENSG00000163482 |
| ENSG00000255021 | ENSG00000163517 |
| ENSG00000255021 | ENSG00000163528 |
| ENSG00000225670 | ENSG00000163563 |
| ENSG00000225670 | ENSG00000163565 |
| ENSG00000225670 | ENSG00000163568 |
| ENSG00000241163 | ENSG00000163602 |
| ENSG00000224479 | ENSG00000163635 |
| ENSG00000241684 | ENSG00000163635 |
| ENSG00000272181 | ENSG00000163635 |
| ENSG00000239653 | ENSG00000163636 |
| ENSG00000241158 | ENSG00000163636 |
| ENSG00000241684 | ENSG00000163636 |
| ENSG00000241111 | ENSG00000163638 |
| ENSG00000241684 | ENSG00000163638 |
| ENSG00000240875 | ENSG00000163655 |
| ENSG00000243176 | ENSG00000163660 |
| ENSG00000243629 | ENSG00000163660 |
| ENSG00000240875 | ENSG00000163661 |
| ENSG00000243176 | ENSG00000163661 |
| ENSG00000239801 | ENSG00000163681 |
| ENSG00000244383 | ENSG00000163681 |
| ENSG00000249348 | ENSG00000163683 |
| ENSG00000244383 | ENSG00000163686 |
| ENSG00000242428 | ENSG00000163689 |
| ENSG00000244383 | ENSG00000163689 |
| ENSG00000206573 | ENSG00000163701 |
| ENSG00000206573 | ENSG00000163702 |
| ENSG00000206573 | ENSG00000163703 |
| ENSG00000206573 | ENSG00000163704 |
| ENSG00000241570 | ENSG00000163714 |
| ENSG00000244171 | ENSG00000163714 |
| ENSG00000206573 | ENSG00000163719 |
| ENSG00000239880 | ENSG00000163728 |
| ENSG00000249942 | ENSG00000163734 |
| ENSG00000249942 | ENSG00000163735 |
| ENSG00000249942 | ENSG00000163738 |
| ENSG00000269559 | ENSG00000163738 |
| ENSG00000249942 | ENSG00000163739 |
| ENSG00000242337 | ENSG00000163781 |
| ENSG00000248724 | ENSG00000163781 |
| ENSG00000242337 | ENSG00000163785 |
| ENSG00000236869 | ENSG00000163814 |
| ENSG00000227398 | ENSG00000163827 |
| ENSG00000227398 | ENSG00000163832 |
| ENSG00000241014 | ENSG00000163867 |
| ENSG00000241278 | ENSG00000163884 |
| ENSG00000241288 | ENSG00000163884 |



|                 |                 |
|-----------------|-----------------|
| ENSG00000250934 | ENSG00000163884 |
| ENSG00000251448 | ENSG00000163884 |
| ENSG00000163915 | ENSG00000163904 |
| ENSG00000223358 | ENSG00000163904 |
| ENSG00000182109 | ENSG00000163909 |
| ENSG00000244932 | ENSG00000163913 |
| ENSG00000251474 | ENSG00000163913 |
| ENSG00000253540 | ENSG00000163913 |
| ENSG00000242797 | ENSG00000163930 |
| ENSG00000196810 | ENSG00000163945 |
| ENSG00000249673 | ENSG00000163956 |
| ENSG00000185485 | ENSG00000163960 |
| ENSG00000185485 | ENSG00000163964 |
| ENSG00000228192 | ENSG00000164010 |
| ENSG00000228192 | ENSG00000164011 |
| ENSG00000245322 | ENSG00000164024 |
| ENSG00000246090 | ENSG00000164024 |
| ENSG00000260641 | ENSG00000164024 |
| ENSG00000272777 | ENSG00000164024 |
| ENSG00000245322 | ENSG00000164031 |
| ENSG00000246090 | ENSG00000164031 |
| ENSG00000245322 | ENSG00000164032 |
| ENSG00000246090 | ENSG00000164032 |
| ENSG00000248161 | ENSG00000164038 |
| ENSG00000248802 | ENSG00000164040 |
| ENSG00000251432 | ENSG00000164040 |
| ENSG00000228350 | ENSG00000164050 |
| ENSG00000270441 | ENSG00000164051 |
| ENSG00000244380 | ENSG00000164053 |
| ENSG00000248802 | ENSG00000164066 |
| ENSG00000251432 | ENSG00000164066 |
| ENSG00000235016 | ENSG00000164068 |
| ENSG00000235908 | ENSG00000164068 |
| ENSG00000251432 | ENSG00000164073 |
| ENSG00000248802 | ENSG00000164074 |
| ENSG00000251432 | ENSG00000164074 |
| ENSG00000235016 | ENSG00000164077 |
| ENSG00000242797 | ENSG00000164088 |
| ENSG00000154608 | ENSG00000164096 |
| ENSG00000250412 | ENSG00000164096 |
| ENSG00000154608 | ENSG00000164099 |
| ENSG00000260404 | ENSG00000164099 |
| ENSG00000237125 | ENSG00000164107 |
| ENSG00000248174 | ENSG00000164107 |
| ENSG00000248174 | ENSG00000164120 |
| ENSG00000248429 | ENSG00000164124 |
| ENSG00000251429 | ENSG00000164124 |
| ENSG00000248429 | ENSG00000164125 |

|                 |                 |
|-----------------|-----------------|
| ENSG00000248890 | ENSG00000164161 |
| ENSG00000248890 | ENSG00000164163 |
| ENSG00000249899 | ENSG00000164171 |
| ENSG00000249899 | ENSG00000164172 |
| ENSG00000249835 | ENSG00000164176 |
| ENSG00000250320 | ENSG00000164176 |
| ENSG00000245864 | ENSG00000164180 |
| ENSG00000247828 | ENSG00000164180 |
| ENSG00000248309 | ENSG00000164180 |
| ENSG00000248323 | ENSG00000164199 |
| ENSG00000281357 | ENSG00000164199 |
| ENSG00000246859 | ENSG00000164211 |
| ENSG00000249249 | ENSG00000164221 |
| ENSG00000272324 | ENSG00000164237 |
| ENSG00000245937 | ENSG00000164241 |
| ENSG00000250602 | ENSG00000164241 |
| ENSG00000251314 | ENSG00000164291 |
| ENSG00000251314 | ENSG00000164292 |
| ENSG00000253406 | ENSG00000164296 |
| ENSG00000250410 | ENSG00000164305 |
| ENSG00000248734 | ENSG00000164307 |
| ENSG00000247121 | ENSG00000164308 |
| ENSG00000244968 | ENSG00000164318 |
| ENSG00000249740 | ENSG00000164318 |
| ENSG00000271646 | ENSG00000164323 |
| ENSG00000244968 | ENSG00000164327 |
| ENSG00000249740 | ENSG00000164327 |
| ENSG00000250848 | ENSG00000164366 |
| ENSG00000223442 | ENSG00000164403 |
| ENSG00000230612 | ENSG00000164403 |
| ENSG00000225177 | ENSG00000164442 |
| ENSG00000231329 | ENSG00000164442 |
| ENSG00000236013 | ENSG00000164442 |
| ENSG00000253955 | ENSG00000164463 |
| ENSG00000248469 | ENSG00000164466 |
| ENSG00000233452 | ENSG00000164506 |
| ENSG00000224666 | ENSG00000164530 |
| ENSG00000246982 | ENSG00000164530 |
| ENSG00000214783 | ENSG00000164543 |
| ENSG00000273432 | ENSG00000164543 |
| ENSG00000226329 | ENSG00000164548 |
| ENSG00000254333 | ENSG00000164591 |
| ENSG00000214194 | ENSG00000164604 |
| ENSG00000228737 | ENSG00000164620 |
| ENSG00000280029 | ENSG00000164620 |
| ENSG00000187953 | ENSG00000164631 |
| ENSG00000228010 | ENSG00000164631 |
| ENSG00000230825 | ENSG00000164631 |

|                 |                 |
|-----------------|-----------------|
| ENSG00000225498 | ENSG00000164647 |
| ENSG00000187953 | ENSG00000164654 |
| ENSG00000228010 | ENSG00000164654 |
| ENSG00000272894 | ENSG00000164654 |
| ENSG00000271913 | ENSG00000164691 |
| ENSG00000237927 | ENSG00000164694 |
| ENSG00000253334 | ENSG00000164695 |
| ENSG00000255052 | ENSG00000164733 |
| ENSG00000176826 | ENSG00000164776 |
| ENSG00000251136 | ENSG00000164823 |
| ENSG00000230487 | ENSG00000164849 |
| ENSG00000229043 | ENSG00000164850 |
| ENSG00000273230 | ENSG00000164880 |
| ENSG00000244151 | ENSG00000164896 |
| ENSG00000253320 | ENSG00000164930 |
| ENSG00000253320 | ENSG00000164932 |
| ENSG00000253477 | ENSG00000164932 |
| ENSG00000254281 | ENSG00000164932 |
| ENSG00000253704 | ENSG00000164944 |
| ENSG00000248858 | ENSG00000164953 |
| ENSG00000245149 | ENSG00000164961 |
| ENSG00000226562 | ENSG00000164970 |
| ENSG00000230074 | ENSG00000164970 |
| ENSG00000235481 | ENSG00000164970 |
| ENSG00000226562 | ENSG00000164976 |
| ENSG00000230074 | ENSG00000164976 |
| ENSG00000226562 | ENSG00000165006 |
| ENSG00000233081 | ENSG00000165030 |
| ENSG00000235641 | ENSG00000165030 |
| ENSG00000260454 | ENSG00000165030 |
| ENSG00000242588 | ENSG00000165055 |
| ENSG00000273270 | ENSG00000165055 |
| ENSG00000280828 | ENSG00000165055 |
| ENSG00000281896 | ENSG00000165055 |
| ENSG00000204706 | ENSG00000165072 |
| ENSG00000225434 | ENSG00000165091 |
| ENSG00000226877 | ENSG00000165118 |
| ENSG00000231616 | ENSG00000165118 |
| ENSG00000231616 | ENSG00000165119 |
| ENSG00000235298 | ENSG00000165119 |
| ENSG00000230262 | ENSG00000165140 |
| ENSG00000269946 | ENSG00000165140 |
| ENSG00000259977 | ENSG00000165168 |
| ENSG00000259977 | ENSG00000165169 |
| ENSG00000235806 | ENSG00000165175 |
| ENSG00000228623 | ENSG00000165185 |
| ENSG00000230185 | ENSG00000165185 |
| ENSG00000259953 | ENSG00000165185 |

|                 |                 |
|-----------------|-----------------|
| ENSG00000174353 | ENSG00000165215 |
| ENSG00000248503 | ENSG00000165240 |
| ENSG00000223440 | ENSG00000165272 |
| ENSG00000226562 | ENSG00000165272 |
| ENSG00000230074 | ENSG00000165280 |
| ENSG00000228843 | ENSG00000165282 |
| ENSG00000278530 | ENSG00000165288 |
| ENSG00000227060 | ENSG00000165359 |
| ENSG00000224812 | ENSG00000165406 |
| ENSG00000237840 | ENSG00000165406 |
| ENSG00000224596 | ENSG00000165424 |
| ENSG00000235426 | ENSG00000165424 |
| ENSG00000242600 | ENSG00000165424 |
| ENSG00000256007 | ENSG00000165458 |
| ENSG00000224812 | ENSG00000165507 |
| ENSG00000214900 | ENSG00000165527 |
| ENSG00000258867 | ENSG00000165533 |
| ENSG00000258569 | ENSG00000165555 |
| ENSG00000226576 | ENSG00000165633 |
| ENSG00000229847 | ENSG00000165650 |
| ENSG00000177640 | ENSG00000165669 |
| ENSG00000231104 | ENSG00000165669 |
| ENSG00000271933 | ENSG00000165678 |
| ENSG00000256888 | ENSG00000165682 |
| ENSG00000180539 | ENSG00000165684 |
| ENSG00000180539 | ENSG00000165688 |
| ENSG00000225361 | ENSG00000165688 |
| ENSG00000231864 | ENSG00000165688 |
| ENSG00000237339 | ENSG00000165688 |
| ENSG00000237886 | ENSG00000165688 |
| ENSG00000229261 | ENSG00000165732 |
| ENSG00000166917 | ENSG00000165752 |
| ENSG00000224597 | ENSG00000165757 |
| ENSG00000228986 | ENSG00000165775 |
| ENSG00000258451 | ENSG00000165782 |
| ENSG00000258451 | ENSG00000165795 |
| ENSG00000258451 | ENSG00000165801 |
| ENSG00000258768 | ENSG00000165801 |
| ENSG00000273066 | ENSG00000165802 |
| ENSG00000258441 | ENSG00000165804 |
| ENSG00000251002 | ENSG00000165819 |
| ENSG00000258441 | ENSG00000165819 |
| ENSG00000258451 | ENSG00000165819 |
| ENSG00000170919 | ENSG00000165837 |
| ENSG00000248027 | ENSG00000165895 |
| ENSG00000282728 | ENSG00000165895 |
| ENSG00000258603 | ENSG00000165898 |
| ENSG00000255197 | ENSG00000165915 |

|                 |                 |
|-----------------|-----------------|
| ENSG00000255197 | ENSG00000165916 |
| ENSG00000247675 | ENSG00000165923 |
| ENSG00000225342 | ENSG00000165966 |
| ENSG00000255929 | ENSG00000166012 |
| ENSG00000255929 | ENSG00000166025 |
| ENSG00000256469 | ENSG00000166025 |
| ENSG00000259345 | ENSG00000166068 |
| ENSG00000259345 | ENSG00000166073 |
| ENSG00000251226 | ENSG00000166086 |
| ENSG00000259515 | ENSG00000166165 |
| ENSG00000260285 | ENSG00000166165 |
| ENSG00000260285 | ENSG00000166166 |
| ENSG00000259744 | ENSG00000166173 |
| ENSG00000260927 | ENSG00000166188 |
| ENSG00000236319 | ENSG00000166263 |
| ENSG00000262052 | ENSG00000166263 |
| ENSG00000273492 | ENSG00000166265 |
| ENSG00000226009 | ENSG00000166272 |
| ENSG00000282772 | ENSG00000166275 |
| ENSG00000206337 | ENSG00000166278 |
| ENSG00000227939 | ENSG00000166278 |
| ENSG00000229391 | ENSG00000166278 |
| ENSG00000271581 | ENSG00000166278 |
| ENSG00000236756 | ENSG00000166321 |
| ENSG00000267940 | ENSG00000166333 |
| ENSG00000254400 | ENSG00000166337 |
| ENSG00000255410 | ENSG00000166340 |
| ENSG00000255680 | ENSG00000166340 |
| ENSG00000242338 | ENSG00000166343 |
| ENSG00000271816 | ENSG00000166343 |
| ENSG00000271848 | ENSG00000166343 |
| ENSG00000260776 | ENSG00000166411 |
| ENSG00000261143 | ENSG00000166411 |
| ENSG00000260213 | ENSG00000166446 |
| ENSG00000246273 | ENSG00000166471 |
| ENSG00000265533 | ENSG00000166479 |
| ENSG00000246273 | ENSG00000166483 |
| ENSG00000254860 | ENSG00000166483 |
| ENSG00000228983 | ENSG00000166484 |
| ENSG00000240445 | ENSG00000166484 |
| ENSG00000262769 | ENSG00000166484 |
| ENSG00000273018 | ENSG00000166484 |
| ENSG00000259429 | ENSG00000166503 |
| ENSG00000271816 | ENSG00000166507 |
| ENSG00000271848 | ENSG00000166507 |
| ENSG00000078319 | ENSG00000166508 |
| ENSG00000242798 | ENSG00000166508 |
| ENSG00000111788 | ENSG00000166523 |

|                 |                 |
|-----------------|-----------------|
| ENSG00000214776 | ENSG00000166523 |
| ENSG00000226711 | ENSG00000166523 |
| ENSG00000244050 | ENSG00000166523 |
| ENSG00000256069 | ENSG00000166523 |
| ENSG00000256552 | ENSG00000166523 |
| ENSG00000275367 | ENSG00000166523 |
| ENSG00000111788 | ENSG00000166532 |
| ENSG00000164845 | ENSG00000166532 |
| ENSG00000214776 | ENSG00000166532 |
| ENSG00000215241 | ENSG00000166532 |
| ENSG00000256069 | ENSG00000166532 |
| ENSG00000256661 | ENSG00000166532 |
| ENSG00000261519 | ENSG00000166548 |
| ENSG00000246523 | ENSG00000166575 |
| ENSG00000257681 | ENSG00000166598 |
| ENSG00000231154 | ENSG00000166681 |
| ENSG00000227036 | ENSG00000166685 |
| ENSG00000231728 | ENSG00000166707 |
| ENSG00000259352 | ENSG00000166710 |
| ENSG00000259479 | ENSG00000166710 |
| ENSG00000259539 | ENSG00000166710 |
| ENSG00000189136 | ENSG00000166716 |
| ENSG00000225151 | ENSG00000166716 |
| ENSG00000166763 | ENSG00000166734 |
| ENSG00000205771 | ENSG00000166734 |
| ENSG00000259479 | ENSG00000166734 |
| ENSG00000256947 | ENSG00000166741 |
| ENSG00000266947 | ENSG00000166750 |
| ENSG00000166763 | ENSG00000166762 |
| ENSG00000205771 | ENSG00000166762 |
| ENSG00000249839 | ENSG00000166762 |
| ENSG00000250251 | ENSG00000166780 |
| ENSG00000183458 | ENSG00000166783 |
| ENSG00000250251 | ENSG00000166783 |
| ENSG00000260735 | ENSG00000166783 |
| ENSG00000254602 | ENSG00000166793 |
| ENSG00000245571 | ENSG00000166801 |
| ENSG00000214331 | ENSG00000166816 |
| ENSG00000247033 | ENSG00000166816 |
| ENSG00000274383 | ENSG00000166839 |
| ENSG00000277324 | ENSG00000166845 |
| ENSG00000257303 | ENSG00000166886 |
| ENSG00000257342 | ENSG00000166886 |
| ENSG00000258461 | ENSG00000166887 |
| ENSG00000259125 | ENSG00000166888 |
| ENSG00000255139 | ENSG00000166889 |
| ENSG00000245571 | ENSG00000166902 |
| ENSG00000254477 | ENSG00000166902 |

|                 |                 |
|-----------------|-----------------|
| ENSG00000259448 | ENSG00000166912 |
| ENSG00000078319 | ENSG00000166924 |
| ENSG00000224729 | ENSG00000166924 |
| ENSG00000242294 | ENSG00000166924 |
| ENSG00000272752 | ENSG00000166924 |
| ENSG00000274272 | ENSG00000166924 |
| ENSG00000242798 | ENSG00000166925 |
| ENSG00000254477 | ENSG00000166927 |
| ENSG00000205771 | ENSG00000166946 |
| ENSG00000249839 | ENSG00000166947 |
| ENSG00000258461 | ENSG00000166947 |
| ENSG00000205771 | ENSG00000166963 |
| ENSG00000249839 | ENSG00000166963 |
| ENSG00000259595 | ENSG00000166963 |
| ENSG00000205930 | ENSG00000166979 |
| ENSG00000257342 | ENSG00000166987 |
| ENSG00000259125 | ENSG00000166987 |
| ENSG00000078319 | ENSG00000166997 |
| ENSG00000242294 | ENSG00000166997 |
| ENSG00000244219 | ENSG00000166997 |
| ENSG00000272752 | ENSG00000166997 |
| ENSG00000166763 | ENSG00000167004 |
| ENSG00000205771 | ENSG00000167004 |
| ENSG00000249839 | ENSG00000167004 |
| ENSG00000204584 | ENSG00000167085 |
| ENSG00000236472 | ENSG00000167100 |
| ENSG00000229980 | ENSG00000167107 |
| ENSG00000204055 | ENSG00000167113 |
| ENSG00000228395 | ENSG00000167113 |
| ENSG00000257524 | ENSG00000167113 |
| ENSG00000204055 | ENSG00000167114 |
| ENSG00000257524 | ENSG00000167114 |
| ENSG00000204054 | ENSG00000167130 |
| ENSG00000204054 | ENSG00000167136 |
| ENSG00000246877 | ENSG00000167173 |
| ENSG00000259843 | ENSG00000167207 |
| ENSG00000260249 | ENSG00000167207 |
| ENSG00000260616 | ENSG00000167207 |
| ENSG00000260249 | ENSG00000167208 |
| ENSG00000266957 | ENSG00000167220 |
| ENSG00000260599 | ENSG00000167232 |
| ENSG00000268038 | ENSG00000167232 |
| ENSG00000268981 | ENSG00000167232 |
| ENSG00000099869 | ENSG00000167244 |
| ENSG00000254528 | ENSG00000167257 |
| ENSG00000278768 | ENSG00000167257 |
| ENSG00000260999 | ENSG00000167261 |
| ENSG00000276075 | ENSG00000167261 |

|                 |                 |
|-----------------|-----------------|
| ENSG00000260999 | ENSG00000167264 |
| ENSG00000261386 | ENSG00000167264 |
| ENSG00000276075 | ENSG00000167264 |
| ENSG00000262585 | ENSG00000167291 |
| ENSG00000260005 | ENSG00000167302 |
| ENSG00000263069 | ENSG00000167302 |
| ENSG00000264269 | ENSG00000167315 |
| ENSG00000267322 | ENSG00000167315 |
| ENSG00000255367 | ENSG00000167323 |
| ENSG00000263321 | ENSG00000167363 |
| ENSG00000183604 | ENSG00000167371 |
| ENSG00000198106 | ENSG00000167371 |
| ENSG00000205534 | ENSG00000167371 |
| ENSG00000238045 | ENSG00000167371 |
| ENSG00000260517 | ENSG00000167371 |
| ENSG00000247324 | ENSG00000167377 |
| ENSG00000176761 | ENSG00000167380 |
| ENSG00000266903 | ENSG00000167380 |
| ENSG00000267348 | ENSG00000167380 |
| ENSG00000176761 | ENSG00000167384 |
| ENSG00000186019 | ENSG00000167384 |
| ENSG00000266903 | ENSG00000167384 |
| ENSG00000183604 | ENSG00000167394 |
| ENSG00000239791 | ENSG00000167394 |
| ENSG00000261346 | ENSG00000167395 |
| ENSG00000278133 | ENSG00000167395 |
| ENSG00000265148 | ENSG00000167419 |
| ENSG00000265542 | ENSG00000167419 |
| ENSG00000267248 | ENSG00000167434 |
| ENSG00000268087 | ENSG00000167460 |
| ENSG00000268087 |                 |















|                 |                 |
|-----------------|-----------------|
| ENSG00000230189 | ENSG00000169902 |
| ENSG00000234185 | ENSG00000169902 |
| ENSG00000272693 | ENSG00000169902 |
| ENSG00000240541 | ENSG00000169908 |
| ENSG00000164669 | ENSG00000169919 |
| ENSG00000224316 | ENSG00000169919 |
| ENSG00000228409 | ENSG00000169919 |
| ENSG00000272693 | ENSG00000169919 |
| ENSG00000273142 | ENSG00000169919 |
| ENSG00000205534 | ENSG00000169951 |
| ENSG00000250616 | ENSG00000169951 |
| ENSG00000183604 | ENSG00000169955 |
| ENSG00000260083 | ENSG00000169955 |
| ENSG00000261346 | ENSG00000169955 |
| ENSG00000262721 | ENSG00000169955 |
| ENSG00000235560 | ENSG00000169957 |
| ENSG00000239791 | ENSG00000169957 |
| ENSG00000261346 | ENSG00000169957 |
| ENSG00000217801 | ENSG00000169962 |
| ENSG00000268575 | ENSG00000169962 |
| ENSG00000273443 | ENSG00000169962 |
| ENSG00000214820 | ENSG00000169964 |
| ENSG00000236869 | ENSG00000169964 |
| ENSG00000177757 | ENSG00000169972 |
| ENSG00000230699 | ENSG00000169972 |
| ENSG00000215067 | ENSG00000169992 |
| ENSG00000256806 | ENSG00000169992 |
| ENSG00000264772 | ENSG00000169992 |
| ENSG00000205485 | ENSG00000170027 |
| ENSG00000214439 | ENSG00000170027 |
| ENSG00000250990 | ENSG00000170027 |
| ENSG00000264772 | ENSG00000170037 |

ENSG00000262492 ENSG00000170049  
ENSG00000263171 ENSG00000170049  
ENSG00000223396 ENSG00000170075  
ENSG00000231871 ENSG00000170075  
ENSG00000234678 ENSG00000170075  
ENSG00000243323 ENSG00000170075  
ENSG00000248596 ENSG00000170085  
ENSG00000251458 ENSG00000170085  
ENSG00000127957 ENSG00000170092  
ENSG00000224888 ENSG00000170100  
ENSG00000259877 ENSG00000170100  
ENSG00000260630 ENSG00000170100  
ENSG00000261273 ENSG00000170100  
ENSG00000261744 ENSG00000170100  
ENSG00000267048 ENSG00000170100  
ENSG00000215067 ENSG00000170175  
ENSG00000256806 ENSG00000170175  
ENSG00000236296 ENSG00000170185  
ENSG00000250326 ENSG00000170185  
ENSG00000251600 ENSG00000170185  
ENSG00000213742 ENSG00000170191  
ENSG00000274414 ENSG00000170191  
ENSG00000247699 ENSG00000170231  
ENSG00000247699 ENSG00000170234  
ENSG00000133624 ENSG00000170260  
ENSG00000244560 ENSG00000170260  
ENSG00000205930 ENSG00000170262  
ENSG00000133624 ENSG00000170265  
ENSG00000272149 ENSG00000170275  
ENSG00000215067 ENSG00000170291  
ENSG00000264772 ENSG00000170291  
ENSG00000215067 ENSG00000170296  
ENSG00000256806 ENSG00000170296  
ENSG00000235978 ENSG00000170364  
ENSG00000177640 ENSG00000170370  
ENSG00000225302 ENSG00000170370  
ENSG00000229847 ENSG00000170370  
ENSG00000258114 ENSG00000170370  
ENSG00000229153 ENSG00000170379  
ENSG00000244198 ENSG00000170379  
ENSG00000244479 ENSG00000170379  
ENSG00000253882 ENSG00000170379  
ENSG00000227782 ENSG00000170425  
ENSG00000257809 ENSG00000170439  
ENSG00000258907 ENSG00000170439  
ENSG00000272154 ENSG00000170445  
ENSG00000278936 ENSG00000170445  
ENSG00000280029 ENSG00000170445



ENSG00000226472 ENSG00000170456  
ENSG00000235884 ENSG00000170456  
ENSG00000255867 ENSG00000170456  
ENSG00000278936 ENSG00000170458  
ENSG00000280029 ENSG00000170458  
ENSG00000224635 ENSG00000170471  
ENSG00000182796 ENSG00000170473  
ENSG00000249593 ENSG00000170482  
ENSG00000230140 ENSG00000170485  
ENSG00000247950 ENSG00000170522  
ENSG00000215244 ENSG00000170525  
ENSG00000261465 ENSG00000170540  
ENSG00000224846 ENSG00000170542  
ENSG00000228170 ENSG00000170542  
ENSG00000230438 ENSG00000170542  
ENSG00000227279 ENSG00000170558  
ENSG00000263878 ENSG00000170579  
ENSG00000182796 ENSG00000170581  
ENSG00000214855 ENSG00000170604  
ENSG00000268621 ENSG00000170604  
ENSG00000273137 ENSG00000170638  
ENSG00000273188 ENSG00000170638  
ENSG00000273253 ENSG00000170638  
ENSG00000248027 ENSG00000170647  
ENSG00000248265 ENSG00000170653  
ENSG00000257337 ENSG00000170653  
ENSG00000237461 ENSG00000170681  
ENSG00000203362 ENSG00000170734  
ENSG00000237686 ENSG00000170734  
ENSG00000245261 ENSG00000170734  
ENSG00000229656 ENSG00000170759  
ENSG00000176700 ENSG00000170776  
ENSG00000189136 ENSG00000170776  
ENSG00000259367 ENSG00000170776  
ENSG00000249767 ENSG00000170801  
ENSG00000267095 ENSG00000170832  
ENSG00000241163 ENSG00000170837  
ENSG00000248008 ENSG00000170855  
ENSG00000241015 ENSG00000170892  
ENSG00000267265 ENSG00000170892  
ENSG00000267577 ENSG00000170892  
ENSG00000216775 ENSG00000170899  
ENSG00000231683 ENSG00000170899  
ENSG00000237017 ENSG00000170909  
ENSG00000267265 ENSG00000170909  
ENSG00000233635 ENSG00000170921  
ENSG00000263644 ENSG00000170921  
ENSG00000123870 ENSG00000170954

ENSG00000269535 ENSG00000170954  
ENSG00000267984 ENSG00000171049  
ENSG00000269102 ENSG00000171049  
ENSG00000269388 ENSG00000171049  
ENSG00000269959 ENSG00000171049  
ENSG00000269102 ENSG00000171051  
ENSG00000269535 ENSG00000171051  
ENSG00000269825 ENSG00000171051  
ENSG00000268758 ENSG00000171105  
ENSG00000269802 ENSG00000171105  
ENSG00000270178 ENSG00000171121  
ENSG00000239332 ENSG00000171150  
ENSG00000228395 ENSG00000171159  
ENSG00000251562 ENSG00000171219  
ENSG00000088340 ENSG00000171222  
ENSG00000232907 ENSG00000171222  
ENSG00000219665 ENSG00000171223  
ENSG00000229867 ENSG00000171227  
ENSG00000231013 ENSG00000171227  
ENSG00000236914 ENSG00000171262  
ENSG00000259345 ENSG00000171262  
ENSG00000219665 ENSG00000171291  
ENSG00000267274 ENSG00000171291  
ENSG00000267424 ENSG00000171291  
ENSG00000219665 ENSG00000171295  
ENSG00000257681 ENSG00000171310  
ENSG00000257732 ENSG00000171310  
ENSG00000231970 ENSG00000171314  
ENSG00000232022 ENSG00000171357  
ENSG00000215866 ENSG00000171385  
ENSG00000231346 ENSG00000171385  
ENSG00000231028 ENSG00000171408  
ENSG00000234084 ENSG00000171408  
ENSG00000237596 ENSG00000171408  
ENSG00000267549 ENSG00000171443  
ENSG00000267649 ENSG00000171443  
ENSG00000232633 ENSG00000171444  
ENSG00000265533 ENSG00000171451  
ENSG00000198547 ENSG00000171456  
ENSG00000237686 ENSG00000171462  
ENSG00000266978 ENSG00000171466  
ENSG00000267650 ENSG00000171466  
ENSG00000267106 ENSG00000171469  
ENSG00000267612 ENSG00000171469  
ENSG00000245067 ENSG00000171476  
ENSG00000225492 ENSG00000171488  
ENSG00000237505 ENSG00000171488  
ENSG00000263307 ENSG00000171490

ENSG00000223653 ENSG00000171517  
ENSG00000282057 ENSG00000171517  
ENSG00000232098 ENSG00000171574  
ENSG00000267858 ENSG00000171574  
ENSG00000269473 ENSG00000171574  
ENSG00000228526 ENSG00000171603  
ENSG00000234546 ENSG00000171603  
ENSG00000176593 ENSG00000171606  
ENSG00000267871 ENSG00000171606  
ENSG00000228526 ENSG00000171608  
ENSG00000234546 ENSG00000171608  
ENSG00000272078 ENSG00000171608  
ENSG00000224861 ENSG00000171723  
ENSG00000269889 ENSG00000171757  
ENSG00000179523 ENSG00000171766  
ENSG00000267090 ENSG00000171777  
ENSG00000267640 ENSG00000171777  
ENSG00000235358 ENSG00000171790  
ENSG00000238287 ENSG00000171790  
ENSG00000281207 ENSG00000171790  
ENSG00000235358 ENSG00000171793  
ENSG00000281207 ENSG00000171793  
ENSG00000177406 ENSG00000171823  
ENSG00000235049 ENSG00000171823  
ENSG00000177406 ENSG00000171840  
ENSG00000164845 ENSG00000171847  
ENSG00000176654 ENSG00000171847  
ENSG00000215241 ENSG00000171847  
ENSG00000256552 ENSG00000171847  
ENSG00000256661 ENSG00000171847  
ENSG00000205885 ENSG00000171860  
ENSG00000226711 ENSG00000171860  
ENSG00000244050 ENSG00000171860  
ENSG00000262905 ENSG00000171861  
ENSG00000196566 ENSG00000171862  
ENSG00000223482 ENSG00000171862  
ENSG00000225913 ENSG00000171862  
ENSG00000205181 ENSG00000171867  
ENSG00000266908 ENSG00000171867  
ENSG00000205771 ENSG00000171877  
ENSG00000259479 ENSG00000171877  
ENSG00000259539 ENSG00000171877  
ENSG00000264885 ENSG00000171928  
ENSG00000197670 ENSG00000171940  
ENSG00000231703 ENSG00000171940  
ENSG00000271774 ENSG00000171940  
ENSG00000203855 ENSG00000171943  
ENSG00000227082 ENSG00000171943

ENSG00000196951 ENSG00000172007  
ENSG00000273247 ENSG00000172007  
ENSG00000267551 ENSG00000172009  
ENSG00000179978 ENSG00000172062  
ENSG00000226259 ENSG00000172062  
ENSG00000225420 ENSG00000172071  
ENSG00000230006 ENSG00000172071  
ENSG00000267122 ENSG00000172081  
ENSG00000222041 ENSG00000172086  
ENSG00000280721 ENSG00000172086  
ENSG00000244380 ENSG00000172113  
ENSG00000267102 ENSG00000172123  
ENSG00000267648 ENSG00000172123  
ENSG00000267745 ENSG00000172123  
ENSG00000214353 ENSG00000172137  
ENSG00000263311 ENSG00000172137  
ENSG00000227803 ENSG00000172197  
ENSG00000227803 ENSG00000172201  
ENSG00000232358 ENSG00000172216  
ENSG00000214776 ENSG00000172243  
ENSG00000214826 ENSG00000172243  
ENSG00000237248 ENSG00000172243  
ENSG00000255734 ENSG00000172243  
ENSG00000256069 ENSG00000172243  
ENSG00000256667 ENSG00000172243  
ENSG00000255422 ENSG00000172273  
ENSG00000224081 ENSG00000172339  
ENSG00000226026 ENSG00000172339  
ENSG00000228852 ENSG00000172339  
ENSG00000235501 ENSG00000172339  
ENSG00000241316 ENSG00000172340  
ENSG00000242294 ENSG00000172354  
ENSG00000242798 ENSG00000172354  
ENSG00000272752 ENSG00000172354  
ENSG00000236829 ENSG00000172366  
ENSG00000260022 ENSG00000172366  
ENSG00000255422 ENSG00000172375  
ENSG00000154608 ENSG00000172399  
ENSG00000245958 ENSG00000172399  
ENSG00000250412 ENSG00000172399  
ENSG00000260404 ENSG00000172399  
ENSG00000154608 ENSG00000172403  
ENSG00000245958 ENSG00000172403  
ENSG00000248213 ENSG00000172403  
ENSG00000250412 ENSG00000172403  
ENSG00000260404 ENSG00000172403  
ENSG00000231113 ENSG00000172432  
ENSG00000237686 ENSG00000172432

ENSG00000239407 ENSG00000172465  
ENSG00000257267 ENSG00000172466  
ENSG00000268873 ENSG00000172466  
ENSG00000261366 ENSG00000172469  
ENSG00000231154 ENSG00000172476  
ENSG00000239407 ENSG00000172476  
ENSG00000270050 ENSG00000172476  
ENSG00000271147 ENSG00000172476  
ENSG00000255478 ENSG00000172500  
ENSG00000160172 ENSG00000172508  
ENSG00000254510 ENSG00000172508  
ENSG00000255949 ENSG00000172508  
ENSG00000160172 ENSG00000172531  
ENSG00000232725 ENSG00000172534  
ENSG00000254510 ENSG00000172543  
ENSG00000233441 ENSG00000172578  
ENSG00000258458 ENSG00000172590  
ENSG00000229719 ENSG00000172638  
ENSG00000224812 ENSG00000172661  
ENSG00000237840 ENSG00000172661  
ENSG00000243349 ENSG00000172661  
ENSG00000224812 ENSG00000172671  
ENSG00000237840 ENSG00000172671  
ENSG00000243349 ENSG00000172671  
ENSG00000267547 ENSG00000172716  
ENSG00000267648 ENSG00000172716  
ENSG00000267745 ENSG00000172716  
ENSG00000255306 ENSG00000172725  
ENSG00000224666 ENSG00000172738  
ENSG00000223508 ENSG00000172748  
ENSG00000249868 ENSG00000172748  
ENSG00000254510 ENSG00000172757  
ENSG00000255517 ENSG00000172757  
ENSG00000168852 ENSG00000172766  
ENSG00000215483 ENSG00000172766  
ENSG00000237263 ENSG00000172766  
ENSG00000244300 ENSG00000172780  
ENSG00000253540 ENSG00000172780  
ENSG00000257337 ENSG00000172819  
ENSG00000160172 ENSG00000172830  
ENSG00000255031 ENSG00000172830  
ENSG00000255236 ENSG00000172830  
ENSG00000270049 ENSG00000172831  
ENSG00000246898 ENSG00000172840  
ENSG00000277978 ENSG00000172840  
ENSG00000248445 ENSG00000172901  
ENSG00000160172 ENSG00000172932  
ENSG00000235257 ENSG00000172936

ENSG00000198590 ENSG00000172939  
ENSG00000235257 ENSG00000172939  
ENSG00000254756 ENSG00000172977  
ENSG00000214184 ENSG00000172985  
ENSG00000240135 ENSG00000172986  
ENSG00000241163 ENSG00000172986  
ENSG00000267121 ENSG00000172992  
ENSG00000160172 ENSG00000173020  
ENSG00000255306 ENSG00000173020  
ENSG00000255468 ENSG00000173020  
ENSG00000164669 ENSG00000173041  
ENSG00000234585 ENSG00000173041  
ENSG00000228863 ENSG00000173110  
ENSG00000160172 ENSG00000173120  
ENSG00000254510 ENSG00000173120  
ENSG00000255468 ENSG00000173120  
ENSG00000160766 ENSG00000173171  
ENSG00000272758 ENSG00000173193  
ENSG00000253406 ENSG00000173210  
ENSG00000231889 ENSG00000173214  
ENSG00000271789 ENSG00000173214  
ENSG00000176654 ENSG00000173262  
ENSG00000256552 ENSG00000173262  
ENSG00000256661 ENSG00000173262  
ENSG00000229719 ENSG00000173264  
ENSG00000256789 ENSG00000173264  
ENSG00000196566 ENSG00000173267  
ENSG00000225913 ENSG00000173267  
ENSG00000272734 ENSG00000173267  
ENSG00000196566 ENSG00000173269  
ENSG00000223482 ENSG00000173269  
ENSG00000225913 ENSG00000173269  
ENSG00000272631 ENSG00000173269  
ENSG00000272734 ENSG00000173269  
ENSG00000253426 ENSG00000173281  
ENSG00000111788 ENSG00000173391  
ENSG00000214776 ENSG00000173391  
ENSG00000214826 ENSG00000173391  
ENSG00000256069 ENSG00000173391  
ENSG00000235016 ENSG00000173402  
ENSG00000223343 ENSG00000173421  
ENSG00000270441 ENSG00000173421  
ENSG00000230424 ENSG00000173436  
ENSG00000245385 ENSG00000173456  
ENSG00000255422 ENSG00000173456  
ENSG00000254756 ENSG00000173465  
ENSG00000255478 ENSG00000173465  
ENSG00000213753 ENSG00000173480

ENSG00000270804 ENSG00000173480  
ENSG00000254614 ENSG00000173486  
ENSG00000260776 ENSG00000173517  
ENSG00000261143 ENSG00000173517  
ENSG00000269951 ENSG00000173517  
ENSG00000253125 ENSG00000173530  
ENSG00000235016 ENSG00000173531  
ENSG00000245025 ENSG00000173535  
ENSG00000253125 ENSG00000173535  
ENSG00000215196 ENSG00000173545  
ENSG00000260269 ENSG00000173546  
ENSG00000246877 ENSG00000173548  
ENSG00000260269 ENSG00000173548  
ENSG00000240225 ENSG00000173581  
ENSG00000267265 ENSG00000173581  
ENSG00000246985 ENSG00000173598  
ENSG00000257283 ENSG00000173598  
ENSG00000228526 ENSG00000173614  
ENSG00000234546 ENSG00000173614  
ENSG00000272078 ENSG00000173614  
ENSG00000245156 ENSG00000173621  
ENSG00000234880 ENSG00000173638  
ENSG00000179743 ENSG00000173641  
ENSG00000215908 ENSG00000173641  
ENSG00000268869 ENSG00000173641  
ENSG00000241278 ENSG00000173706  
ENSG00000241288 ENSG00000173706  
ENSG00000229980 ENSG00000173714  
ENSG00000255517 ENSG00000173715  
ENSG00000236383 ENSG00000173757  
ENSG00000267002 ENSG00000173757  
ENSG00000267765 ENSG00000173786  
ENSG00000263069 ENSG00000173818  
ENSG00000263069 ENSG00000173821  
ENSG00000245532 ENSG00000173825  
ENSG00000267062 ENSG00000173875  
ENSG00000240373 ENSG00000173889  
ENSG00000269889 ENSG00000173889  
ENSG00000245156 ENSG00000173898  
ENSG00000230561 ENSG00000173926  
ENSG00000245937 ENSG00000173926  
ENSG00000250602 ENSG00000173926  
ENSG00000185485 ENSG00000174004  
ENSG00000170919 ENSG00000174032  
ENSG00000235903 ENSG00000174032  
ENSG00000254510 ENSG00000174080  
ENSG00000197301 ENSG00000174099  
ENSG00000241749 ENSG00000174099

ENSG00000243024 ENSG00000174099  
ENSG00000250748 ENSG00000174099  
ENSG00000241749 ENSG00000174106  
ENSG00000243024 ENSG00000174106  
ENSG00000250748 ENSG00000174106  
ENSG00000231160 ENSG00000174125  
ENSG00000249348 ENSG00000174130  
ENSG00000224699 ENSG00000174151  
ENSG00000241720 ENSG00000174151  
ENSG00000231683 ENSG00000174156  
ENSG00000196810 ENSG00000174227  
ENSG00000262791 ENSG00000174231  
ENSG00000257735 ENSG00000174233  
ENSG00000258101 ENSG00000174233  
ENSG00000245311 ENSG00000174236  
ENSG00000247903 ENSG00000174236  
ENSG00000262791 ENSG00000174238  
ENSG00000257735 ENSG00000174243  
ENSG00000257913 ENSG00000174243  
ENSG00000256116 ENSG00000174276  
ENSG00000215067 ENSG00000174282  
ENSG00000264772 ENSG00000174282  
ENSG00000215067 ENSG00000174292  
ENSG00000256806 ENSG00000174292  
ENSG00000234678 ENSG00000174307  
ENSG00000243323 ENSG00000174307  
ENSG00000215067 ENSG00000174327  
ENSG00000256806 ENSG00000174327  
ENSG00000232993 ENSG00000174348  
ENSG00000236242 ENSG00000174405  
ENSG00000232729 ENSG00000174428  
ENSG00000277053 ENSG00000174428  
ENSG00000255650 ENSG00000174437  
ENSG00000258210 ENSG00000174437  
ENSG00000260773 ENSG00000174444  
ENSG00000256139 ENSG00000174456  
ENSG00000258210 ENSG00000174456  
ENSG00000254510 ENSG00000174483  
ENSG00000255517 ENSG00000174483  
ENSG00000259924 ENSG00000174485  
ENSG00000260773 ENSG00000174485  
ENSG00000239482 ENSG00000174500  
ENSG00000254510 ENSG00000174516  
ENSG00000213753 ENSG00000174586  
ENSG00000268049 ENSG00000174586  
ENSG00000268230 ENSG00000174586  
ENSG00000268895 ENSG00000174586  
ENSG00000242337 ENSG00000174640



ENSG00000254756 ENSG00000174684  
ENSG00000255468 ENSG00000174684  
ENSG00000245156 ENSG00000174744  
ENSG00000254510 ENSG00000174744  
ENSG00000254756 ENSG00000174744  
ENSG00000245067 ENSG00000174780  
ENSG00000173727 ENSG00000174791  
ENSG00000254756 ENSG00000174791  
ENSG00000255478 ENSG00000174791  
ENSG00000246523 ENSG00000174804  
ENSG00000173727 ENSG00000174807  
ENSG00000254510 ENSG00000174807  
ENSG00000255478 ENSG00000174807  
ENSG00000244383 ENSG00000174839  
ENSG00000245156 ENSG00000174851  
ENSG00000245532 ENSG00000174851  
ENSG00000254510 ENSG00000174851  
ENSG00000255038 ENSG00000174851  
ENSG00000173727 ENSG00000174871  
ENSG00000245532 ENSG00000174871  
ENSG00000255478 ENSG00000174871  
ENSG00000245156 ENSG00000174903  
ENSG00000254461 ENSG00000174903  
ENSG00000266983 ENSG00000174917  
ENSG00000103472 ENSG00000174938  
ENSG00000198106 ENSG00000174938  
ENSG00000235560 ENSG00000174938  
ENSG00000260367 ENSG00000174938  
ENSG00000260908 ENSG00000174938  
ENSG00000261067 ENSG00000174938  
ENSG00000103472 ENSG00000174939  
ENSG00000183604 ENSG00000174939  
ENSG00000198106 ENSG00000174939  
ENSG00000205534 ENSG00000174939  
ENSG00000260083 ENSG00000174939  
ENSG00000260517 ENSG00000174939  
ENSG00000260908 ENSG00000174939  
ENSG00000261346 ENSG00000174939  
ENSG00000262721 ENSG00000174939  
ENSG00000235191 ENSG00000174951  
ENSG00000245156 ENSG00000174996  
ENSG00000273599 ENSG00000175029  
ENSG00000241570 ENSG00000175040  
ENSG00000244171 ENSG00000175054  
ENSG00000241570 ENSG00000175066  
ENSG00000249417 ENSG00000175066  
ENSG00000248932 ENSG00000175110  
ENSG00000251562 ENSG00000175115

ENSG00000254461 ENSG00000175115  
ENSG00000260233 ENSG00000175115  
ENSG00000225313 ENSG00000175130  
ENSG00000235790 ENSG00000175130  
ENSG00000236065 ENSG00000175130  
ENSG00000223358 ENSG00000175182  
ENSG00000224713 ENSG00000175197  
ENSG00000257342 ENSG00000175203  
ENSG00000276727 ENSG00000175203  
ENSG00000242349 ENSG00000175206  
ENSG00000247675 ENSG00000175213  
ENSG00000224713 ENSG00000175215  
ENSG00000257342 ENSG00000175215  
ENSG00000247675 ENSG00000175220  
ENSG00000255197 ENSG00000175224  
ENSG00000254427 ENSG00000175264  
ENSG00000254409 ENSG00000175274  
ENSG00000204055 ENSG00000175283  
ENSG00000234771 ENSG00000175283  
ENSG00000254035 ENSG00000175309  
ENSG00000245156 ENSG00000175376  
ENSG00000245532 ENSG00000175376  
ENSG00000255478 ENSG00000175376  
ENSG00000272983 ENSG00000175395  
ENSG00000276805 ENSG00000175395  
ENSG00000248469 ENSG00000175414  
ENSG00000248596 ENSG00000175414  
ENSG00000250909 ENSG00000175414  
ENSG00000251458 ENSG00000175414  
ENSG00000251314 ENSG00000175426  
ENSG00000253557 ENSG00000175445  
ENSG00000160172 ENSG00000175463  
ENSG00000255404 ENSG00000175467  
ENSG00000234311 ENSG00000175470  
ENSG00000255306 ENSG00000175482  
ENSG00000255517 ENSG00000175482  
ENSG00000268030 ENSG00000175489  
ENSG00000268199 ENSG00000175489  
ENSG00000241170 ENSG00000175536  
ENSG00000254928 ENSG00000175538  
ENSG00000245156 ENSG00000175550  
ENSG00000245148 ENSG00000175591  
ENSG00000260401 ENSG00000175591  
ENSG00000245156 ENSG00000175592  
ENSG00000255038 ENSG00000175592  
ENSG00000245156 ENSG00000175602  
ENSG00000255517 ENSG00000175634  
ENSG00000255949 ENSG00000175634

ENSG00000264666 ENSG00000175662  
ENSG00000217801 ENSG00000175756  
ENSG00000223764 ENSG00000175756  
ENSG00000272512 ENSG00000175756  
ENSG00000230262 ENSG00000175787  
ENSG00000269946 ENSG00000175787  
ENSG00000213373 ENSG00000175832  
ENSG00000236383 ENSG00000175832  
ENSG00000260793 ENSG00000175832  
ENSG00000267765 ENSG00000175832  
ENSG00000111788 ENSG00000175899  
ENSG00000214776 ENSG00000175899  
ENSG00000245105 ENSG00000175899  
ENSG00000256069 ENSG00000175899  
ENSG00000256673 ENSG00000175899  
ENSG00000183604 ENSG00000175938  
ENSG00000250616 ENSG00000175938  
ENSG00000260852 ENSG00000175938  
ENSG00000255857 ENSG00000175970  
ENSG00000281357 ENSG00000176018  
ENSG00000260179 ENSG00000176022  
ENSG00000182310 ENSG00000176024  
ENSG00000269535 ENSG00000176024  
ENSG00000269834 ENSG00000176024  
ENSG00000275055 ENSG00000176024  
ENSG00000103472 ENSG00000176046  
ENSG00000198106 ENSG00000176046  
ENSG00000260367 ENSG00000176046  
ENSG00000260517 ENSG00000176046  
ENSG00000260908 ENSG00000176046  
ENSG00000261067 ENSG00000176046  
ENSG00000261329 ENSG00000176046  
ENSG00000280780 ENSG00000176049  
ENSG00000275549 ENSG00000176058  
ENSG00000249637 ENSG00000176087  
ENSG00000272154 ENSG00000176087  
ENSG00000278936 ENSG00000176087  
ENSG00000280029 ENSG00000176087  
ENSG00000270441 ENSG00000176095  
ENSG00000263218 ENSG00000176108  
ENSG00000078319 ENSG00000176125  
ENSG00000242294 ENSG00000176125  
ENSG00000272752 ENSG00000176125  
ENSG00000242622 ENSG00000176142  
ENSG00000280798 ENSG00000176148  
ENSG00000266998 ENSG00000176170  
ENSG00000267546 ENSG00000176170  
ENSG00000266903 ENSG00000176222

ENSG00000176236 ENSG00000176244  
ENSG00000273066 ENSG00000176248  
ENSG00000225313 ENSG00000176261  
ENSG00000236065 ENSG00000176261  
ENSG00000232098 ENSG00000176293  
ENSG00000269054 ENSG00000176293  
ENSG00000276449 ENSG00000176293  
ENSG00000261519 ENSG00000176387  
ENSG00000270049 ENSG00000176387  
ENSG00000214719 ENSG00000176390  
ENSG00000248121 ENSG00000176390  
ENSG00000250462 ENSG00000176390  
ENSG00000264538 ENSG00000176390  
ENSG00000214544 ENSG00000176410  
ENSG00000214544 ENSG00000176428  
ENSG00000232415 ENSG00000176428  
ENSG00000227051 ENSG00000176438  
ENSG00000267436 ENSG00000176490  
ENSG00000241889 ENSG00000176542  
ENSG00000226377 ENSG00000176658  
ENSG00000279762 ENSG00000176658  
ENSG00000204650 ENSG00000176681  
ENSG00000245573 ENSG00000176697  
ENSG00000254934 ENSG00000176697  
ENSG00000261273 ENSG00000176715  
ENSG00000261546 ENSG00000176715  
ENSG00000220804 ENSG00000176720  
ENSG00000233806 ENSG00000176720  
ENSG00000215196 ENSG00000176788  
ENSG00000215769 ENSG00000176809  
ENSG00000261888 ENSG00000176845  
ENSG00000279066 ENSG00000176845  
ENSG00000237586 ENSG00000176853  
ENSG00000253607 ENSG00000176853  
ENSG00000258285 ENSG00000176871  
ENSG00000258603 ENSG00000176903  
ENSG00000258891 ENSG00000176903  
ENSG00000180539 ENSG00000176919  
ENSG00000273066 ENSG00000176919  
ENSG00000250889 ENSG00000176928  
ENSG00000233392 ENSG00000176946  
ENSG00000233806 ENSG00000176946  
ENSG00000235351 ENSG00000176946  
ENSG00000198106 ENSG00000176953  
ENSG00000260517 ENSG00000176953  
ENSG00000260853 ENSG00000176953  
ENSG00000245573 ENSG00000176971  
ENSG00000254934 ENSG00000176971

ENSG00000154874 ENSG00000176974  
ENSG00000271816 ENSG00000176986  
ENSG00000271848 ENSG00000176986  
ENSG00000272140 ENSG00000176986  
ENSG00000242349 ENSG00000177000  
ENSG00000267348 ENSG00000177045  
ENSG00000259605 ENSG00000177051  
ENSG00000267348 ENSG00000177051  
ENSG00000267395 ENSG00000177051  
ENSG00000260912 ENSG00000177076  
ENSG00000176700 ENSG00000177082  
ENSG00000189136 ENSG00000177082  
ENSG00000172250 ENSG00000177096  
ENSG00000227370 ENSG00000177096  
ENSG00000237037 ENSG00000177096  
ENSG00000254815 ENSG00000177106  
ENSG00000255108 ENSG00000177106  
ENSG00000269915 ENSG00000177106  
ENSG00000267107 ENSG00000177191  
ENSG00000270164 ENSG00000177191  
ENSG00000255992 ENSG00000177192  
ENSG00000233930 ENSG00000177225  
ENSG00000255158 ENSG00000177225  
ENSG00000255284 ENSG00000177225  
ENSG00000269915 ENSG00000177225  
ENSG00000231864 ENSG00000177239  
ENSG00000271335 ENSG00000177283  
ENSG00000244124 ENSG00000177311  
ENSG00000249417 ENSG00000177311  
ENSG00000228350 ENSG00000177352  
ENSG00000235016 ENSG00000177352  
ENSG00000270441 ENSG00000177352  
ENSG00000226472 ENSG00000177359  
ENSG00000277597 ENSG00000177374  
ENSG00000232871 ENSG00000177380  
ENSG00000268530 ENSG00000177380  
ENSG00000273189 ENSG00000177380  
ENSG00000223358 ENSG00000177383  
ENSG00000257894 ENSG00000177425  
ENSG00000258048 ENSG00000177425  
ENSG00000262001 ENSG00000177426  
ENSG00000263878 ENSG00000177426  
ENSG00000266401 ENSG00000177426  
ENSG00000266405 ENSG00000177426  
ENSG00000154874 ENSG00000177427  
ENSG00000264666 ENSG00000177427  
ENSG00000251095 ENSG00000177432  
ENSG00000177738 ENSG00000177453

ENSG00000215068 ENSG00000177453  
ENSG00000248092 ENSG00000177453  
ENSG00000103472 ENSG00000177455  
ENSG00000198106 ENSG00000177455  
ENSG00000238045 ENSG00000177455  
ENSG00000260517 ENSG00000177455  
ENSG00000260908 ENSG00000177455  
ENSG00000188825 ENSG00000177469  
ENSG00000267221 ENSG00000177469  
ENSG00000267765 ENSG00000177469  
ENSG00000270441 ENSG00000177479  
ENSG00000259711 ENSG00000177508  
ENSG00000198106 ENSG00000177548  
ENSG00000238045 ENSG00000177548  
ENSG00000260517 ENSG00000177548  
ENSG00000231574 ENSG00000177565  
ENSG00000164845 ENSG00000177575  
ENSG00000215241 ENSG00000177575  
ENSG00000226711 ENSG00000177575  
ENSG00000244050 ENSG00000177575  
ENSG00000256552 ENSG00000177575  
ENSG00000256967 ENSG00000177575  
ENSG00000265496 ENSG00000177576  
ENSG00000255108 ENSG00000177595  
ENSG00000255284 ENSG00000177595  
ENSG00000268945 ENSG00000177599  
ENSG00000228651 ENSG00000177613  
ENSG00000160766 ENSG00000177628  
ENSG00000231064 ENSG00000177628  
ENSG00000236675 ENSG00000177628  
ENSG00000231305 ENSG00000177646  
ENSG00000237438 ENSG00000177663  
ENSG00000255108 ENSG00000177666  
ENSG00000255284 ENSG00000177666  
ENSG00000146722 ENSG00000177679  
ENSG00000205485 ENSG00000177679  
ENSG00000205583 ENSG00000177679  
ENSG00000278416 ENSG00000177679  
ENSG00000255108 ENSG00000177697  
ENSG00000255108 ENSG00000177700  
ENSG00000255158 ENSG00000177700  
ENSG00000255284 ENSG00000177700  
ENSG00000240859 ENSG00000177706  
ENSG00000273151 ENSG00000177706  
ENSG00000177738 ENSG00000177721  
ENSG00000248092 ENSG00000177721  
ENSG00000249855 ENSG00000177721  
ENSG00000154874 ENSG00000177731

ENSG00000230662 ENSG00000177731  
ENSG00000266677 ENSG00000177731  
ENSG00000250397 ENSG00000177830  
ENSG00000269915 ENSG00000177830  
ENSG00000226688 ENSG00000177853  
ENSG00000223797 ENSG00000177873  
ENSG00000257346 ENSG00000177875  
ENSG00000257735 ENSG00000177875  
ENSG00000254035 ENSG00000177932  
ENSG00000231864 ENSG00000177943  
ENSG00000237886 ENSG00000177943  
ENSG00000251661 ENSG00000177951  
ENSG00000230724 ENSG00000177963  
ENSG00000254559 ENSG00000177963  
ENSG00000269915 ENSG00000177963  
ENSG00000184319 ENSG00000177989  
ENSG00000215481 ENSG00000178026  
ENSG00000272578 ENSG00000178026  
ENSG00000273000 ENSG00000178026  
ENSG00000230615 ENSG00000178028  
ENSG00000240050 ENSG00000178033  
ENSG00000223343 ENSG00000178057  
ENSG00000270441 ENSG00000178057  
ENSG00000230408 ENSG00000178074  
ENSG00000267436 ENSG00000178078  
ENSG00000231205 ENSG00000178093  
ENSG00000267419 ENSG00000178093  
ENSG00000267565 ENSG00000178093  
ENSG00000275540 ENSG00000178093  
ENSG00000233030 ENSG00000178096  
ENSG00000223804 ENSG00000178104  
ENSG00000272150 ENSG00000178104  
ENSG00000247317 ENSG00000178209  
ENSG00000232748 ENSG00000178226  
ENSG00000243433 ENSG00000178234  
ENSG00000223343 ENSG00000178252  
ENSG00000224424 ENSG00000178252  
ENSG00000270441 ENSG00000178252  
ENSG00000223725 ENSG00000178385  
ENSG00000257735 ENSG00000178401  
ENSG00000257342 ENSG00000178498  
ENSG00000259125 ENSG00000178498  
ENSG00000235257 ENSG00000178567  
ENSG00000260876 ENSG00000178573  
ENSG00000261390 ENSG00000178573  
ENSG00000215769 ENSG00000178607  
ENSG00000233635 ENSG00000178607  
ENSG00000260942 ENSG00000178623

ENSG00000235192 ENSG00000178662  
ENSG00000176826 ENSG00000178665  
ENSG00000224057 ENSG00000178665  
ENSG00000255085 ENSG00000178685  
ENSG00000226377 ENSG00000178691  
ENSG00000265574 ENSG00000178691  
ENSG00000266865 ENSG00000178691  
ENSG00000228002 ENSG00000178695  
ENSG00000247317 ENSG00000178719  
ENSG00000253931 ENSG00000178719  
ENSG00000260269 ENSG00000178741  
ENSG00000260919 ENSG00000178741  
ENSG00000260269 ENSG00000178761  
ENSG00000260892 ENSG00000178761  
ENSG00000182376 ENSG00000178773  
ENSG00000223959 ENSG00000178773  
ENSG00000254338 ENSG00000178814  
ENSG00000254973 ENSG00000178814  
ENSG00000272115 ENSG00000178814  
ENSG00000247498 ENSG00000178878  
ENSG00000254973 ENSG00000178896  
ENSG00000272154 ENSG00000178913  
ENSG00000280029 ENSG00000178913  
ENSG00000236869 ENSG00000178917  
ENSG00000178977 ENSG00000178921  
ENSG00000229348 ENSG00000178922  
ENSG00000234694 ENSG00000178922  
ENSG00000263271 ENSG00000178927  
ENSG00000225769 ENSG00000178947  
ENSG00000249592 ENSG00000178950  
ENSG00000251417 ENSG00000178952  
ENSG00000260517 ENSG00000178952  
ENSG00000268583 ENSG00000178980  
ENSG00000270049 ENSG00000179044  
ENSG00000254966 ENSG00000179057  
ENSG00000232600 ENSG00000179091  
ENSG00000254859 ENSG00000179091  
ENSG00000255085 ENSG00000179091  
ENSG00000240616 ENSG00000179115  
ENSG00000277749 ENSG00000179151  
ENSG00000236869 ENSG00000179152  
ENSG00000267090 ENSG00000179168  
ENSG00000267892 ENSG00000179168  
ENSG00000270028 ENSG00000179195  
ENSG00000219665 ENSG00000179262  
ENSG00000234773 ENSG00000179262  
ENSG00000180610 ENSG00000179299  
ENSG00000205794 ENSG00000179299



ENSG00000253125 ENSG00000179388  
ENSG00000253837 ENSG00000179388  
ENSG00000177757 ENSG00000179403  
ENSG00000230092 ENSG00000179403  
ENSG00000237491 ENSG00000179403  
ENSG00000241525 ENSG00000179409  
ENSG00000262228 ENSG00000179409  
ENSG00000203499 ENSG00000179526  
ENSG00000253931 ENSG00000179526  
ENSG00000242588 ENSG00000179562  
ENSG00000280828 ENSG00000179562  
ENSG00000235016 ENSG00000179564  
ENSG00000260750 ENSG00000179588  
ENSG00000261273 ENSG00000179588  
ENSG00000262492 ENSG00000179593  
ENSG00000227036 ENSG00000179604  
ENSG00000227258 ENSG00000179630  
ENSG00000254859 ENSG00000179632  
ENSG00000255050 ENSG00000179632  
ENSG00000225670 ENSG00000179639  
ENSG00000204791 ENSG00000179698  
ENSG00000257261 ENSG00000179715  
ENSG00000244627 ENSG00000179750  
ENSG00000264031 ENSG00000179761  
ENSG00000232220 ENSG00000179820  
ENSG00000242779 ENSG00000179820  
ENSG00000254548 ENSG00000179832  
ENSG00000254973 ENSG00000179832  
ENSG00000258824 ENSG00000179841  
ENSG00000266903 ENSG00000179846  
ENSG00000269807 ENSG00000179855  
ENSG00000235358 ENSG00000179862  
ENSG00000247317 ENSG00000179886  
ENSG00000254338 ENSG00000179886  
ENSG00000255050 ENSG00000179886  
ENSG00000176593 ENSG00000179909  
ENSG00000213753 ENSG00000179909  
ENSG00000267858 ENSG00000179909  
ENSG00000229754 ENSG00000179921  
ENSG00000261338 ENSG00000179921  
ENSG00000166770 ENSG00000179922  
ENSG00000267549 ENSG00000179922  
ENSG00000267577 ENSG00000179922  
ENSG00000276488 ENSG00000179922  
ENSG00000166770 ENSG00000179943  
ENSG00000240225 ENSG00000179943  
ENSG00000267265 ENSG00000179943  
ENSG00000267577 ENSG00000179943

|                 |                 |
|-----------------|-----------------|
| ENSG00000247317 | ENSG00000179950 |
| ENSG00000254859 | ENSG00000179950 |
| ENSG00000255050 | ENSG00000179950 |
| ENSG00000240225 | ENSG00000179954 |
| ENSG00000267265 | ENSG00000179954 |
| ENSG00000196810 | ENSG00000179979 |
| ENSG00000258413 | ENSG00000180008 |
| ENSG00000259868 | ENSG00000180008 |
| ENSG00000205534 | ENSG00000180035 |
| ENSG00000260083 | ENSG00000180035 |
| ENSG00000261346 | ENSG00000180035 |
| ENSG00000262721 | ENSG00000180035 |
| ENSG00000204860 | ENSG00000180071 |
| ENSG00000267265 | ENSG00000180089 |
| ENSG00000276570 | ENSG00000180089 |
| ENSG00000183604 | ENSG00000180096 |
| ENSG00000261346 | ENSG00000180096 |
| ENSG00000188242 | ENSG00000180104 |
| ENSG00000221990 | ENSG00000180104 |
| ENSG00000225138 | ENSG00000180104 |
| ENSG00000242125 | ENSG00000180198 |
| ENSG00000242779 | ENSG00000180257 |
| ENSG00000269535 | ENSG00000180257 |
| ENSG00000259635 | ENSG00000180304 |
| ENSG00000214425 | ENSG00000180340 |
| ENSG00000267394 | ENSG00000180340 |
| ENSG00000272758 | ENSG00000180353 |
| ENSG00000196295 | ENSG00000180354 |
| ENSG00000227855 | ENSG00000180354 |
| ENSG00000185485 | ENSG00000180370 |
| ENSG00000228925 | ENSG00000180398 |
| ENSG00000247675 | ENSG00000180423 |
| ENSG00000226237 | ENSG00000180447 |
| ENSG00000224905 | ENSG00000180530 |
| ENSG00000231201 | ENSG00000180530 |
| ENSG00000235609 | ENSG00000180530 |
| ENSG00000281903 | ENSG00000180530 |
| ENSG00000168405 | ENSG00000180573 |
| ENSG00000224843 | ENSG00000180573 |
| ENSG00000214776 | ENSG00000180574 |
| ENSG00000245648 | ENSG00000180574 |
| ENSG00000256888 | ENSG00000180574 |
| ENSG00000168405 | ENSG00000180596 |
| ENSG00000272558 | ENSG00000180596 |
| ENSG00000227036 | ENSG00000180616 |
| ENSG00000265010 | ENSG00000180616 |
| ENSG00000261879 | ENSG00000180626 |
| ENSG00000228983 | ENSG00000180638 |

ENSG00000262769 ENSG00000180638  
ENSG00000264932 ENSG00000180638  
ENSG00000259267 ENSG00000180644  
ENSG00000253738 ENSG00000180694  
ENSG00000255197 ENSG00000180720  
ENSG00000261879 ENSG00000180787  
ENSG00000259267 ENSG00000180817  
ENSG00000229754 ENSG00000180871  
ENSG00000271032 ENSG00000180884  
ENSG00000264112 ENSG00000180891  
ENSG00000265148 ENSG00000180891  
ENSG00000177335 ENSG00000180900  
ENSG00000247317 ENSG00000180900  
ENSG00000253931 ENSG00000180900  
ENSG00000206573 ENSG00000180914  
ENSG00000214353 ENSG00000180917  
ENSG00000203499 ENSG00000180921  
ENSG00000253931 ENSG00000180921  
ENSG00000254973 ENSG00000180921  
ENSG00000255050 ENSG00000180921  
ENSG00000253106 ENSG00000180938  
ENSG00000226471 ENSG00000180957  
ENSG00000235954 ENSG00000180957  
ENSG00000239407 ENSG00000180964  
ENSG00000258461 ENSG00000180979  
ENSG00000261684 ENSG00000180979  
ENSG00000261822 ENSG00000180979  
ENSG00000226851 ENSG00000181016  
ENSG00000196696 ENSG00000181019  
ENSG00000260999 ENSG00000181019  
ENSG00000255571 ENSG00000181026  
ENSG00000269487 ENSG00000181027  
ENSG00000268758 ENSG00000181029  
ENSG00000269680 ENSG00000181029  
ENSG00000262580 ENSG00000181045  
ENSG00000262585 ENSG00000181045  
ENSG00000247317 ENSG00000181085  
ENSG00000254973 ENSG00000181085  
ENSG00000250802 ENSG00000181104  
ENSG00000177335 ENSG00000181135  
ENSG00000247317 ENSG00000181135  
ENSG00000133624 ENSG00000181220  
ENSG00000215067 ENSG00000181284  
ENSG00000256806 ENSG00000181284  
ENSG00000175061 ENSG00000181350  
ENSG00000267698 ENSG00000181392  
ENSG00000279066 ENSG00000181396  
ENSG00000262115 ENSG00000181409

ENSG00000262580 ENSG00000181409  
ENSG00000263069 ENSG00000181409  
ENSG00000257346 ENSG00000181418  
ENSG00000257735 ENSG00000181418  
ENSG00000258101 ENSG00000181418  
ENSG00000213205 ENSG00000181444  
ENSG00000204650 ENSG00000181513  
ENSG00000214425 ENSG00000181513  
ENSG00000267121 ENSG00000181513  
ENSG00000267394 ENSG00000181513  
ENSG00000262580 ENSG00000181523  
ENSG00000262585 ENSG00000181523  
ENSG00000227398 ENSG00000181555  
ENSG00000237686 ENSG00000181577  
ENSG00000203499 ENSG00000181638  
ENSG00000247317 ENSG00000181638  
ENSG00000226416 ENSG00000181649  
ENSG00000238184 ENSG00000181649  
ENSG00000255367 ENSG00000181649  
ENSG00000269821 ENSG00000181649  
ENSG00000259976 ENSG00000181722  
ENSG00000254427 ENSG00000181830  
ENSG00000257809 ENSG00000181852  
ENSG00000258317 ENSG00000181852  
ENSG00000232098 ENSG00000181894  
ENSG00000269867 ENSG00000181894  
ENSG00000224186 ENSG00000181904  
ENSG00000273345 ENSG00000181904  
ENSG00000257588 ENSG00000181929  
ENSG00000257913 ENSG00000181929  
ENSG00000258017 ENSG00000181929  
ENSG00000258057 ENSG00000181929  
ENSG00000258101 ENSG00000181929  
ENSG00000258283 ENSG00000181929  
ENSG00000269514 ENSG00000181929  
ENSG00000274177 ENSG00000182087  
ENSG00000280486 ENSG00000182087  
ENSG00000263033 ENSG00000182108  
ENSG00000263307 ENSG00000182108  
ENSG00000203288 ENSG00000182134  
ENSG00000237975 ENSG00000182134  
ENSG00000249602 ENSG00000182134  
ENSG00000268081 ENSG00000182141  
ENSG00000268278 ENSG00000182141  
ENSG00000175611 ENSG00000182150  
ENSG00000225194 ENSG00000182150  
ENSG00000242338 ENSG00000182180  
ENSG00000271816 ENSG00000182180

ENSG00000233930 ENSG00000182208  
ENSG00000247970 ENSG00000182218  
ENSG00000248596 ENSG00000182230  
ENSG00000251458 ENSG00000182230  
ENSG00000197182 ENSG00000182257  
ENSG00000226328 ENSG00000182257  
ENSG00000235091 ENSG00000182257  
ENSG00000251661 ENSG00000182272  
ENSG00000255108 ENSG00000182272  
ENSG00000269915 ENSG00000182272  
ENSG00000281371 ENSG00000182287  
ENSG00000196922 ENSG00000182307  
ENSG00000176593 ENSG00000182318  
ENSG00000232098 ENSG00000182318  
ENSG00000267858 ENSG00000182318  
ENSG00000268230 ENSG00000182318  
ENSG00000268516 ENSG00000182318  
ENSG00000268895 ENSG00000182318  
ENSG00000269473 ENSG00000182318  
ENSG00000276449 ENSG00000182318  
ENSG00000232871 ENSG00000182324  
ENSG00000268530 ENSG00000182324  
ENSG00000219410 ENSG00000182326  
ENSG00000256433 ENSG00000182326  
ENSG00000256967 ENSG00000182326  
ENSG00000235085 ENSG00000182327  
ENSG00000261879 ENSG00000182327  
ENSG00000223901 ENSG00000182362  
ENSG00000259287 ENSG00000182405  
ENSG00000231703 ENSG00000182463  
ENSG00000271774 ENSG00000182463  
ENSG00000259736 ENSG00000182511  
ENSG00000277382 ENSG00000182534  
ENSG00000235078 ENSG00000182551  
ENSG00000275897 ENSG00000182575  
ENSG00000230753 ENSG00000182584  
ENSG00000265148 ENSG00000182628  
ENSG00000259905 ENSG00000182636  
ENSG00000259933 ENSG00000182685  
ENSG00000261532 ENSG00000182685  
ENSG00000249637 ENSG00000182700  
ENSG00000254363 ENSG00000182700  
ENSG00000244757 ENSG00000182752  
ENSG00000259736 ENSG00000182768  
ENSG00000260276 ENSG00000182831  
ENSG00000235085 ENSG00000182853  
ENSG00000261879 ENSG00000182853  
ENSG00000236065 ENSG00000182866

ENSG00000227039 ENSG00000182871  
ENSG00000260467 ENSG00000182885  
ENSG00000233382 ENSG00000182890  
ENSG00000258545 ENSG00000182890  
ENSG00000100181 ENSG00000182902  
ENSG00000236754 ENSG00000182902  
ENSG00000241717 ENSG00000182902  
ENSG00000280007 ENSG00000182902  
ENSG00000257271 ENSG00000182934  
ENSG00000225465 ENSG00000182944  
ENSG00000226471 ENSG00000182944  
ENSG00000224843 ENSG00000182952  
ENSG00000260005 ENSG00000183010  
ENSG00000233930 ENSG00000183020  
ENSG00000250397 ENSG00000183020  
ENSG00000254872 ENSG00000183020  
ENSG00000269915 ENSG00000183020  
ENSG00000260276 ENSG00000183044  
ENSG00000226137 ENSG00000183048  
ENSG00000233695 ENSG00000183087  
ENSG00000236520 ENSG00000183098  
ENSG00000278177 ENSG00000183098  
ENSG00000230551 ENSG00000183111  
ENSG00000253406 ENSG00000183111  
ENSG00000257221 ENSG00000183160  
ENSG00000237037 ENSG00000183172  
ENSG00000273366 ENSG00000183172  
ENSG00000266933 ENSG00000183186  
ENSG00000161643 ENSG00000183207  
ENSG00000246596 ENSG00000183258  
ENSG00000249129 ENSG00000183258  
ENSG00000268858 ENSG00000183260  
ENSG00000278126 ENSG00000183283  
ENSG00000267000 ENSG00000183287  
ENSG00000267272 ENSG00000183291  
ENSG00000237438 ENSG00000183307  
ENSG00000280007 ENSG00000183307  
ENSG00000267436 ENSG00000183397  
ENSG00000267551 ENSG00000183397  
ENSG00000250251 ENSG00000183426  
ENSG00000260735 ENSG00000183426  
ENSG00000182397 ENSG00000183475  
ENSG00000259363 ENSG00000183475  
ENSG00000272808 ENSG00000183475  
ENSG00000255769 ENSG00000183496  
ENSG00000259429 ENSG00000183496  
ENSG00000228486 ENSG00000183513  
ENSG00000228436 ENSG00000183520

ENSG00000247970 ENSG00000183576  
ENSG00000226471 ENSG00000183579  
ENSG00000236540 ENSG00000183597  
ENSG00000274602 ENSG00000183597  
ENSG00000231955 ENSG00000183671  
ENSG00000279220 ENSG00000183671  
ENSG00000182109 ENSG00000183682  
ENSG00000243970 ENSG00000183682  
ENSG00000263015 ENSG00000183688  
ENSG00000215483 ENSG00000183722  
ENSG00000260565 ENSG00000183751  
ENSG00000177993 ENSG00000183762  
ENSG00000225465 ENSG00000183762  
ENSG00000248932 ENSG00000183770  
ENSG00000224086 ENSG00000183773  
ENSG00000226872 ENSG00000183773  
ENSG00000230513 ENSG00000183773  
ENSG00000237476 ENSG00000183773  
ENSG00000272600 ENSG00000183773  
ENSG00000225330 ENSG00000183778  
ENSG00000253161 ENSG00000183779  
ENSG00000229771 ENSG00000183798  
ENSG00000248858 ENSG00000183808  
ENSG00000242622 ENSG00000183833  
ENSG00000232725 ENSG00000183837  
ENSG00000215067 ENSG00000183914  
ENSG00000235423 ENSG00000183955  
ENSG00000188825 ENSG00000183978  
ENSG00000213373 ENSG00000183978  
ENSG00000226137 ENSG00000184009  
ENSG00000229848 ENSG00000184009  
ENSG00000246273 ENSG00000184014  
ENSG00000256249 ENSG00000184047  
ENSG00000214719 ENSG00000184060  
ENSG00000248121 ENSG00000184060  
ENSG00000264538 ENSG00000184060  
ENSG00000251417 ENSG00000184110  
ENSG00000260853 ENSG00000184110  
ENSG00000232593 ENSG00000184194  
ENSG00000232593 ENSG00000184205  
ENSG00000261532 ENSG00000184207  
ENSG00000261971 ENSG00000184207  
ENSG00000226450 ENSG00000184208  
ENSG00000256249 ENSG00000184209  
ENSG00000232725 ENSG00000184216  
ENSG00000239462 ENSG00000184220  
ENSG00000259205 ENSG00000184254  
ENSG00000259381 ENSG00000184254

ENSG00000259583 ENSG00000184254  
ENSG00000236824 ENSG00000184261  
ENSG00000099869 ENSG00000184281  
ENSG00000238184 ENSG00000184281  
ENSG00000247473 ENSG00000184281  
ENSG00000269821 ENSG00000184281  
ENSG00000241560 ENSG00000184307  
ENSG00000243795 ENSG00000184307  
ENSG00000232725 ENSG00000184343  
ENSG00000255284 ENSG00000184363  
ENSG00000227963 ENSG00000184371  
ENSG00000237415 ENSG00000184371  
ENSG00000258634 ENSG00000184371  
ENSG00000244627 ENSG00000184381  
ENSG00000279080 ENSG00000184381  
ENSG00000247317 ENSG00000184428  
ENSG00000255050 ENSG00000184428  
ENSG00000244578 ENSG00000184432  
ENSG00000248932 ENSG00000184432  
ENSG00000230513 ENSG00000184436  
ENSG00000227704 ENSG00000184465  
ENSG00000178660 ENSG00000184500  
ENSG00000224441 ENSG00000184508  
ENSG00000258384 ENSG00000184508  
ENSG00000099869 ENSG00000184545  
ENSG00000130600 ENSG00000184545  
ENSG00000255108 ENSG00000184545  
ENSG00000255158 ENSG00000184545  
ENSG00000269915 ENSG00000184545  
ENSG00000226419 ENSG00000184599  
ENSG00000238198 ENSG00000184599  
ENSG00000263033 ENSG00000184602  
ENSG00000263307 ENSG00000184602  
ENSG00000266998 ENSG00000184640  
ENSG00000235437 ENSG00000184675  
ENSG00000203804 ENSG00000184678  
ENSG00000233030 ENSG00000184678  
ENSG00000237517 ENSG00000184702  
ENSG00000103472 ENSG00000184730  
ENSG00000198106 ENSG00000184730  
ENSG00000260517 ENSG00000184730  
ENSG00000260908 ENSG00000184730  
ENSG00000261067 ENSG00000184730  
ENSG00000275441 ENSG00000184730  
ENSG00000256789 ENSG00000184743  
ENSG00000226445 ENSG00000184786  
ENSG00000261003 ENSG00000184786  
ENSG00000227039 ENSG00000184787



|                 |                 |
|-----------------|-----------------|
| ENSG00000246596 | ENSG00000184840 |
| ENSG00000249129 | ENSG00000184840 |
| ENSG00000178146 | ENSG00000184867 |
| ENSG00000270050 | ENSG00000184867 |
| ENSG00000271147 | ENSG00000184867 |
| ENSG00000206417 | ENSG00000184897 |
| ENSG00000228252 | ENSG00000184897 |
| ENSG00000244300 | ENSG00000184897 |
| ENSG00000248916 | ENSG00000184897 |
| ENSG00000253540 | ENSG00000184897 |
| ENSG00000271270 | ENSG00000184897 |
| ENSG00000229880 | ENSG00000184900 |
| ENSG00000186715 | ENSG00000184908 |
| ENSG00000223482 | ENSG00000184923 |
| ENSG00000224914 | ENSG00000184923 |
| ENSG00000183242 | ENSG00000184937 |
| ENSG00000260441 | ENSG00000184939 |
| ENSG00000188825 | ENSG00000184988 |
| ENSG00000236383 | ENSG00000184988 |
| ENSG00000267002 | ENSG00000184988 |
| ENSG00000267765 | ENSG00000184988 |
| ENSG00000234149 | ENSG00000185009 |
| ENSG00000271848 | ENSG00000185009 |
| ENSG00000235958 | ENSG00000185019 |
| ENSG00000233739 | ENSG00000185022 |
| ENSG00000244627 | ENSG00000185022 |
| ENSG00000233728 | ENSG00000185090 |
| ENSG00000254559 | ENSG00000185101 |
| ENSG00000254872 | ENSG00000185101 |
| ENSG00000255284 | ENSG00000185101 |
| ENSG00000269915 | ENSG00000185101 |
| ENSG00000227742 | ENSG00000185104 |
| ENSG00000233058 | ENSG00000185112 |
| ENSG00000271662 | ENSG00000185112 |
| ENSG00000254859 | ENSG00000185122 |
| ENSG00000254973 | ENSG00000185122 |
| ENSG00000255050 | ENSG00000185122 |
| ENSG00000255085 | ENSG00000185122 |
| ENSG00000227704 | ENSG00000185127 |
| ENSG00000261465 | ENSG00000185164 |
| ENSG00000251661 | ENSG00000185187 |
| ENSG00000269915 | ENSG00000185187 |
| ENSG00000247317 | ENSG00000185189 |
| ENSG00000254859 | ENSG00000185189 |
| ENSG00000247095 | ENSG00000185201 |
| ENSG00000255108 | ENSG00000185201 |
| ENSG00000255284 | ENSG00000185201 |
| ENSG00000269915 | ENSG00000185201 |

ENSG00000234405 ENSG00000185222  
ENSG00000270050 ENSG00000185222  
ENSG00000271147 ENSG00000185222  
ENSG00000260273 ENSG00000185250  
ENSG00000161132 ENSG00000185252  
ENSG00000226872 ENSG00000185252  
ENSG00000267048 ENSG00000185324  
ENSG00000263033 ENSG00000185338  
ENSG00000263307 ENSG00000185338  
ENSG00000225465 ENSG00000185340  
ENSG00000226471 ENSG00000185340  
ENSG00000237015 ENSG00000185340  
ENSG00000226137 ENSG00000185359  
ENSG00000260005 ENSG00000185359  
ENSG00000262223 ENSG00000185359  
ENSG00000262662 ENSG00000185359  
ENSG00000266947 ENSG00000185379  
ENSG00000277089 ENSG00000185379  
ENSG00000226791 ENSG00000185414  
ENSG00000259658 ENSG00000185418  
ENSG00000259660 ENSG00000185418  
ENSG00000225315 ENSG00000185436  
ENSG00000232871 ENSG00000185453  
ENSG00000268583 ENSG00000185453  
ENSG00000251095 ENSG00000185477  
ENSG00000257303 ENSG00000185482  
ENSG00000223949 ENSG00000185483  
ENSG00000231064 ENSG00000185499  
ENSG00000229848 ENSG00000185504  
ENSG00000261924 ENSG00000185504  
ENSG00000262831 ENSG00000185504  
ENSG00000255158 ENSG00000185507  
ENSG00000254815 ENSG00000185522  
ENSG00000269915 ENSG00000185522  
ENSG00000214548 ENSG00000185559  
ENSG00000258663 ENSG00000185559  
ENSG00000186594 ENSG00000185561  
ENSG00000262791 ENSG00000185561  
ENSG00000239268 ENSG00000185565  
ENSG00000248265 ENSG00000185591  
ENSG00000248416 ENSG00000185619  
ENSG00000272588 ENSG00000185619  
ENSG00000257342 ENSG00000185633  
ENSG00000259488 ENSG00000185634  
ENSG00000254821 ENSG00000185689  
ENSG00000248124 ENSG00000185716  
ENSG00000128254 ENSG00000185721  
ENSG00000214076 ENSG00000185721

|                 |                 |
|-----------------|-----------------|
| ENSG00000230736 | ENSG00000185721 |
| ENSG00000250318 | ENSG00000185721 |
| ENSG00000263219 | ENSG00000185722 |
| ENSG00000247317 | ENSG00000185730 |
| ENSG00000267092 | ENSG00000185761 |
| ENSG00000259605 | ENSG00000185800 |
| ENSG00000267395 | ENSG00000185800 |
| ENSG00000228204 | ENSG00000185811 |
| ENSG00000262049 | ENSG00000185813 |
| ENSG00000262223 | ENSG00000185813 |
| ENSG00000259905 | ENSG00000185823 |
| ENSG00000232725 | ENSG00000185825 |
| ENSG00000260075 | ENSG00000185829 |
| ENSG00000272645 | ENSG00000185842 |
| ENSG00000263990 | ENSG00000185862 |
| ENSG00000264538 | ENSG00000185862 |
| ENSG00000189149 | ENSG00000185864 |
| ENSG00000248124 | ENSG00000185864 |
| ENSG00000267260 | ENSG00000185869 |
| ENSG00000267698 | ENSG00000185869 |
| ENSG00000251661 | ENSG00000185885 |
| ENSG00000254559 | ENSG00000185885 |
| ENSG00000255158 | ENSG00000185885 |
| ENSG00000255328 | ENSG00000185885 |
| ENSG00000233695 | ENSG00000185896 |
| ENSG00000103472 | ENSG00000185905 |
| ENSG00000260517 | ENSG00000185905 |
| ENSG00000260953 | ENSG00000185905 |
| ENSG00000275807 | ENSG00000185905 |
| ENSG00000235016 | ENSG00000185909 |
| ENSG00000175611 | ENSG00000185920 |
| ENSG00000225194 | ENSG00000185920 |
| ENSG00000236242 | ENSG00000185950 |
| ENSG00000187984 | ENSG00000185963 |
| ENSG00000225511 | ENSG00000185963 |
| ENSG00000236717 | ENSG00000185963 |
| ENSG00000228986 | ENSG00000185973 |
| ENSG00000226235 | ENSG00000186007 |
| ENSG00000231205 | ENSG00000186010 |
| ENSG00000266904 | ENSG00000186010 |
| ENSG00000267419 | ENSG00000186010 |
| ENSG00000248079 | ENSG00000186073 |
| ENSG00000211451 | ENSG00000186141 |
| ENSG00000234222 | ENSG00000186141 |
| ENSG00000255422 | ENSG00000186166 |
| ENSG00000255422 | ENSG00000186174 |
| ENSG00000180539 | ENSG00000186193 |
| ENSG00000260190 | ENSG00000186193 |

ENSG00000268996 ENSG00000186193  
ENSG00000267871 ENSG00000186230  
ENSG00000268230 ENSG00000186230  
ENSG00000268654 ENSG00000186230  
ENSG00000254528 ENSG00000186318  
ENSG00000278768 ENSG00000186318  
ENSG00000259448 ENSG00000186399  
ENSG00000259772 ENSG00000186399  
ENSG00000233382 ENSG00000186416  
ENSG00000250995 ENSG00000186416  
ENSG00000258545 ENSG00000186416  
ENSG00000259678 ENSG00000186417  
ENSG00000214820 ENSG00000186448  
ENSG00000236869 ENSG00000186448  
ENSG00000257267 ENSG00000186496  
ENSG00000268573 ENSG00000186496  
ENSG00000226526 ENSG00000186510  
ENSG00000228863 ENSG00000186517  
ENSG00000246477 ENSG00000186523  
ENSG00000255052 ENSG00000186523  
ENSG00000266903 ENSG00000186567  
ENSG00000225465 ENSG00000186575  
ENSG00000203499 ENSG00000186583  
ENSG00000254602 ENSG00000186660  
ENSG00000257913 ENSG00000186666  
ENSG00000258101 ENSG00000186666  
ENSG00000229848 ENSG00000186765  
ENSG00000260005 ENSG00000186765  
ENSG00000235437 ENSG00000186767  
ENSG00000268573 ENSG00000186814  
ENSG00000249550 ENSG00000186815  
ENSG00000267265 ENSG00000186818  
ENSG00000204650 ENSG00000186834  
ENSG00000224505 ENSG00000186834  
ENSG00000267121 ENSG00000186834  
ENSG00000182586 ENSG00000186866  
ENSG00000228404 ENSG00000186866  
ENSG00000235374 ENSG00000186866  
ENSG00000227775 ENSG00000186891  
ENSG00000230415 ENSG00000186891  
ENSG00000230699 ENSG00000186891  
ENSG00000268575 ENSG00000186891  
ENSG00000272512 ENSG00000186891  
ENSG00000197182 ENSG00000186951  
ENSG00000226471 ENSG00000186998  
ENSG00000228395 ENSG00000187024  
ENSG00000257524 ENSG00000187024  
ENSG00000223358 ENSG00000187068

ENSG00000235257 ENSG00000187091  
ENSG00000241015 ENSG00000187116  
ENSG00000267577 ENSG00000187116  
ENSG00000080947 ENSG00000187144  
ENSG00000268869 ENSG00000187144  
ENSG00000230615 ENSG00000187147  
ENSG00000258114 ENSG00000187164  
ENSG00000236326 ENSG00000187189  
ENSG00000240050 ENSG00000187189  
ENSG00000266903 ENSG00000187244  
ENSG00000267348 ENSG00000187244  
ENSG00000213205 ENSG00000187260  
ENSG00000234773 ENSG00000187266  
ENSG00000272154 ENSG00000187372  
ENSG00000278936 ENSG00000187372  
ENSG00000280029 ENSG00000187372  
ENSG00000174171 ENSG00000187446  
ENSG00000260160 ENSG00000187474  
ENSG00000269102 ENSG00000187474  
ENSG00000269535 ENSG00000187474  
ENSG00000246250 ENSG00000187479  
ENSG00000254409 ENSG00000187479  
ENSG00000184669 ENSG00000187486  
ENSG00000227105 ENSG00000187498  
ENSG00000255874 ENSG00000187498  
ENSG00000272645 ENSG00000187554  
ENSG00000217801 ENSG00000187583  
ENSG00000227775 ENSG00000187583  
ENSG00000237491 ENSG00000187583  
ENSG00000268575 ENSG00000187583  
ENSG00000227486 ENSG00000187601  
ENSG00000233966 ENSG00000187607  
ENSG00000227775 ENSG00000187608  
ENSG00000230699 ENSG00000187608  
ENSG00000237491 ENSG00000187608  
ENSG00000268575 ENSG00000187608  
ENSG00000255585 ENSG00000187609  
ENSG00000241525 ENSG00000187624  
ENSG00000215256 ENSG00000187630  
ENSG00000217801 ENSG00000187634  
ENSG00000227775 ENSG00000187634  
ENSG00000230415 ENSG00000187634  
ENSG00000268575 ENSG00000187634  
ENSG00000272512 ENSG00000187634  
ENSG00000223573 ENSG00000187650  
ENSG00000266983 ENSG00000187650  
ENSG00000267571 ENSG00000187650  
ENSG00000175061 ENSG00000187688

ENSG00000264739 ENSG00000187688  
ENSG00000228509 ENSG00000187699  
ENSG00000273066 ENSG00000187713  
ENSG00000223959 ENSG00000187741  
ENSG00000133519 ENSG00000187792  
ENSG00000178248 ENSG00000187792  
ENSG00000279467 ENSG00000187792  
ENSG00000280623 ENSG00000187792  
ENSG00000272068 ENSG00000187800  
ENSG00000233382 ENSG00000187808  
ENSG00000258545 ENSG00000187808  
ENSG00000263400 ENSG00000187824  
ENSG00000168405 ENSG00000187837  
ENSG00000224843 ENSG00000187837  
ENSG00000253161 ENSG00000187840  
ENSG00000253356 ENSG00000187840  
ENSG00000232600 ENSG00000187954  
ENSG00000254578 ENSG00000187954  
ENSG00000254973 ENSG00000187954  
ENSG00000255182 ENSG00000187954  
ENSG00000217801 ENSG00000187961  
ENSG00000227775 ENSG00000187961  
ENSG00000230092 ENSG00000187961  
ENSG00000237491 ENSG00000187961  
ENSG00000268575 ENSG00000187961  
ENSG00000269050 ENSG00000187994  
ENSG00000225670 ENSG00000188004  
ENSG00000227486 ENSG00000188021  
ENSG00000274020 ENSG00000188092  
ENSG00000278811 ENSG00000188092  
ENSG00000268575 ENSG00000188157  
ENSG00000180539 ENSG00000188163  
ENSG00000275549 ENSG00000188163  
ENSG00000251224 ENSG00000188167  
ENSG00000172965 ENSG00000188177  
ENSG00000189223 ENSG00000188177  
ENSG00000223973 ENSG00000188177  
ENSG00000243389 ENSG00000188177  
ENSG00000274272 ENSG00000188186  
ENSG00000184669 ENSG00000188211  
ENSG00000267254 ENSG00000188227  
ENSG00000267422 ENSG00000188227  
ENSG00000237886 ENSG00000188229  
ENSG00000255585 ENSG00000188229  
ENSG00000237840 ENSG00000188234  
ENSG00000117242 ENSG00000188257  
ENSG00000272084 ENSG00000188257  
ENSG00000259536 ENSG00000188277

ENSG00000229754 ENSG00000188282  
ENSG00000267309 ENSG00000188283  
ENSG00000223519 ENSG00000188295  
ENSG00000227671 ENSG00000188295  
ENSG00000227953 ENSG00000188295  
ENSG00000253704 ENSG00000188343  
ENSG00000213062 ENSG00000188404  
ENSG00000238221 ENSG00000188428  
ENSG00000259705 ENSG00000188467  
ENSG00000237118 ENSG00000188493  
ENSG00000154874 ENSG00000188522  
ENSG00000228983 ENSG00000188522  
ENSG00000262681 ENSG00000188522  
ENSG00000262769 ENSG00000188522  
ENSG00000225315 ENSG00000188529  
ENSG00000228201 ENSG00000188536  
ENSG00000236829 ENSG00000188536  
ENSG00000227479 ENSG00000188542  
ENSG00000259345 ENSG00000188549  
ENSG00000188825 ENSG00000188554  
ENSG00000213373 ENSG00000188554  
ENSG00000236383 ENSG00000188554  
ENSG00000273066 ENSG00000188566  
ENSG00000241570 ENSG00000188582  
ENSG00000103472 ENSG00000188603  
ENSG00000198106 ENSG00000188603  
ENSG00000260517 ENSG00000188603  
ENSG00000260908 ENSG00000188603  
ENSG00000225206 ENSG00000188641  
ENSG00000232878 ENSG00000188641  
ENSG00000272030 ENSG00000188643  
ENSG00000204706 ENSG00000188647  
ENSG00000268756 ENSG00000188766  
ENSG00000263400 ENSG00000188803  
ENSG00000264727 ENSG00000188803  
ENSG00000244158 ENSG00000188820  
ENSG00000205913 ENSG00000188827  
ENSG00000260565 ENSG00000188827  
ENSG00000261971 ENSG00000188827  
ENSG00000234773 ENSG00000188868  
ENSG00000225342 ENSG00000188906  
ENSG00000223528 ENSG00000188916  
ENSG00000171889 ENSG00000188921  
ENSG00000228863 ENSG00000188931  
ENSG00000187984 ENSG00000188938  
ENSG00000269946 ENSG00000188938  
ENSG00000177757 ENSG00000188976  
ENSG00000227775 ENSG00000188976

ENSG00000268575 ENSG00000188976  
ENSG00000250986 ENSG00000188981  
ENSG00000275549 ENSG00000188986  
ENSG00000246174 ENSG00000188997  
ENSG00000229036 ENSG00000189007  
ENSG00000233138 ENSG00000189007  
ENSG00000278206 ENSG00000189007  
ENSG00000183822 ENSG00000189060  
ENSG00000235237 ENSG00000189060  
ENSG00000244627 ENSG00000189060  
ENSG00000127957 ENSG00000189077  
ENSG00000230882 ENSG00000189077  
ENSG00000196696 ENSG00000189091  
ENSG00000261556 ENSG00000189091  
ENSG00000174353 ENSG00000189143  
ENSG00000214544 ENSG00000189143  
ENSG00000232729 ENSG00000189143  
ENSG00000243613 ENSG00000189171  
ENSG00000272030 ENSG00000189171  
ENSG00000276805 ENSG00000189180  
ENSG00000236276 ENSG00000189221  
ENSG00000240050 ENSG00000189241  
ENSG00000228643 ENSG00000189292  
ENSG00000172250 ENSG00000189306  
ENSG00000249456 ENSG00000189319  
ENSG00000272004 ENSG00000189339  
ENSG00000227542 ENSG00000189362  
ENSG00000228509 ENSG00000189362  
ENSG00000232725 ENSG00000189420  
ENSG00000266978 ENSG00000196110  
ENSG00000270049 ENSG00000196123  
ENSG00000235706 ENSG00000196136  
ENSG00000230408 ENSG00000196141  
ENSG00000232600 ENSG00000196150  
ENSG00000254578 ENSG00000196150  
ENSG00000257524 ENSG00000196152  
ENSG00000116883 ENSG00000196182  
ENSG00000227496 ENSG00000196187  
ENSG00000242861 ENSG00000196187  
ENSG00000206337 ENSG00000196230  
ENSG00000214894 ENSG00000196230  
ENSG00000214922 ENSG00000196230  
ENSG00000270604 ENSG00000196230  
ENSG00000271581 ENSG00000196230  
ENSG00000272221 ENSG00000196230  
ENSG00000166770 ENSG00000196263  
ENSG00000242779 ENSG00000196267  
ENSG00000267984 ENSG00000196267



ENSG00000269834 ENSG00000196267  
ENSG00000213976 ENSG00000196268  
ENSG00000268081 ENSG00000196268  
ENSG00000268555 ENSG00000196268  
ENSG00000268658 ENSG00000196268  
ENSG00000184616 ENSG00000196275  
ENSG00000232729 ENSG00000196275  
ENSG00000198106 ENSG00000196296  
ENSG00000260517 ENSG00000196296  
ENSG00000260853 ENSG00000196296  
ENSG00000261067 ENSG00000196296  
ENSG00000187984 ENSG00000196305  
ENSG00000203709 ENSG00000196352  
ENSG00000223804 ENSG00000196369  
ENSG00000274265 ENSG00000196369  
ENSG00000274642 ENSG00000196369  
ENSG00000250519 ENSG00000196371  
ENSG00000255929 ENSG00000196371  
ENSG00000215244 ENSG00000196372  
ENSG00000267422 ENSG00000196381  
ENSG00000224397 ENSG00000196396  
ENSG00000232043 ENSG00000196396  
ENSG00000214548 ENSG00000196405  
ENSG00000258663 ENSG00000196405  
ENSG00000259052 ENSG00000196405  
ENSG00000234614 ENSG00000196407  
ENSG00000237975 ENSG00000196407  
ENSG00000224729 ENSG00000196411  
ENSG00000241015 ENSG00000196417  
ENSG00000242779 ENSG00000196417  
ENSG00000225361 ENSG00000196422  
ENSG00000133624 ENSG00000196453  
ENSG00000248530 ENSG00000196455  
ENSG00000271270 ENSG00000196455  
ENSG00000250790 ENSG00000196458  
ENSG00000257809 ENSG00000196465  
ENSG00000258199 ENSG00000196465  
ENSG00000260517 ENSG00000196502  
ENSG00000236137 ENSG00000196505  
ENSG00000239407 ENSG00000196507  
ENSG00000270050 ENSG00000196507  
ENSG00000271147 ENSG00000196507  
ENSG00000255650 ENSG00000196510  
ENSG00000258210 ENSG00000196510  
ENSG00000230615 ENSG00000196517  
ENSG00000263266 ENSG00000196535  
ENSG00000264031 ENSG00000196535  
ENSG00000261790 ENSG00000196557

ENSG00000255438 ENSG00000196562  
ENSG00000226149 ENSG00000196569  
ENSG00000227945 ENSG00000196569  
ENSG00000230071 ENSG00000196588  
ENSG00000267106 ENSG00000196605  
ENSG00000237886 ENSG00000196642  
ENSG00000273066 ENSG00000196642  
ENSG00000237655 ENSG00000196659  
ENSG00000269243 ENSG00000196684  
ENSG00000185904 ENSG00000196693  
ENSG00000234420 ENSG00000196693  
ENSG00000240522 ENSG00000196705  
ENSG00000268278 ENSG00000196705  
ENSG00000214719 ENSG00000196712  
ENSG00000264538 ENSG00000196712  
ENSG00000266865 ENSG00000196712  
ENSG00000164669 ENSG00000196715  
ENSG00000224316 ENSG00000196715  
ENSG00000228409 ENSG00000196715  
ENSG00000230189 ENSG00000196715  
ENSG00000272693 ENSG00000196715  
ENSG00000176593 ENSG00000196724  
ENSG00000268516 ENSG00000196724  
ENSG00000269054 ENSG00000196724  
ENSG00000276449 ENSG00000196724  
ENSG00000223534 ENSG00000196735  
ENSG00000254333 ENSG00000196743  
ENSG00000266936 ENSG00000196757  
ENSG00000267277 ENSG00000196757  
ENSG00000239828 ENSG00000196776  
ENSG00000243701 ENSG00000196776  
ENSG00000271856 ENSG00000196776  
ENSG00000273125 ENSG00000196776  
ENSG00000196951 ENSG00000196782  
ENSG00000281706 ENSG00000196787  
ENSG00000236114 ENSG00000196793  
ENSG00000225339 ENSG00000196821  
ENSG00000204685 ENSG00000196843  
ENSG00000255650 ENSG00000196850  
ENSG00000258210 ENSG00000196850  
ENSG00000166770 ENSG00000196867  
ENSG00000267871 ENSG00000196867  
ENSG00000269696 ENSG00000196867  
ENSG00000203706 ENSG00000196878  
ENSG00000236136 ENSG00000196878  
ENSG00000240050 ENSG00000196911  
ENSG00000248996 ENSG00000196923  
ENSG00000232725 ENSG00000196924

ENSG00000237233 ENSG00000196932  
ENSG00000240499 ENSG00000196937  
ENSG00000157306 ENSG00000196943  
ENSG00000131401 ENSG00000196961  
ENSG00000235316 ENSG00000196968  
ENSG00000242338 ENSG00000196968  
ENSG00000250959 ENSG00000196968  
ENSG00000271816 ENSG00000196968  
ENSG00000271848 ENSG00000196968  
ENSG00000272140 ENSG00000196968  
ENSG00000272589 ENSG00000196968  
ENSG00000272758 ENSG00000196981  
ENSG00000164669 ENSG00000197008  
ENSG00000224316 ENSG00000197008  
ENSG00000268081 ENSG00000197013  
ENSG00000268278 ENSG00000197013  
ENSG00000268555 ENSG00000197013  
ENSG00000268658 ENSG00000197013  
ENSG00000166770 ENSG00000197016  
ENSG00000269696 ENSG00000197016  
ENSG00000276578 ENSG00000197016  
ENSG00000256612 ENSG00000197019  
ENSG00000268278 ENSG00000197020  
ENSG00000133624 ENSG00000197024  
ENSG00000204934 ENSG00000197024  
ENSG00000244219 ENSG00000197037  
ENSG00000197083 ENSG00000197043  
ENSG00000270978 ENSG00000197043  
ENSG00000234773 ENSG00000197044  
ENSG00000267082 ENSG00000197044  
ENSG00000233527 ENSG00000197050  
ENSG00000213073 ENSG00000197081  
ENSG00000271913 ENSG00000197081  
ENSG00000078319 ENSG00000197093  
ENSG00000258959 ENSG00000197102  
ENSG00000248265 ENSG00000197111  
ENSG00000250742 ENSG00000197111  
ENSG00000258086 ENSG00000197111  
ENSG00000229873 ENSG00000197114  
ENSG00000273759 ENSG00000197114  
ENSG00000214548 ENSG00000197119  
ENSG00000258666 ENSG00000197119  
ENSG00000258982 ENSG00000197119  
ENSG00000229056 ENSG00000197121  
ENSG00000245156 ENSG00000197136  
ENSG00000245532 ENSG00000197136  
ENSG00000254614 ENSG00000197136  
ENSG00000255478 ENSG00000197136

ENSG00000243433 ENSG00000197150  
ENSG00000240758 ENSG00000197157  
ENSG00000242588 ENSG00000197157  
ENSG00000280828 ENSG00000197157  
ENSG00000183604 ENSG00000197162  
ENSG00000232748 ENSG00000197162  
ENSG00000238045 ENSG00000197162  
ENSG00000250616 ENSG00000197162  
ENSG00000261346 ENSG00000197162  
ENSG00000273066 ENSG00000197191  
ENSG00000230612 ENSG00000197208  
ENSG00000233006 ENSG00000197208  
ENSG00000253125 ENSG00000197217  
ENSG00000253837 ENSG00000197217  
ENSG00000245317 ENSG00000197226  
ENSG00000204188 ENSG00000197283  
ENSG00000225339 ENSG00000197283  
ENSG00000223891 ENSG00000197296  
ENSG00000244558 ENSG00000197296  
ENSG00000260083 ENSG00000197302  
ENSG00000260911 ENSG00000197302  
ENSG00000262721 ENSG00000197302  
ENSG00000204365 ENSG00000197321  
ENSG00000224597 ENSG00000197321  
ENSG00000157306 ENSG00000197324  
ENSG00000251002 ENSG00000197324  
ENSG00000264527 ENSG00000197355  
ENSG00000268981 ENSG00000197372  
ENSG00000269837 ENSG00000197372  
ENSG00000223442 ENSG00000197375  
ENSG00000233006 ENSG00000197375  
ENSG00000235374 ENSG00000197381  
ENSG00000261643 ENSG00000197386  
ENSG00000224843 ENSG00000197409  
ENSG00000240875 ENSG00000197415  
ENSG00000243176 ENSG00000197415  
ENSG00000240898 ENSG00000197417  
ENSG00000262903 ENSG00000197417  
ENSG00000237596 ENSG00000197442  
ENSG00000229153 ENSG00000197448  
ENSG00000244198 ENSG00000197448  
ENSG00000229261 ENSG00000197467  
ENSG00000198106 ENSG00000197471  
ENSG00000205534 ENSG00000197471  
ENSG00000260517 ENSG00000197471  
ENSG00000267265 ENSG00000197483  
ENSG00000267549 ENSG00000197483  
ENSG00000231889 ENSG00000197498

ENSG00000231616 ENSG00000197506  
ENSG00000233262 ENSG00000197506  
ENSG00000269737 ENSG00000197530  
ENSG00000272106 ENSG00000197530  
ENSG00000259438 ENSG00000197535  
ENSG00000230612 ENSG00000197536  
ENSG00000213963 ENSG00000197557  
ENSG00000237298 ENSG00000197557  
ENSG00000237655 ENSG00000197557  
ENSG00000264666 ENSG00000197566  
ENSG00000229956 ENSG00000197568  
ENSG00000261641 ENSG00000197599  
ENSG00000242779 ENSG00000197608  
ENSG00000260160 ENSG00000197608  
ENSG00000268970 ENSG00000197608  
ENSG00000269235 ENSG00000197619  
ENSG00000203288 ENSG00000197622  
ENSG00000229021 ENSG00000197622  
ENSG00000255139 ENSG00000197629  
ENSG00000226121 ENSG00000197635  
ENSG00000227403 ENSG00000197635  
ENSG00000230918 ENSG00000197635  
ENSG00000235724 ENSG00000197635  
ENSG00000204054 ENSG00000197694  
ENSG00000204055 ENSG00000197694  
ENSG00000228395 ENSG00000197694  
ENSG00000257524 ENSG00000197694  
ENSG00000176700 ENSG00000197696  
ENSG00000189136 ENSG00000197696  
ENSG00000259367 ENSG00000197696  
ENSG00000249207 ENSG00000197712  
ENSG00000166770 ENSG00000197714  
ENSG00000267549 ENSG00000197714  
ENSG00000267871 ENSG00000197714  
ENSG00000187984 ENSG00000197724  
ENSG00000230262 ENSG00000197724  
ENSG00000269946 ENSG00000197724  
ENSG00000229021 ENSG00000197747  
ENSG00000237975 ENSG00000197747  
ENSG00000248265 ENSG00000197757  
ENSG00000258086 ENSG00000197757  
ENSG00000248557 ENSG00000197763  
ENSG00000250934 ENSG00000197763  
ENSG00000251448 ENSG00000197763  
ENSG00000260316 ENSG00000197774  
ENSG00000214900 ENSG00000197776  
ENSG00000258377 ENSG00000197776  
ENSG00000260879 ENSG00000197780

ENSG00000230092 ENSG00000197785  
ENSG00000237491 ENSG00000197785  
ENSG00000203999 ENSG00000197818  
ENSG00000179978 ENSG00000197822  
ENSG00000226259 ENSG00000197822  
ENSG00000261324 ENSG00000197837  
ENSG00000227811 ENSG00000197852  
ENSG00000231346 ENSG00000197852  
ENSG00000267698 ENSG00000197863  
ENSG00000263015 ENSG00000197879  
ENSG00000251191 ENSG00000197892  
ENSG00000254129 ENSG00000197892  
ENSG00000250770 ENSG00000197905  
ENSG00000237975 ENSG00000197915  
ENSG00000214922 ENSG00000197935  
ENSG00000228323 ENSG00000197937  
ENSG00000269102 ENSG00000197937  
ENSG00000269535 ENSG00000197937  
ENSG00000254099 ENSG00000197948  
ENSG00000272154 ENSG00000197948  
ENSG00000278936 ENSG00000197948  
ENSG00000280029 ENSG00000197948  
ENSG00000267096 ENSG00000197951  
ENSG00000267523 ENSG00000197951  
ENSG00000269696 ENSG00000197951  
ENSG00000272030 ENSG00000197956  
ENSG00000219665 ENSG00000198003  
ENSG00000187481 ENSG00000198019  
ENSG00000227082 ENSG00000198019  
ENSG00000204044 ENSG00000198026  
ENSG00000269549 ENSG00000198026  
ENSG00000166770 ENSG00000198046  
ENSG00000269696 ENSG00000198046  
ENSG00000276449 ENSG00000198046  
ENSG00000246596 ENSG00000198055  
ENSG00000247679 ENSG00000198055  
ENSG00000264449 ENSG00000198081  
ENSG00000264575 ENSG00000198081  
ENSG00000264707 ENSG00000198081  
ENSG00000182310 ENSG00000198093  
ENSG00000269959 ENSG00000198093  
ENSG00000276805 ENSG00000198105  
ENSG00000180539 ENSG00000198113  
ENSG00000228544 ENSG00000198113  
ENSG00000237886 ENSG00000198113  
ENSG00000260190 ENSG00000198113  
ENSG00000273066 ENSG00000198113  
ENSG00000268201 ENSG00000198131

ENSG00000268516 ENSG00000198131  
ENSG00000248079 ENSG00000198146  
ENSG00000259516 ENSG00000198146  
ENSG00000259917 ENSG00000198146  
ENSG00000278530 ENSG00000198157  
ENSG00000236137 ENSG00000198162  
ENSG00000227533 ENSG00000198198  
ENSG00000230615 ENSG00000198198  
ENSG00000237356 ENSG00000198252  
ENSG00000280213 ENSG00000198276  
ENSG00000236708 ENSG00000198286  
ENSG00000237286 ENSG00000198286  
ENSG00000166770 ENSG00000198300  
ENSG00000267549 ENSG00000198300  
ENSG00000268379 ENSG00000198300  
ENSG00000272009 ENSG00000198315  
ENSG00000248265 ENSG00000198353  
ENSG00000257337 ENSG00000198353  
ENSG00000196696 ENSG00000198373  
ENSG00000260999 ENSG00000198373  
ENSG00000261777 ENSG00000198373  
ENSG00000241170 ENSG00000198382  
ENSG00000159860 ENSG00000198420  
ENSG00000229153 ENSG00000198420  
ENSG00000244198 ENSG00000198420  
ENSG00000244479 ENSG00000198420  
ENSG00000253882 ENSG00000198420  
ENSG00000219665 ENSG00000198429  
ENSG00000257732 ENSG00000198431  
ENSG00000267698 ENSG00000198453  
ENSG00000242779 ENSG00000198464  
ENSG00000268015 ENSG00000198464  
ENSG00000269102 ENSG00000198464  
ENSG00000269535 ENSG00000198464  
ENSG00000267858 ENSG00000198466  
ENSG00000227388 ENSG00000198467  
ENSG00000242779 ENSG00000198482  
ENSG00000269535 ENSG00000198482  
ENSG00000269834 ENSG00000198482  
ENSG00000229391 ENSG00000198502  
ENSG00000230487 ENSG00000198517  
ENSG00000268038 ENSG00000198521  
ENSG00000268555 ENSG00000198521  
ENSG00000268981 ENSG00000198521  
ENSG00000213801 ENSG00000198538  
ENSG00000269535 ENSG00000198538  
ENSG00000166917 ENSG00000198546  
ENSG00000214279 ENSG00000198546

ENSG00000219665 ENSG00000198551  
ENSG00000078319 ENSG00000198556  
ENSG00000242294 ENSG00000198556  
ENSG00000242798 ENSG00000198556  
ENSG00000272752 ENSG00000198556  
ENSG00000206337 ENSG00000198563  
ENSG00000177335 ENSG00000198576  
ENSG00000247317 ENSG00000198576  
ENSG00000249035 ENSG00000198624  
ENSG00000254333 ENSG00000198624  
ENSG00000171889 ENSG00000198642  
ENSG00000251314 ENSG00000198677  
ENSG00000196566 ENSG00000198682  
ENSG00000225913 ENSG00000198682  
ENSG00000223396 ENSG00000198700  
ENSG00000231871 ENSG00000198700  
ENSG00000235121 ENSG00000198700  
ENSG00000258949 ENSG00000198718  
ENSG00000264031 ENSG00000198720  
ENSG00000254821 ENSG00000198721  
ENSG00000215199 ENSG00000198722  
ENSG00000227388 ENSG00000198722  
ENSG00000226009 ENSG00000198728  
ENSG00000259158 ENSG00000198732  
ENSG00000231407 ENSG00000198734  
ENSG00000236155 ENSG00000198746  
ENSG00000232725 ENSG00000198753  
ENSG00000182109 ENSG00000198754  
ENSG00000237899 ENSG00000198754  
ENSG00000243970 ENSG00000198754  
ENSG00000241720 ENSG00000198758  
ENSG00000233360 ENSG00000198792  
ENSG00000279080 ENSG00000198792  
ENSG00000230337 ENSG00000198793  
ENSG00000260269 ENSG00000198794  
ENSG00000267787 ENSG00000198796  
ENSG00000254154 ENSG00000198797  
ENSG00000238198 ENSG00000198799  
ENSG00000241886 ENSG00000198814  
ENSG00000243055 ENSG00000198814  
ENSG00000227533 ENSG00000198815  
ENSG00000240602 ENSG00000198829  
ENSG00000243305 ENSG00000198829  
ENSG00000228172 ENSG00000198830  
ENSG00000241313 ENSG00000198843  
ENSG00000255422 ENSG00000198851  
ENSG00000227388 ENSG00000198853  
ENSG00000213373 ENSG00000198863



ENSG00000177738 ENSG00000198865  
ENSG00000215068 ENSG00000198865  
ENSG00000272234 ENSG00000198865  
ENSG00000226562 ENSG00000198876  
ENSG00000235481 ENSG00000198876  
ENSG00000204685 ENSG00000198885  
ENSG00000204706 ENSG00000198887  
ENSG00000231871 ENSG00000198892  
ENSG00000214188 ENSG00000198898  
ENSG00000226367 ENSG00000198898  
ENSG00000232725 ENSG00000198910  
ENSG00000172250 ENSG00000198911  
ENSG00000226450 ENSG00000198911  
ENSG00000235513 ENSG00000198911  
ENSG00000237037 ENSG00000198911  
ENSG00000257524 ENSG00000198917  
ENSG00000182376 ENSG00000198931  
ENSG00000261273 ENSG00000198931  
ENSG00000261744 ENSG00000198931  
ENSG00000178146 ENSG00000198932  
ENSG00000239407 ENSG00000198932  
ENSG00000270050 ENSG00000198932  
ENSG00000271147 ENSG00000198932  
ENSG00000263142 ENSG00000198933  
ENSG00000254035 ENSG00000198939  
ENSG00000237037 ENSG00000198951  
ENSG00000270083 ENSG00000198951  
ENSG00000272405 ENSG00000198952  
ENSG00000224635 ENSG00000198959  
ENSG00000249476 ENSG00000198961  
ENSG00000226200 ENSG00000198964  
ENSG00000235618 ENSG00000198964  
ENSG00000264204 ENSG00000198964  
ENSG00000272195 ENSG00000203666  
ENSG00000227496 ENSG00000203685  
ENSG00000203709 ENSG00000203710  
ENSG00000233452 ENSG00000203727  
ENSG00000231329 ENSG00000203734  
ENSG00000214279 ENSG00000203772  
ENSG00000233334 ENSG00000203791  
ENSG00000237781 ENSG00000203814  
ENSG00000277147 ENSG00000203814  
ENSG00000203855 ENSG00000203859  
ENSG00000227712 ENSG00000203859  
ENSG00000231365 ENSG00000203859  
ENSG00000232725 ENSG00000203879  
ENSG00000260081 ENSG00000203879  
ENSG00000237686 ENSG00000204052

ENSG00000231728 ENSG00000204065  
ENSG00000270050 ENSG00000204071  
ENSG00000271147 ENSG00000204071  
ENSG00000226648 ENSG00000204103  
ENSG00000178440 ENSG00000204149  
ENSG00000178440 ENSG00000204152  
ENSG00000235618 ENSG00000204152  
ENSG00000189014 ENSG00000204172  
ENSG00000231964 ENSG00000204179  
ENSG00000243349 ENSG00000204179  
ENSG00000223725 ENSG00000204186  
ENSG00000225216 ENSG00000204186  
ENSG00000229647 ENSG00000204186  
ENSG00000279220 ENSG00000204186  
ENSG00000225315 ENSG00000204219  
ENSG00000225339 ENSG00000204220  
ENSG00000229391 ENSG00000204220  
ENSG00000229391 ENSG00000204231  
ENSG00000260011 ENSG00000204237  
ENSG00000204188 ENSG00000204248  
ENSG00000204188 ENSG00000204252  
ENSG00000204261 ENSG00000204252  
ENSG00000229391 ENSG00000204252  
ENSG00000263756 ENSG00000204257  
ENSG00000204261 ENSG00000204264  
ENSG00000274259 ENSG00000204264  
ENSG00000204188 ENSG00000204267  
ENSG00000227486 ENSG00000204272  
ENSG00000204261 ENSG00000204287  
ENSG00000206337 ENSG00000204287  
ENSG00000237461 ENSG00000204291  
ENSG00000206337 ENSG00000204304  
ENSG00000227939 ENSG00000204304  
ENSG00000206337 ENSG00000204305  
ENSG00000271581 ENSG00000204305  
ENSG00000206337 ENSG00000204308  
ENSG00000204338 ENSG00000204310  
ENSG00000206337 ENSG00000204310  
ENSG00000237298 ENSG00000204311  
ENSG00000237655 ENSG00000204311  
ENSG00000206337 ENSG00000204314  
ENSG00000229391 ENSG00000204314  
ENSG00000271581 ENSG00000204314  
ENSG00000204261 ENSG00000204315  
ENSG00000267801 ENSG00000204316  
ENSG00000163597 ENSG00000204323  
ENSG00000204338 ENSG00000204344  
ENSG00000206337 ENSG00000204344

ENSG00000225914 ENSG00000204344  
ENSG00000271581 ENSG00000204344  
ENSG00000206337 ENSG00000204348  
ENSG00000204338 ENSG00000204351  
ENSG00000206337 ENSG00000204356  
ENSG00000229391 ENSG00000204356  
ENSG00000204261 ENSG00000204366  
ENSG00000206337 ENSG00000204366  
ENSG00000229391 ENSG00000204366  
ENSG00000206337 ENSG00000204371  
ENSG00000225914 ENSG00000204371  
ENSG00000229391 ENSG00000204371  
ENSG00000206337 ENSG00000204386  
ENSG00000214892 ENSG00000204386  
ENSG00000229391 ENSG00000204386  
ENSG00000272221 ENSG00000204386  
ENSG00000206337 ENSG00000204394  
ENSG00000229391 ENSG00000204394  
ENSG00000206337 ENSG00000204396  
ENSG00000214894 ENSG00000204396  
ENSG00000229391 ENSG00000204396  
ENSG00000206337 ENSG00000204410  
ENSG00000229391 ENSG00000204410  
ENSG00000204338 ENSG00000204439  
ENSG00000206337 ENSG00000204439  
ENSG00000214894 ENSG00000204439  
ENSG00000206337 ENSG00000204444  
ENSG00000214894 ENSG00000204444  
ENSG00000229391 ENSG00000204444  
ENSG00000214894 ENSG00000204463  
ENSG00000214894 ENSG00000204469  
ENSG00000229391 ENSG00000204469  
ENSG00000271581 ENSG00000204469  
ENSG00000206337 ENSG00000204472  
ENSG00000224328 ENSG00000204472  
ENSG00000272501 ENSG00000204472  
ENSG00000204338 ENSG00000204482  
ENSG00000206337 ENSG00000204482  
ENSG00000214894 ENSG00000204482  
ENSG00000225914 ENSG00000204482  
ENSG00000229391 ENSG00000204482  
ENSG00000272221 ENSG00000204482  
ENSG00000235663 ENSG00000204498  
ENSG00000206337 ENSG00000204516  
ENSG00000272221 ENSG00000204516  
ENSG00000176593 ENSG00000204519  
ENSG00000268379 ENSG00000204519  
ENSG00000206337 ENSG00000204520

ENSG00000206337 ENSG00000204536  
ENSG00000272501 ENSG00000204536  
ENSG00000206337 ENSG00000204560  
ENSG00000214922 ENSG00000204560  
ENSG00000224328 ENSG00000204560  
ENSG00000230795 ENSG00000204560  
ENSG00000272221 ENSG00000204560  
ENSG00000206337 ENSG00000204576  
ENSG00000206341 ENSG00000204576  
ENSG00000214894 ENSG00000204576  
ENSG00000236475 ENSG00000204576  
ENSG00000270604 ENSG00000204576  
ENSG00000206337 ENSG00000204580  
ENSG00000214892 ENSG00000204580  
ENSG00000214894 ENSG00000204580  
ENSG00000270604 ENSG00000204580  
ENSG00000181126 ENSG00000204590  
ENSG00000206337 ENSG00000204590  
ENSG00000214894 ENSG00000204590  
ENSG00000214922 ENSG00000204590  
ENSG00000236475 ENSG00000204590  
ENSG00000270604 ENSG00000204590  
ENSG00000271821 ENSG00000204590  
ENSG00000181126 ENSG00000204592  
ENSG00000206337 ENSG00000204592  
ENSG00000214894 ENSG00000204592  
ENSG00000242779 ENSG00000204604  
ENSG00000213801 ENSG00000204611  
ENSG00000269102 ENSG00000204611  
ENSG00000269235 ENSG00000204611  
ENSG00000269535 ENSG00000204611  
ENSG00000269834 ENSG00000204611  
ENSG00000206341 ENSG00000204618  
ENSG00000227766 ENSG00000204618  
ENSG00000230795 ENSG00000204618  
ENSG00000270604 ENSG00000204618  
ENSG00000181126 ENSG00000204619  
ENSG00000204622 ENSG00000204619  
ENSG00000214922 ENSG00000204619  
ENSG00000233892 ENSG00000204619  
ENSG00000237669 ENSG00000204619  
ENSG00000270604 ENSG00000204619  
ENSG00000233937 ENSG00000204628  
ENSG00000248367 ENSG00000204628  
ENSG00000181126 ENSG00000204642  
ENSG00000206341 ENSG00000204642  
ENSG00000214922 ENSG00000204642  
ENSG00000225864 ENSG00000204642

ENSG00000180279 ENSG00000204673  
ENSG00000246596 ENSG00000204677  
ENSG00000227766 ENSG00000204681  
ENSG00000236475 ENSG00000204681  
ENSG00000270604 ENSG00000204681  
ENSG00000214922 ENSG00000204713  
ENSG00000225173 ENSG00000204713  
ENSG00000269293 ENSG00000204713  
ENSG00000163016 ENSG00000204822  
ENSG00000272711 ENSG00000204822  
ENSG00000254859 ENSG00000204839  
ENSG00000255050 ENSG00000204839  
ENSG00000217702 ENSG00000204843  
ENSG00000236209 ENSG00000204843  
ENSG00000259605 ENSG00000204851  
ENSG00000268460 ENSG00000204851  
ENSG00000255650 ENSG00000204852  
ENSG00000258210 ENSG00000204852  
ENSG00000255650 ENSG00000204856  
ENSG00000258210 ENSG00000204856  
ENSG00000244560 ENSG00000204946  
ENSG00000271664 ENSG00000204946  
ENSG00000273419 ENSG00000204946  
ENSG00000257681 ENSG00000204954  
ENSG00000146001 ENSG00000204956  
ENSG00000280029 ENSG00000204956  
ENSG00000278936 ENSG00000204963  
ENSG00000280029 ENSG00000204963  
ENSG00000249637 ENSG00000204967  
ENSG00000272154 ENSG00000204967  
ENSG00000280029 ENSG00000204967  
ENSG00000233672 ENSG00000204977  
ENSG00000274270 ENSG00000204977  
ENSG00000273297 ENSG00000205060  
ENSG00000242588 ENSG00000205085  
ENSG00000242902 ENSG00000205085  
ENSG00000243302 ENSG00000205085  
ENSG00000243679 ENSG00000205085  
ENSG00000273270 ENSG00000205085  
ENSG00000280828 ENSG00000205085  
ENSG00000237491 ENSG00000205090  
ENSG00000269896 ENSG00000205090  
ENSG00000248858 ENSG00000205133  
ENSG00000225872 ENSG00000205138  
ENSG00000267698 ENSG00000205138  
ENSG00000251429 ENSG00000205208  
ENSG00000245573 ENSG00000205213  
ENSG00000254934 ENSG00000205213

ENSG00000170629 ENSG00000205238  
ENSG00000230257 ENSG00000205238  
ENSG00000239486 ENSG00000205238  
ENSG00000247925 ENSG00000205269  
ENSG00000258199 ENSG00000205323  
ENSG00000260467 ENSG00000205336  
ENSG00000246273 ENSG00000205339  
ENSG00000254860 ENSG00000205339  
ENSG00000257337 ENSG00000205352  
ENSG00000247950 ENSG00000205403  
ENSG00000236861 ENSG00000205413  
ENSG00000260381 ENSG00000205423  
ENSG00000247970 ENSG00000205476  
ENSG00000258666 ENSG00000205476  
ENSG00000234773 ENSG00000205517  
ENSG00000238184 ENSG00000205531  
ENSG00000255367 ENSG00000205531  
ENSG00000248664 ENSG00000205572  
ENSG00000184319 ENSG00000205593  
ENSG00000273137 ENSG00000205593  
ENSG00000251417 ENSG00000205609  
ENSG00000260517 ENSG00000205609  
ENSG00000258603 ENSG00000205669  
ENSG00000267072 ENSG00000205832  
ENSG00000187953 ENSG00000205903  
ENSG00000228010 ENSG00000205903  
ENSG00000230825 ENSG00000205903  
ENSG00000205930 ENSG00000205929  
ENSG00000215256 ENSG00000205978  
ENSG00000255198 ENSG00000206053  
ENSG00000259933 ENSG00000206053  
ENSG00000260316 ENSG00000206053  
ENSG00000224078 ENSG00000206190  
ENSG00000244578 ENSG00000206262  
ENSG00000248932 ENSG00000206262  
ENSG00000272501 ENSG00000206344  
ENSG00000266708 ENSG00000206418  
ENSG00000263753 ENSG00000206432  
ENSG00000264449 ENSG00000206432  
ENSG00000227766 ENSG00000206503  
ENSG00000243795 ENSG00000206530  
ENSG00000243849 ENSG00000206530  
ENSG00000281392 ENSG00000206538  
ENSG00000225733 ENSG00000206561  
ENSG00000225733 ENSG00000206562  
ENSG00000249786 ENSG00000206562  
ENSG00000197083 ENSG00000211445  
ENSG00000257261 ENSG00000211584

ENSG00000257735 ENSG00000211584  
ENSG00000269802 ENSG00000212123  
ENSG00000237886 ENSG00000212864  
ENSG00000255585 ENSG00000212864  
ENSG00000241015 ENSG00000213020  
ENSG00000242779 ENSG00000213020  
ENSG00000267809 ENSG00000213020  
ENSG00000269102 ENSG00000213020  
ENSG00000269535 ENSG00000213020  
ENSG00000228863 ENSG00000213085  
ENSG00000197099 ENSG00000213139  
ENSG00000243433 ENSG00000213199  
ENSG00000228544 ENSG00000213213  
ENSG00000264527 ENSG00000213213  
ENSG00000273066 ENSG00000213213  
ENSG00000265148 ENSG00000213246  
ENSG00000226167 ENSG00000213281  
ENSG00000266978 ENSG00000213339  
ENSG00000224699 ENSG00000213366  
ENSG00000227963 ENSG00000213366  
ENSG00000241720 ENSG00000213366  
ENSG00000273373 ENSG00000213366  
ENSG00000196696 ENSG00000213380  
ENSG00000261777 ENSG00000213380  
ENSG00000232725 ENSG00000213397  
ENSG00000261386 ENSG00000213398  
ENSG00000263276 ENSG00000213398  
ENSG00000270049 ENSG00000213398  
ENSG00000078319 ENSG00000213420  
ENSG00000242294 ENSG00000213420  
ENSG00000242798 ENSG00000213420  
ENSG00000272752 ENSG00000213420  
ENSG00000245532 ENSG00000213445  
ENSG00000255478 ENSG00000213445  
ENSG00000226002 ENSG00000213462  
ENSG00000227113 ENSG00000213462  
ENSG00000234585 ENSG00000213462  
ENSG00000225492 ENSG00000213516  
ENSG00000230735 ENSG00000213516  
ENSG00000237505 ENSG00000213516  
ENSG00000249637 ENSG00000213523  
ENSG00000272154 ENSG00000213523  
ENSG00000280029 ENSG00000213523  
ENSG00000273345 ENSG00000213585  
ENSG00000254602 ENSG00000213593  
ENSG00000260339 ENSG00000213614  
ENSG00000261423 ENSG00000213614  
ENSG00000261460 ENSG00000213614

ENSG00000280486 ENSG00000213638  
ENSG00000204338 ENSG00000213654  
ENSG00000206337 ENSG00000213654  
ENSG00000214892 ENSG00000213654  
ENSG00000225914 ENSG00000213654  
ENSG00000272501 ENSG00000213654  
ENSG00000198106 ENSG00000213658  
ENSG00000260367 ENSG00000213658  
ENSG00000260517 ENSG00000213658  
ENSG00000260853 ENSG00000213658  
ENSG00000261067 ENSG00000213658  
ENSG00000261552 ENSG00000213658  
ENSG00000224424 ENSG00000213672  
ENSG00000270441 ENSG00000213672  
ENSG00000244380 ENSG00000213689  
ENSG00000206337 ENSG00000213719  
ENSG00000229391 ENSG00000213719  
ENSG00000271581 ENSG00000213719  
ENSG00000214894 ENSG00000213722  
ENSG00000235663 ENSG00000213722  
ENSG00000206337 ENSG00000213760  
ENSG00000206337 ENSG00000213780  
ENSG00000214894 ENSG00000213780  
ENSG00000224328 ENSG00000213780  
ENSG00000270604 ENSG00000213780  
ENSG00000255621 ENSG00000213782  
ENSG00000214776 ENSG00000213809  
ENSG00000214826 ENSG00000213809  
ENSG00000245648 ENSG00000213809  
ENSG00000256667 ENSG00000213809  
ENSG00000256013 ENSG00000213853  
ENSG00000260468 ENSG00000213853  
ENSG00000215067 ENSG00000213859  
ENSG00000256806 ENSG00000213859  
ENSG00000215256 ENSG00000213903  
ENSG00000215256 ENSG00000213906  
ENSG00000278784 ENSG00000213906  
ENSG00000157306 ENSG00000213928  
ENSG00000215256 ENSG00000213928  
ENSG00000228352 ENSG00000213930  
ENSG00000230074 ENSG00000213930  
ENSG00000235481 ENSG00000213930  
ENSG00000248898 ENSG00000213949  
ENSG00000249899 ENSG00000213949  
ENSG00000267475 ENSG00000213965  
ENSG00000157306 ENSG00000213983  
ENSG00000258458 ENSG00000213983  
ENSG00000258727 ENSG00000213983



ENSG00000275880 ENSG00000213995  
ENSG00000269886 ENSG00000214021  
ENSG00000240449 ENSG00000214022  
ENSG00000244151 ENSG00000214022  
ENSG00000130600 ENSG00000214026  
ENSG00000238184 ENSG00000214026  
ENSG00000269821 ENSG00000214026  
ENSG00000230724 ENSG00000214063  
ENSG00000250397 ENSG00000214063  
ENSG00000116883 ENSG00000214193  
ENSG00000196167 ENSG00000214290  
ENSG00000214264 ENSG00000214290  
ENSG00000242294 ENSG00000214309  
ENSG00000242798 ENSG00000214309  
ENSG00000244219 ENSG00000214309  
ENSG00000272752 ENSG00000214309  
ENSG00000196810 ENSG00000214367  
ENSG00000249673 ENSG00000214367  
ENSG00000245148 ENSG00000214530  
ENSG00000223482 ENSG00000214562  
ENSG00000224914 ENSG00000214562  
ENSG00000236756 ENSG00000214655  
ENSG00000242338 ENSG00000214655  
ENSG00000250959 ENSG00000214655  
ENSG00000271816 ENSG00000214655  
ENSG00000271848 ENSG00000214655  
ENSG00000259267 ENSG00000214688  
ENSG00000235016 ENSG00000214706  
ENSG00000254454 ENSG00000214753  
ENSG00000256789 ENSG00000214756  
ENSG00000215067 ENSG00000215041  
ENSG00000256806 ENSG00000215041  
ENSG00000228010 ENSG00000215045  
ENSG00000230825 ENSG00000215045  
ENSG00000237517 ENSG00000215193  
ENSG00000280007 ENSG00000215193  
ENSG00000250490 ENSG00000215218  
ENSG00000235958 ENSG00000215251  
ENSG00000258458 ENSG00000215271  
ENSG00000234636 ENSG00000215301  
ENSG00000196810 ENSG00000215375  
ENSG00000244459 ENSG00000215375  
ENSG00000124224 ENSG00000215440  
ENSG00000175147 ENSG00000215704  
ENSG00000241720 ENSG00000215717  
ENSG00000227775 ENSG00000215790  
ENSG00000268575 ENSG00000215790  
ENSG00000269737 ENSG00000215790

ENSG00000223442 ENSG00000217128  
ENSG00000230612 ENSG00000217128  
ENSG00000262686 ENSG00000217930  
ENSG00000262712 ENSG00000217930  
ENSG00000267072 ENSG00000217930  
ENSG00000177822 ENSG00000218336  
ENSG00000166770 ENSG00000218891  
ENSG00000267649 ENSG00000218891  
ENSG00000215067 ENSG00000219200  
ENSG00000256806 ENSG00000219200  
ENSG00000264772 ENSG00000219200  
ENSG00000264772 ENSG00000220205  
ENSG00000227388 ENSG00000221829  
ENSG00000273597 ENSG00000221829  
ENSG00000253608 ENSG00000221869  
ENSG00000228350 ENSG00000221883  
ENSG00000247699 ENSG00000221886  
ENSG00000244627 ENSG00000221890  
ENSG00000279010 ENSG00000221890  
ENSG00000279080 ENSG00000221890  
ENSG00000242294 ENSG00000221909  
ENSG00000244219 ENSG00000221909  
ENSG00000272752 ENSG00000221909  
ENSG00000269834 ENSG00000221923  
ENSG00000227033 ENSG00000221944  
ENSG00000241288 ENSG00000221955  
ENSG00000242337 ENSG00000221972  
ENSG00000177757 ENSG00000221978  
ENSG00000230092 ENSG00000221978  
ENSG00000272106 ENSG00000221978  
ENSG00000230615 ENSG00000222009  
ENSG00000170629 ENSG00000222011  
ENSG00000236065 ENSG00000222046  
ENSG00000204188 ENSG00000223501  
ENSG00000225339 ENSG00000223501  
ENSG00000232940 ENSG00000223501  
ENSG00000267062 ENSG00000223547  
ENSG00000267082 ENSG00000223547  
ENSG00000267274 ENSG00000223547  
ENSG00000267277 ENSG00000223547  
ENSG00000267424 ENSG00000223547  
ENSG00000217801 ENSG00000224051  
ENSG00000268575 ENSG00000224051  
ENSG00000206337 ENSG00000224389  
ENSG00000229391 ENSG00000224389  
ENSG00000271581 ENSG00000224389  
ENSG00000235191 ENSG00000224420  
ENSG00000268006 ENSG00000224420

ENSG00000268047 ENSG00000224420  
ENSG00000204650 ENSG00000225190  
ENSG00000214425 ENSG00000225190  
ENSG00000260075 ENSG00000225190  
ENSG00000267278 ENSG00000225190  
ENSG00000260617 ENSG00000225614  
ENSG00000261273 ENSG00000225614  
ENSG00000262313 ENSG00000225663  
ENSG00000225313 ENSG00000225828  
ENSG00000235790 ENSG00000225828  
ENSG00000236065 ENSG00000225828  
ENSG00000224789 ENSG00000226479  
ENSG00000261126 ENSG00000226742  
ENSG00000231561 ENSG00000226763  
ENSG00000249341 ENSG00000226887  
ENSG00000204188 ENSG00000227057  
ENSG00000225339 ENSG00000227057  
ENSG00000206337 ENSG00000227507  
ENSG00000214894 ENSG00000227507  
ENSG00000271581 ENSG00000227507  
ENSG00000267493 ENSG00000228300  
ENSG00000234945 ENSG00000228474  
ENSG00000217801 ENSG00000228594  
ENSG00000227775 ENSG00000228594  
ENSG00000268575 ENSG00000228594  
ENSG00000281398 ENSG00000228672  
ENSG00000268981 ENSG00000229676  
ENSG00000235560 ENSG00000229809  
ENSG00000260083 ENSG00000229809  
ENSG00000260911 ENSG00000229809  
ENSG00000262721 ENSG00000229809  
ENSG00000243155 ENSG00000230124  
ENSG00000228352 ENSG00000230453  
ENSG00000269487 ENSG00000230510  
ENSG00000277531 ENSG00000230510  
ENSG00000244380 ENSG00000232112  
ENSG00000180539 ENSG00000232434  
ENSG00000237886 ENSG00000232434  
ENSG00000260193 ENSG00000232434  
ENSG00000206337 ENSG00000232810  
ENSG00000229391 ENSG00000232810  
ENSG00000266527 ENSG00000232859  
ENSG00000181126 ENSG00000234127  
ENSG00000233892 ENSG00000234127  
ENSG00000270604 ENSG00000234127  
ENSG00000224897 ENSG00000234224  
ENSG00000242593 ENSG00000234224  
ENSG00000274602 ENSG00000234409

ENSG00000164669 ENSG00000234444  
ENSG00000213904 ENSG00000234465  
ENSG00000247317 ENSG00000234616  
ENSG00000253931 ENSG00000234616  
ENSG00000254859 ENSG00000234616  
ENSG00000260488 ENSG00000234719  
ENSG00000206337 ENSG00000234745  
ENSG00000271581 ENSG00000234745  
ENSG00000272455 ENSG00000235098  
ENSG00000254338 ENSG00000235173  
ENSG00000254973 ENSG00000235173  
ENSG00000157306 ENSG00000235194  
ENSG00000215256 ENSG00000235194  
ENSG00000251002 ENSG00000235194  
ENSG00000258458 ENSG00000235194  
ENSG00000237037 ENSG00000235568  
ENSG00000204188 ENSG00000236104  
ENSG00000229391 ENSG00000236104  
ENSG00000246308 ENSG00000236287  
ENSG00000247271 ENSG00000236287  
ENSG00000255125 ENSG00000236287  
ENSG00000187953 ENSG00000236609  
ENSG00000224186 ENSG00000237190  
ENSG00000273345 ENSG00000237190  
ENSG00000204188 ENSG00000237441  
ENSG00000229391 ENSG00000237441  
ENSG00000263327 ENSG00000237765  
ENSG00000204650 ENSG00000238083  
ENSG00000237339 ENSG00000238227  
ENSG00000260193 ENSG00000238227  
ENSG00000222041 ENSG00000239305  
ENSG00000228363 ENSG00000239305  
ENSG00000254756 ENSG00000239306  
ENSG00000267698 ENSG00000239382  
ENSG00000271032 ENSG00000239382  
ENSG00000215067 ENSG00000239697  
ENSG00000256806 ENSG00000239697  
ENSG00000237737 ENSG00000239779  
ENSG00000176826 ENSG00000239789  
ENSG00000240859 ENSG00000239857  
ENSG00000267577 ENSG00000239998  
ENSG00000204188 ENSG00000240065  
ENSG00000204261 ENSG00000240065  
ENSG00000228737 ENSG00000240184  
ENSG00000272154 ENSG00000240184  
ENSG00000280029 ENSG00000240184  
ENSG00000230487 ENSG00000240230  
ENSG00000196295 ENSG00000240583

|                 |                 |
|-----------------|-----------------|
| ENSG00000281404 | ENSG00000240583 |
| ENSG00000271270 | ENSG00000240682 |
| ENSG00000224713 | ENSG00000240771 |
| ENSG00000257342 | ENSG00000240771 |
| ENSG00000236204 | ENSG00000240857 |
| ENSG00000215478 | ENSG00000240972 |
| ENSG00000218537 | ENSG00000240972 |
| ENSG00000273295 | ENSG00000240972 |
| ENSG00000235453 | ENSG00000241043 |
| ENSG00000188185 | ENSG00000241127 |
| ENSG00000164669 | ENSG00000241258 |
| ENSG00000179406 | ENSG00000241258 |
| ENSG00000224316 | ENSG00000241258 |
| ENSG00000230189 | ENSG00000241258 |
| ENSG00000272693 | ENSG00000241258 |
| ENSG00000183822 | ENSG00000241360 |
| ENSG00000233360 | ENSG00000241360 |
| ENSG00000235237 | ENSG00000241360 |
| ENSG00000214892 | ENSG00000241370 |
| ENSG00000270604 | ENSG00000241370 |
| ENSG00000272273 | ENSG00000241370 |
| ENSG00000206337 | ENSG00000241404 |
| ENSG00000253125 | ENSG00000241852 |
| ENSG00000179523 | ENSG00000242028 |
| ENSG00000259595 | ENSG00000242028 |
| ENSG00000225465 | ENSG00000242114 |
| ENSG00000172250 | ENSG00000242247 |
| ENSG00000226450 | ENSG00000242247 |
| ENSG00000225335 | ENSG00000242259 |
| ENSG00000237517 | ENSG00000242259 |
| ENSG00000243762 | ENSG00000242259 |
| ENSG00000231170 | ENSG00000242265 |
| ENSG00000236861 | ENSG00000242265 |
| ENSG00000088340 | ENSG00000242372 |
| ENSG00000259736 | ENSG00000242498 |
| ENSG00000204188 | ENSG00000242574 |
| ENSG00000272154 | ENSG00000243232 |
| ENSG00000280029 | ENSG00000243232 |
| ENSG00000232828 | ENSG00000243279 |
| ENSG00000106610 | ENSG00000243335 |
| ENSG00000179406 | ENSG00000243335 |
| ENSG00000226824 | ENSG00000243335 |
| ENSG00000229180 | ENSG00000243335 |
| ENSG00000230189 | ENSG00000243335 |
| ENSG00000230358 | ENSG00000243335 |
| ENSG00000232559 | ENSG00000243335 |
| ENSG00000234500 | ENSG00000243335 |
| ENSG00000272693 | ENSG00000243335 |

ENSG00000249673 ENSG00000243449  
ENSG00000235016 ENSG00000243477  
ENSG00000205485 ENSG00000243566  
ENSG00000205930 ENSG00000243646  
ENSG00000223799 ENSG00000243646  
ENSG00000227256 ENSG00000243646  
ENSG00000185904 ENSG00000243660  
ENSG00000230615 ENSG00000243710  
ENSG00000248124 ENSG00000243716  
ENSG00000257122 ENSG00000243716  
ENSG00000198711 ENSG00000243725  
ENSG00000159860 ENSG00000243896  
ENSG00000229153 ENSG00000243896  
ENSG00000244198 ENSG00000243896  
ENSG00000253882 ENSG00000243896  
ENSG00000231683 ENSG00000243955  
ENSG00000088340 ENSG00000244005  
ENSG00000232907 ENSG00000244005  
ENSG00000237975 ENSG00000244094  
ENSG00000273066 ENSG00000244187  
ENSG00000255108 ENSG00000244242  
ENSG00000244558 ENSG00000244274  
ENSG00000088340 ENSG00000244462  
ENSG00000232907 ENSG00000244462  
ENSG00000278367 ENSG00000244462  
ENSG00000237017 ENSG00000244482  
ENSG00000267265 ENSG00000244482  
ENSG00000267649 ENSG00000244482  
ENSG00000276570 ENSG00000244482  
ENSG00000226872 ENSG00000244486  
ENSG00000229107 ENSG00000244486  
ENSG00000244627 ENSG00000244509  
ENSG00000223534 ENSG00000244731  
ENSG00000236581 ENSG00000244754  
ENSG00000261324 ENSG00000246705  
ENSG00000248415 ENSG00000246922  
ENSG00000254966 ENSG00000247595  
ENSG00000243224 ENSG00000247596  
ENSG00000227486 ENSG00000247746  
ENSG00000237118 ENSG00000248098  
ENSG00000205786 ENSG00000249115  
ENSG00000267439 ENSG00000249115  
ENSG00000271032 ENSG00000249115  
ENSG00000272677 ENSG00000249242  
ENSG00000154874 ENSG00000249459  
ENSG00000228983 ENSG00000249459  
ENSG00000230662 ENSG00000249459  
ENSG00000262769 ENSG00000249459

ENSG00000176593 ENSG00000249471  
ENSG00000213753 ENSG00000249471  
ENSG00000267858 ENSG00000249471  
ENSG00000268230 ENSG00000249471  
ENSG00000268895 ENSG00000249471  
ENSG00000230606 ENSG00000249715  
ENSG00000231205 ENSG00000250067  
ENSG00000271499 ENSG00000250067  
ENSG00000133519 ENSG00000250479  
ENSG00000218537 ENSG00000250479  
ENSG00000272578 ENSG00000250479  
ENSG00000273000 ENSG00000250479  
ENSG00000280623 ENSG00000250479  
ENSG00000240370 ENSG00000250510  
ENSG00000248593 ENSG00000250510  
ENSG00000250116 ENSG00000250565  
ENSG00000247317 ENSG00000250571  
ENSG00000253716 ENSG00000250571  
ENSG00000177738 ENSG00000250722  
ENSG00000215068 ENSG00000250722  
ENSG00000248092 ENSG00000250722  
ENSG00000251131 ENSG00000250722  
ENSG00000229563 ENSG00000251192  
ENSG00000236751 ENSG00000251192  
ENSG00000267698 ENSG00000251247  
ENSG00000228252 ENSG00000251287  
ENSG00000244932 ENSG00000251287  
ENSG00000251474 ENSG00000251287  
ENSG00000253540 ENSG00000251287  
ENSG00000184319 ENSG00000251322  
ENSG00000228737 ENSG00000253159  
ENSG00000272154 ENSG00000253159  
ENSG00000278936 ENSG00000253159  
ENSG00000280029 ENSG00000253159  
ENSG00000253358 ENSG00000253250  
ENSG00000243193 ENSG00000253276  
ENSG00000231856 ENSG00000253309  
ENSG00000233672 ENSG00000253309  
ENSG00000236778 ENSG00000253309  
ENSG00000281106 ENSG00000253309  
ENSG00000249637 ENSG00000253485  
ENSG00000280029 ENSG00000253485  
ENSG00000272154 ENSG00000253537  
ENSG00000280029 ENSG00000253537  
ENSG00000224596 ENSG00000253626  
ENSG00000225484 ENSG00000253626  
ENSG00000230091 ENSG00000253626  
ENSG00000235426 ENSG00000253626

ENSG00000278616 ENSG00000253626  
ENSG00000236778 ENSG00000253710  
ENSG00000253608 ENSG00000253729  
ENSG00000272154 ENSG00000253731  
ENSG00000278936 ENSG00000253731  
ENSG00000280029 ENSG00000253731  
ENSG00000236778 ENSG00000253797  
ENSG00000281106 ENSG00000253797  
ENSG00000280029 ENSG00000253846  
ENSG00000272154 ENSG00000253873  
ENSG00000278936 ENSG00000253873  
ENSG00000280029 ENSG00000253873  
ENSG00000254099 ENSG00000253910  
ENSG00000278936 ENSG00000253910  
ENSG00000280029 ENSG00000253910  
ENSG00000254099 ENSG00000253953  
ENSG00000272154 ENSG00000253953  
ENSG00000280029 ENSG00000253953  
ENSG00000254340 ENSG00000253958  
ENSG00000233527 ENSG00000254004  
ENSG00000267049 ENSG00000254004  
ENSG00000267698 ENSG00000254004  
ENSG00000278936 ENSG00000254122  
ENSG00000280029 ENSG00000254122  
ENSG00000250347 ENSG00000254221  
ENSG00000254099 ENSG00000254221  
ENSG00000272154 ENSG00000254221  
ENSG00000280029 ENSG00000254221  
ENSG00000272154 ENSG00000254245  
ENSG00000280029 ENSG00000254245  
ENSG00000245532 ENSG00000254470  
ENSG00000254510 ENSG00000254470  
ENSG00000255404 ENSG00000254470  
ENSG00000157306 ENSG00000254505  
ENSG00000260669 ENSG00000254505  
ENSG00000278784 ENSG00000254505  
ENSG00000259905 ENSG00000254585  
ENSG00000246308 ENSG00000254598  
ENSG00000255125 ENSG00000254598  
ENSG00000130600 ENSG00000254827  
ENSG00000238184 ENSG00000254827  
ENSG00000255367 ENSG00000254827  
ENSG00000269821 ENSG00000254827  
ENSG00000250802 ENSG00000254893  
ENSG00000254510 ENSG00000254986  
ENSG00000255517 ENSG00000254986  
ENSG00000259488 ENSG00000255302  
ENSG00000259705 ENSG00000255302



ENSG00000256249 ENSG00000255398  
ENSG00000241163 ENSG00000255423  
ENSG00000196167 ENSG00000255561  
ENSG00000271584 ENSG00000255561  
ENSG00000246982 ENSG00000255587  
ENSG00000260160 ENSG00000256087  
ENSG00000269235 ENSG00000256087  
ENSG00000275055 ENSG00000256087  
ENSG00000231205 ENSG00000256229  
ENSG00000249035 ENSG00000256235  
ENSG00000266903 ENSG00000256294  
ENSG00000267348 ENSG00000256294  
ENSG00000224812 ENSG00000256574  
ENSG00000269102 ENSG00000256683  
ENSG00000269235 ENSG00000256683  
ENSG00000269388 ENSG00000256683  
ENSG00000267419 ENSG00000256771  
ENSG00000258302 ENSG00000257594  
ENSG00000270344 ENSG00000257594  
ENSG00000268061 ENSG00000257704  
ENSG00000269292 ENSG00000257704  
ENSG00000269487 ENSG00000257704  
ENSG00000257303 ENSG00000257727  
ENSG00000258317 ENSG00000257727  
ENSG00000258285 ENSG00000258102  
ENSG00000215067 ENSG00000258315  
ENSG00000256806 ENSG00000258315  
ENSG00000213793 ENSG00000258405  
ENSG00000269102 ENSG00000258405  
ENSG00000269646 ENSG00000258405  
ENSG00000269959 ENSG00000258405  
ENSG00000264031 ENSG00000258472  
ENSG00000266527 ENSG00000258472  
ENSG00000215256 ENSG00000258643  
ENSG00000251002 ENSG00000258643  
ENSG00000258458 ENSG00000258643  
ENSG00000223959 ENSG00000258839  
ENSG00000267048 ENSG00000258839  
ENSG00000223959 ENSG00000258947  
ENSG00000260259 ENSG00000258947  
ENSG00000260279 ENSG00000258947  
ENSG00000260528 ENSG00000258947  
ENSG00000261118 ENSG00000258947  
ENSG00000267048 ENSG00000258947  
ENSG00000234494 ENSG00000259207  
ENSG00000157306 ENSG00000259431  
ENSG00000258458 ENSG00000259431  
ENSG00000258727 ENSG00000259431

ENSG00000255571 ENSG00000259494  
ENSG00000166770 ENSG00000261221  
ENSG00000266907 ENSG00000261221  
ENSG00000267549 ENSG00000261221  
ENSG00000269696 ENSG00000261221  
ENSG00000206337 ENSG00000261272  
ENSG00000228737 ENSG00000262209  
ENSG00000249637 ENSG00000262209  
ENSG00000280029 ENSG00000262209  
ENSG00000267072 ENSG00000262246  
ENSG00000228737 ENSG00000262576  
ENSG00000272154 ENSG00000262576  
ENSG00000280029 ENSG00000262576  
ENSG00000260005 ENSG00000262814  
ENSG00000265148 ENSG00000264364  
ENSG00000263916 ENSG00000265681  
ENSG00000214176 ENSG00000266173  
ENSG00000233635 ENSG00000266173  
ENSG00000267765 ENSG00000266967  
ENSG00000188825 ENSG00000267060  
ENSG00000261126 ENSG00000267127  
ENSG00000266978 ENSG00000267534  
ENSG00000186019 ENSG00000267680  
ENSG00000266903 ENSG00000267680  
ENSG00000225872 ENSG00000267796  
ENSG00000267049 ENSG00000267796  
ENSG00000271032 ENSG00000267796  
ENSG00000276449 ENSG00000268182  
ENSG00000269486 ENSG00000269190  
ENSG00000130612 ENSG00000269858  
ENSG00000233622 ENSG00000269858  
ENSG00000237118 ENSG00000269858  
ENSG00000225578 ENSG00000270170  
ENSG00000225377 ENSG00000271303  
ENSG00000214174 ENSG00000271605  
ENSG00000204188 ENSG00000272325  
ENSG00000225339 ENSG00000272325  
ENSG00000224078 ENSG00000273173  
ENSG00000259905 ENSG00000273173

**Supplementary Table S6: GO term enrichment of lncRNAs expressed in CCs computed using the two unranked lists and the Gorilla tool.**

| GO term    | Description                              | P-value  | FDR q-val | Enrichment (N, B, n, b)    |
|------------|------------------------------------------|----------|-----------|----------------------------|
| GO:0044710 | single-organism metabolic process        | 3.91E-06 | 4.28E-02  | 1.05 (5276,1065,4617,974)  |
| GO:0044281 | small molecule metabolic process         | 2.99E-05 | 1.64E-01  | 1.06 (5276,556,4617,515)   |
| GO:0006952 | defense response                         | 3.85E-05 | 1.40E-01  | 1.08 (5276,268,4617,254)   |
| GO:0010506 | regulation of autophagy                  | 4.66E-05 | 1.27E-01  | 1.13 (5276,94,4617,93)     |
| GO:0034976 | response to endoplasmic reticulum stress | 4.79E-05 | 1.05E-01  | 1.14 (5276,74,4617,74)     |
| GO:0051186 | cofactor metabolic process               | 1.68E-04 | 3.07E-01  | 1.11 (5276,115,4617,112)   |
| GO:0051188 | cofactor biosynthetic process            | 3.64E-04 | 5.69E-01  | 1.14 (5276,59,4617,59)     |
| GO:0008152 | metabolic process                        | 3.79E-04 | 5.19E-01  | 1.02 (5276,2865,4617,2548) |
| GO:0006732 | coenzyme metabolic process               | 4.29E-04 | 5.21E-01  | 1.12 (5276,92,4617,90)     |
| GO:0001817 | regulation of cytokine production        | 4.42E-04 | 4.84E-01  | 1.09 (5276,182,4617,173)   |
| GO:0043436 | oxoacid metabolic process                | 5.12E-04 | 5.09E-01  | 1.06 (5276,332,4617,309)   |
| GO:0006082 | organic acid metabolic process           | 7.29E-04 | 6.65E-01  | 1.06 (5276,337,4617,313)   |
| GO:0019752 | carboxylic acid metabolic process        | 9.61E-04 | 8.09E-01  | 1.06 (5276,292,4617,272)   |

**Supplementary Table S7: GO term enrichment of lncRNAs expressed in MII oocytes computed using the two unranked lists and the Gorilla tool**

| GO term    | Description                         | P-value  | FDR q-value | Enrichment (N, B, n, b) |
|------------|-------------------------------------|----------|-------------|-------------------------|
| GO:0022402 | cell cycle process                  | 2.74E-09 | 3.00E-05    | 1.94 (5276,314,659,76)  |
| GO:1903047 | mitotic cell cycle process          | 2.42E-08 | 1.32E-04    | 2.07 (5276,220,659,57)  |
| GO:0022414 | reproductive process                | 3.75E-07 | 1.37E-03    | 1.73 (5276,362,659,78)  |
| GO:0051301 | cell division                       | 5.99E-06 | 1.64E-02    | 2.20 (5276,120,659,33)  |
| GO:0007062 | sister chromatid cohesion           | 6.02E-06 | 1.32E-02    | 3.85 (5276,27,659,13)   |
| GO:0043486 | histone exchange                    | 6.65E-06 | 1.21E-02    | 5.82 (5276,11,659,8)    |
| GO:0000280 | nuclear division                    | 7.32E-06 | 1.14E-02    | 2.45 (5276,85,659,26)   |
| GO:0010965 | regulation of mitotic sister chrom  | 7.85E-06 | 1.07E-02    | 5.15 (5276,14,659,9)    |
| GO:1902099 | regulation of metaphase/anapha      | 7.85E-06 | 9.55E-03    | 5.15 (5276,14,659,9)    |
| GO:0030071 | regulation of mitotic metaphase     | 7.85E-06 | 8.59E-03    | 5.15 (5276,14,659,9)    |
| GO:1903046 | meiotic cell cycle process          | 8.32E-06 | 8.28E-03    | 3.00 (5276,48,659,18)   |
| GO:0048285 | organelle fission                   | 1.44E-05 | 1.31E-02    | 2.32 (5276,93,659,27)   |
| GO:0007067 | mitotic nuclear division            | 1.78E-05 | 1.50E-02    | 2.55 (5276,69,659,22)   |
| GO:0044702 | single organism reproductive pro    | 1.93E-05 | 1.51E-02    | 1.68 (5276,291,659,61)  |
| GO:0007129 | synapsis                            | 2.33E-05 | 1.70E-02    | 6.86 (5276,7,659,6)     |
| GO:0051983 | regulation of chromosome segre      | 4.93E-05 | 3.37E-02    | 4.00 (5276,20,659,10)   |
| GO:0033047 | regulation of mitotic sister chrom  | 6.71E-05 | 4.32E-02    | 4.24 (5276,17,659,9)    |
| GO:0000086 | G2/M transition of mitotic cell cy  | 1.38E-04 | 8.39E-02    | 2.67 (5276,48,659,16)   |
| GO:0044772 | mitotic cell cycle phase transition | 1.43E-04 | 8.22E-02    | 2.26 (5276,78,659,22)   |
| GO:0023019 | signal transduction involved in re  | 1.61E-04 | 8.83E-02    | 6.67 (5276,6,659,5)     |
| GO:0043044 | ATP-dependent chromatin remo        | 1.63E-04 | 8.51E-02    | 4.27 (5276,15,659,8)    |
| GO:0070192 | chromosome organization involv      | 1.63E-04 | 8.12E-02    | 4.27 (5276,15,659,8)    |
| GO:0044770 | cell cycle phase transition         | 1.75E-04 | 8.33E-02    | 2.23 (5276,79,659,22)   |
| GO:0044839 | cell cycle G2/M phase transition    | 1.81E-04 | 8.28E-02    | 2.61 (5276,49,659,16)   |
| GO:0001764 | neuron migration                    | 1.92E-04 | 8.40E-02    | 3.10 (5276,31,659,12)   |
| GO:0033045 | regulation of sister chromatid se   | 2.02E-04 | 8.51E-02    | 3.79 (5276,19,659,9)    |
| GO:0034724 | DNA replication-independent nu      | 2.06E-04 | 8.37E-02    | 4.67 (5276,12,659,7)    |
| GO:0006336 | DNA replication-independent nu      | 2.06E-04 | 8.07E-02    | 4.67 (5276,12,659,7)    |
| GO:0051276 | chromosome organization             | 2.09E-04 | 7.88E-02    | 2.08 (5276,96,659,25)   |
| GO:0007389 | pattern specification process       | 2.09E-04 | 7.62E-02    | 2.08 (5276,96,659,25)   |
| GO:0034080 | CENP-A containing nucleosome a      | 2.23E-04 | 7.89E-02    | 5.34 (5276,9,659,6)     |
| GO:0031055 | chromatin remodeling at centrom     | 2.23E-04 | 7.64E-02    | 5.34 (5276,9,659,6)     |
| GO:0006310 | DNA recombination                   | 2.70E-04 | 8.95E-02    | 2.73 (5276,41,659,14)   |
| GO:0007276 | gamete generation                   | 4.13E-04 | 1.33E-01    | 2.00 (5276,100,659,25)  |
| GO:0048609 | multicellular organismal reprodu    | 4.40E-04 | 1.38E-01    | 1.86 (5276,129,659,30)  |
| GO:0051783 | regulation of nuclear division      | 6.26E-04 | 1.90E-01    | 2.37 (5276,54,659,16)   |
| GO:0007017 | microtubule-based process           | 7.41E-04 | 2.19E-01    | 1.71 (5276,169,659,36)  |
| GO:0007600 | sensory perception                  | 9.93E-04 | 2.86E-01    | 2.03 (5276,83,659,21)   |

**Supplementary Table S8: List of the samples included in the RNA-seq data meta-analysis**

**A. RNA-seq data from human oocytes & Cumulus granulosa cells**

| <b>categories</b>       | <b>SRR number</b> | <b>GSM number</b> | <b>Number</b> |
|-------------------------|-------------------|-------------------|---------------|
| Oocytes                 | SRR2130085        | GSM1833279        | 10            |
|                         | SRR2130086        | GSM1833280        |               |
|                         | SRR2130087        | GSM1833281        |               |
|                         | SRR2130088        | GSM1833282        |               |
|                         | SRR893046         | GSM1160112        |               |
|                         | SRR893047         | GSM1160113        |               |
|                         | SRR893048         | GSM1160114        |               |
|                         | SRR445718         | GSM896803         |               |
|                         | SRR445719         | GSM896804         |               |
|                         | SRR445720         | GSM896805         |               |
| Cumulus granulosa cells | SRR956938         | GSM1215104        | 10            |
|                         | SRR956939         | GSM1215105        |               |
|                         | SRR956940         | GSM1215106        |               |
|                         | SRR836179         | GSM1131193        |               |
|                         | SRR836180         | GSM1131194        |               |
|                         | SRR1602519        | GSM1519560        |               |
|                         | SRR1602522        | GSM1519561        |               |
|                         | SRR1602525        | GSM1519562        |               |
|                         | SRR1602528        | GSM1519563        |               |
|                         | SRR1602531        | GSM1519564        |               |
| Cumulus younger         | SRR3540217        | GSM2157535        | 9             |
|                         | SRR3540218        | GSM2157536        |               |
|                         | SRR3540219        | GSM2157537        |               |
|                         | SRR3540220        | GSM2157538        |               |
|                         | SRR3540221        | GSM2157539        |               |
|                         | SRR3540222        | GSM2157540        |               |
|                         | SRR3540223        | GSM2157541        |               |
|                         | SRR3540224        | GSM2157542        |               |
|                         | SRR3540225        | GSM2157543        |               |
| Cumulus older           | SRR3540228        | GSM2157546        | 9             |
|                         | SRR3540229        | GSM2157547        |               |
|                         | SRR3540230        | GSM2157548        |               |
|                         | SRR3540231        | GSM2157549        |               |
|                         | SRR3540232        | GSM2157550        |               |
|                         | SRR3540233        | GSM2157551        |               |
|                         | SRR3540234        | GSM2157552        |               |
|                         | SRR3540235        | GSM2157553        |               |
|                         | SRR3540236        | GSM2157554        |               |

**B. RNA-seq data from human pre-implantation**

| <b>Categories</b> | <b>Sample reference number</b> | <b>Pubmed ID</b> | <b>Number</b> |
|-------------------|--------------------------------|------------------|---------------|
| Zygote            | GSM896806                      | 23934149         | 5             |
|                   | GSM896807                      | 23934149         |               |
|                   | GSM896808                      | 23934149         |               |
|                   | GSM1160118                     | 23934149         |               |
|                   | GSM1160119                     | 23934149         |               |

|               |            |          |    |
|---------------|------------|----------|----|
| 2-cell embryo | GSM896809  | 23934149 | 6  |
|               | GSM896810  | 23934149 |    |
|               | GSM896811  | 23934149 |    |
|               | GSM896812  | 23934149 |    |
|               | GSM896813  | 23934149 |    |
|               | GSM896814  | 23934149 |    |
| 4-cell embryo | GSM922146  | 23934149 | 20 |
|               | GSM922147  | 23934149 |    |
|               | GSM922148  | 23934149 |    |
|               | GSM922149  | 23934149 |    |
|               | GSM922150  | 23934149 |    |
|               | GSM922151  | 23934149 |    |
|               | GSM922152  | 23934149 |    |
|               | GSM922153  | 23934149 |    |
|               | GSM922154  | 23934149 |    |
|               | GSM922155  | 23934149 |    |
|               | GSM922156  | 23934149 |    |
|               | GSM922157  | 23934149 |    |
|               | GSM1160123 | 23892778 |    |
|               | GSM1160124 | 23892778 |    |
|               | GSM1160125 | 23892778 |    |
|               | GSM1160126 | 23892778 |    |
|               | GSM1160123 | 23892778 |    |
|               | GSM1160124 | 23892778 |    |
|               | GSM1160125 | 23892778 |    |
|               | GSM1160126 | 23892778 |    |
| 8-cell embryo | GSM922158  | 23934149 | 20 |
|               | GSM922159  | 23934149 |    |
|               | GSM922160  | 23934149 |    |
|               | GSM922161  | 23934149 |    |
|               | GSM922162  | 23934149 |    |
|               | GSM922163  | 23934149 |    |
|               | GSM922164  | 23934149 |    |
|               | GSM922165  | 23934149 |    |
|               | GSM922166  | 23934149 |    |
|               | GSM922167  | 23934149 |    |
|               | GSM922168  | 23934149 |    |
|               | GSM922169  | 23934149 |    |
|               | GSM922170  | 23934149 |    |
|               | GSM922171  | 23934149 |    |
|               | GSM922172  | 23934149 |    |
|               | GSM922173  | 23934149 |    |
|               | GSM922174  | 23934149 |    |
|               | GSM922175  | 23934149 |    |
| GSM922176     | 23934149   |          |    |
| GSM922177     | 23934149   |          |    |
|               | GSM922178  | 23934149 |    |
|               | GSM922179  | 23934149 |    |
|               | GSM922180  | 23934149 |    |

|           |                 |           |    |
|-----------|-----------------|-----------|----|
| Morulae   | GSM922181       | 23934149  | 16 |
|           | GSM922182       | 23934149  |    |
|           | GSM922183       | 23934149  |    |
|           | GSM922184       | 23934149  |    |
|           | GSM922185       | 23934149  |    |
|           | GSM922186       | 23934149  |    |
|           | GSM922187       | 23934149  |    |
|           | GSM922188       | 23934149  |    |
|           | GSM922189       | 23934149  |    |
|           | GSM922190       | 23934149  |    |
|           | GSM922191       | 23934149  |    |
|           | GSM922192       | 23934149  |    |
|           | GSM922193       | 23934149  |    |
|           | Late blastocyst | GSM922194 |    |
| GSM922195 |                 | 23934149  |    |
| GSM922196 |                 | 23934149  |    |
| GSM922197 |                 | 23934149  |    |
| GSM922198 |                 | 23934149  |    |
| GSM922199 |                 | 23934149  |    |
| GSM922200 |                 | 23934149  |    |
| GSM922201 |                 | 23934149  |    |
| GSM922202 |                 | 23934149  |    |
| GSM922203 |                 | 23934149  |    |
| GSM922204 |                 | 23934149  |    |
| GSM922205 |                 | 23934149  |    |
| GSM922206 |                 | 23934149  |    |
| GSM922207 |                 | 23934149  |    |
| GSM922208 |                 | 23934149  |    |
| GSM922209 |                 | 23934149  |    |
| GSM922210 |                 | 23934149  |    |
| GSM922211 |                 | 23934149  |    |
| GSM922212 |                 | 23934149  |    |
| GSM922213 |                 | 23934149  |    |
| GSM922214 |                 | 23934149  |    |
| GSM922215 |                 | 23934149  |    |
| GSM922216 |                 | 23934149  |    |
| GSM922217 | 23934149        |           |    |
| GSM922218 | 23934149        |           |    |
| GSM922219 | 23934149        |           |    |
| GSM922220 | 23934149        |           |    |
| GSM922221 | 23934149        |           |    |
| GSM922222 | 23934149        |           |    |
| GSM922223 | 23934149        |           |    |

**Supplementary Table S9: List of the 147 lncRNAs down-regulated in CColder samples**

| Gene ID         | Gene Name       | Chrom | Start_position | End_positor | Folde ch | q-value(%) |
|-----------------|-----------------|-------|----------------|-------------|----------|------------|
| ENSG00000219392 | ENSG00000219392 | 6     | 28115628       | 28116551    | 6        | 3,0564507  |
| ENSG00000238246 | ENSG00000238246 | 10    | 20070805       | 20091784    | 5,6      | 3,0564507  |
| ENSG00000254693 | ENSG00000254693 | 11    | 44604508       | 44605337    | 5,6      | 3,0564507  |
| ENSG00000264943 | SH3GL1P2        | 17    | 30624413       | 30625494    | 5,4      | 3,0564507  |
| ENSG00000261204 | ENSG00000261204 | 19    | 637105         | 637537      | 5,4      | 3,0564507  |
| ENSG00000229948 | B3GALNT1P1      | 2     | 69597353       | 69598951    | 5,2      | 3,0564507  |
| ENSG00000197813 | ENSG00000197813 | 19    | 49331617       | 49340303    | 4,7      | 3,0564507  |
| ENSG00000257764 | ENSG00000257764 | 12    | 69353493       | 69354225    | 4,4      | 3,0564507  |
| ENSG00000273712 | ENSG00000273712 | 6     | 28315613       | 28315883    | 4,4      | 3,0564507  |
| ENSG00000267580 | ENSG00000267580 | 19    | 33299934       | 33301168    | 4,2      | 3,0564507  |
| ENSG00000224394 | GPC6-AS2        | 13    | 93818424       | 93836144    | 4,2      | 3,0564507  |
| ENSG00000259417 | LINC01314       | 15    | 80195484       | 80252213    | 4,2      | 3,0564507  |
| ENSG00000267034 | ENSG00000267034 | 2     | 222317242      | 222318653   | 4,2      | 3,0564507  |
| ENSG00000233538 | ENSG00000233538 | 2     | 231452195      | 231453153   | 4        | 3,0564507  |
| ENSG00000228386 | ENSG00000228386 | 20    | 34014969       | 34017749    | 4        | 3,0564507  |
| ENSG00000261286 | ENSG00000261286 | 16    | 84459259       | 84467361    | 3,9      | 3,0564507  |
| ENSG00000270760 | ENSG00000270760 | 19    | 36144081       | 36148348    | 3,7      | 3,0564507  |
| ENSG00000227527 | ENSG00000227527 | 1     | 42335386       | 42338376    | 3,7      | 3,0564507  |
| ENSG00000223653 | ENSG00000223653 | 1     | 85276715       | 85448124    | 3,6      | 3,0564507  |
| ENSG00000260103 | ENSG00000260103 | 15    | 74478070       | 74490286    | 3,6      | 3,0564507  |
| ENSG00000278772 | LINC00548       | 13    | 40194509       | 40220502    | 3,6      | 3,0564507  |
| ENSG00000125997 | BPIFB9P         | 20    | 33347720       | 33354444    | 3,5      | 3,0564507  |
| ENSG00000232259 | ENSG00000232259 | 10    | 127929376      | 127934517   | 3,5      | 3,0564507  |
| ENSG00000215156 | ENSG00000215156 | 5     | 34190056       | 34193653    | 3,5      | 3,0564507  |
| ENSG00000226101 | ENSG00000226101 | 17    | 72072333       | 72093481    | 3,5      | 3,0564507  |
| ENSG00000235448 | LURAP1L-AS1     | 9     | 12700100       | 12814345    | 3,4      | 3,0564507  |
| ENSG00000253330 | ENSG00000253330 | 8     | 47511034       | 47512141    | 3,4      | 3,0564507  |
| ENSG00000224919 | ENSG00000224919 | 10    | 47496212       | 47502195    | 3,4      | 3,0564507  |
| ENSG00000255148 | ENSG00000255148 | 1     | 149018671      | 149026269   | 3,4      | 3,0564507  |
| ENSG00000259840 | ENSG00000259840 | 16    | 710746         | 711277      | 3,3      | 3,0564507  |
| ENSG00000234369 | TATDN1P1        | 10    | 63222155       | 63223045    | 3,3      | 3,0564507  |
| ENSG00000248415 | GAPDHP61        | 15    | 64528667       | 64529671    | 3,3      | 3,0564507  |
| ENSG00000223652 | ENSG00000223652 | 5     | 123087248      | 123090299   | 3,3      | 3,0564507  |
| ENSG00000228779 | ENSG00000228779 | 16    | 125737         | 127219      | 3,1      | 3,0564507  |
| ENSG00000215284 | ENSG00000215284 | X     | 46725164       | 46725818    | 3,1      | 3,0564507  |
| ENSG00000231010 | ENSG00000231010 | 22    | 46055740       | 46058160    | 3,1      | 3,0564507  |
| ENSG00000225695 | HNRNPA1P35      | 2     | 201063089      | 201064051   | 3,1      | 3,0564507  |
| ENSG00000223969 | ENSG00000223969 | 7     | 90590619       | 90597353    | 3        | 3,0564507  |
| ENSG00000261071 | ENSG00000261071 | 6     | 13614111       | 13615155    | 3        | 3,0564507  |
| ENSG00000258824 | ENSG00000258824 | 14    | 64422935       | 64448557    | 2,9      | 3,0564507  |
| ENSG00000276384 | ENSG00000276384 | 17    | 7557820        | 7558245     | 2,9      | 3,0564507  |
| ENSG00000268938 | ENSG00000268938 | 19    | 18531613       | 18532632    | 2,9      | 3,0564507  |
| ENSG00000261079 | ENSG00000261079 | 16    | 74367462       | 74369826    | 2,9      | 3,0564507  |
| ENSG00000204623 | ZNRD1-AS1       | 6     | 30001011       | 30061640    | 2,8      | 3,0564507  |
| ENSG00000259986 | ENSG00000259986 | 15    | 83179182       | 83439445    | 2,8      | 3,0564507  |
| ENSG00000253284 | ENSG00000253284 | 12    | 19147074       | 19154659    | 2,8      | 3,0564507  |
| ENSG00000280710 | ENSG00000280710 | 13    | 99498524       | 99501315    | 2,8      | 3,0564507  |
| ENSG00000204282 | TNRC6C-AS1      | 17    | 78107398       | 78111799    | 2,8      | 3,0564507  |



|                 |                 |    |           |           |     |           |
|-----------------|-----------------|----|-----------|-----------|-----|-----------|
| ENSG00000278434 | ENSG00000278434 | 16 | 4532216   | 4533670   | 2,7 | 3,0564507 |
| ENSG00000259236 | GOLGA8VP        | 15 | 101771758 | 101781989 | 2,7 | 3,0564507 |
| ENSG00000277998 | ENSG00000277998 | 2  | 164573741 | 164574054 | 2,7 | 3,0564507 |
| ENSG00000204044 | ENSG00000204044 | 20 | 46013500  | 46022073  | 2,7 | 3,0564507 |
| ENSG00000259370 | ENSG00000259370 | 15 | 62827675  | 62884034  | 2,7 | 3,0564507 |
| ENSG00000266053 | NDUFV2-AS1      | 18 | 9121265   | 9136645   | 2,7 | 3,0564507 |
| ENSG00000255301 | ENSG00000255301 | 11 | 57476493  | 57477534  | 2,7 | 3,0564507 |
| ENSG00000277287 | ENSG00000277287 | 20 | 3239705   | 3245382   | 2,7 | 3,0564507 |
| ENSG00000267601 | ENSG00000267601 | 17 | 78855478  | 78855844  | 2,7 | 3,0564507 |
| ENSG00000268203 | ENSG00000268203 | 19 | 6494320   | 6494805   | 2,7 | 3,0564507 |
| ENSG00000237188 | ENSG00000237188 | 1  | 147172771 | 147211568 | 2,6 | 3,0564507 |
| ENSG00000276166 | ENSG00000276166 | 16 | 57759358  | 57760024  | 2,6 | 3,0564507 |
| ENSG00000235910 | APOA1-AS        | 11 | 116836117 | 116855729 | 2,6 | 3,0564507 |
| ENSG00000204261 | PSMB8-AS1       | 6  | 32844086  | 32846495  | 2,6 | 3,0564507 |
| ENSG00000245205 | EEF1A1P4        | 12 | 19456244  | 19457648  | 2,6 | 3,0564507 |
| ENSG00000236838 | ENSG00000236838 | 17 | 2213697   | 2214414   | 2,5 | 3,0564507 |
| ENSG00000260165 | ENSG00000260165 | 15 | 75480661  | 75480836  | 2,5 | 3,0564507 |
| ENSG00000267571 | ENSG00000267571 | 19 | 5911578   | 5913899   | 2,5 | 3,0564507 |
| ENSG00000233838 | DPH3P1          | 20 | 62845664  | 62845912  | 2,5 | 3,0564507 |
| ENSG00000228021 | ENSG00000228021 | 10 | 125683229 | 125709677 | 2,5 | 3,0564507 |
| ENSG00000163915 | IGF2BP2-AS1     | 3  | 185712528 | 185729787 | 2,5 | 3,0564507 |
| ENSG00000162888 | C1orf147        | 1  | 206491116 | 206497728 | 2,5 | 3,0564507 |
| ENSG00000258232 | ENSG00000258232 | 12 | 49265156  | 49273306  | 2,4 | 3,0564507 |
| ENSG00000228109 | MFI2-AS1        | 3  | 196999460 | 197004744 | 2,4 | 3,0564507 |
| ENSG00000236358 | ENSG00000236358 | 1  | 234357006 | 234365828 | 2,4 | 3,0564507 |
| ENSG00000249996 | ENSG00000249996 | 5  | 123036271 | 123054667 | 2,4 | 3,0564507 |
| ENSG00000254429 | ENSG00000254429 | 11 | 75260127  | 75261025  | 2,4 | 3,0564507 |
| ENSG00000234290 | ENSG00000234290 | 5  | 132468890 | 132473043 | 2,4 | 3,0564507 |
| ENSG00000232818 | RPS2P32         | 7  | 23490473  | 23491364  | 2,4 | 3,0564507 |
| ENSG00000255968 | ENSG00000255968 | 12 | 26318953  | 26421462  | 2,4 | 3,0564507 |
| ENSG00000268191 | ENSG00000268191 | 19 | 6494320   | 6495025   | 2,4 | 3,0564507 |
| ENSG00000248100 | ENSG00000248100 | 12 | 27547050  | 27552773  | 2,4 | 3,0564507 |
| ENSG00000249602 | ENSG00000249602 | 1  | 151763384 | 151769501 | 2,3 | 3,0564507 |
| ENSG00000273523 | ENSG00000273523 | 13 | 52128891  | 52132723  | 2,3 | 3,0564507 |
| ENSG00000261586 | ENSG00000261586 | 12 | 51817899  | 51820150  | 2,3 | 3,0564507 |
| ENSG00000227954 | TARID           | 6  | 133502252 | 133892802 | 2,3 | 3,0564507 |
| ENSG00000230561 | LINC01183       | 5  | 127703390 | 127941634 | 2,3 | 3,0564507 |
| ENSG00000260755 | ENSG00000260755 | 16 | 66509437  | 66510048  | 2,3 | 3,0564507 |
| ENSG00000259133 | ENSG00000259133 | 14 | 56648965  | 56730535  | 2,3 | 3,0564507 |
| ENSG00000261759 | ENSG00000261759 | 16 | 19119976  | 19121629  | 2,3 | 3,0564507 |
| ENSG00000188365 | ENSG00000188365 | 7  | 5419846   | 5423122   | 2,3 | 3,0564507 |
| ENSG00000257808 | ENSG00000257808 | 12 | 53159586  | 53161000  | 2,3 | 3,0564507 |
| ENSG00000223799 | IL10RB-AS1      | 21 | 33263873  | 33266260  | 2,3 | 3,0564507 |
| ENSG00000255031 | ENSG00000255031 | 11 | 68050740  | 68053762  | 2,3 | 3,0564507 |
| ENSG00000272149 | ENSG00000272149 | 3  | 33144104  | 33147721  | 2,3 | 3,0564507 |
| ENSG00000237732 | ENSG00000237732 | 2  | 222318275 | 222352989 | 2,3 | 3,0564507 |
| ENSG00000254559 | ENSG00000254559 | 11 | 203623    | 205470    | 2,3 | 3,0564507 |
| ENSG00000232879 | ENSG00000232879 | 1  | 161034834 | 161035006 | 2,2 | 3,0564507 |
| ENSG00000275371 | ENSG00000275371 | 16 | 30110895  | 30111955  | 2,2 | 3,0564507 |
| ENSG00000253392 | ENSG00000253392 | 19 | 2915146   | 2926807   | 2,2 | 3,0564507 |
| ENSG00000262155 | ENSG00000262155 | 16 | 25066937  | 25068943  | 2,2 | 3,0564507 |

|                 |                 |    |           |           |     |           |
|-----------------|-----------------|----|-----------|-----------|-----|-----------|
| ENSG00000261976 | ENSG00000261976 | 17 | 50840057  | 50841626  | 2,2 | 3,0564507 |
| ENSG00000248671 | ENSG00000248671 | 11 | 71794363  | 71818238  | 2,2 | 3,0564507 |
| ENSG00000246596 | ENSG00000246596 | 5  | 177619059 | 177672209 | 2,2 | 3,0564507 |
| ENSG00000250261 | CCDC74BP1       | 22 | 20587496  | 20592218  | 2,2 | 3,0564507 |
| ENSG00000256116 | ENSG00000256116 | 11 | 64229214  | 64234352  | 2,2 | 3,0564507 |
| ENSG00000182841 | RRP7BP          | 22 | 42555223  | 42582038  | 2,2 | 3,0564507 |
| ENSG00000227620 | ALG1L8P         | 11 | 67785273  | 67792335  | 2,2 | 3,0564507 |
| ENSG00000267352 | SH3GL1P3        | 17 | 68134675  | 68135604  | 2,2 | 3,0564507 |
| ENSG00000234936 | ENSG00000234936 | 2  | 43229573  | 43233394  | 2,2 | 3,0564507 |
| ENSG00000268636 | ENSG00000268636 | 19 | 49625994  | 49626439  | 2,2 | 3,0564507 |
| ENSG00000267984 | ENSG00000267984 | 19 | 51345169  | 51353293  | 2,2 | 3,0564507 |
| ENSG00000264701 | ENSG00000264701 | 17 | 47980398  | 47996196  | 2,2 | 3,0564507 |
| ENSG00000261779 | ENSG00000261779 | 15 | 75211301  | 75212167  | 2,1 | 3,0564507 |
| ENSG00000269318 | ENSG00000269318 | 19 | 4356637   | 4358448   | 2,1 | 3,0564507 |
| ENSG00000228318 | ENSG00000228318 | 21 | 41441056  | 41445708  | 2,1 | 3,0564507 |
| ENSG00000243368 | MCCC1-AS1       | 3  | 183016255 | 183017808 | 2,1 | 3,0564507 |
| ENSG00000261460 | ENSG00000261460 | 15 | 72278867  | 72351794  | 2,1 | 3,0564507 |
| ENSG00000204791 | ENSG00000204791 | 8  | 144049129 | 144051522 | 2,1 | 3,0564507 |
| ENSG00000203993 | ARRDC1-AS1      | 9  | 137615332 | 137618906 | 2,1 | 3,0564507 |
| ENSG00000257270 | ENSG00000257270 | 14 | 105467793 | 105470617 | 2,1 | 3,0564507 |
| ENSG00000279184 | ENSG00000279184 | 22 | 35160947  | 35215025  | 2,1 | 3,0564507 |
| ENSG00000271969 | ENSG00000271969 | 12 | 6964949   | 6965382   | 2,1 | 3,0564507 |
| ENSG00000249593 | ENSG00000249593 | 5  | 139012647 | 139051203 | 2,1 | 3,0564507 |
| ENSG00000257913 | ENSG00000257913 | 12 | 48998367  | 49019235  | 2,1 | 3,0564507 |
| ENSG00000272223 | ENSG00000272223 | 6  | 43033897  | 43034405  | 2,1 | 3,0564507 |
| ENSG00000227487 | NCAM1-AS1       | 11 | 113269532 | 113273901 | 2,1 | 3,0564507 |
| ENSG00000273253 | ENSG00000273253 | 22 | 50199090  | 50200837  | 2,1 | 3,0564507 |
| ENSG00000261663 | ENSG00000261663 | 16 | 2240487   | 2241818   | 2,1 | 3,0564507 |
| ENSG00000272909 | ENSG00000272909 | 14 | 64440369  | 64442238  | 2,1 | 3,0564507 |
| ENSG00000259780 | ENSG00000259780 | 16 | 2235689   | 2236913   | 2,1 | 3,0564507 |
| ENSG00000260083 | MIR762HG        | 16 | 30875222  | 30895220  | 2,1 | 3,0564507 |
| ENSG00000247228 | ENSG00000247228 | 16 | 70156340  | 70173448  | 2,1 | 3,0564507 |
| ENSG00000237883 | DGUOK-AS1       | 2  | 73947642  | 73981441  | 2,1 | 3,0564507 |
| ENSG00000261312 | ENSG00000261312 | 16 | 19706351  | 19715383  | 2,1 | 3,0564507 |
| ENSG00000267484 | ENSG00000267484 | 19 | 4838332   | 4838907   | 2,1 | 3,0564507 |
| ENSG00000228274 | ENSG00000228274 | 22 | 38667585  | 38681820  | 2   | 3,0564507 |
| ENSG00000230289 | ENSG00000230289 | 9  | 131516558 | 131522229 | 2   | 3,0564507 |
| ENSG00000258938 | ENSG00000258938 | 14 | 35819224  | 35826765  | 2   | 3,0564507 |
| ENSG00000224699 | LAMTOR5-AS1     | 1  | 110347116 | 110443817 | 2   | 3,0564507 |
| ENSG00000259006 | ENSG00000259006 | 16 | 89919827  | 89922662  | 2   | 3,0564507 |
| ENSG00000238279 | ENSG00000238279 | 1  | 153533603 | 153535115 | 2   | 3,0564507 |
| ENSG00000240889 | NDUFB2-AS1      | 7  | 140695336 | 140697077 | 2   | 3,0564507 |
| ENSG00000257342 | ENSG00000257342 | 12 | 57694132  | 57721510  | 2   | 3,0564507 |
| ENSG00000270094 | ENSG00000270094 | 1  | 228394290 | 228396967 | 2   | 3,0564507 |
| ENSG00000267030 | ENSG00000267030 | 19 | 4447304   | 4448217   | 2   | 3,0564507 |
| ENSG00000232807 | ENSG00000232807 | 10 | 5934270   | 5945900   | 2   | 3,0564507 |
| ENSG00000228242 | ENSG00000228242 | 3  | 14144637  | 14165978  | 2   | 3,0564507 |
| ENSG00000263165 | ENSG00000263165 | 17 | 4163910   | 4164713   | 2   | 3,0564507 |

**Supplementary Table S10: Primer pairs used for validating the RNA-seq data by qRT-PCR**

| Gene      | qPCR primer                      |
|-----------|----------------------------------|
| BCAR4     | F : 5'-CGATGCTTGTCTTGCTCTGA-3'   |
|           | R : 5'-CCGCTTTTTCGTATCACTCC-3    |
| OOEP-AS1  | F : 5'-GGTACTCTGGCTGCTTGAGG-3'   |
|           | R : 5'-GCTTTTCTCCCTACCCCAAC-3'   |
| CASC8     | F : 5'-AGCCTATGGAGAGGATGCAA-3'   |
|           | R : 5'-AGGGACAGCTTGTGTCTGCT-3'   |
| TUNAR     | F : 5'-GGGATTATCGGGACCATTCT-3'   |
|           | R : 5'-GTTCTCGCAGGGTCTGGTC-3'    |
| C3orf56   | F : 5'-TGCTGTCTTCCAGCATTG-3'     |
|           | R : 5'-GATGGGGTGAGGAGTGAGAA-3'   |
| LINC01118 | F : 5'-ACGAAGGGCGGAAATTATCT-3'   |
|           | R : 5'-CCCTATCCCACATCAACCAC-3'   |
| ANXA2P2   | F : 5'-GACCAAAGGTGTGGATGAGG-3'   |
|           | R : 5'-CAAAATCACCGTCTCCAGGT-3'   |
| IL6STP1   | F : 5'- CGTGAAGGGAAACACACTT-3'   |
|           | R : 5'- CAAGGCATTCTCTGCTTCT-3'   |
| MALAT1    | F : 5'-GCTTGAGGAAACCGCAGATA-3'   |
|           | R : 5'-TCTCAACCTCCGTCAATGTTTT-3' |
